# Supplementary material for: Experimental evolution of a mammalian holobiont: selection for herbivorous capability in bank voles yields distinct and robust gut microbial communities
Source: Research Square preprint supplement (doi:10.21203/rs.3.rs-4765186/v1), 2024-08-05
Supplement: Supplementary file 1 [file 3f22e5eb0680d31d1b1aa925.xlsx]

## Sheet: Info
Gen BN of the selection experiment on voles
M. Lipowska, E.Sadowska, and P. Koteja, in collaboration with K. Kohl
microbiome project - effect of cohabitation
tables compiling the result s of statistical analyses, provisional Spplemetary Tables accompanying the publicaiton.
analysed with ANCOVA models in SAS, adonis2 PERMANOVA in R and ANCOM-BC2 in R
models including either all animals, or excluding those from the Ci-present group, or performed separately for two cage types or diet types
tables with reduced models only: non-significant interactions removed from the models, except for these of key interest
microbiome covariates added to the reduced models
Raw data file:	GBN_MicroCH_data_v3_20230828.xlsx
File with supplementary tables
2024-01-11	created based on:	MicroCF_ms_SupplTables_v1_20240105.xlsx
History of edits:
2024-01-11	MicroCH_table-preparation_20240111.xlsx
	emptied tables, prepared them for new data
	edited info header
2024-01-19	MicroCH_table-preparation_20240119.xlsx
	introduced data to tables S1, S2, S3, S4, S5, S6, S7
2024-03-05	MicroCH_table-preparation_20240305.xlsx
	reformatted the tables to fit the same format as in MicroCF_SupplTables_submit_20240128.xlsx
	all tables fitted with data now
	MicroCH_tables_fixed_20240305.xlsx
	fixed formulas
	all sheets colored blue are raw sheets gathering data presented in publication-type tables
2024-06-04	MicroCH_SupplTables_20240604.xlsx
	added TS0 with counts of individuals in subgroups - all tables to be renumbered
	removed data source tables from the tail end of the file
2024-06-05	MicroCH_SupplTables_20240605.xlsx
	PK: tables renumbered (0-12 -> 1-13)
	resized the combined cells with titles//legends of the tables
2024-06-06	MicroCH_SupplTables_20240606.xlsx
	renamed columns in TS1 from "individual C × cohabitant H" to "individual C cohabited with H", because apparently the previous version was misleading
	added a row showing the number of pairs
2024-06-06	MicroCH_SupplTables_20240606_PK.xlsx
	PK: in column names "individuals linetype" to "focal individual linetype", or in title/legend added explanation that "indiv' = focalindividual"
	(the change made becasue "cohabitatnt" is also an individual)
2024-06-07	MicroCH_SupplTables_20240607_PK.xlsx
	PK: a working version with color highligts to help transferring results to ms.
	Added p values for selectoin effect to TS4 with mean abundances .
	Discovered gross error in table TS11 - absultue abundances for genera. Two genera that should be nt there are included, and all the data records are shifted, so that they do not match the genera names in column B
	Added sheet: "TS11-POPRAWIONA_Genus_AbsAbund" with proposed corrections (assumn that all the data actuallly match genera identity in columns AK-AM.
2024-06-10	MicroCH_SupplTables_20240610.xlsx
	checked the source of error: upon creation of the table it was originally longer by 2 genera, it was updated with a shorter list, but the column "taxon analyzed" did not update alongside with the "Tax_full" column, extra rows were also not removed
	corrected TS11 itself (re-did the "taxon analyzed" column, removed extra rows), removed highlights and the "POPRAWIONA" sheet
	checked TS8-TS13 for the same error, did not find it
	checked lists of genera in TS 9,11,12,13, they list the same taxa
	added the expanded version of the TS1 table from file MicroCH_SupplTables_20240607.xlsx
2024-06-12	MicroCH_SupplTables_20240612.xlsx
	corrected TS12 - pevious p-values were for SD slopes only, not nommon slopes!
	added TS12a - to present significance and value of slopes of diet-specific correlations
2024-06-17	MicroCH_SupplTables_202406117_workPK.xlsx
	no changes in data
	rearrangement of the order of colums in some sheets, added background color for marking some phyla and genera - to make easier combining info from different sheets to the text of manuscript
	those formating to be removed from published version (there is no legend for the marks - they are just ad hoc marks for PK use)
2024-06-17	MicroCH_SupplTables_202406117.xlsx
	ML: added table TS12new - now data from TS12 and TS12a are in one table
	TS12 and TS12a are maintained, but only for temporary reference - to be removed if PK makes sure everything he worked on in there iis present in TS12new
	appended description of TS12new to (hopefully) reflect information relevant to both TS12 and TS12a
	replaced adjP values for TS12:
	if in one of the Diet groups number there were less than 10 animals in which abundance of the given taxon was > 0, p value for general correlation, Diet*covariate interaction, and correlation with the Diet group as reference is not displayed
	only the p value and slope for Diet groups where number of non-zero individuals was equal or exxeded 10 is displayed, only those values were included in P adjustment
2024-06-17	MicroCH_SupplTables_202406117_newPK.xlsx
	PK: corrected ad-hoc formulas uesed in additional columns in TS4, showing p values from TS8 and TS9 (the formulas had file name inside, and insted of taking values from this file were linking to its older version; no effect on actual resu;ts)
	Table TS12new copied to ST12new2 and: corrected title/legend, and columns with results for SC reorganized. Removed old versions of TS12.
	To do the same in the remaining results in this table and in other similar tables: alwas sfirst estimated parameter, and then p value (as in tables TS10, 11).
	Summary of the table legends moved to separate sheet. TO DO: unify info in this summary legend with the legends shown with each table
2024-06-18	MicroCH_SupplTables_202406118.xlsx
	ML: created new TS12 and TS13, reordering columns to show first the slope, and then the corresponding p-value - one next to another
	reordered variables presented in tables TS4-TS11 to put Diet first and covariates last
2024-06-19	MicroCH_SupplTables_202406119.xlsx
	ML: ? No info on changes
2024-07-02	MicroCH_SupplTables_20240702.xlsx
	replaced LM and ACO Correlation results with one correcting P values only for taxa with prevalence >10% within cage type and diet combination
	replaced IR with IRTax, referring to the record in TS3, in all other tables where taxa are listed in rows (TS4, TS8-TS13)
	removed IR column from tables not listing taxa: TS5, TS6, TS7
	merged TS5 and TS6 together into new TS5 table presenting both LSM and p values
	renumbered tables from TS6 onward
2024-07-02	MicroCH_SupplTables_v2_20240703.xlsx
	Version created by PK bazed unintentionally on intermediate version of the file eduted by ML. ERAZE ALL COPIES
2024-07-03	MicroCH_SupplTables_v3_20240703.xlsx
	renumbered tables also in table headers - in previous versions only sheet names and Tables_Legend were renumbered
	renamed columns "IRTax" to more compact "ITax"
2024-07-08	MicroCH_SupplTables_v3_20240708.xlsx
	Replaed table descriptions in tables-legend with shortened descriptions from table headers
	In TS4, replaced Prevalence columns with ones divided by diet and line type within the Ci-free group
	In TS4, reduced the max number of digits of mean±SD from 0.00000 to 0.0000
	corrected several cases of non-uniform labelling of NASV
	centered the "±" values
	removed the here-unnecessary columns with IR_Tax, Tax_lavel and Tax_full, and rows with model element labels
	PK - re-instated column with prevalnce for all Ci-free in TS4
	ML - in TS5, reordered columns presenting groups of T*T_coh to CC, CH, HC, HH (checked in files with formulas, it was the column order and not mislabelled headers)
	PK - in tabe TS4 - corected headers to make it separate colums of related values.
2024-07-17	PK makes final small dormatting corrections

## Sheet: Tables_Legend
Supplementary Tables (S1-S12) to:
Experimental evolution of a mammalian holobiont: stability of the distinct microbiome composition in bank voles selected for herbivorous capability
Małgorzata M. Lipowska, Edyta T. Sadowska, Kevin D. Kohl, Paweł Koteja
Legend for spreadsheets = supplementary taales
Names of sheets	Explanation
TS1_N_indiv	The number of individuals in the subgroups of the voles at subsequent stages of the experiement
	and number of observations used in particualr data analyses (after excluding flawed data and outliers)
TS2_ASV_by_Taxon	Summary of the number of amplicon sequence variants (NASV) and number of identified taxa at different taxonomic levels.
TS3_Taxonomy	Summary of the taxons found in the caecal samples of bank voles
	taxonomy, number of amplicon sequence variants (NASV) contributing to the taxon described at each level, its prevalence (% of individuals where it was detected) and mean relative abundance (% of reads)
	in animals from groups determined by presence of [Clostridium] innocuum group (Ci)
TS4_RelAbund_Mean_SD	Prevalence (fraction of individuals where a taxon was detected) and mean ± SD relative abundance (% reads) of bacterial phyla and genera in bank vole caecal samples.
	The values are calculated separately for groups determined by presence of Ci, and within groups determined by categorical factors used in statistical models.
	Only genera present in at least 10% of the Ci-free group animals are shown.
TS5_ANCOVA_Pval_LSM_95CI	Results of ANCOVA models and adjusted least squares means (LSM) ± 95% confidence half-intervals (CI)
	of body mass at day 0 of the feeding trial, body mass change during the trial (MDFT), alpha diversity metrics: number of ASV (NASV), Shannon diversity index and Pielou evenness index,
	and the rate of food consumption (FC) or digestion (FD), and apparent digestive efficiency (ADE).
TS6_UniFrac_Pval	Results of PERMANOVA models for unweighted and weighed UniFrac beta-diversity distances:
	p-values of the main factors (indiv. = focal individual; coh. = cohabitatnt), interactions and covariates included in the final models.
TS7_Phylum_RelAbund_Pval	Prevalence, mean relative abundance, and results of a univariate nonparametric ANOVA of the relative abundance of 11 bacterial phyla (all with prevalence > 10%):
	p-values (adjusted for the test multiplicity) of the main factors, interactions and covariates included in the final models.
TS8_Genus_RelAbund_Pval	Prevalence, mean relative abundance, and results of a univariate nonparametric ANOVA of the relative abundance of 115 bacterial genera (all with prevalence > 10%):
	p-values (adjusted for the test multiplicity) of the main factors, interactions and covariates included in the final models.
TS9_Phylum_AbsAbund_LCF_P	Prevalence, mean relative abundance, and results of ANCOMBC2 analyses of bias-corrected "absolute" abundance of 11 bacterial phyla (all with prevalence >10%):
	log fold-change (LFC) ± standard error (SE) and adjusted p-values of the main factors, interactions and covariates included in the models.
TS10_Genus_AbsAbund_LCF_P	Prevalence, mean relative abundance, and results of ANCOMBC2 analyses of bias-corrected "absolute" abundance of 115 bacterial genera (all with prevalence >10%):
	log fold-change (LFC) ± standard error (SE) and adjusted p-values of the main factors, interactions and covariates included in the models.
TS11_Corr_Alpha_RelAbund	Results of analysis of correlation between physiological performance traits (MDFT, FC, AD, FD) and microbial characteristics (NASV, Shannon index, Pielou index, and relative abundances of the main phyla or genera).
TS12_Corr_AbsAbund	Results of analysis of correlation between physiological performance traits (MDFT, FC, AD, FD) and absolute abundances of the main phyla or genera, calculated with ANCOM-BC2 models.

## Sheet: TS1_N_indiv
TS1. The number of individuals in the subgroups of the voles at subsequent stages of the experiement and number of observations used in particualr data analyses (after excluding flawed data and outliers).
			Combinations of the focal individual's and cohabitant's linetypes (C - control lines; H - "herbivorous" selected lines)
	Stage of experiment or analyses	Total n	individual C cohabited with C				individual C cohabited with H				individual H cohabited with C				individual H cohabited with H
	Cohabitation - pairs	414	89				229								96
	Cohabitation - individuals	828	178				229				229				192
	Separation	823	178				228				227				190
			Combinations of cage type (SC - standard cage; IVC - metabolic, individually ventilated) and food type (SD - standard diet; LQD - low-quality diet)
			SC×SD	SC×LQD	IVC×SD	IVC×LQD	SC×SD	SC×LQD	IVC×SD	IVC×LQD	SC×SD	SC×LQD	IVC×SD	IVC×LQD	SC×SD	SC×LQD	IVC×SD	IVC×LQD
Feeding trial performance
	Start of feeding trial (day 0 on Fig. 1)	823	41	48	44	45	64	59	50	55	51	54	58	64	46	49	49	46
	Individuals excluded for technical reasons	51			3				3	4			9	14			9	9
	Poor health	5									1				1		2	1
	Died during the trials	20	1	7				9		1		1				1
	Completed feeding trials	747	40	41	41	45	64	50	47	50	50	53	49	50	45	48	38	36
	Microbial DNA extracted	745	40	41	41	45	64	49	47	50	50	53	49	50	44	48	38	36
	Analyses of body mass changes	742	40	41	41	45	64	48	47	50	50	52	49	50	44	48	38	35
	Analyses of food consumption	351			41	45			47	50			46	50			36	36
	Analyses of alpha-diversity traits	739	39	41	39	45	63	49	47	50	50	52	49	50	44	47	38	36
Molecular analyses of microbiomes
	All individuals with available data	745	40	41	41	45	64	49	47	50	50	53	49	50	44	48	38	36
	Individuals in the Ci-present group	55	2		5	5	13	2	4	5	3		2	3	4	1	3	3
	Individuals in the Ci-free group	690	38	41	36	40	51	47	43	45	47	53	47	47	40	47	35	33
	Analyses of alpha-diversity traits in Ci-free group	685	37	41	34	40	51	47	43	45	47	52	47	47	40	46	35	33

## Sheet: TS2_ASV_by_Taxon
TS2. Summary of the number of amplicon sequence variants (NASV) and number of identified taxa at different taxonomic levels.
	Phylum		Class		Order		Family		Genus		Species
	Phyla	NASV	Classes	NASV	Orders	NASV	Families	NASV	Genera	NASV	Species	NASV
named	12	5228	18	5227	44	5199	70	5130	143	3303	20	42
classification pending	0	0	0	0	0	0	2	17	12	96	0	0
uncultured	0	0	0	0	0	0	2	25	13	1260	121	4019
total classified	12	5228	18	5227	44	5199	74	5172	168	4659	141	4061
unclassified		2		1		28		27		513		598
grand total		5230		5228		5227		5199		5172		4659

## Sheet: TS3_Taxonomy
TS3. Summary of the taxons found in the caecal samples of bank voles: taxonomy, number of amplicon sequence variants (NASV) contributing to the taxon described at each level, its prevalence (% of individuals where it was detected) and mean relative abundance (% of reads) in animals from groups determined by presence of [Clostridium] innocuum group (Ci).
											Ci-free			Ci-present (55 individuals)
ITax	Taxonomic level	Phylum	Class	Order	Family	Genus	Species		NASV		prevalence (% indiv.)	mean abundance (%)		prevalence (% indiv.)	mean abundance (%)
1	Phylum	Firmicutes							4229		100	50.2128		100	34.3728
2	Phylum	Bacteroidota							484		100	27.0779		100	41.275
3	Phylum	Desulfobacterota							185		100	9.04216		100	6.30694
4	Phylum	Spirochaetota							20		96.6667	4.51985		50.9091	0.0610831
5	Phylum	Campilobacterota							4		86.2319	2.95153		98.1818	6.79124
6	Phylum	Proteobacteria							63		100	2.87132		100	4.37036
7	Phylum	Deferribacterota							19		93.7681	1.57695		74.5455	0.713202
8	Phylum	Verrucomicrobiota							12		93.7681	1.04153		80	0.763377
9	Phylum	Actinobacteriota							130		100	0.48104		98.1818	1.50381
10	Phylum	Cyanobacteria							48		91.5942	0.188343		92.7273	1.20815
11	Phylum	Patescibacteria							33		81.4493	0.0365724		1.81818	0.000263033
12	Phylum	__							2		0.434783	5.85399e-05		1.81818	0.000114455
13	Phylum	Fusobacteriota							1		0	0		32.7273	2.6336
14	Class	Firmicutes	Clostridia						3939		100	43.0946		100	26.5051
15	Class	Firmicutes	Bacilli						285		100	6.98713		100	7.17825
16	Class	Firmicutes	Negativicutes						3		18.4058	0.122881		58.1818	0.689454
17	Class	Firmicutes	Syntrophomonadia						2		31.0145	0.00814898		0	0
18	Class	Bacteroidota	Bacteroidia						484		100	27.0779		100	41.275
19	Class	Desulfobacterota	Desulfovibrionia						185		100	9.04216		100	6.30694
20	Class	Spirochaetota	Spirochaetia						17		76.087	4.49346		7.27273	0.0514385
21	Class	Spirochaetota	Brachyspirae						3		81.7391	0.026385		45.4545	0.00964456
22	Class	Campilobacterota	Campylobacteria						4		86.2319	2.95153		98.1818	6.79124
23	Class	Proteobacteria	Alphaproteobacteria						36		100	2.54529		98.1818	2.50415
24	Class	Proteobacteria	Gammaproteobacteria						27		98.8406	0.326025		100	1.86621
25	Class	Deferribacterota	Deferribacteres						19		93.7681	1.57695		74.5455	0.713202
26	Class	Verrucomicrobiota	Verrucomicrobiae						11		93.7681	1.04148		80	0.763377
27	Class	Verrucomicrobiota	__						1		0.57971	4.71072e-05		0	0
28	Class	Actinobacteriota	Coriobacteriia						120		100	0.361691		80	0.065091
29	Class	Actinobacteriota	Actinobacteria						10		73.0435	0.119349		83.6364	1.43872
30	Class	Cyanobacteria	Vampirivibrionia						48		91.5942	0.188343		92.7273	1.20815
31	Class	Patescibacteria	Saccharimonadia						33		81.4493	0.0365724		1.81818	0.000263033
32	Class	__	__						2		0.434783	5.85399e-05		1.81818	0.000114455
33	Class	Fusobacteriota	Fusobacteriia						1		0	0		32.7273	2.6336
34	Order	Firmicutes	Clostridia	Lachnospirales					2186		100	23.6533		100	23.0033
35	Order	Firmicutes	Clostridia	Oscillospirales					1160		100	11.3179		100	3.17527
36	Order	Firmicutes	Clostridia	Christensenellales					56		94.3478	4.53681		30.9091	0.00614522
37	Order	Firmicutes	Clostridia	Clostridia_vadinBB60_group					299		100	2.47932		34.5455	0.263169
38	Order	Firmicutes	Clostridia	Peptococcales					44		99.5652	0.573328		3.63636	0.00728575
39	Order	Firmicutes	Clostridia	Peptostreptococcales-Tissierellales					51		97.971	0.190381		20	0.0231715
40	Order	Firmicutes	Clostridia	Monoglobales					5		32.8986	0.186232		0	0
41	Order	Firmicutes	Clostridia	__					28		87.2464	0.0536834		3.63636	0.00368817
42	Order	Firmicutes	Clostridia	Clostridia_UCG-014					103		81.8841	0.0489002		1.81818	9.74426e-05
43	Order	Firmicutes	Clostridia	Clostridiales					3		14.7826	0.0534368		5.45455	0.0162864
44	Order	Firmicutes	Clostridia	Eubacteriales					2		11.7391	0.0011016		27.2727	0.00667957
45	Order	Firmicutes	Clostridia	Clostridia					2		2.17391	0.000169168		0	0
46	Order	Firmicutes	Bacilli	Lactobacillales					89		97.8261	5.0431		100	6.2236
47	Order	Firmicutes	Bacilli	Erysipelotrichales					35		43.1884	1.37811		94.5455	0.92002
48	Order	Firmicutes	Bacilli	Acholeplasmatales					2		49.5652	0.478316		0	0
49	Order	Firmicutes	Bacilli	RF39					138		85.5072	0.0742875		0	0
50	Order	Firmicutes	Bacilli	Mycoplasmatales					4		13.0435	0.0107035		23.6364	0.0321152
51	Order	Firmicutes	Bacilli	Staphylococcales					9		6.95652	0.0014721		14.5455	0.002307
52	Order	Firmicutes	Bacilli	Bacillales					5		4.05797	0.000633984		1.81818	9.80733e-05
53	Order	Firmicutes	Bacilli	Thermoactinomycetales					3		4.92754	0.0004991		1.81818	0.000109588
54	Order	Firmicutes	Negativicutes	Veillonellales-Selenomonadales					3		18.4058	0.122881		58.1818	0.689454
55	Order	Firmicutes	Syntrophomonadia	Syntrophomonadales					2		31.0145	0.00814898		0	0
56	Order	Bacteroidota	Bacteroidia	Bacteroidales					484		100	27.0779		100	41.275
57	Order	Desulfobacterota	Desulfovibrionia	Desulfovibrionales					185		100	9.04216		100	6.30694
58	Order	Spirochaetota	Spirochaetia	Spirochaetales					17		76.087	4.49346		7.27273	0.0514385
59	Order	Spirochaetota	Brachyspirae	Brachyspirales					3		81.7391	0.026385		45.4545	0.00964456
60	Order	Campilobacterota	Campylobacteria	Campylobacterales					4		86.2319	2.95153		98.1818	6.79124
61	Order	Proteobacteria	Alphaproteobacteria	Rickettsiales					18		100	1.86826		94.5455	1.53317
62	Order	Proteobacteria	Alphaproteobacteria	Paracaedibacterales					9		89.7101	0.637535		92.7273	0.529123
63	Order	Proteobacteria	Alphaproteobacteria	Rhizobiales					2		16.5217	0.025755		1.81818	0.00654046
64	Order	Proteobacteria	Alphaproteobacteria	Rhodospirillales					7		35.7971	0.0137433		78.1818	0.435315
65	Order	Proteobacteria	Gammaproteobacteria	Cellvibrionales					1		40.5797	0.213739		45.4545	0.237701
66	Order	Proteobacteria	Gammaproteobacteria	Burkholderiales					13		97.1014	0.106573		100	1.57231
67	Order	Proteobacteria	Gammaproteobacteria	Pasteurellales					9		30.1449	0.00499862		30.9091	0.0128644
68	Order	Proteobacteria	Gammaproteobacteria	Pseudomonadales					3		2.46377	0.00070286		1.81818	0.000271626
69	Order	Proteobacteria	Gammaproteobacteria	Enterobacterales					1		0.144928	1.12933e-05		1.81818	0.0430683
70	Order	Deferribacterota	Deferribacteres	Deferribacterales					19		93.7681	1.57695		74.5455	0.713202
71	Order	Verrucomicrobiota	Verrucomicrobiae	Opitutales					11		93.7681	1.04148		80	0.763377
72	Order	Verrucomicrobiota	__	__					1		0.57971	4.71072e-05		0	0
73	Order	Actinobacteriota	Coriobacteriia	Coriobacteriales					120		100	0.361691		80	0.065091
74	Order	Actinobacteriota	Actinobacteria	Bifidobacteriales					2		11.7391	0.100277		50.9091	1.42163
75	Order	Actinobacteriota	Actinobacteria	Corynebacteriales					4		58.8406	0.0162994		65.4545	0.0159543
76	Order	Actinobacteriota	Actinobacteria	Micrococcales					4		27.1014	0.002773		14.5455	0.00113861
77	Order	Cyanobacteria	Vampirivibrionia	Gastranaerophilales					48		91.5942	0.188343		92.7273	1.20815
78	Order	Patescibacteria	Saccharimonadia	Saccharimonadales					33		81.4493	0.0365724		1.81818	0.000263033
79	Order	__	__	__					2		0.434783	5.85399e-05		1.81818	0.000114455
80	Order	Fusobacteriota	Fusobacteriia	Fusobacteriales					1		0	0		32.7273	2.6336
81	Family	Firmicutes	Clostridia	Lachnospirales	Lachnospiraceae				2186		100	23.6533		100	23.0033
82	Family	Firmicutes	Clostridia	Oscillospirales	Oscillospiraceae				606		100	5.61847		50.9091	1.5779
83	Family	Firmicutes	Clostridia	Oscillospirales	Ruminococcaceae				469		100	5.34009		100	1.51473
84	Family	Firmicutes	Clostridia	Oscillospirales	Butyricicoccaceae				42		99.5652	0.248613		3.63636	0.00748251
85	Family	Firmicutes	Clostridia	Oscillospirales	[Eubacterium]_coprostanoligenes_group				15		68.8406	0.0660359		23.6364	0.0427035
86	Family	Firmicutes	Clostridia	Oscillospirales	UCG-010				8		65.942	0.0325431		5.45455	0.000968203
87	Family	Firmicutes	Clostridia	Oscillospirales	[Clostridium]_methylpentosum_group				2		4.34783	0.00984156		0	0
88	Family	Firmicutes	Clostridia	Oscillospirales	__				16		19.4203	0.00205434		74.5455	0.0314815
89	Family	Firmicutes	Clostridia	Oscillospirales	Oscillospirales				2		3.62319	0.000289611		0	0
90	Family	Firmicutes	Clostridia	Christensenellales	Christensenellaceae				56		94.3478	4.53681		30.9091	0.00614522
91	Family	Firmicutes	Clostridia	Clostridia_vadinBB60_group	Clostridia_vadinBB60_group				299		100	2.47932		34.5455	0.263169
92	Family	Firmicutes	Clostridia	Peptococcales	Peptococcaceae				44		99.5652	0.573328		3.63636	0.00728575
93	Family	Firmicutes	Clostridia	Peptostreptococcales-Tissierellales	Anaerovoracaceae				50		97.971	0.190358		20	0.0231715
94	Family	Firmicutes	Clostridia	Peptostreptococcales-Tissierellales	Peptostreptococcales-Tissierellales				1		0.57971	2.32141e-05		0	0
95	Family	Firmicutes	Clostridia	Monoglobales	Monoglobaceae				5		32.8986	0.186232		0	0
96	Family	Firmicutes	Clostridia	__	__				28		87.2464	0.0536834		3.63636	0.00368817
97	Family	Firmicutes	Clostridia	Clostridia_UCG-014	Clostridia_UCG-014				103		81.8841	0.0489002		1.81818	9.74426e-05
98	Family	Firmicutes	Clostridia	Clostridiales	Clostridiaceae				3		14.7826	0.0534368		5.45455	0.0162864
99	Family	Firmicutes	Clostridia	Eubacteriales	Anaerofustaceae				2		11.7391	0.0011016		27.2727	0.00667957
100	Family	Firmicutes	Clostridia	Clostridia	Gracilibacteraceae				2		2.17391	0.000169168		0	0
101	Family	Firmicutes	Bacilli	Lactobacillales	Lactobacillaceae				66		95.2174	5.02719		98.1818	6.1882
102	Family	Firmicutes	Bacilli	Lactobacillales	Streptococcaceae				14		55.7971	0.0120648		45.4545	0.00975538
103	Family	Firmicutes	Bacilli	Lactobacillales	Aerococcaceae				4		10.1449	0.00364008		5.45455	0.000639612
104	Family	Firmicutes	Bacilli	Lactobacillales	Carnobacteriaceae				3		1.73913	0.000208237		0	0
105	Family	Firmicutes	Bacilli	Lactobacillales	Enterococcaceae				2		0	0		18.1818	0.0250086
106	Family	Firmicutes	Bacilli	Erysipelotrichales	Erysipelotrichaceae				32		42.3188	1.37741		94.5455	0.850112
107	Family	Firmicutes	Bacilli	Erysipelotrichales	Erysipelatoclostridiaceae				3		2.02899	0.000703034		20	0.069908
108	Family	Firmicutes	Bacilli	Acholeplasmatales	Acholeplasmataceae				2		49.5652	0.478316		0	0
109	Family	Firmicutes	Bacilli	RF39	RF39				138		85.5072	0.0742875		0	0
110	Family	Firmicutes	Bacilli	Mycoplasmatales	Mycoplasmataceae				4		13.0435	0.0107035		23.6364	0.0321152
111	Family	Firmicutes	Bacilli	Staphylococcales	Staphylococcaceae				9		6.95652	0.0014721		14.5455	0.002307
112	Family	Firmicutes	Bacilli	Bacillales	Planococcaceae				3		2.75362	0.000342659		1.81818	9.80733e-05
113	Family	Firmicutes	Bacilli	Bacillales	Bacillaceae				2		1.88406	0.000291325		0	0
114	Family	Firmicutes	Bacilli	Thermoactinomycetales	Thermoactinomycetaceae				3		4.92754	0.0004991		1.81818	0.000109588
115	Family	Firmicutes	Negativicutes	Veillonellales-Selenomonadales	Selenomonadaceae				2		18.2609	0.122864		52.7273	0.675058
116	Family	Firmicutes	Negativicutes	Veillonellales-Selenomonadales	Veillonellaceae				1		0.289855	1.72633e-05		5.45455	0.0143961
117	Family	Firmicutes	Syntrophomonadia	Syntrophomonadales	Syntrophomonadaceae				2		31.0145	0.00814898		0	0
118	Family	Bacteroidota	Bacteroidia	Bacteroidales	Muribaculaceae				407		100	16.5451		100	38.498
119	Family	Bacteroidota	Bacteroidia	Bacteroidales	Rikenellaceae				33		100	3.78438		58.1818	0.520807
120	Family	Bacteroidota	Bacteroidia	Bacteroidales	Rs-E47_termite_group				17		75.7971	3.51645		38.1818	0.412877
121	Family	Bacteroidota	Bacteroidia	Bacteroidales	Marinifilaceae				14		97.1014	1.76688		7.27273	0.0179038
122	Family	Bacteroidota	Bacteroidia	Bacteroidales	__				6		66.8116	1.46489		0	0
123	Family	Bacteroidota	Bacteroidia	Bacteroidales	F082				4		1.88406	0.000155204		0	0
124	Family	Bacteroidota	Bacteroidia	Bacteroidales	Bacteroidaceae				3		0.434783	5.52615e-05		54.5455	1.8254
125	Family	Desulfobacterota	Desulfovibrionia	Desulfovibrionales	Desulfovibrionaceae				179		100	8.53128		100	6.18344
126	Family	Desulfobacterota	Desulfovibrionia	Desulfovibrionales	__				5		92.029	0.510834		54.5455	0.123499
127	Family	Desulfobacterota	Desulfovibrionia	Desulfovibrionales	Desulfomicrobiaceae				1		0.869565	4.55682e-05		0	0
128	Family	Spirochaetota	Spirochaetia	Spirochaetales	Spirochaetaceae				17		76.087	4.49346		7.27273	0.0514385
129	Family	Spirochaetota	Brachyspirae	Brachyspirales	Brachyspiraceae				3		81.7391	0.026385		45.4545	0.00964456
130	Family	Campilobacterota	Campylobacteria	Campylobacterales	Helicobacteraceae				4		86.2319	2.95153		98.1818	6.79124
131	Family	Proteobacteria	Alphaproteobacteria	Rickettsiales	uncultured				18		100	1.86826		94.5455	1.53317
132	Family	Proteobacteria	Alphaproteobacteria	Paracaedibacterales	Paracaedibacteraceae				9		89.7101	0.637535		92.7273	0.529123
133	Family	Proteobacteria	Alphaproteobacteria	Rhizobiales	Rhizobiales_Incertae_Sedis				2		16.5217	0.025755		1.81818	0.00654046
134	Family	Proteobacteria	Alphaproteobacteria	Rhodospirillales	uncultured				7		35.7971	0.0137433		78.1818	0.435315
135	Family	Proteobacteria	Gammaproteobacteria	Cellvibrionales	Cellvibrionaceae				1		40.5797	0.213739		45.4545	0.237701
136	Family	Proteobacteria	Gammaproteobacteria	Burkholderiales	Oxalobacteraceae				4		91.4493	0.0812345		54.5455	0.0336872
137	Family	Proteobacteria	Gammaproteobacteria	Burkholderiales	Nitrosomonadaceae				5		84.2029	0.022681		90.9091	0.0270194
138	Family	Proteobacteria	Gammaproteobacteria	Burkholderiales	Sutterellaceae				2		2.17391	0.00180013		92.7273	1.51154
139	Family	Proteobacteria	Gammaproteobacteria	Burkholderiales	Methylophilaceae				1		5.65217	0.000680586		1.81818	5.5982e-05
140	Family	Proteobacteria	Gammaproteobacteria	Burkholderiales	Alcaligenaceae				1		0.57971	0.000177244		0	0
141	Family	Proteobacteria	Gammaproteobacteria	Pasteurellales	Pasteurellaceae				9		30.1449	0.00499862		30.9091	0.0128644
142	Family	Proteobacteria	Gammaproteobacteria	Pseudomonadales	Moraxellaceae				3		2.46377	0.00070286		1.81818	0.000271626
143	Family	Proteobacteria	Gammaproteobacteria	Enterobacterales	Enterobacteriaceae				1		0.144928	1.12933e-05		1.81818	0.0430683
144	Family	Deferribacterota	Deferribacteres	Deferribacterales	Deferribacteraceae				19		93.7681	1.57695		74.5455	0.713202
145	Family	Verrucomicrobiota	Verrucomicrobiae	Opitutales	Puniceicoccaceae				11		93.7681	1.04148		80	0.763377
146	Family	Verrucomicrobiota	__	__	__				1		0.57971	4.71072e-05		0	0
147	Family	Actinobacteriota	Coriobacteriia	Coriobacteriales	Eggerthellaceae				117		99.8551	0.33012		80	0.065091
148	Family	Actinobacteriota	Coriobacteriia	Coriobacteriales	Coriobacteriales_Incertae_Sedis				3		32.1739	0.0315706		0	0
149	Family	Actinobacteriota	Actinobacteria	Bifidobacteriales	Bifidobacteriaceae				2		11.7391	0.100277		50.9091	1.42163
150	Family	Actinobacteriota	Actinobacteria	Corynebacteriales	Corynebacteriaceae				4		58.8406	0.0162994		65.4545	0.0159543
151	Family	Actinobacteriota	Actinobacteria	Micrococcales	Dermabacteraceae				1		17.6812	0.00161445		7.27273	0.000378657
152	Family	Actinobacteriota	Actinobacteria	Micrococcales	Micrococcaceae				1		11.1594	0.000994677		9.09091	0.000759957
153	Family	Actinobacteriota	Actinobacteria	Micrococcales	Microbacteriaceae				1		0.289855	0.000104152		0	0
154	Family	Actinobacteriota	Actinobacteria	Micrococcales	Brevibacteriaceae				1		0.289855	5.97188e-05		0	0
155	Family	Cyanobacteria	Vampirivibrionia	Gastranaerophilales	Gastranaerophilales				48		91.5942	0.188343		92.7273	1.20815
156	Family	Patescibacteria	Saccharimonadia	Saccharimonadales	Saccharimonadaceae				33		81.4493	0.0365724		1.81818	0.000263033
157	Family	__	__	__	__				2		0.434783	5.85399e-05		1.81818	0.000114455
158	Family	Fusobacteriota	Fusobacteriia	Fusobacteriales	Fusobacteriaceae				1		0	0		32.7273	2.6336
159	Genus	Firmicutes	Clostridia	Lachnospirales	Lachnospiraceae	Lachnospiraceae_NK4A136_group			456		100	8.29364		32.7273	1.24932
160	Genus	Firmicutes	Clostridia	Lachnospirales	Lachnospiraceae	uncultured			614		100	4.43076		52.7273	1.39954
161	Genus	Firmicutes	Clostridia	Lachnospirales	Lachnospiraceae	__			363		100	2.34876		100	13.7735
162	Genus	Firmicutes	Clostridia	Lachnospirales	Lachnospiraceae	Roseburia			208		99.8551	2.3201		69.0909	0.509753
163	Genus	Firmicutes	Clostridia	Lachnospirales	Lachnospiraceae	Lachnospiraceae_UCG-001			80		98.5507	1.54902		52.7273	0.117398
164	Genus	Firmicutes	Clostridia	Lachnospirales	Lachnospiraceae	Blautia			70		98.8406	0.690091		83.6364	2.78873
165	Genus	Firmicutes	Clostridia	Lachnospirales	Lachnospiraceae	Lachnoclostridium			78		100	0.528265		90.9091	2.38342
166	Genus	Firmicutes	Clostridia	Lachnospirales	Lachnospiraceae	A2			22		93.4783	0.496509		1.81818	0.00558945
167	Genus	Firmicutes	Clostridia	Lachnospirales	Lachnospiraceae	[Eubacterium]_xylanophilum_group			15		97.3913	0.480445		0	0
168	Genus	Firmicutes	Clostridia	Lachnospirales	Lachnospiraceae	Lachnospiraceae_UCG-006			37		99.4203	0.414804		50.9091	0.581587
169	Genus	Firmicutes	Clostridia	Lachnospirales	Lachnospiraceae	Tyzzerella			50		97.1014	0.409301		3.63636	0.00444581
170	Genus	Firmicutes	Clostridia	Lachnospirales	Lachnospiraceae	ASF356			11		86.9565	0.335533		3.63636	0.0473056
171	Genus	Firmicutes	Clostridia	Lachnospirales	Lachnospiraceae	Coprococcus			3		22.1739	0.304942		0	0
172	Genus	Firmicutes	Clostridia	Lachnospirales	Lachnospiraceae	Acetatifactor			12		80.2899	0.258671		1.81818	0.000657582
173	Genus	Firmicutes	Clostridia	Lachnospirales	Lachnospiraceae	GCA-900066575			54		95.942	0.20374		1.81818	0.00108501
174	Genus	Firmicutes	Clostridia	Lachnospirales	Lachnospiraceae	Lachnospiraceae_NK4B4_group			22		83.4783	0.151285		0	0
175	Genus	Firmicutes	Clostridia	Lachnospirales	Lachnospiraceae	Lachnospira			5		62.4638	0.0962051		3.63636	0.00629332
176	Genus	Firmicutes	Clostridia	Lachnospirales	Lachnospiraceae	Tuzzerella			4		92.3188	0.0852251		0	0
177	Genus	Firmicutes	Clostridia	Lachnospirales	Lachnospiraceae	Lachnospiraceae_FCS020_group			20		89.1304	0.0820786		1.81818	0.00253169
178	Genus	Firmicutes	Clostridia	Lachnospirales	Lachnospiraceae	Acetitomaculum			18		73.0435	0.0550576		1.81818	0.00156971
179	Genus	Firmicutes	Clostridia	Lachnospirales	Lachnospiraceae	Oribacterium			2		65.0725	0.0434651		0	0
180	Genus	Firmicutes	Clostridia	Lachnospirales	Lachnospiraceae	Lachnospiraceae_AC2044_group			4		70.1449	0.0220505		0	0
181	Genus	Firmicutes	Clostridia	Lachnospirales	Lachnospiraceae	[Ruminococcus]_gauvreauii_group			3		22.3188	0.0119008		0	0
182	Genus	Firmicutes	Clostridia	Lachnospirales	Lachnospiraceae	[Ruminococcus]_torques_group			3		32.4638	0.0111025		0	0
183	Genus	Firmicutes	Clostridia	Lachnospirales	Lachnospiraceae	[Eubacterium]_ruminantium_group			1		3.62319	0.00931624		1.81818	0.0201002
184	Genus	Firmicutes	Clostridia	Lachnospirales	Lachnospiraceae	Eisenbergiella			5		49.4203	0.0099553		0	0
185	Genus	Firmicutes	Clostridia	Lachnospirales	Lachnospiraceae	Anaerosporobacter			1		4.34783	0.00450485		0	0
186	Genus	Firmicutes	Clostridia	Lachnospirales	Lachnospiraceae	Lachnospiraceae_UCG-010			4		21.3043	0.00248554		1.81818	0.00101925
187	Genus	Firmicutes	Clostridia	Lachnospirales	Lachnospiraceae	[Eubacterium]_fissicatena_group			1		22.3188	0.00231322		0	0
188	Genus	Firmicutes	Clostridia	Lachnospirales	Lachnospiraceae	[Eubacterium]_oxidoreducens_group			10		8.4058	0.000802974		1.81818	0.000151853
189	Genus	Firmicutes	Clostridia	Lachnospirales	Lachnospiraceae	Dorea			3		3.91304	0.00035917		0	0
190	Genus	Firmicutes	Clostridia	Lachnospirales	Lachnospiraceae	Anaerostignum			1		3.47826	0.000294786		0	0
191	Genus	Firmicutes	Clostridia	Lachnospirales	Lachnospiraceae	Marvinbryantia			1		2.46377	0.000197756		0	0
192	Genus	Firmicutes	Clostridia	Lachnospirales	Lachnospiraceae	Lachnospiraceae_NK3A20_group			2		1.44928	6.90133e-05		0	0
193	Genus	Firmicutes	Clostridia	Lachnospirales	Lachnospiraceae	Lachnospiraceae_UCG-009			1		0.434783	3.58391e-05		0	0
194	Genus	Firmicutes	Clostridia	Lachnospirales	Lachnospiraceae	Butyrivibrio			1		0.57971	3.35204e-05		0	0
195	Genus	Firmicutes	Clostridia	Lachnospirales	Lachnospiraceae	Anaerostipes			1		0	0		74.5455	0.109358
196	Genus	Firmicutes	Clostridia	Oscillospirales	Oscillospiraceae	uncultured			342		100	3.63169		49.0909	1.38002
197	Genus	Firmicutes	Clostridia	Oscillospirales	Oscillospiraceae	Colidextribacter			94		100	0.651082		34.5455	0.137757
198	Genus	Firmicutes	Clostridia	Oscillospirales	Oscillospiraceae	Oscillibacter			45		100	0.56281		7.27273	0.0546528
199	Genus	Firmicutes	Clostridia	Oscillospirales	Oscillospiraceae	UCG-005			32		96.5217	0.307713		0	0
200	Genus	Firmicutes	Clostridia	Oscillospirales	Oscillospiraceae	UCG-003			26		99.7101	0.214349		1.81818	0.00399783
201	Genus	Firmicutes	Clostridia	Oscillospirales	Oscillospiraceae	NK4A214_group			23		97.5362	0.179144		0	0
202	Genus	Firmicutes	Clostridia	Oscillospirales	Oscillospiraceae	__			35		77.8261	0.0340441		3.63636	0.00147605
203	Genus	Firmicutes	Clostridia	Oscillospirales	Oscillospiraceae	UCG-002			3		33.6232	0.0326473		0	0
204	Genus	Firmicutes	Clostridia	Oscillospirales	Oscillospiraceae	UCG-007			3		17.3913	0.00244349		0	0
205	Genus	Firmicutes	Clostridia	Oscillospirales	Oscillospiraceae	Flavonifractor			2		21.1594	0.00227192		0	0
206	Genus	Firmicutes	Clostridia	Oscillospirales	Oscillospiraceae	Oscillospira			1		2.89855	0.000280503		0	0
207	Genus	Firmicutes	Clostridia	Oscillospirales	Ruminococcaceae	uncultured			210		100	2.32366		80	0.513509
208	Genus	Firmicutes	Clostridia	Oscillospirales	Ruminococcaceae	Ruminococcus			9		77.2464	0.837614		3.63636	0.0357857
209	Genus	Firmicutes	Clostridia	Oscillospirales	Ruminococcaceae	Incertae_Sedis			117		100	0.642932		100	0.848027
210	Genus	Firmicutes	Clostridia	Oscillospirales	Ruminococcaceae	[Eubacterium]_siraeum_group			17		91.0145	0.634286		0	0
211	Genus	Firmicutes	Clostridia	Oscillospirales	Ruminococcaceae	UBA1819			35		99.1304	0.43276		5.45455	0.0257454
212	Genus	Firmicutes	Clostridia	Oscillospirales	Ruminococcaceae	Fournierella			11		81.3043	0.282825		1.81818	0.00227654
213	Genus	Firmicutes	Clostridia	Oscillospirales	Ruminococcaceae	Ruminococcaceae			10		70.5797	0.125615		0	0
214	Genus	Firmicutes	Clostridia	Oscillospirales	Ruminococcaceae	__			42		85.6522	0.0428775		3.63636	0.00450638
215	Genus	Firmicutes	Clostridia	Oscillospirales	Ruminococcaceae	Paludicola			5		44.6377	0.00609563		85.4545	0.0697392
216	Genus	Firmicutes	Clostridia	Oscillospirales	Ruminococcaceae	Anaerofilum			4		29.2754	0.00470569		0	0
217	Genus	Firmicutes	Clostridia	Oscillospirales	Ruminococcaceae	Anaerotruncus			7		34.3478	0.00435233		16.3636	0.0151407
218	Genus	Firmicutes	Clostridia	Oscillospirales	Ruminococcaceae	Candidatus_Soleaferrea			2		7.10145	0.00237416		0	0
219	Genus	Firmicutes	Clostridia	Oscillospirales	Butyricicoccaceae	Butyricicoccus			22		94.2029	0.125907		1.81818	0.00687173
220	Genus	Firmicutes	Clostridia	Oscillospirales	Butyricicoccaceae	UCG-009			20		95.7971	0.122707		1.81818	0.00061078
221	Genus	Firmicutes	Clostridia	Oscillospirales	[Eubacterium]_coprostanoligenes_group	[Eubacterium]_coprostanoligenes_group			15		68.8406	0.0660359		23.6364	0.0427035
222	Genus	Firmicutes	Clostridia	Oscillospirales	UCG-010	UCG-010			8		65.942	0.0325431		5.45455	0.000968203
223	Genus	Firmicutes	Clostridia	Oscillospirales	[Clostridium]_methylpentosum_group	[Clostridium]_methylpentosum_group			2		4.34783	0.00984156		0	0
224	Genus	Firmicutes	Clostridia	Oscillospirales	__	__			16		19.4203	0.00205434		74.5455	0.0314815
225	Genus	Firmicutes	Clostridia	Oscillospirales	Oscillospirales	Hydrogenoanaerobacterium			2		3.62319	0.000289611		0	0
226	Genus	Firmicutes	Clostridia	Christensenellales	Christensenellaceae	uncultured			19		83.4783	2.28488		27.2727	0.00389249
227	Genus	Firmicutes	Clostridia	Christensenellales	Christensenellaceae	__			30		85.2174	2.24722		5.45455	0.00191958
228	Genus	Firmicutes	Clostridia	Christensenellales	Christensenellaceae	Christensenella			5		35.942	0.00440311		1.81818	0.000333153
229	Genus	Firmicutes	Clostridia	Christensenellales	Christensenellaceae	Christensenellaceae_R-7_group			2		1.15942	0.000303781		0	0
230	Genus	Firmicutes	Clostridia	Clostridia_vadinBB60_group	Clostridia_vadinBB60_group	Clostridia_vadinBB60_group			299		100	2.47932		34.5455	0.263169
231	Genus	Firmicutes	Clostridia	Peptococcales	Peptococcaceae	uncultured			17		93.6232	0.465774		1.81818	0.00399783
232	Genus	Firmicutes	Clostridia	Peptococcales	Peptococcaceae	Peptococcus			27		95.0725	0.107553		1.81818	0.00328791
233	Genus	Firmicutes	Clostridia	Peptostreptococcales-Tissierellales	Anaerovoracaceae	Family_XIII_UCG-001			5		86.5217	0.0756518		0	0
234	Genus	Firmicutes	Clostridia	Peptostreptococcales-Tissierellales	Anaerovoracaceae	[Eubacterium]_brachy_group			21		95.6522	0.067052		7.27273	0.0110236
235	Genus	Firmicutes	Clostridia	Peptostreptococcales-Tissierellales	Anaerovoracaceae	Family_XIII_AD3011_group			13		77.8261	0.0396454		1.81818	0.000313433
236	Genus	Firmicutes	Clostridia	Peptostreptococcales-Tissierellales	Anaerovoracaceae	__			5		23.6232	0.00502402		0	0
237	Genus	Firmicutes	Clostridia	Peptostreptococcales-Tissierellales	Anaerovoracaceae	Anaerovorax			4		22.6087	0.00224834		1.81818	0.00193987
238	Genus	Firmicutes	Clostridia	Peptostreptococcales-Tissierellales	Anaerovoracaceae	[Eubacterium]_nodatum_group			2		6.52174	0.000736118		16.3636	0.00989464
239	Genus	Firmicutes	Clostridia	Peptostreptococcales-Tissierellales	Peptostreptococcales-Tissierellales	Anoxynatronum			1		0.57971	2.32141e-05		0	0
240	Genus	Firmicutes	Clostridia	Monoglobales	Monoglobaceae	Monoglobus			5		32.8986	0.186232		0	0
241	Genus	Firmicutes	Clostridia	__	__	__			28		87.2464	0.0536834		3.63636	0.00368817
242	Genus	Firmicutes	Clostridia	Clostridia_UCG-014	Clostridia_UCG-014	Clostridia_UCG-014			103		81.8841	0.0489002		1.81818	9.74426e-05
243	Genus	Firmicutes	Clostridia	Clostridiales	Clostridiaceae	Candidatus_Arthromitus			2		14.7826	0.0534368		3.63636	0.0153057
244	Genus	Firmicutes	Clostridia	Clostridiales	Clostridiaceae	Clostridium_sensu_stricto_1			1		0	0		1.81818	0.000980733
245	Genus	Firmicutes	Clostridia	Eubacteriales	Anaerofustaceae	Anaerofustis			2		11.7391	0.0011016		27.2727	0.00667957
246	Genus	Firmicutes	Clostridia	Clostridia	Gracilibacteraceae	__			2		2.17391	0.000169168		0	0
247	Genus	Firmicutes	Bacilli	Lactobacillales	Lactobacillaceae	Lactobacillus			66		95.2174	5.02719		98.1818	6.1882
248	Genus	Firmicutes	Bacilli	Lactobacillales	Streptococcaceae	Streptococcus			14		55.7971	0.0120648		45.4545	0.00975538
249	Genus	Firmicutes	Bacilli	Lactobacillales	Aerococcaceae	Aerococcus			3		9.42029	0.00316678		3.63636	0.000444096
250	Genus	Firmicutes	Bacilli	Lactobacillales	Aerococcaceae	Facklamia			1		2.31884	0.000473296		3.63636	0.000195516
251	Genus	Firmicutes	Bacilli	Lactobacillales	Carnobacteriaceae	Atopostipes			2		1.15942	0.000167742		0	0
252	Genus	Firmicutes	Bacilli	Lactobacillales	Carnobacteriaceae	Trichococcus			1		0.57971	4.04956e-05		0	0
253	Genus	Firmicutes	Bacilli	Lactobacillales	Enterococcaceae	Enterococcus			2		0	0		18.1818	0.0250086
254	Genus	Firmicutes	Bacilli	Erysipelotrichales	Erysipelotrichaceae	Ileibacterium			9		18.1159	0.631533		1.81818	3.28791e-05
255	Genus	Firmicutes	Bacilli	Erysipelotrichales	Erysipelotrichaceae	__			6		10.2899	0.578724		5.45455	0.00261229
256	Genus	Firmicutes	Bacilli	Erysipelotrichales	Erysipelotrichaceae	uncultured			9		27.3913	0.167154		0	0
257	Genus	Firmicutes	Bacilli	Erysipelotrichales	Erysipelotrichaceae	[Clostridium]_innocuum_group			6		0	0		92.7273	0.826696
258	Genus	Firmicutes	Bacilli	Erysipelotrichales	Erysipelotrichaceae	Dielma			1		0	0		9.09091	0.0102328
259	Genus	Firmicutes	Bacilli	Erysipelotrichales	Erysipelotrichaceae	Holdemania			1		0	0		9.09091	0.0105379
260	Genus	Firmicutes	Bacilli	Erysipelotrichales	Erysipelatoclostridiaceae	UCG-004			1		2.02899	0.000703034		0	0
261	Genus	Firmicutes	Bacilli	Erysipelotrichales	Erysipelatoclostridiaceae	Candidatus_Stoquefichus			1		0	0		16.3636	0.0503989
262	Genus	Firmicutes	Bacilli	Erysipelotrichales	Erysipelatoclostridiaceae	Erysipelatoclostridium			1		0	0		7.27273	0.0195091
263	Genus	Firmicutes	Bacilli	Acholeplasmatales	Acholeplasmataceae	Anaeroplasma			2		49.5652	0.478316		0	0
264	Genus	Firmicutes	Bacilli	RF39	RF39	RF39			138		85.5072	0.0742875		0	0
265	Genus	Firmicutes	Bacilli	Mycoplasmatales	Mycoplasmataceae	Ureaplasma			4		13.0435	0.0107035		23.6364	0.0321152
266	Genus	Firmicutes	Bacilli	Staphylococcales	Staphylococcaceae	Staphylococcus			5		2.89855	0.000738857		7.27273	0.00179091
267	Genus	Firmicutes	Bacilli	Staphylococcales	Staphylococcaceae	Jeotgalicoccus			4		4.92754	0.000733244		7.27273	0.000516096
268	Genus	Firmicutes	Bacilli	Bacillales	Planococcaceae	__			1		1.44928	0.000185203		1.81818	9.80733e-05
269	Genus	Firmicutes	Bacilli	Bacillales	Planococcaceae	Sporosarcina			1		0.869565	8.8503e-05		0	0
270	Genus	Firmicutes	Bacilli	Bacillales	Planococcaceae	Lysinibacillus			1		0.724638	6.89526e-05		0	0
271	Genus	Firmicutes	Bacilli	Bacillales	Bacillaceae	Bacillus			2		1.88406	0.000291325		0	0
272	Genus	Firmicutes	Bacilli	Thermoactinomycetales	Thermoactinomycetaceae	Thermoactinomyces			2		4.63768	0.000482777		1.81818	0.000109588
273	Genus	Firmicutes	Bacilli	Thermoactinomycetales	Thermoactinomycetaceae	__			1		0.434783	1.63225e-05		0	0
274	Genus	Firmicutes	Negativicutes	Veillonellales-Selenomonadales	Selenomonadaceae	Veillonellaceae_UCG-001			2		18.2609	0.122864		52.7273	0.675058
275	Genus	Firmicutes	Negativicutes	Veillonellales-Selenomonadales	Veillonellaceae	Veillonella			1		0.289855	1.72633e-05		5.45455	0.0143961
276	Genus	Firmicutes	Syntrophomonadia	Syntrophomonadales	Syntrophomonadaceae	Syntrophomonas			1		30.8696	0.00810213		0	0
277	Genus	Firmicutes	Syntrophomonadia	Syntrophomonadales	Syntrophomonadaceae	__			1		0.57971	4.68527e-05		0	0
278	Genus	Bacteroidota	Bacteroidia	Bacteroidales	Muribaculaceae	Muribaculaceae			407		100	16.5451		100	38.498
279	Genus	Bacteroidota	Bacteroidia	Bacteroidales	Rikenellaceae	Alistipes			28		100	3.52571		58.1818	0.504149
280	Genus	Bacteroidota	Bacteroidia	Bacteroidales	Rikenellaceae	Rikenella			5		69.4203	0.258664		1.81818	0.0166576
281	Genus	Bacteroidota	Bacteroidia	Bacteroidales	Rs-E47_termite_group	Rs-E47_termite_group			17		75.7971	3.51645		38.1818	0.412877
282	Genus	Bacteroidota	Bacteroidia	Bacteroidales	Marinifilaceae	Odoribacter			14		97.1014	1.76688		7.27273	0.0179038
283	Genus	Bacteroidota	Bacteroidia	Bacteroidales	__	__			6		66.8116	1.46489		0	0
284	Genus	Bacteroidota	Bacteroidia	Bacteroidales	F082	F082			4		1.88406	0.000155204		0	0
285	Genus	Bacteroidota	Bacteroidia	Bacteroidales	Bacteroidaceae	Bacteroides			3		0.434783	5.52615e-05		54.5455	1.8254
286	Genus	Desulfobacterota	Desulfovibrionia	Desulfovibrionales	Desulfovibrionaceae	Desulfovibrio			164		100	8.07263		98.1818	5.786
287	Genus	Desulfobacterota	Desulfovibrionia	Desulfovibrionales	Desulfovibrionaceae	Bilophila			5		97.6812	0.333643		100	0.171265
288	Genus	Desulfobacterota	Desulfovibrionia	Desulfovibrionales	Desulfovibrionaceae	__			1		27.971	0.0954108		1.81818	0.014159
289	Genus	Desulfobacterota	Desulfovibrionia	Desulfovibrionales	Desulfovibrionaceae	uncultured			9		76.5217	0.0295955		100	0.212019
290	Genus	Desulfobacterota	Desulfovibrionia	Desulfovibrionales	__	__			5		92.029	0.510834		54.5455	0.123499
291	Genus	Desulfobacterota	Desulfovibrionia	Desulfovibrionales	Desulfomicrobiaceae	Desulfomicrobium			1		0.869565	4.55682e-05		0	0
292	Genus	Spirochaetota	Spirochaetia	Spirochaetales	Spirochaetaceae	Termite_Treponema_cluster			8		68.9855	4.32373		7.27273	0.0514385
293	Genus	Spirochaetota	Spirochaetia	Spirochaetales	Spirochaetaceae	Treponema			6		43.6232	0.169644		0	0
294	Genus	Spirochaetota	Spirochaetia	Spirochaetales	Spirochaetaceae	__			3		1.44928	8.49284e-05		0	0
295	Genus	Spirochaetota	Brachyspirae	Brachyspirales	Brachyspiraceae	Brachyspira			3		81.7391	0.026385		45.4545	0.00964456
296	Genus	Campilobacterota	Campylobacteria	Campylobacterales	Helicobacteraceae	Helicobacter			4		86.2319	2.95153		98.1818	6.79124
297	Genus	Proteobacteria	Alphaproteobacteria	Rickettsiales	uncultured	uncultured			18		100	1.86826		94.5455	1.53317
298	Genus	Proteobacteria	Alphaproteobacteria	Paracaedibacterales	Paracaedibacteraceae	uncultured			9		89.7101	0.637535		92.7273	0.529123
299	Genus	Proteobacteria	Alphaproteobacteria	Rhizobiales	Rhizobiales_Incertae_Sedis	Bauldia			2		16.5217	0.025755		1.81818	0.00654046
300	Genus	Proteobacteria	Alphaproteobacteria	Rhodospirillales	uncultured	uncultured			7		35.7971	0.0137433		78.1818	0.435315
301	Genus	Proteobacteria	Gammaproteobacteria	Cellvibrionales	Cellvibrionaceae	__			1		40.5797	0.213739		45.4545	0.237701
302	Genus	Proteobacteria	Gammaproteobacteria	Burkholderiales	Oxalobacteraceae	Oxalobacter			4		91.4493	0.0812345		54.5455	0.0336872
303	Genus	Proteobacteria	Gammaproteobacteria	Burkholderiales	Nitrosomonadaceae	Nitrosomonas			5		84.2029	0.022681		90.9091	0.0270194
304	Genus	Proteobacteria	Gammaproteobacteria	Burkholderiales	Sutterellaceae	Parasutterella			2		2.17391	0.00180013		92.7273	1.51154
305	Genus	Proteobacteria	Gammaproteobacteria	Burkholderiales	Methylophilaceae	OM43_clade			1		5.65217	0.000680586		1.81818	5.5982e-05
306	Genus	Proteobacteria	Gammaproteobacteria	Burkholderiales	Alcaligenaceae	Paenalcaligenes			1		0.57971	0.000177244		0	0
307	Genus	Proteobacteria	Gammaproteobacteria	Pasteurellales	Pasteurellaceae	__			1		23.3333	0.00366388		23.6364	0.00538859
308	Genus	Proteobacteria	Gammaproteobacteria	Pasteurellales	Pasteurellaceae	Pasteurella			1		7.97101	0.0008865		5.45455	0.000462944
309	Genus	Proteobacteria	Gammaproteobacteria	Pasteurellales	Pasteurellaceae	Haemophilus			4		3.91304	0.000335667		3.63636	0.000746924
310	Genus	Proteobacteria	Gammaproteobacteria	Pasteurellales	Pasteurellaceae	Rodentibacter			3		1.5942	0.000112572		3.63636	0.00626591
311	Genus	Proteobacteria	Gammaproteobacteria	Pseudomonadales	Moraxellaceae	Acinetobacter			1		1.73913	0.000582514		0	0
312	Genus	Proteobacteria	Gammaproteobacteria	Pseudomonadales	Moraxellaceae	Psychrobacter			1		0.57971	8.66699e-05		1.81818	0.000271626
313	Genus	Proteobacteria	Gammaproteobacteria	Pseudomonadales	Moraxellaceae	Enhydrobacter			1		0.289855	3.36757e-05		0	0
314	Genus	Proteobacteria	Gammaproteobacteria	Enterobacterales	Enterobacteriaceae	Enterobacter			1		0.144928	1.12933e-05		1.81818	0.0430683
315	Genus	Deferribacterota	Deferribacteres	Deferribacterales	Deferribacteraceae	Mucispirillum			19		93.7681	1.57695		74.5455	0.713202
316	Genus	Verrucomicrobiota	Verrucomicrobiae	Opitutales	Puniceicoccaceae	__			9		92.3188	0.923883		78.1818	0.606217
317	Genus	Verrucomicrobiota	Verrucomicrobiae	Opitutales	Puniceicoccaceae	uncultured			2		21.3043	0.117602		20	0.15716
318	Genus	Verrucomicrobiota	__	__	__	__			1		0.57971	4.71072e-05		0	0
319	Genus	Actinobacteriota	Coriobacteriia	Coriobacteriales	Eggerthellaceae	Enterorhabdus			90		99.8551	0.285414		80	0.0518881
320	Genus	Actinobacteriota	Coriobacteriia	Coriobacteriales	Eggerthellaceae	__			12		60.2899	0.0224016		0	0
321	Genus	Actinobacteriota	Coriobacteriia	Coriobacteriales	Eggerthellaceae	Adlercreutzia			14		67.971	0.0219968		49.0909	0.0132028
322	Genus	Actinobacteriota	Coriobacteriia	Coriobacteriales	Eggerthellaceae	uncultured			1		2.75362	0.000307713		0	0
323	Genus	Actinobacteriota	Coriobacteriia	Coriobacteriales	Coriobacteriales_Incertae_Sedis	uncultured			3		32.1739	0.0315706		0	0
324	Genus	Actinobacteriota	Actinobacteria	Bifidobacteriales	Bifidobacteriaceae	Bifidobacterium			2		11.7391	0.100277		50.9091	1.42163
325	Genus	Actinobacteriota	Actinobacteria	Corynebacteriales	Corynebacteriaceae	Corynebacterium			4		58.8406	0.0162994		65.4545	0.0159543
326	Genus	Actinobacteriota	Actinobacteria	Micrococcales	Dermabacteraceae	Brachybacterium			1		17.6812	0.00161445		7.27273	0.000378657
327	Genus	Actinobacteriota	Actinobacteria	Micrococcales	Micrococcaceae	Rothia			1		11.1594	0.000994677		9.09091	0.000759957
328	Genus	Actinobacteriota	Actinobacteria	Micrococcales	Microbacteriaceae	Leucobacter			1		0.289855	0.000104152		0	0
329	Genus	Actinobacteriota	Actinobacteria	Micrococcales	Brevibacteriaceae	Brevibacterium			1		0.289855	5.97188e-05		0	0
330	Genus	Cyanobacteria	Vampirivibrionia	Gastranaerophilales	Gastranaerophilales	Gastranaerophilales			48		91.5942	0.188343		92.7273	1.20815
331	Genus	Patescibacteria	Saccharimonadia	Saccharimonadales	Saccharimonadaceae	Candidatus_Saccharimonas			33		81.4493	0.0365724		1.81818	0.000263033
332	Genus	__	__	__	__	__			2		0.434783	5.85399e-05		1.81818	0.000114455
333	Genus	Fusobacteriota	Fusobacteriia	Fusobacteriales	Fusobacteriaceae	Fusobacterium			1		0	0		32.7273	2.6336
334	Species	Firmicutes	Clostridia	Lachnospirales	Lachnospiraceae	Lachnospiraceae_NK4A136_group	__		12		32.1739	0.0497101		1.81818	0.00183234
335	Species	Firmicutes	Clostridia	Lachnospirales	Lachnospiraceae	Lachnospiraceae_NK4A136_group	uncultured_bacterium		444		100	8.24392		30.9091	1.24749
336	Species	Firmicutes	Clostridia	Lachnospirales	Lachnospiraceae	uncultured	__		20		76.5217	0.0544487		3.63636	0.00983337
337	Species	Firmicutes	Clostridia	Lachnospirales	Lachnospiraceae	uncultured	uncultured_bacterium		593		100	4.37622		52.7273	1.3897
338	Species	Firmicutes	Clostridia	Lachnospirales	Lachnospiraceae	uncultured	uncultured_organism		1		1.44928	9.58024e-05		0	0
339	Species	Firmicutes	Clostridia	Lachnospirales	Lachnospiraceae	__	__		363		100	2.34876		100	13.7735
340	Species	Firmicutes	Clostridia	Lachnospirales	Lachnospiraceae	Roseburia	__		11		63.7681	0.0438611		0	0
341	Species	Firmicutes	Clostridia	Lachnospirales	Lachnospiraceae	Roseburia	uncultured_bacterium		197		99.8551	2.27624		69.0909	0.509753
342	Species	Firmicutes	Clostridia	Lachnospirales	Lachnospiraceae	Lachnospiraceae_UCG-001	uncultured_bacterium		78		98.5507	1.50364		52.7273	0.117398
343	Species	Firmicutes	Clostridia	Lachnospirales	Lachnospiraceae	Lachnospiraceae_UCG-001	__		2		38.6957	0.0453772		0	0
344	Species	Firmicutes	Clostridia	Lachnospirales	Lachnospiraceae	Blautia	__		2		1.73913	0.000228575		7.27273	0.000779126
345	Species	Firmicutes	Clostridia	Lachnospirales	Lachnospiraceae	Blautia	uncultured_bacterium		68		98.8406	0.689862		83.6364	2.78796
346	Species	Firmicutes	Clostridia	Lachnospirales	Lachnospiraceae	Lachnoclostridium	__		21		52.1739	0.0148495		89.0909	2.0599
347	Species	Firmicutes	Clostridia	Lachnospirales	Lachnospiraceae	Lachnoclostridium	uncultured_bacterium		56		100	0.50339		36.3636	0.323518
348	Species	Firmicutes	Clostridia	Lachnospirales	Lachnospiraceae	Lachnoclostridium	uncultured_organism		1		17.5362	0.0100253		0	0
349	Species	Firmicutes	Clostridia	Lachnospirales	Lachnospiraceae	A2	__		3		3.04348	0.000215044		0	0
350	Species	Firmicutes	Clostridia	Lachnospirales	Lachnospiraceae	A2	uncultured_bacterium		19		93.4783	0.496294		1.81818	0.00558945
351	Species	Firmicutes	Clostridia	Lachnospirales	Lachnospiraceae	[Eubacterium]_xylanophilum_group	uncultured_bacterium		15		97.3913	0.480445		0	0
352	Species	Firmicutes	Clostridia	Lachnospirales	Lachnospiraceae	Lachnospiraceae_UCG-006	uncultured_bacterium		37		99.4203	0.414804		50.9091	0.581587
353	Species	Firmicutes	Clostridia	Lachnospirales	Lachnospiraceae	Tyzzerella	__		19		85.5072	0.295847		1.81818	0.0028276
354	Species	Firmicutes	Clostridia	Lachnospirales	Lachnospiraceae	Tyzzerella	uncultured_bacterium		30		73.1884	0.113433		1.81818	0.00161821
355	Species	Firmicutes	Clostridia	Lachnospirales	Lachnospiraceae	Tyzzerella	uncultured_rumen		1		0.289855	2.13215e-05		0	0
356	Species	Firmicutes	Clostridia	Lachnospirales	Lachnospiraceae	ASF356	uncultured_bacterium		11		86.9565	0.335533		3.63636	0.0473056
357	Species	Firmicutes	Clostridia	Lachnospirales	Lachnospiraceae	Coprococcus	uncultured_bacterium		3		22.1739	0.304942		0	0
358	Species	Firmicutes	Clostridia	Lachnospirales	Lachnospiraceae	Acetatifactor	__		3		61.5942	0.232182		0	0
359	Species	Firmicutes	Clostridia	Lachnospirales	Lachnospiraceae	Acetatifactor	uncultured_bacterium		9		55.942	0.0264885		1.81818	0.000657582
360	Species	Firmicutes	Clostridia	Lachnospirales	Lachnospiraceae	GCA-900066575	__		1		5.36232	0.00938939		0	0
361	Species	Firmicutes	Clostridia	Lachnospirales	Lachnospiraceae	GCA-900066575	uncultured_bacterium		53		95.6522	0.19435		1.81818	0.00108501
362	Species	Firmicutes	Clostridia	Lachnospirales	Lachnospiraceae	Lachnospiraceae_NK4B4_group	__		1		3.47826	0.00162197		0	0
363	Species	Firmicutes	Clostridia	Lachnospirales	Lachnospiraceae	Lachnospiraceae_NK4B4_group	uncultured_bacterium		21		83.0435	0.149663		0	0
364	Species	Firmicutes	Clostridia	Lachnospirales	Lachnospiraceae	Lachnospira	__		2		0.869565	4.02376e-05		0	0
365	Species	Firmicutes	Clostridia	Lachnospirales	Lachnospiraceae	Lachnospira	uncultured_bacterium		3		62.4638	0.0961649		3.63636	0.00629332
366	Species	Firmicutes	Clostridia	Lachnospirales	Lachnospiraceae	Tuzzerella	uncultured_bacterium		4		92.3188	0.0852251		0	0
367	Species	Firmicutes	Clostridia	Lachnospirales	Lachnospiraceae	Lachnospiraceae_FCS020_group	uncultured_bacterium		20		89.1304	0.0820786		1.81818	0.00253169
368	Species	Firmicutes	Clostridia	Lachnospirales	Lachnospiraceae	Acetitomaculum	__		2		1.15942	0.000121135		0	0
369	Species	Firmicutes	Clostridia	Lachnospirales	Lachnospiraceae	Acetitomaculum	uncultured_bacterium		16		72.6087	0.0549364		1.81818	0.00156971
370	Species	Firmicutes	Clostridia	Lachnospirales	Lachnospiraceae	Oribacterium	__		2		65.0725	0.0434651		0	0
371	Species	Firmicutes	Clostridia	Lachnospirales	Lachnospiraceae	Lachnospiraceae_AC2044_group	__		2		69.8551	0.0219233		0	0
372	Species	Firmicutes	Clostridia	Lachnospirales	Lachnospiraceae	Lachnospiraceae_AC2044_group	uncultured_bacterium		2		1.73913	0.000127266		0	0
373	Species	Firmicutes	Clostridia	Lachnospirales	Lachnospiraceae	[Ruminococcus]_gauvreauii_group	uncultured_bacterium		3		22.3188	0.0119008		0	0
374	Species	Firmicutes	Clostridia	Lachnospirales	Lachnospiraceae	[Ruminococcus]_torques_group	__		1		0.724638	3.72234e-05		0	0
375	Species	Firmicutes	Clostridia	Lachnospirales	Lachnospiraceae	[Ruminococcus]_torques_group	uncultured_bacterium		2		32.029	0.0110653		0	0
376	Species	Firmicutes	Clostridia	Lachnospirales	Lachnospiraceae	[Eubacterium]_ruminantium_group	uncultured_bacterium		1		3.62319	0.00931624		1.81818	0.0201002
377	Species	Firmicutes	Clostridia	Lachnospirales	Lachnospiraceae	Eisenbergiella	__		1		0.724638	5.47363e-05		0	0
378	Species	Firmicutes	Clostridia	Lachnospirales	Lachnospiraceae	Eisenbergiella	uncultured_bacterium		4		48.9855	0.00990057		0	0
379	Species	Firmicutes	Clostridia	Lachnospirales	Lachnospiraceae	Anaerosporobacter	uncultured_bacterium		1		4.34783	0.00450485		0	0
380	Species	Firmicutes	Clostridia	Lachnospirales	Lachnospiraceae	Lachnospiraceae_UCG-010	uncultured_bacterium		4		21.3043	0.00248554		1.81818	0.00101925
381	Species	Firmicutes	Clostridia	Lachnospirales	Lachnospiraceae	[Eubacterium]_fissicatena_group	__		1		22.3188	0.00231322		0	0
382	Species	Firmicutes	Clostridia	Lachnospirales	Lachnospiraceae	[Eubacterium]_oxidoreducens_group	uncultured_bacterium		9		7.82609	0.000762028		1.81818	0.000151853
383	Species	Firmicutes	Clostridia	Lachnospirales	Lachnospiraceae	[Eubacterium]_oxidoreducens_group	__		1		0.57971	4.09459e-05		0	0
384	Species	Firmicutes	Clostridia	Lachnospirales	Lachnospiraceae	Dorea	__		1		1.30435	0.000105884		0	0
385	Species	Firmicutes	Clostridia	Lachnospirales	Lachnospiraceae	Dorea	uncultured_bacterium		2		2.75362	0.000253286		0	0
386	Species	Firmicutes	Clostridia	Lachnospirales	Lachnospiraceae	Anaerostignum	__		1		3.47826	0.000294786		0	0
387	Species	Firmicutes	Clostridia	Lachnospirales	Lachnospiraceae	Marvinbryantia	uncultured_bacterium		1		2.46377	0.000197756		0	0
388	Species	Firmicutes	Clostridia	Lachnospirales	Lachnospiraceae	Lachnospiraceae_NK3A20_group	uncultured_bacterium		2		1.44928	6.90133e-05		0	0
389	Species	Firmicutes	Clostridia	Lachnospirales	Lachnospiraceae	Lachnospiraceae_UCG-009	__		1		0.434783	3.58391e-05		0	0
390	Species	Firmicutes	Clostridia	Lachnospirales	Lachnospiraceae	Butyrivibrio	__		1		0.57971	3.35204e-05		0	0
391	Species	Firmicutes	Clostridia	Lachnospirales	Lachnospiraceae	Anaerostipes	__		1		0	0		74.5455	0.109358
392	Species	Firmicutes	Clostridia	Oscillospirales	Oscillospiraceae	uncultured	__		6		17.1014	0.00674895		3.63636	7.89325e-05
393	Species	Firmicutes	Clostridia	Oscillospirales	Oscillospiraceae	uncultured	uncultured_bacterium		336		100	3.62494		49.0909	1.37994
394	Species	Firmicutes	Clostridia	Oscillospirales	Oscillospiraceae	Colidextribacter	__		2		14.7826	0.00178593		0	0
395	Species	Firmicutes	Clostridia	Oscillospirales	Oscillospiraceae	Colidextribacter	uncultured_bacterium		92		100	0.649296		34.5455	0.137757
396	Species	Firmicutes	Clostridia	Oscillospirales	Oscillospiraceae	Oscillibacter	uncultured_bacterium		45		100	0.56281		7.27273	0.0546528
397	Species	Firmicutes	Clostridia	Oscillospirales	Oscillospiraceae	UCG-005	__		12		43.1884	0.0380514		0	0
398	Species	Firmicutes	Clostridia	Oscillospirales	Oscillospiraceae	UCG-005	uncultured_bacterium		18		95.3623	0.265506		0	0
399	Species	Firmicutes	Clostridia	Oscillospirales	Oscillospiraceae	UCG-005	uncultured_rumen		2		27.8261	0.00415502		0	0
400	Species	Firmicutes	Clostridia	Oscillospirales	Oscillospiraceae	UCG-003	uncultured_bacterium		26		99.7101	0.214349		1.81818	0.00399783
401	Species	Firmicutes	Clostridia	Oscillospirales	Oscillospiraceae	NK4A214_group	__		1		0.57971	4.45884e-05		0	0
402	Species	Firmicutes	Clostridia	Oscillospirales	Oscillospiraceae	NK4A214_group	uncultured_bacterium		22		97.5362	0.179099		0	0
403	Species	Firmicutes	Clostridia	Oscillospirales	Oscillospiraceae	__	__		35		77.8261	0.0340441		3.63636	0.00147605
404	Species	Firmicutes	Clostridia	Oscillospirales	Oscillospiraceae	UCG-002	uncultured_bacterium		3		33.6232	0.0326473		0	0
405	Species	Firmicutes	Clostridia	Oscillospirales	Oscillospiraceae	UCG-007	__		3		17.3913	0.00244349		0	0
406	Species	Firmicutes	Clostridia	Oscillospirales	Oscillospiraceae	Flavonifractor	uncultured_bacterium		2		21.1594	0.00227192		0	0
407	Species	Firmicutes	Clostridia	Oscillospirales	Oscillospiraceae	Oscillospira	__		1		2.89855	0.000280503		0	0
408	Species	Firmicutes	Clostridia	Oscillospirales	Ruminococcaceae	uncultured	__		23		98.2609	0.971862		9.09091	0.0414008
409	Species	Firmicutes	Clostridia	Oscillospirales	Ruminococcaceae	uncultured	uncultured_bacterium		187		100	1.35179		80	0.472108
410	Species	Firmicutes	Clostridia	Oscillospirales	Ruminococcaceae	Ruminococcus	__		3		24.3478	0.124486		3.63636	0.0357857
411	Species	Firmicutes	Clostridia	Oscillospirales	Ruminococcaceae	Ruminococcus	uncultured_bacterium		6		74.4928	0.713128		0	0
412	Species	Firmicutes	Clostridia	Oscillospirales	Ruminococcaceae	Incertae_Sedis	__		9		66.5217	0.0845096		3.63636	0.0112008
413	Species	Firmicutes	Clostridia	Oscillospirales	Ruminococcaceae	Incertae_Sedis	uncultured_bacterium		107		100	0.555971		69.0909	0.758103
414	Species	Firmicutes	Clostridia	Oscillospirales	Ruminococcaceae	Incertae_Sedis	uncultured_organism		1		2.46377	0.0024511		54.5455	0.078723
415	Species	Firmicutes	Clostridia	Oscillospirales	Ruminococcaceae	[Eubacterium]_siraeum_group	uncultured_bacterium		17		91.0145	0.634286		0	0
416	Species	Firmicutes	Clostridia	Oscillospirales	Ruminococcaceae	UBA1819	__		26		96.2319	0.231904		5.45455	0.0156285
417	Species	Firmicutes	Clostridia	Oscillospirales	Ruminococcaceae	UBA1819	uncultured_organism		9		86.5217	0.200855		5.45455	0.0101169
418	Species	Firmicutes	Clostridia	Oscillospirales	Ruminococcaceae	Fournierella	__		8		67.5362	0.0408894		1.81818	0.00227654
419	Species	Firmicutes	Clostridia	Oscillospirales	Ruminococcaceae	Fournierella	uncultured_bacterium		3		48.5507	0.241936		0	0
420	Species	Firmicutes	Clostridia	Oscillospirales	Ruminococcaceae	Ruminococcaceae	uncultured_bacterium		10		70.5797	0.125615		0	0
421	Species	Firmicutes	Clostridia	Oscillospirales	Ruminococcaceae	__	__		42		85.6522	0.0428775		3.63636	0.00450638
422	Species	Firmicutes	Clostridia	Oscillospirales	Ruminococcaceae	Paludicola	uncultured_bacterium		5		44.6377	0.00609563		85.4545	0.0697392
423	Species	Firmicutes	Clostridia	Oscillospirales	Ruminococcaceae	Anaerofilum	__		4		29.2754	0.00470569		0	0
424	Species	Firmicutes	Clostridia	Oscillospirales	Ruminococcaceae	Anaerotruncus	__		2		2.17391	0.000159431		3.63636	0.000938784
425	Species	Firmicutes	Clostridia	Oscillospirales	Ruminococcaceae	Anaerotruncus	uncultured_bacterium		5		32.6087	0.0041929		12.7273	0.0142019
426	Species	Firmicutes	Clostridia	Oscillospirales	Ruminococcaceae	Candidatus_Soleaferrea	uncultured_bacterium		2		7.10145	0.00237416		0	0
427	Species	Firmicutes	Clostridia	Oscillospirales	Butyricicoccaceae	Butyricicoccus	uncultured_bacterium		22		94.2029	0.125907		1.81818	0.00687173
428	Species	Firmicutes	Clostridia	Oscillospirales	Butyricicoccaceae	UCG-009	__		2		21.3043	0.00464487		1.81818	0.00061078
429	Species	Firmicutes	Clostridia	Oscillospirales	Butyricicoccaceae	UCG-009	uncultured_bacterium		18		95.7971	0.118062		0	0
430	Species	Firmicutes	Clostridia	Oscillospirales	[Eubacterium]_coprostanoligenes_group	[Eubacterium]_coprostanoligenes_group	uncultured_bacterium		15		68.8406	0.0660359		23.6364	0.0427035
431	Species	Firmicutes	Clostridia	Oscillospirales	UCG-010	UCG-010	uncultured_bacterium		8		65.942	0.0325431		5.45455	0.000968203
432	Species	Firmicutes	Clostridia	Oscillospirales	[Clostridium]_methylpentosum_group	[Clostridium]_methylpentosum_group	__		2		4.34783	0.00984156		0	0
433	Species	Firmicutes	Clostridia	Oscillospirales	__	__	__		16		19.4203	0.00205434		74.5455	0.0314815
434	Species	Firmicutes	Clostridia	Oscillospirales	Oscillospirales	Hydrogenoanaerobacterium	__		1		2.75362	0.000212496		0	0
435	Species	Firmicutes	Clostridia	Oscillospirales	Oscillospirales	Hydrogenoanaerobacterium	uncultured_bacterium		1		0.869565	7.71153e-05		0	0
436	Species	Firmicutes	Clostridia	Christensenellales	Christensenellaceae	uncultured	__		6		67.6812	0.704649		1.81818	0.000149172
437	Species	Firmicutes	Clostridia	Christensenellales	Christensenellaceae	uncultured	uncultured_bacterium		13		73.0435	1.58023		27.2727	0.00374331
438	Species	Firmicutes	Clostridia	Christensenellales	Christensenellaceae	__	__		30		85.2174	2.24722		5.45455	0.00191958
439	Species	Firmicutes	Clostridia	Christensenellales	Christensenellaceae	Christensenella	__		5		35.942	0.00440311		1.81818	0.000333153
440	Species	Firmicutes	Clostridia	Christensenellales	Christensenellaceae	Christensenellaceae_R-7_group	uncultured_bacterium		2		1.15942	0.000303781		0	0
441	Species	Firmicutes	Clostridia	Clostridia_vadinBB60_group	Clostridia_vadinBB60_group	Clostridia_vadinBB60_group	uncultured_bacterium		270		100	2.21807		34.5455	0.263169
442	Species	Firmicutes	Clostridia	Clostridia_vadinBB60_group	Clostridia_vadinBB60_group	Clostridia_vadinBB60_group	__		22		67.6812	0.143397		0	0
443	Species	Firmicutes	Clostridia	Clostridia_vadinBB60_group	Clostridia_vadinBB60_group	Clostridia_vadinBB60_group	uncultured_Clostridiales		7		39.2754	0.117848		0	0
444	Species	Firmicutes	Clostridia	Peptococcales	Peptococcaceae	uncultured	uncultured_bacterium		17		93.6232	0.465774		1.81818	0.00399783
445	Species	Firmicutes	Clostridia	Peptococcales	Peptococcaceae	Peptococcus	__		25		94.3478	0.102128		1.81818	0.00328791
446	Species	Firmicutes	Clostridia	Peptococcales	Peptococcaceae	Peptococcus	uncultured_organism		2		32.6087	0.00542544		0	0
447	Species	Firmicutes	Clostridia	Peptostreptococcales-Tissierellales	Anaerovoracaceae	Family_XIII_UCG-001	uncultured_bacterium		5		86.5217	0.0756518		0	0
448	Species	Firmicutes	Clostridia	Peptostreptococcales-Tissierellales	Anaerovoracaceae	[Eubacterium]_brachy_group	uncultured_bacterium		21		95.6522	0.067052		7.27273	0.0110236
449	Species	Firmicutes	Clostridia	Peptostreptococcales-Tissierellales	Anaerovoracaceae	Family_XIII_AD3011_group	__		1		16.5217	0.00206855		0	0
450	Species	Firmicutes	Clostridia	Peptostreptococcales-Tissierellales	Anaerovoracaceae	Family_XIII_AD3011_group	uncultured_bacterium		12		76.8116	0.0375769		1.81818	0.000313433
451	Species	Firmicutes	Clostridia	Peptostreptococcales-Tissierellales	Anaerovoracaceae	__	__		5		23.6232	0.00502402		0	0
452	Species	Firmicutes	Clostridia	Peptostreptococcales-Tissierellales	Anaerovoracaceae	Anaerovorax	__		1		1.88406	0.000157737		0	0
453	Species	Firmicutes	Clostridia	Peptostreptococcales-Tissierellales	Anaerovoracaceae	Anaerovorax	uncultured_bacterium		3		21.1594	0.00209061		1.81818	0.00193987
454	Species	Firmicutes	Clostridia	Peptostreptococcales-Tissierellales	Anaerovoracaceae	[Eubacterium]_nodatum_group	uncultured_bacterium		2		6.52174	0.000736118		16.3636	0.00989464
455	Species	Firmicutes	Clostridia	Peptostreptococcales-Tissierellales	Peptostreptococcales-Tissierellales	Anoxynatronum	__		1		0.57971	2.32141e-05		0	0
456	Species	Firmicutes	Clostridia	Monoglobales	Monoglobaceae	Monoglobus	uncultured_bacterium		5		32.8986	0.186232		0	0
457	Species	Firmicutes	Clostridia	__	__	__	__		28		87.2464	0.0536834		3.63636	0.00368817
458	Species	Firmicutes	Clostridia	Clostridia_UCG-014	Clostridia_UCG-014	Clostridia_UCG-014	__		4		7.3913	0.00149645		0	0
459	Species	Firmicutes	Clostridia	Clostridia_UCG-014	Clostridia_UCG-014	Clostridia_UCG-014	uncultured_bacterium		98		80.8696	0.0460054		1.81818	9.74426e-05
460	Species	Firmicutes	Clostridia	Clostridia_UCG-014	Clostridia_UCG-014	Clostridia_UCG-014	uncultured_organism		1		6.52174	0.00139833		0	0
461	Species	Firmicutes	Clostridia	Clostridiales	Clostridiaceae	Candidatus_Arthromitus	Candidatus_Arthromitus		2		14.7826	0.0534368		3.63636	0.0153057
462	Species	Firmicutes	Clostridia	Clostridiales	Clostridiaceae	Clostridium_sensu_stricto_1	uncultured_bacterium		1		0	0		1.81818	0.000980733
463	Species	Firmicutes	Clostridia	Eubacteriales	Anaerofustaceae	Anaerofustis	__		2		11.7391	0.0011016		27.2727	0.00667957
464	Species	Firmicutes	Clostridia	Clostridia	Gracilibacteraceae	__	__		2		2.17391	0.000169168		0	0
465	Species	Firmicutes	Bacilli	Lactobacillales	Lactobacillaceae	Lactobacillus	Lactobacillus_johnsonii		2		28.9855	0.323736		43.6364	0.481127
466	Species	Firmicutes	Bacilli	Lactobacillales	Lactobacillaceae	Lactobacillus	Lactobacillus_reuteri		1		0.434783	1.85939e-05		1.81818	0.000149172
467	Species	Firmicutes	Bacilli	Lactobacillales	Lactobacillaceae	Lactobacillus	__		32		88.1159	3.39665		89.0909	4.20781
468	Species	Firmicutes	Bacilli	Lactobacillales	Lactobacillaceae	Lactobacillus	uncultured_bacterium		31		89.7101	1.30678		98.1818	1.49911
469	Species	Firmicutes	Bacilli	Lactobacillales	Streptococcaceae	Streptococcus	Streptococcus_criceti		1		17.1014	0.00188292		10.9091	0.00123364
470	Species	Firmicutes	Bacilli	Lactobacillales	Streptococcaceae	Streptococcus	__		9		50.5797	0.0099469		38.1818	0.00816435
471	Species	Firmicutes	Bacilli	Lactobacillales	Streptococcaceae	Streptococcus	Streptococcus_halotolerans		1		1.01449	0.000105407		3.63636	0.000357394
472	Species	Firmicutes	Bacilli	Lactobacillales	Streptococcaceae	Streptococcus	Streptococcus_salivarius		1		0.289855	3.18345e-05		0	0
473	Species	Firmicutes	Bacilli	Lactobacillales	Streptococcaceae	Streptococcus	uncultured_bacterium		2		1.30435	9.77439e-05		0	0
474	Species	Firmicutes	Bacilli	Lactobacillales	Aerococcaceae	Aerococcus	Aerococcus_viridans		2		1.73913	0.000148239		1.81818	5.43252e-05
475	Species	Firmicutes	Bacilli	Lactobacillales	Aerococcaceae	Aerococcus	__		1		8.98551	0.00301854		1.81818	0.00038977
476	Species	Firmicutes	Bacilli	Lactobacillales	Aerococcaceae	Facklamia	__		1		2.31884	0.000473296		3.63636	0.000195516
477	Species	Firmicutes	Bacilli	Lactobacillales	Carnobacteriaceae	Atopostipes	uncultured_bacterium		2		1.15942	0.000167742		0	0
478	Species	Firmicutes	Bacilli	Lactobacillales	Carnobacteriaceae	Trichococcus	__		1		0.57971	4.04956e-05		0	0
479	Species	Firmicutes	Bacilli	Lactobacillales	Enterococcaceae	Enterococcus	__		2		0	0		18.1818	0.0250086
480	Species	Firmicutes	Bacilli	Erysipelotrichales	Erysipelotrichaceae	Ileibacterium	__		9		18.1159	0.631533		1.81818	3.28791e-05
481	Species	Firmicutes	Bacilli	Erysipelotrichales	Erysipelotrichaceae	__	__		6		10.2899	0.578724		5.45455	0.00261229
482	Species	Firmicutes	Bacilli	Erysipelotrichales	Erysipelotrichaceae	uncultured	__		1		7.82609	0.00270902		0	0
483	Species	Firmicutes	Bacilli	Erysipelotrichales	Erysipelotrichaceae	uncultured	uncultured_bacterium		8		21.1594	0.164445		0	0
484	Species	Firmicutes	Bacilli	Erysipelotrichales	Erysipelotrichaceae	[Clostridium]_innocuum_group	__		1		0	0		5.45455	0.000468491
485	Species	Firmicutes	Bacilli	Erysipelotrichales	Erysipelotrichaceae	[Clostridium]_innocuum_group	uncultured_bacterium		5		0	0		92.7273	0.826227
486	Species	Firmicutes	Bacilli	Erysipelotrichales	Erysipelotrichaceae	Dielma	uncultured_bacterium		1		0	0		9.09091	0.0102328
487	Species	Firmicutes	Bacilli	Erysipelotrichales	Erysipelotrichaceae	Holdemania	__		1		0	0		9.09091	0.0105379
488	Species	Firmicutes	Bacilli	Erysipelotrichales	Erysipelatoclostridiaceae	UCG-004	uncultured_bacterium		1		2.02899	0.000703034		0	0
489	Species	Firmicutes	Bacilli	Erysipelotrichales	Erysipelatoclostridiaceae	Candidatus_Stoquefichus	uncultured_bacterium		1		0	0		16.3636	0.0503989
490	Species	Firmicutes	Bacilli	Erysipelotrichales	Erysipelatoclostridiaceae	Erysipelatoclostridium	__		1		0	0		7.27273	0.0195091
491	Species	Firmicutes	Bacilli	Acholeplasmatales	Acholeplasmataceae	Anaeroplasma	uncultured_bacterium		2		49.5652	0.478316		0	0
492	Species	Firmicutes	Bacilli	RF39	RF39	RF39	__		21		46.5217	0.0118871		0	0
493	Species	Firmicutes	Bacilli	RF39	RF39	RF39	uncultured_bacterium		116		82.6087	0.0623812		0	0
494	Species	Firmicutes	Bacilli	RF39	RF39	RF39	uncultured_rumen		1		0.289855	1.92281e-05		0	0
495	Species	Firmicutes	Bacilli	Mycoplasmatales	Mycoplasmataceae	Ureaplasma	uncultured_bacterium		4		13.0435	0.0107035		23.6364	0.0321152
496	Species	Firmicutes	Bacilli	Staphylococcales	Staphylococcaceae	Staphylococcus	Staphylococcus_sp.		1		0.289855	1.8085e-05		5.45455	0.00136985
497	Species	Firmicutes	Bacilli	Staphylococcales	Staphylococcaceae	Staphylococcus	__		4		2.75362	0.000720772		5.45455	0.000421054
498	Species	Firmicutes	Bacilli	Staphylococcales	Staphylococcaceae	Jeotgalicoccus	__		3		3.91304	0.000607258		7.27273	0.000516096
499	Species	Firmicutes	Bacilli	Staphylococcales	Staphylococcaceae	Jeotgalicoccus	uncultured_bacterium		1		1.44928	0.000125986		0	0
500	Species	Firmicutes	Bacilli	Bacillales	Planococcaceae	__	__		1		1.44928	0.000185203		1.81818	9.80733e-05
501	Species	Firmicutes	Bacilli	Bacillales	Planococcaceae	Sporosarcina	uncultured_bacterium		1		0.869565	8.8503e-05		0	0
502	Species	Firmicutes	Bacilli	Bacillales	Planococcaceae	Lysinibacillus	Solibacillus_sp.		1		0.724638	6.89526e-05		0	0
503	Species	Firmicutes	Bacilli	Bacillales	Bacillaceae	Bacillus	__		2		1.88406	0.000291325		0	0
504	Species	Firmicutes	Bacilli	Thermoactinomycetales	Thermoactinomycetaceae	Thermoactinomyces	__		2		4.63768	0.000482777		1.81818	0.000109588
505	Species	Firmicutes	Bacilli	Thermoactinomycetales	Thermoactinomycetaceae	__	__		1		0.434783	1.63225e-05		0	0
506	Species	Firmicutes	Negativicutes	Veillonellales-Selenomonadales	Selenomonadaceae	Veillonellaceae_UCG-001	uncultured_rumen		2		18.2609	0.122864		52.7273	0.675058
507	Species	Firmicutes	Negativicutes	Veillonellales-Selenomonadales	Veillonellaceae	Veillonella	uncultured_bacterium		1		0.289855	1.72633e-05		5.45455	0.0143961
508	Species	Firmicutes	Syntrophomonadia	Syntrophomonadales	Syntrophomonadaceae	Syntrophomonas	__		1		30.8696	0.00810213		0	0
509	Species	Firmicutes	Syntrophomonadia	Syntrophomonadales	Syntrophomonadaceae	__	__		1		0.57971	4.68527e-05		0	0
510	Species	Bacteroidota	Bacteroidia	Bacteroidales	Muribaculaceae	Muribaculaceae	uncultured_bacterium		407		100	16.5451		100	38.498
511	Species	Bacteroidota	Bacteroidia	Bacteroidales	Rikenellaceae	Alistipes	__		2		1.88406	0.000260461		3.63636	0.000203958
512	Species	Bacteroidota	Bacteroidia	Bacteroidales	Rikenellaceae	Alistipes	uncultured_bacterium		26		100	3.52545		58.1818	0.503945
513	Species	Bacteroidota	Bacteroidia	Bacteroidales	Rikenellaceae	Rikenella	__		5		69.4203	0.258664		1.81818	0.0166576
514	Species	Bacteroidota	Bacteroidia	Bacteroidales	Rs-E47_termite_group	Rs-E47_termite_group	__		16		75.7971	3.5164		38.1818	0.412877
515	Species	Bacteroidota	Bacteroidia	Bacteroidales	Rs-E47_termite_group	Rs-E47_termite_group	uncultured_bacterium		1		0.724638	4.76768e-05		0	0
516	Species	Bacteroidota	Bacteroidia	Bacteroidales	Marinifilaceae	Odoribacter	__		6		86.6667	1.13761		3.63636	0.0151366
517	Species	Bacteroidota	Bacteroidia	Bacteroidales	Marinifilaceae	Odoribacter	uncultured_bacterium		8		91.1594	0.629266		3.63636	0.00276721
518	Species	Bacteroidota	Bacteroidia	Bacteroidales	__	__	__		6		66.8116	1.46489		0	0
519	Species	Bacteroidota	Bacteroidia	Bacteroidales	F082	F082	__		3		1.5942	0.000118468		0	0
520	Species	Bacteroidota	Bacteroidia	Bacteroidales	F082	F082	uncultured_bacterium		1		0.434783	3.67361e-05		0	0
521	Species	Bacteroidota	Bacteroidia	Bacteroidales	Bacteroidaceae	Bacteroides	uncultured_bacterium		3		0.434783	5.52615e-05		54.5455	1.8254
522	Species	Desulfobacterota	Desulfovibrionia	Desulfovibrionales	Desulfovibrionaceae	Desulfovibrio	Desulfovibrio_hydrothermalis		21		95.942	0.538207		80	0.22634
523	Species	Desulfobacterota	Desulfovibrionia	Desulfovibrionales	Desulfovibrionaceae	Desulfovibrio	__		89		100	3.77717		98.1818	3.56145
524	Species	Desulfobacterota	Desulfovibrionia	Desulfovibrionales	Desulfovibrionaceae	Desulfovibrio	uncultured_bacterium		54		98.9855	3.75726		87.2727	1.99821
525	Species	Desulfobacterota	Desulfovibrionia	Desulfovibrionales	Desulfovibrionaceae	Bilophila	uncultured_bacterium		5		97.6812	0.333643		100	0.171265
526	Species	Desulfobacterota	Desulfovibrionia	Desulfovibrionales	Desulfovibrionaceae	__	__		1		27.971	0.0954108		1.81818	0.014159
527	Species	Desulfobacterota	Desulfovibrionia	Desulfovibrionales	Desulfovibrionaceae	uncultured	__		3		3.91304	0.000198826		1.81818	6.1338e-05
528	Species	Desulfobacterota	Desulfovibrionia	Desulfovibrionales	Desulfovibrionaceae	uncultured	uncultured_bacterium		6		76.2319	0.0293967		100	0.211957
529	Species	Desulfobacterota	Desulfovibrionia	Desulfovibrionales	__	__	__		5		92.029	0.510834		54.5455	0.123499
530	Species	Desulfobacterota	Desulfovibrionia	Desulfovibrionales	Desulfomicrobiaceae	Desulfomicrobium	uncultured_bacterium		1		0.869565	4.55682e-05		0	0
531	Species	Spirochaetota	Spirochaetia	Spirochaetales	Spirochaetaceae	Termite_Treponema_cluster	__		8		68.9855	4.32373		7.27273	0.0514385
532	Species	Spirochaetota	Spirochaetia	Spirochaetales	Spirochaetaceae	Treponema	__		6		43.6232	0.169644		0	0
533	Species	Spirochaetota	Spirochaetia	Spirochaetales	Spirochaetaceae	__	__		3		1.44928	8.49284e-05		0	0
534	Species	Spirochaetota	Brachyspirae	Brachyspirales	Brachyspiraceae	Brachyspira	__		3		81.7391	0.026385		45.4545	0.00964456
535	Species	Campilobacterota	Campylobacteria	Campylobacterales	Helicobacteraceae	Helicobacter	__		4		86.2319	2.95153		98.1818	6.79124
536	Species	Proteobacteria	Alphaproteobacteria	Rickettsiales	uncultured	uncultured	__		8		85.6522	1.17745		72.7273	0.906945
537	Species	Proteobacteria	Alphaproteobacteria	Rickettsiales	uncultured	uncultured	uncultured_Alphaproteobacteria		10		98.5507	0.690811		92.7273	0.626229
538	Species	Proteobacteria	Alphaproteobacteria	Paracaedibacterales	Paracaedibacteraceae	uncultured	__		1		66.2319	0.450964		41.8182	0.260849
539	Species	Proteobacteria	Alphaproteobacteria	Paracaedibacterales	Paracaedibacteraceae	uncultured	uncultured_Alphaproteobacteria		1		17.8261	0.110805		14.5455	0.107618
540	Species	Proteobacteria	Alphaproteobacteria	Paracaedibacterales	Paracaedibacteraceae	uncultured	uncultured_bacterium		7		72.7536	0.0757657		83.6364	0.160656
541	Species	Proteobacteria	Alphaproteobacteria	Rhizobiales	Rhizobiales_Incertae_Sedis	Bauldia	__		1		0.724638	3.49577e-05		0	0
542	Species	Proteobacteria	Alphaproteobacteria	Rhizobiales	Rhizobiales_Incertae_Sedis	Bauldia	uncultured_bacterium		1		16.5217	0.02572		1.81818	0.00654046
543	Species	Proteobacteria	Alphaproteobacteria	Rhodospirillales	uncultured	uncultured	uncultured_bacterium		7		35.7971	0.0137433		78.1818	0.435315
544	Species	Proteobacteria	Gammaproteobacteria	Cellvibrionales	Cellvibrionaceae	__	__		1		40.5797	0.213739		45.4545	0.237701
545	Species	Proteobacteria	Gammaproteobacteria	Burkholderiales	Oxalobacteraceae	Oxalobacter	__		4		91.4493	0.0812345		54.5455	0.0336872
546	Species	Proteobacteria	Gammaproteobacteria	Burkholderiales	Nitrosomonadaceae	Nitrosomonas	__		5		84.2029	0.022681		90.9091	0.0270194
547	Species	Proteobacteria	Gammaproteobacteria	Burkholderiales	Sutterellaceae	Parasutterella	uncultured_bacterium		2		2.17391	0.00180013		92.7273	1.51154
548	Species	Proteobacteria	Gammaproteobacteria	Burkholderiales	Methylophilaceae	OM43_clade	uncultured_bacterium		1		5.65217	0.000680586		1.81818	5.5982e-05
549	Species	Proteobacteria	Gammaproteobacteria	Burkholderiales	Alcaligenaceae	Paenalcaligenes	__		1		0.57971	0.000177244		0	0
550	Species	Proteobacteria	Gammaproteobacteria	Pasteurellales	Pasteurellaceae	__	__		1		23.3333	0.00366388		23.6364	0.00538859
551	Species	Proteobacteria	Gammaproteobacteria	Pasteurellales	Pasteurellaceae	Pasteurella	Pasteurella_multocida		1		7.97101	0.0008865		5.45455	0.000462944
552	Species	Proteobacteria	Gammaproteobacteria	Pasteurellales	Pasteurellaceae	Haemophilus	Haemophilus_pittmaniae		3		3.04348	0.000265297		3.63636	0.000746924
553	Species	Proteobacteria	Gammaproteobacteria	Pasteurellales	Pasteurellaceae	Haemophilus	__		1		1.01449	7.03692e-05		0	0
554	Species	Proteobacteria	Gammaproteobacteria	Pasteurellales	Pasteurellaceae	Rodentibacter	Pasteurellaceae_bacterium		1		0.57971	5.45191e-05		0	0
555	Species	Proteobacteria	Gammaproteobacteria	Pasteurellales	Pasteurellaceae	Rodentibacter	__		2		1.01449	5.80533e-05		3.63636	0.00626591
556	Species	Proteobacteria	Gammaproteobacteria	Pseudomonadales	Moraxellaceae	Acinetobacter	__		1		1.73913	0.000582514		0	0
557	Species	Proteobacteria	Gammaproteobacteria	Pseudomonadales	Moraxellaceae	Psychrobacter	Psychrobacter_sp.		1		0.57971	8.66699e-05		1.81818	0.000271626
558	Species	Proteobacteria	Gammaproteobacteria	Pseudomonadales	Moraxellaceae	Enhydrobacter	uncultured_bacterium		1		0.289855	3.36757e-05		0	0
559	Species	Proteobacteria	Gammaproteobacteria	Enterobacterales	Enterobacteriaceae	Enterobacter	__		1		0.144928	1.12933e-05		1.81818	0.0430683
560	Species	Deferribacterota	Deferribacteres	Deferribacterales	Deferribacteraceae	Mucispirillum	__		9		72.7536	0.0145845		38.1818	0.00613727
561	Species	Deferribacterota	Deferribacteres	Deferribacterales	Deferribacteraceae	Mucispirillum	uncultured_bacterium		10		81.7391	1.56237		63.6364	0.707065
562	Species	Verrucomicrobiota	Verrucomicrobiae	Opitutales	Puniceicoccaceae	__	__		9		92.3188	0.923883		78.1818	0.606217
563	Species	Verrucomicrobiota	Verrucomicrobiae	Opitutales	Puniceicoccaceae	uncultured	__		2		21.3043	0.117602		20	0.15716
564	Species	Verrucomicrobiota	__	__	__	__	__		1		0.57971	4.71072e-05		0	0
565	Species	Actinobacteriota	Coriobacteriia	Coriobacteriales	Eggerthellaceae	Enterorhabdus	uncultured_bacterium		89		99.8551	0.285059		80	0.0516642
566	Species	Actinobacteriota	Coriobacteriia	Coriobacteriales	Eggerthellaceae	Enterorhabdus	__		1		3.62319	0.000355425		1.81818	0.000223881
567	Species	Actinobacteriota	Coriobacteriia	Coriobacteriales	Eggerthellaceae	__	__		12		60.2899	0.0224016		0	0
568	Species	Actinobacteriota	Coriobacteriia	Coriobacteriales	Eggerthellaceae	Adlercreutzia	__		14		67.971	0.0219968		49.0909	0.0132028
569	Species	Actinobacteriota	Coriobacteriia	Coriobacteriales	Eggerthellaceae	uncultured	uncultured_bacterium		1		2.75362	0.000307713		0	0
570	Species	Actinobacteriota	Coriobacteriia	Coriobacteriales	Coriobacteriales_Incertae_Sedis	uncultured	__		1		7.3913	0.0227304		0	0
571	Species	Actinobacteriota	Coriobacteriia	Coriobacteriales	Coriobacteriales_Incertae_Sedis	uncultured	uncultured_bacterium		2		25.7971	0.00884019		0	0
572	Species	Actinobacteriota	Actinobacteria	Bifidobacteriales	Bifidobacteriaceae	Bifidobacterium	Bifidobacterium_choerinum		1		0	0		3.63636	0.000420597
573	Species	Actinobacteriota	Actinobacteria	Bifidobacteriales	Bifidobacteriaceae	Bifidobacterium	__		1		11.7391	0.100277		50.9091	1.42121
574	Species	Actinobacteriota	Actinobacteria	Corynebacteriales	Corynebacteriaceae	Corynebacterium	__		2		15.3623	0.00761638		9.09091	0.00352856
575	Species	Actinobacteriota	Actinobacteria	Corynebacteriales	Corynebacteriaceae	Corynebacterium	uncultured_bacterium		1		51.7391	0.00850055		61.8182	0.0120847
576	Species	Actinobacteriota	Actinobacteria	Corynebacteriales	Corynebacteriaceae	Corynebacterium	Corynebacterium_stationis		1		1.88406	0.000182495		1.81818	0.000341049
577	Species	Actinobacteriota	Actinobacteria	Micrococcales	Dermabacteraceae	Brachybacterium	__		1		17.6812	0.00161445		7.27273	0.000378657
578	Species	Actinobacteriota	Actinobacteria	Micrococcales	Micrococcaceae	Rothia	__		1		11.1594	0.000994677		9.09091	0.000759957
579	Species	Actinobacteriota	Actinobacteria	Micrococcales	Microbacteriaceae	Leucobacter	__		1		0.289855	0.000104152		0	0
580	Species	Actinobacteriota	Actinobacteria	Micrococcales	Brevibacteriaceae	Brevibacterium	__		1		0.289855	5.97188e-05		0	0
581	Species	Cyanobacteria	Vampirivibrionia	Gastranaerophilales	Gastranaerophilales	Gastranaerophilales	__		18		80	0.0525644		5.45455	0.00483763
582	Species	Cyanobacteria	Vampirivibrionia	Gastranaerophilales	Gastranaerophilales	Gastranaerophilales	uncultured_bacterium		29		85.7971	0.134892		92.7273	1.20332
583	Species	Cyanobacteria	Vampirivibrionia	Gastranaerophilales	Gastranaerophilales	Gastranaerophilales	uncultured_rumen		1		3.62319	0.000886895		0	0
584	Species	Patescibacteria	Saccharimonadia	Saccharimonadales	Saccharimonadaceae	Candidatus_Saccharimonas	uncultured_bacterium		33		81.4493	0.0365724		1.81818	0.000263033
585	Species	__	__	__	__	__	__		2		0.434783	5.85399e-05		1.81818	0.000114455
586	Species	Fusobacteriota	Fusobacteriia	Fusobacteriales	Fusobacteriaceae	Fusobacterium	Fusobacterium_ulcerans		1		0	0		32.7273	2.6336

## Sheet: TS4_RelAbund_Mean_SD
TS4. Prevalence (fraction of individuals where a taxon was detected) and mean ± SD relative abundance (% reads) of bacterial phyla and genera in bank vole caecal samples. The values are calculated separately for groups determined by presence of Ci, and within groups determined by categorical factors used in statistical models. Only genera present in at least 10% of the Ci-free group animals are s…
				Prevalence (% individuals)								Relative abundance (% reads): Ci-present group				Relative abundance (% reads): Ci-free group
				Ci-		Ci-free						diet				diet			focal individual's line type		cohabitant's line type		sex		cage type		indiv. × coh. line type				indiv. line type × diet				coh. line type × diet				indiv. line type × sex				coh. line type × sex				sex × diet
ITax	Phylum	Family	Genus	present		both	C, SD	C, LQD	H, SD	H, LQD		both	SD	LQD		both	SD	LQD	C	H	C	H	male	female	SC	IVC	CC	CH	HC	HH	C, SD	C, LQD	H, SD	H, LQD	C, SD	C, LQD	H, SD	H, LQD	C, male	C, female	H, male	H, female	C, male	C, female	H, male	H, female	male, SD	male, LQD	female, SD
1	Firmicutes			100		100	100	100	100	100		34.37 ± 6.50	35.14 ± 6.91	32.91 ± 5.52		50.21 ± 6.17	49.88 ± 7.12	50.53 ± 5.10	50.14 ± 6.33	50.28 ± 6.02	50.15 ± 5.88	50.28 ± 6.47	50.24 ± 6.10	50.18 ± 6.26	50.00 ± 6.17	50.45 ± 6.18	50.33 ± 5.72	49.98 ± 6.80	50.01 ± 6.01	50.63 ± 6.04	50.20 ± 7.49	50.09 ± 4.98	49.57 ± 6.74	50.96 ± 5.19	49.68 ± 6.85	50.59 ± 4.79	50.08 ± 7.40	50.47 ± 5.42	50.02 ± 6.33	50.26 ± 6.34	50.46 ± 5.89	50.10 ± 6.18	49.97 ± 5.79	50.34 ± 5.99	50.52 ± 6.41	50.01 ± 6.53	50.32 ± 6.89	50.18 ± 5.28	49.43 ± 7.34
2	Bacteroidota			100		100	100	100	100	100		41.28 ± 6.39	41.78 ± 6.81	40.32 ± 5.55		27.08 ± 5.66	25.69 ± 6.09	28.40 ± 4.87	27.61 ± 5.99	26.56 ± 5.28	27.12 ± 5.24	27.04 ± 6.07	26.86 ± 5.72	27.31 ± 5.59	27.52 ± 5.65	26.58 ± 5.64	27.46 ± 5.31	27.72 ± 6.51	26.84 ± 5.18	26.21 ± 5.40	26.37 ± 6.53	28.80 ± 5.15	25.02 ± 5.56	28.02 ± 4.57	25.70 ± 5.61	28.43 ± 4.51	25.68 ± 6.55	28.37 ± 5.24	27.43 ± 6.22	27.79 ± 5.76	26.31 ± 5.17	26.83 ± 5.40	26.94 ± 5.42	27.31 ± 5.06	26.78 ± 6.03	27.31 ± 6.11	25.24 ± 5.92	28.37 ± 5.10	26.16 ± 6.24
3	Desulfobacterota			100		100	100	100	100	100		6.31 ± 2.87	5.84 ± 2.91	7.19 ± 2.64		9.04 ± 3.97	6.95 ± 3.34	11.04 ± 3.47	8.47 ± 3.93	9.60 ± 3.94	9.10 ± 3.84	8.98 ± 4.11	9.29 ± 4.13	8.78 ± 3.79	8.72 ± 3.82	9.41 ± 4.11	8.41 ± 3.69	8.53 ± 4.13	9.66 ± 3.88	9.52 ± 4.02	6.27 ± 3.13	10.61 ± 3.42	7.63 ± 3.42	11.45 ± 3.48	7.13 ± 3.39	10.93 ± 3.30	6.77 ± 3.29	11.15 ± 3.65	8.87 ± 4.04	8.06 ± 3.78	9.70 ± 4.19	9.50 ± 3.66	9.36 ± 3.98	8.83 ± 3.69	9.22 ± 4.30	8.72 ± 3.89	6.93 ± 3.19	11.50 ± 3.68	6.97 ± 3.50
4	Spirochaetota			50.9091		96.6667	98.2143	95.9538	96.4497	96.1111		0.061 ± 0.275	0.059 ± 0.298	0.066 ± 0.233		4.52 ± 6.56	7.93 ± 7.94	1.27 ± 1.49	4.86 ± 6.85	4.19 ± 6.25	4.56 ± 6.60	4.48 ± 6.52	4.38 ± 6.19	4.67 ± 6.93	4.51 ± 6.65	4.53 ± 6.46	5.10 ± 6.88	4.67 ± 6.83	4.14 ± 6.35	4.25 ± 6.15	8.39 ± 8.23	1.44 ± 1.69	7.46 ± 7.64	1.11 ± 1.23	8.04 ± 8.05	1.34 ± 1.50	7.82 ± 7.85	1.19 ± 1.47	4.62 ± 6.63	5.11 ± 7.07	4.15 ± 5.75	4.22 ± 6.77	4.40 ± 6.43	4.73 ± 6.78	4.36 ± 5.96	4.60 ± 7.09	7.76 ± 7.43	1.22 ± 1.41	8.09 ± 8.46
5	Campilobacterota			98.1818		86.2319	90.4762	94.2197	73.9645	86.1111		6.79 ± 4.94	5.51 ± 4.72	9.22 ± 4.53		2.95 ± 3.28	2.30 ± 2.56	3.57 ± 3.74	3.23 ± 2.97	2.68 ± 3.54	2.90 ± 3.29	3.00 ± 3.28	2.97 ± 3.31	2.93 ± 3.26	3.34 ± 3.62	2.52 ± 2.80	3.31 ± 2.96	3.15 ± 2.98	2.57 ± 3.50	2.82 ± 3.60	2.57 ± 2.24	3.86 ± 3.43	2.03 ± 2.83	3.30 ± 4.01	2.19 ± 2.40	3.56 ± 3.82	2.40 ± 2.71	3.59 ± 3.67	3.44 ± 3.03	3.00 ± 2.90	2.52 ± 3.50	2.86 ± 3.59	2.96 ± 3.25	2.85 ± 3.33	2.99 ± 3.37	3.02 ± 3.18	2.28 ± 2.58	3.62 ± 3.76	2.32 ± 2.55
6	Proteobacteria			100		100	100	100	100	100		4.37 ± 2.43	4.52 ± 2.61	4.09 ± 2.09		2.87 ± 1.99	3.49 ± 2.21	2.28 ± 1.54	2.58 ± 1.77	3.16 ± 2.15	2.88 ± 1.96	2.86 ± 2.02	2.88 ± 1.95	2.86 ± 2.04	2.75 ± 1.91	3.00 ± 2.07	2.55 ± 1.71	2.60 ± 1.83	3.15 ± 2.11	3.17 ± 2.20	2.90 ± 1.88	2.27 ± 1.61	4.08 ± 2.37	2.29 ± 1.46	3.51 ± 2.21	2.30 ± 1.48	3.47 ± 2.22	2.26 ± 1.60	2.53 ± 1.72	2.63 ± 1.83	3.21 ± 2.10	3.10 ± 2.20	2.95 ± 2.09	2.81 ± 1.82	2.80 ± 1.80	2.92 ± 2.24	3.47 ± 2.12	2.33 ± 1.59	3.51 ± 2.31
7	Deferribacterota			74.5455		93.7681	88.0952	99.422	88.7574	98.3333		0.71 ± 1.99	0.34 ± 0.83	1.43 ± 3.11		1.58 ± 1.66	1.50 ± 1.79	1.65 ± 1.53	1.34 ± 1.65	1.81 ± 1.65	1.52 ± 1.60	1.64 ± 1.72	1.56 ± 1.67	1.60 ± 1.65	1.55 ± 1.66	1.61 ± 1.67	1.07 ± 1.37	1.57 ± 1.81	1.87 ± 1.67	1.72 ± 1.61	1.17 ± 1.64	1.51 ± 1.64	1.83 ± 1.88	1.79 ± 1.40	1.44 ± 1.71	1.59 ± 1.49	1.56 ± 1.87	1.72 ± 1.57	1.31 ± 1.65	1.38 ± 1.65	1.80 ± 1.67	1.82 ± 1.63	1.59 ± 1.61	1.44 ± 1.59	1.52 ± 1.74	1.76 ± 1.70	1.61 ± 1.81	1.51 ± 1.54	1.39 ± 1.77
8	Verrucomicrobiota			80		93.7681	99.4048	91.9075	97.0414	87.2222		0.76 ± 0.98	0.97 ± 1.11	0.38 ± 0.50		1.04 ± 1.32	1.62 ± 1.52	0.49 ± 0.75	1.10 ± 1.23	0.98 ± 1.39	1.08 ± 1.45	1.01 ± 1.17	1.07 ± 1.38	1.01 ± 1.25	0.89 ± 1.16	1.21 ± 1.45	1.09 ± 1.38	1.11 ± 1.10	1.06 ± 1.50	0.88 ± 1.23	1.60 ± 1.32	0.63 ± 0.93	1.65 ± 1.70	0.35 ± 0.50	1.72 ± 1.66	0.48 ± 0.87	1.53 ± 1.35	0.49 ± 0.60	1.12 ± 1.33	1.09 ± 1.13	1.02 ± 1.43	0.94 ± 1.35	1.11 ± 1.57	1.04 ± 1.32	1.03 ± 1.16	0.98 ± 1.17	1.67 ± 1.56	0.50 ± 0.87	1.57 ± 1.47
9	Actinobacteriota			98.1818		100	100	100	100	100		1.50 ± 2.60	2.23 ± 2.98	0.14 ± 0.12		0.48 ± 0.65	0.43 ± 0.89	0.53 ± 0.27	0.42 ± 0.36	0.54 ± 0.84	0.48 ± 0.50	0.48 ± 0.78	0.54 ± 0.79	0.42 ± 0.46	0.47 ± 0.66	0.50 ± 0.64	0.43 ± 0.39	0.41 ± 0.33	0.52 ± 0.58	0.57 ± 1.09	0.29 ± 0.38	0.55 ± 0.28	0.58 ± 1.18	0.51 ± 0.26	0.42 ± 0.66	0.53 ± 0.27	0.45 ± 1.07	0.52 ± 0.27	0.43 ± 0.36	0.41 ± 0.35	0.64 ± 1.04	0.43 ± 0.54	0.54 ± 0.59	0.41 ± 0.39	0.54 ± 0.96	0.43 ± 0.52	0.52 ± 1.10	0.55 ± 0.29	0.34 ± 0.59
10	Cyanobacteria			92.7273		91.5942	91.0714	91.3295	94.0828	90		1.21 ± 1.85	1.35 ± 2.08	0.93 ± 1.33		0.19 ± 0.28	0.19 ± 0.30	0.19 ± 0.26	0.21 ± 0.32	0.17 ± 0.24	0.17 ± 0.23	0.21 ± 0.33	0.17 ± 0.28	0.21 ± 0.28	0.22 ± 0.32	0.15 ± 0.22	0.21 ± 0.27	0.21 ± 0.36	0.14 ± 0.18	0.20 ± 0.29	0.22 ± 0.36	0.20 ± 0.26	0.15 ± 0.21	0.18 ± 0.26	0.15 ± 0.21	0.19 ± 0.24	0.22 ± 0.37	0.19 ± 0.28	0.19 ± 0.35	0.23 ± 0.28	0.15 ± 0.20	0.19 ± 0.28	0.14 ± 0.17	0.21 ± 0.27	0.20 ± 0.36	0.21 ± 0.29	0.18 ± 0.36	0.16 ± 0.19	0.20 ± 0.23
11	Patescibacteria			1.81818		81.4493	65.4762	92.4855	74.5562	92.2222		0.0003 ± 0.0020	0.0004 ± 0.0024	0.0000 ± 0.0000		0.037 ± 0.036	0.016 ± 0.017	0.056 ± 0.038	0.038 ± 0.038	0.035 ± 0.033	0.038 ± 0.037	0.035 ± 0.034	0.038 ± 0.040	0.035 ± 0.031	0.036 ± 0.034	0.037 ± 0.037	0.040 ± 0.043	0.036 ± 0.034	0.036 ± 0.032	0.034 ± 0.035	0.017 ± 0.019	0.058 ± 0.041	0.015 ± 0.016	0.054 ± 0.035	0.016 ± 0.016	0.058 ± 0.039	0.017 ± 0.019	0.054 ± 0.036	0.039 ± 0.042	0.036 ± 0.033	0.037 ± 0.037	0.034 ± 0.029	0.040 ± 0.041	0.035 ± 0.032	0.036 ± 0.038	0.035 ± 0.030	0.015 ± 0.017	0.059 ± 0.043	0.017 ± 0.018
13	Fusobacteriota			32.7273		0	0	0	0	0		2.63 ± 4.30	2.27 ± 3.40	3.33 ± 5.67		0 ± 0	0 ± 0	0 ± 0	0 ± 0	0 ± 0	0 ± 0	0 ± 0	0 ± 0	0 ± 0	0 ± 0	0 ± 0	0 ± 0	0 ± 0	0 ± 0	0 ± 0	0 ± 0	0 ± 0	0 ± 0	0 ± 0	0 ± 0	0 ± 0	0 ± 0	0 ± 0	0 ± 0	0 ± 0	0 ± 0	0 ± 0	0 ± 0	0 ± 0	0 ± 0	0 ± 0	0 ± 0	0 ± 0	0 ± 0
12	__			1.81818		0.434783	0	1.15607	0.591716	0		0.0001 ± 0.0008	0.0002 ± 0.0010	0.0000 ± 0.0000		0.0001 ± 0.0009	0.0000 ± 0.0007	0.0001 ± 0.0010	0.0001 ± 0.0010	0.0000 ± 0.0007	0.0001 ± 0.0013	0.0000 ± 0.0000	0.0001 ± 0.0009	0.0000 ± 0.0008	0.0000 ± 0.0007	0.0001 ± 0.0011	0.0002 ± 0.0016	0.0000 ± 0.0000	0.0001 ± 0.0010	0.0000 ± 0.0000	0.0000 ± 0.0000	0.0002 ± 0.0015	0.0001 ± 0.0010	0.0000 ± 0.0000	0.0001 ± 0.0010	0.0001 ± 0.0014	0.0000 ± 0.0000	0.0000 ± 0.0000	0.0001 ± 0.0009	0.0001 ± 0.0012	0.0001 ± 0.0010	0.0000 ± 0.0000	0.0001 ± 0.0013	0.0001 ± 0.0012	0.0000 ± 0.0000	0.0000 ± 0.0000	0.0001 ± 0.0010	0.0001 ± 0.0009	0.0000 ± 0.0000
159	Firmicutes	Lachnospiraceae	Lachnospiraceae_NK4A136_group	32.7273		100	100	100	100	100		1.25 ± 2.79	0.93 ± 2.18	1.86 ± 3.68		8.29 ± 2.65	7.15 ± 2.57	9.38 ± 2.22	8.44 ± 2.77	8.15 ± 2.52	8.39 ± 2.62	8.20 ± 2.67	8.28 ± 2.53	8.31 ± 2.77	8.12 ± 2.45	8.48 ± 2.84	8.65 ± 2.74	8.26 ± 2.79	8.18 ± 2.50	8.12 ± 2.54	7.26 ± 2.79	9.58 ± 2.23	7.05 ± 2.34	9.19 ± 2.21	7.28 ± 2.55	9.42 ± 2.24	7.03 ± 2.60	9.34 ± 2.22	8.45 ± 2.53	8.42 ± 3.00	8.12 ± 2.52	8.20 ± 2.52	8.48 ± 2.48	8.29 ± 2.76	8.08 ± 2.56	8.33 ± 2.79	7.15 ± 2.41	9.33 ± 2.16	7.16 ± 2.74
160	Firmicutes	Lachnospiraceae	uncultured	52.7273		100	100	100	100	100		1.40 ± 2.15	1.28 ± 1.92	1.63 ± 2.57		4.43 ± 2.12	3.02 ± 1.47	5.78 ± 1.74	4.58 ± 2.17	4.29 ± 2.07	4.54 ± 2.22	4.32 ± 2.02	4.47 ± 2.20	4.39 ± 2.05	4.47 ± 2.12	4.39 ± 2.13	4.88 ± 2.37	4.33 ± 1.96	4.27 ± 2.06	4.30 ± 2.09	3.18 ± 1.61	5.94 ± 1.73	2.85 ± 1.29	5.63 ± 1.74	3.16 ± 1.76	5.82 ± 1.80	2.87 ± 1.09	5.74 ± 1.68	4.66 ± 2.23	4.49 ± 2.10	4.28 ± 2.15	4.29 ± 1.99	4.61 ± 2.23	4.47 ± 2.21	4.32 ± 2.15	4.31 ± 1.86	3.01 ± 1.59	5.83 ± 1.77	3.03 ± 1.34
161	Firmicutes	Lachnospiraceae	__	100		100	100	100	100	100		13.77 ± 6.83	15.23 ± 5.37	11.01 ± 8.45		2.35 ± 1.28	2.37 ± 1.54	2.33 ± 0.97	2.36 ± 1.27	2.34 ± 1.30	2.38 ± 1.32	2.32 ± 1.24	2.33 ± 1.27	2.37 ± 1.29	2.36 ± 1.29	2.34 ± 1.27	2.37 ± 1.27	2.35 ± 1.27	2.39 ± 1.37	2.28 ± 1.21	2.34 ± 1.52	2.37 ± 0.96	2.39 ± 1.57	2.29 ± 0.99	2.41 ± 1.62	2.35 ± 0.98	2.32 ± 1.47	2.32 ± 0.97	2.39 ± 1.26	2.32 ± 1.28	2.27 ± 1.29	2.42 ± 1.31	2.35 ± 1.31	2.41 ± 1.34	2.31 ± 1.24	2.33 ± 1.25	2.33 ± 1.53	2.32 ± 0.98	2.40 ± 1.56
162	Firmicutes	Lachnospiraceae	Roseburia	69.0909		99.8551	100	100	100	99.4444		0.51 ± 0.62	0.56 ± 0.60	0.42 ± 0.66		2.32 ± 1.60	1.43 ± 0.95	3.17 ± 1.64	2.47 ± 1.78	2.18 ± 1.39	2.28 ± 1.50	2.36 ± 1.69	2.29 ± 1.49	2.35 ± 1.71	2.24 ± 1.49	2.41 ± 1.72	2.44 ± 1.68	2.49 ± 1.87	2.15 ± 1.34	2.21 ± 1.44	1.55 ± 1.06	3.36 ± 1.89	1.32 ± 0.80	2.97 ± 1.34	1.36 ± 0.77	3.13 ± 1.52	1.51 ± 1.09	3.20 ± 1.76	2.40 ± 1.57	2.54 ± 1.98	2.19 ± 1.40	2.16 ± 1.37	2.25 ± 1.45	2.31 ± 1.56	2.34 ± 1.52	2.38 ± 1.86	1.40 ± 0.86	3.13 ± 1.47	1.47 ± 1.03
163	Firmicutes	Lachnospiraceae	Lachnospiraceae_UCG-001	52.7273		98.5507	97.0238	98.8439	98.2249	100		0.12 ± 0.17	0.10 ± 0.14	0.15 ± 0.21		1.55 ± 1.29	1.79 ± 1.38	1.32 ± 1.15	1.64 ± 1.37	1.46 ± 1.20	1.47 ± 1.20	1.63 ± 1.37	1.55 ± 1.32	1.55 ± 1.26	1.58 ± 1.26	1.51 ± 1.32	1.50 ± 1.20	1.76 ± 1.49	1.45 ± 1.20	1.47 ± 1.21	1.95 ± 1.38	1.34 ± 1.30	1.63 ± 1.37	1.31 ± 0.99	1.66 ± 1.37	1.30 ± 0.99	1.91 ± 1.39	1.35 ± 1.30	1.61 ± 1.38	1.67 ± 1.37	1.48 ± 1.26	1.43 ± 1.13	1.48 ± 1.32	1.47 ± 1.07	1.62 ± 1.33	1.63 ± 1.43	1.78 ± 1.43	1.33 ± 1.18	1.80 ± 1.34
164	Firmicutes	Lachnospiraceae	Blautia	83.6364		98.8406	97.619	99.422	98.8166	99.4444		2.79 ± 3.41	2.02 ± 2.47	4.25 ± 4.42		0.69 ± 0.67	0.75 ± 0.65	0.63 ± 0.69	0.75 ± 0.70	0.63 ± 0.64	0.71 ± 0.71	0.67 ± 0.64	0.65 ± 0.65	0.73 ± 0.70	0.66 ± 0.66	0.72 ± 0.68	0.77 ± 0.74	0.74 ± 0.67	0.66 ± 0.68	0.59 ± 0.58	0.84 ± 0.68	0.67 ± 0.72	0.66 ± 0.61	0.60 ± 0.66	0.80 ± 0.72	0.62 ± 0.68	0.70 ± 0.57	0.64 ± 0.70	0.72 ± 0.69	0.79 ± 0.72	0.59 ± 0.60	0.67 ± 0.67	0.71 ± 0.73	0.71 ± 0.69	0.59 ± 0.55	0.75 ± 0.71	0.75 ± 0.67	0.56 ± 0.62	0.75 ± 0.63
165	Firmicutes	Lachnospiraceae	Lachnoclostridium	90.9091		100	100	100	100	100		2.38 ± 1.87	2.06 ± 1.87	3.00 ± 1.75		0.53 ± 0.44	0.25 ± 0.18	0.79 ± 0.45	0.54 ± 0.46	0.51 ± 0.42	0.55 ± 0.47	0.51 ± 0.41	0.55 ± 0.47	0.51 ± 0.40	0.54 ± 0.47	0.51 ± 0.40	0.60 ± 0.54	0.50 ± 0.37	0.51 ± 0.39	0.52 ± 0.46	0.27 ± 0.20	0.81 ± 0.48	0.23 ± 0.16	0.78 ± 0.42	0.25 ± 0.17	0.83 ± 0.48	0.26 ± 0.20	0.75 ± 0.42	0.59 ± 0.52	0.49 ± 0.38	0.50 ± 0.42	0.52 ± 0.42	0.59 ± 0.54	0.51 ± 0.38	0.51 ± 0.40	0.50 ± 0.43	0.24 ± 0.20	0.83 ± 0.48	0.26 ± 0.17
166	Firmicutes	Lachnospiraceae	A2	1.81818		93.4783	83.9286	98.2659	91.716	99.4444		0.0056 ± 0.0415	0.0085 ± 0.0512	0.0000 ± 0.0000		0.50 ± 0.65	0.14 ± 0.29	0.84 ± 0.71	0.53 ± 0.73	0.47 ± 0.56	0.50 ± 0.70	0.49 ± 0.60	0.49 ± 0.64	0.51 ± 0.66	0.52 ± 0.63	0.47 ± 0.67	0.59 ± 0.84	0.48 ± 0.62	0.44 ± 0.55	0.50 ± 0.58	0.15 ± 0.37	0.90 ± 0.80	0.13 ± 0.18	0.78 ± 0.61	0.14 ± 0.35	0.85 ± 0.76	0.14 ± 0.23	0.83 ± 0.65	0.52 ± 0.70	0.53 ± 0.76	0.46 ± 0.57	0.48 ± 0.55	0.50 ± 0.70	0.51 ± 0.70	0.48 ± 0.57	0.50 ± 0.62	0.14 ± 0.36	0.81 ± 0.67	0.13 ± 0.19
167	Firmicutes	Lachnospiraceae	[Eubacterium]_xylanophilum_group	0		97.3913	97.0238	97.1098	97.6331	97.7778		0 ± 0	0 ± 0	0 ± 0		0.48 ± 0.38	0.30 ± 0.23	0.66 ± 0.41	0.51 ± 0.41	0.45 ± 0.35	0.48 ± 0.38	0.48 ± 0.38	0.49 ± 0.39	0.47 ± 0.37	0.44 ± 0.34	0.52 ± 0.42	0.51 ± 0.41	0.51 ± 0.40	0.46 ± 0.35	0.45 ± 0.35	0.32 ± 0.27	0.69 ± 0.44	0.27 ± 0.19	0.62 ± 0.38	0.30 ± 0.24	0.65 ± 0.40	0.29 ± 0.22	0.66 ± 0.42	0.54 ± 0.43	0.48 ± 0.38	0.44 ± 0.34	0.47 ± 0.36	0.47 ± 0.36	0.50 ± 0.40	0.51 ± 0.42	0.45 ± 0.34	0.31 ± 0.24	0.65 ± 0.43	0.28 ± 0.23
168	Firmicutes	Lachnospiraceae	Lachnospiraceae_UCG-006	50.9091		99.4203	98.8095	100	98.8166	100		0.58 ± 0.93	0.40 ± 0.58	0.92 ± 1.32		0.41 ± 0.40	0.25 ± 0.31	0.58 ± 0.41	0.45 ± 0.44	0.38 ± 0.36	0.42 ± 0.39	0.41 ± 0.41	0.43 ± 0.43	0.40 ± 0.37	0.42 ± 0.39	0.40 ± 0.41	0.48 ± 0.45	0.43 ± 0.43	0.37 ± 0.32	0.39 ± 0.39	0.27 ± 0.35	0.62 ± 0.45	0.22 ± 0.27	0.53 ± 0.36	0.25 ± 0.32	0.58 ± 0.38	0.25 ± 0.30	0.57 ± 0.44	0.48 ± 0.48	0.42 ± 0.39	0.38 ± 0.36	0.39 ± 0.35	0.42 ± 0.42	0.41 ± 0.35	0.43 ± 0.43	0.40 ± 0.40	0.25 ± 0.33	0.59 ± 0.44	0.25 ± 0.28
169	Firmicutes	Lachnospiraceae	Tyzzerella	3.63636		97.1014	97.0238	98.2659	96.4497	96.6667		0.0044 ± 0.0240	0.0068 ± 0.0295	0.0000 ± 0.0000		0.41 ± 0.38	0.49 ± 0.43	0.34 ± 0.31	0.40 ± 0.38	0.41 ± 0.38	0.39 ± 0.37	0.43 ± 0.40	0.43 ± 0.41	0.39 ± 0.35	0.41 ± 0.37	0.41 ± 0.40	0.38 ± 0.37	0.42 ± 0.40	0.40 ± 0.36	0.43 ± 0.40	0.45 ± 0.42	0.36 ± 0.34	0.53 ± 0.43	0.31 ± 0.28	0.47 ± 0.41	0.32 ± 0.30	0.50 ± 0.44	0.36 ± 0.33	0.44 ± 0.43	0.37 ± 0.33	0.42 ± 0.40	0.41 ± 0.36	0.40 ± 0.40	0.38 ± 0.32	0.45 ± 0.42	0.40 ± 0.37	0.49 ± 0.45	0.37 ± 0.37	0.49 ± 0.41
170	Firmicutes	Lachnospiraceae	ASF356	3.63636		86.9565	94.0476	85.5491	87.574	81.1111		0.047 ± 0.248	0.072 ± 0.305	0.000 ± 0.000		0.34 ± 0.45	0.48 ± 0.55	0.20 ± 0.27	0.35 ± 0.43	0.32 ± 0.47	0.33 ± 0.43	0.34 ± 0.48	0.29 ± 0.39	0.38 ± 0.51	0.32 ± 0.44	0.36 ± 0.47	0.35 ± 0.43	0.36 ± 0.44	0.32 ± 0.43	0.32 ± 0.52	0.48 ± 0.53	0.23 ± 0.27	0.48 ± 0.57	0.17 ± 0.27	0.48 ± 0.52	0.19 ± 0.24	0.47 ± 0.58	0.21 ± 0.30	0.31 ± 0.40	0.40 ± 0.46	0.28 ± 0.37	0.36 ± 0.55	0.29 ± 0.36	0.38 ± 0.48	0.30 ± 0.42	0.39 ± 0.53	0.41 ± 0.47	0.19 ± 0.24	0.54 ± 0.61
171	Firmicutes	Lachnospiraceae	Coprococcus	0		22.1739	16.0714	17.341	23.0769	31.6667		0 ± 0	0 ± 0	0 ± 0		0.30 ± 1.26	0.47 ± 1.74	0.15 ± 0.39	0.22 ± 0.98	0.38 ± 1.47	0.22 ± 0.87	0.39 ± 1.55	0.27 ± 1.16	0.34 ± 1.35	0.33 ± 1.39	0.27 ± 1.09	0.17 ± 0.81	0.27 ± 1.11	0.26 ± 0.92	0.54 ± 1.95	0.34 ± 1.35	0.11 ± 0.35	0.59 ± 2.05	0.19 ± 0.43	0.31 ± 1.19	0.13 ± 0.36	0.63 ± 2.14	0.17 ± 0.43	0.17 ± 0.74	0.28 ± 1.18	0.37 ± 1.44	0.40 ± 1.51	0.26 ± 0.98	0.18 ± 0.74	0.29 ± 1.32	0.51 ± 1.76	0.42 ± 1.61	0.13 ± 0.36	0.52 ± 1.86
172	Firmicutes	Lachnospiraceae	Acetatifactor	1.81818		80.2899	70.8333	84.3931	75.1479	90		0.0007 ± 0.0049	0.0010 ± 0.0060	0.0000 ± 0.0000		0.26 ± 0.55	0.13 ± 0.29	0.38 ± 0.70	0.21 ± 0.46	0.30 ± 0.62	0.26 ± 0.50	0.26 ± 0.60	0.25 ± 0.49	0.27 ± 0.61	0.28 ± 0.61	0.23 ± 0.48	0.28 ± 0.58	0.16 ± 0.33	0.25 ± 0.43	0.37 ± 0.80	0.12 ± 0.32	0.30 ± 0.56	0.14 ± 0.26	0.46 ± 0.80	0.15 ± 0.31	0.36 ± 0.61	0.11 ± 0.27	0.40 ± 0.78	0.21 ± 0.45	0.21 ± 0.48	0.28 ± 0.53	0.33 ± 0.71	0.23 ± 0.44	0.29 ± 0.56	0.27 ± 0.55	0.24 ± 0.66	0.13 ± 0.34	0.36 ± 0.58	0.13 ± 0.23
173	Firmicutes	Lachnospiraceae	GCA-900066575	1.81818		95.942	89.2857	100	94.6746	99.4444		0.0011 ± 0.0080	0.0017 ± 0.0099	0.0000 ± 0.0000		0.20 ± 0.20	0.06 ± 0.12	0.34 ± 0.15	0.21 ± 0.21	0.20 ± 0.19	0.20 ± 0.18	0.20 ± 0.21	0.21 ± 0.22	0.20 ± 0.17	0.22 ± 0.21	0.18 ± 0.17	0.22 ± 0.20	0.20 ± 0.21	0.19 ± 0.16	0.21 ± 0.21	0.07 ± 0.17	0.34 ± 0.15	0.05 ± 0.05	0.34 ± 0.16	0.07 ± 0.10	0.33 ± 0.14	0.06 ± 0.15	0.34 ± 0.16	0.22 ± 0.24	0.19 ± 0.17	0.19 ± 0.19	0.20 ± 0.18	0.21 ± 0.19	0.20 ± 0.17	0.21 ± 0.24	0.20 ± 0.18	0.06 ± 0.14	0.35 ± 0.18	0.07 ± 0.10
174	Firmicutes	Lachnospiraceae	Lachnospiraceae_NK4B4_group	0		83.4783	72.0238	94.2197	72.7811	93.8889		0 ± 0	0 ± 0	0 ± 0		0.15 ± 0.17	0.04 ± 0.05	0.26 ± 0.18	0.16 ± 0.18	0.14 ± 0.16	0.16 ± 0.18	0.14 ± 0.16	0.15 ± 0.18	0.15 ± 0.17	0.15 ± 0.17	0.15 ± 0.17	0.18 ± 0.20	0.15 ± 0.17	0.15 ± 0.17	0.13 ± 0.15	0.04 ± 0.06	0.28 ± 0.19	0.04 ± 0.05	0.24 ± 0.17	0.05 ± 0.06	0.27 ± 0.19	0.04 ± 0.04	0.24 ± 0.17	0.16 ± 0.18	0.16 ± 0.18	0.14 ± 0.17	0.14 ± 0.15	0.16 ± 0.18	0.16 ± 0.19	0.14 ± 0.17	0.14 ± 0.14	0.04 ± 0.05	0.25 ± 0.19	0.05 ± 0.05
175	Firmicutes	Lachnospiraceae	Lachnospira	3.63636		62.4638	74.4048	57.8035	75.7396	43.3333		0.0063 ± 0.0389	0.0078 ± 0.0470	0.0034 ± 0.0147		0.096 ± 0.163	0.147 ± 0.196	0.048 ± 0.103	0.109 ± 0.182	0.084 ± 0.141	0.101 ± 0.180	0.092 ± 0.143	0.093 ± 0.158	0.099 ± 0.168	0.093 ± 0.157	0.099 ± 0.170	0.120 ± 0.214	0.100 ± 0.151	0.086 ± 0.147	0.081 ± 0.133	0.160 ± 0.220	0.059 ± 0.117	0.133 ± 0.168	0.037 ± 0.088	0.159 ± 0.216	0.047 ± 0.116	0.135 ± 0.173	0.049 ± 0.088	0.108 ± 0.193	0.111 ± 0.171	0.080 ± 0.115	0.088 ± 0.164	0.098 ± 0.185	0.103 ± 0.176	0.089 ± 0.126	0.095 ± 0.160	0.149 ± 0.197	0.041 ± 0.083	0.144 ± 0.195
176	Firmicutes	Lachnospiraceae	Tuzzerella	0		92.3188	86.9048	97.6879	88.1657	96.1111		0 ± 0	0 ± 0	0 ± 0		0.085 ± 0.093	0.040 ± 0.044	0.129 ± 0.105	0.088 ± 0.087	0.083 ± 0.098	0.081 ± 0.083	0.089 ± 0.101	0.081 ± 0.093	0.090 ± 0.092	0.099 ± 0.108	0.070 ± 0.069	0.088 ± 0.090	0.087 ± 0.084	0.076 ± 0.077	0.091 ± 0.119	0.042 ± 0.047	0.132 ± 0.094	0.037 ± 0.041	0.126 ± 0.115	0.035 ± 0.036	0.124 ± 0.092	0.044 ± 0.051	0.134 ± 0.117	0.085 ± 0.090	0.091 ± 0.084	0.077 ± 0.096	0.089 ± 0.099	0.078 ± 0.085	0.085 ± 0.082	0.084 ± 0.101	0.095 ± 0.101	0.042 ± 0.053	0.117 ± 0.107	0.038 ± 0.033
177	Firmicutes	Lachnospiraceae	Lachnospiraceae_FCS020_group	1.81818		89.1304	80.3571	95.3757	83.432	96.6667		0.0025 ± 0.0188	0.0039 ± 0.0232	0.0000 ± 0.0000		0.082 ± 0.159	0.028 ± 0.073	0.134 ± 0.197	0.082 ± 0.162	0.082 ± 0.156	0.079 ± 0.146	0.085 ± 0.172	0.076 ± 0.144	0.089 ± 0.174	0.094 ± 0.172	0.069 ± 0.142	0.075 ± 0.115	0.088 ± 0.193	0.083 ± 0.167	0.081 ± 0.144	0.029 ± 0.088	0.133 ± 0.198	0.026 ± 0.055	0.134 ± 0.198	0.026 ± 0.053	0.129 ± 0.182	0.030 ± 0.089	0.139 ± 0.212	0.087 ± 0.170	0.077 ± 0.154	0.065 ± 0.113	0.100 ± 0.192	0.065 ± 0.085	0.094 ± 0.188	0.087 ± 0.185	0.083 ± 0.158	0.028 ± 0.088	0.120 ± 0.169	0.027 ± 0.053
178	Firmicutes	Lachnospiraceae	Acetitomaculum	1.81818		73.0435	85.119	59.5376	88.7574	60		0.0016 ± 0.0116	0.0000 ± 0.0000	0.0045 ± 0.0198		0.055 ± 0.068	0.065 ± 0.056	0.046 ± 0.076	0.053 ± 0.067	0.057 ± 0.068	0.053 ± 0.065	0.057 ± 0.070	0.049 ± 0.062	0.061 ± 0.073	0.052 ± 0.065	0.059 ± 0.071	0.047 ± 0.064	0.058 ± 0.070	0.058 ± 0.066	0.056 ± 0.070	0.057 ± 0.050	0.049 ± 0.080	0.073 ± 0.060	0.042 ± 0.072	0.067 ± 0.058	0.040 ± 0.069	0.063 ± 0.053	0.051 ± 0.083	0.048 ± 0.060	0.058 ± 0.074	0.051 ± 0.063	0.064 ± 0.072	0.043 ± 0.052	0.064 ± 0.076	0.056 ± 0.070	0.058 ± 0.070	0.063 ± 0.054	0.037 ± 0.066	0.067 ± 0.058
179	Firmicutes	Lachnospiraceae	Oribacterium	0		65.0725	39.2857	82.0809	47.929	88.8889		0 ± 0	0 ± 0	0 ± 0		0.043 ± 0.064	0.014 ± 0.032	0.072 ± 0.073	0.037 ± 0.060	0.049 ± 0.067	0.044 ± 0.065	0.043 ± 0.063	0.048 ± 0.073	0.039 ± 0.052	0.047 ± 0.070	0.040 ± 0.056	0.040 ± 0.063	0.036 ± 0.058	0.047 ± 0.066	0.052 ± 0.068	0.013 ± 0.035	0.061 ± 0.070	0.015 ± 0.029	0.082 ± 0.076	0.015 ± 0.036	0.070 ± 0.074	0.013 ± 0.028	0.073 ± 0.074	0.043 ± 0.073	0.032 ± 0.042	0.053 ± 0.073	0.046 ± 0.059	0.048 ± 0.071	0.040 ± 0.058	0.048 ± 0.076	0.037 ± 0.046	0.016 ± 0.040	0.078 ± 0.084	0.012 ± 0.022
180	Firmicutes	Lachnospiraceae	Lachnospiraceae_AC2044_group	0		70.1449	59.5238	79.1908	57.9882	82.7778		0 ± 0	0 ± 0	0 ± 0		0.022 ± 0.034	0.013 ± 0.032	0.031 ± 0.034	0.024 ± 0.039	0.020 ± 0.028	0.022 ± 0.035	0.022 ± 0.034	0.023 ± 0.038	0.021 ± 0.030	0.023 ± 0.035	0.021 ± 0.033	0.025 ± 0.044	0.023 ± 0.035	0.020 ± 0.025	0.021 ± 0.032	0.014 ± 0.037	0.034 ± 0.039	0.013 ± 0.026	0.028 ± 0.029	0.014 ± 0.036	0.029 ± 0.033	0.012 ± 0.028	0.032 ± 0.036	0.027 ± 0.047	0.021 ± 0.030	0.020 ± 0.026	0.020 ± 0.030	0.025 ± 0.043	0.019 ± 0.023	0.022 ± 0.032	0.022 ± 0.035	0.015 ± 0.036	0.032 ± 0.038	0.011 ± 0.027
181	Firmicutes	Lachnospiraceae	[Ruminococcus]_gauvreauii_group	0		22.3188	24.4048	25.4335	17.1598	22.2222		0 ± 0	0 ± 0	0 ± 0		0.012 ± 0.041	0.009 ± 0.030	0.015 ± 0.050	0.016 ± 0.052	0.008 ± 0.027	0.013 ± 0.046	0.011 ± 0.035	0.012 ± 0.048	0.012 ± 0.034	0.010 ± 0.040	0.014 ± 0.043	0.019 ± 0.064	0.013 ± 0.039	0.008 ± 0.024	0.008 ± 0.030	0.011 ± 0.032	0.020 ± 0.065	0.007 ± 0.028	0.010 ± 0.026	0.009 ± 0.028	0.017 ± 0.058	0.009 ± 0.032	0.013 ± 0.039	0.015 ± 0.062	0.016 ± 0.040	0.008 ± 0.028	0.009 ± 0.026	0.014 ± 0.059	0.012 ± 0.028	0.009 ± 0.032	0.013 ± 0.039	0.008 ± 0.034	0.015 ± 0.058	0.010 ± 0.026
182	Firmicutes	Lachnospiraceae	[Ruminococcus]_torques_group	0		32.4638	31.5476	44.5087	26.0355	27.7778		0 ± 0	0 ± 0	0 ± 0		0.011 ± 0.028	0.008 ± 0.021	0.014 ± 0.033	0.014 ± 0.031	0.008 ± 0.024	0.010 ± 0.026	0.012 ± 0.030	0.013 ± 0.030	0.010 ± 0.026	0.010 ± 0.026	0.012 ± 0.030	0.015 ± 0.032	0.014 ± 0.030	0.007 ± 0.019	0.009 ± 0.029	0.010 ± 0.025	0.019 ± 0.035	0.006 ± 0.014	0.010 ± 0.030	0.009 ± 0.025	0.012 ± 0.027	0.006 ± 0.015	0.017 ± 0.038	0.017 ± 0.034	0.012 ± 0.028	0.009 ± 0.025	0.007 ± 0.023	0.013 ± 0.032	0.008 ± 0.018	0.013 ± 0.028	0.011 ± 0.032	0.009 ± 0.025	0.016 ± 0.033	0.006 ± 0.015
184	Firmicutes	Lachnospiraceae	Eisenbergiella	0		49.4203	26.7857	66.474	27.2189	75		0 ± 0	0 ± 0	0 ± 0		0.0100 ± 0.0151	0.0037 ± 0.0081	0.0159 ± 0.0177	0.0085 ± 0.0120	0.0114 ± 0.0176	0.0108 ± 0.0165	0.0091 ± 0.0135	0.0105 ± 0.0148	0.0094 ± 0.0155	0.0105 ± 0.0172	0.0094 ± 0.0125	0.0096 ± 0.0125	0.0075 ± 0.0115	0.0117 ± 0.0192	0.0110 ± 0.0155	0.0030 ± 0.0062	0.0138 ± 0.0137	0.0044 ± 0.0095	0.0180 ± 0.0207	0.0041 ± 0.0090	0.0170 ± 0.0193	0.0033 ± 0.0071	0.0148 ± 0.0158	0.0089 ± 0.0126	0.0080 ± 0.0113	0.0120 ± 0.0164	0.0107 ± 0.0188	0.0107 ± 0.0145	0.0109 ± 0.0185	0.0103 ± 0.0151	0.0078 ± 0.0116	0.0044 ± 0.0092	0.0162 ± 0.0166	0.0030 ± 0.0066
186	Firmicutes	Lachnospiraceae	Lachnospiraceae_UCG-010	1.81818		21.3043	27.381	19.6532	26.0355	12.7778		0.0010 ± 0.0076	0.0016 ± 0.0093	0.0000 ± 0.0000		0.0025 ± 0.0061	0.0030 ± 0.0064	0.0020 ± 0.0057	0.0030 ± 0.0071	0.0019 ± 0.0047	0.0025 ± 0.0062	0.0025 ± 0.0059	0.0024 ± 0.0055	0.0026 ± 0.0066	0.0022 ± 0.0060	0.0028 ± 0.0061	0.0029 ± 0.0073	0.0032 ± 0.0070	0.0021 ± 0.0052	0.0017 ± 0.0041	0.0037 ± 0.0076	0.0025 ± 0.0066	0.0024 ± 0.0048	0.0015 ± 0.0046	0.0031 ± 0.0061	0.0019 ± 0.0063	0.0029 ± 0.0067	0.0021 ± 0.0050	0.0032 ± 0.0065	0.0029 ± 0.0078	0.0017 ± 0.0042	0.0022 ± 0.0053	0.0025 ± 0.0057	0.0025 ± 0.0068	0.0024 ± 0.0053	0.0026 ± 0.0065	0.0030 ± 0.0059	0.0019 ± 0.0050	0.0031 ± 0.0069
187	Firmicutes	Lachnospiraceae	[Eubacterium]_fissicatena_group	0		22.3188	12.5	23.6994	15.3846	36.6667		0 ± 0	0 ± 0	0 ± 0		0.0023 ± 0.0050	0.0011 ± 0.0029	0.0035 ± 0.0062	0.0017 ± 0.0041	0.0029 ± 0.0057	0.0023 ± 0.0052	0.0023 ± 0.0049	0.0028 ± 0.0056	0.0018 ± 0.0043	0.0023 ± 0.0050	0.0023 ± 0.0051	0.0016 ± 0.0042	0.0018 ± 0.0041	0.0030 ± 0.0058	0.0029 ± 0.0056	0.0009 ± 0.0026	0.0025 ± 0.0051	0.0013 ± 0.0032	0.0045 ± 0.0070	0.0009 ± 0.0026	0.0037 ± 0.0065	0.0013 ± 0.0032	0.0032 ± 0.0059	0.0019 ± 0.0045	0.0014 ± 0.0037	0.0036 ± 0.0063	0.0022 ± 0.0049	0.0026 ± 0.0056	0.0021 ± 0.0047	0.0030 ± 0.0055	0.0015 ± 0.0039	0.0014 ± 0.0034	0.0041 ± 0.0068	0.0007 ± 0.0023
196	Firmicutes	Oscillospiraceae	uncultured	49.0909		100	100	100	100	100		1.38 ± 2.50	0.70 ± 1.12	2.67 ± 3.69		3.63 ± 1.61	2.77 ± 1.24	4.46 ± 1.49	3.79 ± 1.66	3.48 ± 1.56	3.60 ± 1.59	3.67 ± 1.63	3.56 ± 1.66	3.70 ± 1.56	3.72 ± 1.65	3.53 ± 1.57	3.85 ± 1.65	3.74 ± 1.66	3.40 ± 1.52	3.58 ± 1.60	2.92 ± 1.32	4.63 ± 1.50	2.62 ± 1.13	4.29 ± 1.47	2.70 ± 1.18	4.43 ± 1.48	2.83 ± 1.30	4.49 ± 1.51	3.71 ± 1.72	3.87 ± 1.59	3.43 ± 1.61	3.54 ± 1.51	3.56 ± 1.65	3.63 ± 1.54	3.57 ± 1.69	3.77 ± 1.58	2.65 ± 1.21	4.42 ± 1.58	2.89 ± 1.26
197	Firmicutes	Oscillospiraceae	Colidextribacter	34.5455		100	100	100	100	100		0.14 ± 0.33	0.11 ± 0.31	0.19 ± 0.37		0.65 ± 0.43	0.29 ± 0.14	0.99 ± 0.34	0.64 ± 0.43	0.66 ± 0.44	0.65 ± 0.43	0.65 ± 0.44	0.65 ± 0.44	0.65 ± 0.43	0.67 ± 0.44	0.63 ± 0.42	0.65 ± 0.43	0.64 ± 0.43	0.65 ± 0.43	0.67 ± 0.45	0.29 ± 0.12	0.99 ± 0.32	0.30 ± 0.15	1.00 ± 0.35	0.29 ± 0.15	0.98 ± 0.33	0.29 ± 0.12	1.01 ± 0.34	0.65 ± 0.43	0.63 ± 0.43	0.66 ± 0.45	0.66 ± 0.43	0.66 ± 0.43	0.64 ± 0.43	0.65 ± 0.45	0.66 ± 0.44	0.30 ± 0.15	0.99 ± 0.34	0.29 ± 0.12
198	Firmicutes	Oscillospiraceae	Oscillibacter	7.27273		100	100	100	100	100		0.055 ± 0.238	0.035 ± 0.146	0.092 ± 0.356		0.56 ± 0.36	0.45 ± 0.34	0.67 ± 0.34	0.53 ± 0.35	0.60 ± 0.37	0.56 ± 0.38	0.57 ± 0.34	0.53 ± 0.33	0.60 ± 0.39	0.60 ± 0.39	0.52 ± 0.32	0.55 ± 0.40	0.52 ± 0.30	0.57 ± 0.36	0.63 ± 0.38	0.43 ± 0.36	0.63 ± 0.31	0.47 ± 0.32	0.71 ± 0.37	0.43 ± 0.37	0.68 ± 0.35	0.46 ± 0.32	0.67 ± 0.34	0.50 ± 0.33	0.56 ± 0.37	0.55 ± 0.34	0.64 ± 0.40	0.50 ± 0.30	0.62 ± 0.44	0.55 ± 0.36	0.58 ± 0.32	0.42 ± 0.30	0.63 ± 0.33	0.48 ± 0.38
199	Firmicutes	Oscillospiraceae	UCG-005	0		96.5217	95.8333	97.1098	94.6746	98.3333		0 ± 0	0 ± 0	0 ± 0		0.31 ± 0.23	0.30 ± 0.22	0.31 ± 0.24	0.32 ± 0.24	0.30 ± 0.22	0.30 ± 0.23	0.32 ± 0.24	0.29 ± 0.24	0.32 ± 0.22	0.29 ± 0.23	0.32 ± 0.24	0.29 ± 0.22	0.33 ± 0.25	0.31 ± 0.23	0.29 ± 0.21	0.31 ± 0.22	0.32 ± 0.26	0.29 ± 0.22	0.31 ± 0.22	0.29 ± 0.23	0.31 ± 0.23	0.31 ± 0.22	0.32 ± 0.25	0.31 ± 0.26	0.32 ± 0.22	0.28 ± 0.22	0.32 ± 0.22	0.28 ± 0.23	0.33 ± 0.22	0.31 ± 0.25	0.32 ± 0.23	0.28 ± 0.22	0.31 ± 0.26	0.33 ± 0.22
200	Firmicutes	Oscillospiraceae	UCG-003	1.81818		99.7101	100	100	99.4083	99.4444		0.0040 ± 0.0296	0.0000 ± 0.0000	0.0116 ± 0.0504		0.21 ± 0.14	0.21 ± 0.14	0.22 ± 0.14	0.25 ± 0.16	0.18 ± 0.11	0.21 ± 0.14	0.21 ± 0.15	0.21 ± 0.14	0.22 ± 0.14	0.22 ± 0.14	0.21 ± 0.15	0.26 ± 0.15	0.25 ± 0.16	0.18 ± 0.11	0.17 ± 0.11	0.25 ± 0.16	0.26 ± 0.16	0.17 ± 0.11	0.18 ± 0.11	0.20 ± 0.13	0.23 ± 0.14	0.22 ± 0.15	0.21 ± 0.14	0.25 ± 0.16	0.26 ± 0.16	0.17 ± 0.10	0.18 ± 0.12	0.21 ± 0.14	0.22 ± 0.14	0.21 ± 0.14	0.22 ± 0.15	0.20 ± 0.14	0.21 ± 0.14	0.21 ± 0.15
201	Firmicutes	Oscillospiraceae	NK4A214_group	0		97.5362	97.0238	98.8439	95.2663	98.8889		0 ± 0	0 ± 0	0 ± 0		0.18 ± 0.15	0.07 ± 0.05	0.28 ± 0.14	0.18 ± 0.15	0.18 ± 0.15	0.18 ± 0.15	0.18 ± 0.15	0.19 ± 0.16	0.17 ± 0.13	0.17 ± 0.14	0.19 ± 0.16	0.17 ± 0.13	0.18 ± 0.16	0.19 ± 0.17	0.18 ± 0.13	0.08 ± 0.06	0.27 ± 0.14	0.07 ± 0.04	0.29 ± 0.14	0.07 ± 0.05	0.28 ± 0.14	0.07 ± 0.05	0.28 ± 0.13	0.18 ± 0.16	0.17 ± 0.13	0.19 ± 0.16	0.18 ± 0.14	0.19 ± 0.16	0.18 ± 0.14	0.18 ± 0.16	0.17 ± 0.13	0.07 ± 0.05	0.30 ± 0.15	0.08 ± 0.05
202	Firmicutes	Oscillospiraceae	__	3.63636		77.8261	57.7381	87.8613	70.4142	93.8889		0.0015 ± 0.0107	0.0000 ± 0.0003	0.0042 ± 0.0182		0.034 ± 0.055	0.019 ± 0.053	0.048 ± 0.052	0.028 ± 0.057	0.040 ± 0.051	0.034 ± 0.061	0.034 ± 0.047	0.036 ± 0.061	0.032 ± 0.047	0.035 ± 0.048	0.032 ± 0.062	0.031 ± 0.075	0.026 ± 0.037	0.036 ± 0.047	0.044 ± 0.056	0.017 ± 0.067	0.039 ± 0.043	0.021 ± 0.033	0.057 ± 0.059	0.021 ± 0.068	0.046 ± 0.050	0.018 ± 0.031	0.051 ± 0.054	0.034 ± 0.073	0.023 ± 0.033	0.038 ± 0.046	0.041 ± 0.057	0.037 ± 0.073	0.031 ± 0.045	0.035 ± 0.046	0.034 ± 0.049	0.021 ± 0.068	0.050 ± 0.050	0.017 ± 0.031
203	Firmicutes	Oscillospiraceae	UCG-002	0		33.6232	40.4762	39.3064	27.8107	27.2222		0 ± 0	0 ± 0	0 ± 0		0.033 ± 0.102	0.024 ± 0.076	0.041 ± 0.121	0.043 ± 0.118	0.022 ± 0.081	0.023 ± 0.071	0.042 ± 0.125	0.032 ± 0.114	0.034 ± 0.088	0.028 ± 0.093	0.038 ± 0.111	0.034 ± 0.089	0.051 ± 0.138	0.015 ± 0.052	0.031 ± 0.107	0.031 ± 0.088	0.055 ± 0.141	0.017 ± 0.061	0.028 ± 0.096	0.018 ± 0.047	0.028 ± 0.088	0.029 ± 0.096	0.055 ± 0.148	0.045 ± 0.138	0.042 ± 0.094	0.019 ± 0.082	0.025 ± 0.081	0.017 ± 0.048	0.030 ± 0.089	0.047 ± 0.152	0.037 ± 0.087	0.023 ± 0.082	0.040 ± 0.136	0.024 ± 0.069
204	Firmicutes	Oscillospiraceae	UCG-007	0		17.3913	0	30.6358	0.591716	36.6667		0 ± 0	0 ± 0	0 ± 0		0.0024 ± 0.0060	0.0000 ± 0.0004	0.0048 ± 0.0077	0.0020 ± 0.0052	0.0029 ± 0.0067	0.0021 ± 0.0059	0.0028 ± 0.0061	0.0021 ± 0.0055	0.0028 ± 0.0065	0.0023 ± 0.0058	0.0026 ± 0.0062	0.0017 ± 0.0052	0.0022 ± 0.0051	0.0024 ± 0.0064	0.0036 ± 0.0071	0.0000 ± 0.0000	0.0039 ± 0.0067	0.0000 ± 0.0005	0.0056 ± 0.0085	0.0000 ± 0.0005	0.0040 ± 0.0077	0.0000 ± 0.0000	0.0056 ± 0.0077	0.0015 ± 0.0039	0.0024 ± 0.0062	0.0027 ± 0.0066	0.0031 ± 0.0069	0.0018 ± 0.0054	0.0023 ± 0.0064	0.0024 ± 0.0056	0.0033 ± 0.0066	0.0000 ± 0.0005	0.0041 ± 0.0071	0.0000 ± 0.0000
205	Firmicutes	Oscillospiraceae	Flavonifractor	0		21.1594	17.2619	25.4335	15.9763	25.5556		0 ± 0	0 ± 0	0 ± 0		0.0023 ± 0.0053	0.0015 ± 0.0038	0.0030 ± 0.0063	0.0023 ± 0.0053	0.0022 ± 0.0053	0.0021 ± 0.0053	0.0024 ± 0.0053	0.0021 ± 0.0054	0.0024 ± 0.0052	0.0022 ± 0.0049	0.0024 ± 0.0057	0.0017 ± 0.0045	0.0028 ± 0.0058	0.0024 ± 0.0059	0.0020 ± 0.0045	0.0016 ± 0.0038	0.0030 ± 0.0063	0.0015 ± 0.0038	0.0029 ± 0.0063	0.0013 ± 0.0036	0.0029 ± 0.0064	0.0017 ± 0.0040	0.0031 ± 0.0062	0.0025 ± 0.0056	0.0021 ± 0.0049	0.0018 ± 0.0052	0.0027 ± 0.0054	0.0019 ± 0.0055	0.0023 ± 0.0051	0.0023 ± 0.0054	0.0026 ± 0.0052	0.0013 ± 0.0034	0.0029 ± 0.0067	0.0018 ± 0.0042
207	Firmicutes	Ruminococcaceae	uncultured	80		100	100	100	100	100		0.51 ± 1.17	0.54 ± 1.35	0.46 ± 0.72		2.32 ± 1.47	1.73 ± 1.07	2.89 ± 1.57	2.19 ± 1.48	2.45 ± 1.44	2.30 ± 1.47	2.35 ± 1.47	2.38 ± 1.57	2.26 ± 1.36	2.34 ± 1.47	2.31 ± 1.47	2.16 ± 1.56	2.22 ± 1.42	2.41 ± 1.39	2.51 ± 1.51	1.71 ± 1.07	2.66 ± 1.66	1.75 ± 1.06	3.11 ± 1.45	1.75 ± 1.07	2.81 ± 1.61	1.72 ± 1.07	2.97 ± 1.54	2.26 ± 1.62	2.12 ± 1.33	2.51 ± 1.51	2.39 ± 1.38	2.37 ± 1.62	2.23 ± 1.30	2.40 ± 1.51	2.29 ± 1.42	1.79 ± 1.13	2.94 ± 1.71	1.67 ± 1.00
208	Firmicutes	Ruminococcaceae	Ruminococcus	3.63636		77.2464	75	68.7861	82.2485	82.7778		0.036 ± 0.198	0.000 ± 0.000	0.104 ± 0.332		0.84 ± 1.10	0.59 ± 0.70	1.07 ± 1.34	0.69 ± 0.97	0.98 ± 1.19	0.83 ± 1.12	0.85 ± 1.08	0.81 ± 1.11	0.87 ± 1.09	0.92 ± 1.12	0.74 ± 1.06	0.68 ± 1.04	0.70 ± 0.91	0.94 ± 1.16	1.03 ± 1.23	0.52 ± 0.60	0.85 ± 1.21	0.66 ± 0.78	1.29 ± 1.42	0.57 ± 0.71	1.06 ± 1.35	0.61 ± 0.69	1.09 ± 1.32	0.59 ± 0.89	0.79 ± 1.05	1.01 ± 1.25	0.95 ± 1.13	0.76 ± 1.12	0.89 ± 1.11	0.86 ± 1.09	0.84 ± 1.08	0.56 ± 0.70	1.04 ± 1.34	0.62 ± 0.70
209	Firmicutes	Ruminococcaceae	Incertae_Sedis	100		100	100	100	100	100		0.85 ± 0.89	0.59 ± 0.54	1.34 ± 1.19		0.64 ± 0.30	0.45 ± 0.20	0.83 ± 0.25	0.63 ± 0.28	0.65 ± 0.31	0.65 ± 0.30	0.64 ± 0.29	0.65 ± 0.29	0.63 ± 0.30	0.64 ± 0.28	0.65 ± 0.31	0.63 ± 0.29	0.64 ± 0.28	0.66 ± 0.31	0.64 ± 0.31	0.45 ± 0.21	0.81 ± 0.23	0.45 ± 0.19	0.84 ± 0.27	0.45 ± 0.20	0.83 ± 0.26	0.45 ± 0.19	0.82 ± 0.25	0.65 ± 0.29	0.62 ± 0.28	0.66 ± 0.29	0.65 ± 0.32	0.66 ± 0.29	0.64 ± 0.30	0.65 ± 0.29	0.63 ± 0.30	0.45 ± 0.18	0.84 ± 0.25	0.45 ± 0.21
210	Firmicutes	Ruminococcaceae	[Eubacterium]_siraeum_group	0		91.0145	84.5238	91.9075	91.1243	96.1111		0 ± 0	0 ± 0	0 ± 0		0.63 ± 0.88	0.55 ± 0.99	0.71 ± 0.77	0.53 ± 0.71	0.73 ± 1.02	0.62 ± 0.77	0.65 ± 0.99	0.62 ± 0.97	0.65 ± 0.78	0.65 ± 0.95	0.62 ± 0.80	0.54 ± 0.72	0.53 ± 0.70	0.69 ± 0.80	0.79 ± 1.23	0.43 ± 0.65	0.63 ± 0.75	0.68 ± 1.22	0.79 ± 0.77	0.52 ± 0.69	0.72 ± 0.82	0.59 ± 1.21	0.71 ± 0.70	0.52 ± 0.74	0.54 ± 0.68	0.72 ± 1.14	0.75 ± 0.86	0.61 ± 0.82	0.64 ± 0.71	0.64 ± 1.10	0.66 ± 0.86	0.53 ± 1.14	0.71 ± 0.77	0.58 ± 0.80
211	Firmicutes	Ruminococcaceae	UBA1819	5.45455		99.1304	97.619	100	98.8166	100		0.026 ± 0.127	0.010 ± 0.062	0.055 ± 0.198		0.43 ± 0.38	0.29 ± 0.32	0.57 ± 0.40	0.43 ± 0.38	0.44 ± 0.39	0.43 ± 0.39	0.43 ± 0.38	0.45 ± 0.41	0.41 ± 0.36	0.45 ± 0.40	0.41 ± 0.37	0.43 ± 0.38	0.43 ± 0.38	0.44 ± 0.40	0.44 ± 0.38	0.31 ± 0.35	0.55 ± 0.37	0.28 ± 0.28	0.58 ± 0.42	0.27 ± 0.30	0.58 ± 0.41	0.31 ± 0.33	0.56 ± 0.38	0.46 ± 0.40	0.40 ± 0.35	0.45 ± 0.41	0.42 ± 0.37	0.47 ± 0.43	0.39 ± 0.35	0.44 ± 0.39	0.43 ± 0.37	0.32 ± 0.36	0.58 ± 0.41	0.27 ± 0.27
212	Firmicutes	Ruminococcaceae	Fournierella	1.81818		81.3043	77.9762	82.0809	74.5562	90		0.0023 ± 0.0169	0.0000 ± 0.0000	0.0066 ± 0.0287		0.28 ± 0.40	0.30 ± 0.43	0.27 ± 0.37	0.35 ± 0.43	0.21 ± 0.35	0.27 ± 0.39	0.29 ± 0.41	0.27 ± 0.38	0.30 ± 0.42	0.26 ± 0.37	0.30 ± 0.43	0.35 ± 0.42	0.36 ± 0.44	0.21 ± 0.35	0.22 ± 0.36	0.40 ± 0.48	0.31 ± 0.37	0.20 ± 0.34	0.23 ± 0.36	0.29 ± 0.41	0.26 ± 0.36	0.32 ± 0.45	0.27 ± 0.37	0.35 ± 0.42	0.36 ± 0.45	0.19 ± 0.33	0.24 ± 0.38	0.26 ± 0.38	0.28 ± 0.39	0.27 ± 0.38	0.32 ± 0.44	0.29 ± 0.42	0.25 ± 0.34	0.31 ± 0.44
213	Firmicutes	Ruminococcaceae	Ruminococcaceae	0		70.5797	72.0238	68.7861	68.0473	73.3333		0 ± 0	0 ± 0	0 ± 0		0.13 ± 0.23	0.08 ± 0.12	0.17 ± 0.29	0.11 ± 0.21	0.14 ± 0.24	0.12 ± 0.24	0.13 ± 0.21	0.10 ± 0.19	0.15 ± 0.26	0.12 ± 0.22	0.13 ± 0.24	0.12 ± 0.24	0.11 ± 0.17	0.13 ± 0.24	0.15 ± 0.25	0.09 ± 0.12	0.14 ± 0.26	0.08 ± 0.12	0.19 ± 0.31	0.07 ± 0.12	0.17 ± 0.31	0.09 ± 0.12	0.16 ± 0.27	0.10 ± 0.18	0.13 ± 0.23	0.11 ± 0.21	0.17 ± 0.28	0.11 ± 0.21	0.14 ± 0.27	0.10 ± 0.17	0.15 ± 0.25	0.08 ± 0.12	0.13 ± 0.24	0.09 ± 0.13
214	Firmicutes	Ruminococcaceae	__	3.63636		85.6522	72.0238	91.3295	79.2899	98.8889		0.0045 ± 0.0236	0.0000 ± 0.0000	0.0130 ± 0.0394		0.043 ± 0.054	0.020 ± 0.041	0.064 ± 0.056	0.032 ± 0.045	0.053 ± 0.059	0.040 ± 0.046	0.045 ± 0.060	0.041 ± 0.051	0.045 ± 0.056	0.047 ± 0.053	0.038 ± 0.054	0.029 ± 0.032	0.034 ± 0.053	0.049 ± 0.053	0.059 ± 0.066	0.018 ± 0.043	0.046 ± 0.042	0.023 ± 0.038	0.082 ± 0.061	0.021 ± 0.035	0.058 ± 0.048	0.020 ± 0.046	0.070 ± 0.063	0.028 ± 0.028	0.036 ± 0.057	0.054 ± 0.063	0.053 ± 0.055	0.039 ± 0.048	0.041 ± 0.044	0.043 ± 0.054	0.048 ± 0.067	0.017 ± 0.030	0.064 ± 0.056	0.024 ± 0.049
215	Firmicutes	Ruminococcaceae	Paludicola	85.4545		44.6377	37.5	49.711	48.5207	42.7778		0.070 ± 0.055	0.069 ± 0.049	0.071 ± 0.067		0.0061 ± 0.0090	0.0056 ± 0.0086	0.0066 ± 0.0094	0.0062 ± 0.0092	0.0060 ± 0.0088	0.0062 ± 0.0094	0.0060 ± 0.0086	0.0056 ± 0.0083	0.0066 ± 0.0097	0.0057 ± 0.0090	0.0065 ± 0.0090	0.0058 ± 0.0088	0.0065 ± 0.0095	0.0065 ± 0.0099	0.0054 ± 0.0073	0.0048 ± 0.0080	0.0075 ± 0.0101	0.0064 ± 0.0091	0.0057 ± 0.0086	0.0060 ± 0.0093	0.0064 ± 0.0096	0.0052 ± 0.0078	0.0068 ± 0.0092	0.0059 ± 0.0086	0.0065 ± 0.0098	0.0054 ± 0.0080	0.0066 ± 0.0096	0.0057 ± 0.0086	0.0066 ± 0.0102	0.0056 ± 0.0080	0.0065 ± 0.0091	0.0052 ± 0.0080	0.0061 ± 0.0086	0.0060 ± 0.0091
216	Firmicutes	Ruminococcaceae	Anaerofilum	0		29.2754	16.0714	49.711	13.0178	37.2222		0 ± 0	0 ± 0	0 ± 0		0.0047 ± 0.0095	0.0013 ± 0.0035	0.0080 ± 0.0119	0.0055 ± 0.0101	0.0039 ± 0.0088	0.0050 ± 0.0099	0.0044 ± 0.0090	0.0047 ± 0.0096	0.0048 ± 0.0094	0.0054 ± 0.0105	0.0039 ± 0.0082	0.0057 ± 0.0102	0.0053 ± 0.0101	0.0045 ± 0.0097	0.0032 ± 0.0075	0.0014 ± 0.0036	0.0095 ± 0.0125	0.0011 ± 0.0035	0.0066 ± 0.0112	0.0012 ± 0.0032	0.0085 ± 0.0125	0.0013 ± 0.0039	0.0074 ± 0.0114	0.0049 ± 0.0097	0.0061 ± 0.0105	0.0044 ± 0.0095	0.0034 ± 0.0080	0.0053 ± 0.0101	0.0048 ± 0.0097	0.0040 ± 0.0090	0.0048 ± 0.0091	0.0011 ± 0.0030	0.0080 ± 0.0121	0.0015 ± 0.0040
217	Firmicutes	Ruminococcaceae	Anaerotruncus	16.3636		34.3478	21.4286	54.3353	15.3846	45		0.015 ± 0.050	0.013 ± 0.044	0.020 ± 0.060		0.0044 ± 0.0076	0.0018 ± 0.0044	0.0068 ± 0.0091	0.0050 ± 0.0079	0.0038 ± 0.0073	0.0048 ± 0.0086	0.0039 ± 0.0064	0.0041 ± 0.0074	0.0046 ± 0.0078	0.0047 ± 0.0075	0.0039 ± 0.0077	0.0058 ± 0.0087	0.0042 ± 0.0071	0.0040 ± 0.0085	0.0035 ± 0.0055	0.0022 ± 0.0049	0.0076 ± 0.0092	0.0014 ± 0.0038	0.0060 ± 0.0090	0.0018 ± 0.0047	0.0076 ± 0.0103	0.0018 ± 0.0040	0.0059 ± 0.0075	0.0048 ± 0.0071	0.0051 ± 0.0087	0.0035 ± 0.0077	0.0040 ± 0.0069	0.0045 ± 0.0084	0.0052 ± 0.0088	0.0038 ± 0.0062	0.0040 ± 0.0066	0.0017 ± 0.0041	0.0064 ± 0.0089	0.0020 ± 0.0046
219	Firmicutes	Butyricicoccaceae	Butyricicoccus	1.81818		94.2029	95.8333	95.3757	94.0828	91.6667		0.0069 ± 0.0510	0.0105 ± 0.0630	0.0000 ± 0.0000		0.13 ± 0.13	0.12 ± 0.11	0.13 ± 0.14	0.13 ± 0.12	0.12 ± 0.13	0.13 ± 0.12	0.12 ± 0.13	0.11 ± 0.10	0.14 ± 0.14	0.12 ± 0.12	0.13 ± 0.13	0.14 ± 0.12	0.12 ± 0.12	0.12 ± 0.13	0.12 ± 0.13	0.13 ± 0.11	0.13 ± 0.13	0.10 ± 0.10	0.13 ± 0.15	0.12 ± 0.11	0.14 ± 0.13	0.11 ± 0.10	0.13 ± 0.15	0.12 ± 0.11	0.14 ± 0.13	0.10 ± 0.10	0.14 ± 0.15	0.12 ± 0.12	0.14 ± 0.13	0.10 ± 0.09	0.14 ± 0.15	0.11 ± 0.09	0.11 ± 0.11	0.13 ± 0.12
220	Firmicutes	Butyricicoccaceae	UCG-009	1.81818		95.7971	92.8571	97.1098	94.6746	98.3333		0.0006 ± 0.0045	0.0000 ± 0.0000	0.0018 ± 0.0077		0.12 ± 0.09	0.07 ± 0.05	0.17 ± 0.09	0.12 ± 0.09	0.12 ± 0.09	0.12 ± 0.08	0.12 ± 0.09	0.12 ± 0.09	0.13 ± 0.09	0.13 ± 0.09	0.11 ± 0.08	0.13 ± 0.08	0.12 ± 0.09	0.12 ± 0.09	0.13 ± 0.09	0.08 ± 0.06	0.17 ± 0.09	0.07 ± 0.05	0.17 ± 0.08	0.07 ± 0.06	0.17 ± 0.08	0.08 ± 0.05	0.17 ± 0.09	0.12 ± 0.09	0.13 ± 0.08	0.12 ± 0.08	0.13 ± 0.09	0.11 ± 0.08	0.13 ± 0.09	0.12 ± 0.09	0.13 ± 0.08	0.07 ± 0.05	0.16 ± 0.09	0.08 ± 0.06
221	Firmicutes	[Eubacterium]_coprostanoligenes_group	[Eubacterium]_coprostanoligenes_group	23.6364		68.8406	66.0714	78.6127	52.6627	77.2222		0.043 ± 0.114	0.032 ± 0.089	0.062 ± 0.152		0.066 ± 0.081	0.034 ± 0.048	0.096 ± 0.093	0.074 ± 0.084	0.058 ± 0.077	0.062 ± 0.077	0.070 ± 0.084	0.063 ± 0.082	0.069 ± 0.080	0.066 ± 0.075	0.066 ± 0.087	0.069 ± 0.077	0.079 ± 0.089	0.057 ± 0.077	0.060 ± 0.077	0.043 ± 0.054	0.105 ± 0.096	0.026 ± 0.039	0.089 ± 0.090	0.030 ± 0.041	0.091 ± 0.090	0.038 ± 0.054	0.102 ± 0.096	0.072 ± 0.082	0.077 ± 0.086	0.055 ± 0.081	0.062 ± 0.073	0.060 ± 0.082	0.064 ± 0.071	0.066 ± 0.081	0.074 ± 0.088	0.030 ± 0.044	0.094 ± 0.096	0.038 ± 0.052
222	Firmicutes	UCG-010	UCG-010	5.45455		65.942	58.9286	68.2081	68.0473	68.3333		0.0010 ± 0.0043	0.0008 ± 0.0036	0.0013 ± 0.0055		0.033 ± 0.036	0.031 ± 0.034	0.034 ± 0.037	0.032 ± 0.034	0.034 ± 0.037	0.033 ± 0.037	0.032 ± 0.035	0.032 ± 0.037	0.033 ± 0.035	0.037 ± 0.038	0.028 ± 0.033	0.030 ± 0.033	0.033 ± 0.035	0.035 ± 0.039	0.032 ± 0.035	0.029 ± 0.031	0.034 ± 0.037	0.034 ± 0.037	0.033 ± 0.037	0.033 ± 0.037	0.032 ± 0.036	0.029 ± 0.032	0.036 ± 0.038	0.030 ± 0.036	0.033 ± 0.032	0.034 ± 0.038	0.033 ± 0.037	0.031 ± 0.038	0.034 ± 0.035	0.033 ± 0.036	0.032 ± 0.034	0.028 ± 0.032	0.036 ± 0.040	0.034 ± 0.036
224	Firmicutes	__	__	74.5455		19.4203	5.35714	21.9653	14.7929	34.4444		0.031 ± 0.033	0.024 ± 0.025	0.047 ± 0.042		0.0021 ± 0.0051	0.0008 ± 0.0025	0.0033 ± 0.0065	0.0013 ± 0.0039	0.0028 ± 0.0061	0.0019 ± 0.0047	0.0022 ± 0.0056	0.0022 ± 0.0052	0.0019 ± 0.0051	0.0024 ± 0.0055	0.0016 ± 0.0047	0.0013 ± 0.0039	0.0013 ± 0.0038	0.0023 ± 0.0051	0.0034 ± 0.0070	0.0003 ± 0.0016	0.0022 ± 0.0050	0.0012 ± 0.0032	0.0043 ± 0.0076	0.0007 ± 0.0024	0.0030 ± 0.0058	0.0008 ± 0.0027	0.0036 ± 0.0072	0.0014 ± 0.0040	0.0012 ± 0.0037	0.0029 ± 0.0061	0.0026 ± 0.0061	0.0016 ± 0.0045	0.0022 ± 0.0049	0.0028 ± 0.0058	0.0017 ± 0.0053	0.0008 ± 0.0026	0.0035 ± 0.0065	0.0007 ± 0.0024
226	Firmicutes	Christensenellaceae	uncultured	27.2727		83.4783	83.9286	80.9249	87.574	81.6667		0.0039 ± 0.0084	0.0032 ± 0.0064	0.0052 ± 0.0113		2.28 ± 3.95	4.12 ± 4.90	0.53 ± 1.09	2.59 ± 4.37	1.99 ± 3.46	2.10 ± 3.45	2.48 ± 4.39	2.24 ± 4.00	2.33 ± 3.89	2.23 ± 4.14	2.35 ± 3.72	2.33 ± 3.74	2.80 ± 4.83	1.91 ± 3.21	2.08 ± 3.77	4.68 ± 5.34	0.55 ± 1.26	3.57 ± 4.37	0.50 ± 0.89	3.75 ± 4.24	0.57 ± 1.23	4.50 ± 5.47	0.49 ± 0.92	2.56 ± 4.49	2.61 ± 4.26	1.93 ± 3.45	2.05 ± 3.49	1.83 ± 3.28	2.37 ± 3.62	2.65 ± 4.59	2.29 ± 4.17	4.16 ± 5.02	0.45 ± 0.88	4.09 ± 4.79
227	Firmicutes	Christensenellaceae	__	5.45455		85.2174	81.5476	85.5491	85.2071	88.3333		0.0019 ± 0.0123	0.0004 ± 0.0017	0.0048 ± 0.0209		2.25 ± 3.52	3.11 ± 4.19	1.42 ± 2.47	2.02 ± 3.10	2.47 ± 3.87	2.40 ± 3.54	2.09 ± 3.50	1.97 ± 3.00	2.54 ± 3.98	1.91 ± 3.05	2.62 ± 3.95	2.29 ± 3.41	1.80 ± 2.82	2.49 ± 3.65	2.44 ± 4.15	2.82 ± 3.70	1.25 ± 2.13	3.41 ± 4.61	1.58 ± 2.75	3.32 ± 4.15	1.55 ± 2.60	2.91 ± 4.23	1.28 ± 2.33	1.87 ± 2.82	2.18 ± 3.37	2.06 ± 3.16	2.90 ± 4.49	2.15 ± 3.00	2.66 ± 4.02	1.78 ± 2.99	2.42 ± 3.95	2.72 ± 3.58	1.27 ± 2.10	3.52 ± 4.71
228	Firmicutes	Christensenellaceae	Christensenella	1.81818		35.942	28.5714	34.6821	33.7278	46.1111		0.0003 ± 0.0025	0.0000 ± 0.0000	0.0010 ± 0.0042		0.0044 ± 0.0074	0.0038 ± 0.0073	0.0050 ± 0.0074	0.0034 ± 0.0058	0.0054 ± 0.0086	0.0051 ± 0.0083	0.0037 ± 0.0063	0.0042 ± 0.0073	0.0046 ± 0.0075	0.0047 ± 0.0079	0.0040 ± 0.0067	0.0036 ± 0.0060	0.0032 ± 0.0056	0.0063 ± 0.0095	0.0043 ± 0.0070	0.0031 ± 0.0059	0.0037 ± 0.0057	0.0045 ± 0.0084	0.0063 ± 0.0086	0.0047 ± 0.0086	0.0054 ± 0.0079	0.0029 ± 0.0056	0.0045 ± 0.0068	0.0036 ± 0.0063	0.0032 ± 0.0051	0.0048 ± 0.0081	0.0060 ± 0.0090	0.0047 ± 0.0082	0.0055 ± 0.0084	0.0038 ± 0.0063	0.0036 ± 0.0063	0.0041 ± 0.0081	0.0044 ± 0.0065	0.0035 ± 0.0064
230	Firmicutes	Clostridia_vadinBB60_group	Clostridia_vadinBB60_group	34.5455		100	100	100	100	100		0.26 ± 0.79	0.06 ± 0.17	0.66 ± 1.26		2.48 ± 1.39	2.08 ± 1.49	2.86 ± 1.17	2.47 ± 1.34	2.49 ± 1.44	2.48 ± 1.41	2.48 ± 1.38	2.53 ± 1.51	2.42 ± 1.25	2.50 ± 1.39	2.46 ± 1.39	2.43 ± 1.35	2.50 ± 1.34	2.51 ± 1.46	2.46 ± 1.42	2.01 ± 1.36	2.92 ± 1.17	2.15 ± 1.61	2.81 ± 1.17	2.13 ± 1.62	2.80 ± 1.09	2.03 ± 1.35	2.93 ± 1.25	2.49 ± 1.50	2.45 ± 1.17	2.57 ± 1.53	2.40 ± 1.34	2.50 ± 1.52	2.44 ± 1.29	2.56 ± 1.50	2.40 ± 1.23	2.08 ± 1.66	2.96 ± 1.21	2.08 ± 1.29
231	Firmicutes	Peptococcaceae	uncultured	1.81818		93.6232	92.2619	87.8613	98.8166	95.5556		0.0040 ± 0.0296	0.0000 ± 0.0000	0.0116 ± 0.0504		0.47 ± 0.51	0.79 ± 0.57	0.16 ± 0.09	0.49 ± 0.55	0.44 ± 0.47	0.44 ± 0.50	0.49 ± 0.53	0.48 ± 0.54	0.45 ± 0.49	0.46 ± 0.53	0.47 ± 0.50	0.45 ± 0.54	0.52 ± 0.56	0.43 ± 0.46	0.47 ± 0.49	0.84 ± 0.61	0.15 ± 0.10	0.74 ± 0.54	0.16 ± 0.07	0.74 ± 0.57	0.16 ± 0.08	0.84 ± 0.57	0.16 ± 0.09	0.49 ± 0.55	0.48 ± 0.55	0.47 ± 0.53	0.41 ± 0.41	0.44 ± 0.50	0.43 ± 0.49	0.52 ± 0.57	0.47 ± 0.49	0.83 ± 0.60	0.16 ± 0.08	0.75 ± 0.54
232	Firmicutes	Peptococcaceae	Peptococcus	1.81818		95.0725	98.2143	97.1098	96.4497	88.8889		0.0033 ± 0.0244	0.0050 ± 0.0301	0.0000 ± 0.0000		0.11 ± 0.07	0.10 ± 0.06	0.11 ± 0.08	0.11 ± 0.07	0.10 ± 0.08	0.10 ± 0.07	0.11 ± 0.08	0.11 ± 0.08	0.10 ± 0.06	0.12 ± 0.08	0.09 ± 0.07	0.11 ± 0.07	0.11 ± 0.07	0.10 ± 0.07	0.11 ± 0.08	0.11 ± 0.06	0.11 ± 0.07	0.10 ± 0.06	0.11 ± 0.09	0.11 ± 0.06	0.10 ± 0.07	0.10 ± 0.06	0.12 ± 0.09	0.12 ± 0.08	0.10 ± 0.06	0.10 ± 0.08	0.10 ± 0.07	0.11 ± 0.07	0.10 ± 0.06	0.12 ± 0.09	0.10 ± 0.06	0.11 ± 0.06	0.12 ± 0.09	0.10 ± 0.06
233	Firmicutes	Anaerovoracaceae	Family_XIII_UCG-001	0		86.5217	79.1667	89.5954	82.2485	94.4444		0 ± 0	0 ± 0	0 ± 0		0.076 ± 0.068	0.026 ± 0.021	0.123 ± 0.063	0.077 ± 0.072	0.074 ± 0.064	0.072 ± 0.066	0.080 ± 0.070	0.077 ± 0.071	0.075 ± 0.064	0.072 ± 0.062	0.080 ± 0.074	0.075 ± 0.072	0.079 ± 0.072	0.069 ± 0.061	0.080 ± 0.067	0.026 ± 0.021	0.127 ± 0.068	0.026 ± 0.020	0.119 ± 0.057	0.023 ± 0.019	0.117 ± 0.062	0.029 ± 0.021	0.130 ± 0.064	0.080 ± 0.077	0.075 ± 0.066	0.074 ± 0.065	0.074 ± 0.063	0.072 ± 0.070	0.072 ± 0.062	0.082 ± 0.073	0.078 ± 0.066	0.025 ± 0.021	0.125 ± 0.068	0.026 ± 0.020
234	Firmicutes	Anaerovoracaceae	[Eubacterium]_brachy_group	7.27273		95.6522	90.4762	97.1098	96.4497	98.3333		0.011 ± 0.043	0.005 ± 0.022	0.022 ± 0.066		0.067 ± 0.052	0.036 ± 0.023	0.097 ± 0.055	0.067 ± 0.055	0.067 ± 0.049	0.068 ± 0.051	0.066 ± 0.054	0.073 ± 0.058	0.061 ± 0.045	0.061 ± 0.045	0.074 ± 0.059	0.069 ± 0.053	0.065 ± 0.057	0.068 ± 0.049	0.067 ± 0.050	0.032 ± 0.021	0.100 ± 0.058	0.039 ± 0.023	0.094 ± 0.053	0.037 ± 0.022	0.097 ± 0.054	0.034 ± 0.023	0.097 ± 0.057	0.073 ± 0.061	0.061 ± 0.048	0.072 ± 0.055	0.062 ± 0.041	0.076 ± 0.056	0.060 ± 0.044	0.070 ± 0.060	0.062 ± 0.046	0.037 ± 0.022	0.106 ± 0.062	0.035 ± 0.023
235	Firmicutes	Anaerovoracaceae	Family_XIII_AD3011_group	1.81818		77.8261	63.0952	90.7514	65.6805	90.5556		0.0003 ± 0.0023	0.0000 ± 0.0000	0.0009 ± 0.0040		0.040 ± 0.042	0.015 ± 0.017	0.063 ± 0.045	0.034 ± 0.035	0.045 ± 0.046	0.039 ± 0.040	0.040 ± 0.044	0.040 ± 0.044	0.039 ± 0.039	0.040 ± 0.042	0.040 ± 0.042	0.034 ± 0.035	0.033 ± 0.035	0.043 ± 0.042	0.049 ± 0.051	0.014 ± 0.016	0.053 ± 0.038	0.016 ± 0.017	0.073 ± 0.049	0.018 ± 0.018	0.059 ± 0.044	0.013 ± 0.015	0.067 ± 0.046	0.032 ± 0.035	0.035 ± 0.036	0.048 ± 0.050	0.042 ± 0.042	0.040 ± 0.042	0.038 ± 0.037	0.041 ± 0.046	0.039 ± 0.041	0.013 ± 0.014	0.066 ± 0.047	0.017 ± 0.019
236	Firmicutes	Anaerovoracaceae	__	0		23.6232	6.54762	29.4798	10.6509	46.1111		0 ± 0	0 ± 0	0 ± 0		0.0050 ± 0.0118	0.0009 ± 0.0037	0.0089 ± 0.0152	0.0038 ± 0.0108	0.0063 ± 0.0127	0.0043 ± 0.0100	0.0057 ± 0.0134	0.0056 ± 0.0124	0.0044 ± 0.0112	0.0060 ± 0.0129	0.0039 ± 0.0104	0.0029 ± 0.0078	0.0045 ± 0.0128	0.0055 ± 0.0114	0.0072 ± 0.0140	0.0007 ± 0.0029	0.0068 ± 0.0143	0.0012 ± 0.0044	0.0110 ± 0.0157	0.0011 ± 0.0046	0.0073 ± 0.0125	0.0007 ± 0.0025	0.0106 ± 0.0174	0.0039 ± 0.0112	0.0037 ± 0.0105	0.0072 ± 0.0133	0.0052 ± 0.0118	0.0045 ± 0.0097	0.0042 ± 0.0104	0.0067 ± 0.0146	0.0047 ± 0.0120	0.0011 ± 0.0041	0.0098 ± 0.0157	0.0007 ± 0.0032
237	Firmicutes	Anaerovoracaceae	Anaerovorax	1.81818		22.6087	20.8333	20.8092	29.5858	19.4444		0.0019 ± 0.0144	0.0030 ± 0.0178	0.0000 ± 0.0000		0.0022 ± 0.0048	0.0023 ± 0.0045	0.0022 ± 0.0051	0.0022 ± 0.0051	0.0023 ± 0.0045	0.0022 ± 0.0048	0.0023 ± 0.0048	0.0021 ± 0.0046	0.0024 ± 0.0051	0.0025 ± 0.0051	0.0020 ± 0.0045	0.0023 ± 0.0052	0.0022 ± 0.0051	0.0022 ± 0.0045	0.0023 ± 0.0045	0.0019 ± 0.0044	0.0025 ± 0.0057	0.0026 ± 0.0047	0.0019 ± 0.0044	0.0023 ± 0.0044	0.0022 ± 0.0052	0.0023 ± 0.0047	0.0023 ± 0.0050	0.0021 ± 0.0049	0.0024 ± 0.0053	0.0021 ± 0.0043	0.0025 ± 0.0048	0.0018 ± 0.0041	0.0027 ± 0.0054	0.0023 ± 0.0050	0.0022 ± 0.0047	0.0024 ± 0.0045	0.0018 ± 0.0047	0.0022 ± 0.0046
240	Firmicutes	Monoglobaceae	Monoglobus	0		32.8986	14.2857	38.7283	23.6686	53.3333		0 ± 0	0 ± 0	0 ± 0		0.19 ± 0.43	0.04 ± 0.14	0.33 ± 0.54	0.14 ± 0.36	0.23 ± 0.48	0.19 ± 0.43	0.19 ± 0.43	0.17 ± 0.41	0.20 ± 0.44	0.17 ± 0.40	0.20 ± 0.45	0.13 ± 0.34	0.14 ± 0.38	0.23 ± 0.48	0.24 ± 0.48	0.03 ± 0.13	0.24 ± 0.47	0.04 ± 0.16	0.41 ± 0.60	0.04 ± 0.15	0.32 ± 0.54	0.03 ± 0.14	0.34 ± 0.54	0.14 ± 0.37	0.13 ± 0.36	0.20 ± 0.46	0.27 ± 0.50	0.17 ± 0.41	0.21 ± 0.45	0.18 ± 0.42	0.19 ± 0.43	0.04 ± 0.13	0.30 ± 0.53	0.04 ± 0.16
241	Firmicutes	__	__	3.63636		87.2464	79.7619	94.7977	79.8817	93.8889		0.0037 ± 0.0194	0.0024 ± 0.0145	0.0061 ± 0.0266		0.054 ± 0.064	0.046 ± 0.074	0.061 ± 0.051	0.051 ± 0.059	0.057 ± 0.068	0.054 ± 0.063	0.053 ± 0.065	0.057 ± 0.069	0.050 ± 0.057	0.059 ± 0.072	0.048 ± 0.052	0.049 ± 0.049	0.052 ± 0.066	0.058 ± 0.072	0.055 ± 0.063	0.040 ± 0.064	0.061 ± 0.051	0.053 ± 0.082	0.060 ± 0.051	0.048 ± 0.075	0.060 ± 0.048	0.045 ± 0.073	0.062 ± 0.054	0.058 ± 0.073	0.043 ± 0.039	0.057 ± 0.065	0.057 ± 0.070	0.056 ± 0.065	0.052 ± 0.060	0.059 ± 0.073	0.047 ± 0.055	0.050 ± 0.081	0.064 ± 0.054	0.042 ± 0.065
242	Firmicutes	Clostridia_UCG-014	Clostridia_UCG-014	1.81818		81.8841	78.5714	83.237	82.2485	83.3333		0.0001 ± 0.0007	0.0001 ± 0.0009	0.0000 ± 0.0000		0.049 ± 0.069	0.045 ± 0.047	0.053 ± 0.085	0.054 ± 0.085	0.044 ± 0.048	0.044 ± 0.049	0.054 ± 0.085	0.048 ± 0.082	0.050 ± 0.053	0.047 ± 0.048	0.052 ± 0.087	0.046 ± 0.052	0.061 ± 0.105	0.042 ± 0.047	0.045 ± 0.049	0.047 ± 0.049	0.061 ± 0.109	0.043 ± 0.046	0.044 ± 0.050	0.041 ± 0.043	0.047 ± 0.055	0.049 ± 0.051	0.058 ± 0.108	0.054 ± 0.107	0.055 ± 0.055	0.043 ± 0.046	0.045 ± 0.051	0.041 ± 0.048	0.047 ± 0.050	0.055 ± 0.105	0.053 ± 0.056	0.041 ± 0.046	0.055 ± 0.104	0.050 ± 0.048
243	Firmicutes	Clostridiaceae	Candidatus_Arthromitus	3.63636		14.7826	0.595238	23.1214	4.73373	29.4444		0.015 ± 0.105	0.000 ± 0.000	0.044 ± 0.178		0.053 ± 0.233	0.002 ± 0.020	0.102 ± 0.317	0.047 ± 0.263	0.060 ± 0.199	0.057 ± 0.199	0.049 ± 0.263	0.045 ± 0.190	0.062 ± 0.270	0.072 ± 0.289	0.032 ± 0.143	0.049 ± 0.192	0.045 ± 0.311	0.064 ± 0.204	0.054 ± 0.192	0.001 ± 0.007	0.092 ± 0.364	0.004 ± 0.028	0.112 ± 0.265	0.004 ± 0.028	0.107 ± 0.265	0.000 ± 0.003	0.098 ± 0.365	0.038 ± 0.181	0.056 ± 0.327	0.052 ± 0.199	0.068 ± 0.198	0.044 ± 0.191	0.072 ± 0.206	0.046 ± 0.191	0.053 ± 0.324	0.000 ± 0.003	0.087 ± 0.258	0.004 ± 0.028
245	Firmicutes	Anaerofustaceae	Anaerofustis	27.2727		11.7391	4.7619	17.341	10.0592	14.4444		0.0067 ± 0.0141	0.0078 ± 0.0157	0.0047 ± 0.0107		0.0011 ± 0.0034	0.0006 ± 0.0025	0.0016 ± 0.0041	0.0010 ± 0.0033	0.0012 ± 0.0036	0.0009 ± 0.0031	0.0013 ± 0.0037	0.0013 ± 0.0037	0.0009 ± 0.0030	0.0008 ± 0.0029	0.0014 ± 0.0038	0.0008 ± 0.0029	0.0013 ± 0.0035	0.0011 ± 0.0032	0.0013 ± 0.0039	0.0004 ± 0.0021	0.0016 ± 0.0040	0.0008 ± 0.0028	0.0015 ± 0.0041	0.0004 ± 0.0020	0.0014 ± 0.0038	0.0008 ± 0.0029	0.0017 ± 0.0043	0.0011 ± 0.0035	0.0010 ± 0.0029	0.0015 ± 0.0039	0.0008 ± 0.0031	0.0013 ± 0.0037	0.0006 ± 0.0022	0.0012 ± 0.0038	0.0013 ± 0.0037	0.0007 ± 0.0027	0.0018 ± 0.0044	0.0005 ± 0.0022
247	Firmicutes	Lactobacillaceae	Lactobacillus	98.1818		95.2174	100	84.3931	100	96.6667		6.19 ± 5.03	8.71 ± 4.36	1.40 ± 1.45		5.03 ± 4.72	8.51 ± 4.28	1.70 ± 1.85	4.19 ± 4.21	5.84 ± 5.04	5.29 ± 4.74	4.76 ± 4.69	5.60 ± 5.21	4.42 ± 4.06	4.95 ± 4.69	5.11 ± 4.75	4.26 ± 4.02	4.13 ± 4.38	6.11 ± 5.11	5.51 ± 4.95	7.23 ± 3.96	1.24 ± 1.43	9.78 ± 4.22	2.15 ± 2.08	8.99 ± 4.08	1.85 ± 1.83	8.03 ± 4.44	1.54 ± 1.86	4.54 ± 4.69	3.83 ± 3.64	6.61 ± 5.48	5.02 ± 4.38	5.82 ± 5.23	4.74 ± 4.11	5.38 ± 5.19	4.10 ± 4.01	9.64 ± 4.56	1.83 ± 1.88	7.34 ± 3.64
248	Firmicutes	Streptococcaceae	Streptococcus	45.4545		55.7971	41.6667	63.0058	44.3787	72.7778		0.0098 ± 0.0212	0.0034 ± 0.0058	0.0218 ± 0.0323		0.012 ± 0.022	0.006 ± 0.009	0.018 ± 0.028	0.012 ± 0.025	0.012 ± 0.019	0.011 ± 0.016	0.013 ± 0.027	0.011 ± 0.016	0.014 ± 0.027	0.013 ± 0.027	0.011 ± 0.016	0.010 ± 0.016	0.014 ± 0.030	0.012 ± 0.016	0.012 ± 0.023	0.006 ± 0.010	0.018 ± 0.032	0.006 ± 0.009	0.018 ± 0.024	0.005 ± 0.007	0.017 ± 0.019	0.007 ± 0.011	0.019 ± 0.035	0.010 ± 0.017	0.014 ± 0.031	0.011 ± 0.016	0.013 ± 0.022	0.010 ± 0.015	0.012 ± 0.017	0.011 ± 0.017	0.016 ± 0.034	0.006 ± 0.009	0.015 ± 0.020	0.006 ± 0.009
254	Firmicutes	Erysipelotrichaceae	Ileibacterium	1.81818		18.1159	20.2381	1.7341	43.1953	8.33333		0.0000 ± 0.0002	0.0001 ± 0.0003	0.0000 ± 0.0000		0.63 ± 2.50	1.28 ± 3.45	0.01 ± 0.15	0.27 ± 1.51	0.98 ± 3.14	0.69 ± 2.68	0.57 ± 2.29	0.71 ± 2.72	0.55 ± 2.24	0.56 ± 2.35	0.71 ± 2.65	0.32 ± 1.67	0.24 ± 1.36	0.99 ± 3.25	0.97 ± 3.01	0.56 ± 2.11	0.00 ± 0.01	2.00 ± 4.28	0.02 ± 0.21	1.42 ± 3.73	0.02 ± 0.21	1.15 ± 3.16	0.00 ± 0.03	0.26 ± 1.47	0.29 ± 1.55	1.14 ± 3.47	0.81 ± 2.74	0.69 ± 2.67	0.70 ± 2.70	0.73 ± 2.77	0.39 ± 1.62	1.45 ± 3.77	0.02 ± 0.21	1.11 ± 3.09
255	Firmicutes	Erysipelotrichaceae	__	5.45455		10.2899	22.619	9.82659	6.50888	2.77778		0.0026 ± 0.0151	0.0009 ± 0.0040	0.0058 ± 0.0252		0.58 ± 3.15	1.18 ± 4.43	0.01 ± 0.10	1.13 ± 4.37	0.04 ± 0.60	0.37 ± 2.36	0.80 ± 3.78	0.53 ± 2.85	0.63 ± 3.43	0.65 ± 3.39	0.50 ± 2.85	0.76 ± 3.41	1.43 ± 5.02	0.05 ± 0.71	0.03 ± 0.42	2.27 ± 6.02	0.02 ± 0.15	0.09 ± 0.86	0.00 ± 0.00	0.75 ± 3.36	0.01 ± 0.14	1.60 ± 5.25	0.00 ± 0.03	0.99 ± 3.95	1.26 ± 4.78	0.08 ± 0.83	0.00 ± 0.00	0.30 ± 2.02	0.43 ± 2.67	0.76 ± 3.49	0.84 ± 4.07	1.09 ± 4.04	0.00 ± 0.00	1.26 ± 4.81
256	Firmicutes	Erysipelotrichaceae	uncultured	0		27.3913	32.1429	28.9017	24.8521	23.8889		0 ± 0	0 ± 0	0 ± 0		0.17 ± 0.89	0.33 ± 1.26	0.01 ± 0.03	0.32 ± 1.24	0.02 ± 0.16	0.11 ± 0.67	0.23 ± 1.07	0.15 ± 0.79	0.19 ± 0.99	0.19 ± 0.98	0.14 ± 0.78	0.22 ± 0.97	0.41 ± 1.43	0.02 ± 0.18	0.01 ± 0.12	0.64 ± 1.71	0.01 ± 0.04	0.03 ± 0.22	0.01 ± 0.02	0.21 ± 0.95	0.01 ± 0.03	0.45 ± 1.49	0.01 ± 0.02	0.28 ± 1.10	0.37 ± 1.38	0.03 ± 0.22	0.01 ± 0.02	0.08 ± 0.54	0.13 ± 0.77	0.21 ± 0.98	0.25 ± 1.17	0.30 ± 1.12	0.01 ± 0.02	0.37 ± 1.39
263	Firmicutes	Acholeplasmataceae	Anaeroplasma	0		49.5652	22.0238	53.1792	43.787	77.2222		0 ± 0	0 ± 0	0 ± 0		0.48 ± 0.88	0.08 ± 0.29	0.85 ± 1.07	0.33 ± 0.71	0.63 ± 0.99	0.46 ± 0.86	0.49 ± 0.90	0.45 ± 0.88	0.51 ± 0.88	0.51 ± 0.94	0.45 ± 0.81	0.35 ± 0.76	0.31 ± 0.67	0.56 ± 0.92	0.72 ± 1.07	0.03 ± 0.13	0.61 ± 0.91	0.13 ± 0.39	1.09 ± 1.15	0.07 ± 0.21	0.82 ± 1.06	0.09 ± 0.36	0.89 ± 1.07	0.30 ± 0.73	0.36 ± 0.69	0.59 ± 0.97	0.66 ± 1.02	0.40 ± 0.80	0.53 ± 0.92	0.50 ± 0.95	0.49 ± 0.84	0.08 ± 0.27	0.80 ± 1.08	0.09 ± 0.32
264	Firmicutes	RF39	RF39	0		85.5072	78.5714	94.7977	73.3728	94.4444		0 ± 0	0 ± 0	0 ± 0		0.074 ± 0.104	0.036 ± 0.047	0.111 ± 0.127	0.074 ± 0.111	0.075 ± 0.096	0.076 ± 0.118	0.073 ± 0.087	0.075 ± 0.112	0.074 ± 0.094	0.077 ± 0.093	0.072 ± 0.114	0.074 ± 0.130	0.073 ± 0.093	0.077 ± 0.107	0.071 ± 0.080	0.035 ± 0.049	0.112 ± 0.138	0.036 ± 0.046	0.111 ± 0.115	0.035 ± 0.043	0.114 ± 0.148	0.037 ± 0.051	0.108 ± 0.099	0.070 ± 0.124	0.078 ± 0.096	0.079 ± 0.100	0.070 ± 0.091	0.075 ± 0.136	0.077 ± 0.095	0.074 ± 0.081	0.071 ± 0.093	0.033 ± 0.037	0.114 ± 0.141	0.039 ± 0.056
265	Firmicutes	Mycoplasmataceae	Ureaplasma	23.6364		13.0435	10.119	14.4509	14.7929	12.7778		0.032 ± 0.082	0.015 ± 0.041	0.065 ± 0.122		0.011 ± 0.045	0.008 ± 0.043	0.014 ± 0.047	0.011 ± 0.038	0.010 ± 0.051	0.011 ± 0.051	0.011 ± 0.038	0.008 ± 0.033	0.014 ± 0.055	0.012 ± 0.055	0.009 ± 0.030	0.011 ± 0.037	0.012 ± 0.039	0.011 ± 0.060	0.009 ± 0.037	0.004 ± 0.015	0.018 ± 0.051	0.011 ± 0.058	0.010 ± 0.042	0.009 ± 0.058	0.012 ± 0.044	0.006 ± 0.018	0.015 ± 0.050	0.008 ± 0.033	0.014 ± 0.043	0.008 ± 0.032	0.013 ± 0.065	0.008 ± 0.036	0.014 ± 0.063	0.008 ± 0.029	0.013 ± 0.046	0.005 ± 0.019	0.011 ± 0.042	0.010 ± 0.058
274	Firmicutes	Selenomonadaceae	Veillonellaceae_UCG-001	52.7273		18.2609	30.3571	30.0578	5.32544	7.77778		0.68 ± 0.83	0.68 ± 0.82	0.66 ± 0.86		0.12 ± 0.35	0.13 ± 0.41	0.11 ± 0.29	0.21 ± 0.44	0.04 ± 0.21	0.14 ± 0.38	0.10 ± 0.32	0.11 ± 0.33	0.14 ± 0.37	0.14 ± 0.38	0.11 ± 0.32	0.25 ± 0.48	0.18 ± 0.40	0.06 ± 0.25	0.01 ± 0.14	0.22 ± 0.50	0.20 ± 0.37	0.05 ± 0.26	0.03 ± 0.14	0.18 ± 0.48	0.11 ± 0.27	0.09 ± 0.32	0.11 ± 0.31	0.18 ± 0.41	0.25 ± 0.47	0.04 ± 0.22	0.04 ± 0.19	0.12 ± 0.34	0.17 ± 0.42	0.09 ± 0.32	0.11 ± 0.32	0.11 ± 0.38	0.10 ± 0.28	0.15 ± 0.44
276	Firmicutes	Syntrophomonadaceae	Syntrophomonas	0		30.8696	17.8571	34.6821	21.3018	48.3333		0 ± 0	0 ± 0	0 ± 0		0.0081 ± 0.0152	0.0024 ± 0.0060	0.0135 ± 0.0190	0.0066 ± 0.0138	0.0096 ± 0.0164	0.0069 ± 0.0136	0.0093 ± 0.0167	0.0078 ± 0.0153	0.0084 ± 0.0151	0.0088 ± 0.0160	0.0074 ± 0.0144	0.0051 ± 0.0114	0.0078 ± 0.0155	0.0084 ± 0.0150	0.0110 ± 0.0179	0.0022 ± 0.0061	0.0109 ± 0.0174	0.0027 ± 0.0059	0.0160 ± 0.0201	0.0024 ± 0.0056	0.0112 ± 0.0170	0.0025 ± 0.0064	0.0160 ± 0.0206	0.0060 ± 0.0133	0.0072 ± 0.0144	0.0095 ± 0.0169	0.0097 ± 0.0158	0.0070 ± 0.0135	0.0069 ± 0.0137	0.0086 ± 0.0170	0.0101 ± 0.0164	0.0025 ± 0.0062	0.0128 ± 0.0192	0.0024 ± 0.0059
278	Bacteroidota	Muribaculaceae	Muribaculaceae	100		100	100	100	100	100		38.50 ± 7.27	40.09 ± 7.41	35.48 ± 6.10		16.55 ± 6.99	19.32 ± 7.02	13.90 ± 5.85	17.19 ± 7.49	15.91 ± 6.40	16.39 ± 6.79	16.70 ± 7.19	16.43 ± 6.89	16.66 ± 7.10	17.23 ± 6.64	15.78 ± 7.29	16.94 ± 7.26	17.40 ± 7.69	15.96 ± 6.37	15.86 ± 6.46	20.84 ± 7.05	13.65 ± 6.08	17.80 ± 6.66	14.14 ± 5.62	19.07 ± 6.88	13.92 ± 5.69	19.57 ± 7.16	13.88 ± 6.02	16.95 ± 7.66	17.44 ± 7.33	15.94 ± 6.03	15.88 ± 6.80	16.25 ± 6.60	16.55 ± 7.00	16.62 ± 7.18	16.78 ± 7.22	19.27 ± 7.02	13.78 ± 5.60	19.36 ± 7.04
279	Bacteroidota	Rikenellaceae	Alistipes	58.1818		100	100	100	100	100		0.50 ± 0.91	0.48 ± 0.94	0.54 ± 0.87		3.53 ± 1.59	2.81 ± 1.37	4.21 ± 1.48	3.51 ± 1.72	3.55 ± 1.46	3.58 ± 1.64	3.47 ± 1.54	3.58 ± 1.71	3.47 ± 1.45	3.40 ± 1.49	3.66 ± 1.68	3.57 ± 1.79	3.45 ± 1.65	3.59 ± 1.51	3.48 ± 1.39	2.62 ± 1.36	4.37 ± 1.58	3.00 ± 1.37	4.06 ± 1.35	2.82 ± 1.41	4.29 ± 1.52	2.80 ± 1.34	4.13 ± 1.43	3.67 ± 1.93	3.34 ± 1.45	3.49 ± 1.47	3.60 ± 1.44	3.68 ± 1.79	3.48 ± 1.46	3.47 ± 1.63	3.46 ± 1.44	2.65 ± 1.30	4.44 ± 1.59	2.98 ± 1.43
280	Bacteroidota	Rikenellaceae	Rikenella	1.81818		69.4203	65.4762	72.8324	65.0888	73.8889		0.017 ± 0.124	0.000 ± 0.000	0.048 ± 0.210		0.26 ± 0.52	0.11 ± 0.20	0.40 ± 0.67	0.32 ± 0.64	0.20 ± 0.35	0.24 ± 0.42	0.28 ± 0.60	0.29 ± 0.59	0.22 ± 0.43	0.23 ± 0.38	0.29 ± 0.64	0.29 ± 0.51	0.34 ± 0.74	0.20 ± 0.34	0.20 ± 0.36	0.12 ± 0.21	0.51 ± 0.84	0.11 ± 0.19	0.29 ± 0.43	0.13 ± 0.20	0.35 ± 0.53	0.10 ± 0.20	0.45 ± 0.79	0.37 ± 0.75	0.27 ± 0.52	0.22 ± 0.38	0.18 ± 0.31	0.26 ± 0.44	0.22 ± 0.41	0.33 ± 0.71	0.22 ± 0.45	0.11 ± 0.18	0.47 ± 0.76	0.12 ± 0.22
281	Bacteroidota	Rs-E47_termite_group	Rs-E47_termite_group	38.1818		75.7971	63.0952	81.5029	72.1893	85.5556		0.41 ± 1.12	0.18 ± 0.38	0.84 ± 1.79		3.52 ± 3.59	1.45 ± 2.02	5.49 ± 3.65	3.31 ± 3.63	3.72 ± 3.53	3.66 ± 3.65	3.37 ± 3.53	3.23 ± 3.61	3.82 ± 3.54	3.65 ± 3.47	3.37 ± 3.71	3.38 ± 3.59	3.25 ± 3.68	3.89 ± 3.69	3.52 ± 3.34	1.11 ± 1.67	5.44 ± 3.75	1.79 ± 2.26	5.53 ± 3.56	1.65 ± 2.25	5.53 ± 3.70	1.26 ± 1.74	5.44 ± 3.61	3.02 ± 3.68	3.60 ± 3.57	3.42 ± 3.54	4.04 ± 3.51	3.26 ± 3.68	4.07 ± 3.57	3.19 ± 3.54	3.56 ± 3.51	1.22 ± 1.80	5.10 ± 3.87	1.69 ± 2.20
282	Bacteroidota	Marinifilaceae	Odoribacter	7.27273		97.1014	94.6429	95.9538	100	97.7778		0.018 ± 0.112	0.001 ± 0.005	0.050 ± 0.190		1.77 ± 1.58	1.22 ± 1.05	2.29 ± 1.82	1.71 ± 1.68	1.83 ± 1.49	1.79 ± 1.54	1.74 ± 1.63	1.87 ± 1.74	1.66 ± 1.39	1.55 ± 1.35	2.01 ± 1.78	1.79 ± 1.71	1.63 ± 1.65	1.79 ± 1.39	1.87 ± 1.60	1.00 ± 0.92	2.40 ± 1.94	1.44 ± 1.12	2.18 ± 1.69	1.26 ± 1.06	2.28 ± 1.74	1.18 ± 1.04	2.29 ± 1.90	1.82 ± 1.86	1.58 ± 1.47	1.92 ± 1.62	1.73 ± 1.32	1.99 ± 1.75	1.59 ± 1.25	1.76 ± 1.72	1.73 ± 1.53	1.25 ± 1.13	2.46 ± 1.99	1.19 ± 0.96
283	Bacteroidota	__	__	0		66.8116	54.7619	68.2081	68.6391	75		0 ± 0	0 ± 0	0 ± 0		1.46 ± 2.07	0.78 ± 1.27	2.12 ± 2.43	1.58 ± 2.33	1.36 ± 1.77	1.45 ± 1.96	1.48 ± 2.18	1.46 ± 2.17	1.47 ± 1.95	1.46 ± 1.91	1.47 ± 2.23	1.49 ± 2.04	1.64 ± 2.54	1.41 ± 1.89	1.28 ± 1.62	0.69 ± 1.20	2.44 ± 2.79	0.87 ± 1.34	1.81 ± 2.00	0.78 ± 1.17	2.07 ± 2.31	0.77 ± 1.37	2.17 ± 2.57	1.60 ± 2.48	1.55 ± 2.16	1.32 ± 1.82	1.39 ± 1.72	1.50 ± 2.09	1.40 ± 1.81	1.42 ± 2.26	1.55 ± 2.09	0.74 ± 1.25	2.13 ± 2.60	0.81 ± 1.30
286	Desulfobacterota	Desulfovibrionaceae	Desulfovibrio	98.1818		100	100	100	100	100		5.79 ± 2.85	5.37 ± 2.96	6.57 ± 2.54		8.07 ± 3.63	6.14 ± 2.88	9.91 ± 3.30	7.60 ± 3.62	8.53 ± 3.58	8.07 ± 3.50	8.07 ± 3.76	8.29 ± 3.79	7.85 ± 3.44	7.70 ± 3.43	8.49 ± 3.80	7.53 ± 3.40	7.67 ± 3.81	8.51 ± 3.52	8.55 ± 3.66	5.65 ± 2.87	9.51 ± 3.26	6.64 ± 2.82	10.31 ± 3.30	6.26 ± 2.89	9.76 ± 3.17	6.03 ± 2.89	10.07 ± 3.43	7.97 ± 3.79	7.23 ± 3.42	8.59 ± 3.79	8.46 ± 3.35	8.27 ± 3.62	7.87 ± 3.37	8.30 ± 3.97	7.82 ± 3.52	6.13 ± 2.76	10.30 ± 3.51	6.16 ± 3.02
287	Desulfobacterota	Desulfovibrionaceae	Bilophila	100		97.6812	94.6429	100	96.4497	99.4444		0.17 ± 0.17	0.14 ± 0.11	0.22 ± 0.24		0.33 ± 0.39	0.10 ± 0.10	0.56 ± 0.42	0.36 ± 0.43	0.30 ± 0.34	0.34 ± 0.41	0.32 ± 0.36	0.36 ± 0.42	0.31 ± 0.35	0.35 ± 0.42	0.32 ± 0.35	0.39 ± 0.46	0.35 ± 0.40	0.31 ± 0.36	0.29 ± 0.30	0.09 ± 0.09	0.63 ± 0.46	0.10 ± 0.11	0.49 ± 0.37	0.10 ± 0.11	0.57 ± 0.46	0.09 ± 0.09	0.55 ± 0.38	0.39 ± 0.47	0.33 ± 0.39	0.33 ± 0.37	0.28 ± 0.29	0.38 ± 0.47	0.30 ± 0.33	0.33 ± 0.36	0.31 ± 0.36	0.10 ± 0.11	0.60 ± 0.46	0.09 ± 0.08
288	Desulfobacterota	Desulfovibrionaceae	__	1.81818		27.971	19.0476	29.4798	25.4438	37.2222		0.014 ± 0.105	0.000 ± 0.000	0.041 ± 0.179		0.095 ± 0.471	0.049 ± 0.251	0.140 ± 0.608	0.057 ± 0.260	0.133 ± 0.608	0.119 ± 0.581	0.072 ± 0.320	0.128 ± 0.608	0.061 ± 0.253	0.118 ± 0.595	0.071 ± 0.272	0.061 ± 0.246	0.054 ± 0.271	0.164 ± 0.746	0.094 ± 0.370	0.023 ± 0.095	0.091 ± 0.350	0.076 ± 0.340	0.187 ± 0.778	0.055 ± 0.210	0.178 ± 0.778	0.043 ± 0.286	0.100 ± 0.349	0.042 ± 0.176	0.073 ± 0.324	0.211 ± 0.825	0.049 ± 0.153	0.161 ± 0.770	0.075 ± 0.266	0.095 ± 0.379	0.047 ± 0.239	0.063 ± 0.322	0.189 ± 0.782	0.035 ± 0.144
289	Desulfobacterota	Desulfovibrionaceae	uncultured	100		76.5217	68.4524	93.6416	49.7041	92.7778		0.21 ± 0.35	0.18 ± 0.39	0.28 ± 0.29		0.030 ± 0.055	0.010 ± 0.013	0.048 ± 0.071	0.035 ± 0.073	0.024 ± 0.028	0.028 ± 0.036	0.031 ± 0.070	0.030 ± 0.070	0.029 ± 0.033	0.037 ± 0.072	0.022 ± 0.025	0.034 ± 0.043	0.036 ± 0.090	0.024 ± 0.029	0.025 ± 0.028	0.013 ± 0.015	0.057 ± 0.096	0.007 ± 0.010	0.040 ± 0.031	0.010 ± 0.013	0.046 ± 0.042	0.010 ± 0.013	0.051 ± 0.093	0.039 ± 0.096	0.031 ± 0.036	0.022 ± 0.028	0.027 ± 0.029	0.028 ± 0.037	0.029 ± 0.035	0.033 ± 0.092	0.029 ± 0.031	0.009 ± 0.012	0.050 ± 0.093	0.011 ± 0.014
290	Desulfobacterota	__	__	54.5455		92.029	89.2857	93.0636	94.6746	91.1111		0.12 ± 0.35	0.15 ± 0.42	0.08 ± 0.17		0.51 ± 0.68	0.65 ± 0.85	0.37 ± 0.44	0.41 ± 0.52	0.61 ± 0.80	0.54 ± 0.74	0.48 ± 0.62	0.49 ± 0.68	0.53 ± 0.69	0.51 ± 0.73	0.51 ± 0.63	0.40 ± 0.52	0.42 ± 0.52	0.65 ± 0.87	0.56 ± 0.71	0.50 ± 0.61	0.33 ± 0.40	0.81 ± 1.01	0.42 ± 0.46	0.71 ± 0.94	0.38 ± 0.44	0.60 ± 0.74	0.37 ± 0.43	0.43 ± 0.56	0.39 ± 0.48	0.55 ± 0.77	0.68 ± 0.83	0.52 ± 0.76	0.55 ± 0.73	0.46 ± 0.59	0.51 ± 0.65	0.63 ± 0.85	0.36 ± 0.41	0.67 ± 0.85
292	Spirochaetota	Spirochaetaceae	Termite_Treponema_cluster	7.27273		68.9855	72.619	67.6301	71.0059	65		0.051 ± 0.277	0.050 ± 0.299	0.054 ± 0.235		4.32 ± 6.53	7.77 ± 7.90	1.04 ± 1.35	4.66 ± 6.81	4.00 ± 6.24	4.35 ± 6.57	4.29 ± 6.50	4.18 ± 6.18	4.48 ± 6.89	4.31 ± 6.62	4.34 ± 6.44	4.87 ± 6.84	4.49 ± 6.81	3.94 ± 6.34	4.07 ± 6.13	8.22 ± 8.18	1.20 ± 1.53	7.31 ± 7.60	0.88 ± 1.13	7.87 ± 8.01	1.09 ± 1.34	7.66 ± 7.81	0.99 ± 1.37	4.41 ± 6.58	4.92 ± 7.05	3.96 ± 5.77	4.04 ± 6.73	4.19 ± 6.41	4.52 ± 6.75	4.17 ± 5.95	4.43 ± 7.06	7.61 ± 7.39	0.97 ± 1.28	7.93 ± 8.41
293	Spirochaetota	Spirochaetaceae	Treponema	0		43.6232	48.2143	39.8844	47.929	38.8889		0 ± 0	0 ± 0	0 ± 0		0.17 ± 0.30	0.14 ± 0.21	0.20 ± 0.37	0.18 ± 0.30	0.16 ± 0.30	0.18 ± 0.32	0.15 ± 0.28	0.18 ± 0.31	0.16 ± 0.29	0.18 ± 0.32	0.16 ± 0.28	0.20 ± 0.33	0.15 ± 0.28	0.17 ± 0.31	0.16 ± 0.29	0.15 ± 0.21	0.20 ± 0.37	0.12 ± 0.21	0.20 ± 0.37	0.14 ± 0.21	0.22 ± 0.40	0.13 ± 0.21	0.18 ± 0.34	0.19 ± 0.31	0.17 ± 0.30	0.17 ± 0.31	0.16 ± 0.29	0.18 ± 0.33	0.18 ± 0.31	0.17 ± 0.29	0.14 ± 0.27	0.13 ± 0.18	0.22 ± 0.39	0.14 ± 0.23
295	Spirochaetota	Brachyspiraceae	Brachyspira	45.4545		81.7391	79.7619	82.659	80.4734	83.8889		0.0096 ± 0.0168	0.0087 ± 0.0171	0.0114 ± 0.0164		0.026 ± 0.026	0.024 ± 0.026	0.028 ± 0.026	0.025 ± 0.026	0.027 ± 0.027	0.027 ± 0.026	0.026 ± 0.026	0.027 ± 0.027	0.026 ± 0.025	0.025 ± 0.025	0.028 ± 0.027	0.024 ± 0.023	0.026 ± 0.028	0.030 ± 0.029	0.025 ± 0.023	0.023 ± 0.024	0.027 ± 0.027	0.026 ± 0.028	0.029 ± 0.025	0.025 ± 0.027	0.029 ± 0.025	0.024 ± 0.025	0.027 ± 0.027	0.024 ± 0.025	0.026 ± 0.027	0.030 ± 0.029	0.025 ± 0.024	0.029 ± 0.029	0.025 ± 0.024	0.025 ± 0.025	0.026 ± 0.027	0.025 ± 0.028	0.029 ± 0.026	0.024 ± 0.024
296	Campilobacterota	Helicobacteraceae	Helicobacter	98.1818		86.2319	90.4762	94.2197	73.9645	86.1111		6.79 ± 4.94	5.51 ± 4.72	9.22 ± 4.53		2.95 ± 3.28	2.30 ± 2.56	3.57 ± 3.74	3.23 ± 2.97	2.68 ± 3.54	2.90 ± 3.29	3.00 ± 3.28	2.97 ± 3.31	2.93 ± 3.26	3.34 ± 3.62	2.52 ± 2.80	3.31 ± 2.96	3.15 ± 2.98	2.57 ± 3.50	2.82 ± 3.60	2.57 ± 2.24	3.86 ± 3.43	2.03 ± 2.83	3.30 ± 4.01	2.19 ± 2.40	3.56 ± 3.82	2.40 ± 2.71	3.59 ± 3.67	3.44 ± 3.03	3.00 ± 2.90	2.52 ± 3.50	2.86 ± 3.59	2.96 ± 3.25	2.85 ± 3.33	2.99 ± 3.37	3.02 ± 3.18	2.28 ± 2.58	3.62 ± 3.76	2.32 ± 2.55
297	Proteobacteria	uncultured	uncultured	94.5455		100	100	100	100	100		1.53 ± 1.47	1.79 ± 1.46	1.06 ± 1.41		1.87 ± 1.54	2.25 ± 1.77	1.50 ± 1.19	1.68 ± 1.42	2.06 ± 1.64	1.85 ± 1.56	1.89 ± 1.53	1.94 ± 1.59	1.80 ± 1.50	1.75 ± 1.49	2.00 ± 1.59	1.64 ± 1.39	1.70 ± 1.44	2.02 ± 1.67	2.11 ± 1.61	1.90 ± 1.63	1.45 ± 1.13	2.60 ± 1.83	1.55 ± 1.24	2.25 ± 1.83	1.47 ± 1.15	2.25 ± 1.71	1.53 ± 1.23	1.69 ± 1.47	1.66 ± 1.36	2.18 ± 1.66	1.93 ± 1.61	1.93 ± 1.67	1.77 ± 1.44	1.95 ± 1.50	1.82 ± 1.56	2.33 ± 1.78	1.57 ± 1.27	2.17 ± 1.75
298	Proteobacteria	Paracaedibacteraceae	uncultured	92.7273		89.7101	88.6905	78.0347	96.4497	95.5556		0.53 ± 0.65	0.60 ± 0.73	0.39 ± 0.47		0.64 ± 0.83	0.92 ± 1.00	0.37 ± 0.51	0.51 ± 0.75	0.76 ± 0.89	0.65 ± 0.79	0.63 ± 0.87	0.62 ± 0.78	0.65 ± 0.89	0.62 ± 0.80	0.66 ± 0.87	0.48 ± 0.65	0.53 ± 0.82	0.78 ± 0.87	0.74 ± 0.91	0.66 ± 0.84	0.36 ± 0.61	1.18 ± 1.07	0.38 ± 0.39	0.94 ± 0.94	0.37 ± 0.50	0.89 ± 1.05	0.36 ± 0.52	0.51 ± 0.74	0.51 ± 0.76	0.73 ± 0.80	0.80 ± 0.98	0.68 ± 0.81	0.62 ± 0.78	0.57 ± 0.75	0.69 ± 0.98	0.89 ± 0.90	0.37 ± 0.53	0.95 ± 1.09
299	Proteobacteria	Rhizobiales_Incertae_Sedis	Bauldia	1.81818		16.5217	15.4762	21.3873	11.2426	17.7778		0.0065 ± 0.0485	0.0000 ± 0.0000	0.0189 ± 0.0825		0.026 ± 0.148	0.032 ± 0.196	0.020 ± 0.076	0.037 ± 0.198	0.015 ± 0.066	0.027 ± 0.115	0.024 ± 0.175	0.022 ± 0.082	0.030 ± 0.194	0.028 ± 0.120	0.024 ± 0.173	0.043 ± 0.159	0.032 ± 0.227	0.015 ± 0.058	0.015 ± 0.076	0.049 ± 0.268	0.026 ± 0.088	0.015 ± 0.072	0.014 ± 0.061	0.028 ± 0.134	0.026 ± 0.094	0.036 ± 0.243	0.013 ± 0.049	0.025 ± 0.088	0.049 ± 0.268	0.018 ± 0.076	0.011 ± 0.054	0.025 ± 0.086	0.029 ± 0.139	0.018 ± 0.077	0.031 ± 0.239	0.020 ± 0.076	0.023 ± 0.088	0.044 ± 0.269
300	Proteobacteria	uncultured	uncultured	78.1818		35.7971	40.4762	32.3699	40.8284	30		0.44 ± 0.59	0.42 ± 0.61	0.47 ± 0.56		0.014 ± 0.035	0.017 ± 0.043	0.010 ± 0.026	0.017 ± 0.042	0.011 ± 0.026	0.012 ± 0.035	0.015 ± 0.036	0.013 ± 0.036	0.014 ± 0.035	0.015 ± 0.038	0.012 ± 0.032	0.015 ± 0.043	0.019 ± 0.042	0.010 ± 0.027	0.012 ± 0.026	0.021 ± 0.052	0.012 ± 0.030	0.013 ± 0.031	0.009 ± 0.020	0.015 ± 0.043	0.010 ± 0.025	0.020 ± 0.043	0.011 ± 0.026	0.016 ± 0.044	0.018 ± 0.041	0.010 ± 0.026	0.011 ± 0.026	0.012 ± 0.041	0.012 ± 0.027	0.014 ± 0.030	0.017 ± 0.041	0.016 ± 0.043	0.010 ± 0.028	0.018 ± 0.043
301	Proteobacteria	Cellvibrionaceae	__	45.4545		40.5797	39.2857	44.5087	39.645	38.8889		0.24 ± 0.64	0.20 ± 0.50	0.30 ± 0.86		0.21 ± 0.45	0.21 ± 0.44	0.21 ± 0.46	0.23 ± 0.48	0.20 ± 0.42	0.23 ± 0.48	0.19 ± 0.42	0.17 ± 0.38	0.26 ± 0.51	0.23 ± 0.47	0.20 ± 0.42	0.26 ± 0.53	0.20 ± 0.43	0.21 ± 0.44	0.19 ± 0.40	0.21 ± 0.42	0.24 ± 0.53	0.22 ± 0.45	0.19 ± 0.39	0.21 ± 0.43	0.25 ± 0.52	0.21 ± 0.44	0.17 ± 0.39	0.18 ± 0.40	0.28 ± 0.54	0.17 ± 0.36	0.24 ± 0.47	0.20 ± 0.44	0.27 ± 0.51	0.15 ± 0.29	0.24 ± 0.51	0.15 ± 0.32	0.19 ± 0.42	0.28 ± 0.52
302	Proteobacteria	Oxalobacteraceae	Oxalobacter	54.5455		91.4493	85.7143	96.5318	88.1657	95		0.034 ± 0.047	0.020 ± 0.026	0.059 ± 0.066		0.081 ± 0.060	0.038 ± 0.031	0.122 ± 0.052	0.084 ± 0.064	0.078 ± 0.056	0.081 ± 0.059	0.082 ± 0.061	0.080 ± 0.063	0.083 ± 0.057	0.081 ± 0.059	0.082 ± 0.061	0.084 ± 0.064	0.085 ± 0.064	0.078 ± 0.056	0.078 ± 0.057	0.038 ± 0.033	0.130 ± 0.053	0.038 ± 0.030	0.116 ± 0.049	0.037 ± 0.029	0.121 ± 0.052	0.039 ± 0.034	0.124 ± 0.051	0.087 ± 0.069	0.082 ± 0.058	0.073 ± 0.056	0.084 ± 0.056	0.080 ± 0.060	0.082 ± 0.059	0.080 ± 0.066	0.084 ± 0.055	0.035 ± 0.032	0.121 ± 0.056	0.041 ± 0.031
303	Proteobacteria	Nitrosomonadaceae	Nitrosomonas	90.9091		84.2029	73.8095	92.4855	75.1479	94.4444		0.027 ± 0.023	0.025 ± 0.016	0.031 ± 0.032		0.023 ± 0.020	0.013 ± 0.013	0.032 ± 0.022	0.022 ± 0.019	0.023 ± 0.021	0.023 ± 0.020	0.022 ± 0.020	0.023 ± 0.020	0.023 ± 0.021	0.023 ± 0.020	0.022 ± 0.020	0.022 ± 0.018	0.022 ± 0.020	0.024 ± 0.021	0.022 ± 0.021	0.013 ± 0.012	0.031 ± 0.021	0.014 ± 0.013	0.032 ± 0.023	0.014 ± 0.013	0.032 ± 0.021	0.013 ± 0.012	0.032 ± 0.023	0.023 ± 0.019	0.022 ± 0.020	0.023 ± 0.021	0.024 ± 0.021	0.023 ± 0.019	0.023 ± 0.021	0.022 ± 0.021	0.022 ± 0.020	0.013 ± 0.012	0.032 ± 0.021	0.014 ± 0.014
307	Proteobacteria	Pasteurellaceae	__	23.6364		23.3333	18.4524	28.3237	23.0769	23.3333		0.0054 ± 0.0147	0.0063 ± 0.0168	0.0036 ± 0.0099		0.0037 ± 0.0105	0.0028 ± 0.0067	0.0045 ± 0.0132	0.0042 ± 0.0132	0.0031 ± 0.0070	0.0038 ± 0.0114	0.0035 ± 0.0097	0.0036 ± 0.0080	0.0037 ± 0.0127	0.0039 ± 0.0128	0.0034 ± 0.0073	0.0046 ± 0.0148	0.0040 ± 0.0118	0.0032 ± 0.0076	0.0029 ± 0.0061	0.0027 ± 0.0071	0.0057 ± 0.0171	0.0029 ± 0.0062	0.0033 ± 0.0076	0.0023 ± 0.0059	0.0052 ± 0.0146	0.0032 ± 0.0074	0.0037 ± 0.0115	0.0036 ± 0.0083	0.0049 ± 0.0168	0.0036 ± 0.0078	0.0026 ± 0.0060	0.0043 ± 0.0098	0.0033 ± 0.0128	0.0028 ± 0.0057	0.0042 ± 0.0126	0.0030 ± 0.0065	0.0042 ± 0.0092	0.0026 ± 0.0069
315	Deferribacterota	Deferribacteraceae	Mucispirillum	74.5455		93.7681	88.0952	99.422	88.7574	98.3333		0.71 ± 1.99	0.34 ± 0.83	1.43 ± 3.11		1.58 ± 1.66	1.50 ± 1.79	1.65 ± 1.53	1.34 ± 1.65	1.81 ± 1.65	1.52 ± 1.60	1.64 ± 1.72	1.56 ± 1.67	1.60 ± 1.65	1.55 ± 1.66	1.61 ± 1.67	1.07 ± 1.37	1.57 ± 1.81	1.87 ± 1.67	1.72 ± 1.61	1.17 ± 1.64	1.51 ± 1.64	1.83 ± 1.88	1.79 ± 1.40	1.44 ± 1.71	1.59 ± 1.49	1.56 ± 1.87	1.72 ± 1.57	1.31 ± 1.65	1.38 ± 1.65	1.80 ± 1.67	1.82 ± 1.63	1.59 ± 1.61	1.44 ± 1.59	1.52 ± 1.74	1.76 ± 1.70	1.61 ± 1.81	1.51 ± 1.54	1.39 ± 1.77
316	Verrucomicrobiota	Puniceicoccaceae	__	78.1818		92.3188	99.4048	91.9075	94.0828	84.4444		0.61 ± 0.92	0.76 ± 1.05	0.31 ± 0.48		0.92 ± 1.17	1.41 ± 1.32	0.46 ± 0.75	1.10 ± 1.23	0.75 ± 1.07	0.96 ± 1.31	0.89 ± 1.00	0.93 ± 1.18	0.92 ± 1.16	0.80 ± 1.01	1.06 ± 1.31	1.09 ± 1.38	1.11 ± 1.10	0.85 ± 1.24	0.63 ± 0.80	1.60 ± 1.32	0.63 ± 0.93	1.22 ± 1.30	0.31 ± 0.47	1.49 ± 1.48	0.46 ± 0.87	1.32 ± 1.14	0.47 ± 0.60	1.12 ± 1.33	1.09 ± 1.13	0.75 ± 0.99	0.75 ± 1.16	0.99 ± 1.40	0.92 ± 1.20	0.86 ± 0.89	0.92 ± 1.11	1.40 ± 1.28	0.48 ± 0.87	1.41 ± 1.37
317	Verrucomicrobiota	Puniceicoccaceae	uncultured	20		21.3043	0.595238	0	49.1124	35		0.16 ± 0.52	0.20 ± 0.62	0.07 ± 0.22		0.12 ± 0.45	0.22 ± 0.63	0.02 ± 0.07	0.00 ± 0.00	0.23 ± 0.62	0.12 ± 0.44	0.11 ± 0.47	0.14 ± 0.52	0.09 ± 0.37	0.09 ± 0.42	0.15 ± 0.48	0.00 ± 0.00	0.00 ± 0.00	0.22 ± 0.58	0.25 ± 0.67	0.00 ± 0.00	0.00 ± 0.00	0.43 ± 0.84	0.04 ± 0.10	0.22 ± 0.62	0.02 ± 0.08	0.21 ± 0.64	0.02 ± 0.07	0.00 ± 0.00	0.00 ± 0.00	0.27 ± 0.70	0.19 ± 0.51	0.12 ± 0.46	0.13 ± 0.42	0.16 ± 0.57	0.06 ± 0.31	0.27 ± 0.72	0.02 ± 0.07	0.17 ± 0.52
319	Actinobacteriota	Eggerthellaceae	Enterorhabdus	80		99.8551	100	100	100	99.4444		0.052 ± 0.068	0.032 ± 0.034	0.089 ± 0.097		0.29 ± 0.22	0.15 ± 0.08	0.42 ± 0.22	0.30 ± 0.23	0.27 ± 0.21	0.29 ± 0.22	0.28 ± 0.21	0.29 ± 0.22	0.28 ± 0.21	0.27 ± 0.21	0.30 ± 0.22	0.29 ± 0.22	0.30 ± 0.23	0.29 ± 0.22	0.26 ± 0.18	0.15 ± 0.07	0.44 ± 0.23	0.14 ± 0.08	0.40 ± 0.21	0.14 ± 0.08	0.42 ± 0.22	0.15 ± 0.07	0.41 ± 0.22	0.30 ± 0.22	0.29 ± 0.23	0.29 ± 0.23	0.26 ± 0.18	0.31 ± 0.23	0.27 ± 0.20	0.28 ± 0.22	0.29 ± 0.21	0.14 ± 0.08	0.43 ± 0.23	0.15 ± 0.08
320	Actinobacteriota	Eggerthellaceae	__	0		60.2899	53.5714	68.7861	43.1953	74.4444		0 ± 0	0 ± 0	0 ± 0		0.022 ± 0.040	0.012 ± 0.021	0.032 ± 0.050	0.026 ± 0.045	0.019 ± 0.033	0.023 ± 0.039	0.022 ± 0.041	0.023 ± 0.041	0.022 ± 0.039	0.021 ± 0.036	0.024 ± 0.044	0.025 ± 0.040	0.026 ± 0.050	0.021 ± 0.038	0.017 ± 0.026	0.013 ± 0.023	0.038 ± 0.057	0.011 ± 0.020	0.027 ± 0.041	0.014 ± 0.024	0.031 ± 0.048	0.010 ± 0.018	0.034 ± 0.052	0.027 ± 0.046	0.024 ± 0.045	0.019 ± 0.034	0.020 ± 0.033	0.023 ± 0.038	0.023 ± 0.040	0.023 ± 0.043	0.021 ± 0.039	0.012 ± 0.021	0.033 ± 0.050	0.012 ± 0.021
321	Actinobacteriota	Eggerthellaceae	Adlercreutzia	49.0909		67.971	69.0476	71.0983	68.0473	63.8889		0.013 ± 0.023	0.006 ± 0.010	0.026 ± 0.034		0.022 ± 0.023	0.023 ± 0.023	0.021 ± 0.023	0.023 ± 0.024	0.021 ± 0.023	0.023 ± 0.024	0.021 ± 0.023	0.024 ± 0.025	0.020 ± 0.021	0.021 ± 0.020	0.024 ± 0.026	0.023 ± 0.024	0.023 ± 0.024	0.022 ± 0.024	0.019 ± 0.021	0.022 ± 0.021	0.025 ± 0.027	0.024 ± 0.025	0.018 ± 0.019	0.024 ± 0.024	0.022 ± 0.023	0.022 ± 0.022	0.021 ± 0.024	0.025 ± 0.027	0.021 ± 0.021	0.023 ± 0.024	0.018 ± 0.020	0.026 ± 0.026	0.020 ± 0.022	0.023 ± 0.025	0.019 ± 0.019	0.024 ± 0.024	0.024 ± 0.027	0.021 ± 0.022
323	Actinobacteriota	Coriobacteriales_Incertae_Sedis	uncultured	0		32.1739	13.6905	41.0405	4.73373	66.6667		0 ± 0	0 ± 0	0 ± 0		0.032 ± 0.145	0.031 ± 0.183	0.032 ± 0.096	0.041 ± 0.188	0.022 ± 0.082	0.037 ± 0.178	0.026 ± 0.100	0.031 ± 0.152	0.032 ± 0.137	0.037 ± 0.175	0.025 ± 0.102	0.056 ± 0.250	0.029 ± 0.113	0.022 ± 0.083	0.023 ± 0.081	0.055 ± 0.252	0.028 ± 0.090	0.007 ± 0.049	0.036 ± 0.102	0.039 ± 0.230	0.035 ± 0.110	0.023 ± 0.118	0.029 ± 0.078	0.039 ± 0.200	0.043 ± 0.177	0.024 ± 0.086	0.020 ± 0.077	0.039 ± 0.195	0.034 ± 0.159	0.023 ± 0.091	0.029 ± 0.109	0.028 ± 0.192	0.035 ± 0.103	0.035 ± 0.173
324	Actinobacteriota	Bifidobacteriaceae	Bifidobacterium	50.9091		11.7391	12.5	0.578035	31.3609	3.33333		1.42 ± 2.61	2.17 ± 2.98	0.00 ± 0.00		0.10 ± 0.62	0.20 ± 0.87	0.00 ± 0.00	0.02 ± 0.19	0.18 ± 0.84	0.09 ± 0.44	0.12 ± 0.76	0.15 ± 0.77	0.05 ± 0.39	0.09 ± 0.62	0.11 ± 0.61	0.02 ± 0.21	0.02 ± 0.18	0.14 ± 0.56	0.23 ± 1.10	0.04 ± 0.27	0.00 ± 0.00	0.37 ± 1.18	0.00 ± 0.01	0.18 ± 0.63	0.00 ± 0.01	0.23 ± 1.06	0.00 ± 0.00	0.02 ± 0.19	0.02 ± 0.20	0.27 ± 1.05	0.09 ± 0.52	0.12 ± 0.55	0.05 ± 0.30	0.17 ± 0.95	0.06 ± 0.47	0.30 ± 1.09	0.00 ± 0.01	0.11 ± 0.56
325	Actinobacteriota	Corynebacteriaceae	Corynebacterium	65.4545		58.8406	47.0238	65.896	57.9882	63.8889		0.016 ± 0.021	0.015 ± 0.020	0.017 ± 0.023		0.016 ± 0.053	0.014 ± 0.067	0.018 ± 0.034	0.012 ± 0.018	0.021 ± 0.072	0.018 ± 0.070	0.014 ± 0.025	0.017 ± 0.034	0.016 ± 0.068	0.022 ± 0.072	0.010 ± 0.012	0.012 ± 0.018	0.011 ± 0.018	0.023 ± 0.093	0.018 ± 0.031	0.008 ± 0.013	0.015 ± 0.022	0.021 ± 0.094	0.021 ± 0.043	0.017 ± 0.094	0.020 ± 0.037	0.011 ± 0.017	0.017 ± 0.031	0.012 ± 0.019	0.011 ± 0.018	0.021 ± 0.044	0.021 ± 0.094	0.018 ± 0.038	0.019 ± 0.093	0.015 ± 0.030	0.013 ± 0.019	0.012 ± 0.020	0.021 ± 0.043	0.016 ± 0.094
326	Actinobacteriota	Dermabacteraceae	Brachybacterium	7.27273		17.6812	22.619	17.341	13.6095	17.2222		0.0004 ± 0.0015	0.0006 ± 0.0019	0.0000 ± 0.0000		0.0016 ± 0.0039	0.0017 ± 0.0039	0.0016 ± 0.0040	0.0018 ± 0.0042	0.0014 ± 0.0036	0.0015 ± 0.0037	0.0017 ± 0.0042	0.0016 ± 0.0040	0.0017 ± 0.0039	0.0016 ± 0.0040	0.0016 ± 0.0039	0.0019 ± 0.0041	0.0018 ± 0.0043	0.0012 ± 0.0033	0.0016 ± 0.0039	0.0020 ± 0.0042	0.0017 ± 0.0043	0.0013 ± 0.0035	0.0015 ± 0.0036	0.0015 ± 0.0035	0.0016 ± 0.0039	0.0018 ± 0.0043	0.0016 ± 0.0040	0.0020 ± 0.0043	0.0017 ± 0.0042	0.0012 ± 0.0036	0.0016 ± 0.0036	0.0015 ± 0.0038	0.0015 ± 0.0037	0.0017 ± 0.0042	0.0018 ± 0.0041	0.0016 ± 0.0038	0.0015 ± 0.0041	0.0017 ± 0.0040
327	Actinobacteriota	Micrococcaceae	Rothia	9.09091		11.1594	7.7381	13.8728	10.0592	12.7778		0.0008 ± 0.0034	0.0004 ± 0.0013	0.0015 ± 0.0055		0.0010 ± 0.0031	0.0007 ± 0.0026	0.0012 ± 0.0035	0.0009 ± 0.0027	0.0011 ± 0.0034	0.0010 ± 0.0030	0.0010 ± 0.0032	0.0011 ± 0.0033	0.0008 ± 0.0028	0.0009 ± 0.0030	0.0011 ± 0.0032	0.0006 ± 0.0021	0.0011 ± 0.0031	0.0012 ± 0.0035	0.0010 ± 0.0032	0.0005 ± 0.0018	0.0012 ± 0.0033	0.0009 ± 0.0031	0.0013 ± 0.0036	0.0006 ± 0.0022	0.0013 ± 0.0035	0.0009 ± 0.0028	0.0012 ± 0.0035	0.0010 ± 0.0028	0.0007 ± 0.0026	0.0013 ± 0.0037	0.0010 ± 0.0029	0.0011 ± 0.0033	0.0008 ± 0.0026	0.0012 ± 0.0034	0.0009 ± 0.0029	0.0008 ± 0.0027	0.0014 ± 0.0038	0.0006 ± 0.0024
330	Cyanobacteria	Gastranaerophilales	Gastranaerophilales	92.7273		91.5942	91.0714	91.3295	94.0828	90		1.21 ± 1.85	1.35 ± 2.08	0.93 ± 1.33		0.19 ± 0.28	0.19 ± 0.30	0.19 ± 0.26	0.21 ± 0.32	0.17 ± 0.24	0.17 ± 0.23	0.21 ± 0.33	0.17 ± 0.28	0.21 ± 0.28	0.22 ± 0.32	0.15 ± 0.22	0.21 ± 0.27	0.21 ± 0.36	0.14 ± 0.18	0.20 ± 0.29	0.22 ± 0.36	0.20 ± 0.26	0.15 ± 0.21	0.18 ± 0.26	0.15 ± 0.21	0.19 ± 0.24	0.22 ± 0.37	0.19 ± 0.28	0.19 ± 0.35	0.23 ± 0.28	0.15 ± 0.20	0.19 ± 0.28	0.14 ± 0.17	0.21 ± 0.27	0.20 ± 0.36	0.21 ± 0.29	0.18 ± 0.36	0.16 ± 0.19	0.20 ± 0.23
331	Patescibacteria	Saccharimonadaceae	Candidatus_Saccharimonas	1.81818		81.4493	65.4762	92.4855	74.5562	92.2222		0.0003 ± 0.0020	0.0004 ± 0.0024	0.0000 ± 0.0000		0.037 ± 0.036	0.016 ± 0.017	0.056 ± 0.038	0.038 ± 0.038	0.035 ± 0.033	0.038 ± 0.037	0.035 ± 0.034	0.038 ± 0.040	0.035 ± 0.031	0.036 ± 0.034	0.037 ± 0.037	0.040 ± 0.043	0.036 ± 0.034	0.036 ± 0.032	0.034 ± 0.035	0.017 ± 0.019	0.058 ± 0.041	0.015 ± 0.016	0.054 ± 0.035	0.016 ± 0.016	0.058 ± 0.039	0.017 ± 0.019	0.054 ± 0.036	0.039 ± 0.042	0.036 ± 0.033	0.037 ± 0.037	0.034 ± 0.029	0.040 ± 0.041	0.035 ± 0.032	0.036 ± 0.038	0.035 ± 0.030	0.015 ± 0.017	0.059 ± 0.043	0.017 ± 0.018
[truncated: 9 more columns]

## Sheet: TS5_ANCOVA_Pval_LSM_95CI
TS5. Results of ANCOVA models and adjusted least squares means (LSM) ± 95% confidence half-intervals (CI) of body mass at day 0 of the feeding trial, body mass change during the trial (MDFT), alpha diversity metrics: number of ASV (NASV), Shannon diversity index and Pielou evenness index, and the rate of food consumption (FC) or digestion (FD), and apparent digestive efficiency (ADE). Presented a…
			diet				individual's line type				cohabitant's line type				sex				cage type				indiv. × coh. line type						indiv. line type × diet						coh. line type × diet						indiv. × coh. line type × diet	coh. line type × cage type	sex × diet	indiv. line type × sex	coh. line type × sex	indiv. line type × cage type	cage type × sex	cage type × diet	mass at day 0
	variable		SD	LQD	p		C	H	p		C	H	p		male	female	p		SC	IVC	p		CC	CH	HC	HH	p		C, SD	C, LQD	H, SD	H, LQD	p		C, SD	C, LQD	H, SD	H, LQD	p		p	p	p	p	p	p	p	p	p
Variables measured in both cage types
	mass at day 0 [g]		n.a.	n.a.	n.a.		20.8 ± 1.4	23.1 ± 1.4	0.0294		22.0 ± 1.0	21.9 ± 1.0	0.4242		23.4 ± 1.0	20.6 ± 1.0	<.0001		21.4 ± 1.0	22.5 ± 1.0	0.0002		20.8 ± 1.4	20.8 ± 1.4	23.2 ± 1.4	23.1 ± 1.4	0.7098		n.a.	n.a.	n.a.	n.a.	n.a.		n.a.	n.a.	n.a.	n.a.	n.a.		n.a.	n.a.	n.a.	n.a.	n.a.	n.a.	0.0557	n.a.	n.a.
	MDFT [g]		1.07 ± 0.34	-1.25 ± 0.34	<.0001		-0.71 ± 0.35	0.54 ± 0.35	0.0001		-0.04 ± 0.26	-0.13 ± 0.26	0.3709		0.00 ± 0.26	-0.17 ± 0.26	0.0807		-0.79 ± 0.29	0.62 ± 0.30	<.0001		-0.72 ± 0.37	-0.70 ± 0.37	0.63 ± 0.37	0.44 ± 0.37	0.304		0.62 ± 0.49	-2.04 ± 0.49	1.53 ± 0.49	-0.45 ± 0.49	0.1546		1.14 ± 0.36	-1.23 ± 0.36	1.00 ± 0.36	-1.26 ± 0.36	0.5718		0.1758	n.a.	0.0166	n.a.	n.a.	n.a.	n.a.	<.0001	0.0216
	NASV		416 ± 17	498 ± 17	<.0001		450 ± 24	464 ± 24	0.3571		453 ± 18	460 ± 18	0.2297		448 ± 17	466 ± 17	0.0002		463 ± 18	451 ± 18	0.0939		447 ± 25	452 ± 25	460 ± 24	468 ± 25	0.7476		409 ± 24	491 ± 24	423 ± 24	505 ± 24	0.9092		413 ± 18	494 ± 18	419 ± 18	501 ± 18	0.9409		0.8172	n.a.	n.a.	n.a.	n.a.	n.a.	n.a.	n.a.	0.2827
	Shannon index		6.21 ± 0.08	7.07 ± 0.08	<.0001		6.61 ± 0.09	6.67 ± 0.09	0.319		6.66 ± 0.07	6.62 ± 0.07	0.3584		6.60 ± 0.07	6.68 ± 0.07	0.0096		6.67 ± 0.08	6.61 ± 0.08	0.1495		6.65 ± 0.10	6.57 ± 0.10	6.67 ± 0.10	6.67 ± 0.10	0.0792		6.18 ± 0.11	7.04 ± 0.10	6.24 ± 0.10	7.10 ± 0.10	0.9359		6.24 ± 0.09	7.08 ± 0.09	6.18 ± 0.09	7.07 ± 0.09	0.4341		0.6425	n.a.	n.a.	n.a.	n.a.	n.a.	n.a.	n.a.	0.0183
	Pielou index		0.715 ± 0.007	0.790 ± 0.007	<.0001		0.751 ± 0.007	0.754 ± 0.007	0.5485		0.755 ± 0.006	0.750 ± 0.006	0.1585		0.751 ± 0.006	0.754 ± 0.006	0.277		0.754 ± 0.006	0.751 ± 0.006	0.3979		0.756 ± 0.008	0.746 ± 0.008	0.754 ± 0.008	0.753 ± 0.008	0.1032		0.714 ± 0.009	0.789 ± 0.009	0.716 ± 0.009	0.792 ± 0.009	0.9613		0.719 ± 0.008	0.792 ± 0.008	0.711 ± 0.008	0.788 ± 0.008	0.4161		0.7585	n.a.	n.a.	n.a.	n.a.	n.a.	n.a.	n.a.	0.0267
Variables measured in standard cages (SC)
	MDFT [g]		0.80 ± 0.57	-2.47 ± 0.56	<.0001		-1.49 ± 0.59	-0.18 ± 0.56	0.0022		-0.78 ± 0.47	-0.89 ± 0.46	0.4459		-0.78 ± 0.45	-0.89 ± 0.48	0.5074		n.a.	n.a.	n.a.		-1.44 ± 0.63	-1.54 ± 0.61	-0.12 ± 0.60	-0.25 ± 0.59	0.9188		0.31 ± 0.78	-3.28 ± 0.77	1.30 ± 0.76	-1.67 ± 0.76	0.3691		0.95 ± 0.60	-2.51 ± 0.59	0.65 ± 0.59	-2.44 ± 0.59	0.1317		0.3173	n.a.	0.0125	n.a.	n.a.	n.a.	n.a.	n.a.	0.0966
Variables measured in individually-ventilated metabolic cages (IVC)
	MDFT [g]		1.26 ± 0.40	-0.10 ± 0.39	0.0003		0.00 ± 0.42	1.16 ± 0.42	0.0013		0.62 ± 0.35	0.54 ± 0.36	0.4602		0.70 ± 0.35	0.46 ± 0.36	0.0465		n.a.	n.a.	n.a.		-0.05 ± 0.45	0.06 ± 0.45	1.30 ± 0.44	1.01 ± 0.45	0.1002		0.85 ± 0.52	-0.84 ± 0.50	1.67 ± 0.50	0.65 ± 0.51	0.1457		1.25 ± 0.44	0.00 ± 0.41	1.26 ± 0.43	-0.19 ± 0.44	0.3835		0.3283	n.a.	n.a.	0.0518	n.a.	n.a.	n.a.	n.a.	0.1778
	FC [g/day]		5.29 ± 0.28	5.95 ± 0.27	0.0001		5.30 ± 0.35	5.93 ± 0.35	0.0157		5.62 ± 0.28	5.61 ± 0.28	0.8096		5.63 ± 0.28	5.60 ± 0.28	0.7355		n.a.	n.a.	n.a.		5.26 ± 0.36	5.35 ± 0.36	5.99 ± 0.35	5.86 ± 0.36	0.1289		5.08 ± 0.37	5.53 ± 0.35	5.49 ± 0.36	6.36 ± 0.36	0.0327		5.26 ± 0.30	5.99 ± 0.28	5.31 ± 0.30	5.91 ± 0.30	0.3827		0.8158	n.a.	n.a.	0.0802	0.0508	n.a.	n.a.	n.a.	<.0001
	ADE [%]		79.1 ± 0.8	57.6 ± 0.8	<.0001		68.4 ± 0.9	68.3 ± 0.9	0.833		68.5 ± 0.8	68.2 ± 0.8	0.2899		68.0 ± 0.8	68.6 ± 0.8	0.0255		n.a.	n.a.	n.a.		68.5 ± 1.0	68.2 ± 0.9	68.4 ± 0.9	68.1 ± 1.0	0.9297		79.1 ± 1.1	57.7 ± 1.0	79.1 ± 1.0	57.5 ± 1.0	0.7817		79.5 ± 0.9	57.5 ± 0.8	78.7 ± 0.9	57.7 ± 0.9	0.0325		0.6604	n.a.	0.0189	n.a.	n.a.	n.a.	n.a.	n.a.	<.0001
	FD [g/day]		4.15 ± 0.16	3.39 ± 0.15	<.0001		3.58 ± 0.18	3.96 ± 0.18	0.0063		3.78 ± 0.15	3.76 ± 0.15	0.6089		3.76 ± 0.15	3.77 ± 0.15	0.8895		n.a.	n.a.	n.a.		3.55 ± 0.19	3.61 ± 0.19	4.01 ± 0.18	3.91 ± 0.19	0.0725		3.97 ± 0.20	3.18 ± 0.19	4.33 ± 0.20	3.59 ± 0.19	0.6714		4.16 ± 0.17	3.40 ± 0.16	4.14 ± 0.17	3.37 ± 0.17	0.9021		0.9263	n.a.	0.0292	0.0957	n.a.	n.a.	n.a.	n.a.	<.0001
[truncated: 4 more columns]

## Sheet: TS6_UniFrac_Pval
TS6. Results of PERMANOVA models for unweighted (A) and weighed (B) UniFrac beta-diversity distances: p-values of the main factors (indiv. = focal individual; coh. = cohabitatnt), interactions and covariates included in the final models. The analyses, performd with adonis2 R function, were performed for all animals, and split by diet and individual's or cohabitant's line type. n.a. - not applicab…
	experimental goup				p-values
	diet	indiv.	coh.		diet	indiv. line type	coh. line type	sex	cage type	indiv. × coh. line type	indiv. line type × diet	coh. line type × diet	indiv. × coh. line type × diet	cage type × diet	litter size at weaning	mass at day 0	date	time at day 5
A) Results for unweighted UniFrac distances (comparison of community composition)
Both types of individuals and cohabitants
	both	both	both		0.0001	0.0001	0.044	0.0005	0.0403	0.3874	0.008	0.5781	0.7581	0.0009	0.0102	0.0001	0.0077	0.1194
	SD	both	both		n.a.	0.0001	0.1252	0.0665	0.02	0.3671	n.a.	n.a.	n.a.	n.a.	0.3223	0.0019	0.1195	0.0664
	LQD	both	both		n.a.	0.0001	0.2483	0.0017	0.0004	0.8765	n.a.	n.a.	n.a.	n.a.	0.0484	0.0355	0.0068	0.5357
Split by diet and individual's or cohabitant's line type
	SD	both	C		n.a.	0.0001	n.a.	0.05	0.0183	n.a.	n.a.	n.a.	n.a.	n.a.	0.568	0.0151	0.2456	0.061
	SD	both	H		n.a.	0.0001	n.a.	0.6111	0.6531	n.a.	n.a.	n.a.	n.a.	n.a.	0.0873	0.1132	0.5999	0.7545
	SD	C	both		n.a.	n.a.	0.1973	0.1988	0.6188	n.a.	n.a.	n.a.	n.a.	n.a.	0.159	0.0005	0.3629	0.3742
	SD	H	both		n.a.	n.a.	0.268	0.7431	0.0243	n.a.	n.a.	n.a.	n.a.	n.a.	0.1373	0.0273	0.2041	0.0204
	LQD	both	C		n.a.	0.0001	n.a.	0.0498	0.0045	n.a.	n.a.	n.a.	n.a.	n.a.	0.8873	0.6889	0.0758	0.0283
	LQD	both	H		n.a.	0.0001	n.a.	0.0231	0.0347	n.a.	n.a.	n.a.	n.a.	n.a.	0.0423	0.0867	0.0869	0.5568
	LQD	C	both		n.a.	n.a.	0.4071	0.0107	0.0007	n.a.	n.a.	n.a.	n.a.	n.a.	0.1189	0.0066	0.0442	0.0655
	LQD	H	both		n.a.	n.a.	0.706	0.0342	0.0055	n.a.	n.a.	n.a.	n.a.	n.a.	0.0368	0.0874	0.0182	0.0294
B) Results for weighted UniFrac distances (comaprison of community structure)
Both types of individuals and cohabitants
	both	both	both		0.0001	0.0001	0.6365	0.0392	0.0887	0.216	0.0011	0.9359	0.7161	0.0004	0.2713	0.068	0.0932	0.1219
	SD	both	both		n.a.	0.0001	0.8364	0.0287	0.0407	0.5781	n.a.	n.a.	n.a.	n.a.	0.2692	0.0172	0.2277	0.1454
	LQD	both	both		n.a.	0.0001	0.91	0.0385	0.0001	0.2851	n.a.	n.a.	n.a.	n.a.	0.7792	0.5059	0.0594	0.7454
Split by diet and individual's or cohabitant's line type
	SD	both	C		n.a.	0.001	n.a.	0.1982	0.0279	n.a.	n.a.	n.a.	n.a.	n.a.	0.0698	0.122	0.3754	0.1953
	SD	both	H		n.a.	0.0182	n.a.	0.1953	0.4171	n.a.	n.a.	n.a.	n.a.	n.a.	0.3683	0.1246	0.1872	0.5533
	SD	C	both		n.a.	n.a.	0.6156	0.1824	0.9419	n.a.	n.a.	n.a.	n.a.	n.a.	0.7296	0.0009	0.4462	0.9544
	SD	H	both		n.a.	n.a.	0.8194	0.0587	0.0114	n.a.	n.a.	n.a.	n.a.	n.a.	0.2886	0.4263	0.5993	0.0451
	LQD	both	C		n.a.	0.0046	n.a.	0.1252	0.0025	n.a.	n.a.	n.a.	n.a.	n.a.	0.8556	0.8647	0.4795	0.439
	LQD	both	H		n.a.	0.0022	n.a.	0.1971	0.0226	n.a.	n.a.	n.a.	n.a.	n.a.	0.78	0.3926	0.1597	0.8737
	LQD	C	both		n.a.	n.a.	0.5193	0.2984	0.0035	n.a.	n.a.	n.a.	n.a.	n.a.	0.7413	0.752	0.7856	0.4497
	LQD	H	both		n.a.	n.a.	0.5086	0.1006	0.0053	n.a.	n.a.	n.a.	n.a.	n.a.	0.8593	0.0962	0.0148	0.3198

## Sheet: TS7_Phylum_RelAbund_Pval
TS7. Prevalence, mean relative abundance, and results of a univariate nonparametric ANOVA of the relative abundance of 11 bacterial phyla (all with prevalence > 10%): p-values (adjusted for the test multiplicity) of the main factors (indiv. = focal individual; coh. = cohabitatnt), interactions and covariates included in the final models. The analyses, performed with adonis2 R function, were perfr…
	taxon analyzed		diet	prevalence (% indiv.)	mean abundance (%)		p-values
ITax	phylum						diet	indiv. line type	coh. line type	sex	cage type	indiv. × coh. line type	indiv. line type × diet	coh. line type × diet	cage type × diet	indiv. × coh. line type × diet	litter size at weaning	mass at day 0	date	time at day 5
1	Firmicutes		both	100	50.2128		0.211322	0.7549	0.94039	0.9536	0.4983	0.621989	0.27874	0.9271	0.85261	0.4752	0.8797	0.49577	0.495917	0.9191
1	Firmicutes		SD	100	49.8804		n.a.	0.46057	0.77858	0.828575	0.77462	0.8743	n.a.	n.a.	n.a.	n.a.	0.76615	0.692756	0.24365	0.822
1	Firmicutes		LQD	100	50.5301		n.a.	0.194517	0.9578	0.316983	0.63261	0.0583	n.a.	n.a.	n.a.	n.a.	0.97273	0.733578	0.79981	0.8765
2	Bacteroidota		both	100	27.0779		0.000157143	0.0341	0.94039	0.65428	0.05148	0.621989	0.6776	0.9271	0.139333	0.612071	0.8797	0.49577	0.582686	0.655443
2	Bacteroidota		SD	100	25.6922		n.a.	0.0711333	0.7903	0.828575	0.9815	0.8743	n.a.	n.a.	n.a.	n.a.	0.76615	0.34716	0.308367	0.337333
2	Bacteroidota		LQD	100	28.4008		n.a.	0.203343	0.9578	0.9132	0.0022	0.2805	n.a.	n.a.	n.a.	n.a.	0.978	0.728671	0.79981	0.8765
3	Desulfobacterota		both	100	9.04216		0.000157143	0.00055	0.9656	0.177375	0.005225	0.621989	0.555029	0.85646	0.0011	0.7906	0.8797	0.2805	0.854	0.9191
3	Desulfobacterota		SD	100	6.95142		n.a.	0.00165	0.77858	0.93225	0.77462	0.8743	n.a.	n.a.	n.a.	n.a.	0.95634	0.286733	0.414456	0.678425
3	Desulfobacterota		LQD	100	11.0381		n.a.	0.0979	0.9119	0.0858	0.0011	0.7733	n.a.	n.a.	n.a.	n.a.	0.97273	0.728017	0.749833	0.8765
4	Spirochaetota		both	96.6667	4.51985		0.000157143	0.167063	0.94039	0.850457	0.8848	0.621989	0.629062	0.9271	0.85261	0.612071	0.8797	0.49577	0.495917	0.7238
4	Spirochaetota		SD	97.3294	7.9261		n.a.	0.357622	0.77858	0.9031	0.9815	0.8743	n.a.	n.a.	n.a.	n.a.	0.76615	0.528157	0.3399	0.6974
4	Spirochaetota		LQD	96.034	1.26798		n.a.	0.1287	0.9119	0.740988	0.553789	0.7733	n.a.	n.a.	n.a.	n.a.	0.97273	0.72545	0.8311	0.8765
5	Campilobacterota		both	86.2319	2.95153		0.000157143	0.0474833	0.94039	0.9536	0.0044	0.621989	0.9392	0.9271	0.139333	0.7906	0.8797	0.35805	0.69641	0.655443
5	Campilobacterota		SD	82.1958	2.29899		n.a.	0.0799857	0.77858	0.9569	0.77462	0.8743	n.a.	n.a.	n.a.	n.a.	0.9846	0.286733	0.47366	0.822
5	Campilobacterota		LQD	90.085	3.57448		n.a.	0.21285	0.9578	0.9132	0.0022	0.7733	n.a.	n.a.	n.a.	n.a.	0.97273	0.733578	0.584925	0.8765
6	Proteobacteria		both	100	2.87132		0.000157143	0.00055	0.94039	0.9536	0.149417	0.8484	0.0011	0.9271	0.181775	0.7906	0.5863	0.2805	0.12045	0.402967
6	Proteobacteria		SD	100	3.49067		n.a.	0.0011	0.77858	0.9031	0.9815	0.8743	n.a.	n.a.	n.a.	n.a.	0.5885	0.34716	0.3399	0.33594
6	Proteobacteria		LQD	100	2.28004		n.a.	0.8614	0.9578	0.740988	0.01815	0.7733	n.a.	n.a.	n.a.	n.a.	0.97273	0.33165	0.472633	0.8765
7	Deferribacterota		both	93.7681	1.57695		0.26191	0.000733333	0.902	0.9536	0.668556	0.0803	0.27874	0.9271	0.769686	0.612071	0.8797	0.5194	0.6358	0.655443
7	Deferribacterota		SD	88.4273	1.50038		n.a.	0.0055	0.77858	0.828575	0.9815	0.8743	n.a.	n.a.	n.a.	n.a.	0.76615	0.90343	0.9213	0.33594
7	Deferribacterota		LQD	98.8669	1.65005		n.a.	0.194517	0.9119	0.1639	0.462687	0.0407	n.a.	n.a.	n.a.	n.a.	0.97273	0.728017	0.749833	0.8765
8	Verrucomicrobiota		both	93.7681	1.04153		0.000157143	0.215111	0.94039	0.850457	0.0044	0.621989	0.27874	0.85646	0.85261	0.612071	0.8797	0.40238	0.0077	0.402967
8	Verrucomicrobiota		SD	98.2196	1.62374		n.a.	0.7395	0.77858	0.9031	0.6941	0.8743	n.a.	n.a.	n.a.	n.a.	0.76615	0.692756	0.0341	0.33594
8	Verrucomicrobiota		LQD	89.5184	0.485712		n.a.	0.0022	0.9578	0.792611	0.0011	0.9519	n.a.	n.a.	n.a.	n.a.	0.97273	0.33165	0.472633	0.8765
9	Actinobacteriota		both	100	0.48104		0.10395	0.0341	0.94039	0.177375	0.62865	0.621989	0.00385	0.85646	0.71335	0.5753	0.8797	0.49577	0.377667	0.402967
9	Actinobacteriota		SD	100	0.433563		n.a.	0.00715	0.77858	0.7788	0.9815	0.8743	n.a.	n.a.	n.a.	n.a.	0.76615	0.528157	0.3399	0.3828
9	Actinobacteriota		LQD	100	0.526366		n.a.	0.194517	0.9119	0.1639	0.0182286	0.28424	n.a.	n.a.	n.a.	n.a.	0.2079	0.8459	0.472633	0.8041
10	Cyanobacteria		both	91.5942	0.188343		0.9277	0.0570429	0.902	0.177375	0.0044	0.621989	0.3696	0.85646	0.22506	0.612071	0.8797	0.35805	0.495917	0.655443
10	Cyanobacteria		SD	92.5816	0.1864		n.a.	0.03476	0.77858	0.9031	0.77462	0.8743	n.a.	n.a.	n.a.	n.a.	0.76615	0.286733	0.378557	0.33594
10	Cyanobacteria		LQD	90.6516	0.190198		n.a.	0.6314	0.9578	0.1562	0.0011	0.2805	n.a.	n.a.	n.a.	n.a.	0.97273	0.75911	0.79981	0.8765
11	Patescibacteria		both	81.4493	0.0365724		0.000157143	0.38643	0.902	0.177375	0.8848	0.8484	0.9392	0.5775	0.8648	0.7906	0.8797	0.49577	0.693611	0.706062
11	Patescibacteria		SD	70.0297	0.0161484		n.a.	0.197587	0.77858	0.9031	0.9815	0.8743	n.a.	n.a.	n.a.	n.a.	0.95634	0.9589	0.414456	0.33594
11	Patescibacteria		LQD	92.3513	0.0560707		n.a.	0.6314	0.9119	0.1562	0.8235	0.78188	n.a.	n.a.	n.a.	n.a.	0.97273	0.72545	0.79981	0.8765

## Sheet: TS8_Genus_RelAbund_Pval
TS8. Prevalence, mean relative abundance, and results of univariate nonparametric ANOVA of the relative abundance of 115 bacterial genera (all with prevalence >10%): p-values (adjusted for the test multiplicity) of the main factors (indiv. = focal individual; coh. = cohabitatnt), interactions and covariates included in the final models. The analyses, performed with adonis2 R function, were perfro…
	taxon analyzed		diet	prevalence (% indiv.)	mean abundance (%)		p-values
ITax	phylum; family; genus						diet	indiv. line type	coh. line type	sex	cage type	indiv. × coh. line type	indiv. line type × diet	coh. line type × diet	cage type × diet	indiv. × coh. line type × diet	litter size at weaning	mass at day 0	date	time at day 5
159	Firmicutes; Lachnospiraceae; Lachnospiraceae_NK4A136_group		both	100	8.29364		0.000151316	0.206521	0.755167	0.946693	0.170274	0.861289	0.886099	0.975157	0.0301875	0.937588	0.290375	0.9796	0.45655	0.859023
159			SD	100	7.15449		n.a.	0.579752	0.873817	0.9927	0.932981	0.96657	n.a.	n.a.	n.a.	n.a.	0.824507	0.934835	0.5123	0.924683
159			LQD	100	9.38115		n.a.	0.1936	0.9973	0.858542	0.0028	0.897902	n.a.	n.a.	n.a.	n.a.	0.40992	0.944486	0.851074	0.971373
160	Firmicutes; Lachnospiraceae; uncultured		both	100	4.43076		0.000151316	0.0442872	0.515583	0.795209	0.718505	0.861289	0.930648	0.896179	0.832842	0.952157	0.789547	0.462516	0.584895	0.957375
160			SD	100	3.01673		n.a.	0.109	0.688517	0.9927	0.987716	0.96657	n.a.	n.a.	n.a.	n.a.	0.9829	0.97733	0.887083	0.924683
160			LQD	100	5.7807		n.a.	0.1936	0.9973	0.858542	0.758124	0.897902	n.a.	n.a.	n.a.	n.a.	0.80006	0.60928	0.5642	0.808368
161	Firmicutes; Lachnospiraceae; __		both	100	2.34876		0.755445	0.927596	0.904833	0.844611	0.887927	0.914079	0.675195	0.975157	0.597403	0.952157	0.964357	0.976532	0.606846	0.859023
161			SD	100	2.36615		n.a.	0.834812	0.980842	0.9927	0.957156	0.96657	n.a.	n.a.	n.a.	n.a.	0.9829	0.97733	0.798062	0.924683
161			LQD	100	2.33216		n.a.	0.607246	0.9973	0.937362	0.479224	0.914849	n.a.	n.a.	n.a.	n.a.	0.9448	0.986205	0.70304	0.885733
162	Firmicutes; Lachnospiraceae; Roseburia		both	99.8551	2.3201		0.000151316	0.0147344	0.921136	0.841955	0.205647	0.930284	0.588463	0.975157	0.198636	0.952157	0.694768	0.9796	0.9851	0.393875
162			SD	100	1.43476		n.a.	0.104191	0.873817	0.962731	0.9943	0.96657	n.a.	n.a.	n.a.	n.a.	0.736918	0.97733	0.773016	0.924683
162			LQD	99.7167	3.16531		n.a.	0.0861241	0.9973	0.858542	0.105038	0.987013	n.a.	n.a.	n.a.	n.a.	0.9448	0.986205	0.76118	0.2772
163	Firmicutes; Lachnospiraceae; Lachnospiraceae_UCG-001		both	98.5507	1.54902		0.000151316	0.112484	0.755167	0.996768	0.624019	0.861289	0.331583	0.896179	0.246912	0.952157	0.789547	0.819453	0.0958333	0.88225
163			SD	97.6261	1.78709		n.a.	0.103385	0.862735	0.9927	0.796673	0.96657	n.a.	n.a.	n.a.	n.a.	0.7848	0.97733	0.0545	0.924683
163			LQD	99.4334	1.32174		n.a.	0.879034	0.9973	0.939093	0.105038	0.914849	n.a.	n.a.	n.a.	n.a.	0.9878	0.777	0.684465	0.777412
164	Firmicutes; Lachnospiraceae; Blautia		both	98.8406	0.690091		0.031125	0.0377093	0.755167	0.472894	0.588417	0.968875	0.52139	0.896179	0.112262	0.952157	0.789547	0.819453	0.05175	0.949082
164			SD	98.2196	0.7485		n.a.	0.0398414	0.788764	0.9927	0.132617	0.96657	n.a.	n.a.	n.a.	n.a.	0.824507	0.9904	0.12535	0.929194
164			LQD	99.4334	0.634329		n.a.	0.454947	0.9973	0.3542	0.487284	0.987013	n.a.	n.a.	n.a.	n.a.	0.950869	0.799273	0.415644	0.917583
165	Firmicutes; Lachnospiraceae; Lachnoclostridium		both	100	0.528265		0.000151316	0.3749	0.622769	0.472894	0.603074	0.861289	0.887041	0.896179	0.660523	0.935923	0.866512	0.957681	0.12765	0.6785
165			SD	100	0.251574		n.a.	0.117892	0.984464	0.946354	0.849884	0.96657	n.a.	n.a.	n.a.	n.a.	0.869124	0.934835	0.887083	0.495269
165			LQD	100	0.792416		n.a.	0.713813	0.807418	0.416985	0.642653	0.897902	n.a.	n.a.	n.a.	n.a.	0.9448	0.986205	0.2176	0.808368
166	Firmicutes; Lachnospiraceae; A2		both	93.4783	0.496509		0.000151316	0.221188	0.921136	0.841955	0.531706	0.861289	0.488131	0.975157	0.874455	0.952157	0.930766	0.86434	0.781142	0.5382
166			SD	87.8338	0.138395		n.a.	0.702304	0.991	0.9927	0.323367	0.96657	n.a.	n.a.	n.a.	n.a.	0.891252	0.97733	0.9661	0.559916
166			LQD	98.8669	0.838392		n.a.	0.24416	0.9973	0.73649	0.785061	0.897902	n.a.	n.a.	n.a.	n.a.	0.9448	0.944486	0.751474	0.3248
167	Firmicutes; Lachnospiraceae; [Eubacterium]_xylanophilum_group		both	97.3913	0.480445		0.000151316	0.059114	0.941426	0.813867	0.008625	0.914079	0.916714	0.975157	0.139917	0.952157	0.544923	0.376762	0.9851	0.6785
167			SD	97.3294	0.295529		n.a.	0.154727	0.984464	0.816859	0.796673	0.96657	n.a.	n.a.	n.a.	n.a.	0.32155	0.782983	0.745368	0.929194
167			LQD	97.4504	0.656979		n.a.	0.217574	0.9973	0.937362	0.0141474	0.944939	n.a.	n.a.	n.a.	n.a.	0.9448	0.69	0.812461	0.777412
168	Firmicutes; Lachnospiraceae; Lachnospiraceae_UCG-006		both	99.4203	0.414804		0.000151316	0.0369643	0.921136	0.718919	0.676731	0.861289	0.546889	0.975157	0.613102	0.952157	0.7045	0.9796	0.584895	0.516679
168			SD	98.8131	0.246287		n.a.	0.306431	0.984464	0.9927	0.796673	0.96657	n.a.	n.a.	n.a.	n.a.	0.860332	0.934835	0.520227	0.929194
168			LQD	100	0.575683		n.a.	0.09135	0.9973	0.752123	0.9791	0.897902	n.a.	n.a.	n.a.	n.a.	0.6144	0.940471	0.9874	0.2772
169	Firmicutes; Lachnospiraceae; Tyzzerella		both	97.1014	0.409301		0.000291139	0.800646	0.755167	0.598256	0.875736	0.9937	0.1058	0.975157	0.837943	0.952157	0.919233	0.462516	0.638647	0.859023
169			SD	96.7359	0.486946		n.a.	0.192292	0.893563	0.9927	0.978745	0.96657	n.a.	n.a.	n.a.	n.a.	0.944424	0.666503	0.798062	0.584785
169			LQD	97.4504	0.335176		n.a.	0.224711	0.991076	0.346338	0.901443	0.914849	n.a.	n.a.	n.a.	n.a.	0.971855	0.799273	0.812461	0.777412
170	Firmicutes; Lachnospiraceae; ASF356		both	86.9565	0.335533		0.000151316	0.412149	0.95231	0.115	0.588417	0.939495	0.550789	0.975157	0.597403	0.952157	0.594838	0.376762	0.380139	0.859023
170			SD	90.8012	0.47566		n.a.	0.999	0.984464	0.401743	0.9943	0.96657	n.a.	n.a.	n.a.	n.a.	0.736918	0.241782	0.774384	0.924683
170			LQD	83.2861	0.201756		n.a.	0.106831	0.9973	0.607926	0.1464	0.897902	n.a.	n.a.	n.a.	n.a.	0.9448	0.944486	0.2849	0.898594
171	Firmicutes; Lachnospiraceae; Coprococcus		both	22.1739	0.304942		0.000291139	0.151731	0.515583	0.775593	0.676731	0.861289	0.550789	0.896179	0.607316	0.937588	0.855711	0.904012	0.0983889	0.957375
171			SD	19.5846	0.469731		n.a.	0.325155	0.788764	0.962731	0.796673	0.96657	n.a.	n.a.	n.a.	n.a.	0.824507	0.97733	0.328817	0.993
171			LQD	24.6459	0.147622		n.a.	0.135353	0.991076	0.73649	0.64708	0.987013	n.a.	n.a.	n.a.	n.a.	0.6144	0.951325	0.684751	0.808368
172	Firmicutes; Lachnospiraceae; Acetatifactor		both	80.2899	0.258671		0.000151316	0.0495937	0.962864	0.830875	0.533929	0.28175	0.22242	0.896179	0.530278	0.935923	0.7045	0.752853	0.638647	0.6785
172			SD	72.997	0.128832		n.a.	0.702304	0.873817	0.9927	0.9943	0.96657	n.a.	n.a.	n.a.	n.a.	0.736918	0.97733	0.887083	0.993
172			LQD	87.2521	0.382624		n.a.	0.0942118	0.9973	0.858542	0.459019	0.2688	n.a.	n.a.	n.a.	n.a.	0.9448	0.777	0.641658	0.777412
173	Firmicutes; Lachnospiraceae; GCA-900066575		both	95.942	0.20374		0.000151316	0.420665	0.95231	0.660373	0.008625	0.861289	0.577506	0.896179	0.134034	0.935923	0.594838	0.9796	0.818647	0.859023
173			SD	91.9881	0.062761		n.a.	0.1744	0.980842	0.971593	0.796673	0.970403	n.a.	n.a.	n.a.	n.a.	0.824507	0.348255	0.798062	0.993
173			LQD	99.7167	0.338328		n.a.	0.908433	0.9973	0.576082	0.00430769	0.4592	n.a.	n.a.	n.a.	n.a.	0.921627	0.670982	0.901717	0.808368
174	Firmicutes; Lachnospiraceae; Lachnospiraceae_NK4B4_group		both	83.4783	0.151285		0.000151316	0.0617881	0.515583	0.941495	0.875327	0.914079	0.22242	0.896179	0.9979	0.969555	0.964357	0.677837	0.606846	0.6785
174			SD	72.4036	0.042048		n.a.	0.475297	0.662175	0.816859	0.978745	0.96657	n.a.	n.a.	n.a.	n.a.	0.944424	0.934835	0.745368	0.744688
174			LQD	94.051	0.25557		n.a.	0.106831	0.869292	0.9838	0.865813	0.942688	n.a.	n.a.	n.a.	n.a.	0.965835	0.799273	0.477867	0.784862
175	Firmicutes; Lachnospiraceae; Lachnospira		both	62.4638	0.0962051		0.000151316	0.059114	0.79901	0.841955	0.849965	0.861289	0.916714	0.896179	0.720203	0.979759	0.964357	0.957681	0.0983889	0.923755
175			SD	75.0742	0.146726		n.a.	0.336248	0.873817	0.9927	0.9943	0.96657	n.a.	n.a.	n.a.	n.a.	0.944424	0.9904	0.12535	0.929194
175			LQD	50.4249	0.0479745		n.a.	0.109867	0.9973	0.576082	0.658726	0.897902	n.a.	n.a.	n.a.	n.a.	0.971855	0.799273	0.70304	0.957091
176	Firmicutes; Lachnospiraceae; Tuzzerella		both	92.3188	0.0852251		0.000151316	0.535059	0.755167	0.472894	0.00191667	0.861289	0.888347	0.975157	0.00191667	0.935923	0.788539	0.376762	0.584895	0.575676
176			SD	87.5371	0.0395502		n.a.	0.507648	0.85674	0.895819	0.957156	0.96657	n.a.	n.a.	n.a.	n.a.	0.736918	0.182186	0.813475	0.924683
176			LQD	96.8839	0.12883		n.a.	0.681418	0.991076	0.33712	0.00112	0.897902	n.a.	n.a.	n.a.	n.a.	0.9448	0.777	0.625137	0.7175
177	Firmicutes; Lachnospiraceae; Lachnospiraceae_FCS020_group		both	89.1304	0.0820786		0.000151316	0.9975	0.921136	0.61701	0.122534	0.861289	0.973005	0.975157	0.134034	0.973977	0.594838	0.765863	0.976524	0.836107
177			SD	81.8991	0.0278584		n.a.	0.811885	0.984464	0.9927	0.987563	0.96657	n.a.	n.a.	n.a.	n.a.	0.824507	0.82136	0.637413	0.88508
177			LQD	96.034	0.133841		n.a.	0.962	0.9973	0.576082	0.0644966	0.914849	n.a.	n.a.	n.a.	n.a.	0.80006	0.777	0.751474	0.898594
178	Firmicutes; Lachnospiraceae; Acetitomaculum		both	73.0435	0.0550576		0.000425926	0.546862	0.841048	0.228083	0.52394	0.861289	0.1058	0.896179	0.597403	0.952157	0.924204	0.9796	0.45655	0.973566
178			SD	86.9436	0.0650169		n.a.	0.0310852	0.984464	0.946354	0.957156	0.96657	n.a.	n.a.	n.a.	n.a.	0.736918	0.97733	0.938587	0.495269
178			LQD	59.7734	0.0455497		n.a.	0.50483	0.991076	0.258844	0.445722	0.987013	n.a.	n.a.	n.a.	n.a.	0.623467	0.951325	0.371733	0.777412
179	Firmicutes; Lachnospiraceae; Oribacterium		both	65.0725	0.0434651		0.000151316	0.0174054	0.974	0.2599	0.52394	0.861289	0.119107	0.944364	0.597403	0.952157	0.391	0.568268	0.828947	0.795183
179			SD	43.6202	0.0140677		n.a.	0.712588	0.930719	0.816859	0.957156	0.96657	n.a.	n.a.	n.a.	n.a.	0.736918	0.348255	0.934675	0.929194
179			LQD	85.5524	0.0715301		n.a.	0.0392	0.9973	0.400278	0.459019	0.897902	n.a.	n.a.	n.a.	n.a.	0.649986	0.60928	0.76118	0.777412
180	Firmicutes; Lachnospiraceae; Lachnospiraceae_AC2044_group		both	70.1449	0.0220505		0.000151316	0.258013	0.962864	0.60525	0.588417	0.921117	0.52139	0.896179	0.345719	0.935923	0.789547	0.819453	0.606846	0.859023
180			SD	58.7537	0.0130649		n.a.	0.834812	0.930719	0.895819	0.428993	0.96657	n.a.	n.a.	n.a.	n.a.	0.860332	0.687274	0.637413	0.929194
180			LQD	81.0198	0.0306288		n.a.	0.204154	0.9973	0.835553	0.836528	0.897902	n.a.	n.a.	n.a.	n.a.	0.9448	0.986205	0.983147	0.898594
181	Firmicutes; Lachnospiraceae; [Ruminococcus]_gauvreauii_group		both	22.3188	0.0119008		0.0609255	0.0442872	0.841048	0.941495	0.397571	0.861289	0.535243	0.896179	0.874455	0.952157	0.964357	0.789367	0.0983889	0.836107
181			SD	20.7715	0.00881939		n.a.	0.39319	0.984464	0.962731	0.435319	0.96657	n.a.	n.a.	n.a.	n.a.	0.944424	0.97733	0.798062	0.924683
181			LQD	23.796	0.0148426		n.a.	0.109867	0.991076	0.9838	0.766885	0.914849	n.a.	n.a.	n.a.	n.a.	0.9448	0.777	0.2176	0.823554
182	Firmicutes; Lachnospiraceae; [Ruminococcus]_torques_group		both	32.4638	0.0111025		0.0012622	0.00766667	0.921136	0.472894	0.588417	0.884366	0.460359	0.749143	0.954186	0.952157	0.855711	0.9796	0.45655	0.890947
182			SD	28.7834	0.00763462		n.a.	0.149058	0.862735	0.816859	0.796673	0.998	n.a.	n.a.	n.a.	n.a.	0.736918	0.934835	0.848116	0.924683
182			LQD	35.9773	0.0144133		n.a.	0.0453333	0.991076	0.7158	0.785061	0.914849	n.a.	n.a.	n.a.	n.a.	0.971855	0.986205	0.625137	0.964741
184	Firmicutes; Lachnospiraceae; Eisenbergiella		both	49.4203	0.0099553		0.000151316	0.0155588	0.755167	0.648182	0.615872	0.914079	0.340818	0.975157	0.250043	0.952157	0.594838	0.568268	0.795636	0.6785
184			SD	27.003	0.00369992		n.a.	0.192292	0.930719	0.694875	0.796673	0.96657	n.a.	n.a.	n.a.	n.a.	0.9829	0.0218	0.798062	0.495269
184			LQD	70.8215	0.0159272		n.a.	0.09135	0.991076	0.868	0.3432	0.987013	n.a.	n.a.	n.a.	n.a.	0.649986	0.986205	0.641658	0.808368
186	Firmicutes; Lachnospiraceae; Lachnospiraceae_UCG-010		both	21.3043	0.00248554		0.029073	0.0397273	0.95231	0.88987	0.585925	0.883235	0.888347	0.975157	0.38887	0.952157	0.552426	0.462516	0.9851	0.859023
186			SD	26.7062	0.00302772		n.a.	0.1744	0.984464	0.9927	0.489592	0.96657	n.a.	n.a.	n.a.	n.a.	0.736918	0.2398	0.798062	0.993
186			LQD	16.1473	0.00196793		n.a.	0.217574	0.9973	0.904229	0.878566	0.897902	n.a.	n.a.	n.a.	n.a.	0.9448	0.944486	0.641658	0.808368
187	Firmicutes; Lachnospiraceae; [Eubacterium]_fissicatena_group		both	22.3188	0.00231322		0.000151316	0.004	0.95231	0.115	0.846005	0.914079	0.1058	0.896179	0.566739	0.952157	0.808725	0.919169	0.369353	0.6785
187			SD	13.9466	0.00109495		n.a.	0.366696	0.85674	0.401743	0.489592	0.96657	n.a.	n.a.	n.a.	n.a.	0.860332	0.934835	0.637413	0.924683
187			LQD	30.3116	0.00347627		n.a.	0.0168	0.9973	0.376533	0.836528	0.914849	n.a.	n.a.	n.a.	n.a.	0.80006	0.887345	0.509781	0.784862
196	Firmicutes; Oscillospiraceae; uncultured		both	100	3.63169		0.000151316	0.0129839	0.938994	0.568675	0.217289	0.861289	0.888347	0.975157	0.0105417	0.935923	0.964357	0.9796	0.4163	0.9798
196			SD	100	2.76767		n.a.	0.103385	0.930719	0.503217	0.607493	0.96657	n.a.	n.a.	n.a.	n.a.	0.9829	0.966467	0.505487	0.924683
196			LQD	100	4.45655		n.a.	0.1024	0.9973	0.858542	0.0056	0.897902	n.a.	n.a.	n.a.	n.a.	0.9448	0.986205	0.886468	0.818496
197	Firmicutes; Oscillospiraceae; Colidextribacter		both	100	0.651082		0.000151316	0.56526	0.941426	0.868428	0.205647	0.896689	0.928462	0.896179	0.274037	0.952157	0.831108	0.92219	0.45655	0.795183
197			SD	100	0.293472		n.a.	0.595581	0.984464	0.9927	0.957156	0.96657	n.a.	n.a.	n.a.	n.a.	0.886484	0.934835	0.774384	0.929194
197			LQD	100	0.992483		n.a.	0.908433	0.991076	0.939093	0.168764	0.91921	n.a.	n.a.	n.a.	n.a.	0.80006	0.986205	0.261046	0.777412
198	Firmicutes; Oscillospiraceae; Oscillibacter		both	100	0.56281		0.000151316	0.030475	0.904833	0.115	0.0186875	0.861289	0.688693	0.896179	0.133208	0.998	0.789547	0.957681	0.781142	0.836107
198			SD	100	0.446674		n.a.	0.405636	0.873817	0.503217	0.9156	0.96657	n.a.	n.a.	n.a.	n.a.	0.9829	0.674866	0.887083	0.993
198			LQD	100	0.673682		n.a.	0.0750815	0.9973	0.258844	0.0028	0.897902	n.a.	n.a.	n.a.	n.a.	0.649986	0.799273	0.371733	0.777412
199	Firmicutes; Oscillospiraceae; UCG-005		both	96.5217	0.307713		0.434958	0.478703	0.904833	0.472894	0.212586	0.861289	0.84366	0.975157	0.119	0.952157	0.855711	0.88777	0.0983889	0.859023
199			SD	95.2522	0.300481		n.a.	0.500434	0.930719	0.503217	0.978745	0.96657	n.a.	n.a.	n.a.	n.a.	0.891252	0.348255	0.813475	0.993
199			LQD	97.7337	0.314616		n.a.	0.850295	0.9973	0.904229	0.033113	0.987013	n.a.	n.a.	n.a.	n.a.	0.9448	0.777	0.0784	0.808368
200	Firmicutes; Oscillospiraceae; UCG-003		both	99.7101	0.214349		0.210335	0.00071875	0.904833	0.457946	0.588417	0.914079	0.909617	0.896179	0.085675	0.935923	0.544923	0.950799	0.976524	0.890394
200			SD	99.7033	0.207675		n.a.	0.000990909	0.930719	0.962731	0.796673	0.96657	n.a.	n.a.	n.a.	n.a.	0.975323	0.9904	0.813475	0.924683
200			LQD	99.7167	0.22072		n.a.	0.0014	0.8696	0.376533	0.062637	0.897902	n.a.	n.a.	n.a.	n.a.	0.5296	0.871476	0.831926	0.962877
201	Firmicutes; Oscillospiraceae; NK4A214_group		both	97.5362	0.179144		0.000151316	0.5115	0.904833	0.457946	0.117054	0.861289	0.277408	0.975157	0.34822	0.935923	0.367115	0.819453	0.921139	0.859023
201			SD	96.1424	0.0715741		n.a.	0.304461	0.984464	0.632774	0.796673	0.96657	n.a.	n.a.	n.a.	n.a.	0.860332	0.9904	0.940926	0.929194
201			LQD	98.8669	0.281837		n.a.	0.378909	0.9973	0.3472	0.124062	0.897902	n.a.	n.a.	n.a.	n.a.	0.6144	0.887345	0.958562	0.823554
202	Firmicutes; Oscillospiraceae; __		both	77.8261	0.0340441		0.000151316	0.01265	0.921136	0.691238	0.71436	0.861289	0.257312	0.896179	0.266564	0.952157	0.290375	0.44574	0.584895	0.836107
202			SD	64.095	0.0191466		n.a.	0.702304	0.984464	0.971593	0.849884	0.96657	n.a.	n.a.	n.a.	n.a.	0.608843	0.921857	0.637413	0.993
202			LQD	90.9348	0.0482663		n.a.	0.0129231	0.991076	0.858542	0.280878	0.914849	n.a.	n.a.	n.a.	n.a.	0.6144	0.69	0.886468	0.808368
203	Firmicutes; Oscillospiraceae; UCG-002		both	33.6232	0.0326473		0.0245682	0.01725	0.515583	0.92327	0.511878	0.987839	0.588463	0.896179	0.939273	0.952157	0.544923	0.376762	0.9851	0.859023
203			SD	34.1246	0.0237344		n.a.	0.176402	0.873817	0.9927	0.713071	0.96657	n.a.	n.a.	n.a.	n.a.	0.824507	0.97733	0.774384	0.925007
203			LQD	33.1445	0.0411562		n.a.	0.0942118	0.79296	0.904229	0.685932	0.987013	n.a.	n.a.	n.a.	n.a.	0.66885	0.60928	0.755782	0.898594
204	Firmicutes; Oscillospiraceae; UCG-007		both	17.3913	0.00244349		0.000151316	0.059114	0.515583	0.457946	0.615872	0.861289	0.168886	0.705333	0.552333	0.952157	0.988092	0.765863	0.45655	0.859023
204			SD	0.296736	2.05774e-05		NA	NA	NA	NA	NA	NA	NA	NA	NA	NA	NA	NA	NA	NA
204			LQD	33.711	0.00475657		n.a.	0.106831	0.668267	0.398618	0.549099	0.897902	n.a.	n.a.	n.a.	n.a.	0.971855	0.887345	0.415644	0.808368
205	Firmicutes; Oscillospiraceae; Flavonifractor		both	21.1594	0.00227192		0.000425926	0.865972	0.904833	0.718919	0.676731	0.861289	0.9997	0.975157	0.119	0.952157	0.789547	0.568268	0.519471	0.398187
205			SD	16.6172	0.00153059		n.a.	0.834812	0.873817	0.816859	0.484505	0.96657	n.a.	n.a.	n.a.	n.a.	0.846721	0.97733	0.824007	0.924683
205			LQD	25.4958	0.00297965		n.a.	0.908433	0.9973	0.904229	0.18754	0.897902	n.a.	n.a.	n.a.	n.a.	0.649986	0.685176	0.641658	0.4144
207	Firmicutes; Ruminococcaceae; uncultured		both	100	2.32366		0.000151316	0.035622	0.904833	0.598256	0.9793	0.9937	0.170014	0.896179	0.874455	0.952157	0.924204	0.9796	0.82561	0.803663
207			SD	100	1.73064		n.a.	0.764124	0.984464	0.893534	0.978745	0.96657	n.a.	n.a.	n.a.	n.a.	0.736918	0.97733	0.505487	0.929194
207			LQD	100	2.88979		n.a.	0.0400842	0.991076	0.83789	0.912281	0.987013	n.a.	n.a.	n.a.	n.a.	0.9448	0.986205	0.261046	0.808368
208	Firmicutes; Ruminococcaceae; Ruminococcus		both	77.2464	0.837614		0.000151316	0.002875	0.904833	0.718919	0.142217	0.914079	0.22242	0.990816	0.552333	0.952157	0.855711	0.498333	0.573757	0.86629
208			SD	78.635	0.591759		n.a.	0.1744	0.930719	0.895819	0.796673	0.96657	n.a.	n.a.	n.a.	n.a.	0.736918	0.666503	0.774384	0.896112
208			LQD	75.9207	1.07233		n.a.	0.0171733	0.9973	0.858542	0.1946	0.914849	n.a.	n.a.	n.a.	n.a.	0.9448	0.777	0.660996	0.808368
209	Firmicutes; Ruminococcaceae; Incertae_Sedis		both	100	0.642932		0.000151316	0.433124	0.938994	0.656711	0.676731	0.861289	0.420787	0.975157	0.266564	0.952157	0.7045	0.9796	0.630618	0.957375
209			SD	100	0.450957		n.a.	0.79659	0.984464	0.9927	0.796673	0.96657	n.a.	n.a.	n.a.	n.a.	0.956205	0.97733	0.637413	0.94842
209			LQD	100	0.826206		n.a.	0.335054	0.9973	0.800121	0.300975	0.914849	n.a.	n.a.	n.a.	n.a.	0.742594	0.986205	0.893406	0.898594
210	Firmicutes; Ruminococcaceae; [Eubacterium]_siraeum_group		both	91.0145	0.634286		0.0210172	0.00903571	0.904833	0.866415	0.81251	0.861289	0.674488	0.896179	0.954186	0.952157	0.923918	0.376762	0.584895	0.957375
210			SD	87.8338	0.552425		n.a.	0.0454167	0.893563	0.962731	0.978745	0.96657	n.a.	n.a.	n.a.	n.a.	0.908333	0.420429	0.934675	0.924683
210			LQD	94.051	0.712436		n.a.	0.1232	0.9973	0.9838	0.84538	0.914849	n.a.	n.a.	n.a.	n.a.	0.971855	0.887345	0.261046	0.777412
211	Firmicutes; Ruminococcaceae; UBA1819		both	99.1304	0.43276		0.000151316	0.865972	0.95231	0.539147	0.43486	0.914079	0.457079	0.896179	0.597403	0.937588	0.965675	0.9796	0.630618	0.393875
211			SD	98.2196	0.291919		n.a.	0.576532	0.873817	0.70305	0.932981	0.96657	n.a.	n.a.	n.a.	n.a.	0.9829	0.97733	0.887083	0.924683
211			LQD	100	0.567216		n.a.	0.554933	0.9973	0.858542	0.347396	0.914849	n.a.	n.a.	n.a.	n.a.	0.9448	0.986205	0.415644	0.2772
212	Firmicutes; Ruminococcaceae; Fournierella		both	81.3043	0.282825		0.281917	0.00071875	0.941426	0.661058	0.533929	0.914079	0.148781	0.9979	0.295167	0.952157	0.789547	0.579381	0.298233	0.944708
212			SD	76.2611	0.301154		n.a.	0.000990909	0.984464	0.9927	0.428993	0.96657	n.a.	n.a.	n.a.	n.a.	0.944424	0.348255	0.791473	0.924683
212			LQD	86.119	0.265327		n.a.	0.106831	0.9973	0.7158	0.836528	0.897902	n.a.	n.a.	n.a.	n.a.	0.6144	0.986205	0.261046	0.784862
213	Firmicutes; Ruminococcaceae; Ruminococcaceae		both	70.5797	0.125615		0.000151316	0.293032	0.946675	0.115	0.97021	0.874	0.187163	0.944364	0.609788	0.969555	0.290375	0.9796	0.419227	0.725545
213			SD	70.0297	0.0817326		n.a.	0.491208	0.873817	0.895819	0.796673	0.96657	n.a.	n.a.	n.a.	n.a.	0.860332	0.97733	0.637413	0.967805
213			LQD	71.1048	0.167508		n.a.	0.178769	0.9973	0.258844	0.758124	0.942688	n.a.	n.a.	n.a.	n.a.	0.1176	0.986205	0.2176	0.777412
214	Firmicutes; Ruminococcaceae; __		both	85.6522	0.0428775		0.000151316	0.00071875	0.515583	0.618069	0.0805	0.914079	0.00164286	0.5842	0.478017	0.937588	0.7045	0.376762	0.45655	0.751333
214			SD	75.6677	0.0204847		n.a.	0.438538	0.984464	0.503217	0.796673	0.96657	n.a.	n.a.	n.a.	n.a.	0.9829	0.676389	0.576023	0.924683
214			LQD	95.1841	0.0642554		n.a.	0.0014	0.3696	0.9838	0.105038	0.897902	n.a.	n.a.	n.a.	n.a.	0.80006	0.69	0.660996	0.4144
215	Firmicutes; Ruminococcaceae; Paludicola		both	44.6377	0.00609563		0.162056	0.866154	0.946675	0.560081	0.533929	0.861289	0.0544737	0.975157	0.832842	0.935923	0.7045	0.438437	0.0983889	0.894155
215			SD	43.0267	0.00558582		n.a.	0.192292	0.930719	0.893534	0.849884	0.96657	n.a.	n.a.	n.a.	n.a.	0.944424	0.853537	0.637413	0.734387
215			LQD	46.1756	0.00658234		n.a.	0.137433	0.9973	0.705152	0.580821	0.921916	n.a.	n.a.	n.a.	n.a.	0.6144	0.685176	0.261046	0.808368
216	Firmicutes; Ruminococcaceae; Anaerofilum		both	29.2754	0.00470569		0.000151316	0.0442872	0.755167	0.946693	0.114574	0.883235	0.148781	0.896179	0.274037	0.937588	0.971374	0.673469	0.419227	0.689629
216			SD	14.5401	0.00127085		n.a.	0.637892	0.984464	0.878884	0.796673	0.96657	n.a.	n.a.	n.a.	n.a.	0.736918	0.448263	0.887083	0.993
216			LQD	43.3428	0.00798484		n.a.	0.0784	0.991076	0.9838	0.105038	0.897902	n.a.	n.a.	n.a.	n.a.	0.9448	0.944486	0.415644	0.777412
217	Firmicutes; Ruminococcaceae; Anaerotruncus		both	34.3478	0.00435233		0.000151316	0.0565612	0.515583	0.722	0.33465	0.861289	0.633041	0.896179	0.977298	0.952157	0.808725	0.20125	0.877286	0.836107
217			SD	18.3976	0.00181104		n.a.	0.1744	0.984464	0.962731	0.484505	0.96657	n.a.	n.a.	n.a.	n.a.	0.860332	0.182186	0.763934	0.964768
217			LQD	49.5751	0.00677844		n.a.	0.1936	0.79296	0.804227	0.544658	0.914849	n.a.	n.a.	n.a.	n.a.	0.80006	0.69	0.9874	0.808368
219	Firmicutes; Butyricicoccaceae; Butyricicoccus		both	94.2029	0.125907		0.111562	0.207315	0.755167	0.046	0.85897	0.884366	0.18459	0.975157	0.429737	0.935923	0.797619	0.20125	0.831076	0.795183
219			SD	94.9555	0.11804		n.a.	0.0222542	0.873817	0.503217	0.522421	0.96657	n.a.	n.a.	n.a.	n.a.	0.9829	0.448263	0.934675	0.924683
219			LQD	93.4844	0.133417		n.a.	0.898501	0.991076	0.186667	0.698448	0.897902	n.a.	n.a.	n.a.	n.a.	0.80006	0.685176	0.812461	0.808368
220	Firmicutes; Butyricicoccaceae; UCG-009		both	95.7971	0.122707		0.000151316	0.935774	0.904833	0.284944	0.00191667	0.861289	0.368411	0.990816	0.291244	0.952157	0.594838	0.376762	0.781142	0.859023
220			SD	93.7685	0.0740301		n.a.	0.192292	0.873817	0.401743	0.341533	0.96657	n.a.	n.a.	n.a.	n.a.	0.83063	0.968854	0.934675	0.924683
220			LQD	97.7337	0.169177		n.a.	0.589302	0.9973	0.658057	0.0056	0.897902	n.a.	n.a.	n.a.	n.a.	0.80006	0.60928	0.641658	0.962761
221	Firmicutes; [Eubacterium]_coprostanoligenes_group; [Eubacterium]_coprostanoligenes_group		both	68.8406	0.0660359		0.000151316	0.0149848	0.755167	0.643361	0.9793	0.861289	0.988593	0.975157	0.95604	0.952157	0.290375	0.21965	0.818647	0.894155
221			SD	59.3472	0.0342168		n.a.	0.00401579	0.873817	0.70305	0.9943	0.96657	n.a.	n.a.	n.a.	n.a.	0.824507	0.934835	0.5123	0.896112
221			LQD	77.9037	0.0964128		n.a.	0.1936	0.991076	0.858542	0.951899	0.914849	n.a.	n.a.	n.a.	n.a.	0.1176	0.3808	0.971708	0.964741
222	Firmicutes; UCG-010; UCG-010		both	65.942	0.0325431		0.349091	0.563979	0.974	0.868428	0.008625	0.861289	0.398283	0.896179	0.5543	0.952157	0.594838	0.957681	0.869687	0.516679
222			SD	63.5015	0.0311676		n.a.	0.304655	0.873817	0.503217	0.435319	0.96657	n.a.	n.a.	n.a.	n.a.	0.834213	0.870504	0.745368	0.547422
222			LQD	68.272	0.0338563		n.a.	0.850295	0.991076	0.658057	0.0196	0.921916	n.a.	n.a.	n.a.	n.a.	0.1176	0.799273	0.4164	0.784862
224	Firmicutes; __; __		both	19.4203	0.00205434		0.000151316	0.00071875	0.755167	0.810386	0.190109	0.861289	0.257312	0.896179	0.529556	0.952157	0.988092	0.904012	0.9851	0.881922
224			SD	10.089	0.000757657		n.a.	0.010381	0.924538	0.9927	0.796673	0.96657	n.a.	n.a.	n.a.	n.a.	0.944424	0.9904	0.887083	0.967805
224			LQD	28.3286	0.00329224		n.a.	0.0129231	0.991076	0.858542	0.252571	0.897902	n.a.	n.a.	n.a.	n.a.	0.9448	0.944486	0.886468	0.808368
226	Firmicutes; Christensenellaceae; uncultured		both	83.4783	2.28488		0.000151316	0.0585849	0.755167	0.875394	0.863951	0.914079	0.157279	0.896179	0.937029	0.952157	0.544923	0.9796	0.766918	0.836107
226			SD	85.7567	4.12386		n.a.	0.109	0.873817	0.9927	0.987716	0.96657	n.a.	n.a.	n.a.	n.a.	0.736918	0.97733	0.774384	0.924683
226			LQD	81.3031	0.529255		n.a.	0.812953	0.9973	0.5712	0.49328	0.914849	n.a.	n.a.	n.a.	n.a.	0.80006	0.986205	0.641658	0.808368
227	Firmicutes; Christensenellaceae; __		both	85.2174	2.24722		0.000151316	0.146015	0.755167	0.228083	0.0490263	0.861289	0.820333	0.984027	0.698399	0.935923	0.415353	0.462516	0.869106	0.859023
227			SD	83.3828	3.11375		n.a.	0.325155	0.930719	0.503217	0.484505	0.96657	n.a.	n.a.	n.a.	n.a.	0.860332	0.348255	0.950459	0.967805
227			LQD	86.9688	1.41996		n.a.	0.335054	0.991076	0.607926	0.114947	0.897902	n.a.	n.a.	n.a.	n.a.	0.5296	0.986205	0.76118	0.808368
228	Firmicutes; Christensenellaceae; Christensenella		both	35.942	0.00440311		0.0377151	0.002875	0.515583	0.795209	0.52394	0.861289	0.52139	0.896179	0.262635	0.952157	0.594838	0.896701	0.834795	0.859023
228			SD	31.1573	0.00377633		n.a.	0.1744	0.688517	0.895819	0.341533	0.96657	n.a.	n.a.	n.a.	n.a.	0.2943	0.97733	0.887083	0.993
228			LQD	40.5099	0.00500149		n.a.	0.00871111	0.991076	0.416985	0.822733	0.914849	n.a.	n.a.	n.a.	n.a.	0.80006	0.959127	0.70304	0.823554
230	Firmicutes; Clostridia_vadinBB60_group; Clostridia_vadinBB60_group		both	100	2.47932		0.000151316	0.924579	0.962864	0.619231	0.887927	0.883235	0.381449	0.896179	0.0212308	0.937588	0.952153	0.642	0.976524	0.686714
230			SD	100	2.07845		n.a.	0.507648	0.980842	0.9927	0.341533	0.96657	n.a.	n.a.	n.a.	n.a.	0.944424	0.97733	0.637413	0.495269
230			LQD	100	2.86202		n.a.	0.48538	0.991076	0.4536	0.0970667	0.897902	n.a.	n.a.	n.a.	n.a.	0.80006	0.69	0.2849	0.971373
231	Firmicutes; Peptococcaceae; uncultured		both	93.6232	0.465774		0.000151316	0.21068	0.708893	0.618069	0.863951	0.9937	0.173408	0.896179	0.939273	0.952157	0.290375	0.431	0.369353	0.516679
231			SD	95.549	0.789112		n.a.	0.224812	0.862735	0.816859	0.987716	0.96657	n.a.	n.a.	n.a.	n.a.	0.475967	0.475159	0.574975	0.495269
231			LQD	91.7847	0.157092		n.a.	0.220206	0.9973	0.858542	0.281292	0.914849	n.a.	n.a.	n.a.	n.a.	0.965835	0.887345	0.751595	0.7175
232	Firmicutes; Peptococcaceae; Peptococcus		both	95.0725	0.107553		0.241045	0.206521	0.841048	0.2599	0.00191667	0.861289	0.187927	0.508875	0.00191667	0.935923	0.797619	0.677837	0.976524	0.86629
232			SD	97.3294	0.104225		n.a.	0.0310852	0.873817	0.816859	0.986568	0.96657	n.a.	n.a.	n.a.	n.a.	0.860332	0.97733	0.654436	0.924683
232			LQD	92.9178	0.110731		n.a.	0.879034	0.668267	0.376533	0.00112	0.80416	n.a.	n.a.	n.a.	n.a.	0.9448	0.69	0.3248	0.849956
233	Firmicutes; Anaerovoracaceae; Family_XIII_UCG-001		both	86.5217	0.0756518		0.000151316	0.447989	0.515583	0.799325	0.0432941	0.884366	0.550789	0.896179	0.0594167	0.952157	0.988092	0.462516	0.795768	0.516679
233			SD	80.7122	0.0257894		n.a.	0.880741	0.5232	0.962731	0.9943	0.96657	n.a.	n.a.	n.a.	n.a.	0.860332	0.657165	0.9661	0.547422
233			LQD	92.068	0.123254		n.a.	0.368238	0.79296	0.858542	0.0254545	0.914849	n.a.	n.a.	n.a.	n.a.	0.971855	0.777	0.70304	0.777412
234	Firmicutes; Anaerovoracaceae; [Eubacterium]_brachy_group		both	95.6522	0.067052		0.000151316	0.933591	0.904833	0.02875	0.00191667	0.91876	0.156121	0.975157	0.00328571	0.952157	0.988092	0.789367	0.781142	0.949082
234			SD	93.4718	0.03572		n.a.	0.0184826	0.894264	0.895819	0.81339	0.96657	n.a.	n.a.	n.a.	n.a.	0.736918	0.97733	0.894769	0.924683
234			LQD	97.7337	0.0969639		n.a.	0.358247	0.9973	0.0672	0.00112	0.9632	n.a.	n.a.	n.a.	n.a.	0.9448	0.799273	0.755782	0.964741
235	Firmicutes; Anaerovoracaceae; Family_XIII_AD3011_group		both	77.8261	0.0396454		0.000151316	0.00071875	0.809694	0.798493	0.875736	0.861289	0.00805	0.508875	0.832842	0.937588	0.789547	0.134167	0.606846	0.973566
235			SD	64.3917	0.0151843		n.a.	0.276822	0.5232	0.503217	0.932981	0.96657	n.a.	n.a.	n.a.	n.a.	0.9829	0.16786	0.745368	0.924683
235			LQD	90.6516	0.0629978		n.a.	0.0014	0.668267	0.58632	0.766885	0.897902	n.a.	n.a.	n.a.	n.a.	0.9448	0.60928	0.641658	0.898594
236	Firmicutes; Anaerovoracaceae; __		both	23.6232	0.00502402		0.000151316	0.00991379	0.515583	0.563205	0.114574	0.9937	0.122931	0.508875	0.496951	0.99246	0.855711	0.9796	0.804055	0.859023
236			SD	8.60534	0.000914999		NA	NA	NA	NA	NA	NA	NA	NA	NA	NA	NA	NA	NA	NA
236			LQD	37.9603	0.0089468		n.a.	0.0453333	0.668267	0.658057	0.18754	0.987013	n.a.	n.a.	n.a.	n.a.	0.9448	0.986205	0.812461	0.808368
237	Firmicutes; Anaerovoracaceae; Anaerovorax		both	22.6087	0.00224834		0.879801	0.961662	0.968279	0.643361	0.371085	0.914079	0.170014	0.975157	0.349284	0.952157	0.559804	0.9796	0.828947	0.855954
237			SD	25.2226	0.00228279		n.a.	0.270779	0.984464	0.9927	0.9943	0.96657	n.a.	n.a.	n.a.	n.a.	0.846721	0.921857	0.791473	0.969759
237			LQD	20.1133	0.00221546		n.a.	0.357467	0.9973	0.431407	0.1302	0.914849	n.a.	n.a.	n.a.	n.a.	0.80006	0.951325	0.971708	0.808368
240	Firmicutes; Monoglobaceae; Monoglobus		both	32.8986	0.186232		0.000151316	0.0069	0.938994	0.691238	0.538941	0.960841	0.06325	0.975157	0.291244	0.952157	0.594838	0.728132	0.81998	0.772054
240			SD	18.9911	0.0374858		n.a.	0.496369	0.980842	0.9927	0.796673	0.96657	n.a.	n.a.	n.a.	n.a.	0.860332	0.348255	0.943115	0.993
240			LQD	46.1756	0.328236		n.a.	0.021	0.9973	0.728	0.300326	0.988	n.a.	n.a.	n.a.	n.a.	0.623467	0.69	0.751595	0.784862
241	Firmicutes; __; __		both	87.2464	0.0536834		0.00374096	0.296125	0.974	0.457946	0.114574	0.884366	0.27968	0.975157	0.00766667	0.952157	0.290375	0.620739	0.606846	0.839317
241			SD	79.822	0.0463141		n.a.	0.211658	0.984464	0.878884	0.0218	0.96657	n.a.	n.a.	n.a.	n.a.	0.32155	0.475159	0.934675	0.754522
241			LQD	94.3343	0.0607187		n.a.	0.908433	0.9973	0.607926	0.509756	0.9632	n.a.	n.a.	n.a.	n.a.	0.9448	0.986205	0.641658	0.964679
242	Firmicutes; Clostridia_UCG-014; Clostridia_UCG-014		both	81.8841	0.0489002		0.179934	0.0757869	0.755167	0.868428	0.603074	0.861289	0.454806	0.975157	0.0104545	0.952157	0.594838	0.819453	0.95123	0.887355
242			SD	80.4154	0.0451252		n.a.	0.514533	0.862735	0.503217	0.213329	0.96657	n.a.	n.a.	n.a.	n.a.	0.975323	0.97733	0.328817	0.94842
242			LQD	83.2861	0.0525041		n.a.	0.11872	0.991076	0.858542	0.038976	0.914849	n.a.	n.a.	n.a.	n.a.	0.649986	0.777	0.641658	0.924404
243	Firmicutes; Clostridiaceae; Candidatus_Arthromitus		both	14.7826	0.0534368		0.000151316	0.56526	0.938994	0.660373	0.0875	0.914079	0.886099	0.975157	0.175734	0.952157	0.822959	0.728132	0.9851	0.705453
243			SD	2.67062	0.0022043		NA	NA	NA	NA	NA	NA	NA	NA	NA	NA	NA	NA	NA	NA
243			LQD	26.3456	0.102347		n.a.	0.713813	0.9973	0.7158	0.0784	0.9632	n.a.	n.a.	n.a.	n.a.	0.921627	0.799273	0.9874	0.777412
245	Firmicutes; Anaerofustaceae; Anaerofustis		both	11.7391	0.0011016		0.000291139	0.745564	0.755167	0.560081	0.0875	0.914079	0.535243	0.975157	0.259708	0.937588	0.544923	0.568268	0.298233	0.836107
245			SD	7.4184	0.000609434		NA	NA	NA	NA	NA	NA	NA	NA	NA	NA	NA	NA	NA	NA
245			LQD	15.864	0.00157146		n.a.	0.850295	0.9973	0.658057	0.0644966	0.897902	n.a.	n.a.	n.a.	n.a.	0.80006	0.69	0.2176	0.808368
247	Firmicutes; Lactobacillaceae; Lactobacillus		both	95.2174	5.02719		0.000151316	0.00071875	0.755167	0.0115	0.676731	0.884366	0.00940909	0.896179	0.552333	0.952157	0.964357	0.117875	0.584895	0.184
247			SD	100	8.50882		n.a.	0.000990909	0.85674	0.0109	0.796673	0.96657	n.a.	n.a.	n.a.	n.a.	0.860332	0.0981	0.773016	0.4905
247			LQD	90.6516	1.70337		n.a.	0.0014	0.991076	0.571859	0.84538	0.944939	n.a.	n.a.	n.a.	n.a.	0.888465	0.986205	0.971708	0.463867
248	Firmicutes; Streptococcaceae; Streptococcus		both	55.7971	0.0120648		0.000151316	0.935774	0.755167	0.284944	0.676731	0.861289	0.930648	0.975157	0.0246429	0.952157	0.76958	0.904012	0.869106	0.881922
248			SD	43.0267	0.00565195		n.a.	0.937703	0.788764	0.9927	0.0218	0.96657	n.a.	n.a.	n.a.	n.a.	0.736918	0.9904	0.93213	0.929194
248			LQD	67.9887	0.018187		n.a.	0.908433	0.9973	0.258844	0.169742	0.914849	n.a.	n.a.	n.a.	n.a.	0.9448	0.944486	0.851074	0.898594
254	Firmicutes; Erysipelotrichaceae; Ileibacterium		both	18.1159	0.631533		0.000151316	0.00071875	0.941426	0.691238	0.623506	0.914079	0.00164286	0.975157	0.638661	0.952157	0.561914	0.620739	0.869106	0.795183
254			SD	31.7507	1.28037		n.a.	0.000990909	0.984464	0.895819	0.81339	0.96657	n.a.	n.a.	n.a.	n.a.	0.736918	0.676389	0.887083	0.88508
254			LQD	5.09915	0.0121029		NA	NA	NA	NA	NA	NA	NA	NA	NA	NA	NA	NA	NA	NA
255	Firmicutes; Erysipelotrichaceae; __		both	10.2899	0.578724		0.000151316	0.00071875	0.755167	0.866415	0.624019	0.861289	0.00164286	0.896179	0.698399	0.937588	0.812028	0.117875	0.801806	0.840219
255			SD	14.5401	1.17644		n.a.	0.000990909	0.873817	0.9927	0.849884	0.96657	n.a.	n.a.	n.a.	n.a.	0.860332	0.10355	0.820803	0.924683
255			LQD	6.23229	0.00809594		NA	NA	NA	NA	NA	NA	NA	NA	NA	NA	NA	NA	NA	NA
256	Firmicutes; Erysipelotrichaceae; uncultured		both	27.3913	0.167154		0.000151316	0.00071875	0.755167	0.813867	0.615872	0.861289	0.00164286	0.896179	0.613102	0.937588	0.855711	0.117875	0.828947	0.859023
256			SD	28.4866	0.333742		n.a.	0.000990909	0.873817	0.9927	0.81339	0.96657	n.a.	n.a.	n.a.	n.a.	0.891252	0.10355	0.887083	0.924683
256			LQD	26.3456	0.00811697		n.a.	0.245397	0.9973	0.5712	0.915956	0.897902	n.a.	n.a.	n.a.	n.a.	0.9448	0.777	0.641658	0.998
263	Firmicutes; Acholeplasmataceae; Anaeroplasma		both	49.5652	0.478316		0.000151316	0.00071875	0.755167	0.608781	0.623506	0.861289	0.0159231	0.975157	0.874455	0.952157	0.290375	0.462516	0.735805	0.836107
263			SD	32.9377	0.083757		n.a.	0.00192353	0.893563	0.962731	0.881966	0.96657	n.a.	n.a.	n.a.	n.a.	0.736918	0.9904	0.774384	0.592233
263			LQD	65.4391	0.854992		n.a.	0.0014	0.991076	0.658057	0.758124	0.897902	n.a.	n.a.	n.a.	n.a.	0.6144	0.685176	0.751474	0.898594
264	Firmicutes; RF39; RF39		both	85.5072	0.0742875		0.000151316	0.935774	0.921136	0.951677	0.702875	0.914079	0.979676	0.975157	0.977298	0.952157	0.536263	0.9796	0.828947	0.398187
264			SD	75.9644	0.0356477		n.a.	0.878332	0.984464	0.85674	0.796673	0.96657	n.a.	n.a.	n.a.	n.a.	0.944424	0.9904	0.877371	0.924683
264			LQD	94.6176	0.111176		n.a.	0.962	0.9973	0.858542	0.836528	0.987013	n.a.	n.a.	n.a.	n.a.	0.6144	0.986205	0.684751	0.4144
265	Firmicutes; Mycoplasmataceae; Ureaplasma		both	13.0435	0.0107035		0.0729531	0.865972	0.962864	0.384771	0.623506	0.914079	0.119107	0.975157	0.647653	0.952157	0.789547	0.376762	0.828947	0.398187
265			SD	12.4629	0.00752809		n.a.	0.306431	0.984464	0.816859	0.9943	0.96657	n.a.	n.a.	n.a.	n.a.	0.860332	0.934835	0.956348	0.495269
265			LQD	13.5977	0.013735		n.a.	0.217574	0.9973	0.576082	0.479224	0.9632	n.a.	n.a.	n.a.	n.a.	0.9448	0.60928	0.684465	0.777412
274	Firmicutes; Selenomonadaceae; Veillonellaceae_UCG-001		both	18.2609	0.122864		0.462743	0.00071875	0.515583	0.589866	0.452943	0.896689	0.988593	0.851	0.391616	0.935923	0.899067	0.568268	0.921139	0.626111
274			SD	17.8042	0.133909		n.a.	0.000990909	0.5232	0.895819	0.51448	0.96657	n.a.	n.a.	n.a.	n.a.	0.824507	0.934835	0.798062	0.929194
274			LQD	18.6969	0.112319		n.a.	0.0014	0.9973	0.7158	0.915956	0.897902	n.a.	n.a.	n.a.	n.a.	0.80006	0.69	0.684465	0.4144
276	Firmicutes; Syntrophomonadaceae; Syntrophomonas		both	30.8696	0.00810213		0.000151316	0.01725	0.515583	0.795209	0.538941	0.9937	0.138	0.508875	0.552333	0.952157	0.856006	0.904012	0.184958	0.859023
276			SD	19.5846	0.00243086		n.a.	0.588473	0.984464	0.9927	0.986568	0.96657	n.a.	n.a.	n.a.	n.a.	0.824507	0.769912	0.774384	0.754522
276			LQD	41.6431	0.0135163		n.a.	0.0499333	0.3696	0.747733	0.459019	0.987013	n.a.	n.a.	n.a.	n.a.	0.971855	0.986205	0.285271	0.898594
278	Bacteroidota; Muribaculaceae; Muribaculaceae		both	100	16.5451		0.000151316	0.0236053	0.938994	0.841955	0.008625	0.896689	0.00575	0.975157	0.00191667	0.952157	0.433806	0.819453	0.519471	0.516679
278			SD	100	19.3181		n.a.	0.00167692	0.984464	0.9927	0.489592	0.96657	n.a.	n.a.	n.a.	n.a.	0.736918	0.449952	0.679433	0.4905
278			LQD	100	13.8977		n.a.	0.551364	0.9973	0.858542	0.00112	0.897902	n.a.	n.a.	n.a.	n.a.	0.66885	0.69	0.625137	0.856527
279	Bacteroidota; Rikenellaceae; Alistipes		both	100	3.52571		0.000151316	0.800646	0.76275	0.656711	0.060375	0.960841	0.0134167	0.896179	0.00766667	0.952157	0.789547	0.819453	0.921139	0.957375
279			SD	100	2.80955		n.a.	0.0362036	0.984464	0.401743	0.796673	0.96657	n.a.	n.a.	n.a.	n.a.	0.916428	0.666503	0.887083	0.924683
279			LQD	100	4.20941		n.a.	0.109867	0.991076	0.0672	0.00112	0.914849	n.a.	n.a.	n.a.	n.a.	0.80006	0.944486	0.947429	0.808368
280	Bacteroidota; Rikenellaceae; Rikenella		both	69.4203	0.258664		0.000151316	0.00527083	0.904833	0.332952	0.217289	0.861289	0.0453235	0.896179	0.0653684	0.937588	0.391	0.904012	0.573757	0.859023
280			SD	65.2819	0.114483		n.a.	0.595581	0.873817	0.895819	0.522421	0.96657	n.a.	n.a.	n.a.	n.a.	0.83063	0.786496	0.934675	0.929194
280			LQD	73.3711	0.39631		n.a.	0.0129231	0.991076	0.346338	0.0931	0.897902	n.a.	n.a.	n.a.	n.a.	0.621091	0.959127	0.625137	0.808368
281	Bacteroidota; Rs-E47_termite_group; Rs-E47_termite_group		both	75.7971	3.51645		0.000151316	0.112484	0.755167	0.115	0.533929	0.861289	0.317577	0.975157	0.134034	0.952157	0.988092	0.819453	0.763025	0.516679
281			SD	67.6558	1.45075		n.a.	0.00872	0.862735	0.401743	0.0363333	0.96657	n.a.	n.a.	n.a.	n.a.	0.860332	0.97733	0.894677	0.495269
281			LQD	83.5694	5.48852		n.a.	0.894792	0.9973	0.346338	0.785061	0.914849	n.a.	n.a.	n.a.	n.a.	0.9448	0.871476	0.641658	0.777412
282	Bacteroidota; Marinifilaceae; Odoribacter		both	97.1014	1.76688		0.000151316	0.3749	0.941426	0.307474	0.00191667	0.861289	0.0453235	0.975157	0.00191667	0.952157	0.069	0.677837	0.828947	0.689207
282			SD	97.3294	1.22083		n.a.	0.000990909	0.984464	0.9927	0.81339	0.96657	n.a.	n.a.	n.a.	n.a.	0.736918	0.9904	0.887083	0.924683
282			LQD	96.8839	2.28818		n.a.	0.378909	0.9973	0.376533	0.00112	0.897902	n.a.	n.a.	n.a.	n.a.	0.1176	0.777	0.9874	0.808368
283	Bacteroidota; __; __		both	66.8116	1.46489		0.000151316	0.21068	0.974	0.977295	0.921036	0.861289	0.0453235	0.976559	0.0372059	0.937588	0.988092	0.957681	0.638647	0.836107
283			SD	61.7211	0.77817		n.a.	0.325155	0.984464	0.962731	0.05886	0.96657	n.a.	n.a.	n.a.	n.a.	0.975323	0.82136	0.80803	0.3379
283			LQD	71.6714	2.12049		n.a.	0.0693538	0.9973	0.9838	0.280878	0.897902	n.a.	n.a.	n.a.	n.a.	0.965835	0.799273	0.415644	0.898594
286	Desulfobacterota; Desulfovibrionaceae; Desulfovibrio		both	100	8.07263		0.000151316	0.00071875	0.938994	0.343955	0.002875	0.914079	0.888347	0.896179	0.00191667	0.952157	0.76958	0.21965	0.9851	0.944708
286			SD	100	6.14391		n.a.	0.0123864	0.984464	0.9927	0.796673	0.970403	n.a.	n.a.	n.a.	n.a.	0.975313	0.243433	0.778306	0.924683
286			LQD	100	9.91394		n.a.	0.0693538	0.991076	0.258844	0.00112	0.921916	n.a.	n.a.	n.a.	n.a.	0.807437	0.799273	0.641658	0.808368
287	Desulfobacterota; Desulfovibrionaceae; Bilophila		both	97.6812	0.333643		0.000151316	0.0268333	0.755167	0.232654	0.615872	0.914079	0.00805	0.975157	0.552333	0.952157	0.899067	0.950799	0.828947	0.836107
287			SD	95.549	0.0951436		n.a.	0.407138	0.873817	0.754943	0.987716	0.96657	n.a.	n.a.	n.a.	n.a.	0.944424	0.9904	0.894769	0.993
287			LQD	99.7167	0.561332		n.a.	0.0129231	0.9973	0.416985	0.489716	0.9632	n.a.	n.a.	n.a.	n.a.	0.9448	0.959127	0.85792	0.808368
288	Desulfobacterota; Desulfovibrionaceae; __		both	27.971	0.0954108		0.0102824	0.059681	0.755167	0.332952	0.52394	0.861289	0.697494	0.896179	0.552333	0.937588	0.594838	0.728132	0.606846	0.957375
288			SD	22.2552	0.0491533		n.a.	0.109	0.984464	0.895819	0.957156	0.96657	n.a.	n.a.	n.a.	n.a.	0.975323	0.97733	0.887083	0.924683
288			LQD	33.4278	0.139572		n.a.	0.244873	0.991076	0.432938	0.474489	0.897902	n.a.	n.a.	n.a.	n.a.	0.66885	0.799273	0.641658	0.964679
289	Desulfobacterota; Desulfovibrionaceae; uncultured		both	76.5217	0.0295955		0.000151316	0.00328571	0.95231	0.866415	0.002875	0.914079	0.23775	0.975157	0.00191667	0.952157	0.789547	0.9796	0.4525	0.6785
289			SD	59.0504	0.00998641		n.a.	0.00192353	0.984464	0.816859	0.796673	0.96657	n.a.	n.a.	n.a.	n.a.	0.891252	0.934835	0.887083	0.924683
289			LQD	93.2011	0.0483158		n.a.	0.0392	0.9973	0.858542	0.00112	0.944939	n.a.	n.a.	n.a.	n.a.	0.921627	0.959127	0.3248	0.777412
290	Desulfobacterota; __; __		both	92.029	0.510834		0.000151316	0.00135294	0.904833	0.691238	0.887927	0.861289	0.117212	0.896179	0.95604	0.952157	0.544923	0.711264	0.9851	0.836107
290			SD	91.9881	0.653208		n.a.	0.00192353	0.924538	0.962731	0.987716	0.96657	n.a.	n.a.	n.a.	n.a.	0.736918	0.87724	0.932946	0.924683
290			LQD	92.068	0.374914		n.a.	0.11773	0.9973	0.752123	0.859815	0.897902	n.a.	n.a.	n.a.	n.a.	0.9448	0.887345	0.971708	0.808368
292	Spirochaetota; Spirochaetaceae; Termite_Treponema_cluster		both	68.9855	4.32373		0.000151316	0.206521	0.941426	0.795209	0.921036	0.883235	0.633041	0.975157	0.874455	0.937588	0.835263	0.765863	0.519471	0.859023
292			SD	71.8101	7.76504		n.a.	0.441892	0.984464	0.9927	0.978745	0.96657	n.a.	n.a.	n.a.	n.a.	0.860332	0.786496	0.654436	0.924683
292			LQD	66.289	1.03841		n.a.	0.09135	0.991076	0.7158	0.552189	0.897902	n.a.	n.a.	n.a.	n.a.	0.9448	0.799273	0.91459	0.808368
293	Spirochaetota; Spirochaetaceae; Treponema		both	43.6232	0.169644		0.00684524	0.61709	0.755167	0.810894	0.676731	0.861289	0.820333	0.975157	0.939273	0.998	0.789547	0.642	0.184958	0.575676
293			SD	48.0712	0.136436		n.a.	0.39319	0.924538	0.962731	0.849884	0.96657	n.a.	n.a.	n.a.	n.a.	0.9829	0.934835	0.745368	0.924683
293			LQD	39.3768	0.201347		n.a.	0.933978	0.991076	0.7158	0.785061	0.914849	n.a.	n.a.	n.a.	n.a.	0.80006	0.799273	0.2849	0.777412
295	Spirochaetota; Brachyspiraceae; Brachyspira		both	81.7391	0.026385		0.0729531	0.3749	0.904833	0.813867	0.52394	0.861289	0.895083	0.976559	0.351192	0.952157	0.1725	0.950799	0.9851	0.957375
295			SD	80.1187	0.0244813		n.a.	0.473496	0.984464	0.9927	0.987716	0.96657	n.a.	n.a.	n.a.	n.a.	0.475967	0.769912	0.670769	0.929194
295			LQD	83.2861	0.0282024		n.a.	0.733357	0.9973	0.858542	0.168764	0.897902	n.a.	n.a.	n.a.	n.a.	0.5432	0.944486	0.625137	0.962761
296	Campilobacterota; Helicobacteraceae; Helicobacter		both	86.2319	2.95153		0.000151316	0.0585849	0.95231	0.932617	0.0106154	0.883235	0.930761	0.975157	0.134034	0.952157	0.899067	0.462516	0.834795	0.836107
296			SD	82.1958	2.29899		n.a.	0.1417	0.980842	0.9927	0.796673	0.96657	n.a.	n.a.	n.a.	n.a.	0.9829	0.348255	0.798062	0.929194
296			LQD	90.085	3.57448		n.a.	0.267647	0.9973	0.932089	0.0056	0.914849	n.a.	n.a.	n.a.	n.a.	0.9448	0.944486	0.625137	0.808368
297	Proteobacteria; uncultured; uncultured		both	100	1.86826		0.000151316	0.004	0.904833	0.598256	0.114574	0.914079	0.0544737	0.990816	0.354764	0.952157	0.290375	0.510271	0.0983889	0.6785
297			SD	100	2.25085		n.a.	0.00192353	0.984464	0.895819	0.849884	0.970403	n.a.	n.a.	n.a.	n.a.	0.32155	0.934835	0.637413	0.4905
297			LQD	100	1.50301		n.a.	0.589302	0.9973	0.658057	0.0254545	0.914849	n.a.	n.a.	n.a.	n.a.	0.9448	0.685176	0.2176	0.849956
298	Proteobacteria; Paracaedibacteraceae; uncultured		both	89.7101	0.637535		0.000151316	0.00071875	0.962864	0.810386	0.676731	0.883235	0.00164286	0.975157	0.159887	0.952157	0.964357	0.376762	0.606846	0.689629
298			SD	92.5816	0.918767		n.a.	0.000990909	0.984464	0.962207	0.81339	0.96657	n.a.	n.a.	n.a.	n.a.	0.9829	0.624933	0.774384	0.924683
298			LQD	86.9688	0.369049		n.a.	0.842358	0.9973	0.9838	0.0508308	0.914849	n.a.	n.a.	n.a.	n.a.	0.9448	0.60928	0.70304	0.4976
299	Proteobacteria; Rhizobiales_Incertae_Sedis; Bauldia		both	16.5217	0.025755		0.364386	0.0585849	0.938994	0.798493	0.81251	0.914079	0.59606	0.896179	0.933175	0.952157	0.83122	0.117875	0.859306	0.836107
299			SD	13.3531	0.0319214		n.a.	0.211658	0.984464	0.893534	0.986568	0.96657	n.a.	n.a.	n.a.	n.a.	0.824507	0.209522	0.887083	0.826454
299			LQD	19.5467	0.019868		n.a.	0.24416	0.79296	0.73649	0.785061	0.6692	n.a.	n.a.	n.a.	n.a.	0.80006	0.60928	0.9874	0.808368
300	Proteobacteria; uncultured; uncultured		both	35.7971	0.0137433		0.0189884	0.05773	0.755167	0.841955	0.533929	0.914079	0.577506	0.975157	0.29975	0.952157	0.988092	0.809423	0.828947	0.949082
300			SD	40.6528	0.0171821		n.a.	0.176402	0.893563	0.9927	0.986568	0.96657	n.a.	n.a.	n.a.	n.a.	0.860332	0.934835	0.950459	0.65945
300			LQD	31.1615	0.0104604		n.a.	0.325449	0.9973	0.866976	0.038976	0.92857	n.a.	n.a.	n.a.	n.a.	0.80006	0.887345	0.682251	0.4144
301	Proteobacteria; Cellvibrionaceae; __		both	40.5797	0.213739		0.9858	0.555147	0.755167	0.17595	0.615872	0.907733	0.550789	0.896179	0.613102	0.952157	0.808725	0.957681	0.45655	0.73025
301			SD	39.4659	0.213702		n.a.	0.888299	0.985744	0.401743	0.986568	0.96657	n.a.	n.a.	n.a.	n.a.	0.944424	0.97733	0.716675	0.495269
301			LQD	41.6431	0.213774		n.a.	0.368256	0.869292	0.733125	0.489716	0.914849	n.a.	n.a.	n.a.	n.a.	0.9448	0.871476	0.641658	0.962877
302	Proteobacteria; Oxalobacteraceae; Oxalobacter		both	91.4493	0.0812345		0.000151316	0.111105	0.95231	0.661156	0.779095	0.914079	0.100364	0.975157	0.134034	0.952157	0.797619	0.9796	0.7905	0.944708
302			SD	86.9436	0.0380746		n.a.	0.875459	0.984464	0.503217	0.484505	0.96657	n.a.	n.a.	n.a.	n.a.	0.860332	0.97733	0.637413	0.993
302			LQD	95.7507	0.122438		n.a.	0.0499333	0.9973	0.860817	0.300326	0.914849	n.a.	n.a.	n.a.	n.a.	0.9448	0.944486	0.9874	0.898594
303	Proteobacteria; Nitrosomonadaceae; Nitrosomonas		both	84.2029	0.022681		0.000151316	0.61709	0.921136	0.987372	0.588417	0.861289	0.996162	0.975157	0.832842	0.952157	0.855711	0.134167	0.8694	0.839317
303			SD	74.4807	0.0133705		n.a.	0.702304	0.930719	0.960921	0.522421	0.96657	n.a.	n.a.	n.a.	n.a.	0.860332	0.624933	0.798062	0.4905
303			LQD	93.4844	0.0315695		n.a.	0.850295	0.9973	0.939093	0.859815	0.897902	n.a.	n.a.	n.a.	n.a.	0.80006	0.60928	0.971708	0.884665
307	Proteobacteria; Pasteurellaceae; __		both	23.3333	0.00366388		0.0307088	0.221188	0.921136	0.941495	0.676731	0.9937	0.23775	0.896179	0.0301875	0.952157	0.391	0.760949	0.4163	0.6785
307			SD	20.7715	0.00278904		n.a.	0.84639	0.873817	0.962731	0.323367	0.96657	n.a.	n.a.	n.a.	n.a.	0.860332	0.804704	0.798062	0.924683
307			LQD	25.779	0.00449907		n.a.	0.178769	0.991076	0.858542	0.136039	0.9632	n.a.	n.a.	n.a.	n.a.	0.6144	0.951325	0.464221	0.777412
315	Deferribacterota; Deferribacteraceae; Mucispirillum		both	93.7681	1.57695		0.260103	0.00191667	0.755167	0.866415	0.676731	0.28175	0.280284	0.975157	0.660523	0.952157	0.808725	0.819453	0.7905	0.836107
315			SD	88.4273	1.50038		n.a.	0.00363333	0.873817	0.878884	0.9943	0.96657	n.a.	n.a.	n.a.	n.a.	0.824507	0.97733	0.950459	0.495269
315			LQD	98.8669	1.65005		n.a.	0.176736	0.991076	0.376533	0.509756	0.2688	n.a.	n.a.	n.a.	n.a.	0.9448	0.799273	0.684751	0.808368
316	Verrucomicrobiota; Puniceicoccaceae; __		both	92.3188	0.923883		0.000151316	0.00071875	0.755167	0.941495	0.0123214	0.861289	0.820333	0.896179	0.579632	0.937588	0.856006	0.677837	0.023	0.398187
316			SD	96.7359	1.40653		n.a.	0.029212	0.85674	0.9927	0.574317	0.96657	n.a.	n.a.	n.a.	n.a.	0.860332	0.97733	0.0545	0.4905
316			LQD	88.102	0.463109		n.a.	0.0014	0.9973	0.858542	0.00112	0.987013	n.a.	n.a.	n.a.	n.a.	0.971855	0.685176	0.415644	0.808368
317	Verrucomicrobiota; Puniceicoccaceae; uncultured		both	21.3043	0.117602		0.000151316	0.00071875	0.921136	0.560081	0.217289	0.883235	0.00164286	0.975157	0.345719	0.952157	0.76958	0.658191	0.869106	0.836107
317			SD	24.9258	0.217111		n.a.	0.000990909	0.980842	0.759821	0.489592	0.96657	n.a.	n.a.	n.a.	n.a.	0.860332	0.786496	0.887083	0.924683
317			LQD	17.847	0.0226028		n.a.	0.0014	0.9973	0.858542	0.785061	0.987013	n.a.	n.a.	n.a.	n.a.	0.9448	0.777	0.641658	0.463867
319	Actinobacteriota; Eggerthellaceae; Enterorhabdus		both	99.8551	0.285414		0.000151316	0.164213	0.904833	0.608781	0.0466389	0.861289	0.331583	0.936342	0.01035	0.937588	0.290375	0.9796	0.606846	0.859023
319			SD	100	0.146369		n.a.	0.69197	0.980842	0.895819	0.796673	0.96657	n.a.	n.a.	n.a.	n.a.	0.7848	0.97733	0.894769	0.929194
319			LQD	99.7167	0.418157		n.a.	0.171886	0.9973	0.576082	0.00592941	0.897902	n.a.	n.a.	n.a.	n.a.	0.6144	0.959127	0.641658	0.808368
320	Actinobacteriota; Eggerthellaceae; __		both	60.2899	0.0224016		0.000151316	0.059114	0.921136	0.875394	0.623506	0.861289	0.370018	0.896179	0.43581	0.942343	0.544923	0.9796	0.877286	0.88225
320			SD	48.368	0.0119971		n.a.	0.422526	0.788764	0.9927	0.849884	0.96657	n.a.	n.a.	n.a.	n.a.	0.9829	0.980449	0.934675	0.929194
320			LQD	71.6714	0.0323345		n.a.	0.118364	0.9973	0.860817	0.479224	0.897902	n.a.	n.a.	n.a.	n.a.	0.6144	0.986205	0.812461	0.957091
321	Actinobacteriota; Eggerthellaceae; Adlercreutzia		both	67.971	0.0219968		0.457019	0.302265	0.755167	0.115	0.255359	0.882186	0.100364	0.975157	0.34822	0.952157	0.290375	0.376762	0.616443	0.957375
321			SD	68.546	0.0226784		n.a.	0.501127	0.930719	0.772156	0.9943	0.96657	n.a.	n.a.	n.a.	n.a.	0.736918	0.448263	0.887083	0.924683
321			LQD	67.4221	0.0213461		n.a.	0.0458182	0.991076	0.258844	0.0668267	0.897902	n.a.	n.a.	n.a.	n.a.	0.6144	0.799273	0.668331	0.822168
323	Actinobacteriota; Coriobacteriales_Incertae_Sedis; uncultured		both	32.1739	0.0315706		0.942193	0.139238	0.755167	0.999	0.538941	0.861289	0.0345	0.896179	0.7061	0.952157	0.952153	0.9796	0.238846	0.393875
323			SD	9.19881	0.0310876		NA	NA	NA	NA	NA	NA	NA	NA	NA	NA	NA	NA	NA	NA
323			LQD	54.1076	0.0320317		n.a.	0.551364	0.9973	0.858542	0.758124	0.897902	n.a.	n.a.	n.a.	n.a.	0.558756	0.887345	0.641658	0.2772
324	Actinobacteriota; Bifidobacteriaceae; Bifidobacterium		both	11.7391	0.100277		0.000151316	0.00071875	0.774415	0.284944	0.809672	0.861289	0.00164286	0.896179	0.890235	0.937588	0.789547	0.728132	0.767903	0.751333
324			SD	21.9585	0.204781		n.a.	0.000990909	0.873817	0.503217	0.978745	0.96657	n.a.	n.a.	n.a.	n.a.	0.860332	0.870504	0.778306	0.896112
324			LQD	1.983	0.000510157		NA	NA	NA	NA	NA	NA	NA	NA	NA	NA	NA	NA	NA	NA
325	Actinobacteriota; Corynebacteriaceae; Corynebacterium		both	58.8406	0.0162994		0.409335	0.00766667	0.904833	0.973045	0.00191667	0.914079	0.588463	0.975157	0.939273	0.937588	0.594838	0.568268	0.519471	0.831398
325			SD	52.5223	0.0141468		n.a.	0.00167692	0.984464	0.9927	0.05886	0.96657	n.a.	n.a.	n.a.	n.a.	0.736918	0.732536	0.932946	0.495269
325			LQD	64.8725	0.0183545		n.a.	0.211641	0.9973	0.509419	0.00933333	0.897902	n.a.	n.a.	n.a.	n.a.	0.9448	0.935785	0.261046	0.4976
326	Actinobacteriota; Dermabacteraceae; Brachybacterium		both	17.6812	0.00161445		0.852951	0.203167	0.921136	0.905881	0.9793	0.861289	0.546889	0.975157	0.390791	0.937588	0.738447	0.510271	0.781142	0.836107
326			SD	18.1009	0.00165098		n.a.	0.176402	0.930719	0.9927	0.796673	0.96657	n.a.	n.a.	n.a.	n.a.	0.860332	0.288431	0.813475	0.924683
326			LQD	17.2805	0.00157958		n.a.	0.773282	0.9973	0.939093	0.549099	0.897902	n.a.	n.a.	n.a.	n.a.	0.921627	0.9885	0.886468	0.808368
327	Actinobacteriota; Micrococcaceae; Rothia		both	11.1594	0.000994677		0.0307088	0.3749	0.938994	0.598256	0.676731	0.861289	0.588463	0.896179	0.607316	0.937588	0.999	0.957681	0.519471	0.859023
327			SD	8.90208	0.000727888		NA	NA	NA	NA	NA	NA	NA	NA	NA	NA	NA	NA	NA	NA
327			LQD	13.3144	0.00124937		n.a.	0.908433	0.9973	0.728	0.569455	0.897902	n.a.	n.a.	n.a.	n.a.	0.80006	0.986205	0.2176	0.808368
330	Cyanobacteria; Gastranaerophilales; Gastranaerophilales		both	91.5942	0.188343		0.844991	0.0688083	0.755167	0.357	0.0130333	0.861289	0.380293	0.896179	0.295167	0.952157	0.952153	0.376762	0.606846	0.803663
330			SD	92.5816	0.1864		n.a.	0.0478194	0.788764	0.962731	0.796673	0.96657	n.a.	n.a.	n.a.	n.a.	0.824507	0.209522	0.745368	0.672009
330			LQD	90.6516	0.190198		n.a.	0.733357	0.9973	0.3472	0.00112	0.897902	n.a.	n.a.	n.a.	n.a.	0.932213	0.986205	0.846566	0.962761
331	Patescibacteria; Saccharimonadaceae; Candidatus_Saccharimonas		both	81.4493	0.0365724		0.000151316	0.396349	0.755167	0.563205	0.615872	0.914079	0.750694	0.896179	0.445966	0.937588	0.952153	0.386818	0.859306	0.836107
331			SD	70.0297	0.0161484		n.a.	0.595581	0.984464	0.895819	0.849884	0.96657	n.a.	n.a.	n.a.	n.a.	0.860332	0.624933	0.798062	0.993
331			LQD	92.3513	0.0560707		n.a.	0.45159	0.991076	0.432938	0.445722	0.897902	n.a.	n.a.	n.a.	n.a.	0.9878	0.69	0.9874	0.808368

[truncated: 4 more sheets: TS9_Phylum_AbsAbund_LFC_P, TS10_Genus_AbsAbund_LFC_P, TS11_Corr_Alpha_RelAbund, TS12_Corr_AbsAbund]
