# Supplementary material for: Experimental evolution of a mammalian holobiont: selection for herbivorous capability in bank voles yields distinct and robust gut microbial communities
Source: Research Square preprint supplement (doi:10.21203/rs.3.rs-4765186/v1), 2024-08-05
Supplement: Supplementary file 2 [file 653af9cbd9716b8b7e709152.xlsx]

## Sheet: info_file
Data for project presented in "Experimental evolution of a mammalian holobiont: selection for herbivorous capability in bank voles yields distinct and robust gut microbial communities"
by Małgorzata M. Lipowska, Edyta T. Sadowska, Kevin D. Kohl, Paweł Koteja
Project performed within the long-term artificial selection experiment on bank voles
Aim of the project: studying the effects of selection for herbivorous capability on the vole's gut microbiome and its association with performance in the selection trial
Cohabitation experiment - animals allowed horizontal microbial transfer with an unrelated individual
database combining data from cohabitation, food consumption tests, microbiome taxonomic composition and diversity metrics
taxonomic classification and absolute abundances of ASVs per animal
Sheets
Individual_Data	Simplified metadata and performance traits measured during the feeding trial of each animal
ASV_Taxonomy	List of recognized ASVs with taxonomic classification information
ASV_Individual_AbsAbund_Matrix	Matrix of absolute abundances of ASVs found in each individual
Individual_Data Legend
IR	record number of individual
IRWn	record number of individual at weaning
T	selection direction of individual (C - control, H - herbivorous)
L	replicate line of individual
IDD	identification number of individual's mother
T_coh	selection direction of cohabitant (C - control, H - herbivorous)
L_coh	replicate line of cohabitant
LSWn	litter size at individual's weaning
S	individual's sex at cohabitation (0-female, 1-male)
CT	type of cage an individual is placed to at separation ("IVC" - IVC cages with perforated floor and no bedding, "SC" - regular cages with sawdust bedding)
Diet	type of food the individual will be given during the experimant (SD - standard diet, LQD - low-quality diet) - LQD animals receive a pellet of low-quality diet into a cage during separation
Time_MH0	time at the start of the feeding trial
M_MH0	body mass at the start of the feeding trial [g]
Time_MH1	time at day 1 of the feeding trial
M_MH1	body mass at day 1 of the feeding trial [g]
Day_MH5_relB	number of days between the date at dissection (day 5 of the feeding trial) and the first birth in the experiment (2018-09-05)
Time_MH5	time at dissection relative to the first birth in the experiment (number of days since 2018-09-05)
M_MH5	body mass at dissection [g]
FC_15	dry mass of food consumed per day between day 1 and 5 of the feeding trial [g/day]
FD_15	mass of food digested per day between day 1 and 5 of the feeding trial [g/day]
AD_15	approximate digestability of food consumed between day 1 and 5 of the feeding trial [%]
dM_05	change of body mass betweenday 0 and 5 of the feeding trial [g]
Ci	Presence of [Clostridium]_innocuum_group bacteria (1-present, 0-absent), exception for four individuals (IRWn=1818, 1578 - certain cases; IRWn=2745, 1950 - borderline cases) where Ci was not found but samples grouped with the Ci=1 cloud on PCoa graphs and on the heatmap
Out_dM05	if an individual is an outlier in dM_05 analyses (1=yes)
Out_Alpha	if an individual is an outlier in alpha-diversity analyses (1=yes)
Out_AD	if an individual is an outlier in FC_15, FD_15 and AD_15 analyses (1=yes)
T_eff	effect-coded factor T
T_coh_eff	effect-coded factor T_coh
S_eff	effect-coded factor S
CT_eff	effect-coded factor CT
Diet_eff	effect-coded factor Diet
TT_coh_eff	effect-coded interaction between factors T and T_coh
TDiet_eff	effect-coded interaction between factors T and Diet
T_cohDiet_eff	effect-coded interaction between factors T_coh and Diet
CTDiet_eff	effect-coded interaction between factors CT and Diet
TT_cohDiet_eff	effect-coded interaction between factors T, T_coh and Diet

## Sheet: Individual_Data
IR	IRWn	T	L	IDD	T_coh	L_coh	LSWn	S	CT	Diet	Time_MH0	M_MH0	Time_MH1	M_MH1	Day_MH5_relB	Time_MH5	M_MH5	FC_15	FD_15	AD_15	dM_05	Ci	Out_dM05	Out_Alpha	Out_AD	T_eff	T_coh_eff	S_eff	CT_eff	Diet_eff	TT_coh_eff	TDiet_eff	T_cohDiet_eff	CTDiet_eff	TT_cohDiet_eff
3	1126	C	C4	BM06696	C	C1	6	1	SC	LQD	0.448611	20.98	0.449306	18.99	42	0.475	18.08				-2.9	0				-1	-1	1	-1	1	1	-1	-1	-1	1
5	1128	C	C4	BM06696	H	H3	6	1	SC	LQD	0.449306	21.26	0.45	19.77	42	0.477778	18.308				-2.952	0				-1	1	1	-1	1	-1	-1	1	-1	-1
23	1160	H	H3	BM05865	H	H1	3	0	SC	LQD	0.452778	23.08	0.451389	21.76	42	0.488194	20.199				-2.881	0				1	1	-1	-1	1	1	1	1	-1	1
34	1213	H	H2	BM05635	C	C3	7	1	SC	LQD	0.454167	24.99	0.452778	24.05	42	0.494444	24.5				-0.49	0				1	-1	1	-1	1	-1	1	-1	-1	-1
58	1264	H	H4	BM06501	H	H3	4	1	SC	LQD	0.461111	25.66	0.45625	24.39	42	0.508333	23.712				-1.948	0				1	1	1	-1	1	1	1	1	-1	1
38	1269	H	H1	BM06326	C	C3	5	0	SC	LQD	0.45625	21.86	0.453472	21.1	42	0.497222	22.216				0.356	0				1	-1	-1	-1	1	-1	1	-1	-1	-1
8	1270	H	H1	BM06326	C	C4	5	0	SC	LQD	0.45	19.82	0.45	18.24	42	0.479861	17.262				-2.558	0				1	-1	-1	-1	1	-1	1	-1	-1	-1
20	1271	H	H1	BM06326	H	H4	5	1	SC	LQD	0.452083	23.67	0.451389	24.17	42	0.484722	23.814				0.144	0				1	1	1	-1	1	1	1	1	-1	1
60	1275	H	H4	BM05929	C	C4	4	1	SC	LQD	0.461806	21.8	0.456944	20.9	42	0.511806	21.51				-0.29	0				1	-1	1	-1	1	-1	1	-1	-1	-1
71	1284	H	H3	BM06367	H	H1	5	1	SC	LQD	0.469444	25.36	0.457639	24.48	43	0.4875	23.48				-1.88	0				1	1	1	-1	1	1	1	1	-1	1
77	1287	H	H2	BM06459	C	C2	6	0	SC	LQD	0.470833	19.68	0.458333	18.38	43	0.490278	18.734				-0.946	0				1	-1	-1	-1	1	-1	1	-1	-1	-1
79	1288	H	H2	BM06459	C	C1	6	0	SC	LQD	0.471528	21.78	0.459028	20.59	43	0.491667	21.355				-0.425	0				1	-1	-1	-1	1	-1	1	-1	-1	-1
22	1289	H	H2	BM06459	H	H3	6	1	SC	LQD	0.461806	22.44	0.452083	21.55	43	0.470833	21.742				-0.698	0				1	1	1	-1	1	1	1	1	-1	1
87	1298	H	H1	BM05271	H	H2	8	0	IVC	LQD	0.398611	17.94	0.331944	17.35	43	0.367361	18.868	5.74555	3.3383	58.1024	0.928	0				1	1	-1	1	1	1	1	1	1	1
72	1300	H	H1	BM05271	H	H3	8	1	IVC	LQD	0.392361	24.04	0.326389	23.41	43	0.35625	25.056	6.34162	3.67937	58.0194	1.016	0				1	1	1	1	1	1	1	1	1	1
86	1312	H	H4	BM06350	H	H1	6	0	SC	LQD	0.473611	22.61	0.460417	22.82	43	0.496528	22.613				0.003	0				1	1	-1	-1	1	1	1	1	-1	1
107	1326	C	C2	BM04184	C	C1	5	1	SC	LQD	0.479167	21.35	0.464583	19	43	0.509722	16.412				-4.938	0				-1	-1	1	-1	1	1	-1	-1	-1	1
62	1328	C	C2	BM06893	C	C4	6	0	SC	LQD	0.465972	16.95	0.455556	17.46	43	0.479861	16.984				0.034	0				-1	-1	-1	-1	1	1	-1	-1	-1	1
111	1329	C	C2	BM06893	H	H2	6	1	SC	LQD	0.48125	19.63	0.465278	18.58	43	0.513194	18.058				-1.572	0				-1	1	1	-1	1	-1	-1	1	-1	-1
113	1330	C	C2	BM06893	H	H4	6	0	SC	LQD	0.481944	17.48	0.465972	16.17	43	0.515278	11.651				-5.829	0				-1	1	-1	-1	1	-1	-1	1	-1	-1
115	1331	C	C2	BM06893	C	C1	6	1	IVC	LQD	0.411111	24.39	0.342361	23.09	43	0.388889	23.792	6.14344	3.55244	57.8249	-0.598	0				-1	-1	1	1	1	1	-1	-1	1	1
4	1338	C	C1	BM06543	C	C4	6	1	IVC	LQD	0.388889	24.43	0.322917	23.54	43	0.349306	23.271	5.30162	2.99312	56.4567	-1.159	0				-1	-1	1	1	1	1	-1	-1	1	1
70	1339	C	C1	BM06543	H	H3	6	1	SC	LQD	0.46875	23.39	0.456944	21.41	43	0.486111	18.816				-4.574	0				-1	1	1	-1	1	-1	-1	1	-1	-1
125	1348	C	C1	BM06763	H	H1	6	1	SC	LQD	0.483333	21.57	0.467361	20.62	43	0.51875	19.672				-1.898	0				-1	1	1	-1	1	-1	-1	1	-1	-1
16	1349	C	C1	BM06763	H	H4	6	1	SC	LQD	0.460417	23.63	0.451389	20.96	43	0.467361	18.782				-4.848	0				-1	1	1	-1	1	-1	-1	1	-1	-1
28	1352	H	H2	BM05812	H	H3	6	0	SC	LQD	0.4625	21.87	0.452778	20.72	43	0.472222	21.251				-0.619	0				1	1	-1	-1	1	1	1	1	-1	1
135	1381	C	C1	BM04208	H	H2	7	1	IVC	LQD	0.416667	23.18	0.348611	21.89	43	0.398611	22.085	5.41287	3.11637	57.5733	-1.095	0				-1	1	1	1	1	-1	-1	1	1	-1
139	1385	C	C1	BM04208	H	H4	7	1	IVC	LQD	0.419444	27.18	0.35	26.15	43	0.402083	26.862	8.11613	4.36063	53.7279	-0.318	1				-1	1	1	1	1	-1	-1	1	1	-1
141	1386	C	C1	BM06269	C	C3	6	1	IVC	LQD	0.420833	22.55	0.351389	20.27	43	0.404861	20.545	4.76267	2.75217	57.7863	-2.005	0				-1	-1	1	1	1	1	-1	-1	1	1
145	1388	C	C1	BM06269	C	C4	6	0	IVC	LQD	0.422917	18.44	0.353472	16.81	43	0.407639	18.093	5.57514	3.22989	57.9338	-0.347	0				-1	-1	-1	1	1	1	-1	-1	1	1
151	1400	C	C4	BM04161	H	H1	5	0	SC	LQD	0.490278	17.47	0.472222	14.57	43	0.534722	13.867				-3.603	0				-1	1	-1	-1	1	-1	-1	1	-1	-1
155	1403	C	C4	BM04161	C	C1	5	0	IVC	LQD	0.426389	21.76	0.356944	21.11	43	0.413889	21.948	6.48103	3.66078	56.4846	0.188	0				-1	-1	-1	1	1	1	-1	-1	1	1
159	1413	H	H2	BM06491	C	C2	8	0	IVC	LQD	0.427778	18.18	0.357639	18.16	43	0.415278	18.434	5.94234	3.26684	54.9757	0.254	0				1	-1	-1	1	1	-1	1	-1	1	-1
163	1416	H	H2	BM06491	H	H4	8	0	SC	LQD	0.49375	18.03	0.475	18.16	43	0.542361	19.992				1.962	0				1	1	-1	-1	1	1	1	1	-1	1
88	1417	H	H2	BM06491	H	H1	8	0	SC	LQD	0.474306	20.09	0.461111	20.16	43	0.497917	20.707				0.617	0				1	1	-1	-1	1	1	1	1	-1	1
136	1420	H	H2	BM04695	C	C1	8	1	SC	LQD	0.486806	23.4	0.469444	22.91	43	0.525694	24.45				1.05	0				1	-1	1	-1	1	-1	1	-1	-1	-1
169	1433	C	C1	BM04482	H	H3	5	0	SC	LQD	0.496528	18.7	0.476389	16.93	43	0.548611	16.34				-2.36	0				-1	1	-1	-1	1	-1	-1	1	-1	-1
80	1434	C	C1	BM04482	H	H2	5	0	IVC	LQD	0.394444	18.82	0.327778	17.66	43	0.361111	19.03	5.88596	3.51221	59.671	0.21	0				-1	1	-1	1	1	-1	-1	1	1	-1
156	1436	C	C1	BM04482	C	C4	5	0	SC	LQD	0.490972	20.2	0.472222	18.87	43	0.536111	17.588				-2.612	0				-1	-1	-1	-1	1	1	-1	-1	-1	1
114	1457	H	H4	BM06373	C	C2	7	0	IVC	LQD	0.409722	23.03	0.341667	23.05	43	0.386806	24.536	6.62541	3.77516	56.98	1.506	0				1	-1	-1	1	1	-1	1	-1	1	-1
175	1459	H	H4	BM06373	C	C1	7	1	SC	LQD	0.497917	24.9	0.477778	25.08	43	0.552083	25.41				0.51	0				1	-1	1	-1	1	-1	1	-1	-1	-1
177	1460	H	H4	BM06373	H	H1	7	1	SC	LQD	0.499306	25.05	0.478472	24.67	43	0.554167	25.793				0.743	0				1	1	1	-1	1	1	1	1	-1	1
183	1477	H	H1	BM04841	H	H4	6	0	IVC	LQD	0.4375	21.68	0.366667	22.42	43	0.43125	23.481	6.41245	3.66445	57.1459	1.801	0				1	1	-1	1	1	1	1	1	1	1
30	1478	H	H1	BM04841	H	H3	6	0	SC	LQD	0.463194	24.23	0.453472	23.33	43	0.473611	23.472				-0.758	0				1	1	-1	-1	1	1	1	1	-1	1
12	1490	H	H2	BM06335	C	C4	5	1	SC	LQD	0.459028	26.26	0.45	24.62	43	0.464583	25.818				-0.442	0				1	-1	1	-1	1	-1	1	-1	-1	-1
130	1507	H	H4	BM06349	H	H2	4	1	SC	LQD	0.485417	23.4	0.46875	21.99	43	0.522222	19.33				-4.07	0				1	1	1	-1	1	1	1	1	-1	1
110	1508	C	C4	BM05496	C	C2	4	0	IVC	LQD	0.407639	21.42	0.340278	20.8	43	0.382639	20.505	6.28902	3.52727	56.0862	-0.915	0				-1	-1	-1	1	1	1	-1	-1	1	1
40	1513	C	C2	BM04854	H	H4	7	1	SC	LQD	0.463889	21.52	0.453472	18.91	43	0.475694	18.474				-3.046	0				-1	1	1	-1	1	-1	-1	1	-1	-1
138	1517	C	C2	BM04854	C	C1	7	0	SC	LQD	0.4875	19.07	0.470139	17.84	43	0.527778	16.774				-2.296	0				-1	-1	-1	-1	1	1	-1	-1	-1	1
174	1525	H	H3	BM06820	H	H4	7	0	SC	LQD	0.497222	20.73	0.477083	20.31	43	0.550694	17.002				-3.728	0				1	1	-1	-1	1	1	1	1	-1	1
64	1529	C	C1	BM05754	C	C4	5	1	SC	LQD	0.466667	17.91	0.455556	17.09	43	0.482639	15.726				-2.184	0				-1	-1	1	-1	1	1	-1	-1	-1	1
94	1531	C	C1	BM05754	H	H4	5	0	SC	LQD	0.476389	16.46	0.4625	13.54	43	0.502778	14.108				-2.352	0				-1	1	-1	-1	1	-1	-1	1	-1	-1
82	1533	H	H1	BM06735	H	H2	4	1	IVC	LQD	0.395833	20.01	0.329167	20.19	43	0.363194	23.076	6.61726	3.83776	57.9962	3.066	0				1	1	1	1	1	1	1	1	1	1
104	1536	H	H1	BM06735	C	C2	4	0	IVC	LQD	0.405556	23.4	0.338194	23.85	43	0.379167	23.744	5.76132	3.29232	57.1452	0.344	0				1	-1	-1	1	1	-1	1	-1	1	-1
188	1539	H	H1	BM06734	H	H2	4	1	SC	LQD	0.502778	22.33	0.480556	20.95	43	0.561806	22.831				0.501	0				1	1	1	-1	1	1	1	1	-1	1
196	1544	C	C1	BM05851	H	H1	6	0	IVC	LQD	0.440972	17.74	0.369444	17.05	43	0.436111	16.915	4.90688	2.82238	57.5188	-0.825	0				-1	1	-1	1	1	-1	-1	1	1	-1
162	1545	C	C1	BM05851	H	H2	6	1	SC	LQD	0.493056	20.6	0.474306	19.59	43	0.540972	18.265				-2.335	0				-1	1	1	-1	1	-1	-1	1	-1	-1
142	1566	C	C3	BM05303	C	C1	4	1	SC	LQD	0.486111	23.29	0.470139	21.85	44	0.470139	20.02				-3.27	0				-1	-1	1	-1	1	1	-1	-1	-1	1
205	1569	C	C2	BM04624	H	H1	6	0	SC	LQD	0.492361	20.49	0.473611	17.66	44	0.481944	17.691				-2.799	0				-1	1	-1	-1	1	-1	-1	1	-1	-1
202	1570	C	C2	BM04624	C	C3	6	1	SC	LQD	0.490278	24.69	0.472917	20.2	44	0.479167	21.513				-3.177	0				-1	-1	1	-1	1	1	-1	-1	-1	1
207	1571	C	C2	BM04624	H	H4	6	0	IVC	LQD	0.391667	21.76	0.361111	20.3	44	0.341667	20.145	4.45879	2.65954	59.6472	-1.615	0				-1	1	-1	1	1	-1	-1	1	1	-1
225	1583	C	C4	BM04231	H	H3	5	0	IVC	LQD	0.401389	20.14	0.369444	19.01	44	0.356944	17.406	3.16255	1.87005	59.131	-2.734	1				-1	1	-1	1	1	-1	-1	1	1	-1
239	1593	C	C4	BM06053	H	H3	5	0	SC	LQD	0.50625	17.62	0.478472	16.13	44	0.507639	14.395				-3.225	0				-1	1	-1	-1	1	-1	-1	1	-1	-1
212	1597	C	C1	BM06557	C	C2	2	1	SC	LQD	0.495833	21.04	0.474306	18.99	44	0.486111	17.367				-3.673	0				-1	-1	1	-1	1	1	-1	-1	-1	1
247	1598	C	C3	BM04373	H	H4	5	1	SC	LQD	0.510417	20.5	0.479861	18.65	44	0.5125	17.16				-3.34	0				-1	1	1	-1	1	-1	-1	1	-1	-1
118	1601	C	C3	BM04373	C	C2	5	1	SC	LQD	0.484028	19.76	0.46875	18.25	44	0.465972	16.512				-3.248	0				-1	-1	1	-1	1	1	-1	-1	-1	1
146	1603	C	C4	BM04348	C	C1	4	0	SC	LQD	0.4875	17.8	0.471528	15.77	44	0.472917	12.355				-5.445	0				-1	-1	-1	-1	1	1	-1	-1	-1	1
253	1604	C	C4	BM04348	H	H1	4	0	IVC	LQD	0.413889	20.01	0.382639	19.74	44	0.376389	19.777	5.30494	3.15319	59.4388	-0.233	0				-1	1	-1	1	1	-1	-1	1	1	-1
182	1606	C	C4	BM04348	H	H2	4	1	IVC	LQD	0.386806	21.54	0.35625	20.15	44	0.334722	20.537	5.42073	3.16998	58.4789	-1.003	0				-1	1	1	1	1	-1	-1	1	1	-1
98	1638	H	H4	BM06563	H	H2	6	0	SC	LQD	0.483333	21.57	0.46875	22.14	44	0.464583	22.958				1.388	0				1	1	-1	-1	1	1	1	1	-1	1
263	1644	C	C2	BM05737	H	H3	8	0	SC	LQD	0.513194	22.59	0.48125	20.99	44	0.518056	20.28				-2.31	0				-1	1	-1	-1	1	-1	-1	1	-1	-1
222	1649	C	C2	BM05737	C	C4	8	1	SC	LQD	0.5	24.06	0.476389	21.86	44	0.493056	20.37				-3.69	0				-1	-1	1	-1	1	1	-1	-1	-1	1
268	1659	H	H2	BM06329	C	C2	5	1	SC	LQD	0.514583	27.94	0.481944	26.71	44	0.520833	26.669				-1.271	0				1	-1	1	-1	1	-1	1	-1	-1	-1
273	1661	H	H2	BM06329	H	H1	5	1	SC	LQD	0.517361	27.68	0.483333	27.85	44	0.525694	28.539				0.859	0				1	1	1	-1	1	1	1	1	-1	1
277	1663	H	H2	BM06329	C	C3	5	0	SC	LQD	0.51875	23.58	0.484028	23.14	44	0.528472	24.58				1	0				1	-1	-1	-1	1	-1	1	-1	-1	-1
238	1664	H	H4	BM05298	C	C4	5	0	SC	LQD	0.505556	21.18	0.478472	20.6	44	0.50625	21.574				0.394	0				1	-1	-1	-1	1	-1	1	-1	-1	-1
172	1665	H	H4	BM05298	C	C1	5	0	SC	LQD	0.488194	23.01	0.472222	21.59	44	0.474306	22.368				-0.642	0				1	-1	-1	-1	1	-1	1	-1	-1	-1
279	1668	H	H4	BM05298	C	C3	5	0	IVC	LQD	0.427083	22.84	0.394444	22.2	44	0.400694	22.213	5.67507	3.24807	57.234	-0.627	0				1	-1	-1	1	1	-1	1	-1	1	-1
144	1705	H	H1	BM06048	C	C1	6	1	SC	LQD	0.486806	23.08	0.470833	20.63	44	0.471528	18.423				-4.657	0				1	-1	1	-1	1	-1	1	-1	-1	-1
242	1707	H	H1	BM06048	C	C4	6	1	SC	LQD	0.507639	27.66	0.479167	25.95	44	0.509722	24.24				-3.42	0				1	-1	1	-1	1	-1	1	-1	-1	-1
283	1712	C	C2	BM06752	H	H2	8	0	IVC	LQD	0.429167	17.33	0.396528	16.28	44	0.405556	16.537	5.14437	2.78987	54.2315	-0.793	1				-1	1	-1	1	1	-1	-1	1	1	-1
285	1713	C	C2	BM06752	C	C4	8	1	IVC	LQD	0.429861	24.15	0.397917	24.15	44	0.406944	25.244	6.46196	3.62321	56.0699	1.094	0				-1	-1	1	1	1	1	-1	-1	1	1
289	1717	C	C2	BM06752	H	H1	8	0	IVC	LQD	0.431944	20.87	0.399306	20.16	44	0.410417	18.945	4.07569	2.31719	56.8539	-1.925	0				-1	1	-1	1	1	-1	-1	1	1	-1
291	1718	C	C2	BM06752	C	C3	8	0	SC	LQD	0.522222	18.51	0.486111	15.84	44	0.534722	14.221				-4.289	0				-1	-1	-1	-1	1	1	-1	-1	-1	1
293	1725	C	C1	BM05824	H	H1	3	1	IVC	LQD	0.434028	22.23	0.401389	21.7	44	0.413194	22.402	5.63071	3.18621	56.5863	0.172	0				-1	1	1	1	1	-1	-1	1	1	-1
297	1727	C	C1	BM05824	H	H3	3	0	IVC	LQD	0.435417	20.98	0.402778	20.22	44	0.414583	21.727	5.93518	3.38718	57.0696	0.747	0				-1	1	-1	1	1	-1	-1	1	1	-1
128	1728	C	C4	BM06693	H	H2	6	0	IVC	LQD	0.382639	17.94	0.352778	17.34	44	0.328472	18.995	7.14947	3.92347	54.8778	1.055	0				-1	1	-1	1	1	-1	-1	1	1	-1
220	1729	C	C4	BM06693	H	H4	6	1	SC	LQD	0.498611	24.12	0.475694	22.26	44	0.491667	18.96				-5.16	0				-1	1	1	-1	1	-1	-1	1	-1	-1
288	1755	H	H4	BM06359	C	C2	4	0	SC	LQD	0.521528	20.15	0.485417	20.44	44	0.533333	20.115				-0.035	0				1	-1	-1	-1	1	-1	1	-1	-1	-1
272	1759	C	C3	BM06712	H	H2	5	1	SC	LQD	0.516667	22.81	0.482639	20.78	44	0.524306	22.038				-0.772	0				-1	1	1	-1	1	-1	-1	1	-1	-1
244	1761	C	C3	BM06712	C	C4	5	0	IVC	LQD	0.409722	21.76	0.377083	20.24	44	0.370139	20.612	5.41133	3.14808	58.1757	-1.148	0				-1	-1	-1	1	1	1	-1	-1	1	1
266	1765	C	C3	BM06002	C	C2	5	1	IVC	LQD	0.41875	18.07	0.3875	16.54	44	0.386111	15.727	4.07933	2.34408	57.4624	-2.343	0				-1	-1	1	1	1	1	-1	-1	1	1
282	1766	C	C3	BM06002	H	H1	5	0	SC	LQD	0.520139	15.83	0.484722	13.85	44	0.529861	12.292				-3.538	0				-1	1	-1	-1	1	-1	-1	1	-1	-1
278	1767	C	C3	BM06002	H	H2	5	0	IVC	LQD	0.425694	17.21	0.39375	15.75	44	0.398611	15.401	3.64182	2.18957	60.123	-1.809	0				-1	1	-1	1	1	-1	-1	1	1	-1
307	1773	H	H3	BM06364	H	H1	4	0	IVC	LQD	0.439583	25.21	0.40625	23.48	44	0.422222	23.357	6.13798	3.38423	55.1359	-1.853	0				1	1	-1	1	1	1	1	1	1	1
309	1776	H	H3	BM06364	H	H4	4	1	SC	LQD	0.527083	26.19	0.488194	25.28	44	0.544444	21.351				-4.839	0				1	1	1	-1	1	1	1	1	-1	1
236	1777	H	H1	BM06560	C	C1	7	0	SC	LQD	0.504861	21.43	0.478472	20.14	44	0.504861	19.885				-1.545	0				1	-1	-1	-1	1	-1	1	-1	-1	-1
252	1779	H	H1	BM06560	C	C3	7	1	SC	LQD	0.511111	25.31	0.480556	24.12	44	0.513889	25.812				0.502	0				1	-1	1	-1	1	-1	1	-1	-1	-1
270	1783	H	H1	BM06560	C	C2	7	0	SC	LQD	0.515278	21.76	0.482639	21.48	44	0.522222	21.555				-0.205	0				1	-1	-1	-1	1	-1	1	-1	-1	-1
226	1790	H	H3	BM06845	C	C4	5	0	SC	LQD	0.501389	20.94	0.477083	20.92	44	0.495833	19.131				-1.809	0				1	-1	-1	-1	1	-1	1	-1	-1	-1
310	1795	H	H4	BM06480	H	H3	7	1	IVC	LQD	0.440972	23.04	0.406944	22.4	44	0.422917	22.94	6.98482	3.89282	55.7326	-0.1	0				1	1	1	1	1	1	1	1	1	1
164	1797	H	H4	BM06480	H	H2	7	0	IVC	LQD	0.384722	21.95	0.354167	21.65	44	0.33125	21.851	6.83312	3.89687	57.0292	-0.099	0				1	1	-1	1	1	1	1	1	1	1
311	1798	H	H4	BM06480	C	C1	7	1	SC	LQD	0.527778	22.54	0.488889	21.58	44	0.545833	21.844				-0.696	0				1	-1	1	-1	1	-1	1	-1	-1	-1
315	1803	H	H3	BM04824	H	H2	6	0	SC	LQD	0.529167	22.31	0.488889	21.59	44	0.547917	17.896				-4.414	0				1	1	-1	-1	1	1	1	1	-1	1
317	1805	H	H3	BM04824	C	C4	6	0	IVC	LQD	0.443056	24.45	0.409028	23.5	44	0.426389	24.718	7.05812	3.95237	55.9975	0.268	0				1	-1	-1	1	1	-1	1	-1	1	-1
323	1810	H	H4	BM06791	C	C2	5	1	SC	LQD	0.495833	26.44	0.484722	25.11	45	0.425694	24.889				-1.551	0				1	-1	1	-1	1	-1	1	-1	-1	-1
325	1811	H	H4	BM06791	C	C3	5	0	SC	LQD	0.496528	23.23	0.484722	23.14	45	0.427083	24.516				1.286	0				1	-1	-1	-1	1	-1	1	-1	-1	-1
331	1814	C	C3	BM05957	H	H1	6	1	SC	LQD	0.497917	17.31	0.486111	15.76	45	0.43125	15.626				-1.684	0				-1	1	1	-1	1	-1	-1	1	-1	-1
234	1816	C	C3	BM05957	C	C1	6	0	IVC	LQD	0.41875	18.06	0.403472	16.88	45	0.357639	16.584	4.54444	2.62044	57.6626	-1.476	0				-1	-1	-1	1	1	1	-1	-1	1	1
337	1853	H	H2	BM05924	H	H1	4	1	IVC	LQD	0.432639	28.37	0.416667	27.8	45	0.375	29.259	8.30845	4.6187	55.5904	0.889	0				1	1	1	1	1	1	1	1	1	1
339	1854	H	H2	BM05924	H	H4	4	1	SC	LQD	0.5	25.33	0.4875	23.64	45	0.4375	23.937				-1.393	0				1	1	1	-1	1	1	1	1	-1	1
316	1861	H	H2	BM05910	H	H3	7	0	IVC	LQD	0.422222	24.55	0.406944	23.52	45	0.363194	24.051	6.39748	3.67298	57.4129	-0.499	0				1	1	-1	1	1	1	1	1	1	1
343	1865	H	H2	BM05910	H	H1	7	0	IVC	LQD	0.435417	23.7	0.419444	23.34	45	0.379861	24.605	6.28034	3.62609	57.7372	0.905	0				1	1	-1	1	1	1	1	1	1	1
347	1886	H	H1	BM06496	C	C2	6	1	IVC	LQD	0.436111	20.97	0.420833	22.42	45	0.38125	24.126	6.51241	3.68066	56.5176	3.156	0				1	-1	1	1	1	-1	1	-1	1	-1
332	1890	H	H1	BM06496	C	C3	6	1	IVC	LQD	0.429167	23.4	0.413194	23.23	45	0.370833	23.32	5.52595	3.17945	57.5367	-0.08	0				1	-1	1	1	1	-1	1	-1	1	-1
355	1897	H	H2	BM05332	C	C4	8	0	SC	LQD	0.502083	19.09	0.488889	18.08	45	0.445833	19.25				0.16	0		1		1	-1	-1	-1	1	-1	1	-1	-1	-1
322	1914	H	H1	BM06876	H	H4	5	0	SC	LQD	0.495833	18.91	0.484028	18.64	45	0.425	18.954				0.044	1				1	1	-1	-1	1	1	1	1	-1	1
361	1917	C	C4	BM06536	C	C3	6	1	SC	LQD	0.502778	22.56	0.489583	20.06	45	0.449306	19.677				-2.883	0				-1	-1	1	-1	1	1	-1	-1	-1	1
365	1919	C	C4	BM06536	H	H4	6	0	SC	LQD	0.503472	18.01	0.490278	16.43	45	0.451389	14.451				-3.559	0				-1	1	-1	-1	1	-1	-1	1	-1	-1
260	1929	C	C4	BM04197	H	H4	5	1	SC	LQD	0.490972	21.79	0.479861	19.36	45	0.4125	15.362				-6.428	1				-1	1	1	-1	1	-1	-1	1	-1	-1
334	1932	C	C4	BM04197	C	C3	5	1	IVC	LQD	0.429861	23.53	0.414583	21.79	45	0.372222	22.841	6.51676	3.61076	55.4073	-0.689	1				-1	-1	1	1	1	1	-1	-1	1	1
377	1939	H	H4	BM06392	H	H1	8	1	SC	LQD	0.505556	19.63	0.492361	19.82	45	0.457639	17.347				-2.283	0				1	1	1	-1	1	1	1	1	-1	1
370	1946	H	H1	BM05270	C	C4	7	0	IVC	LQD	0.446528	22.71	0.430556	24.07	45	0.395833	24.214	6.59283	3.90483	59.2284	1.504	0				1	-1	-1	1	1	-1	1	-1	1	-1
354	1948	H	H1	BM06875	H	H2	4	1	SC	LQD	0.501389	24.96	0.488889	24.83	45	0.44375	26.319				1.359	0				1	1	1	-1	1	1	1	1	-1	1
378	1950	H	H1	BM06875	H	H4	4	1	IVC	LQD	0.449306	23.31	0.433333	23.26	45	0.4	24.152	6.26007	3.59857	57.4845	0.842	1				1	1	1	1	1	1	1	1	1	1
368	1951	H	H1	BM06875	C	C4	4	0	IVC	LQD	0.445139	23.16	0.430556	23.18	45	0.394444	24.053	6.6308	3.8583	58.1875	0.893	0				1	-1	-1	1	1	-1	1	-1	1	-1
383	1970	H	H3	BM06886	C	C3	5	1	IVC	LQD	0.451389	27.8	0.434722	25.63	45	0.404861	26.045	6.86425	3.93175	57.2787	-1.755	0				1	-1	1	1	1	-1	1	-1	1	-1
385	1971	H	H3	BM06886	C	C1	5	1	SC	LQD	0.507639	23.55	0.493056	21.41	45	0.461806	17.049				-6.501	0				1	-1	1	-1	1	-1	1	-1	-1	-1
364	1972	H	H3	BM06886	C	C4	5	1	IVC	LQD	0.443056	24.29	0.428472	24.78	45	0.390972	25.323	7.3887	4.12495	55.8278	1.033	0				1	-1	1	1	1	-1	1	-1	1	-1
374	1973	H	H3	BM06886	H	H4	5	1	IVC	LQD	0.447917	24.31	0.432639	25.45	45	0.398611	27.114	7.26638	4.10688	56.5189	2.804	0				1	1	1	1	1	1	1	1	1	1
350	1975	C	C1	BM05968	H	H1	6	0	SC	LQD	0.500694	16.29	0.488194	14.9	45	0.442361	14.726				-1.564	0				-1	1	-1	-1	1	-1	-1	1	-1	-1
387	1977	C	C1	BM05968	C	C3	6	0	IVC	LQD	0.453472	17.64	0.436111	17.07	45	0.408333	18.582	6.19316	3.66041	59.1041	0.942	0				-1	-1	-1	1	1	1	-1	-1	1	1
386	1978	C	C1	BM05968	H	H3	6	1	IVC	LQD	0.452778	19.71	0.435417	18.76	45	0.406944	19.604	5.13073	2.87148	55.9663	-0.106	0				-1	1	1	1	1	-1	-1	1	1	-1
312	1979	C	C1	BM05968	H	H4	6	1	IVC	LQD	0.420833	22.29	0.40625	20.29	45	0.361111	19.74	4.76102	2.81077	59.0371	-2.55	0				-1	1	1	1	1	-1	-1	1	1	-1
389	1980	C	C1	BM05968	C	C2	6	0	SC	LQD	0.508333	17.95	0.49375	16.92	45	0.464583	14.889				-3.061	0				-1	-1	-1	-1	1	1	-1	-1	-1	1
362	1983	C	C3	BM06136	C	C4	5	1	IVC	LQD	0.442361	20.73	0.427083	20.38	45	0.389583	19.765	4.74328	2.83703	59.8116	-0.965	0				-1	-1	1	1	1	1	-1	-1	1	1
326	1984	C	C3	BM06136	H	H4	5	0	IVC	LQD	0.423611	20.08	0.409028	18.86	45	0.366667	20.389	5.58883	3.20933	57.424	0.309	0				-1	1	-1	1	1	-1	-1	1	1	-1
388	1985	C	C3	BM06136	C	C1	5	0	SC	LQD	0.508333	18.17	0.49375	16.9	45	0.463194	16.316				-1.854	0				-1	-1	-1	-1	1	1	-1	-1	-1	1
391	1987	H	H2	BM05634	H	H1	6	1	IVC	LQD	0.441667	27.08	0.429167	26.69	46	0.367361	26.914	8.4696	4.60485	54.3692	-0.166	0				1	1	1	1	1	1	1	1	1	1
393	1988	H	H2	BM05634	H	H3	6	0	SC	LQD	0.497222	20.4	0.509028	20.7	46	0.410417	20.276				-0.124	0				1	1	-1	-1	1	1	1	1	-1	1
399	1991	H	H2	BM05634	C	C3	6	0	SC	LQD	0.497917	20.15	0.509028	18.69	46	0.4125	17.881				-2.269	0				1	-1	-1	-1	1	-1	1	-1	-1	-1
401	1996	C	C3	BM05749	C	C4	5	0	SC	LQD	0.498611	17.88	0.509722	15.65	46	0.414583	17.397				-0.483	0				-1	-1	-1	-1	1	1	-1	-1	-1	1
372	1997	C	C3	BM05749	H	H4	5	0	SC	LQD	0.496528	16.84	0.507639	15.54	46	0.404861	16.043				-0.797	0				-1	1	-1	-1	1	-1	-1	1	-1	-1
405	2007	H	H2	BM05819	C	C1	5	1	IVC	LQD	0.444444	30.28	0.436111	30.18	46	0.379167	30.079	8.26537	4.60637	55.7309	-0.201	0				1	-1	1	1	1	-1	1	-1	1	-1
407	2008	H	H2	BM05819	C	C2	5	0	IVC	LQD	0.445139	26.4	0.4375	26.06	46	0.38125	27.902	7.48404	4.28254	57.2223	1.502	0				1	-1	-1	1	1	-1	1	-1	1	-1
409	2009	H	H2	BM05819	C	C4	5	1	IVC	LQD	0.446528	26.98	0.438889	27.22	46	0.383333	29.887				2.907	0				1	-1	1	1	1	-1	1	-1	1	-1
411	2010	H	H2	BM05819	C	C3	5	1	IVC	LQD	0.447222	26.34	0.439583	26.5	46	0.385417	28.321	7.42683	4.22558	56.8961	1.981	0				1	-1	1	1	1	-1	1	-1	1	-1
413	2011	H	H2	BM05819	H	H1	5	0	IVC	LQD	0.447917	23.14	0.440972	23.15	46	0.386806	22.951	5.99991	3.52241	58.7077	-0.189	0				1	1	-1	1	1	1	1	1	1	1
417	2056	H	H1	BM06513	C	C3	4	1	SC	LQD	0.500694	26.71	0.5125	26.76	46	0.425	26.931				0.221	0				1	-1	1	-1	1	-1	1	-1	-1	-1
419	2057	H	H1	BM06513	C	C2	4	1	SC	LQD	0.501389	23.47	0.5125	21.23	46	0.426389	20.165				-3.305	0				1	-1	1	-1	1	-1	1	-1	-1	-1
414	2058	H	H1	BM06513	H	H2	4	0	SC	LQD	0.500694	18.61	0.511806	17.71	46	0.422222	16.596				-2.014	0				1	1	-1	-1	1	1	1	1	-1	1
421	2059	C	C4	BM04951	C	C1	6	1	IVC	LQD	0.448611	28.26	0.442361	26.76	46	0.390278	26.63	5.88468	3.32243	56.459	-1.63	0				-1	-1	1	1	1	1	-1	-1	1	1
423	2060	C	C4	BM04951	C	C2	6	1	SC	LQD	0.502083	21.22	0.513889	20.37	46	0.430556	18.643				-2.577	0				-1	-1	1	-1	1	1	-1	-1	-1	1
425	2063	C	C4	BM04951	H	H1	6	1	IVC	LQD	0.45	26.71	0.444444	25.97	46	0.395139	27.086	6.9729	3.98065	57.0874	0.376	0				-1	1	1	1	1	-1	-1	1	1	-1
424	2070	C	C2	BM04641	C	C4	6	1	IVC	LQD	0.45	26.88	0.44375	24.92	46	0.392361	25.425	6.20654	3.56154	57.3837	-1.455	0				-1	-1	1	1	1	1	-1	-1	1	1
348	2072	C	C2	BM04641	H	H1	6	1	SC	LQD	0.495139	24.46	0.506944	22.11	46	0.4	21.002				-3.458	0				-1	1	1	-1	1	-1	-1	1	-1	-1
358	2073	C	C2	BM04641	H	H2	6	0	SC	LQD	0.495833	21.01	0.506944	19.25	46	0.402778	19.661				-1.349	0				-1	1	-1	-1	1	-1	-1	1	-1	-1
427	2074	C	C2	BM04641	H	H3	6	1	SC	LQD	0.503472	24.24	0.515972	22.47	46	0.434722	21.103				-3.137	0				-1	1	1	-1	1	-1	-1	1	-1	-1
392	2082	H	H1	BM06484	H	H2	5	1	SC	LQD	0.497222	24.65	0.508333	23.3	46	0.409028	21.893				-2.757	0				1	1	1	-1	1	1	1	1	-1	1
376	2087	C	C1	BM06439	H	H4	6	0	IVC	LQD	0.439583	18.84	0.427083	18.83	46	0.363194	18.804	5.47733	3.09533	56.5117	-0.036	0				-1	1	-1	1	1	-1	-1	1	1	-1
406	2088	C	C1	BM06439	H	H2	6	1	SC	LQD	0.499306	19.51	0.510417	18.85	46	0.41875	18.495				-1.015	0				-1	1	1	-1	1	-1	-1	1	-1	-1
437	2105	C	C4	BM06055	H	H3	2	1	IVC	LQD	0.463889	26.48	0.402083	24.21	47	0.363889	25.732	6.8379	3.9059	57.1213	-0.748	0				-1	1	1	1	1	-1	-1	1	1	-1
428	2110	H	H3	BM06613	C	C2	6	1	IVC	LQD	0.461806	20.99	0.4	19.68	47	0.359722	21.885	6.24993	3.37143	53.9435	0.895	1				1	-1	1	1	1	-1	1	-1	1	-1
443	2112	H	H3	BM06613	C	C4	6	1	IVC	LQD	0.467361	24.57	0.404861	23.33	47	0.370833	24.726	6.37868	3.54543	55.5825	0.156	1				1	-1	1	1	1	-1	1	-1	1	-1
447	2120	C	C2	BM06031	H	H3	6	1	IVC	LQD	0.469444	26.4	0.406944	26.15	47	0.375	25.704	6.14232	3.51332	57.1986	-0.696	0				-1	1	1	1	1	-1	-1	1	1	-1
449	2121	C	C2	BM06031	C	C3	6	0	SC	LQD	0.532639	19.4	0.464583	15.47	47	0.503472	16.819				-2.581	0				-1	-1	-1	-1	1	1	-1	-1	-1	1
451	2123	C	C4	BM06241	C	C2	5	1	IVC	LQD	0.471528	21.67	0.408333	21.89	47	0.379167	20.803	6.07015	3.3209	54.7087	-0.867	1				-1	-1	1	1	1	1	-1	-1	1	1
453	2125	C	C4	BM06241	C	C3	5	0	IVC	LQD	0.472222	20.17	0.409722	20.32	47	0.38125	21.16	7.01167	3.91642	55.8557	0.99	1				-1	-1	-1	1	1	1	-1	-1	1	1
459	2140	C	C4	BM05546	H	H4	5	0	IVC	LQD	0.475	19.91	0.411806	18.88	47	0.3875	18.899	4.90656	2.85306	58.1479	-1.011	0				-1	1	-1	1	1	-1	-1	1	1	-1
408	2149	C	C2	BM05266	H	H2	2	0	SC	LQD	0.523611	22.2	0.459028	20.41	47	0.480556	19.815				-2.385	0				-1	1	-1	-1	1	-1	-1	1	-1	-1
434	2150	C	C2	BM05266	H	H1	2	1	IVC	LQD	0.4625	22.74	0.401389	20.77	47	0.361111	21.59	5.15961	2.97936	57.7439	-1.15	0				-1	1	1	1	1	-1	-1	1	1	-1
440	2154	C	C3	BM06790	C	C4	7	1	IVC	LQD	0.465278	23.11	0.402778	21.78	47	0.365972	20.311	5.35056	3.04481	56.9064	-2.799	0				-1	-1	1	1	1	1	-1	-1	1	1
450	2158	C	C3	BM06790	C	C2	7	0	IVC	LQD	0.470139	18.03	0.407639	17.46	47	0.377083	17.683	5.02442	2.93242	58.3633	-0.347	0				-1	-1	-1	1	1	1	-1	-1	1	1
442	2160	C	C3	BM06790	H	H3	7	0	SC	LQD	0.529167	16.31	0.4625	14.94	47	0.494444	14.467				-1.843	0				-1	1	-1	-1	1	-1	-1	1	-1	-1
438	2175	H	H3	BM05866	C	C4	9	1	SC	LQD	0.526389	26.43	0.461111	24.79	47	0.490972	25.008				-1.422	0				1	-1	1	-1	1	-1	1	-1	-1	-1
448	2176	H	H3	BM05866	C	C2	9	1	SC	LQD	0.531944	23.18	0.463889	22.4	47	0.501389	21.902				-1.278	0				1	-1	1	-1	1	-1	1	-1	-1	-1
416	2177	H	H3	BM05866	H	H1	9	0	SC	LQD	0.525	22.4	0.459722	20.82	47	0.485417	17.357				-5.043	0				1	1	-1	-1	1	1	1	1	-1	1
473	2182	C	C3	BM06618	H	H3	6	1	IVC	LQD	0.420833	19.28	0.379167	18.48	48	0.3625	18.621	4.90416	2.81016	57.3016	-0.659	0				-1	1	1	1	1	-1	-1	1	1	-1
470	2189	H	H3	BM04825	H	H1	5	0	IVC	LQD	0.41875	20.55	0.377778	21.77	48	0.358333	24.558	7.12248	4.14723	58.2274	4.008	0	1			1	1	-1	1	1	1	1	1	1	1
460	2195	H	H4	BM06865	C	C4	5	0	SC	LQD	0.470833	18.38	0.448611	17.57	48	0.470833	18.487				0.107	0				1	-1	-1	-1	1	-1	1	-1	-1	-1
464	2196	H	H4	BM06865	C	C3	5	1	IVC	LQD	0.418056	19.7	0.376389	20.26	48	0.35625	21.832	6.48734	3.69509	56.9585	2.132	0				1	-1	1	1	1	-1	1	-1	1	-1
487	2197	H	H1	BM06796	C	C1	7	0	IVC	LQD	0.427083	21.36	0.384722	22.22	48	0.375	22.304	5.82892	3.43317	58.8989	0.944	0				1	-1	-1	1	1	-1	1	-1	1	-1
489	2199	H	H1	BM06796	C	C2	7	1	IVC	LQD	0.428472	27.77	0.385417	26.88	48	0.377083	29.216	7.21619	4.17719	57.8864	1.446	0				1	-1	1	1	1	-1	1	-1	1	-1
484	2201	H	H1	BM06796	H	H4	7	0	SC	LQD	0.475	20.77	0.451389	21.06	48	0.484028	21.571				0.801	0				1	1	-1	-1	1	1	1	1	-1	1
493	2202	H	H1	BM06796	C	C3	7	1	IVC	LQD	0.430556	24.63	0.386806	24.56	48	0.38125	25.969	6.48104	3.81154	58.8106	1.339	0				1	-1	1	1	1	-1	1	-1	1	-1
495	2204	C	C2	BM05639	H	H3	7	0	IVC	LQD	0.43125	21.55	0.3875	19.19	48	0.383333	19.887	5.00874	2.90174	57.9335	-1.663	0				-1	1	-1	1	1	-1	-1	1	1	-1
452	2209	C	C2	BM05639	C	C4	7	1	SC	LQD	0.46875	22.31	0.447917	20.38	48	0.465972	15.769				-6.541	0				-1	-1	1	-1	1	1	-1	-1	-1	1
497	2210	C	C2	BM05639	C	C1	7	0	IVC	LQD	0.432639	20.34	0.388889	18.85	48	0.386111	20.288	6.12846	3.50171	57.1385	-0.052	0				-1	-1	-1	1	1	1	-1	-1	1	1
482	2218	C	C1	BM06744	H	H3	5	1	SC	LQD	0.473611	22.15	0.451389	20.86	48	0.48125	17.249				-4.901	0				-1	1	1	-1	1	-1	-1	1	-1	-1
496	2223	H	H3	BM05184	C	C2	6	0	SC	LQD	0.477083	19.24	0.453472	18.48	48	0.491667	17.826				-1.414	0				1	-1	-1	-1	1	-1	1	-1	-1	-1
492	2226	H	H3	BM05184	H	H1	6	1	IVC	LQD	0.429861	24.89	0.386111	23.37	48	0.379167	22.924	5.43758	3.09933	56.9983	-1.966	0				1	1	1	1	1	1	1	1	1	1
499	2240	C	C1	BM05796	H	H3	5	0	IVC	LQD	0.405556	15.73	0.33125	14.69	49	0.369444	15.388	4.35798	2.50023	57.3713	-0.342	0				-1	1	-1	1	1	-1	-1	1	1	-1
501	2241	C	C1	BM05796	C	C2	5	0	IVC	LQD	0.40625	17.38	0.332639	15.44	49	0.371528	16.378	5.24969	3.01969	57.5213	-1.002	0				-1	-1	-1	1	1	1	-1	-1	1	1
503	2243	C	C1	BM05796	C	C3	5	1	SC	LQD	0.458333	19	0.490278	18.09	49	0.438194	14.459				-4.541	0				-1	-1	1	-1	1	1	-1	-1	-1	1
502	2250	C	C2	BM05674	C	C1	6	0	SC	LQD	0.457639	19.41	0.489583	18.05	49	0.436111	16.984				-2.426	0				-1	-1	-1	-1	1	1	-1	-1	-1	1
504	2252	C	C3	BM05850	C	C1	3	1	IVC	LQD	0.406944	16.05	0.333333	15.31	49	0.373611	15.268	5.54964	2.95464	53.2402	-0.782	1				-1	-1	1	1	1	1	-1	-1	1	1
500	2256	H	H3	BM05198	C	C1	6	0	SC	LQD	0.456944	19.72	0.488889	18.27	49	0.434028	17.598				-2.122	0				1	-1	-1	-1	1	-1	1	-1	-1	-1
507	2257	H	H3	BM05198	C	C2	6	0	IVC	LQD	0.409028	18.77	0.336111	19.42	49	0.377778	19.871	5.89702	3.32402	56.3678	1.101	0				1	-1	-1	1	1	-1	1	-1	1	-1
508	2279	C	C2	BM06769	H	H3	4	0	SC	LQD	0.493056	22.95	0.465972	19.65	50	0.438194	19.774				-3.176	0				-1	1	-1	-1	1	-1	-1	1	-1	-1
513	2290	H	H2	BM05330	C	C3	6	0	IVC	LQD	0.343056	25.69	0.340972	24.94	52	0.384028	25.771	6.62051	3.80276	57.439	0.081	0				1	-1	-1	1	1	-1	1	-1	1	-1
515	2303	C	C3	BM04219	H	H4	6	0	SC	LQD	0.445139	19.35	0.450694	18.33	53	0.444444	12.59				-6.76	0	1			-1	1	-1	-1	1	-1	-1	1	-1	-1
521	2314	H	H4	BM05916	C	C1	6	0	SC	LQD	0.446528	22.99	0.451389	22.88	53	0.448611	20.659				-2.331	0				1	-1	-1	-1	1	-1	1	-1	-1	-1
510	2315	H	H3	BM06812	H	H2	3	1	SC	LQD	0.442361	19.72	0.449306	18.84	53	0.432639	16.653				-3.067	0				1	1	1	-1	1	1	1	1	-1	1
523	2317	H	H3	BM06812	C	C3	3	0	SC	LQD	0.447917	19.99	0.452083	18.79	53	0.556944	18.049				-1.941	0				1	-1	-1	-1	1	-1	1	-1	-1	-1
529	2333	C	C1	BM06437	C	C4	5	1	SC	LQD	0.45625	16.71	0.451389	15.99	54	0.450694	14.697				-2.013	0				-1	-1	1	-1	1	1	-1	-1	-1	1
528	2335	C	C1	BM06437	C	C3	5	0	SC	LQD	0.454861	14.84	0.448611	14.47	54	0.447222	12.932				-1.908	0				-1	-1	-1	-1	1	1	-1	-1	-1	1
524	2340	C	C3	BM06103	H	H3	5	0	IVC	LQD	0.347222	17	0.357639	16.01	54	0.379861	16.536	4.23353	2.53578	59.8976	-0.464	0				-1	1	-1	1	1	-1	-1	1	1	-1
531	2342	C	C3	BM06103	C	C4	5	1	IVC	LQD	0.351389	22.78	0.361806	21.98	54	0.390278	23.014	5.86229	3.35554	57.2394	0.234	0				-1	-1	1	1	1	1	-1	-1	1	1
535	2411	C	C3	BM04517	H	H2	8	0	SC	LQD	0.44375	17.28	0.444444	15.44	60	0.431944	13.115				-4.165	0				-1	1	-1	-1	1	-1	-1	1	-1	-1
541	2416	C	C3	BM04517	H	H4	8	1	IVC	LQD	0.361806	20.22	0.361806	20.03	60	0.410417	20.057	5.49397	3.31747	60.3838	-0.163	0				-1	1	1	1	1	-1	-1	1	1	-1
543	2417	C	C3	BM04517	H	H1	8	1	IVC	LQD	0.363194	19.1	0.361806	17.31	60	0.413889	16.676	4.91853	2.95603	60.0999	-2.424	0				-1	1	1	1	1	-1	-1	1	1	-1
540	2419	C	C2	BM06854	C	C3	6	0	IVC	LQD	0.360417	22.17	0.361111	21.1	60	0.406944	21.105	5.52594	3.15594	57.1114	-1.065	0				-1	-1	-1	1	1	1	-1	-1	1	1
549	2422	C	C2	BM06854	H	H4	6	1	SC	LQD	0.446528	23.06	0.446528	19.95	60	0.439583	19.216				-3.844	0				-1	1	1	-1	1	-1	-1	1	-1	-1
553	2441	H	H2	BM06468	H	H4	6	1	SC	LQD	0.45	22.76	0.453472	22.19	61	0.45	21.836				-0.924	0				1	1	1	-1	1	1	1	1	-1	1
536	2442	H	H2	BM06468	C	C3	6	0	IVC	LQD	0.367361	19.33	0.388889	20.07	61	0.405556	20.387	6.03573	3.46448	57.3995	1.057	0				1	-1	-1	1	1	-1	1	-1	1	-1
546	2468	H	H1	BM06326	C	C2	4	0	SC	LQD	0.448611	18.68	0.452083	17.32	61	0.441667	17.305				-1.375	0				1	-1	-1	-1	1	-1	1	-1	-1	-1
538	2478	H	H3	BM05865	C	C3	5	1	IVC	LQD	0.36875	24.5	0.394444	25.75	61	0.409028	25.985	7.25353	4.01653	55.3735	1.485	0				1	-1	1	1	1	-1	1	-1	1	-1
552	2482	H	H3	BM05865	C	C2	5	0	IVC	LQD	0.370139	25.5	0.397222	23.61	61	0.415972	25.16	7.31402	4.30677	58.8838	-0.34	0				1	-1	-1	1	1	-1	1	-1	1	-1
542	2484	H	H4	BM04827	C	C3	4	1	SC	LQD	0.447917	23.35	0.450694	22.76	61	0.432639	20.62				-2.73	0				1	-1	1	-1	1	-1	1	-1	-1	-1
562	2579	H	H4	BM06347	H	H2	6	1	IVC	LQD	0.379167	26.06	0.400694	26.22	62	0.40625	26.354	7.40994	3.94719	53.2688	0.294	1				1	1	1	1	1	1	1	1	1	1
565	2602	H	H4	BM06362	C	C1	4	0	IVC	LQD	0.382639	19.98	0.402778	19.74	62	0.416667	20.587	6.12882	3.43557	56.0559	0.607	1				1	-1	-1	1	1	-1	1	-1	1	-1
567	2610	H	H4	BM05192	H	H1	4	1	IVC	LQD	0.383333	29.58	0.404167	28.67	62	0.421528	29.401	8.39059	4.46634	53.2304	-0.179	0				1	1	1	1	1	1	1	1	1	1
571	2622	H	H3	BM05199	C	C1	6	1	IVC	LQD	0.384722	20.55	0.404861	20.29	62	0.427083	20.84	6.24457	3.56232	57.0467	0.29	0				1	-1	1	1	1	-1	1	-1	1	-1
575	2633	C	C2	BM06151	H	H2	4	1	IVC	LQD	0.369444	19.97	0.385417	19.98	63	0.393056	18.894	4.82577	2.85277	59.1153	-1.076	0				-1	1	1	1	1	-1	-1	1	1	-1
577	2634	C	C2	BM06151	H	H1	4	0	SC	LQD	0.465972	22.98	0.44375	21.3	63	0.488889	18.567				-4.413	0				-1	1	-1	-1	1	-1	-1	1	-1	-1
589	2651	H	H3	BM04844	H	H2	7	1	IVC	LQD	0.377778	23.85	0.391667	23.44	63	0.404861	24.645	6.69632	3.81757	57.01	0.795	0				1	1	1	1	1	1	1	1	1	1
591	2652	H	H3	BM04844	C	C3	7	1	SC	LQD	0.475	20.92	0.447222	19.93	63	0.502083	18.065				-2.855	0				1	-1	1	-1	1	-1	1	-1	-1	-1
593	2653	H	H3	BM04844	C	C1	7	0	IVC	LQD	0.38125	17.54	0.39375	16.64	63	0.409722	16.655	4.78248	2.76773	57.8723	-0.885	0				1	-1	-1	1	1	-1	1	-1	1	-1
597	2661	C	C4	BM04161	H	H2	6	0	SC	LQD	0.475694	18.13	0.447917	17.2	63	0.504167	17.098				-1.032	0				-1	1	-1	-1	1	-1	-1	1	-1	-1
599	2663	C	C4	BM04161	H	H3	6	0	SC	LQD	0.476389	21.1	0.447917	19.31	63	0.506944	16.258				-4.842	0				-1	1	-1	-1	1	-1	-1	1	-1	-1
570	2664	C	C4	BM04161	H	H4	6	0	IVC	LQD	0.365972	20.37	0.384028	19.79	63	0.390972	20.485	5.66717	3.25442	57.4259	0.115	0				-1	1	-1	1	1	-1	-1	1	1	-1
607	2702	H	H2	BM05803	C	C1	6	0	IVC	LQD	0.386806	23.05	0.398611	23.38	63	0.420139	22.972	6.11278	3.50278	57.3026	-0.078	0				1	-1	-1	1	1	-1	1	-1	1	-1
609	2703	C	C1	BM06763	H	H4	5	1	SC	LQD	0.479861	22.11	0.45	20.28	63	0.5125	19.597				-2.513	0				-1	1	1	-1	1	-1	-1	1	-1	-1
608	2704	C	C1	BM06763	H	H2	5	0	SC	LQD	0.478472	16.69	0.449306	15.6	63	0.510417	15.131				-1.559	0				-1	1	-1	-1	1	-1	-1	1	-1	-1
564	2713	H	H1	BM06735	H	H4	6	1	SC	LQD	0.461806	22.41	0.440972	21.47	63	0.478472	20.5				-1.91	0				1	1	1	-1	1	1	1	1	-1	1
613	2716	H	H1	BM06735	C	C1	6	0	SC	LQD	0.480556	22.78	0.450694	21.14	63	0.515278	20.035				-2.745	0				1	-1	-1	-1	1	-1	1	-1	-1	-1
606	2718	H	H1	BM06735	H	H3	6	1	SC	LQD	0.477778	21.78	0.448611	20.9	63	0.509028	19.893				-1.887	0				1	1	1	-1	1	1	1	1	-1	1
621	2728	H	H2	BM05812	H	H1	5	1	SC	LQD	0.484028	22.89	0.452083	21.32	63	0.522222	23.554				0.664	0				1	1	1	-1	1	1	1	1	-1	1
586	2738	H	H4	BM06350	C	C4	6	1	IVC	LQD	0.374306	23.88	0.389583	23.55	63	0.400694	25.074	7.23356	4.13806	57.2064	1.194	0				1	-1	1	1	1	-1	1	-1	1	-1
580	2740	H	H4	BM06350	C	C2	6	1	IVC	LQD	0.370833	19.78	0.386111	19.67	63	0.394444	22.139	6.33332	3.71332	58.6315	2.359	0				1	-1	1	1	1	-1	1	-1	1	-1
623	2742	H	H4	BM06350	C	C3	6	1	SC	LQD	0.484722	22.14	0.452778	21.68	63	0.524306	21.089				-1.051	0				1	-1	1	-1	1	-1	1	-1	-1	-1
568	2759	H	H1	BM06560	H	H4	7	1	SC	LQD	0.463194	28.79	0.442361	28.2	63	0.482639	25.07				-3.72	0				1	1	1	-1	1	1	1	1	-1	1
624	2766	C	C3	BM06002	H	H4	5	1	IVC	LQD	0.394444	19.91	0.402778	19.09	63	0.430556	18.346	4.84923	2.84748	58.7203	-1.564	0				-1	1	1	1	1	-1	-1	1	1	-1
584	2768	C	C3	BM06002	C	C4	5	0	SC	LQD	0.467361	17.14	0.445833	15.58	63	0.496528	14.386				-2.754	0				-1	-1	-1	-1	1	1	-1	-1	-1	1
625	2776	C	C4	BM06536	C	C1	6	0	SC	LQD	0.459028	18.95	0.463194	17.19	64	0.48125	14.608				-4.342	0				-1	-1	-1	-1	1	1	-1	-1	-1	1
631	2800	H	H2	BM06491	H	H1	5	0	SC	LQD	0.460417	20.2	0.464583	19.31	64	0.486806	20.633				0.433	0				1	1	-1	-1	1	1	1	1	-1	1
633	2802	H	H2	BM06491	C	C4	5	1	IVC	LQD	0.369444	24.48	0.370139	23.46	64	0.408333	25.746	6.84052	3.86102	56.4433	1.266	0				1	-1	1	1	1	-1	1	-1	1	-1
602	2812	C	C1	BM04482	H	H3	6	1	SC	LQD	0.456944	18.92	0.461806	17.08	64	0.475694	16.074				-2.846	0				-1	1	1	-1	1	-1	-1	1	-1	-1
588	2828	H	H1	BM06048	H	H3	5	1	SC	LQD	0.454861	28.71	0.460417	26.11	64	0.472222	27.282				-1.428	0				1	1	1	-1	1	1	1	1	-1	1
641	2849	C	C4	BM04231	H	H2	4	0	SC	LQD	0.463889	18.07	0.467361	16.16	64	0.491667	15.213				-2.857	1				-1	1	-1	-1	1	-1	-1	1	-1	-1
640	2852	H	H4	BM06388	C	C4	7	0	IVC	LQD	0.372222	23.48	0.371528	25.22	64	0.4125	27.442	8.93016	4.90116	54.8832	3.962	0				1	-1	-1	1	1	-1	1	-1	1	-1
649	2859	H	H2	BM05689	H	H4	5	1	IVC	LQD	0.377778	26.11	0.375694	26.23	64	0.422222	26.175	7.36297	4.10897	55.8059	0.065	0				1	1	1	1	1	1	1	1	1	1
642	2861	H	H2	BM05689	C	C4	5	0	IVC	LQD	0.373611	28.52	0.372917	27.98	64	0.415278	28.888	8.54812	4.66587	54.5836	0.368	0				1	-1	-1	1	1	-1	1	-1	1	-1
655	2876	C	C3	BM06712	C	C1	4	1	IVC	LQD	0.379861	23.49	0.377778	22.24	64	0.427778	22.925	6.0852	3.4067	55.9834	-0.565	0				-1	-1	1	1	1	1	-1	-1	1	1
620	2878	C	C3	BM06712	H	H2	4	1	IVC	LQD	0.365972	20.98	0.367361	20.41	64	0.401389	20.813	6.24633	3.61783	57.9193	-0.167	0				-1	1	1	1	1	-1	-1	1	1	-1
646	2880	H	H2	BM06329	H	H4	3	1	SC	LQD	0.464583	29.68	0.467361	27.94	64	0.49375	28.294				-1.386	0				1	1	1	-1	1	1	1	1	-1	1
638	2896	H	H4	BM06563	H	H1	5	1	IVC	LQD	0.370833	23.87	0.370833	23.69	64	0.410417	24.878	7.97046	4.43921	55.6958	1.008	0				1	1	1	1	1	1	1	1	1	1
658	2919	C	C1	BM06688	H	H2	4	1	IVC	LQD	0.38125	19.11	0.379167	17.94	64	0.429861	17.614	4.94989	2.81364	56.8425	-1.496	0				-1	1	1	1	1	-1	-1	1	1	-1
614	2921	C	C1	BM06688	H	H1	4	0	IVC	LQD	0.365278	19.65	0.366667	18.56	64	0.399306	18.453	5.08457	2.94057	57.8332	-1.197	0				-1	1	-1	1	1	-1	-1	1	1	-1
626	2922	C	C1	BM06688	C	C4	4	0	IVC	LQD	0.367361	20.44	0.368056	20.14	64	0.403472	19.108	5.3324	2.99815	56.2252	-1.332	0				-1	-1	-1	1	1	1	-1	-1	1	1
661	2931	C	C3	BM05303	H	H1	5	1	IVC	LQD	0.350694	22.23	0.35625	20.78	65	0.401389	20.746	4.89668	2.82543	57.701	-1.484	0				-1	1	1	1	1	-1	-1	1	1	-1
644	2932	C	C3	BM05303	C	C4	5	1	SC	LQD	0.471528	19.41	0.482639	17.77	65	0.435417	16.707				-2.703	0				-1	-1	1	-1	1	1	-1	-1	-1	1
667	2952	C	C1	BM05851	H	H4	6	0	SC	LQD	0.477778	16.64	0.4875	15.42	65	0.449306	14.712				-1.928	0				-1	1	-1	-1	1	-1	-1	1	-1	-1
654	2957	C	C1	BM05851	H	H2	6	1	SC	LQD	0.472917	17.82	0.484028	16.56	65	0.438889	15.536				-2.284	0				-1	1	1	-1	1	-1	-1	1	-1	-1
672	2986	H	H2	BM05924	C	C1	6	0	IVC	LQD	0.35625	24.06	0.361111	23.61	65	0.410417	24.366	6.93436	3.95936	57.0977	0.306	0				1	-1	-1	1	1	-1	1	-1	1	-1
675	2987	H	H2	BM05924	C	C2	6	1	IVC	LQD	0.356944	24.26	0.361806	24.07	65	0.413194	25.297	7.72493	4.36318	56.4818	1.037	0				1	-1	1	1	1	-1	1	-1	1	-1
677	2992	H	H1	BM05935	H	H4	6	0	IVC	LQD	0.358333	22.94	0.363194	23.36	65	0.415278	23.294	5.83472	3.38322	57.9843	0.354	0				1	1	-1	1	1	1	1	1	1	1
632	2993	H	H1	BM05935	H	H2	6	0	IVC	LQD	0.345833	23.92	0.351389	23.06	65	0.390972	22.103	4.75912	2.75262	57.8389	-1.817	0				1	1	-1	1	1	1	1	1	1	1
664	2994	H	H1	BM05935	C	C4	6	1	IVC	LQD	0.351389	26.16	0.356944	25.73	65	0.404167	27.256	7.37861	4.19711	56.8821	1.096	0				1	-1	1	1	1	-1	1	-1	1	-1
668	2998	H	H4	BM06480	C	C1	6	0	IVC	LQD	0.353472	21.34	0.359028	20.68	65	0.406944	20.466	7.05562	3.73162	52.8886	-0.874	0				1	-1	-1	1	1	-1	1	-1	1	-1
666	3000	H	H4	BM06480	C	C4	6	1	SC	LQD	0.476389	25.71	0.486806	24.99	65	0.446528	23.118				-2.592	0				1	-1	1	-1	1	-1	1	-1	-1	-1
650	3001	H	H4	BM06480	H	H2	6	1	SC	LQD	0.472222	26.44	0.483333	24.62	65	0.436806	23.578				-2.862	0				1	1	1	-1	1	1	1	1	-1	1
636	3016	H	H1	BM06513	C	C1	5	0	IVC	LQD	0.346528	22.07	0.352778	21.54	65	0.392361	22.288	5.33628	3.10203	58.131	0.218	0				1	-1	-1	1	1	-1	1	-1	1	-1
683	3018	H	H1	BM06513	C	C4	5	1	IVC	LQD	0.360417	26.07	0.365278	24.58	65	0.419444	24.333	6.10331	3.50431	57.4165	-1.737	0				1	-1	1	1	1	-1	1	-1	1	-1
680	3026	C	C2	BM05266	H	H4	5	1	IVC	LQD	0.359722	25.8	0.363889	23.73	65	0.417361	23.732	6.90742	3.88942	56.3079	-2.068	0				-1	1	1	1	1	-1	-1	1	1	-1
687	3027	C	C2	BM05266	C	C3	5	1	IVC	LQD	0.3625	23.25	0.366667	21.8	65	0.423611	21.964	5.22394	2.90344	55.5795	-1.286	0				-1	-1	1	1	1	1	-1	-1	1	1
691	3030	H	H4	BM06503	H	H2	4	0	IVC	LQD	0.34375	20.81	0.35625	19.82	66	0.384028	20.992	6.21342	3.48917	56.1554	0.182	0				1	1	-1	1	1	1	1	1	1	1
694	3051	C	C2	BM05737	H	H4	7	0	IVC	LQD	0.344444	24.38	0.356944	23.51	66	0.386111	22.488	5.54122	3.20122	57.771	-1.892	0				-1	1	-1	1	1	-1	-1	1	1	-1
690	3059	C	C4	BM06241	H	H4	6	1	IVC	LQD	0.343056	22.34	0.354861	21.32	66	0.38125	19.065	4.18571	2.43571	58.1911	-3.275	1				-1	1	1	1	1	-1	-1	1	1	-1
684	3064	C	C4	BM06229	H	H1	5	1	SC	LQD	0.493056	26.09	0.484028	23.44	66	0.444444	20.874				-5.216	0				-1	1	1	-1	1	-1	-1	1	-1	-1
701	3073	C	C3	BM05957	H	H1	7	0	IVC	LQD	0.348611	17.92	0.361111	15.93	66	0.394444	15.821	4.46142	2.55817	57.3398	-2.099	0				-1	1	-1	1	1	-1	-1	1	1	-1
705	3119	H	H4	BM06791	H	H3	4	0	IVC	LQD	0.346528	22.3	0.34375	22.08	67	0.395833	22.847	5.56587	3.25637	58.506	0.547	0				1	1	-1	1	1	1	1	1	1	1
707	3121	H	H4	BM06791	H	H1	4	1	SC	LQD	0.492361	22.13	0.451389	22.24	67	0.469444	18.515				-3.615	0				1	1	1	-1	1	1	1	1	-1	1
709	3164	H	H2	BM05819	H	H3	6	1	IVC	LQD	0.348611	26.15	0.345833	25.19	67	0.403472	27.216	6.72874	3.90599	58.0494	1.066	0				1	1	1	1	1	1	1	1	1	1
708	3174	H	H1	BM06484	H	H4	5	1	IVC	LQD	0.347222	25.72	0.345139	25.76	67	0.4	27.873	7.30984	4.23659	57.9573	2.153	0				1	1	1	1	1	1	1	1	1	1
711	3194	C	C4	BM06055	H	H1	4	0	IVC	LQD	0.35	23.08	0.346528	22.25	67	0.407639	22.921	6.64821	3.89096	58.5265	-0.159	0				-1	1	-1	1	1	-1	-1	1	1	-1
719	3258	C	C4	BM06696	C	C2	5	0	SC	LQD	0.458333	21.66	0.450694	19.37	68	0.475694	15.066				-6.594	0				-1	-1	-1	-1	1	1	-1	-1	-1	1
721	3286	H	H3	BM05838	H	H4	6	0	IVC	LQD	0.339583	21.81	0.35	21.09	68	0.379861	21.901	6.10998	3.50498	57.3648	0.091	0				1	1	-1	1	1	1	1	1	1	1
710	3290	H	H3	BM05838	H	H2	6	1	SC	LQD	0.454861	23.72	0.448611	23.2	68	0.465278	21.264				-2.456	0				1	1	1	-1	1	1	1	1	-1	1
712	3292	H	H1	BM06558	C	C4	4	0	SC	LQD	0.455556	23.57	0.449306	22.53	68	0.46875	22.766				-0.804	0				1	-1	-1	-1	1	-1	1	-1	-1	-1
722	3315	H	H4	BM06865	H	H3	4	0	SC	LQD	0.459028	21.06	0.451389	19.97	68	0.479861	21.62				0.56	0				1	1	-1	-1	1	1	1	1	-1	1
727	3316	H	H4	BM06865	H	H2	4	0	SC	LQD	0.461111	20.34	0.453472	19.39	68	0.486806	15.984				-4.356	0				1	1	-1	-1	1	1	1	1	-1	1
731	3348	H	H2	BM05332	C	C4	6	1	SC	LQD	0.458333	22.77	0.48125	21.5	69	0.438889	21.119				-1.651	0				1	-1	1	-1	1	-1	1	-1	-1	-1
735	3349	H	H2	BM05332	H	H3	6	0	SC	LQD	0.460417	22.06	0.482639	21.5	69	0.447222	22.97				0.91	0				1	1	-1	-1	1	1	1	1	-1	1
728	3351	H	H2	BM05332	H	H4	6	0	IVC	LQD	0.341667	22.06	0.350694	21.16	69	0.403472	22.039	6.31208	3.65833	57.9576	-0.021	0				1	1	-1	1	1	1	1	1	1	1
732	3361	C	C4	BM05546	H	H2	5	1	IVC	LQD	0.345139	22.22	0.352778	21.09	69	0.411806	20.365	4.26747	2.37622	55.6822	-1.855	1				-1	1	1	1	1	-1	-1	1	1	-1
720	3366	C	C2	BM06859	C	C4	7	0	IVC	LQD	0.339583	21.52	0.348611	19.65	69	0.395833	20.544	5.06129	2.89979	57.2935	-0.976	0				-1	-1	-1	1	1	1	-1	-1	1	1
718	3373	H	H2	BM05856	C	C4	1	0	SC	LQD	0.456944	17.56	0.480556	17.05	69	0.43125	15.242				-2.318	0				1	-1	-1	-1	1	-1	1	-1	-1	-1
736	3384	H	H3	BM06613	H	H2	4	0	IVC	LQD	0.345833	21.83	0.345833	20.89	70	0.418056	21.588	6.87179	3.74904	54.557	-0.242	1				1	1	-1	1	1	1	1	1	1	1
741	3399	H	H1	BM05843	C	C1	3	1	IVC	LQD	0.342361	24.46	0.369444	24.89	71	0.408333	25.986	6.71993	3.91418	58.2473	1.526	0				1	-1	1	1	1	-1	1	-1	1	-1
743	3400	H	H1	BM05843	C	C3	3	0	IVC	LQD	0.343056	20.09	0.370139	20.37	71	0.4125	21.804	6.43991	3.69991	57.4528	1.714	0				1	-1	-1	1	1	-1	1	-1	1	-1
738	3401	H	H1	BM05843	H	H3	3	1	IVC	LQD	0.340972	25.5	0.368056	25.33	71	0.404167	26.466	7.02879	4.03379	57.3895	0.966	0				1	1	1	1	1	1	1	1	1	1
748	3421	C	C3	BM06618	C	C2	5	1	IVC	LQD	0.344444	20.1	0.371528	18.72	71	0.415972	19.458	5.12186	2.96761	57.9401	-0.642	0				-1	-1	1	1	1	1	-1	-1	1	1
740	3423	C	C3	BM06618	H	H3	5	1	SC	LQD	0.480556	21.95	0.45	21.15	71	0.451389	20.015				-1.935	0				-1	1	1	-1	1	-1	-1	1	-1	-1
746	3433	C	C1	BM05525	C	C2	7	1	IVC	LQD	0.361806	18.23	0.393056	16.77	72	0.408333	17.154	4.49563	2.49963	55.6013	-1.076	0				-1	-1	1	1	1	1	-1	-1	1	1
751	3434	C	C1	BM05525	C	C3	7	0	IVC	LQD	0.363889	17.66	0.395833	16.93	72	0.417361	16.947	5.3946	3.08585	57.2026	-0.713	0				-1	-1	-1	1	1	1	-1	-1	1	1
750	3435	C	C1	BM05525	C	C2	7	0	IVC	LQD	0.363194	17.3	0.394444	15.31	72	0.413194	17.056	4.8151	2.7801	57.7371	-0.244	0				-1	-1	-1	1	1	1	-1	-1	1	1
742	3436	C	C1	BM05525	H	H1	7	1	SC	LQD	0.452778	20.85	0.444444	16.99	72	0.430556	14.533				-6.317	0				-1	1	1	-1	1	-1	-1	1	-1	-1
755	3441	C	C2	BM05639	C	C3	7	0	IVC	LQD	0.366667	19.05	0.397222	17.36	72	0.426389	17.785	4.91959	2.79084	56.7291	-1.265	0				-1	-1	-1	1	1	1	-1	-1	1	1
753	3443	C	C2	BM05639	H	H2	7	1	IVC	LQD	0.365278	24.7	0.396528	23.35	72	0.421528	24.86	6.89729	3.93329	57.0266	0.16	0				-1	1	1	1	1	-1	-1	1	1	-1
757	3452	C	C3	BM06103	H	H2	7	1	SC	LQD	0.448611	19.88	0.463889	18.91	73	0.441667	18.823				-1.057	0				-1	1	1	-1	1	-1	-1	1	-1	-1
756	3453	C	C3	BM06103	C	C2	7	0	SC	LQD	0.447917	18.19	0.463889	17.59	73	0.438194	17.076				-1.114	0				-1	-1	-1	-1	1	1	-1	-1	-1	1
754	3461	H	H2	BM05330	C	C2	6	1	SC	LQD	0.446528	28.7	0.463194	26.72	73	0.433333	26.937				-1.763	0				1	-1	1	-1	1	-1	1	-1	-1	-1
761	3462	H	H2	BM05330	C	C1	6	0	SC	LQD	0.449306	23.38	0.464583	22.17	73	0.445833	22.35				-1.03	0				1	-1	-1	-1	1	-1	1	-1	-1	-1
766	3492	C	C3	BM04219	C	C1	7	1	SC	LQD	0.467361	24.45	0.44375	23.44	74	0.465278	21.982				-2.468	0				-1	-1	1	-1	1	1	-1	-1	-1	1
768	3503	H	H1	BM05826	C	C3	5	1	IVC	LQD	0.391667	24.54	0.384722	24.99	75	0.405556	25.813	6.62578	3.79653	57.2993	1.273	0				1	-1	1	1	1	-1	1	-1	1	-1
764	3506	H	H1	BM05826	H	H3	5	0	IVC	LQD	0.390278	22.42	0.384028	22.19	75	0.402083	23.125	6.20288	3.53338	56.9636	0.705	0				1	1	-1	1	1	1	1	1	1	1
770	3511	C	C4	BM04982	C	C3	5	0	IVC	LQD	0.392361	19.03	0.385417	19.53	75	0.409722	18.932	5.92234	3.20209	54.068	-0.098	1				-1	-1	-1	1	1	1	-1	-1	1	1
779	3544	H	H4	BM06872	H	H2	7	1	SC	LQD	0.444444	18.08	0.45625	17.97	76	0.43125	18.936				0.856	0				1	1	1	-1	1	1	1	1	-1	1
778	3549	H	H4	BM06872	C	C4	7	1	IVC	LQD	0.389583	21.87	0.379861	22	76	0.419444	23.968	6.49682	3.74507	57.6447	2.098	0				1	-1	1	1	1	-1	1	-1	1	-1
783	3566	H	H2	BM05907	H	H4	7	0	SC	LQD	0.458333	20.3	0.463889	18.52	77	0.427778	16.797				-3.503	0				1	1	-1	-1	1	1	1	1	-1	1
785	3568	H	H2	BM05907	H	H3	7	1	IVC	LQD	0.385417	21.73	0.390972	20.54	77	0.423611	21.447	6.14542	3.48667	56.7361	-0.283	0				1	1	1	1	1	1	1	1	1	1
780	3569	H	H2	BM05907	H	H4	7	1	IVC	LQD	0.38125	22.74	0.388194	22.16	77	0.410417	21.762	6.71253	3.65853	54.503	-0.978	0				1	1	1	1	1	1	1	1	1	1
787	3580	H	H4	BM05929	H	H3	2	1	SC	LQD	0.459028	24.34	0.464583	22.9	77	0.43125	24.842				0.502	0		1		1	1	1	-1	1	1	1	1	-1	1
789	3597	C	C4	BM04056	C	C3	6	1	SC	LQD	0.467361	26	0.445833	22.48	78	0.475	18.458				-7.542	0				-1	-1	1	-1	1	1	-1	-1	-1	1
791	3598	C	C4	BM04056	H	H3	6	0	IVC	LQD	0.394444	22.04	0.372222	21.21	78	0.433333	21.493	6.28507	3.70557	58.9583	-0.547	0				-1	1	-1	1	1	-1	-1	1	1	-1
793	3601	C	C4	BM04056	C	C2	6	0	IVC	LQD	0.395833	21.96	0.373611	20.95	78	0.4375	20.425	5.9165	3.395	57.3819	-1.535	0				-1	-1	-1	1	1	1	-1	-1	1	1
797	3603	C	C3	BM05651	C	C2	5	1	SC	LQD	0.470139	22.04	0.447917	21.04	78	0.486806	19.11				-2.93	0				-1	-1	1	-1	1	1	-1	-1	-1	1
796	3615	H	H3	BM06811	C	C3	5	1	SC	LQD	0.46875	21.23	0.447222	20.29	78	0.482639	17.263				-3.967	0				1	-1	1	-1	1	-1	1	-1	-1	-1
792	3616	H	H3	BM06811	C	C4	5	0	SC	LQD	0.468056	21.81	0.446528	20.32	78	0.479167	19.175				-2.635	0				1	-1	-1	-1	1	-1	1	-1	-1	-1
800	3622	H	H3	BM06367	C	C3	4	0	IVC	LQD	0.376389	25.3	0.379861	23.65	79	0.438889	25.94	7.75319	4.35969	56.2309	0.64	0				1	-1	-1	1	1	-1	1	-1	1	-1
803	3623	H	H3	BM06367	H	H4	4	0	SC	LQD	0.451389	23.7	0.441667	21.81	79	0.457639	19.018				-4.682	0				1	1	-1	-1	1	1	1	1	-1	1
798	3640	C	C2	BM06306	C	C3	6	1	IVC	LQD	0.375694	24.67	0.378472	22.97	79	0.435417	22.205	5.46012	2.93462	53.7465	-2.465	0				-1	-1	1	1	1	1	-1	-1	1	1
794	3644	C	C2	BM06306	C	C4	6	0	SC	LQD	0.449306	19.1	0.440972	17.72	79	0.450694	13.675				-5.425	0				-1	-1	-1	-1	1	1	-1	-1	-1	1
809	3655	H	H1	BM05271	H	H3	6	0	SC	LQD	0.444444	22.17	0.459028	20.7	80	0.440972	18.695				-3.475	0				1	1	-1	-1	1	1	1	1	-1	1
811	3656	H	H1	BM05271	C	C1	6	1	SC	LQD	0.445833	23.49	0.459722	20.93	80	0.444444	20.058				-3.432	0				1	-1	1	-1	1	-1	1	-1	-1	-1
813	3657	H	H1	BM05271	C	C2	6	1	SC	LQD	0.446528	23.74	0.460417	21.19	80	0.447917	17.462				-6.278	0	1			1	-1	1	-1	1	-1	1	-1	-1	-1
817	3665	H	H3	BM06845	H	H4	3	0	IVC	LQD	0.385417	23.43	0.388889	21.18	80	0.417361	21.603	5.17058	2.95708	57.1905	-1.827	0				1	1	-1	1	1	1	1	1	1	1
819	3667	H	H3	BM06845	C	C2	3	1	SC	LQD	0.449306	23.89	0.4625	22.09	80	0.459028	18.572				-5.318	0				1	-1	1	-1	1	-1	1	-1	-1	-1
820	3675	C	C2	BM06752	H	H3	4	1	IVC	LQD	0.386806	30.89	0.390278	29.68	80	0.420833	30.61				-0.28	0				-1	1	1	1	1	-1	-1	1	1	-1
825	3676	C	C2	BM06752	C	C1	4	1	SC	LQD	0.451389	28.94	0.463889	25.9	80	0.465278	26.419				-2.521	0				-1	-1	1	-1	1	1	-1	-1	-1	1
818	3678	H	H4	BM06362	H	H3	5	0	SC	LQD	0.448611	21.56	0.461806	19.82	80	0.455556	17.534				-4.026	0				1	1	-1	-1	1	1	1	1	-1	1
827	3681	H	H4	BM06362	C	C1	5	1	IVC	LQD	0.388194	25.53	0.392361	25.37	80	0.427778	25.294	8.61598	4.50323	52.266	-0.236	0				1	-1	1	1	1	-1	1	-1	1	-1
808	3719	C	C2	BM06297	H	H1	2	1	IVC	LQD	0.39375	26.44	0.379861	25.07	81	0.413194	26.249	6.14757	3.54932	57.7353	-0.191	0				-1	1	1	1	1	-1	-1	1	1	-1
829	3720	C	C2	BM06297	C	C1	2	1	IVC	LQD	0.399306	25.44	0.385417	24.09	81	0.436111	24.531	5.35721	3.05296	56.9879	-0.909	0				-1	-1	1	1	1	1	-1	-1	1	1
812	3750	C	C1	BM05754	H	H1	6	1	IVC	LQD	0.394444	18.18	0.380556	16.15	81	0.417361	17.443	4.7114	2.6559	56.3718	-0.737	0				-1	1	1	1	1	-1	-1	1	1	-1
822	3752	C	C1	BM05754	H	H3	6	0	SC	LQD	0.464583	16.56	0.455556	14.09	81	0.461111	13.156				-3.404	0				-1	1	-1	-1	1	-1	-1	1	-1	-1
831	3755	C	C1	BM05754	C	C3	6	1	SC	LQD	0.466667	20.25	0.457639	17.44	81	0.475	17.924				-2.326	0				-1	-1	1	-1	1	1	-1	-1	-1	1
837	3763	H	H3	BM06886	C	C1	6	1	SC	LQD	0.46875	23.7	0.459722	21.95	81	0.483333	21.698				-2.002	0				1	-1	1	-1	1	-1	1	-1	-1	-1
824	3764	H	H3	BM06886	C	C2	6	1	IVC	LQD	0.397222	23.5	0.383333	24.05	81	0.427083	23.85	6.11049	3.42424	56.0387	0.35	0				1	-1	1	1	1	-1	1	-1	1	-1
826	3774	C	C1	BM06245	C	C2	4	1	IVC	LQD	0.397917	18.51	0.384028	17.02	81	0.432639	17.404	4.93039	2.90764	58.9738	-1.106	0				-1	-1	1	1	1	1	-1	-1	1	1
834	3793	C	C3	BM04517	H	H2	6	0	IVC	LQD	0.388194	19.64	0.399306	18.42	82	0.402778	18.337	4.92446	2.89146	58.7163	-1.303	0				-1	1	-1	1	1	-1	-1	1	1	-1
841	3810	H	H3	BM04824	C	C1	5	0	IVC	LQD	0.388889	22.46	0.4	20.57	82	0.406944	21.528	5.94191	3.40566	57.3159	-0.932	0				1	-1	-1	1	1	-1	1	-1	1	-1
853	3857	C	C3	BM06136	C	C1	6	0	IVC	LQD	0.394444	21.13	0.406944	20.48	83	0.429167	19.708	4.77306	2.77431	58.1244	-1.422	0				-1	-1	-1	1	1	1	-1	-1	1	1
844	3858	C	C3	BM06136	H	H3	6	1	IVC	LQD	0.390278	19.47	0.403472	18.48	83	0.410417	17.276	3.78872	2.16672	57.1888	-2.194	0				-1	1	1	1	1	-1	-1	1	1	-1
859	3883	C	C1	BM05968	H	H4	6	1	IVC	LQD	0.396528	22.45	0.409722	22.2	83	0.436806	21.146	5.00366	2.84741	56.9065	-1.304	0				-1	1	1	1	1	-1	-1	1	1	-1
861	3885	C	C1	BM05968	C	C4	6	0	SC	LQD	0.463194	19.08	0.481944	17.62	83	0.468056	14.776				-4.304	0				-1	-1	-1	-1	1	1	-1	-1	-1	1
840	3888	H	H4	BM05298	C	C3	4	0	IVC	LQD	0.388889	27.09	0.402778	26.64	83	0.40625	27.913	7.9422	4.5417	57.1844	0.823	0				1	-1	-1	1	1	-1	1	-1	1	-1
848	3890	H	H4	BM05298	H	H3	4	0	IVC	LQD	0.390972	21.02	0.404861	20.09	83	0.415972	21.797	6.4404	3.7359	58.0073	0.777	0				1	1	-1	1	1	1	1	1	1	1
846	3891	C	C4	BM06053	H	H3	5	1	SC	LQD	0.459722	22.47	0.479861	20.16	83	0.449306	20.98				-1.49	0				-1	1	1	-1	1	-1	-1	1	-1	-1
863	3892	C	C4	BM06053	C	C2	5	0	SC	LQD	0.463889	17.55	0.482639	15.48	83	0.471528	15.719				-1.831	0				-1	-1	-1	-1	1	1	-1	-1	-1	1
850	3893	C	C4	BM06053	C	C3	5	0	SC	LQD	0.460417	18.06	0.480556	16.9	83	0.453472	14.661				-3.399	0				-1	-1	-1	-1	1	1	-1	-1	-1	1
858	3895	C	C4	BM06053	C	C1	5	1	IVC	LQD	0.395139	19.6	0.408333	19.13	83	0.433333	20.655	5.77049	3.32799	57.6726	1.055	0				-1	-1	1	1	1	1	-1	-1	1	1
852	3908	C	C2	BM06854	C	C3	3	1	SC	LQD	0.472917	22.14	0.4625	20.11	84	0.433333	19.389				-2.751	0				-1	-1	1	-1	1	1	-1	-1	-1	1
864	3910	C	C2	BM06854	C	C4	3	0	IVC	LQD	0.4125	25.29	0.398611	23.68	84	0.405556	25.545	6.36053	3.76903	59.2565	0.255	0				-1	-1	-1	1	1	1	-1	-1	1	1
867	3926	C	C4	BM05732	C	C1	7	0	SC	LQD	0.476389	16.68	0.465972	14.9	84	0.447917	13.425				-3.255	0				-1	-1	-1	-1	1	1	-1	-1	-1	1
862	3928	C	C4	BM05732	C	C1	7	0	IVC	LQD	0.411111	18.55	0.393056	16.99	84	0.400694	15.99	4.09813	2.38713	58.2492	-2.56	0				-1	-1	-1	1	1	1	-1	-1	1	1
866	3956	C	C1	BM06654	C	C2	4	1	SC	LQD	0.475	22.31	0.463194	19.55	84	0.442361	18.655				-3.655	0				-1	-1	1	-1	1	1	-1	-1	-1	1
873	3976	H	H4	BM06392	C	C2	7	1	SC	LQD	0.477778	22.68	0.468056	22	84	0.45625	21.942				-0.738	0				1	-1	1	-1	1	-1	1	-1	-1	-1
875	4038	C	C2	BM05674	C	C1	4	1	IVC	LQD	0.4125	26.77	0.384028	23.53	85	0.409028	24.993	5.99779	3.46079	57.7011	-1.777	0				-1	-1	1	1	1	1	-1	-1	1	1
879	4050	C	C1	BM06744	C	C4	3	1	IVC	LQD	0.414583	24.29	0.388194	22.88	85	0.413889	22.313	4.84533	2.72683	56.2775	-1.977	0				-1	-1	1	1	1	1	-1	-1	1	1
878	4100	C	C4	BM06693	C	C2	7	1	IVC	LQD	0.390278	24.42	0.382639	21.73	86	0.399306	21.964	5.57419	3.16794	56.8323	-2.456	0				-1	-1	1	1	1	1	-1	-1	1	1
9	1130	C	C4	BM06696	H	H4	6	0	SC	SD	0.451389	15.96	0.450694	16.21	42	0.482639	16.725				0.765	0				-1	1	-1	-1	-1	-1	1	-1	1	1
26	1193	H	H4	BM06358	H	H3	7	0	SC	SD	0.453472	22.94	0.452083	22.83	42	0.490972	23.217				0.277	0				1	1	-1	-1	-1	1	-1	-1	1	-1
41	1214	H	H2	BM05635	C	C1	7	1	SC	SD	0.456944	22.28	0.454167	22.75	42	0.5	23.914				1.634	0				1	-1	1	-1	-1	-1	-1	1	1	1
56	1268	H	H1	BM06326	H	H3	5	1	SC	SD	0.460417	22.84	0.455556	23.51	42	0.505556	24.807				1.967	0				1	1	1	-1	-1	1	-1	-1	1	-1
2	1272	H	H4	BM05929	H	H1	4	1	SC	SD	0.447222	23.31	0.448611	23.73	42	0.472222	25.001				1.691	0				1	1	1	-1	-1	1	-1	-1	1	-1
44	1273	H	H4	BM05929	H	H2	4	0	SC	SD	0.458333	19.47	0.454861	19.67	42	0.503472	20.099				0.629	0				1	1	-1	-1	-1	1	-1	-1	1	-1
73	1285	H	H3	BM06367	C	C4	5	0	SC	SD	0.470139	23.2	0.458333	23.82	43	0.488889	24.642				1.442	0				1	-1	-1	-1	-1	-1	-1	1	1	1
81	1290	H	H2	BM06459	H	H1	6	1	SC	SD	0.472222	24.11	0.459722	24.56	43	0.493056	25.758				1.648	0				1	1	1	-1	-1	1	-1	-1	1	-1
85	1297	H	H1	BM05271	H	H4	8	0	IVC	SD	0.397917	22.42	0.330556	22.51	43	0.365972	24.027	5.42807	4.37032	80.5133	1.607	0				1	1	-1	1	-1	1	-1	-1	-1	-1
89	1301	H	H1	BM05271	C	C1	8	1	IVC	SD	0.399306	24.18	0.332639	24.27	43	0.369444	25.752	5.37084	4.39734	81.8743	1.572	0				1	-1	1	1	-1	-1	-1	1	-1	1
91	1310	H	H4	BM06350	H	H2	6	1	SC	SD	0.475694	23.82	0.461806	23.6	43	0.501389	24.886				1.066	0				1	1	1	-1	-1	1	-1	-1	1	-1
93	1313	H	H4	BM06350	C	C1	6	0	IVC	SD	0.401389	19.25	0.334028	19.72	43	0.372917	20.882	4.40347	3.58647	81.4464	1.632	0				1	-1	-1	1	-1	-1	-1	1	-1	1
97	1317	H	H2	BM05689	H	H4	7	0	IVC	SD	0.402778	22.54	0.334722	23.23	43	0.374306	23.649	5.41056	4.38581	81.0602	1.109	0				1	1	-1	1	-1	1	-1	-1	-1	-1
101	1321	H	H2	BM05689	H	H3	7	0	IVC	SD	0.404167	25.87	0.336806	26.63	43	0.377083	28.136	5.97394	4.65969	78.0003	2.266	0				1	1	-1	1	-1	1	-1	-1	-1	-1
103	1323	C	C2	BM04184	H	H1	5	0	SC	SD	0.478472	21.69	0.463889	21.42	43	0.508333	23.281				1.591	0				-1	1	-1	-1	-1	-1	1	-1	1	1
18	1325	C	C2	BM04184	H	H4	5	0	SC	SD	0.460417	20.71	0.452083	20.83	43	0.46875	21.045				0.335	0				-1	1	-1	-1	-1	-1	1	-1	1	1
109	1327	C	C2	BM04184	C	C4	5	0	SC	SD	0.479861	20.47	0.465278	20.08	43	0.511806	20.133				-0.337	0				-1	-1	-1	-1	-1	1	1	1	1	-1
117	1332	C	C2	BM06893	C	C3	6	1	IVC	SD	0.411806	24.29	0.34375	24.59	43	0.390278	25.674	5.75898	4.58373	79.5928	1.384	0				-1	-1	1	1	-1	1	1	1	-1	-1
66	1334	C	C1	BM06543	H	H4	6	0	SC	SD	0.468056	18.68	0.45625	18.54	43	0.484028	18.393				-0.287	0				-1	1	-1	-1	-1	-1	1	-1	1	1
42	1336	C	C1	BM06543	H	H2	6	1	IVC	SD	0.390278	25.79	0.324306	26.23	43	0.352083	26.614	6.04749	4.35524	72.0173	0.824	0				-1	1	1	1	-1	-1	1	-1	-1	1
50	1337	C	C1	BM06543	H	H1	6	0	SC	SD	0.464583	20.78	0.454167	21.42	43	0.477083	21.821				1.041	1				-1	1	-1	-1	-1	-1	1	-1	1	1
121	1344	C	C1	BM06763	C	C4	6	1	IVC	SD	0.4125	21.04	0.344444	21.54	43	0.391667	24.138	5.5716	4.3821	78.6507	3.098	0				-1	-1	1	1	-1	1	1	1	-1	-1
127	1353	H	H2	BM05812	C	C4	6	0	SC	SD	0.484028	22.4	0.468056	22.29	43	0.520139	22.587				0.187	0				1	-1	-1	-1	-1	-1	-1	1	1	1
129	1355	H	H2	BM05812	H	H4	6	1	IVC	SD	0.414583	23.13	0.346528	23.83	43	0.395139	24.491	5.42606	4.21031	77.5942	1.361	0				1	1	1	1	-1	1	-1	-1	-1	-1
131	1379	C	C1	BM04208	H	H3	7	0	SC	SD	0.486111	20.23	0.469444	20.17	43	0.523611	20.479				0.249	0				-1	1	-1	-1	-1	-1	1	-1	1	1
133	1380	C	C1	BM04208	C	C3	7	0	IVC	SD	0.415972	18.82	0.347222	18.91	43	0.396528	19.461	4.59255	3.6798	80.1254	0.641	0				-1	-1	-1	1	-1	1	1	1	-1	-1
90	1383	C	C1	BM04208	H	H1	7	1	SC	SD	0.475	20.21	0.461806	20.14	43	0.499306	21.416				1.206	0				-1	1	1	-1	-1	-1	1	-1	1	1
137	1384	C	C1	BM04208	C	C2	7	0	IVC	SD	0.418056	21.37	0.349306	20.84	43	0.4	20.768	4.39491	3.60416	82.0076	-0.602	0				-1	-1	-1	1	-1	1	1	1	-1	-1
147	1389	C	C1	BM06269	H	H3	6	1	SC	SD	0.488889	20.58	0.470833	20.64	43	0.530556	22.6				2.02	0				-1	1	1	-1	-1	-1	1	-1	1	1
149	1390	C	C1	BM06269	H	H2	6	0	IVC	SD	0.425	18.72	0.355556	18.23	43	0.410417	19.232				0.512	0				-1	1	-1	1	-1	-1	1	-1	-1	1
116	1391	C	C1	BM06269	C	C2	6	1	SC	SD	0.482639	20.83	0.466667	20.31	43	0.517361	20.974				0.144	0				-1	-1	1	-1	-1	1	1	1	1	-1
84	1402	C	C4	BM04161	H	H2	5	1	SC	SD	0.472917	20.42	0.459722	20.76	43	0.495139	20.771				0.351	0				-1	1	1	-1	-1	-1	1	-1	1	1
157	1412	H	H2	BM06491	C	C3	8	1	SC	SD	0.491667	22.34	0.473611	22.94	43	0.5375	23.928				1.588	0				1	-1	1	-1	-1	-1	-1	1	1	1
54	1419	H	H2	BM06491	H	H3	8	0	SC	SD	0.465278	19.86	0.454861	19.64	43	0.478472	20.941				1.081	0				1	1	-1	-1	-1	1	-1	-1	1	-1
165	1424	H	H2	BM04695	H	H1	8	0	SC	SD	0.494444	21.87	0.475694	21.9	43	0.544444	23.433				1.563	0				1	1	-1	-1	-1	1	-1	-1	1	-1
108	1432	C	C1	BM04482	C	C2	5	1	IVC	SD	0.406944	22.78	0.338889	21.03	43	0.38125	22.614	5.06533	4.09108	80.7663	-0.166	0				-1	-1	1	1	-1	1	1	1	-1	-1
171	1435	C	C1	BM04482	H	H4	5	0	IVC	SD	0.431944	17.58	0.361806	17.41	43	0.422222	18.155	4.39974	3.52149	80.0386	0.575	0				-1	1	-1	1	-1	-1	1	-1	-1	1
173	1458	H	H4	BM06373	H	H3	7	0	IVC	SD	0.434028	21.19	0.3625	23.66	43	0.423611	24.32	5.08775	4.13325	81.2393	3.13	0				1	1	-1	1	-1	1	-1	-1	-1	-1
14	1467	H	H2	BM05803	H	H4	6	0	SC	SD	0.459028	21.02	0.450694	20.99	43	0.465972	22.61				1.59	0				1	1	-1	-1	-1	1	-1	-1	1	-1
181	1468	H	H2	BM05803	C	C4	6	1	SC	SD	0.500694	26.82	0.479167	27.58	43	0.557639	29.445				2.625	0				1	-1	1	-1	-1	-1	-1	1	1	1
166	1479	H	H1	BM04841	H	H2	6	0	IVC	SD	0.429861	21.26	0.360417	20.68	43	0.41875	21.723	4.71419	3.85419	81.7572	0.463	0				1	1	-1	1	-1	1	-1	-1	-1	-1
180	1486	H	H2	BM06335	H	H4	5	1	SC	SD	0.5	26.26	0.478472	26.3	43	0.55625	28.106				1.846	0				1	1	1	-1	-1	1	-1	-1	1	-1
150	1487	H	H2	BM06335	C	C1	5	0	SC	SD	0.489583	21.81	0.471528	22.95	43	0.532639	24.07				2.26	0				1	-1	-1	-1	-1	-1	-1	1	1	1
184	1504	H	H4	BM06349	H	H1	4	0	SC	SD	0.502083	20.18	0.479861	20.01	43	0.559722	20.724				0.544	1				1	1	-1	-1	-1	1	-1	-1	1	-1
140	1505	H	H4	BM06349	C	C1	4	1	SC	SD	0.488194	22.63	0.470833	22.94	43	0.529167	24.05				1.42	0				1	-1	1	-1	-1	-1	-1	1	1	1
74	1511	C	C4	BM05496	H	H3	4	0	IVC	SD	0.39375	16.38	0.327083	17.49	43	0.359722	18.241	4.55641	3.58041	78.5796	1.861	0				-1	1	-1	1	-1	-1	1	-1	-1	1
160	1512	C	C2	BM04854	H	H2	7	0	SC	SD	0.492361	21.84	0.474306	22.61	43	0.539583	22.462				0.622	0				-1	1	-1	-1	-1	-1	1	-1	1	1
189	1514	C	C2	BM04854	H	H3	7	0	IVC	SD	0.439583	20.1	0.36875	20.07	43	0.434722	20.682	3.82354	3.01079	78.7435	0.582	0				-1	1	-1	1	-1	-1	1	-1	-1	1
102	1521	H	H3	BM06820	H	H2	7	0	SC	SD	0.477778	21.12	0.463889	21.04	43	0.50625	22.828				1.708	0				1	1	-1	-1	-1	1	-1	-1	1	-1
100	1528	C	C1	BM05754	H	H2	5	1	SC	SD	0.477083	18.15	0.463194	18.34	43	0.504861	19.653				1.503	0				-1	1	1	-1	-1	-1	1	-1	1	1
152	1535	H	H1	BM06735	C	C4	4	0	IVC	SD	0.425694	21.91	0.35625	21.7	43	0.4125	22.538	5.4041	4.3906	81.2457	0.628	0				1	-1	-1	1	-1	-1	-1	1	-1	1
178	1537	H	H1	BM06734	H	H4	4	1	IVC	SD	0.435417	24.54	0.364583	25.27	43	0.427083	27.189	6.55664	5.06189	77.2025	2.649	0				1	1	1	1	-1	1	-1	-1	-1	-1
195	1538	H	H1	BM06734	C	C1	4	0	SC	SD	0.503472	18.9	0.48125	18.73	43	0.566667	20.283				1.383	0				1	-1	-1	-1	-1	-1	-1	1	1	1
176	1542	C	C1	BM05851	H	H4	6	1	IVC	SD	0.434722	22.49	0.363889	22.51	43	0.425694	23.133	5.75153	4.59503	79.8923	0.643	0				-1	1	1	1	-1	-1	1	-1	-1	1
197	1543	C	C1	BM05851	H	H3	6	1	IVC	SD	0.442361	18.79	0.370833	19.08	43	0.438194	20.036	4.49353	3.70053	82.3524	1.246	0				-1	1	1	1	-1	-1	1	-1	-1	1
168	1553	H	H3	BM06464	H	H2	4	1	SC	SD	0.495139	27.32	0.476389	27.04	43	0.546528	28.536				1.216	0				1	1	1	-1	-1	1	-1	-1	1	-1
201	1565	C	C3	BM05303	C	C2	4	1	IVC	SD	0.388889	23.33	0.358333	22.79	44	0.3375	23.245	4.85768	3.75243	77.2474	-0.085	0				-1	-1	1	1	-1	1	1	1	-1	-1
203	1567	C	C3	BM05303	H	H4	4	0	IVC	SD	0.389583	19.35	0.359722	19.07	44	0.338889	19.97	4.23485	3.48335	82.2544	0.62	0				-1	1	-1	1	-1	-1	1	-1	-1	1
78	1572	C	C2	BM04624	H	H2	6	0	IVC	SD	0.381944	21.51	0.351389	22.12	44	0.327083	23.544	4.91204	3.99804	81.3927	2.034	0				-1	1	-1	1	-1	-1	1	-1	-1	1
209	1573	C	C2	BM04624	C	C4	6	0	IVC	SD	0.393056	18.58	0.361806	18.86	44	0.34375	19.106	4.12575	3.384	82.0214	0.526	0				-1	-1	-1	1	-1	1	1	1	-1	-1
211	1574	C	C2	BM04624	C	C1	6	1	IVC	SD	0.39375	24.95	0.3625	25.4	44	0.345139	26.839	6.00276	4.59876	76.6108	1.889	0				-1	-1	1	1	-1	1	1	1	-1	-1
204	1576	H	H4	BM06388	C	C3	6	0	SC	SD	0.491667	24.64	0.473611	24.34	44	0.480556	25.7				1.06	0				1	-1	-1	-1	-1	-1	-1	1	1	1
217	1578	H	H4	BM06388	H	H3	6	1	IVC	SD	0.396528	23.73	0.365278	23.93	44	0.349306	25.194	4.53273	3.56398	78.6277	1.464	1				1	1	1	1	-1	1	-1	-1	-1	-1
208	1580	H	H4	BM06388	C	C2	6	0	SC	SD	0.494444	20.95	0.473611	21.34	44	0.483333	22.606				1.656	0				1	-1	-1	-1	-1	-1	-1	1	1	1
221	1581	C	C4	BM04231	C	C2	5	1	IVC	SD	0.398611	21.12	0.367361	20.94	44	0.352778	22.782	6.04742	4.39067	72.604	1.662	1				-1	-1	1	1	-1	1	1	1	-1	-1
223	1582	C	C4	BM04231	H	H1	5	0	IVC	SD	0.4	18.67	0.36875	18.93	44	0.354861	19.75	4.77889	3.51489	73.5503	1.08	1				-1	1	-1	1	-1	-1	1	-1	-1	1
122	1584	C	C4	BM04231	C	C1	5	1	SC	SD	0.484722	20.09	0.469444	20.21	44	0.467361	21.463				1.373	1				-1	-1	1	-1	-1	1	1	1	1	-1
227	1585	C	C4	BM04231	H	H4	5	1	SC	SD	0.502083	21.71	0.477083	20.87	44	0.497917	23.268				1.558	1				-1	1	1	-1	-1	-1	1	-1	1	1
229	1586	C	C1	BM06245	H	H3	5	0	IVC	SD	0.403472	19.79	0.371528	19.06	44	0.361111	18.849	4.23864	3.54764	83.6976	-0.941	0				-1	1	-1	1	-1	-1	1	-1	-1	1
231	1587	C	C1	BM06245	C	C4	5	0	IVC	SD	0.404861	19.04	0.372917	19.25	44	0.3625	19.485	4.42644	3.54844	80.1646	0.445	0				-1	-1	-1	1	-1	1	1	1	-1	-1
233	1588	C	C1	BM06245	C	C3	5	0	SC	SD	0.504167	17.84	0.477778	18.43	44	0.503472	18.311				0.471	0				-1	-1	-1	-1	-1	1	1	1	1	-1
235	1589	C	C1	BM06245	H	H1	5	0	IVC	SD	0.405556	21.09	0.373611	21.69	44	0.363889	21.021	4.63784	3.80934	82.1361	-0.069	0				-1	1	-1	1	-1	-1	1	-1	-1	1
216	1590	C	C1	BM06245	H	H4	5	1	SC	SD	0.497222	24.72	0.475	24.92	44	0.488889	24.565				-0.155	0				-1	1	1	-1	-1	-1	1	-1	1	1
210	1591	C	C4	BM06053	C	C2	5	0	SC	SD	0.495139	15.56	0.474306	15.33	44	0.484722	15.886				0.326	0				-1	-1	-1	-1	-1	1	1	1	1	-1
237	1592	C	C4	BM06053	H	H4	5	0	IVC	SD	0.40625	16.7	0.374306	17	44	0.365278	17.913	4.61228	3.72953	80.8609	1.213	0				-1	1	-1	1	-1	-1	1	-1	-1	1
241	1594	C	C4	BM06053	H	H1	5	1	IVC	SD	0.408333	20.53	0.376389	18.04	44	0.36875	20.101	4.41189	3.26764	74.0644	-0.429	0				-1	1	1	1	-1	-1	1	-1	-1	1
245	1596	C	C1	BM06557	C	C4	2	0	SC	SD	0.509028	16.08	0.479861	16.7	44	0.511111	17.074				0.994	0				-1	-1	-1	-1	-1	1	1	1	1	-1
158	1600	C	C3	BM04373	H	H2	5	1	IVC	SD	0.384028	19.89	0.353472	19.59	44	0.329861	19.113	4.67468	3.60643	77.1482	-0.777	0				-1	1	1	1	-1	-1	1	-1	-1	1
251	1602	C	C3	BM04373	H	H1	5	1	IVC	SD	0.4125	20.79	0.38125	20.87	44	0.375	21.86	5.57376	4.27551	76.7078	1.07	0				-1	1	1	1	-1	-1	1	-1	-1	1
246	1605	C	C4	BM04348	C	C1	4	0	IVC	SD	0.410417	16.93	0.377778	17.27	44	0.371528	18.379	4.08693	3.30943	80.9759	1.449	0				-1	-1	-1	1	-1	1	1	1	-1	-1
248	1637	H	H4	BM06563	C	C3	6	1	IVC	SD	0.411806	25.62	0.380556	26.39	44	0.373611	27.441	6.54542	5.04442	77.0679	1.821	0				1	-1	1	1	-1	-1	-1	1	-1	1
262	1645	C	C2	BM05737	H	H4	8	1	SC	SD	0.5125	23.28	0.48125	23.23	44	0.516667	23.144				-0.136	0				-1	1	1	-1	-1	-1	1	-1	1	1
265	1647	C	C2	BM05737	C	C3	8	1	SC	SD	0.513889	28.43	0.481944	28.64	44	0.519444	29.06				0.63	0				-1	-1	1	-1	-1	1	1	1	1	-1
269	1651	C	C2	BM05737	H	H1	8	0	IVC	SD	0.421528	20.82	0.389583	22.51	44	0.390278	23.953	5.06703	4.22278	83.3384	3.133	0				-1	1	-1	1	-1	-1	1	-1	-1	1
275	1662	H	H2	BM06329	H	H3	5	0	SC	SD	0.518056	22.04	0.483333	22.18	44	0.527083	23.007				0.967	0				1	1	-1	-1	-1	1	-1	-1	1	-1
281	1706	H	H1	BM06048	C	C3	6	0	IVC	SD	0.428472	21.33	0.395139	21.33	44	0.403472	22.295	4.57081	3.81581	83.4821	0.965	0				1	-1	-1	1	-1	-1	-1	1	-1	1
214	1708	H	H1	BM06048	H	H4	6	1	SC	SD	0.496528	25.4	0.475	24.68	44	0.4875	25.82				0.42	0				1	1	1	-1	-1	1	-1	-1	1	-1
274	1709	H	H1	BM06048	H	H2	6	1	IVC	SD	0.423611	26.33	0.391667	26.27	44	0.394444	26.821	5.08873	4.06848	79.9508	0.491	0				1	1	1	1	-1	1	-1	-1	-1	-1
206	1710	H	H1	BM06048	C	C2	6	0	IVC	SD	0.390972	20.36	0.360417	21.3	44	0.340278	21.66	4.17151	3.48126	83.4532	1.3	0				1	-1	-1	1	-1	-1	-1	1	-1	1
200	1711	C	C2	BM06752	C	C1	8	1	IVC	SD	0.3875	24.49	0.357639	24.63	44	0.336111	26.177	5.95695	4.6802	78.567	1.687	0				-1	-1	1	1	-1	1	1	1	-1	-1
287	1715	C	C2	BM06752	H	H4	8	0	IVC	SD	0.43125	22.32	0.398611	23.09	44	0.409028	23.934	6.16503	4.66078	75.6003	1.614	0				-1	1	-1	1	-1	-1	1	-1	-1	1
286	1732	C	C4	BM06693	C	C2	6	1	SC	SD	0.520833	29.1	0.484722	28.95	44	0.53125	30				0.9	0				-1	-1	1	-1	-1	1	1	1	1	-1
232	1733	C	C4	BM06693	C	C1	6	0	SC	SD	0.503472	17.12	0.477778	17.39	44	0.501389	19.253				2.133	0				-1	-1	-1	-1	-1	1	1	1	1	-1
228	1756	H	H4	BM06359	C	C4	4	1	IVC	SD	0.402083	25.37	0.370833	24.62	44	0.359028	26.618	6.1769	4.9209	79.6662	1.248	0				1	-1	1	1	-1	-1	-1	1	-1	1
292	1758	C	C3	BM06712	C	C2	5	0	IVC	SD	0.433333	20.32	0.400694	20.06	44	0.411806	19.659	3.98104	3.28179	82.4355	-0.661	0				-1	-1	-1	1	-1	1	1	1	-1	-1
303	1760	C	C3	BM06712	H	H3	5	0	IVC	SD	0.4375	19.36	0.404861	19.93	44	0.41875	20.67	4.79291	3.86566	80.6537	1.31	0				-1	1	-1	1	-1	-1	1	-1	-1	1
305	1762	C	C3	BM06712	H	H4	5	1	IVC	SD	0.438194	24.74	0.405556	25.77	44	0.420139	25.745	5.04367	3.99592	79.2264	1.005	0				-1	1	1	1	-1	-1	1	-1	-1	1
302	1763	C	C3	BM06002	H	H4	5	1	SC	SD	0.524306	17.08	0.486806	17.34	44	0.536111	17.938				0.858	0				-1	1	1	-1	-1	-1	1	-1	1	1
134	1764	C	C3	BM06002	C	C1	5	0	SC	SD	0.485417	18.56	0.469444	19.37	44	0.46875	19.39				0.83	0				-1	-1	-1	-1	-1	1	1	1	1	-1
264	1775	H	H3	BM06364	C	C2	4	0	IVC	SD	0.418056	23.74	0.386111	23.44	44	0.384722	24.832	6.20895	4.84245	77.9914	1.092	0				1	-1	-1	1	-1	-1	-1	1	-1	1
308	1778	H	H1	BM06560	H	H3	7	0	SC	SD	0.526389	22.02	0.488194	21.63	44	0.540972	23.162				1.142	0				1	1	-1	-1	-1	1	-1	-1	1	-1
224	1780	H	H1	BM06560	C	C4	7	0	SC	SD	0.500694	17.72	0.476389	18.02	44	0.494444	18.741				1.021	0				1	-1	-1	-1	-1	-1	-1	1	1	1
258	1781	H	H1	BM06560	H	H4	7	1	SC	SD	0.511806	24.41	0.480556	24.87	44	0.515278	26.185				1.775	0				1	1	1	-1	-1	1	-1	-1	1	-1
304	1784	H	H3	BM06795	C	C3	4	0	SC	SD	0.525	24.87	0.4875	25.88	44	0.5375	26.721				1.851	0				1	-1	-1	-1	-1	-1	-1	1	1	1
240	1787	H	H3	BM06795	C	C4	4	0	IVC	SD	0.407639	24.29	0.375	24.18	44	0.366667	26.277	5.75227	4.57477	79.5298	1.987	0				1	-1	-1	1	-1	-1	-1	1	-1	1
276	1791	H	H3	BM06845	H	H2	5	0	IVC	SD	0.425	17.95	0.393056	19.32	44	0.397222	20.429	5.13387	3.60862	70.2904	2.479	0			1	1	1	-1	1	-1	1	-1	-1	-1	-1
306	1796	H	H4	BM06480	C	C3	7	1	SC	SD	0.525694	22.58	0.4875	22.78	44	0.538889	23.541				0.961	0				1	-1	1	-1	-1	-1	-1	1	1	1
190	1800	H	H3	BM04824	C	C2	6	0	SC	SD	0.488889	20.08	0.472222	20.49	44	0.476389	20.937				0.857	0				1	-1	-1	-1	-1	-1	-1	1	1	1
313	1801	H	H3	BM04824	C	C3	6	0	IVC	SD	0.441667	20.7	0.408333	21.13	44	0.425	22.256	4.87767	3.72242	76.3155	1.556	1				1	-1	-1	1	-1	-1	-1	1	-1	1
198	1802	H	H3	BM04824	C	C1	6	1	SC	SD	0.489583	20.96	0.472917	21.38	44	0.477778	23.035				2.075	0				1	-1	1	-1	-1	-1	-1	1	1	1
218	1804	H	H3	BM04824	H	H4	6	1	SC	SD	0.497917	22.02	0.475694	22.54	44	0.490278	23.915				1.895	0				1	1	1	-1	-1	1	-1	-1	1	-1
319	1808	H	H4	BM06791	C	C4	5	1	SC	SD	0.495139	24.85	0.484028	25.69	45	0.423611	26.696				1.846	0				1	-1	1	-1	-1	-1	-1	1	1	1
321	1809	H	H4	BM06791	H	H1	5	0	IVC	SD	0.422917	24.54	0.408333	24.62	45	0.364583	26.433	5.6642	4.5597	80.5003	1.893	0				1	1	-1	1	-1	1	-1	-1	-1	-1
327	1812	H	H4	BM06791	H	H2	5	0	SC	SD	0.497222	20.44	0.485417	20.15	45	0.428472	20.881				0.441	0				1	1	-1	-1	-1	1	-1	-1	1	-1
329	1813	C	C3	BM05957	H	H2	6	1	SC	SD	0.497917	17.32	0.485417	17.44	45	0.429861	16.515				-0.805	1				-1	1	1	-1	-1	-1	1	-1	1	1
280	1815	C	C3	BM05957	H	H4	6	0	SC	SD	0.491667	16.46	0.480556	16.87	45	0.413889	17.423				0.963	0				-1	1	-1	-1	-1	-1	1	-1	1	1
333	1817	C	C3	BM05957	C	C4	6	1	SC	SD	0.498611	21.06	0.486111	20.6	45	0.432639	22.202				1.142	0				-1	-1	1	-1	-1	1	1	1	1	-1
314	1818	C	C3	BM05957	H	H3	6	0	SC	SD	0.49375	15.96	0.483333	15.91	45	0.420139	16.097				0.137	1				-1	1	-1	-1	-1	-1	1	-1	1	1
335	1852	H	H2	BM05924	C	C3	4	0	IVC	SD	0.43125	25.11	0.415278	24.63	45	0.374306	26.937				1.827	0				1	-1	-1	1	-1	-1	-1	1	-1	1
328	1862	H	H2	BM05910	H	H4	7	0	IVC	SD	0.425	24.58	0.411111	24.43	45	0.368056	25.768				1.188	0				1	1	-1	1	-1	1	-1	-1	-1	-1
341	1863	H	H2	BM05910	C	C1	7	0	IVC	SD	0.434028	24.55	0.41875	24.15	45	0.378472	25.202	5.1476	4.14335	80.4909	0.652	0				1	-1	-1	1	-1	-1	-1	1	-1	1
284	1864	H	H2	BM05910	C	C2	7	0	SC	SD	0.491667	23.46	0.480556	23.61	45	0.415972	24.396				0.936	0				1	-1	-1	-1	-1	-1	-1	1	1	1
349	1889	H	H1	BM06496	C	C1	6	0	IVC	SD	0.4375	23.16	0.422222	23.28	45	0.382639	24.854	5.97231	4.69856	78.6724	1.694	0				1	-1	-1	1	-1	-1	-1	1	-1	1
330	1892	H	H2	BM05332	C	C3	8	1	IVC	SD	0.425694	21.86	0.411806	21.4	45	0.369444	22.748	5.37106	4.30881	80.2227	0.888	0				1	-1	1	1	-1	-1	-1	1	-1	1
353	1893	H	H2	BM05332	H	H1	8	1	IVC	SD	0.438194	23.14	0.422917	23.36	45	0.384028	24.676	6.24588	4.73638	75.8321	1.536	0				1	1	1	1	-1	1	-1	-1	-1	-1
357	1898	H	H2	BM05332	C	C2	8	0	IVC	SD	0.440278	22.38	0.425	21.74	45	0.386806	22.259	6.93448	5.21273	75.1712	-0.121	0				1	-1	-1	1	-1	-1	-1	1	-1	1
294	1910	H	H1	BM05935	C	C1	5	1	SC	SD	0.49375	26.19	0.482639	26.16	45	0.41875	26.929				0.739	0				1	-1	1	-1	-1	-1	-1	1	1	1
254	1911	H	H1	BM06876	C	C4	5	0	SC	SD	0.490278	17.5	0.479861	17.93	45	0.411111	19.245				1.745	1				1	-1	-1	-1	-1	-1	-1	1	1	1
338	1913	H	H1	BM06876	H	H2	5	1	SC	SD	0.499306	20.37	0.486806	20.55	45	0.436111	21.796				1.426	1				1	1	1	-1	-1	1	-1	-1	1	-1
359	1915	H	H1	BM06876	H	H3	5	1	IVC	SD	0.440972	23.99	0.426389	23.91	45	0.388194	24.816	6.18961	5.09661	82.3414	0.826	1				1	1	1	1	-1	1	-1	-1	-1	-1
356	1916	C	C4	BM06536	H	H2	6	0	IVC	SD	0.439583	19.58	0.423611	18.87	45	0.385417	20.021	4.57841	3.64441	79.5999	0.441	0				-1	1	-1	1	-1	-1	1	-1	-1	1
363	1918	C	C4	BM06536	H	H3	6	1	SC	SD	0.503472	21.23	0.490278	21.08	45	0.45	21.539				0.309	0				-1	1	1	-1	-1	-1	1	-1	1	1
367	1920	C	C4	BM06536	H	H1	6	0	SC	SD	0.503472	19.74	0.490972	19.77	45	0.452778	19.433				-0.307	0				-1	1	-1	-1	-1	-1	1	-1	1	1
318	1930	C	C4	BM04197	H	H3	5	0	SC	SD	0.494444	20.82	0.483333	20.68	45	0.421528	22.266				1.446	1				-1	1	-1	-1	-1	-1	1	-1	1	1
371	1934	H	H4	BM06392	C	C3	8	0	IVC	SD	0.447222	19.62	0.431944	19.79	45	0.397222	19.894	5.47697	3.67597	67.1168	0.274	0			1	1	-1	-1	1	-1	-1	-1	1	-1	1
373	1935	H	H4	BM06392	H	H3	8	1	SC	SD	0.504861	21.32	0.491667	21.28	45	0.454861	22.405				1.085	0				1	1	1	-1	-1	1	-1	-1	1	-1
366	1936	H	H4	BM06392	C	C4	8	0	IVC	SD	0.444444	21.27	0.429167	21.31	45	0.393056	21.732	6.02364	4.12814	68.5323	0.462	0			1	1	-1	-1	1	-1	-1	-1	1	-1	1
375	1938	H	H4	BM06392	C	C1	8	0	SC	SD	0.504861	19.88	0.491667	20.14	45	0.455556	20.042				0.162	0				1	-1	-1	-1	-1	-1	-1	1	1	1
290	1945	H	H1	BM05270	C	C2	7	0	SC	SD	0.492361	23.3	0.48125	25.7	45	0.417361	26.75				3.45	0				1	-1	-1	-1	-1	-1	-1	1	1	1
344	1947	H	H1	BM05270	H	H2	7	0	SC	SD	0.500694	24.27	0.488194	24.85	45	0.440972	25.696				1.426	0				1	1	-1	-1	-1	1	-1	-1	1	-1
381	1949	H	H1	BM06875	C	C3	4	1	IVC	SD	0.450694	26.58	0.434028	26.02	45	0.403472	27.163	5.13894	4.22644	82.2434	0.583	0				1	-1	1	1	-1	-1	-1	1	-1	1
360	1974	H	H3	BM06886	H	H1	5	1	SC	SD	0.502083	19.66	0.489583	19.16	45	0.447222	19.893				0.233	1				1	1	1	-1	-1	1	-1	-1	1	-1
342	1976	C	C1	BM05968	H	H2	6	0	SC	SD	0.5	19.36	0.4875	19.09	45	0.439583	19.022				-0.338	0				-1	1	-1	-1	-1	-1	1	-1	1	1
336	1981	C	C3	BM06136	H	H2	5	0	SC	SD	0.499306	20.57	0.486806	20.51	45	0.434028	21.481				0.911	0				-1	1	-1	-1	-1	-1	1	-1	1	1
382	1982	C	C3	BM06136	H	H1	5	1	SC	SD	0.506944	21.11	0.493056	21.12	45	0.460417	21.386				0.276	0				-1	1	1	-1	-1	-1	1	-1	1	1
395	1989	H	H2	BM05634	C	C2	6	1	IVC	SD	0.442361	24.46	0.430556	24.67	46	0.370139	25.932	7.3798	5.01905	68.0106	1.472	0			1	1	-1	1	1	-1	-1	-1	1	-1	1
397	1990	H	H2	BM05634	C	C4	6	0	IVC	SD	0.442361	20.88	0.43125	21.41	46	0.371528	22.532	5.35226	4.23576	79.1397	1.652	0				1	-1	-1	1	-1	-1	-1	1	-1	1
400	1998	C	C3	BM05749	H	H2	5	0	IVC	SD	0.443056	17.9	0.433333	17.24	46	0.373611	16.846	3.50998	2.77848	79.1594	-1.054	0				-1	1	-1	1	-1	-1	1	-1	-1	1
384	1999	C	C3	BM05749	H	H3	5	1	SC	SD	0.496528	17.38	0.507639	16.94	46	0.407639	16.712				-0.668	0				-1	1	1	-1	-1	-1	1	-1	1	1
403	2000	C	C3	BM05749	C	C1	5	1	SC	SD	0.498611	19.33	0.509722	19.52	46	0.417361	19.682				0.352	0				-1	-1	1	-1	-1	1	1	1	1	-1
415	2055	H	H1	BM06513	H	H3	4	0	IVC	SD	0.448611	24.1	0.441667	24.08	46	0.388889	25.229	4.47317	3.70067	82.7304	1.129	0				1	1	-1	1	-1	1	-1	-1	-1	-1
402	2061	C	C4	BM04951	C	C3	6	0	IVC	SD	0.44375	25.07	0.434722	24.71	46	0.375	25.891	5.3572	4.2927	80.1296	0.821	0				-1	-1	-1	1	-1	1	1	1	-1	-1
320	2062	C	C4	BM04951	H	H4	6	1	IVC	SD	0.4375	24.39	0.425	23.75	46	0.359028	24.919	6.84339	5.01289	73.2515	0.529	0				-1	1	1	1	-1	-1	1	-1	-1	1
410	2064	C	C4	BM04951	H	H2	6	1	SC	SD	0.5	24.29	0.511806	24.59	46	0.420139	25.18				0.89	0				-1	1	1	-1	-1	-1	1	-1	1	1
390	2069	C	C2	BM04641	C	C1	6	0	IVC	SD	0.440278	23.21	0.428472	23.4	46	0.365278	24.131	5.29292	4.35842	82.3443	0.921	0				-1	-1	-1	1	-1	1	1	1	-1	-1
324	2071	C	C2	BM04641	H	H4	6	1	IVC	SD	0.438889	24.66	0.426389	24.95	46	0.361111	26.162	5.85206	4.62031	78.9519	1.502	0				-1	1	1	1	-1	-1	1	-1	-1	1
429	2080	H	H1	BM06484	H	H3	5	0	IVC	SD	0.450694	20.44	0.445833	19.81	46	0.396528	20.634	4.88563	3.98538	81.5735	0.194	0				1	1	-1	1	-1	1	-1	-1	-1	-1
426	2081	H	H1	BM06484	C	C4	5	1	SC	SD	0.502778	25.31	0.515972	25.65	46	0.432639	27.139				1.829	0				1	-1	1	-1	-1	-1	-1	1	1	1
433	2084	H	H1	BM06484	C	C2	5	1	SC	SD	0.503472	23.17	0.516667	23.49	46	0.436111	25.302				2.132	0				1	-1	1	-1	-1	-1	-1	1	1	1
404	2085	C	C1	BM06439	C	C3	6	1	IVC	SD	0.444444	19.99	0.435417	19.47	46	0.376389	21.077	4.1255	3.364	81.5416	1.087	0				-1	-1	1	1	-1	1	1	1	-1	-1
435	2086	C	C1	BM06439	C	C2	6	1	IVC	SD	0.451389	21.79	0.446528	21.97	46	0.398611	22.849	4.63762	3.74262	80.7013	1.059	0				-1	-1	1	1	-1	1	1	1	-1	-1
422	2090	C	C1	BM06439	C	C4	6	1	SC	SD	0.502083	17.67	0.513194	18.02	46	0.428472	17.866				0.196	0				-1	-1	1	-1	-1	1	1	1	1	-1
439	2106	C	C4	BM06055	C	C3	2	1	SC	SD	0.527083	24.74	0.4625	25.25	47	0.492361	25.179				0.439	0				-1	-1	1	-1	-1	1	1	1	1	-1
430	2107	H	H3	BM06613	H	H1	6	0	SC	SD	0.525	17.55	0.460417	18.12	47	0.486806	19.538				1.988	1				1	1	-1	-1	-1	1	-1	-1	1	-1
441	2108	H	H3	BM06613	C	C3	6	0	IVC	SD	0.465972	18.19	0.403472	18.64	47	0.368056	19.149	4.35398	3.37498	77.5148	0.959	1				1	-1	-1	1	-1	-1	-1	1	-1	1
396	2116	C	C2	BM06031	H	H2	6	1	SC	SD	0.522222	20.68	0.458333	20.94	47	0.476389	19.325				-1.355	0				-1	1	1	-1	-1	-1	1	-1	1	1
420	2117	C	C2	BM06031	H	H1	6	1	IVC	SD	0.461111	23.68	0.399306	23.51	47	0.358333	24.65	5.19966	4.09441	78.7438	0.97	0				-1	1	1	1	-1	-1	1	-1	-1	1
436	2118	C	C2	BM06031	C	C1	6	1	SC	SD	0.525694	22.77	0.460417	22.48	47	0.488889	22.58				-0.19	0				-1	-1	1	-1	-1	1	1	1	1	-1
445	2119	C	C2	BM06031	C	C4	6	0	SC	SD	0.53125	20.26	0.463194	20.76	47	0.498611	21.262				1.002	0				-1	-1	-1	-1	-1	1	1	1	1	-1
455	2126	C	C4	BM06241	H	H3	5	1	IVC	SD	0.472917	22.32	0.410417	21.98	47	0.384028	23.303	5.94315	4.21165	70.8656	0.983	1				-1	1	1	1	-1	-1	1	-1	-1	1
457	2127	C	C4	BM06241	H	H1	5	1	SC	SD	0.532639	20.35	0.464583	21	47	0.504861	21.34				0.99	1				-1	1	1	-1	-1	-1	1	-1	1	1
446	2138	C	C4	BM05546	C	C2	5	0	IVC	SD	0.46875	23.67	0.405556	23.61	47	0.372222	25.778	5.40185	4.08235	75.5732	2.108	1				-1	-1	-1	1	-1	1	1	1	-1	-1
444	2139	C	C4	BM05546	H	H3	5	1	SC	SD	0.529167	26.1	0.463194	25.81	47	0.496528	26.347				0.247	1				-1	1	1	-1	-1	-1	1	-1	1	1
398	2141	C	C4	BM05546	H	H2	5	0	SC	SD	0.522917	19.88	0.459028	20.42	47	0.478472	20.622				0.742	1				-1	1	-1	-1	-1	-1	1	-1	1	1
463	2155	C	C3	BM06790	H	H4	7	1	SC	SD	0.533333	20.33	0.465278	20.73	47	0.506944	21.304				0.974	0				-1	1	1	-1	-1	-1	1	-1	1	1
412	2157	C	C3	BM06790	H	H2	7	1	SC	SD	0.524306	21.13	0.459722	21.42	47	0.482639	22.036				0.906	0				-1	1	1	-1	-1	-1	1	-1	1	1
418	2159	C	C3	BM06790	H	H1	7	1	IVC	SD	0.459722	22.79	0.397222	23.4	47	0.355556	24.105	5.42139	4.30414	79.3918	1.315	0				-1	1	1	1	-1	-1	1	-1	-1	1
458	2167	H	H1	BM06558	C	C4	6	1	IVC	SD	0.473611	24.87	0.411111	24.59	47	0.386111	25.752	4.95713	4.09588	82.626	0.882	0				1	-1	1	1	-1	-1	-1	1	-1	1
469	2170	H	H1	BM06558	H	H3	6	0	SC	SD	0.534028	22.59	0.465972	23.19	47	0.508333	23.951				1.361	0				1	1	-1	-1	-1	1	-1	-1	1	-1
394	2174	H	H3	BM05866	H	H2	9	0	IVC	SD	0.459028	21.22	0.395833	22.17	47	0.354167	22.364	4.62813	3.72613	80.5105	1.144	0				1	1	-1	1	-1	1	-1	-1	-1	-1
471	2181	C	C3	BM06618	C	C2	6	0	IVC	SD	0.420139	17.38	0.378472	17.57	48	0.360417	17.537	4.0993	3.2613	79.5575	0.157	0				-1	-1	-1	1	-1	1	1	1	-1	-1
475	2185	C	C3	BM06618	C	C1	6	1	IVC	SD	0.422222	19.72	0.380556	19.55	48	0.363889	19.669	3.82633	3.16408	82.6923	-0.051	0				-1	-1	1	1	-1	1	1	1	-1	-1
454	2186	C	C3	BM06618	C	C4	6	0	SC	SD	0.469444	15.48	0.447917	15.24	48	0.468056	15.302				-0.178	0				-1	-1	-1	-1	-1	1	1	1	1	-1
456	2187	H	H3	BM04825	C	C4	5	1	SC	SD	0.470139	21.88	0.448611	22.11	48	0.469444	22.764				0.884	0				1	-1	1	-1	-1	-1	-1	1	1	1
477	2188	H	H3	BM04825	H	H4	5	0	IVC	SD	0.422917	21.68	0.38125	21.05	48	0.366667	21.623	4.54489	3.66739	80.6926	-0.057	0				1	1	-1	1	-1	1	-1	-1	-1	-1
481	2191	H	H3	BM04825	C	C1	5	1	IVC	SD	0.424306	24.07	0.381944	23.66	48	0.36875	23.938	5.29398	4.30223	81.2665	-0.132	0				1	-1	1	1	-1	-1	-1	1	-1	1
483	2192	H	H4	BM06865	H	H1	5	0	IVC	SD	0.425	19.05	0.382639	19.85	48	0.370139	20.582	5.08442	4.04317	79.5208	1.532	0				1	1	-1	1	-1	1	-1	-1	-1	-1
485	2193	H	H4	BM06865	C	C2	5	0	IVC	SD	0.426389	20.48	0.384028	20.51	48	0.373611	22.342	5.78651	4.55026	78.6357	1.862	0				1	-1	-1	1	-1	-1	-1	1	-1	1
478	2194	H	H4	BM06865	H	H3	5	0	SC	SD	0.472917	19.68	0.450694	19.97	48	0.479861	20.554				0.874	0				1	1	-1	-1	-1	1	-1	-1	1	-1
491	2200	H	H1	BM06796	H	H3	7	1	SC	SD	0.477083	24.33	0.452778	24.88	48	0.490278	25.59				1.26	0				1	1	1	-1	-1	1	-1	-1	1	-1
486	2206	C	C2	BM05639	H	H4	7	0	SC	SD	0.475694	17.35	0.452083	17.28	48	0.486111	17.196				-0.154	0				-1	1	-1	-1	-1	-1	1	-1	1	1
472	2208	C	C2	BM05639	C	C3	7	0	SC	SD	0.471528	19.47	0.449306	19.23	48	0.473611	19.933				0.463	0				-1	-1	-1	-1	-1	1	1	1	1	-1
498	2219	C	C1	BM06744	C	C2	5	0	SC	SD	0.478472	13.7	0.454167	15.17	48	0.49375	16.454				2.754	0				-1	-1	-1	-1	-1	1	1	1	1	-1
488	2220	C	C1	BM06744	H	H1	5	0	SC	SD	0.475694	20.07	0.452778	20.05	48	0.488194	18.738				-1.332	0				-1	1	-1	-1	-1	-1	1	-1	1	1
476	2222	C	C1	BM06744	C	C3	5	1	SC	SD	0.472222	24.97	0.45	25.21	48	0.477778	26.333				1.363	0				-1	-1	1	-1	-1	1	1	1	1	-1
474	2227	H	H3	BM05184	C	C3	6	1	SC	SD	0.472222	22.6	0.449306	23.68	48	0.475	24.986				2.386	0				1	-1	1	-1	-1	-1	-1	1	1	1
505	2246	C	C2	BM05674	C	C3	6	1	IVC	SD	0.408333	24.87	0.334722	25.41	49	0.375694	26.425	6.40361	4.81986	75.2679	1.555	0				-1	-1	1	1	-1	1	1	1	-1	-1
490	2249	C	C2	BM05674	H	H1	6	1	SC	SD	0.455556	20.9	0.4875	21.15	49	0.431944	21.518				0.618	0				-1	1	1	-1	-1	-1	1	-1	1	1
506	2251	C	C3	BM05850	C	C2	3	1	SC	SD	0.459028	16.36	0.490972	16.15	49	0.439583	16.373				0.013	1				-1	-1	1	-1	-1	1	1	1	1	-1
509	2287	H	H2	BM05330	H	H3	6	1	IVC	SD	0.340972	25.86	0.338889	26.07	52	0.376389	27.889	6.89003	5.33678	77.4566	2.029	0				1	1	1	1	-1	1	-1	-1	-1	-1
511	2288	H	H2	BM05330	H	H4	6	1	IVC	SD	0.341667	29.14	0.340278	29.39	52	0.380556	30.842	8.42881	5.91356	70.1589	1.702	0				1	1	1	1	-1	1	-1	-1	-1	-1
514	2304	C	C3	BM04219	H	H2	6	0	SC	SD	0.444444	15.33	0.450694	15.1	53	0.440278	16.453				1.123	0				-1	1	-1	-1	-1	-1	1	-1	1	1
519	2309	H	H4	BM05916	C	C4	6	0	IVC	SD	0.345139	18.17	0.344444	18.35	53	0.378472	20.543	4.32367	3.60492	83.3764	2.373	0				1	-1	-1	1	-1	-1	-1	1	-1	1
512	2310	H	H4	BM05916	H	H2	6	1	SC	SD	0.44375	23.1	0.45	22.88	53	0.436111	24.132				1.032	0				1	1	1	-1	-1	1	-1	-1	1	-1
516	2311	H	H4	BM05916	C	C3	6	0	IVC	SD	0.34375	21.92	0.34375	22.11	53	0.375694	23.554	4.81841	3.94391	81.8509	1.634	0				1	-1	-1	1	-1	-1	-1	1	-1	1
525	2321	C	C3	BM04225	C	C4	4	0	IVC	SD	0.348611	18.28	0.358333	17.46	54	0.384722	18.378	4.50253	3.48078	77.3072	0.098	0				-1	-1	-1	1	-1	1	1	1	-1	-1
527	2322	C	C3	BM04225	C	C1	4	0	IVC	SD	0.350694	17.92	0.360417	18.15	54	0.3875	19.347	4.11784	3.40559	82.7033	1.427	0				-1	-1	-1	1	-1	1	1	1	-1	-1
526	2331	C	C4	BM05732	C	C3	4	0	SC	SD	0.454167	17.7	0.447917	18.16	54	0.442361	17.794				0.094	0				-1	-1	-1	-1	-1	1	1	1	1	-1
520	2332	C	C4	BM05732	H	H4	4	0	SC	SD	0.453472	21.17	0.447222	20.91	54	0.438889	21.592				0.422	0				-1	1	-1	-1	-1	-1	1	-1	1	1
522	2334	C	C1	BM06437	H	H4	5	0	IVC	SD	0.345833	20.36	0.35625	19.86	54	0.376389	21.647	4.53133	3.69683	81.5838	1.287	0				-1	1	-1	1	-1	-1	1	-1	-1	1
530	2357	C	C4	BM04982	C	C1	6	1	IVC	SD	0.3625	22.26	0.352778	22.47	55	0.380556	24.188	5.87578	4.10028	69.7827	1.928	1				-1	-1	1	1	-1	1	1	1	-1	-1
534	2379	C	C2	BM06297	C	C4	6	0	IVC	SD	0.354167	24.19	0.361806	24.01	56	0.385417	25.988	5.49387	4.53762	82.5942	1.798	0				-1	-1	-1	1	-1	1	1	1	-1	-1
539	2414	C	C3	BM04517	C	C2	8	0	SC	SD	0.446528	17.51	0.445833	17.76	60	0.436111	18.287				0.777	0				-1	-1	-1	-1	-1	1	1	1	1	-1
545	2420	C	C2	BM06854	H	H1	6	0	IVC	SD	0.364583	21.33	0.363889	22.12	60	0.418056	22.82	4.70432	3.76782	80.0928	1.49	0				-1	1	-1	1	-1	-1	1	-1	-1	1
547	2421	C	C2	BM06854	H	H2	6	1	IVC	SD	0.365278	23.27	0.365278	24.04	60	0.422222	24.664	6.29221	4.87221	77.4324	1.394	0				-1	1	1	1	-1	-1	1	-1	-1	1
551	2423	C	C2	BM06854	H	H3	6	0	SC	SD	0.447917	18.5	0.446528	17.05	60	0.44375	18.475				-0.025	0				-1	1	-1	-1	-1	-1	1	-1	1	1
548	2440	H	H2	BM06468	C	C2	6	1	SC	SD	0.449306	20.95	0.452778	21.79	61	0.445833	22.628				1.678	0				1	-1	1	-1	-1	-1	-1	1	1	1
555	2452	H	H1	BM06342	H	H2	3	0	IVC	SD	0.371528	26.06	0.397917	26.54	61	0.420139	28.184	7.61997	5.81297	76.286	2.124	0				1	1	-1	1	-1	1	-1	-1	-1	-1
544	2453	H	H1	BM06342	C	C3	3	1	SC	SD	0.448611	27.14	0.452083	27.45	61	0.436806	28.516				1.376	0				1	-1	1	-1	-1	-1	-1	1	1	1
557	2469	H	H1	BM06326	H	H2	4	0	SC	SD	0.45	20.47	0.454167	20.7	61	0.454167	22.903				2.433	0				1	1	-1	-1	-1	1	-1	-1	1	-1
550	2483	H	H4	BM04827	C	C2	4	1	IVC	SD	0.369444	13.39	0.395833	14.55	61	0.4125	16.685	4.54209	3.64284	80.2019	3.295	0				1	-1	1	1	-1	-1	-1	1	-1	1
558	2491	H	H2	BM06396	H	H1	4	0	IVC	SD	0.372222	17.68	0.398611	19.55	61	0.424306	20.539	5.3949	4.1709	77.3119	2.859	0				1	1	-1	1	-1	1	-1	-1	-1	-1
561	2564	H	H2	BM05635	H	H4	7	1	SC	SD	0.447917	22.61	0.452778	22.87	62	0.45	24.584				1.974	0				1	1	1	-1	-1	1	-1	-1	1	-1
556	2566	H	H2	BM05635	H	H1	7	0	SC	SD	0.446528	23.41	0.452083	24.06	62	0.445833	24.549				1.139	0				1	1	-1	-1	-1	1	-1	-1	1	-1
554	2603	H	H4	BM06362	H	H2	4	1	IVC	SD	0.378472	24.07	0.399306	23.94	62	0.402083	26.393				2.323	1				1	1	1	1	-1	1	-1	-1	-1	-1
569	2611	H	H4	BM05192	C	C4	4	0	SC	SD	0.448611	24.45	0.453472	24.81	62	0.454167	25.688				1.238	0				1	-1	-1	-1	-1	-1	-1	1	1	1
573	2623	H	H3	BM05199	C	C2	6	0	IVC	SD	0.386111	20.48	0.40625	20.83	62	0.430556	21.559	4.75587	3.82762	80.482	1.079	0				1	-1	-1	1	-1	-1	-1	1	-1	1
579	2635	C	C2	BM06151	H	H4	4	1	SC	SD	0.466667	26.36	0.444444	26.74	63	0.490278	26.958				0.598	0				-1	1	1	-1	-1	-1	1	-1	1	1
581	2645	C	C4	BM04348	H	H3	4	0	SC	SD	0.467361	18.28	0.445139	17.62	63	0.492361	17.88				-0.4	0				-1	1	-1	-1	-1	-1	1	-1	1	1
583	2646	C	C4	BM04348	C	C3	4	0	IVC	SD	0.373611	18.74	0.388194	19	63	0.398611	19.747	4.40658	3.52758	80.0526	1.007	0				-1	-1	-1	1	-1	1	1	1	-1	-1
585	2647	C	C4	BM04348	H	H4	4	1	SC	SD	0.472917	20.21	0.445833	19.89	63	0.497917	21.741				1.531	0				-1	1	1	-1	-1	-1	1	-1	1	1
587	2649	H	H3	BM04844	H	H1	7	1	IVC	SD	0.375694	20.98	0.390972	21.55	63	0.402778	23.365	5.53784	4.27834	77.2565	2.385	0				1	1	1	1	-1	1	-1	-1	-1	-1
582	2650	H	H3	BM04844	C	C4	7	0	IVC	SD	0.372222	20.66	0.386806	20.49	63	0.396528	21.537	4.52534	3.60259	79.6093	0.877	0				1	-1	-1	1	-1	-1	-1	1	-1	1
600	2692	H	H3	BM06820	C	C4	7	0	IVC	SD	0.381944	23.59	0.394444	24.15	63	0.4125	25.957	5.87018	4.64118	79.0637	2.367	0				1	-1	-1	1	-1	-1	-1	1	-1	1
601	2694	H	H3	BM06820	C	C1	7	1	IVC	SD	0.383333	23.21	0.395139	24.97	63	0.414583	24.993	5.39476	4.21401	78.113	1.783	0				1	-1	1	1	-1	-1	-1	1	-1	1
603	2695	H	H3	BM06820	C	C2	7	1	IVC	SD	0.384028	26.89	0.396528	26.97	63	0.416667	28.693	6.25385	4.72985	75.631	1.803	0				1	-1	1	1	-1	-1	-1	1	-1	1
605	2696	H	H3	BM06820	H	H1	7	1	IVC	SD	0.385417	24.48	0.397222	24.47	63	0.418056	25.191	5.0136	3.9636	79.057	0.711	0				1	1	1	1	-1	1	-1	-1	-1	-1
572	2706	C	C1	BM06763	H	H3	5	1	SC	SD	0.463889	20.13	0.443056	20.37	63	0.484028	21.518				1.388	0				-1	1	1	-1	-1	-1	1	-1	1	1
611	2714	H	H1	BM06735	C	C3	6	1	IVC	SD	0.388889	24.52	0.4	25.46	63	0.425	26.405	5.9658	4.72155	79.1436	1.885	0				1	-1	1	1	-1	-1	-1	1	-1	1
617	2725	H	H2	BM05812	C	C1	5	1	IVC	SD	0.392361	26.27	0.401389	26.22	63	0.427083	28.523	7.2538	5.5178	76.0677	2.253	0				1	-1	1	1	-1	-1	-1	1	-1	1
619	2727	H	H2	BM05812	C	C3	5	1	SC	SD	0.483333	24.78	0.451389	25.57	63	0.519444	26.83				2.05	0				1	-1	1	-1	-1	-1	-1	1	1	1
574	2745	C	C2	BM04184	H	H3	2	0	SC	SD	0.464583	19.07	0.443056	19.26	63	0.486806	19.943				0.873	1				-1	1	-1	-1	-1	-1	1	-1	1	1
618	2748	C	C1	BM06654	H	H2	6	1	SC	SD	0.481944	20.22	0.451389	21.01	63	0.518056	21.172				0.952	0				-1	1	1	-1	-1	-1	1	-1	1	1
566	2751	C	C1	BM06654	H	H4	6	0	SC	SD	0.4625	17.55	0.441667	17.65	63	0.480556	17.151				-0.399	0				-1	1	-1	-1	-1	-1	1	-1	1	1
622	2763	H	H1	BM06560	H	H2	7	1	IVC	SD	0.39375	22.66	0.402083	23.29	63	0.429167	25.128				2.468	0				1	1	1	1	-1	1	-1	-1	-1	-1
592	2764	C	C3	BM06002	H	H3	5	1	IVC	SD	0.379861	20.42	0.392361	20.06	63	0.407639	21.031	4.63111	3.68261	79.519	0.611	0				-1	1	1	1	-1	-1	1	-1	-1	1
610	2771	H	H4	BM06359	C	C1	5	1	IVC	SD	0.388194	26.48	0.399306	26.52	63	0.422222	28.21	5.95983	4.76233	79.9071	1.73	0				1	-1	1	1	-1	-1	-1	1	-1	1
627	2785	C	C1	BM04208	C	C4	6	0	SC	SD	0.459722	18.39	0.463889	17.71	64	0.484028	17.968				-0.422	0				-1	-1	-1	-1	-1	1	1	1	1	-1
629	2799	H	H2	BM06491	C	C2	5	0	IVC	SD	0.36875	21.42	0.36875	22.21	64	0.404861	22.223	4.90243	3.92718	80.1068	0.803	0				1	-1	-1	1	-1	-1	-1	1	-1	1
637	2826	H	H1	BM06048	H	H4	5	1	SC	SD	0.4625	24.82	0.465972	24.91	64	0.489583	25.946				1.126	0				1	1	1	-1	-1	1	-1	-1	1	-1
604	2840	C	C2	BM04624	H	H3	7	1	SC	SD	0.457639	22.15	0.461806	21.85	64	0.477778	21.643				-0.507	0				-1	1	1	-1	-1	-1	1	-1	1	1
578	2846	H	H1	BM06734	C	C2	3	0	IVC	SD	0.3625	23.68	0.364583	24.56	64	0.395139	25.778	5.72695	4.6212	80.6922	2.098	0				1	-1	-1	1	-1	-1	-1	1	-1	1
643	2850	C	C4	BM04231	C	C3	4	1	IVC	SD	0.375	23.92	0.373611	24.23	64	0.417361	26.297	5.85383	4.34808	74.2775	2.377	1				-1	-1	1	1	-1	1	1	1	-1	-1
645	2853	H	H4	BM06388	H	H2	7	1	IVC	SD	0.376389	26.95	0.375	27.55	64	0.420139	28.783				1.833	0				1	1	1	1	-1	1	-1	-1	-1	-1
647	2855	H	H4	BM06388	H	H1	7	1	SC	SD	0.465972	28.42	0.468056	28.62	64	0.496528	30.646				2.226	0				1	1	1	-1	-1	1	-1	-1	1	-1
651	2860	H	H2	BM05689	C	C3	5	1	SC	SD	0.466667	28.79	0.46875	29.27	64	0.498611	30.44				1.65	0				1	-1	1	-1	-1	-1	-1	1	1	1
653	2862	H	H2	BM05689	C	C1	5	1	IVC	SD	0.379167	30.51	0.376389	31.17	64	0.425	33.606	8.1896	6.01635	73.4633	3.096	0				1	-1	1	1	-1	-1	-1	1	-1	1
576	2863	H	H2	BM05689	C	C2	5	1	SC	SD	0.454167	28.22	0.460417	27.78	64	0.470139	30.773				2.553	0				1	-1	1	-1	-1	-1	-1	1	1	1
612	2875	C	C3	BM06712	H	H1	4	1	SC	SD	0.458333	19.84	0.4625	19.03	64	0.479861	18.731				-1.109	0				-1	1	1	-1	-1	-1	1	-1	1	1
598	2879	H	H2	BM06329	C	C4	3	0	IVC	SD	0.363889	27	0.365278	27.75	64	0.397222	29.089	6.34028	4.94553	78.0018	2.089	0				1	-1	-1	1	-1	-1	-1	1	-1	1
657	2881	H	H2	BM06329	C	C1	3	1	SC	SD	0.467361	28.86	0.46875	28.64	64	0.500694	29.789				0.929	0				1	-1	1	-1	-1	-1	-1	1	1	1
594	2920	C	C1	BM06688	H	H3	4	0	SC	SD	0.455556	19.99	0.461111	20.34	64	0.474306	20.877				0.887	0				-1	1	-1	-1	-1	-1	1	-1	1	1
652	2928	C	C3	BM05303	H	H2	5	1	IVC	SD	0.348611	22.51	0.354167	22	65	0.397222	22.728	4.43635	3.6401	82.0517	0.218	0				-1	1	1	1	-1	-1	1	-1	-1	1
659	2929	C	C3	BM05303	H	H4	5	1	IVC	SD	0.349306	25.65	0.354861	25.58	65	0.398611	26.442	5.46407	4.31307	78.9351	0.792	0				-1	1	1	1	-1	-1	1	-1	-1	1
628	2939	C	C4	BM04197	C	C1	5	0	IVC	SD	0.34375	20.47	0.350694	20.54	65	0.388889	22.318	5.73405	4.0888	71.3073	1.848	1				-1	-1	-1	1	-1	1	1	1	-1	-1
669	2953	C	C1	BM05851	C	C4	6	0	IVC	SD	0.354861	16.26	0.359722	16.47	65	0.409028	15.405	4.05699	3.30499	81.4641	-0.855	0				-1	-1	-1	1	-1	1	1	1	-1	-1
671	2954	C	C1	BM05851	H	H2	6	0	SC	SD	0.478472	16.34	0.488194	16.27	65	0.451389	16.257				-0.083	0				-1	1	-1	-1	-1	-1	1	-1	1	1
656	2956	C	C1	BM05851	C	C3	6	1	SC	SD	0.473611	18.51	0.484722	18.91	65	0.441667	19.67				1.16	0				-1	-1	1	-1	-1	1	1	1	1	-1
673	2984	H	H2	BM05924	C	C4	6	1	SC	SD	0.479861	23.57	0.488889	23.74	65	0.453472	25.415				1.845	0				1	-1	1	-1	-1	-1	-1	1	1	1
679	2999	H	H4	BM06480	C	C2	6	1	SC	SD	0.48125	23.28	0.489583	23.51	65	0.458333	24.415				1.135	0				1	-1	1	-1	-1	-1	-1	1	1	1
678	3002	H	H4	BM06480	H	H1	6	0	SC	SD	0.479861	21.19	0.488889	21.13	65	0.455556	23.116				1.926	0				1	1	-1	-1	-1	1	-1	-1	1	-1
662	3005	H	H1	BM06876	C	C3	5	1	SC	SD	0.474306	22.67	0.485417	23.12	65	0.44375	24.16				1.49	1				1	-1	1	-1	-1	-1	-1	1	1	1
681	3006	H	H1	BM06876	C	C1	5	1	SC	SD	0.481944	22.61	0.490278	22.54	65	0.459722	23.271				0.661	1				1	-1	1	-1	-1	-1	-1	1	1	1
648	3015	H	H1	BM06513	H	H4	5	1	IVC	SD	0.347917	25.03	0.353472	25.98	65	0.394444	26.463	5.13212	4.02262	78.3813	1.433	0				1	1	1	1	-1	1	-1	-1	-1	-1
630	3024	C	C2	BM05266	H	H2	5	0	SC	SD	0.470139	19.47	0.481944	19.34	65	0.430556	19.149				-0.321	0				-1	1	-1	-1	-1	-1	1	-1	1	1
685	3025	C	C2	BM05266	C	C4	5	1	IVC	SD	0.361806	21.14	0.365972	21.46	65	0.420833	20.636	4.15799	3.41574	82.1488	-0.504	0				-1	-1	1	1	-1	1	1	1	-1	-1
689	3028	H	H4	BM06503	C	C4	4	1	SC	SD	0.495139	21.47	0.486111	21.99	66	0.452083	22.973				1.503	0				1	-1	1	-1	-1	-1	-1	1	1	1
660	3029	H	H4	BM06503	C	C3	4	1	SC	SD	0.490972	23.65	0.482639	23.94	66	0.438889	25.421				1.771	0				1	-1	1	-1	-1	-1	-1	1	1	1
693	3031	H	H4	BM06503	C	C2	4	0	SC	SD	0.495833	19.24	0.486111	19.97	66	0.454167	21.022				1.782	0				1	-1	-1	-1	-1	-1	-1	1	1	1
695	3032	C	C3	BM04373	C	C4	3	0	IVC	SD	0.345833	16.61	0.357639	16.61	66	0.3875	16.771	4.15606	3.30831	79.6021	0.161	0				-1	-1	-1	1	-1	1	1	1	-1	-1
697	3033	C	C3	BM04373	C	C1	3	0	IVC	SD	0.346528	18.02	0.359028	18.23	66	0.390278	19.349	4.77396	3.62271	75.8848	1.329	0				-1	-1	-1	1	-1	1	1	1	-1	-1
676	3047	C	C2	BM05737	H	H2	7	1	SC	SD	0.492361	28.88	0.484028	28.9	66	0.442361	30.339				1.459	0				-1	1	1	-1	-1	-1	1	-1	1	1
674	3058	C	C4	BM06241	H	H2	6	1	IVC	SD	0.340972	22.99	0.352778	23.12	66	0.376389	24.342	6.33369	4.40994	69.6267	1.352	1				-1	1	1	1	-1	-1	1	-1	-1	1
699	3060	C	C4	BM06241	H	H1	6	0	SC	SD	0.498611	19.12	0.488194	19.99	66	0.45625	20.311				1.191	1				-1	1	-1	-1	-1	-1	1	-1	1	1
670	3063	C	C4	BM06229	C	C1	5	0	SC	SD	0.491667	23.03	0.483333	22.84	66	0.440972	22.877				-0.153	0				-1	-1	-1	-1	-1	1	1	1	1	-1
686	3065	C	C4	BM06229	C	C2	5	1	SC	SD	0.49375	25.48	0.484722	25.57	66	0.446528	24.805				-0.675	0				-1	-1	1	-1	-1	1	1	1	1	-1
688	3070	C	C3	BM05957	C	C2	7	1	SC	SD	0.494444	19.23	0.485417	19.36	66	0.448611	21.223				1.993	0				-1	-1	1	-1	-1	1	1	1	1	-1
700	3078	H	H1	BM05270	C	C4	4	0	IVC	SD	0.347917	27.09	0.359722	27	66	0.392361	28.074	7.09624	5.44499	76.7306	0.984	0				1	-1	-1	1	-1	-1	-1	1	-1	1
703	3087	C	C1	BM05477	H	H4	3	0	SC	SD	0.499306	20.82	0.488889	21.74	66	0.458333	21.382				0.562	0				-1	1	-1	-1	-1	-1	1	-1	1	1
682	3088	C	C1	BM05477	H	H1	3	1	IVC	SD	0.341667	23.08	0.354167	22.85	66	0.379167	23.875	5.0436	4.15935	82.4679	0.795	0				-1	1	1	1	-1	-1	1	-1	-1	1
704	3118	H	H4	BM06791	C	C1	4	0	IVC	SD	0.345139	26.56	0.343056	26.62	67	0.392361	28.275	8.13027	5.77377	71.0157	1.715	0				1	-1	-1	1	-1	-1	-1	1	-1	1
692	3169	H	H2	BM05819	H	H4	6	0	SC	SD	0.490278	23.3	0.45	23.35	67	0.457639	24.112				0.812	0				1	1	-1	-1	-1	1	-1	-1	1	-1
702	3177	H	H1	BM06484	C	C3	5	0	SC	SD	0.490972	20.64	0.45	20.73	67	0.461806	21.784				1.144	0				1	-1	-1	-1	-1	-1	-1	1	1	1
706	3221	H	H3	BM05866	H	H4	3	0	SC	SD	0.491667	22.07	0.450694	22.21	67	0.465972	24.031				1.961	0				1	1	-1	-1	-1	1	-1	-1	1	-1
713	3239	C	C2	BM04641	C	C3	4	0	IVC	SD	0.350694	23.65	0.347917	24.03	67	0.411111	24.837	4.98265	4.0044	80.3669	1.187	0				-1	-1	-1	1	-1	1	1	1	-1	-1
715	3249	C	C3	BM05749	H	H1	6	0	IVC	SD	0.3375	18.18	0.347917	18.67	68	0.371528	18.726	4.33913	3.26738	75.3004	0.546	0				-1	1	-1	1	-1	-1	1	-1	-1	1
717	3256	C	C4	BM06696	H	H2	5	0	IVC	SD	0.338889	20.95	0.348611	21.31	68	0.375694	21.637	5.11039	3.84739	75.2857	0.687	0				-1	1	-1	1	-1	-1	1	-1	-1	1
723	3288	H	H3	BM05838	C	C2	6	1	SC	SD	0.459722	25.82	0.452083	26.58	68	0.483333	27.791				1.971	0				1	-1	1	-1	-1	-1	-1	1	1	1
716	3291	H	H1	BM06558	C	C3	4	0	SC	SD	0.457639	22.48	0.45	23.34	68	0.472222	22.497				0.017	0				1	-1	-1	-1	-1	-1	-1	1	1	1
725	3294	H	H1	BM06558	C	C2	4	1	IVC	SD	0.340972	31.27	0.350694	30.94	68	0.383333	32.764	8.14936	6.25961	76.8111	1.494	0				1	-1	1	1	-1	-1	-1	1	-1	1
729	3318	H	H1	BM06796	C	C4	5	1	SC	SD	0.4625	25.5	0.454861	26.03	68	0.490278	28.213				2.713	0				1	-1	1	-1	-1	-1	-1	1	1	1
733	3350	H	H2	BM05332	H	H3	6	1	SC	SD	0.459722	23.86	0.481944	23.47	69	0.44375	24.29				0.43	0				1	1	1	-1	-1	1	-1	-1	1	-1
730	3360	C	C4	BM05546	H	H1	5	1	IVC	SD	0.343056	27.05	0.352083	27.23	69	0.407639	29.162	6.51269	4.74869	72.9144	2.112	1				-1	1	1	1	-1	-1	1	-1	-1	1
724	3364	C	C2	BM06859	H	H3	7	1	IVC	SD	0.340972	25.38	0.35	25.79	69	0.399306	26.398	5.79048	4.26448	73.6464	1.018	0				-1	1	1	1	-1	-1	1	-1	-1	1
726	3369	C	C2	BM06859	H	H1	7	1	SC	SD	0.457639	22.02	0.480556	22.13	69	0.434722	23.246				1.226	1		1		-1	1	1	-1	-1	-1	1	-1	1	1
734	3372	H	H3	BM04825	H	H2	3	1	IVC	SD	0.345833	24.82	0.354167	25.31	69	0.415972	26.68	6.45152	4.85677	75.281	1.86	0				1	1	1	1	-1	1	-1	-1	-1	-1
737	3395	H	H3	BM05198	H	H1	5	1	SC	SD	0.483333	25.8	0.479167	26.09	70	0.430556	27.532				1.732	0				1	1	1	-1	-1	1	-1	-1	1	-1
739	3398	H	H3	BM05198	C	C3	5	1	IVC	SD	0.346528	26.92	0.346528	26.94	70	0.420833	29.928	7.55733	5.73533	75.891	3.008	0				1	-1	1	1	-1	-1	-1	1	-1	1
745	3404	C	C2	BM06769	C	C1	5	1	SC	SD	0.482639	25.66	0.450694	25.81	71	0.458333	26.511				0.851	0				-1	-1	1	-1	-1	1	1	1	1	-1
747	3405	C	C2	BM06769	C	C3	5	1	SC	SD	0.483333	28.33	0.451389	28.82	71	0.4625	29.262				0.932	0				-1	-1	1	-1	-1	1	1	1	1	-1
749	3411	C	C2	BM05536	C	C1	5	0	SC	SD	0.484028	22.28	0.452083	22.69	71	0.465278	23.361				1.081	0				-1	-1	-1	-1	-1	1	1	1	1	-1
744	3424	C	C3	BM06618	H	H1	5	0	SC	SD	0.48125	14.95	0.450694	14.7	71	0.454861	14.993				0.043	0				-1	1	-1	-1	-1	-1	1	-1	1	1
752	3456	C	C3	BM06103	C	C1	7	0	SC	SD	0.445833	17.45	0.4625	17.39	73	0.429167	17.627				0.177	0				-1	-1	-1	-1	-1	1	1	1	1	-1
759	3458	H	H2	BM05330	H	H3	6	1	IVC	SD	0.400694	24.76	0.375	25.01	73	0.422222	25.479	4.98206	3.99381	80.1638	0.719	0				1	1	1	1	-1	1	-1	-1	-1	-1
758	3460	H	H2	BM05330	C	C3	6	1	IVC	SD	0.399306	25.04	0.374306	25.26	73	0.418056	28.596	7.08779	5.41904	76.456	3.556	0				1	-1	1	1	-1	-1	-1	1	-1	1
763	3465	H	H3	BM06844	H	H1	4	0	SC	SD	0.466667	16.79	0.443056	17.04	74	0.461111	16.979				0.189	0				1	1	-1	-1	-1	1	-1	-1	1	-1
760	3466	H	H3	BM06844	H	H2	4	1	SC	SD	0.465972	22.2	0.442361	22.35	74	0.457639	24.186				1.986	0				1	1	1	-1	-1	1	-1	-1	1	-1
765	3475	C	C1	BM06269	C	C3	7	1	IVC	SD	0.377778	21.15	0.388194	20.78	74	0.402083	21.565	4.55969	3.63919	79.8122	0.415	0				-1	-1	1	1	-1	1	1	1	-1	-1
762	3476	C	C1	BM06269	H	H2	7	0	IVC	SD	0.376389	17.45	0.3875	16.74	74	0.397917	17.34	4.28736	3.34036	77.9118	-0.11	0				-1	1	-1	1	-1	-1	1	-1	-1	1
769	3493	C	C3	BM04219	C	C4	7	0	SC	SD	0.46875	19.19	0.445139	19.75	74	0.46875	19.865				0.675	0		1		-1	-1	-1	-1	-1	1	1	1	1	-1
771	3504	H	H1	BM05826	C	C4	5	1	IVC	SD	0.39375	24.93	0.386806	24.15	75	0.4125	25.58	6.82608	4.93633	72.3157	0.65	0				1	-1	1	1	-1	-1	-1	1	-1	1
773	3505	H	H1	BM05826	C	C1	5	1	IVC	SD	0.394444	25.69	0.3875	25.64	75	0.415278	27.343	6.13114	4.88939	79.7468	1.653	0				1	-1	1	1	-1	-1	-1	1	-1	1
775	3507	H	H1	BM05826	H	H4	5	1	IVC	SD	0.397917	23.26	0.388889	23.24	75	0.417361	23.814	6.14085	4.5621	74.291	0.554	0				1	1	1	1	-1	1	-1	-1	-1	-1
772	3508	C	C4	BM04982	H	H1	5	1	SC	SD	0.445833	26.16	0.440972	25.98	75	0.457639	25.609				-0.551	1				-1	1	1	-1	-1	-1	1	-1	1	1
777	3512	C	C4	BM04982	H	H4	5	1	SC	SD	0.447222	21.28	0.440972	21.54	75	0.461111	23.466				2.186	1				-1	1	1	-1	-1	-1	1	-1	1	1
774	3539	C	C1	BM06437	H	H1	6	1	SC	SD	0.442361	18.08	0.454861	18.17	76	0.423611	18.729				0.649	0				-1	1	1	-1	-1	-1	1	-1	1	1
776	3546	H	H4	BM06872	H	H1	7	1	SC	SD	0.44375	18.18	0.455556	18.16	76	0.427778	19.033				0.853	0				1	1	1	-1	-1	1	-1	-1	1	-1
781	3565	H	H2	BM05907	C	C4	7	0	IVC	SD	0.382639	21.74	0.388889	22	77	0.415278	23.567				1.827	0				1	-1	-1	1	-1	-1	-1	1	-1	1
784	3579	H	H4	BM05929	H	H2	2	0	IVC	SD	0.384028	22.46	0.389583	22.82	77	0.419444	23.663	6.60346	4.95796	75.0812	1.203	0				1	1	-1	1	-1	1	-1	-1	-1	-1
782	3596	C	C4	BM04056	H	H2	6	0	SC	SD	0.465278	20.13	0.444444	19.82	78	0.470833	20.83				0.7	0				-1	1	-1	-1	-1	-1	1	-1	1	1
795	3604	C	C3	BM05651	H	H3	5	1	IVC	SD	0.397222	17.6	0.374306	17.31	78	0.440972	17.144	4.15171	3.30846	79.6891	-0.456	0				-1	1	1	1	-1	-1	1	-1	-1	1
799	3605	C	C3	BM05651	H	H3	5	0	SC	SD	0.470833	17.89	0.448611	17.44	78	0.490972	17.134				-0.756	0				-1	1	-1	-1	-1	-1	1	-1	1	1
790	3606	C	C3	BM05651	C	C4	5	1	IVC	SD	0.393056	21.65	0.371528	20.92	78	0.429167	21.78	5.31724	4.29174	80.7137	0.13	0				-1	-1	1	1	-1	1	1	1	-1	-1
788	3618	H	H3	BM06811	H	H4	5	1	IVC	SD	0.392361	20.43	0.370139	20.35	78	0.425694	21.319	4.45843	3.56518	79.9649	0.889	0				1	1	1	1	-1	1	-1	-1	-1	-1
801	3621	H	H3	BM06367	C	C2	4	1	SC	SD	0.450694	26.7	0.441667	26.25	79	0.454861	27.823				1.123	0				1	-1	1	-1	-1	-1	-1	1	1	1
802	3643	C	C2	BM06306	H	H3	6	1	IVC	SD	0.377778	22.66	0.380556	22.72	79	0.442361	24.263	5.50431	4.24406	77.1043	1.603	0				-1	1	1	1	-1	-1	1	-1	-1	1
805	3653	H	H1	BM05271	H	H4	6	1	SC	SD	0.443056	23.71	0.457639	24.09	80	0.434028	25.025				1.315	0				1	1	1	-1	-1	1	-1	-1	1	-1
807	3654	H	H1	BM05271	C	C2	6	1	SC	SD	0.44375	26.87	0.458333	27.46	80	0.4375	28.391				1.521	0				1	-1	1	-1	-1	-1	-1	1	1	1
815	3658	H	H1	BM05271	H	H2	6	1	SC	SD	0.447917	24.56	0.461111	24.84	80	0.452083	26.411				1.851	0				1	1	1	-1	-1	1	-1	-1	1	-1
821	3670	H	H3	BM06795	C	C1	5	0	IVC	SD	0.3875	22.99	0.390972	25.06	80	0.424306	26.263	5.74252	4.36452	76.0036	3.273	0				1	-1	-1	1	-1	-1	-1	1	-1	1
810	3671	H	H3	BM06795	H	H1	5	0	IVC	SD	0.383333	24.55	0.386806	24.19	80	0.408333	25.685	6.06349	4.71374	77.7397	1.135	0				1	1	-1	1	-1	1	-1	-1	-1	-1
823	3673	C	C2	BM06752	H	H3	4	1	SC	SD	0.45	26.85	0.463194	26.6	80	0.461806	26.771				-0.079	0				-1	1	1	-1	-1	-1	1	-1	1	1
814	3674	C	C2	BM06752	H	H1	4	1	IVC	SD	0.384722	25.57	0.388194	25.93	80	0.411806	27.61	6.72404	5.11354	76.0486	2.04	0				-1	1	1	1	-1	-1	1	-1	-1	1
806	3677	H	H4	BM06362	H	H1	5	1	IVC	SD	0.382639	28.09	0.386111	28.19	80	0.403472	28.255	8.33609	5.61634	67.3738	0.165	0			1	1	1	1	1	-1	1	-1	-1	-1	-1
804	3679	H	H4	BM06362	H	H3	5	0	IVC	SD	0.381944	22.26	0.384722	22.28	80	0.398611	23.913	6.09487	4.78962	78.5844	1.653	0				1	1	-1	1	-1	1	-1	-1	-1	-1
828	3751	C	C1	BM05754	H	H4	6	1	SC	SD	0.465278	21.64	0.45625	21.37	81	0.465972	21.59				-0.05	0				-1	1	1	-1	-1	-1	1	-1	1	1
833	3756	H	H2	BM05910	C	C3	3	0	SC	SD	0.467361	23.23	0.458333	23.29	81	0.479167	24.624				1.394	0				1	-1	-1	-1	-1	-1	-1	1	1	1
816	3757	H	H2	BM05910	H	H1	3	1	IVC	SD	0.395833	30.43	0.382639	31.94	81	0.422222	33.477	8.76348	6.28323	71.6979	3.047	0				1	1	1	1	-1	1	-1	-1	-1	-1
830	3772	C	C1	BM06245	C	C2	4	1	SC	SD	0.465972	20.01	0.456944	20.47	81	0.470139	21.367				1.357	0				-1	-1	1	-1	-1	1	1	1	1	-1
838	3773	C	C1	BM06245	H	H3	4	1	IVC	SD	0.400694	20.35	0.386111	21.17	81	0.440278	22.286	4.74113	3.85263	81.2597	1.936	0				-1	1	1	1	-1	-1	1	-1	-1	1
839	3795	C	C3	BM04517	H	H4	6	0	SC	SD	0.460417	19.78	0.456944	19.61	82	0.4625	19.365				-0.415	0				-1	1	-1	-1	-1	-1	1	-1	1	1
832	3796	C	C3	BM04517	C	C1	6	1	IVC	SD	0.386806	22.54	0.397917	22.56	82	0.397917	22.709	4.661	3.73	80.0258	0.169	0				-1	-1	1	1	-1	1	1	1	-1	-1
843	3811	H	H3	BM04824	C	C3	5	1	SC	SD	0.461111	25.9	0.457639	26.12	82	0.467361	28.093				2.193	0				1	-1	1	-1	-1	-1	-1	1	1	1
845	3813	H	H3	BM04824	C	C4	5	1	IVC	SD	0.389583	23.87	0.400694	23.9	82	0.411111	25.554	5.49096	4.33796	79.0019	1.684	0				1	-1	1	1	-1	-1	-1	1	-1	1
847	3814	H	H3	BM04824	H	H4	5	0	SC	SD	0.461806	20.46	0.457639	20.32	82	0.470833	21.473				1.013	0				1	1	-1	-1	-1	1	-1	-1	1	-1
849	3855	C	C3	BM06136	C	C4	6	0	IVC	SD	0.392361	19.62	0.405556	19.44	83	0.420139	19.779	4.42698	3.50148	79.0941	0.159	0		1		-1	-1	-1	1	-1	1	1	1	-1	-1
851	3856	C	C3	BM06136	C	C2	6	1	IVC	SD	0.393056	19.6	0.40625	19.43	83	0.424306	19.4	4.08403	3.25928	79.8055	-0.2	0		1		-1	-1	1	1	-1	1	1	1	-1	-1
857	3882	C	C1	BM05968	C	C4	6	1	SC	SD	0.461111	22.73	0.480556	22.22	83	0.458333	23.363				0.633	0				-1	-1	1	-1	-1	1	1	1	1	-1
842	3884	C	C1	BM05968	H	H3	6	0	SC	SD	0.459028	20.46	0.479167	20.47	83	0.445139	20.842				0.382	0				-1	1	-1	-1	-1	-1	1	-1	1	1
860	3889	H	H4	BM05298	C	C1	4	1	SC	SD	0.4625	25.27	0.48125	24.73	83	0.463194	25.54				0.27	0				1	-1	1	-1	-1	-1	-1	1	1	1
865	3909	C	C2	BM06854	C	C1	3	1	IVC	SD	0.413194	21.15	0.4	23.52	84	0.409722	24.737	5.26802	3.72277	70.6674	3.587	0				-1	-1	1	1	-1	1	1	1	-1	-1
869	3927	C	C4	BM05732	C	C2	7	0	IVC	SD	0.415972	19.67	0.40625	19.9	84	0.419444	20.685	5.21	3.96825	76.166	1.015	0				-1	-1	-1	1	-1	1	1	1	-1	-1
871	3957	C	C1	BM06654	H	H4	4	1	IVC	SD	0.416667	24.52	0.407639	24.69	84	0.422917	25.712	6.24296	4.43021	70.9633	1.192	0				-1	1	1	1	-1	-1	1	-1	-1	1
854	3958	C	C1	BM06654	C	C3	4	0	SC	SD	0.474306	16.13	0.4625	16.64	84	0.4375	17.204				1.074	0				-1	-1	-1	-1	-1	1	1	1	1	-1
868	3959	C	C1	BM06654	C	C4	4	0	IVC	SD	0.414583	21.31	0.404861	21.55	84	0.414583	21.443	4.54645	3.7477	82.4313	0.133	0				-1	-1	-1	1	-1	1	1	1	-1	-1
872	3975	H	H4	BM06392	C	C1	7	1	SC	SD	0.477083	23.83	0.467361	24.01	84	0.452083	24.602				0.772	0				1	-1	1	-1	-1	-1	-1	1	1	1
870	4039	C	C2	BM05674	C	C4	4	0	SC	SD	0.46875	21.93	0.453472	21.64	85	0.470833	23.448				1.518	0				-1	-1	-1	-1	-1	1	1	1	1	-1
874	4040	C	C2	BM05674	H	H4	4	1	IVC	SD	0.410417	25.48	0.383333	25.72	85	0.402083	26.875	5.36651	4.11951	76.7633	1.395	0				-1	1	1	1	-1	-1	1	-1	-1	1
877	4041	C	C2	BM05674	C	C4	4	1	SC	SD	0.470833	22.84	0.454861	22.46	85	0.479167	23.108				0.268	0				-1	-1	1	-1	-1	1	1	1	1	-1
876	4049	C	C1	BM06744	C	C2	3	1	SC	SD	0.469444	23.98	0.454167	23.59	85	0.475	24.717				0.737	0				-1	-1	1	-1	-1	1	1	1	1	-1
881	4051	C	C1	BM06744	H	H3	3	0	IVC	SD	0.416667	23.51	0.388889	23.63	85	0.417361	24.328	4.51806	3.57781	79.1891	0.818	0				-1	1	-1	1	-1	-1	1	-1	-1	1
882	4069	H	H3	BM05184	C	C1	4	0	SC	SD	0.45625	21.37	0.451389	21.54	86	0.470833	22.053				0.683	0				1	-1	-1	-1	-1	-1	-1	1	1	1
880	4102	C	C4	BM06693	C	C1	7	1	SC	SD	0.455556	24.64	0.451389	24.83	86	0.466667	24.917				0.277	0				-1	-1	1	-1	-1	1	1	1	1	-1

## Sheet: ASV_Taxonomy
ASV	ITax	tax_full	Phylum	Class	Order	Family	Genus	Species
0009d68441652eceaf44f4c6ab5c778a	376	Bacteria;Desulfobacterota;Desulfovibrionia;Desulfovibrionales;Desulfovibrionaceae;Desulfovibrio;__	Desulfobacterota	Desulfovibrionia	Desulfovibrionales	Desulfovibrionaceae	Desulfovibrio
0012a8dc67b269d1bacc0972bfcffe5a	429	Bacteria;Firmicutes;Clostridia;Christensenellales;Christensenellaceae;__;__	Firmicutes	Clostridia	Christensenellales	Christensenellaceae
00180bf7aa293d77423029e3cc8a9f70	486	Bacteria;Firmicutes;Clostridia;Lachnospirales;Lachnospiraceae;Lachnospiraceae_UCG-001;uncultured_bacterium	Firmicutes	Clostridia	Lachnospirales	Lachnospiraceae	Lachnospiraceae_UCG-001	uncultured_bacterium
00305223c32455d48807694d21dfc3e6	523	Bacteria;Firmicutes;Clostridia;Oscillospirales;Oscillospiraceae;uncultured;uncultured_bacterium	Firmicutes	Clostridia	Oscillospirales	Oscillospiraceae	uncultured	uncultured_bacterium
0040732eec29d3d63d4d156e7fa84791	522	Bacteria;Firmicutes;Clostridia;Oscillospirales;Oscillospiraceae;uncultured;__	Firmicutes	Clostridia	Oscillospirales	Oscillospiraceae	uncultured
0043db4f3a053a87e803b7f39b33150a	487	Bacteria;Firmicutes;Clostridia;Lachnospirales;Lachnospiraceae;Lachnospiraceae_UCG-006;uncultured_bacterium	Firmicutes	Clostridia	Lachnospirales	Lachnospiraceae	Lachnospiraceae_UCG-006	uncultured_bacterium
004b961ca1ed71f2b816234708ef6ea8	500	Bacteria;Firmicutes;Clostridia;Lachnospirales;Lachnospiraceae;uncultured;uncultured_bacterium	Firmicutes	Clostridia	Lachnospirales	Lachnospiraceae	uncultured	uncultured_bacterium
0052ba03388b8e472ee21b7b3707ad2a	516	Bacteria;Firmicutes;Clostridia;Oscillospirales;Oscillospiraceae;UCG-003;uncultured_bacterium	Firmicutes	Clostridia	Oscillospirales	Oscillospiraceae	UCG-003	uncultured_bacterium
005cad52f408aafc03fe1bd56149b5aa	410	Bacteria;Firmicutes;Bacilli;Lactobacillales;Lactobacillaceae;Lactobacillus;__	Firmicutes	Bacilli	Lactobacillales	Lactobacillaceae	Lactobacillus
007841f8d541437dd520df3a8e458299	482	Bacteria;Firmicutes;Clostridia;Lachnospirales;Lachnospiraceae;Lachnospiraceae_NK4A136_group;uncultured_bacterium	Firmicutes	Clostridia	Lachnospirales	Lachnospiraceae	Lachnospiraceae_NK4A136_group	uncultured_bacterium
007ea076f59e8bd66481d6817ad5307f	452	Bacteria;Firmicutes;Clostridia;Lachnospirales;Lachnospiraceae;A2;uncultured_bacterium	Firmicutes	Clostridia	Lachnospirales	Lachnospiraceae	A2	uncultured_bacterium
007fca4b7216dfbb33ae4183189e8e13	415	Bacteria;Firmicutes;Bacilli;Lactobacillales;Streptococcaceae;Streptococcus;__	Firmicutes	Bacilli	Lactobacillales	Streptococcaceae	Streptococcus
0093263348545f0f71e762c82f32ce22	482	Bacteria;Firmicutes;Clostridia;Lachnospirales;Lachnospiraceae;Lachnospiraceae_NK4A136_group;uncultured_bacterium	Firmicutes	Clostridia	Lachnospirales	Lachnospiraceae	Lachnospiraceae_NK4A136_group	uncultured_bacterium
0096ecdfec364b2d636b75718ae8bcf5	523	Bacteria;Firmicutes;Clostridia;Oscillospirales;Oscillospiraceae;uncultured;uncultured_bacterium	Firmicutes	Clostridia	Oscillospirales	Oscillospiraceae	uncultured	uncultured_bacterium
00c54e28e441ba28208d7bf4069b99c2	500	Bacteria;Firmicutes;Clostridia;Lachnospirales;Lachnospiraceae;uncultured;uncultured_bacterium	Firmicutes	Clostridia	Lachnospirales	Lachnospiraceae	uncultured	uncultured_bacterium
00cbd52110d57f3f5e4330e13b233b87	493	Bacteria;Firmicutes;Clostridia;Lachnospirales;Lachnospiraceae;Roseburia;uncultured_bacterium	Firmicutes	Clostridia	Lachnospirales	Lachnospiraceae	Roseburia	uncultured_bacterium
00dca4b37a508a9af4e18b47d272dfeb	486	Bacteria;Firmicutes;Clostridia;Lachnospirales;Lachnospiraceae;Lachnospiraceae_UCG-001;uncultured_bacterium	Firmicutes	Clostridia	Lachnospirales	Lachnospiraceae	Lachnospiraceae_UCG-001	uncultured_bacterium
01020de0fa0013cdda50abad7b1a5ec4	523	Bacteria;Firmicutes;Clostridia;Oscillospirales;Oscillospiraceae;uncultured;uncultured_bacterium	Firmicutes	Clostridia	Oscillospirales	Oscillospiraceae	uncultured	uncultured_bacterium
01151eefa27185c8dcaad1ac6cfb1e30	500	Bacteria;Firmicutes;Clostridia;Lachnospirales;Lachnospiraceae;uncultured;uncultured_bacterium	Firmicutes	Clostridia	Lachnospirales	Lachnospiraceae	uncultured	uncultured_bacterium
013a850d111435d68d7e5ce4d90d6282	534	Bacteria;Firmicutes;Clostridia;Oscillospirales;Ruminococcaceae;Incertae_Sedis;uncultured_bacterium	Firmicutes	Clostridia	Oscillospirales	Ruminococcaceae	Incertae_Sedis	uncultured_bacterium
01459dc08ce8c8b3329805affb7a0146	482	Bacteria;Firmicutes;Clostridia;Lachnospirales;Lachnospiraceae;Lachnospiraceae_NK4A136_group;uncultured_bacterium	Firmicutes	Clostridia	Lachnospirales	Lachnospiraceae	Lachnospiraceae_NK4A136_group	uncultured_bacterium
0146e1c706f9e25576e8f20683213902	498	Bacteria;Firmicutes;Clostridia;Lachnospirales;Lachnospiraceae;__;__	Firmicutes	Clostridia	Lachnospirales	Lachnospiraceae
01607b205b87f4878f5c0809ed3a722f	498	Bacteria;Firmicutes;Clostridia;Lachnospirales;Lachnospiraceae;__;__	Firmicutes	Clostridia	Lachnospirales	Lachnospiraceae
017c039a27a313f69b73b75ca0212083	498	Bacteria;Firmicutes;Clostridia;Lachnospirales;Lachnospiraceae;__;__	Firmicutes	Clostridia	Lachnospirales	Lachnospiraceae
017d3a4f30c6c86510ebf95b7c051dcf	473	Bacteria;Firmicutes;Clostridia;Lachnospirales;Lachnospiraceae;Lachnoclostridium;uncultured_bacterium	Firmicutes	Clostridia	Lachnospirales	Lachnospiraceae	Lachnoclostridium	uncultured_bacterium
018473c67edc05a642b6dfbca81d952f	360	Bacteria;Bacteroidota;Bacteroidia;Bacteroidales;Muribaculaceae;Muribaculaceae;uncultured_bacterium	Bacteroidota	Bacteroidia	Bacteroidales	Muribaculaceae	Muribaculaceae	uncultured_bacterium
018657b9962724ac5f5b6ebdfc9dab25	513	Bacteria;Firmicutes;Clostridia;Oscillospirales;Oscillospiraceae;Oscillibacter;uncultured_bacterium	Firmicutes	Clostridia	Oscillospirales	Oscillospiraceae	Oscillibacter	uncultured_bacterium
01b79acbbb54d968a7699866a4dc1195	452	Bacteria;Firmicutes;Clostridia;Lachnospirales;Lachnospiraceae;A2;uncultured_bacterium	Firmicutes	Clostridia	Lachnospirales	Lachnospiraceae	A2	uncultured_bacterium
01b95c6fdb072135675bab82b53dc999	479	Bacteria;Firmicutes;Clostridia;Lachnospirales;Lachnospiraceae;Lachnospiraceae_FCS020_group;uncultured_bacterium	Firmicutes	Clostridia	Lachnospirales	Lachnospiraceae	Lachnospiraceae_FCS020_group	uncultured_bacterium
01bafd99531467daa14d48725b2d537e	505	Bacteria;Firmicutes;Clostridia;Oscillospirales;Butyricicoccaceae;Butyricicoccus;uncultured_bacterium	Firmicutes	Clostridia	Oscillospirales	Butyricicoccaceae	Butyricicoccus	uncultured_bacterium
01c88ee190c702a3e573aa4f2365e418	500	Bacteria;Firmicutes;Clostridia;Lachnospirales;Lachnospiraceae;uncultured;uncultured_bacterium	Firmicutes	Clostridia	Lachnospirales	Lachnospiraceae	uncultured	uncultured_bacterium
01ca3a2f69524099ee761fdb180b5d4b	498	Bacteria;Firmicutes;Clostridia;Lachnospirales;Lachnospiraceae;__;__	Firmicutes	Clostridia	Lachnospirales	Lachnospiraceae
01d98fffc44108b505ea549b89067802	482	Bacteria;Firmicutes;Clostridia;Lachnospirales;Lachnospiraceae;Lachnospiraceae_NK4A136_group;uncultured_bacterium	Firmicutes	Clostridia	Lachnospirales	Lachnospiraceae	Lachnospiraceae_NK4A136_group	uncultured_bacterium
01d99a3aced558a54bef4878d3242b2d	498	Bacteria;Firmicutes;Clostridia;Lachnospirales;Lachnospiraceae;__;__	Firmicutes	Clostridia	Lachnospirales	Lachnospiraceae
01e025e4021fa527fbb5aba55479a67a	377	Bacteria;Desulfobacterota;Desulfovibrionia;Desulfovibrionales;Desulfovibrionaceae;Desulfovibrio;uncultured_bacterium	Desulfobacterota	Desulfovibrionia	Desulfovibrionales	Desulfovibrionaceae	Desulfovibrio	uncultured_bacterium
01e3894ce273dff453aecc729b15d9df	500	Bacteria;Firmicutes;Clostridia;Lachnospirales;Lachnospiraceae;uncultured;uncultured_bacterium	Firmicutes	Clostridia	Lachnospirales	Lachnospiraceae	uncultured	uncultured_bacterium
021543342296e9c6c71c53339e581f31	534	Bacteria;Firmicutes;Clostridia;Oscillospirales;Ruminococcaceae;Incertae_Sedis;uncultured_bacterium	Firmicutes	Clostridia	Oscillospirales	Ruminococcaceae	Incertae_Sedis	uncultured_bacterium
022722586045f3a390fe2a840b7b6f4a	549	Bacteria;Firmicutes;Clostridia;Peptococcales;Peptococcaceae;uncultured;uncultured_bacterium	Firmicutes	Clostridia	Peptococcales	Peptococcaceae	uncultured	uncultured_bacterium
0228b920ebd170976df75db7b1c7fc33	500	Bacteria;Firmicutes;Clostridia;Lachnospirales;Lachnospiraceae;uncultured;uncultured_bacterium	Firmicutes	Clostridia	Lachnospirales	Lachnospiraceae	uncultured	uncultured_bacterium
025131bd9b63505e9e61188ecf8e45a1	438	Bacteria;Firmicutes;Clostridia;Clostridia_vadinBB60_group;Clostridia_vadinBB60_group;Clostridia_vadinBB60_group;uncultured_bacterium	Firmicutes	Clostridia	Clostridia_vadinBB60_group	Clostridia_vadinBB60_group	Clostridia_vadinBB60_group	uncultured_bacterium
026d74dea5db90437bf9e118201ebc48	360	Bacteria;Bacteroidota;Bacteroidia;Bacteroidales;Muribaculaceae;Muribaculaceae;uncultured_bacterium	Bacteroidota	Bacteroidia	Bacteroidales	Muribaculaceae	Muribaculaceae	uncultured_bacterium
02793b3b7068dee26efe2bc53daef7d4	360	Bacteria;Bacteroidota;Bacteroidia;Bacteroidales;Muribaculaceae;Muribaculaceae;uncultured_bacterium	Bacteroidota	Bacteroidia	Bacteroidales	Muribaculaceae	Muribaculaceae	uncultured_bacterium
028a1525772ea028361ef85a3ed4519f	434	Bacteria;Firmicutes;Clostridia;Clostridia_UCG-014;Clostridia_UCG-014;Clostridia_UCG-014;uncultured_bacterium	Firmicutes	Clostridia	Clostridia_UCG-014	Clostridia_UCG-014	Clostridia_UCG-014	uncultured_bacterium
0298f80aeacaba4d052780854765b800	445	Bacteria;Firmicutes;Clostridia;Lachnospirales;Lachnospiraceae;[Eubacterium]_oxidoreducens_group;uncultured_bacterium	Firmicutes	Clostridia	Lachnospirales	Lachnospiraceae	[Eubacterium]_oxidoreducens_group	uncultured_bacterium
02af414c8233a1d37186134e17c682d0	482	Bacteria;Firmicutes;Clostridia;Lachnospirales;Lachnospiraceae;Lachnospiraceae_NK4A136_group;uncultured_bacterium	Firmicutes	Clostridia	Lachnospirales	Lachnospiraceae	Lachnospiraceae_NK4A136_group	uncultured_bacterium
02b6c4794a5adfbed38972f710d84295	360	Bacteria;Bacteroidota;Bacteroidia;Bacteroidales;Muribaculaceae;Muribaculaceae;uncultured_bacterium	Bacteroidota	Bacteroidia	Bacteroidales	Muribaculaceae	Muribaculaceae	uncultured_bacterium
02c179a1886ac05d026265adf9058ff8	498	Bacteria;Firmicutes;Clostridia;Lachnospirales;Lachnospiraceae;__;__	Firmicutes	Clostridia	Lachnospirales	Lachnospiraceae
02cf454a8bb585ae1e4230f61a1c9509	523	Bacteria;Firmicutes;Clostridia;Oscillospirales;Oscillospiraceae;uncultured;uncultured_bacterium	Firmicutes	Clostridia	Oscillospirales	Oscillospiraceae	uncultured	uncultured_bacterium
02d4a86cb64d0cf3e474471b27821949	500	Bacteria;Firmicutes;Clostridia;Lachnospirales;Lachnospiraceae;uncultured;uncultured_bacterium	Firmicutes	Clostridia	Lachnospirales	Lachnospiraceae	uncultured	uncultured_bacterium
02db4fab12838ddcb418a9acea89ee30	498	Bacteria;Firmicutes;Clostridia;Lachnospirales;Lachnospiraceae;__;__	Firmicutes	Clostridia	Lachnospirales	Lachnospiraceae
02dd59a672fac47f4f763673b3be22aa	411	Bacteria;Firmicutes;Bacilli;Lactobacillales;Lactobacillaceae;Lactobacillus;uncultured_bacterium	Firmicutes	Bacilli	Lactobacillales	Lactobacillaceae	Lactobacillus	uncultured_bacterium
02df9da4a927dc2bccbdfdd2aeb4acdd	482	Bacteria;Firmicutes;Clostridia;Lachnospirales;Lachnospiraceae;Lachnospiraceae_NK4A136_group;uncultured_bacterium	Firmicutes	Clostridia	Lachnospirales	Lachnospiraceae	Lachnospiraceae_NK4A136_group	uncultured_bacterium
02e4ecec2d9bfc2e1509e72702eaf3da	360	Bacteria;Bacteroidota;Bacteroidia;Bacteroidales;Muribaculaceae;Muribaculaceae;uncultured_bacterium	Bacteroidota	Bacteroidia	Bacteroidales	Muribaculaceae	Muribaculaceae	uncultured_bacterium
02e6bcc632a9369a37e729abff12fb9b	509	Bacteria;Firmicutes;Clostridia;Oscillospirales;Oscillospiraceae;Colidextribacter;uncultured_bacterium	Firmicutes	Clostridia	Oscillospirales	Oscillospiraceae	Colidextribacter	uncultured_bacterium
02f7326a8f7fd6543b507f6f10320435	472	Bacteria;Firmicutes;Clostridia;Lachnospirales;Lachnospiraceae;Lachnoclostridium;__	Firmicutes	Clostridia	Lachnospirales	Lachnospiraceae	Lachnoclostridium
02fbd5b720556965e49563beec3814bb	518	Bacteria;Firmicutes;Clostridia;Oscillospirales;Oscillospiraceae;UCG-005;uncultured_bacterium	Firmicutes	Clostridia	Oscillospirales	Oscillospiraceae	UCG-005	uncultured_bacterium
02ff5cd2a8a1c770412a7833e537a852	495	Bacteria;Firmicutes;Clostridia;Lachnospirales;Lachnospiraceae;Tyzzerella;__	Firmicutes	Clostridia	Lachnospirales	Lachnospiraceae	Tyzzerella
0303b2f4a221e26eb412d2d76e334bd6	500	Bacteria;Firmicutes;Clostridia;Lachnospirales;Lachnospiraceae;uncultured;uncultured_bacterium	Firmicutes	Clostridia	Lachnospirales	Lachnospiraceae	uncultured	uncultured_bacterium
030ec21d2a7676700fc3cc8dbfe3a844	500	Bacteria;Firmicutes;Clostridia;Lachnospirales;Lachnospiraceae;uncultured;uncultured_bacterium	Firmicutes	Clostridia	Lachnospirales	Lachnospiraceae	uncultured	uncultured_bacterium
031305fca0d91bb9efa36d641e378225	429	Bacteria;Firmicutes;Clostridia;Christensenellales;Christensenellaceae;__;__	Firmicutes	Clostridia	Christensenellales	Christensenellaceae
032411c3a4b8acf689978d933812af94	419	Bacteria;Firmicutes;Bacilli;RF39;RF39;RF39;uncultured_bacterium	Firmicutes	Bacilli	RF39	RF39	RF39	uncultured_bacterium
03361887781e1bbbfd51f7b778fc0aeb	376	Bacteria;Desulfobacterota;Desulfovibrionia;Desulfovibrionales;Desulfovibrionaceae;Desulfovibrio;__	Desulfobacterota	Desulfovibrionia	Desulfovibrionales	Desulfovibrionaceae	Desulfovibrio
03413b5aa62dcb693c88f305becf4b87	493	Bacteria;Firmicutes;Clostridia;Lachnospirales;Lachnospiraceae;Roseburia;uncultured_bacterium	Firmicutes	Clostridia	Lachnospirales	Lachnospiraceae	Roseburia	uncultured_bacterium
034b55b5ec432a96ebe1edbb06a06788	507	Bacteria;Firmicutes;Clostridia;Oscillospirales;Butyricicoccaceae;UCG-009;uncultured_bacterium	Firmicutes	Clostridia	Oscillospirales	Butyricicoccaceae	UCG-009	uncultured_bacterium
03541500ef22f679673f378ea8d61080	471	Bacteria;Firmicutes;Clostridia;Lachnospirales;Lachnospiraceae;GCA-900066575;uncultured_bacterium	Firmicutes	Clostridia	Lachnospirales	Lachnospiraceae	GCA-900066575	uncultured_bacterium
0355a846fe3dd15adfd430f3531c9376	438	Bacteria;Firmicutes;Clostridia;Clostridia_vadinBB60_group;Clostridia_vadinBB60_group;Clostridia_vadinBB60_group;uncultured_bacterium	Firmicutes	Clostridia	Clostridia_vadinBB60_group	Clostridia_vadinBB60_group	Clostridia_vadinBB60_group	uncultured_bacterium
0364f2e7b72a157a75c58aec6b6a058f	431	Bacteria;Firmicutes;Clostridia;Christensenellales;Christensenellaceae;uncultured;uncultured_bacterium	Firmicutes	Clostridia	Christensenellales	Christensenellaceae	uncultured	uncultured_bacterium
038002f29d3767a7f8fcf5de11da72ac	551	Bacteria;Firmicutes;Clostridia;Peptostreptococcales-Tissierellales;Anaerovoracaceae;[Eubacterium]_nodatum_group;uncultured_bacterium	Firmicutes	Clostridia	Peptostreptococcales-Tissierellales	Anaerovoracaceae	[Eubacterium]_nodatum_group	uncultured_bacterium
0384c06613ffe8648f418e72e08482da	482	Bacteria;Firmicutes;Clostridia;Lachnospirales;Lachnospiraceae;Lachnospiraceae_NK4A136_group;uncultured_bacterium	Firmicutes	Clostridia	Lachnospirales	Lachnospiraceae	Lachnospiraceae_NK4A136_group	uncultured_bacterium
03870c94961f1c9915577e9cdc5351de	486	Bacteria;Firmicutes;Clostridia;Lachnospirales;Lachnospiraceae;Lachnospiraceae_UCG-001;uncultured_bacterium	Firmicutes	Clostridia	Lachnospirales	Lachnospiraceae	Lachnospiraceae_UCG-001	uncultured_bacterium
039c95c55d1ce51f2ed2c7ea7674cb0c	500	Bacteria;Firmicutes;Clostridia;Lachnospirales;Lachnospiraceae;uncultured;uncultured_bacterium	Firmicutes	Clostridia	Lachnospirales	Lachnospiraceae	uncultured	uncultured_bacterium
03a8b00ed14b080c99bcbc68baeb2bd0	544	Bacteria;Firmicutes;Clostridia;Oscillospirales;Ruminococcaceae;uncultured;uncultured_bacterium	Firmicutes	Clostridia	Oscillospirales	Ruminococcaceae	uncultured	uncultured_bacterium
03a97414aaabbfc5c238fb24563dfec1	523	Bacteria;Firmicutes;Clostridia;Oscillospirales;Oscillospiraceae;uncultured;uncultured_bacterium	Firmicutes	Clostridia	Oscillospirales	Oscillospiraceae	uncultured	uncultured_bacterium
03ab01b2a2e9519d25e9c5181c77593e	539	Bacteria;Firmicutes;Clostridia;Oscillospirales;Ruminococcaceae;Ruminococcus;uncultured_bacterium	Firmicutes	Clostridia	Oscillospirales	Ruminococcaceae	Ruminococcus	uncultured_bacterium
03d3dc05f7b863fc81eb7fc8aa7f84a4	500	Bacteria;Firmicutes;Clostridia;Lachnospirales;Lachnospiraceae;uncultured;uncultured_bacterium	Firmicutes	Clostridia	Lachnospirales	Lachnospiraceae	uncultured	uncultured_bacterium
03d6e37427d408650e88bd1de0ea55a7	500	Bacteria;Firmicutes;Clostridia;Lachnospirales;Lachnospiraceae;uncultured;uncultured_bacterium	Firmicutes	Clostridia	Lachnospirales	Lachnospiraceae	uncultured	uncultured_bacterium
03e884833a35d9d2b1ce58b10bff01c7	549	Bacteria;Firmicutes;Clostridia;Peptococcales;Peptococcaceae;uncultured;uncultured_bacterium	Firmicutes	Clostridia	Peptococcales	Peptococcaceae	uncultured	uncultured_bacterium
03ed7c73a8be932a3be4fccb161581aa	482	Bacteria;Firmicutes;Clostridia;Lachnospirales;Lachnospiraceae;Lachnospiraceae_NK4A136_group;uncultured_bacterium	Firmicutes	Clostridia	Lachnospirales	Lachnospiraceae	Lachnospiraceae_NK4A136_group	uncultured_bacterium
03f069b94fd2120eed833ed5a3d1e33f	360	Bacteria;Bacteroidota;Bacteroidia;Bacteroidales;Muribaculaceae;Muribaculaceae;uncultured_bacterium	Bacteroidota	Bacteroidia	Bacteroidales	Muribaculaceae	Muribaculaceae	uncultured_bacterium
03f9bb649a55b91978614a83237e3a51	566	Bacteria;Patescibacteria;Saccharimonadia;Saccharimonadales;Saccharimonadaceae;Candidatus_Saccharimonas;uncultured_bacterium	Patescibacteria	Saccharimonadia	Saccharimonadales	Saccharimonadaceae	Candidatus_Saccharimonas	uncultured_bacterium
03fd3f5ebde21e156ace2e61b8f2cdc8	486	Bacteria;Firmicutes;Clostridia;Lachnospirales;Lachnospiraceae;Lachnospiraceae_UCG-001;uncultured_bacterium	Firmicutes	Clostridia	Lachnospirales	Lachnospiraceae	Lachnospiraceae_UCG-001	uncultured_bacterium
0422bce46dac3f2c010213d84e781d9a	498	Bacteria;Firmicutes;Clostridia;Lachnospirales;Lachnospiraceae;__;__	Firmicutes	Clostridia	Lachnospirales	Lachnospiraceae
042ec32cead05b1a5bcf0bb4b0a73485	523	Bacteria;Firmicutes;Clostridia;Oscillospirales;Oscillospiraceae;uncultured;uncultured_bacterium	Firmicutes	Clostridia	Oscillospirales	Oscillospiraceae	uncultured	uncultured_bacterium
042fc20c3688ebcb920849b241b38729	495	Bacteria;Firmicutes;Clostridia;Lachnospirales;Lachnospiraceae;Tyzzerella;__	Firmicutes	Clostridia	Lachnospirales	Lachnospiraceae	Tyzzerella
043fcf800eda525bfa526ef04c003453	493	Bacteria;Firmicutes;Clostridia;Lachnospirales;Lachnospiraceae;Roseburia;uncultured_bacterium	Firmicutes	Clostridia	Lachnospirales	Lachnospiraceae	Roseburia	uncultured_bacterium
0451e5c5a062e2c328d3cc97af474891	500	Bacteria;Firmicutes;Clostridia;Lachnospirales;Lachnospiraceae;uncultured;uncultured_bacterium	Firmicutes	Clostridia	Lachnospirales	Lachnospiraceae	uncultured	uncultured_bacterium
04649a495277542bedf4776a477c3337	573	Bacteria;Proteobacteria;Alphaproteobacteria;Rickettsiales;uncultured;uncultured;__	Proteobacteria	Alphaproteobacteria	Rickettsiales	uncultured	uncultured
046c07a815da6f7ba049a255bcedb7eb	351	Bacteria;Actinobacteriota;Coriobacteriia;Coriobacteriales;Eggerthellaceae;Enterorhabdus;uncultured_bacterium	Actinobacteriota	Coriobacteriia	Coriobacteriales	Eggerthellaceae	Enterorhabdus	uncultured_bacterium
0475cb8bbb1b6bf365267d2b4e78f19c	493	Bacteria;Firmicutes;Clostridia;Lachnospirales;Lachnospiraceae;Roseburia;uncultured_bacterium	Firmicutes	Clostridia	Lachnospirales	Lachnospiraceae	Roseburia	uncultured_bacterium
0480f17b10f91112a98b3c399e2ff7f1	500	Bacteria;Firmicutes;Clostridia;Lachnospirales;Lachnospiraceae;uncultured;uncultured_bacterium	Firmicutes	Clostridia	Lachnospirales	Lachnospiraceae	uncultured	uncultured_bacterium
048691e7549edd87661d29583dfd35c3	434	Bacteria;Firmicutes;Clostridia;Clostridia_UCG-014;Clostridia_UCG-014;Clostridia_UCG-014;uncultured_bacterium	Firmicutes	Clostridia	Clostridia_UCG-014	Clostridia_UCG-014	Clostridia_UCG-014	uncultured_bacterium
0488a995d4a679c95054e11e4e77e970	376	Bacteria;Desulfobacterota;Desulfovibrionia;Desulfovibrionales;Desulfovibrionaceae;Desulfovibrio;__	Desulfobacterota	Desulfovibrionia	Desulfovibrionales	Desulfovibrionaceae	Desulfovibrio
049a2c19aa6aad4e318f0309a3ecc197	482	Bacteria;Firmicutes;Clostridia;Lachnospirales;Lachnospiraceae;Lachnospiraceae_NK4A136_group;uncultured_bacterium	Firmicutes	Clostridia	Lachnospirales	Lachnospiraceae	Lachnospiraceae_NK4A136_group	uncultured_bacterium
04b26bfcac38b56fc3ee50c4507ec6cf	500	Bacteria;Firmicutes;Clostridia;Lachnospirales;Lachnospiraceae;uncultured;uncultured_bacterium	Firmicutes	Clostridia	Lachnospirales	Lachnospiraceae	uncultured	uncultured_bacterium
04b88902830bdc9834ee4e169e77a250	543	Bacteria;Firmicutes;Clostridia;Oscillospirales;Ruminococcaceae;uncultured;__	Firmicutes	Clostridia	Oscillospirales	Ruminococcaceae	uncultured
04bd8c19aac6d33c60d8eae0a7e9d2c2	470	Bacteria;Firmicutes;Clostridia;Lachnospirales;Lachnospiraceae;GCA-900066575;__	Firmicutes	Clostridia	Lachnospirales	Lachnospiraceae	GCA-900066575
04d04bdb074b3bbd4ecbb31bead1bc2e	498	Bacteria;Firmicutes;Clostridia;Lachnospirales;Lachnospiraceae;__;__	Firmicutes	Clostridia	Lachnospirales	Lachnospiraceae
04e078e27428a4f47b968ed5fb98a8fb	349	Bacteria;Actinobacteriota;Coriobacteriia;Coriobacteriales;Eggerthellaceae;Adlercreutzia;__	Actinobacteriota	Coriobacteriia	Coriobacteriales	Eggerthellaceae	Adlercreutzia
04fbc1d80d13c0bbb1a8e9e61693060c	523	Bacteria;Firmicutes;Clostridia;Oscillospirales;Oscillospiraceae;uncultured;uncultured_bacterium	Firmicutes	Clostridia	Oscillospirales	Oscillospiraceae	uncultured	uncultured_bacterium
05066f21ccd9446f64645eaddaf982f8	523	Bacteria;Firmicutes;Clostridia;Oscillospirales;Oscillospiraceae;uncultured;uncultured_bacterium	Firmicutes	Clostridia	Oscillospirales	Oscillospiraceae	uncultured	uncultured_bacterium
050cdd29f5baefc660ad07503b147c82	438	Bacteria;Firmicutes;Clostridia;Clostridia_vadinBB60_group;Clostridia_vadinBB60_group;Clostridia_vadinBB60_group;uncultured_bacterium	Firmicutes	Clostridia	Clostridia_vadinBB60_group	Clostridia_vadinBB60_group	Clostridia_vadinBB60_group	uncultured_bacterium
0516da090bd81323ea6078a5b3e60a75	548	Bacteria;Firmicutes;Clostridia;Peptococcales;Peptococcaceae;Peptococcus;uncultured_organism	Firmicutes	Clostridia	Peptococcales	Peptococcaceae	Peptococcus	uncultured_organism
052288c2d321c19f378261a3b8157153	540	Bacteria;Firmicutes;Clostridia;Oscillospirales;Ruminococcaceae;UBA1819;__	Firmicutes	Clostridia	Oscillospirales	Ruminococcaceae	UBA1819
0535e7470f8c54c9d336596ec1dd5fb7	500	Bacteria;Firmicutes;Clostridia;Lachnospirales;Lachnospiraceae;uncultured;uncultured_bacterium	Firmicutes	Clostridia	Lachnospirales	Lachnospiraceae	uncultured	uncultured_bacterium
0541a5141143ab4495c14b1fb1eafb3a	471	Bacteria;Firmicutes;Clostridia;Lachnospirales;Lachnospiraceae;GCA-900066575;uncultured_bacterium	Firmicutes	Clostridia	Lachnospirales	Lachnospiraceae	GCA-900066575	uncultured_bacterium
054ff923988f3149da9b52e9ddc29eee	384	Bacteria;Firmicutes;Bacilli;Bacillales;Bacillaceae;Bacillus;__	Firmicutes	Bacilli	Bacillales	Bacillaceae	Bacillus
056ca2ce73c47a599aec6b7eae00ed2d	438	Bacteria;Firmicutes;Clostridia;Clostridia_vadinBB60_group;Clostridia_vadinBB60_group;Clostridia_vadinBB60_group;uncultured_bacterium	Firmicutes	Clostridia	Clostridia_vadinBB60_group	Clostridia_vadinBB60_group	Clostridia_vadinBB60_group	uncultured_bacterium
057e933d84c2042c8d05fb6b656f15a8	513	Bacteria;Firmicutes;Clostridia;Oscillospirales;Oscillospiraceae;Oscillibacter;uncultured_bacterium	Firmicutes	Clostridia	Oscillospirales	Oscillospiraceae	Oscillibacter	uncultured_bacterium
05815304294f175d761c51a9e4f19447	419	Bacteria;Firmicutes;Bacilli;RF39;RF39;RF39;uncultured_bacterium	Firmicutes	Bacilli	RF39	RF39	RF39	uncultured_bacterium
0581ea145e07843e199d068ed2d7a20c	500	Bacteria;Firmicutes;Clostridia;Lachnospirales;Lachnospiraceae;uncultured;uncultured_bacterium	Firmicutes	Clostridia	Lachnospirales	Lachnospiraceae	uncultured	uncultured_bacterium
058bc1d927396640be935d8be03cafb5	534	Bacteria;Firmicutes;Clostridia;Oscillospirales;Ruminococcaceae;Incertae_Sedis;uncultured_bacterium	Firmicutes	Clostridia	Oscillospirales	Ruminococcaceae	Incertae_Sedis	uncultured_bacterium
058cf498c20de51034c4cccb89bca721	498	Bacteria;Firmicutes;Clostridia;Lachnospirales;Lachnospiraceae;__;__	Firmicutes	Clostridia	Lachnospirales	Lachnospiraceae
059363a7c8b4d6a0d4dca2cd5ea852f7	430	Bacteria;Firmicutes;Clostridia;Christensenellales;Christensenellaceae;uncultured;__	Firmicutes	Clostridia	Christensenellales	Christensenellaceae	uncultured
05999fe38eff5819c06a5b15b3104dc2	522	Bacteria;Firmicutes;Clostridia;Oscillospirales;Oscillospiraceae;uncultured;__	Firmicutes	Clostridia	Oscillospirales	Oscillospiraceae	uncultured
05a4861ce9aed68ada9b8d8adb866ded	498	Bacteria;Firmicutes;Clostridia;Lachnospirales;Lachnospiraceae;__;__	Firmicutes	Clostridia	Lachnospirales	Lachnospiraceae
05af70d806dffb000149b857946e5980	376	Bacteria;Desulfobacterota;Desulfovibrionia;Desulfovibrionales;Desulfovibrionaceae;Desulfovibrio;__	Desulfobacterota	Desulfovibrionia	Desulfovibrionales	Desulfovibrionaceae	Desulfovibrio
05b002cc2e4f74a66bddbf9be5fe1b3f	509	Bacteria;Firmicutes;Clostridia;Oscillospirales;Oscillospiraceae;Colidextribacter;uncultured_bacterium	Firmicutes	Clostridia	Oscillospirales	Oscillospiraceae	Colidextribacter	uncultured_bacterium
05b4a9ebd842ac95f59e35b02b9ec38c	438	Bacteria;Firmicutes;Clostridia;Clostridia_vadinBB60_group;Clostridia_vadinBB60_group;Clostridia_vadinBB60_group;uncultured_bacterium	Firmicutes	Clostridia	Clostridia_vadinBB60_group	Clostridia_vadinBB60_group	Clostridia_vadinBB60_group	uncultured_bacterium
05b77abd0eb376844741fd902940a7df	493	Bacteria;Firmicutes;Clostridia;Lachnospirales;Lachnospiraceae;Roseburia;uncultured_bacterium	Firmicutes	Clostridia	Lachnospirales	Lachnospiraceae	Roseburia	uncultured_bacterium
05b8dd445987ece4d40f6c1a0173db2f	482	Bacteria;Firmicutes;Clostridia;Lachnospirales;Lachnospiraceae;Lachnospiraceae_NK4A136_group;uncultured_bacterium	Firmicutes	Clostridia	Lachnospirales	Lachnospiraceae	Lachnospiraceae_NK4A136_group	uncultured_bacterium
05f685f9bd26dddcd4eb01fb36affbd1	372	Bacteria;Deferribacterota;Deferribacteres;Deferribacterales;Deferribacteraceae;Mucispirillum;uncultured_bacterium	Deferribacterota	Deferribacteres	Deferribacterales	Deferribacteraceae	Mucispirillum	uncultured_bacterium
060ec478723b457b3ea544764f376897	519	Bacteria;Firmicutes;Clostridia;Oscillospirales;Oscillospiraceae;UCG-005;uncultured_rumen	Firmicutes	Clostridia	Oscillospirales	Oscillospiraceae	UCG-005	uncultured_rumen
06104ebae727b66fd07016901e539dcd	376	Bacteria;Desulfobacterota;Desulfovibrionia;Desulfovibrionales;Desulfovibrionaceae;Desulfovibrio;__	Desulfobacterota	Desulfovibrionia	Desulfovibrionales	Desulfovibrionaceae	Desulfovibrio
061d89c822301c75c8ad914d05ddc581	523	Bacteria;Firmicutes;Clostridia;Oscillospirales;Oscillospiraceae;uncultured;uncultured_bacterium	Firmicutes	Clostridia	Oscillospirales	Oscillospiraceae	uncultured	uncultured_bacterium
062a735442eb115d7ac1be3d4492db98	463	Bacteria;Firmicutes;Clostridia;Lachnospirales;Lachnospiraceae;Blautia;uncultured_bacterium	Firmicutes	Clostridia	Lachnospirales	Lachnospiraceae	Blautia	uncultured_bacterium
064a3f301f83f64ad8e51dfb8d497df1	498	Bacteria;Firmicutes;Clostridia;Lachnospirales;Lachnospiraceae;__;__	Firmicutes	Clostridia	Lachnospirales	Lachnospiraceae
065851e3664278e4ad2255103d683b4a	482	Bacteria;Firmicutes;Clostridia;Lachnospirales;Lachnospiraceae;Lachnospiraceae_NK4A136_group;uncultured_bacterium	Firmicutes	Clostridia	Lachnospirales	Lachnospiraceae	Lachnospiraceae_NK4A136_group	uncultured_bacterium
06586f946cdf09da5e9e10be0757e25c	482	Bacteria;Firmicutes;Clostridia;Lachnospirales;Lachnospiraceae;Lachnospiraceae_NK4A136_group;uncultured_bacterium	Firmicutes	Clostridia	Lachnospirales	Lachnospiraceae	Lachnospiraceae_NK4A136_group	uncultured_bacterium
065e6f4107b152133fc68d6d0a523aa1	410	Bacteria;Firmicutes;Bacilli;Lactobacillales;Lactobacillaceae;Lactobacillus;__	Firmicutes	Bacilli	Lactobacillales	Lactobacillaceae	Lactobacillus
065ffab08856ea8df8690c2b82027b39	419	Bacteria;Firmicutes;Bacilli;RF39;RF39;RF39;uncultured_bacterium	Firmicutes	Bacilli	RF39	RF39	RF39	uncultured_bacterium
06651a61432aa7e45f7b31fa2d1b0d50	500	Bacteria;Firmicutes;Clostridia;Lachnospirales;Lachnospiraceae;uncultured;uncultured_bacterium	Firmicutes	Clostridia	Lachnospirales	Lachnospiraceae	uncultured	uncultured_bacterium
06674b37c79dfb132aa38d50ebaada01	351	Bacteria;Actinobacteriota;Coriobacteriia;Coriobacteriales;Eggerthellaceae;Enterorhabdus;uncultured_bacterium	Actinobacteriota	Coriobacteriia	Coriobacteriales	Eggerthellaceae	Enterorhabdus	uncultured_bacterium
06868199ae2457dcf98c42935419b640	544	Bacteria;Firmicutes;Clostridia;Oscillospirales;Ruminococcaceae;uncultured;uncultured_bacterium	Firmicutes	Clostridia	Oscillospirales	Ruminococcaceae	uncultured	uncultured_bacterium
068a83da1958c3b58c95334efe1c871d	500	Bacteria;Firmicutes;Clostridia;Lachnospirales;Lachnospiraceae;uncultured;uncultured_bacterium	Firmicutes	Clostridia	Lachnospirales	Lachnospiraceae	uncultured	uncultured_bacterium
06941098a474948651d4676d9e93e4c0	505	Bacteria;Firmicutes;Clostridia;Oscillospirales;Butyricicoccaceae;Butyricicoccus;uncultured_bacterium	Firmicutes	Clostridia	Oscillospirales	Butyricicoccaceae	Butyricicoccus	uncultured_bacterium
0696b1ec7854b3a0df5fa526ebcff38b	498	Bacteria;Firmicutes;Clostridia;Lachnospirales;Lachnospiraceae;__;__	Firmicutes	Clostridia	Lachnospirales	Lachnospiraceae
069a424b27bb56315377a5555f8b0d77	500	Bacteria;Firmicutes;Clostridia;Lachnospirales;Lachnospiraceae;uncultured;uncultured_bacterium	Firmicutes	Clostridia	Lachnospirales	Lachnospiraceae	uncultured	uncultured_bacterium
06a0dc44dfacecf2f64f19e5632d0234	369	Bacteria;Cyanobacteria;Vampirivibrionia;Gastranaerophilales;Gastranaerophilales;Gastranaerophilales;uncultured_bacterium	Cyanobacteria	Vampirivibrionia	Gastranaerophilales	Gastranaerophilales	Gastranaerophilales	uncultured_bacterium
06ada864c0e41b853db679e56e99ec55	452	Bacteria;Firmicutes;Clostridia;Lachnospirales;Lachnospiraceae;A2;uncultured_bacterium	Firmicutes	Clostridia	Lachnospirales	Lachnospiraceae	A2	uncultured_bacterium
06aec2554f8e60dc523e9537343a9e93	351	Bacteria;Actinobacteriota;Coriobacteriia;Coriobacteriales;Eggerthellaceae;Enterorhabdus;uncultured_bacterium	Actinobacteriota	Coriobacteriia	Coriobacteriales	Eggerthellaceae	Enterorhabdus	uncultured_bacterium
06b742201f4e1a29248d94cf4c016bbc	487	Bacteria;Firmicutes;Clostridia;Lachnospirales;Lachnospiraceae;Lachnospiraceae_UCG-006;uncultured_bacterium	Firmicutes	Clostridia	Lachnospirales	Lachnospiraceae	Lachnospiraceae_UCG-006	uncultured_bacterium
06b9b9dd693cc9d3deb466a891b2f4f7	438	Bacteria;Firmicutes;Clostridia;Clostridia_vadinBB60_group;Clostridia_vadinBB60_group;Clostridia_vadinBB60_group;uncultured_bacterium	Firmicutes	Clostridia	Clostridia_vadinBB60_group	Clostridia_vadinBB60_group	Clostridia_vadinBB60_group	uncultured_bacterium
06ec3df540c8ddd10f10f74230c7c89f	360	Bacteria;Bacteroidota;Bacteroidia;Bacteroidales;Muribaculaceae;Muribaculaceae;uncultured_bacterium	Bacteroidota	Bacteroidia	Bacteroidales	Muribaculaceae	Muribaculaceae	uncultured_bacterium
06f8d0c7ca14441deda5b087391d7997	419	Bacteria;Firmicutes;Bacilli;RF39;RF39;RF39;uncultured_bacterium	Firmicutes	Bacilli	RF39	RF39	RF39	uncultured_bacterium
0707feaf8ec0a5432b2a94e468f3db16	493	Bacteria;Firmicutes;Clostridia;Lachnospirales;Lachnospiraceae;Roseburia;uncultured_bacterium	Firmicutes	Clostridia	Lachnospirales	Lachnospiraceae	Roseburia	uncultured_bacterium
07181daf22383c385d6437c16aea22e4	356	Bacteria;Bacteroidota;Bacteroidia;Bacteroidales;F082;F082;__	Bacteroidota	Bacteroidia	Bacteroidales	F082	F082
071cbf0594ac676eaf2ed86b87fad04c	534	Bacteria;Firmicutes;Clostridia;Oscillospirales;Ruminococcaceae;Incertae_Sedis;uncultured_bacterium	Firmicutes	Clostridia	Oscillospirales	Ruminococcaceae	Incertae_Sedis	uncultured_bacterium
071eeab1487b7c45807f506c828d98fd	487	Bacteria;Firmicutes;Clostridia;Lachnospirales;Lachnospiraceae;Lachnospiraceae_UCG-006;uncultured_bacterium	Firmicutes	Clostridia	Lachnospirales	Lachnospiraceae	Lachnospiraceae_UCG-006	uncultured_bacterium
0721fbc4511fb6cd394fa52dfc2a6998	498	Bacteria;Firmicutes;Clostridia;Lachnospirales;Lachnospiraceae;__;__	Firmicutes	Clostridia	Lachnospirales	Lachnospiraceae
072472369fab82c8ff5c494456fcbeb0	482	Bacteria;Firmicutes;Clostridia;Lachnospirales;Lachnospiraceae;Lachnospiraceae_NK4A136_group;uncultured_bacterium	Firmicutes	Clostridia	Lachnospirales	Lachnospiraceae	Lachnospiraceae_NK4A136_group	uncultured_bacterium
072a6a11944862ad0815f33054264a52	447	Bacteria;Firmicutes;Clostridia;Lachnospirales;Lachnospiraceae;[Eubacterium]_xylanophilum_group;uncultured_bacterium	Firmicutes	Clostridia	Lachnospirales	Lachnospiraceae	[Eubacterium]_xylanophilum_group	uncultured_bacterium
072fbb182ec238a5ffab01f9a5910bc6	539	Bacteria;Firmicutes;Clostridia;Oscillospirales;Ruminococcaceae;Ruminococcus;uncultured_bacterium	Firmicutes	Clostridia	Oscillospirales	Ruminococcaceae	Ruminococcus	uncultured_bacterium
073941f832c2610d522bd26837a57fcd	482	Bacteria;Firmicutes;Clostridia;Lachnospirales;Lachnospiraceae;Lachnospiraceae_NK4A136_group;uncultured_bacterium	Firmicutes	Clostridia	Lachnospirales	Lachnospiraceae	Lachnospiraceae_NK4A136_group	uncultured_bacterium
074719867016231c9f216b17fcd26516	498	Bacteria;Firmicutes;Clostridia;Lachnospirales;Lachnospiraceae;__;__	Firmicutes	Clostridia	Lachnospirales	Lachnospiraceae
075295bab6e533047fb18cb2a2882a5a	473	Bacteria;Firmicutes;Clostridia;Lachnospirales;Lachnospiraceae;Lachnoclostridium;uncultured_bacterium	Firmicutes	Clostridia	Lachnospirales	Lachnospiraceae	Lachnoclostridium	uncultured_bacterium
07687ea082d6b251dceee23598c13a35	500	Bacteria;Firmicutes;Clostridia;Lachnospirales;Lachnospiraceae;uncultured;uncultured_bacterium	Firmicutes	Clostridia	Lachnospirales	Lachnospiraceae	uncultured	uncultured_bacterium
07a94bc075328bdfa73fcabdc94e7598	376	Bacteria;Desulfobacterota;Desulfovibrionia;Desulfovibrionales;Desulfovibrionaceae;Desulfovibrio;__	Desulfobacterota	Desulfovibrionia	Desulfovibrionales	Desulfovibrionaceae	Desulfovibrio
07bd292cc11395a6455105026f64a1be	419	Bacteria;Firmicutes;Bacilli;RF39;RF39;RF39;uncultured_bacterium	Firmicutes	Bacilli	RF39	RF39	RF39	uncultured_bacterium
07f468f1fc88935ee7bbee241262d8c5	523	Bacteria;Firmicutes;Clostridia;Oscillospirales;Oscillospiraceae;uncultured;uncultured_bacterium	Firmicutes	Clostridia	Oscillospirales	Oscillospiraceae	uncultured	uncultured_bacterium
07fdce44c00ae7a849354970f73245ac	349	Bacteria;Actinobacteriota;Coriobacteriia;Coriobacteriales;Eggerthellaceae;Adlercreutzia;__	Actinobacteriota	Coriobacteriia	Coriobacteriales	Eggerthellaceae	Adlercreutzia
08068f4bd3ab021265800d1223e41f43	498	Bacteria;Firmicutes;Clostridia;Lachnospirales;Lachnospiraceae;__;__	Firmicutes	Clostridia	Lachnospirales	Lachnospiraceae
080c6627f601ce10c72613bc1ea53e95	376	Bacteria;Desulfobacterota;Desulfovibrionia;Desulfovibrionales;Desulfovibrionaceae;Desulfovibrio;__	Desulfobacterota	Desulfovibrionia	Desulfovibrionales	Desulfovibrionaceae	Desulfovibrio
0810f8707a6e7af4171b7c0e05a70bdd	544	Bacteria;Firmicutes;Clostridia;Oscillospirales;Ruminococcaceae;uncultured;uncultured_bacterium	Firmicutes	Clostridia	Oscillospirales	Ruminococcaceae	uncultured	uncultured_bacterium
08294818a1a4d2ad8e9a28cce866f81f	500	Bacteria;Firmicutes;Clostridia;Lachnospirales;Lachnospiraceae;uncultured;uncultured_bacterium	Firmicutes	Clostridia	Lachnospirales	Lachnospiraceae	uncultured	uncultured_bacterium
085424519cea4c87259cd5c80525f92f	600	Bacteria;__;__;__;__;__;__
0861eacdb67a631ec2c1561af24132f2	438	Bacteria;Firmicutes;Clostridia;Clostridia_vadinBB60_group;Clostridia_vadinBB60_group;Clostridia_vadinBB60_group;uncultured_bacterium	Firmicutes	Clostridia	Clostridia_vadinBB60_group	Clostridia_vadinBB60_group	Clostridia_vadinBB60_group	uncultured_bacterium
086379d32f14a89275d122958ae3f24c	419	Bacteria;Firmicutes;Bacilli;RF39;RF39;RF39;uncultured_bacterium	Firmicutes	Bacilli	RF39	RF39	RF39	uncultured_bacterium
08644f210e9c84e2723bb3fcb9133868	578	Bacteria;Proteobacteria;Gammaproteobacteria;Burkholderiales;Oxalobacteraceae;Oxalobacter;__	Proteobacteria	Gammaproteobacteria	Burkholderiales	Oxalobacteraceae	Oxalobacter
08685807e0973f414a00f97d24a6fed4	360	Bacteria;Bacteroidota;Bacteroidia;Bacteroidales;Muribaculaceae;Muribaculaceae;uncultured_bacterium	Bacteroidota	Bacteroidia	Bacteroidales	Muribaculaceae	Muribaculaceae	uncultured_bacterium
086ffb9fb5afc7b071c13b94bfdb1561	523	Bacteria;Firmicutes;Clostridia;Oscillospirales;Oscillospiraceae;uncultured;uncultured_bacterium	Firmicutes	Clostridia	Oscillospirales	Oscillospiraceae	uncultured	uncultured_bacterium
087a6a5167afc4a9889d83a95b89ad74	376	Bacteria;Desulfobacterota;Desulfovibrionia;Desulfovibrionales;Desulfovibrionaceae;Desulfovibrio;__	Desulfobacterota	Desulfovibrionia	Desulfovibrionales	Desulfovibrionaceae	Desulfovibrio
08826c2e46a2547970f187a0806913e4	377	Bacteria;Desulfobacterota;Desulfovibrionia;Desulfovibrionales;Desulfovibrionaceae;Desulfovibrio;uncultured_bacterium	Desulfobacterota	Desulfovibrionia	Desulfovibrionales	Desulfovibrionaceae	Desulfovibrio	uncultured_bacterium
0891a255ad890e6c77070fba11128267	482	Bacteria;Firmicutes;Clostridia;Lachnospirales;Lachnospiraceae;Lachnospiraceae_NK4A136_group;uncultured_bacterium	Firmicutes	Clostridia	Lachnospirales	Lachnospiraceae	Lachnospiraceae_NK4A136_group	uncultured_bacterium
0893c063f5107bbb70406a3d9e17a875	482	Bacteria;Firmicutes;Clostridia;Lachnospirales;Lachnospiraceae;Lachnospiraceae_NK4A136_group;uncultured_bacterium	Firmicutes	Clostridia	Lachnospirales	Lachnospiraceae	Lachnospiraceae_NK4A136_group	uncultured_bacterium
089f6c959e336185be186d458a094db1	498	Bacteria;Firmicutes;Clostridia;Lachnospirales;Lachnospiraceae;__;__	Firmicutes	Clostridia	Lachnospirales	Lachnospiraceae
08a0b6516456b577d67e8d5408dd84be	482	Bacteria;Firmicutes;Clostridia;Lachnospirales;Lachnospiraceae;Lachnospiraceae_NK4A136_group;uncultured_bacterium	Firmicutes	Clostridia	Lachnospirales	Lachnospiraceae	Lachnospiraceae_NK4A136_group	uncultured_bacterium
08b3b1f10551c7e3745c2d1a2b1575c3	509	Bacteria;Firmicutes;Clostridia;Oscillospirales;Oscillospiraceae;Colidextribacter;uncultured_bacterium	Firmicutes	Clostridia	Oscillospirales	Oscillospiraceae	Colidextribacter	uncultured_bacterium
08c1d3705c41e705819939d7b2a4403e	498	Bacteria;Firmicutes;Clostridia;Lachnospirales;Lachnospiraceae;__;__	Firmicutes	Clostridia	Lachnospirales	Lachnospiraceae
08cd5bfbb8c946e7c5e052ed8b7bc299	434	Bacteria;Firmicutes;Clostridia;Clostridia_UCG-014;Clostridia_UCG-014;Clostridia_UCG-014;uncultured_bacterium	Firmicutes	Clostridia	Clostridia_UCG-014	Clostridia_UCG-014	Clostridia_UCG-014	uncultured_bacterium
08f4f90d909c7780a5a53830bb4ac3b1	500	Bacteria;Firmicutes;Clostridia;Lachnospirales;Lachnospiraceae;uncultured;uncultured_bacterium	Firmicutes	Clostridia	Lachnospirales	Lachnospiraceae	uncultured	uncultured_bacterium
08f89ad7584ad94d49c826ff0648af17	523	Bacteria;Firmicutes;Clostridia;Oscillospirales;Oscillospiraceae;uncultured;uncultured_bacterium	Firmicutes	Clostridia	Oscillospirales	Oscillospiraceae	uncultured	uncultured_bacterium
08fa658914caae778fd8e77eed68f1a2	566	Bacteria;Patescibacteria;Saccharimonadia;Saccharimonadales;Saccharimonadaceae;Candidatus_Saccharimonas;uncultured_bacterium	Patescibacteria	Saccharimonadia	Saccharimonadales	Saccharimonadaceae	Candidatus_Saccharimonas	uncultured_bacterium
0914bda6d7a8c266a8b0a0ce8f4e7c62	499	Bacteria;Firmicutes;Clostridia;Lachnospirales;Lachnospiraceae;uncultured;__	Firmicutes	Clostridia	Lachnospirales	Lachnospiraceae	uncultured
092141ef8cd30f13f91c4754db8cf7be	557	Bacteria;Firmicutes;Clostridia;Peptostreptococcales-Tissierellales;Anaerovoracaceae;__;__	Firmicutes	Clostridia	Peptostreptococcales-Tissierellales	Anaerovoracaceae
092a88bb1985f3293c8f4b28d7ab4ca0	447	Bacteria;Firmicutes;Clostridia;Lachnospirales;Lachnospiraceae;[Eubacterium]_xylanophilum_group;uncultured_bacterium	Firmicutes	Clostridia	Lachnospirales	Lachnospiraceae	[Eubacterium]_xylanophilum_group	uncultured_bacterium
092e494c84b4a71fa7d2b57a2d44c846	493	Bacteria;Firmicutes;Clostridia;Lachnospirales;Lachnospiraceae;Roseburia;uncultured_bacterium	Firmicutes	Clostridia	Lachnospirales	Lachnospiraceae	Roseburia	uncultured_bacterium
093c76ec9e7a94480cba13244f945b68	522	Bacteria;Firmicutes;Clostridia;Oscillospirales;Oscillospiraceae;uncultured;__	Firmicutes	Clostridia	Oscillospirales	Oscillospiraceae	uncultured
09582bb9a8ca1303578c1ac3def56100	481	Bacteria;Firmicutes;Clostridia;Lachnospirales;Lachnospiraceae;Lachnospiraceae_NK4A136_group;__	Firmicutes	Clostridia	Lachnospirales	Lachnospiraceae	Lachnospiraceae_NK4A136_group
096386e18a47883ff2f810084c386f8b	523	Bacteria;Firmicutes;Clostridia;Oscillospirales;Oscillospiraceae;uncultured;uncultured_bacterium	Firmicutes	Clostridia	Oscillospirales	Oscillospiraceae	uncultured	uncultured_bacterium
0965cf734618afcc95f9baddbc463b52	482	Bacteria;Firmicutes;Clostridia;Lachnospirales;Lachnospiraceae;Lachnospiraceae_NK4A136_group;uncultured_bacterium	Firmicutes	Clostridia	Lachnospirales	Lachnospiraceae	Lachnospiraceae_NK4A136_group	uncultured_bacterium
0967c29bf02584787403f01c3e30af37	543	Bacteria;Firmicutes;Clostridia;Oscillospirales;Ruminococcaceae;uncultured;__	Firmicutes	Clostridia	Oscillospirales	Ruminococcaceae	uncultured
09824cd154ac02510ac4d61e80723df9	498	Bacteria;Firmicutes;Clostridia;Lachnospirales;Lachnospiraceae;__;__	Firmicutes	Clostridia	Lachnospirales	Lachnospiraceae
09893bf764954c6de6b1a52e3725d3c8	509	Bacteria;Firmicutes;Clostridia;Oscillospirales;Oscillospiraceae;Colidextribacter;uncultured_bacterium	Firmicutes	Clostridia	Oscillospirales	Oscillospiraceae	Colidextribacter	uncultured_bacterium
09be8a00e25b3bde6fe1f75887b3cf11	500	Bacteria;Firmicutes;Clostridia;Lachnospirales;Lachnospiraceae;uncultured;uncultured_bacterium	Firmicutes	Clostridia	Lachnospirales	Lachnospiraceae	uncultured	uncultured_bacterium
09be939228729ae37876dbc0240ed946	534	Bacteria;Firmicutes;Clostridia;Oscillospirales;Ruminococcaceae;Incertae_Sedis;uncultured_bacterium	Firmicutes	Clostridia	Oscillospirales	Ruminococcaceae	Incertae_Sedis	uncultured_bacterium
09c0af1b3dbb6ce13e2b51571135e7b3	587	Bacteria;Proteobacteria;Gammaproteobacteria;Pasteurellales;Pasteurellaceae;Rodentibacter;__	Proteobacteria	Gammaproteobacteria	Pasteurellales	Pasteurellaceae	Rodentibacter
09c23d3f1764232be04196d1567c2a29	360	Bacteria;Bacteroidota;Bacteroidia;Bacteroidales;Muribaculaceae;Muribaculaceae;uncultured_bacterium	Bacteroidota	Bacteroidia	Bacteroidales	Muribaculaceae	Muribaculaceae	uncultured_bacterium
09c54fab6008216399375af3a85926f5	429	Bacteria;Firmicutes;Clostridia;Christensenellales;Christensenellaceae;__;__	Firmicutes	Clostridia	Christensenellales	Christensenellaceae
09c9f4e674b70b87c4425a39a5ca6bad	482	Bacteria;Firmicutes;Clostridia;Lachnospirales;Lachnospiraceae;Lachnospiraceae_NK4A136_group;uncultured_bacterium	Firmicutes	Clostridia	Lachnospirales	Lachnospiraceae	Lachnospiraceae_NK4A136_group	uncultured_bacterium
09d8ca4063b297418e81671e53b719a5	499	Bacteria;Firmicutes;Clostridia;Lachnospirales;Lachnospiraceae;uncultured;__	Firmicutes	Clostridia	Lachnospirales	Lachnospiraceae	uncultured
09ea70101b712a3a04f979dc6198e8cb	355	Bacteria;Bacteroidota;Bacteroidia;Bacteroidales;Bacteroidaceae;Bacteroides;uncultured_bacterium	Bacteroidota	Bacteroidia	Bacteroidales	Bacteroidaceae	Bacteroides	uncultured_bacterium
09ee2091abd47de1ebcd44909ca587d4	473	Bacteria;Firmicutes;Clostridia;Lachnospirales;Lachnospiraceae;Lachnoclostridium;uncultured_bacterium	Firmicutes	Clostridia	Lachnospirales	Lachnospiraceae	Lachnoclostridium	uncultured_bacterium
09ffbd8e4570e0949702bf236363a2e4	544	Bacteria;Firmicutes;Clostridia;Oscillospirales;Ruminococcaceae;uncultured;uncultured_bacterium	Firmicutes	Clostridia	Oscillospirales	Ruminococcaceae	uncultured	uncultured_bacterium
0a168314602e2f1d45a0eea02526019b	410	Bacteria;Firmicutes;Bacilli;Lactobacillales;Lactobacillaceae;Lactobacillus;__	Firmicutes	Bacilli	Lactobacillales	Lactobacillaceae	Lactobacillus
0a2294db52cf794849e4c4af35830a07	482	Bacteria;Firmicutes;Clostridia;Lachnospirales;Lachnospiraceae;Lachnospiraceae_NK4A136_group;uncultured_bacterium	Firmicutes	Clostridia	Lachnospirales	Lachnospiraceae	Lachnospiraceae_NK4A136_group	uncultured_bacterium
0a37f4acaf62672996b92f0ff16cd87e	360	Bacteria;Bacteroidota;Bacteroidia;Bacteroidales;Muribaculaceae;Muribaculaceae;uncultured_bacterium	Bacteroidota	Bacteroidia	Bacteroidales	Muribaculaceae	Muribaculaceae	uncultured_bacterium
0a4e61460635a5ee6963fa334f1735b1	482	Bacteria;Firmicutes;Clostridia;Lachnospirales;Lachnospiraceae;Lachnospiraceae_NK4A136_group;uncultured_bacterium	Firmicutes	Clostridia	Lachnospirales	Lachnospiraceae	Lachnospiraceae_NK4A136_group	uncultured_bacterium
0a5303ef3404966872326a4ec5e91f67	498	Bacteria;Firmicutes;Clostridia;Lachnospirales;Lachnospiraceae;__;__	Firmicutes	Clostridia	Lachnospirales	Lachnospiraceae
0a54dfd62287a904ba6068c2c14ccb5f	493	Bacteria;Firmicutes;Clostridia;Lachnospirales;Lachnospiraceae;Roseburia;uncultured_bacterium	Firmicutes	Clostridia	Lachnospirales	Lachnospiraceae	Roseburia	uncultured_bacterium
0a5aec7faeb7fa2a870aa7af23dafaab	419	Bacteria;Firmicutes;Bacilli;RF39;RF39;RF39;uncultured_bacterium	Firmicutes	Bacilli	RF39	RF39	RF39	uncultured_bacterium
0a83ea328537349954343ac1f5e736df	500	Bacteria;Firmicutes;Clostridia;Lachnospirales;Lachnospiraceae;uncultured;uncultured_bacterium	Firmicutes	Clostridia	Lachnospirales	Lachnospiraceae	uncultured	uncultured_bacterium
0a88c6490d4e4432555bbe44cd8a4800	482	Bacteria;Firmicutes;Clostridia;Lachnospirales;Lachnospiraceae;Lachnospiraceae_NK4A136_group;uncultured_bacterium	Firmicutes	Clostridia	Lachnospirales	Lachnospiraceae	Lachnospiraceae_NK4A136_group	uncultured_bacterium
0a8c5f3e6817b11d31f1b58c30b8c039	500	Bacteria;Firmicutes;Clostridia;Lachnospirales;Lachnospiraceae;uncultured;uncultured_bacterium	Firmicutes	Clostridia	Lachnospirales	Lachnospiraceae	uncultured	uncultured_bacterium
0aa3a8a4b01d09fcb851b29f43ffc6ae	498	Bacteria;Firmicutes;Clostridia;Lachnospirales;Lachnospiraceae;__;__	Firmicutes	Clostridia	Lachnospirales	Lachnospiraceae
0acf387879aeede88d090fc3119f8daf	543	Bacteria;Firmicutes;Clostridia;Oscillospirales;Ruminococcaceae;uncultured;__	Firmicutes	Clostridia	Oscillospirales	Ruminococcaceae	uncultured
0ae0cd289aee153ed3e98f9f9659519f	360	Bacteria;Bacteroidota;Bacteroidia;Bacteroidales;Muribaculaceae;Muribaculaceae;uncultured_bacterium	Bacteroidota	Bacteroidia	Bacteroidales	Muribaculaceae	Muribaculaceae	uncultured_bacterium
0ae1aa2ac615889cb822ae0fef13057c	482	Bacteria;Firmicutes;Clostridia;Lachnospirales;Lachnospiraceae;Lachnospiraceae_NK4A136_group;uncultured_bacterium	Firmicutes	Clostridia	Lachnospirales	Lachnospiraceae	Lachnospiraceae_NK4A136_group	uncultured_bacterium
0ae95d7d0b3f283a55d41704bcb3fbe9	496	Bacteria;Firmicutes;Clostridia;Lachnospirales;Lachnospiraceae;Tyzzerella;uncultured_bacterium	Firmicutes	Clostridia	Lachnospirales	Lachnospiraceae	Tyzzerella	uncultured_bacterium
0af321bcbed60a1dba501c2342e167b1	500	Bacteria;Firmicutes;Clostridia;Lachnospirales;Lachnospiraceae;uncultured;uncultured_bacterium	Firmicutes	Clostridia	Lachnospirales	Lachnospiraceae	uncultured	uncultured_bacterium
0af79c7d115391593d55d02c7bd5c327	484	Bacteria;Firmicutes;Clostridia;Lachnospirales;Lachnospiraceae;Lachnospiraceae_NK4B4_group;uncultured_bacterium	Firmicutes	Clostridia	Lachnospirales	Lachnospiraceae	Lachnospiraceae_NK4B4_group	uncultured_bacterium
0afa2e9133d96a0817bb55560ea61003	546	Bacteria;Firmicutes;Clostridia;Oscillospirales;__;__;__	Firmicutes	Clostridia	Oscillospirales
0aff61daf5b29eef20f55849ea593969	523	Bacteria;Firmicutes;Clostridia;Oscillospirales;Oscillospiraceae;uncultured;uncultured_bacterium	Firmicutes	Clostridia	Oscillospirales	Oscillospiraceae	uncultured	uncultured_bacterium
0b07ce3b98b107577339dd8982f93d38	498	Bacteria;Firmicutes;Clostridia;Lachnospirales;Lachnospiraceae;__;__	Firmicutes	Clostridia	Lachnospirales	Lachnospiraceae
0b1206de81a6564b8fb37b098f4a163e	544	Bacteria;Firmicutes;Clostridia;Oscillospirales;Ruminococcaceae;uncultured;uncultured_bacterium	Firmicutes	Clostridia	Oscillospirales	Ruminococcaceae	uncultured	uncultured_bacterium
0b2f3b55b0958ceb93d90053e32fbdbf	473	Bacteria;Firmicutes;Clostridia;Lachnospirales;Lachnospiraceae;Lachnoclostridium;uncultured_bacterium	Firmicutes	Clostridia	Lachnospirales	Lachnospiraceae	Lachnoclostridium	uncultured_bacterium
0b335b2b1f82542b2c04092e039f4bf7	492	Bacteria;Firmicutes;Clostridia;Lachnospirales;Lachnospiraceae;Roseburia;__	Firmicutes	Clostridia	Lachnospirales	Lachnospiraceae	Roseburia
0b39a9bbff061614e8a7b737eb1dd4cd	552	Bacteria;Firmicutes;Clostridia;Peptostreptococcales-Tissierellales;Anaerovoracaceae;Anaerovorax;__	Firmicutes	Clostridia	Peptostreptococcales-Tissierellales	Anaerovoracaceae	Anaerovorax
0b3a1d65d5e37fa58db326a9ded3ac55	500	Bacteria;Firmicutes;Clostridia;Lachnospirales;Lachnospiraceae;uncultured;uncultured_bacterium	Firmicutes	Clostridia	Lachnospirales	Lachnospiraceae	uncultured	uncultured_bacterium
0b5e2971d1f1ac8689cdaf3087227410	481	Bacteria;Firmicutes;Clostridia;Lachnospirales;Lachnospiraceae;Lachnospiraceae_NK4A136_group;__	Firmicutes	Clostridia	Lachnospirales	Lachnospiraceae	Lachnospiraceae_NK4A136_group
0b640caa5c2c74d945139a52ba364ce1	498	Bacteria;Firmicutes;Clostridia;Lachnospirales;Lachnospiraceae;__;__	Firmicutes	Clostridia	Lachnospirales	Lachnospiraceae
0b73658311a8be1263dbbd5a52cef57e	482	Bacteria;Firmicutes;Clostridia;Lachnospirales;Lachnospiraceae;Lachnospiraceae_NK4A136_group;uncultured_bacterium	Firmicutes	Clostridia	Lachnospirales	Lachnospiraceae	Lachnospiraceae_NK4A136_group	uncultured_bacterium
0b938f163174a79b3ef14c3ace0e171c	438	Bacteria;Firmicutes;Clostridia;Clostridia_vadinBB60_group;Clostridia_vadinBB60_group;Clostridia_vadinBB60_group;uncultured_bacterium	Firmicutes	Clostridia	Clostridia_vadinBB60_group	Clostridia_vadinBB60_group	Clostridia_vadinBB60_group	uncultured_bacterium
0ba97672ef7513f569072d9fb2fc759a	592	Bacteria;Spirochaetota;Brachyspirae;Brachyspirales;Brachyspiraceae;Brachyspira;__	Spirochaetota	Brachyspirae	Brachyspirales	Brachyspiraceae	Brachyspira
0baa499eea8658a3807614d7a0cebbd1	434	Bacteria;Firmicutes;Clostridia;Clostridia_UCG-014;Clostridia_UCG-014;Clostridia_UCG-014;uncultured_bacterium	Firmicutes	Clostridia	Clostridia_UCG-014	Clostridia_UCG-014	Clostridia_UCG-014	uncultured_bacterium
0bad17dfa910de5e6d580586235ab10f	500	Bacteria;Firmicutes;Clostridia;Lachnospirales;Lachnospiraceae;uncultured;uncultured_bacterium	Firmicutes	Clostridia	Lachnospirales	Lachnospiraceae	uncultured	uncultured_bacterium
0bae95638f0b74d8328d2f4dab8ec00d	496	Bacteria;Firmicutes;Clostridia;Lachnospirales;Lachnospiraceae;Tyzzerella;uncultured_bacterium	Firmicutes	Clostridia	Lachnospirales	Lachnospiraceae	Tyzzerella	uncultured_bacterium
0bbc5419365892fccdc8ff65900946d7	377	Bacteria;Desulfobacterota;Desulfovibrionia;Desulfovibrionales;Desulfovibrionaceae;Desulfovibrio;uncultured_bacterium	Desulfobacterota	Desulfovibrionia	Desulfovibrionales	Desulfovibrionaceae	Desulfovibrio	uncultured_bacterium
0bbc8a8288ca745624296e5b708ac7e6	419	Bacteria;Firmicutes;Bacilli;RF39;RF39;RF39;uncultured_bacterium	Firmicutes	Bacilli	RF39	RF39	RF39	uncultured_bacterium
0bbdbd3f15b048c72da28ba7048f70df	498	Bacteria;Firmicutes;Clostridia;Lachnospirales;Lachnospiraceae;__;__	Firmicutes	Clostridia	Lachnospirales	Lachnospiraceae
0bd75bde9855fb0073fd915d84e35a2f	410	Bacteria;Firmicutes;Bacilli;Lactobacillales;Lactobacillaceae;Lactobacillus;__	Firmicutes	Bacilli	Lactobacillales	Lactobacillaceae	Lactobacillus
0c03cd2e786ba4277ca603ed8a72be9e	369	Bacteria;Cyanobacteria;Vampirivibrionia;Gastranaerophilales;Gastranaerophilales;Gastranaerophilales;uncultured_bacterium	Cyanobacteria	Vampirivibrionia	Gastranaerophilales	Gastranaerophilales	Gastranaerophilales	uncultured_bacterium
0c171f902aaac8cc551342e2e19843b8	482	Bacteria;Firmicutes;Clostridia;Lachnospirales;Lachnospiraceae;Lachnospiraceae_NK4A136_group;uncultured_bacterium	Firmicutes	Clostridia	Lachnospirales	Lachnospiraceae	Lachnospiraceae_NK4A136_group	uncultured_bacterium
0c22f8146ad30cc45ad7afc986df65d9	491	Bacteria;Firmicutes;Clostridia;Lachnospirales;Lachnospiraceae;Oribacterium;__	Firmicutes	Clostridia	Lachnospirales	Lachnospiraceae	Oribacterium
0c2924b27fe2013110f743ac5133643a	566	Bacteria;Patescibacteria;Saccharimonadia;Saccharimonadales;Saccharimonadaceae;Candidatus_Saccharimonas;uncultured_bacterium	Patescibacteria	Saccharimonadia	Saccharimonadales	Saccharimonadaceae	Candidatus_Saccharimonas	uncultured_bacterium
0c33ee821892fa187bebf512c03b4065	463	Bacteria;Firmicutes;Clostridia;Lachnospirales;Lachnospiraceae;Blautia;uncultured_bacterium	Firmicutes	Clostridia	Lachnospirales	Lachnospiraceae	Blautia	uncultured_bacterium
0c371933b994fb24ff8e7f1641002c35	482	Bacteria;Firmicutes;Clostridia;Lachnospirales;Lachnospiraceae;Lachnospiraceae_NK4A136_group;uncultured_bacterium	Firmicutes	Clostridia	Lachnospirales	Lachnospiraceae	Lachnospiraceae_NK4A136_group	uncultured_bacterium
0c38367f8902891ee2d8d769d3677830	445	Bacteria;Firmicutes;Clostridia;Lachnospirales;Lachnospiraceae;[Eubacterium]_oxidoreducens_group;uncultured_bacterium	Firmicutes	Clostridia	Lachnospirales	Lachnospiraceae	[Eubacterium]_oxidoreducens_group	uncultured_bacterium
0c40ef47b45a3d431ca5c28fa4df7059	500	Bacteria;Firmicutes;Clostridia;Lachnospirales;Lachnospiraceae;uncultured;uncultured_bacterium	Firmicutes	Clostridia	Lachnospirales	Lachnospiraceae	uncultured	uncultured_bacterium
0c4a1cbac12f383b52044c68450461e3	421	Bacteria;Firmicutes;Bacilli;Staphylococcales;Staphylococcaceae;Jeotgalicoccus;__	Firmicutes	Bacilli	Staphylococcales	Staphylococcaceae	Jeotgalicoccus
0c5c3c2b96f6b7a2c0da15803ab1b00d	493	Bacteria;Firmicutes;Clostridia;Lachnospirales;Lachnospiraceae;Roseburia;uncultured_bacterium	Firmicutes	Clostridia	Lachnospirales	Lachnospiraceae	Roseburia	uncultured_bacterium
0c8b83a0e4f1ba5bf2ccb9dcef4b6892	534	Bacteria;Firmicutes;Clostridia;Oscillospirales;Ruminococcaceae;Incertae_Sedis;uncultured_bacterium	Firmicutes	Clostridia	Oscillospirales	Ruminococcaceae	Incertae_Sedis	uncultured_bacterium
0c9e7ae478f65cc6cc084fe8127ec14a	418	Bacteria;Firmicutes;Bacilli;RF39;RF39;RF39;__	Firmicutes	Bacilli	RF39	RF39	RF39
0ca391f5d64778897b191daded786aa0	438	Bacteria;Firmicutes;Clostridia;Clostridia_vadinBB60_group;Clostridia_vadinBB60_group;Clostridia_vadinBB60_group;uncultured_bacterium	Firmicutes	Clostridia	Clostridia_vadinBB60_group	Clostridia_vadinBB60_group	Clostridia_vadinBB60_group	uncultured_bacterium
0caa6240aedcd86877681b6e3bb8b3c6	498	Bacteria;Firmicutes;Clostridia;Lachnospirales;Lachnospiraceae;__;__	Firmicutes	Clostridia	Lachnospirales	Lachnospiraceae
0cae99680d3acde012f82135bd6ad1ec	542	Bacteria;Firmicutes;Clostridia;Oscillospirales;Ruminococcaceae;__;__	Firmicutes	Clostridia	Oscillospirales	Ruminococcaceae
0cb1e60d003b2db060903df4c731b92a	523	Bacteria;Firmicutes;Clostridia;Oscillospirales;Oscillospiraceae;uncultured;uncultured_bacterium	Firmicutes	Clostridia	Oscillospirales	Oscillospiraceae	uncultured	uncultured_bacterium
0cc0183c6032ee75f65894789ff1c254	544	Bacteria;Firmicutes;Clostridia;Oscillospirales;Ruminococcaceae;uncultured;uncultured_bacterium	Firmicutes	Clostridia	Oscillospirales	Ruminococcaceae	uncultured	uncultured_bacterium
0cc5ac758b5312cb4c60c198348583f2	509	Bacteria;Firmicutes;Clostridia;Oscillospirales;Oscillospiraceae;Colidextribacter;uncultured_bacterium	Firmicutes	Clostridia	Oscillospirales	Oscillospiraceae	Colidextribacter	uncultured_bacterium
0cd529f6b8d02eafbb1eabcbc5e80850	411	Bacteria;Firmicutes;Bacilli;Lactobacillales;Lactobacillaceae;Lactobacillus;uncultured_bacterium	Firmicutes	Bacilli	Lactobacillales	Lactobacillaceae	Lactobacillus	uncultured_bacterium
0cedf66e8668b9439f89025611862250	544	Bacteria;Firmicutes;Clostridia;Oscillospirales;Ruminococcaceae;uncultured;uncultured_bacterium	Firmicutes	Clostridia	Oscillospirales	Ruminococcaceae	uncultured	uncultured_bacterium
0cf13aff9bc1e0da217436198db37397	512	Bacteria;Firmicutes;Clostridia;Oscillospirales;Oscillospiraceae;NK4A214_group;uncultured_bacterium	Firmicutes	Clostridia	Oscillospirales	Oscillospiraceae	NK4A214_group	uncultured_bacterium
0cf9e62f12e49c9b4180a609605dab21	438	Bacteria;Firmicutes;Clostridia;Clostridia_vadinBB60_group;Clostridia_vadinBB60_group;Clostridia_vadinBB60_group;uncultured_bacterium	Firmicutes	Clostridia	Clostridia_vadinBB60_group	Clostridia_vadinBB60_group	Clostridia_vadinBB60_group	uncultured_bacterium
0cff5a6ede256998ddfb8b93495a1280	352	Bacteria;Actinobacteriota;Coriobacteriia;Coriobacteriales;Eggerthellaceae;__;__	Actinobacteriota	Coriobacteriia	Coriobacteriales	Eggerthellaceae
0d069087f182a9613f2c07061bc03d30	542	Bacteria;Firmicutes;Clostridia;Oscillospirales;Ruminococcaceae;__;__	Firmicutes	Clostridia	Oscillospirales	Ruminococcaceae
0d1f18a350fcd34b4cfdb9512651560d	500	Bacteria;Firmicutes;Clostridia;Lachnospirales;Lachnospiraceae;uncultured;uncultured_bacterium	Firmicutes	Clostridia	Lachnospirales	Lachnospiraceae	uncultured	uncultured_bacterium
0d23761a3963848b354d9a2d7ca2aa76	360	Bacteria;Bacteroidota;Bacteroidia;Bacteroidales;Muribaculaceae;Muribaculaceae;uncultured_bacterium	Bacteroidota	Bacteroidia	Bacteroidales	Muribaculaceae	Muribaculaceae	uncultured_bacterium
0d29bd397a2ff7a5e4fe9999622e7d98	493	Bacteria;Firmicutes;Clostridia;Lachnospirales;Lachnospiraceae;Roseburia;uncultured_bacterium	Firmicutes	Clostridia	Lachnospirales	Lachnospiraceae	Roseburia	uncultured_bacterium
0d3544bb98a45ef525b5af155345447f	482	Bacteria;Firmicutes;Clostridia;Lachnospirales;Lachnospiraceae;Lachnospiraceae_NK4A136_group;uncultured_bacterium	Firmicutes	Clostridia	Lachnospirales	Lachnospiraceae	Lachnospiraceae_NK4A136_group	uncultured_bacterium
0d36e673ac4c1284de509c1f8be4de95	509	Bacteria;Firmicutes;Clostridia;Oscillospirales;Oscillospiraceae;Colidextribacter;uncultured_bacterium	Firmicutes	Clostridia	Oscillospirales	Oscillospiraceae	Colidextribacter	uncultured_bacterium
0d3c395cb4e2e30bf0a5d9bb48048642	445	Bacteria;Firmicutes;Clostridia;Lachnospirales;Lachnospiraceae;[Eubacterium]_oxidoreducens_group;uncultured_bacterium	Firmicutes	Clostridia	Lachnospirales	Lachnospiraceae	[Eubacterium]_oxidoreducens_group	uncultured_bacterium
0d52b65cdad6f327c6f66c65e8b37f5c	482	Bacteria;Firmicutes;Clostridia;Lachnospirales;Lachnospiraceae;Lachnospiraceae_NK4A136_group;uncultured_bacterium	Firmicutes	Clostridia	Lachnospirales	Lachnospiraceae	Lachnospiraceae_NK4A136_group	uncultured_bacterium
0d57084b019b2c3da01069cbf0f195d0	500	Bacteria;Firmicutes;Clostridia;Lachnospirales;Lachnospiraceae;uncultured;uncultured_bacterium	Firmicutes	Clostridia	Lachnospirales	Lachnospiraceae	uncultured	uncultured_bacterium
0d5b761e54db63ef66a7d303d0392242	419	Bacteria;Firmicutes;Bacilli;RF39;RF39;RF39;uncultured_bacterium	Firmicutes	Bacilli	RF39	RF39	RF39	uncultured_bacterium
0d693d5292bcc17f45551e8944b47032	498	Bacteria;Firmicutes;Clostridia;Lachnospirales;Lachnospiraceae;__;__	Firmicutes	Clostridia	Lachnospirales	Lachnospiraceae
0d90b3adeb4844cb609af097a734d3b9	376	Bacteria;Desulfobacterota;Desulfovibrionia;Desulfovibrionales;Desulfovibrionaceae;Desulfovibrio;__	Desulfobacterota	Desulfovibrionia	Desulfovibrionales	Desulfovibrionaceae	Desulfovibrio
0da667f9d0a9c3db91976957a9be2eba	493	Bacteria;Firmicutes;Clostridia;Lachnospirales;Lachnospiraceae;Roseburia;uncultured_bacterium	Firmicutes	Clostridia	Lachnospirales	Lachnospiraceae	Roseburia	uncultured_bacterium
0da799b51bf22d2688824637fcec3ec9	360	Bacteria;Bacteroidota;Bacteroidia;Bacteroidales;Muribaculaceae;Muribaculaceae;uncultured_bacterium	Bacteroidota	Bacteroidia	Bacteroidales	Muribaculaceae	Muribaculaceae	uncultured_bacterium
0daa9af4a13534b6011fcd7e317627da	509	Bacteria;Firmicutes;Clostridia;Oscillospirales;Oscillospiraceae;Colidextribacter;uncultured_bacterium	Firmicutes	Clostridia	Oscillospirales	Oscillospiraceae	Colidextribacter	uncultured_bacterium
0dae455735233189512a29266b30b0d0	500	Bacteria;Firmicutes;Clostridia;Lachnospirales;Lachnospiraceae;uncultured;uncultured_bacterium	Firmicutes	Clostridia	Lachnospirales	Lachnospiraceae	uncultured	uncultured_bacterium
0daf7b175b5842a6c879ee7688979933	500	Bacteria;Firmicutes;Clostridia;Lachnospirales;Lachnospiraceae;uncultured;uncultured_bacterium	Firmicutes	Clostridia	Lachnospirales	Lachnospiraceae	uncultured	uncultured_bacterium
0db14cf6c7925bbee4de2a331c1cf3c0	438	Bacteria;Firmicutes;Clostridia;Clostridia_vadinBB60_group;Clostridia_vadinBB60_group;Clostridia_vadinBB60_group;uncultured_bacterium	Firmicutes	Clostridia	Clostridia_vadinBB60_group	Clostridia_vadinBB60_group	Clostridia_vadinBB60_group	uncultured_bacterium
0dbab493f4ba7f7ee26d1e662e27ac69	550	Bacteria;Firmicutes;Clostridia;Peptostreptococcales-Tissierellales;Anaerovoracaceae;[Eubacterium]_brachy_group;uncultured_bacterium	Firmicutes	Clostridia	Peptostreptococcales-Tissierellales	Anaerovoracaceae	[Eubacterium]_brachy_group	uncultured_bacterium
0dbfaf56bb9746beb019b0e5082d4496	493	Bacteria;Firmicutes;Clostridia;Lachnospirales;Lachnospiraceae;Roseburia;uncultured_bacterium	Firmicutes	Clostridia	Lachnospirales	Lachnospiraceae	Roseburia	uncultured_bacterium
0dc20ed77dc15e47e323d47d2d19136a	437	Bacteria;Firmicutes;Clostridia;Clostridia_vadinBB60_group;Clostridia_vadinBB60_group;Clostridia_vadinBB60_group;__	Firmicutes	Clostridia	Clostridia_vadinBB60_group	Clostridia_vadinBB60_group	Clostridia_vadinBB60_group
0deaad7ad841053e958570d3645b95b9	509	Bacteria;Firmicutes;Clostridia;Oscillospirales;Oscillospiraceae;Colidextribacter;uncultured_bacterium	Firmicutes	Clostridia	Oscillospirales	Oscillospiraceae	Colidextribacter	uncultured_bacterium
0deb0dcd8012fb9aee200753be9e1650	500	Bacteria;Firmicutes;Clostridia;Lachnospirales;Lachnospiraceae;uncultured;uncultured_bacterium	Firmicutes	Clostridia	Lachnospirales	Lachnospiraceae	uncultured	uncultured_bacterium
0df438034247e8e0968c290bcc1c8537	482	Bacteria;Firmicutes;Clostridia;Lachnospirales;Lachnospiraceae;Lachnospiraceae_NK4A136_group;uncultured_bacterium	Firmicutes	Clostridia	Lachnospirales	Lachnospiraceae	Lachnospiraceae_NK4A136_group	uncultured_bacterium
0df52256ebb11981772ce69f04d41e0b	500	Bacteria;Firmicutes;Clostridia;Lachnospirales;Lachnospiraceae;uncultured;uncultured_bacterium	Firmicutes	Clostridia	Lachnospirales	Lachnospiraceae	uncultured	uncultured_bacterium
0e09a8efd716944caba8efd1cd3a937f	566	Bacteria;Patescibacteria;Saccharimonadia;Saccharimonadales;Saccharimonadaceae;Candidatus_Saccharimonas;uncultured_bacterium	Patescibacteria	Saccharimonadia	Saccharimonadales	Saccharimonadaceae	Candidatus_Saccharimonas	uncultured_bacterium
0e20c48e57ce627b6d90d3b4f1cf0dee	498	Bacteria;Firmicutes;Clostridia;Lachnospirales;Lachnospiraceae;__;__	Firmicutes	Clostridia	Lachnospirales	Lachnospiraceae
0e2babdb742b28f2b6358a1c14d4aa3a	376	Bacteria;Desulfobacterota;Desulfovibrionia;Desulfovibrionales;Desulfovibrionaceae;Desulfovibrio;__	Desulfobacterota	Desulfovibrionia	Desulfovibrionales	Desulfovibrionaceae	Desulfovibrio
0e3576c13880f99663bbfa71217e3b4a	523	Bacteria;Firmicutes;Clostridia;Oscillospirales;Oscillospiraceae;uncultured;uncultured_bacterium	Firmicutes	Clostridia	Oscillospirales	Oscillospiraceae	uncultured	uncultured_bacterium
0e3a8a7cf383225d6939d875e60d037f	523	Bacteria;Firmicutes;Clostridia;Oscillospirales;Oscillospiraceae;uncultured;uncultured_bacterium	Firmicutes	Clostridia	Oscillospirales	Oscillospiraceae	uncultured	uncultured_bacterium
0e3c16a22849a3c35f26f6b983672f34	542	Bacteria;Firmicutes;Clostridia;Oscillospirales;Ruminococcaceae;__;__	Firmicutes	Clostridia	Oscillospirales	Ruminococcaceae
0e4d73824ff8fd066ef6e9153d26ced8	529	Bacteria;Firmicutes;Clostridia;Oscillospirales;Ruminococcaceae;Anaerotruncus;uncultured_bacterium	Firmicutes	Clostridia	Oscillospirales	Ruminococcaceae	Anaerotruncus	uncultured_bacterium
0e554729884ff0e2b4d3a1af9f9ae083	360	Bacteria;Bacteroidota;Bacteroidia;Bacteroidales;Muribaculaceae;Muribaculaceae;uncultured_bacterium	Bacteroidota	Bacteroidia	Bacteroidales	Muribaculaceae	Muribaculaceae	uncultured_bacterium
0e57772f032534a59ae27b8c7bb36a45	360	Bacteria;Bacteroidota;Bacteroidia;Bacteroidales;Muribaculaceae;Muribaculaceae;uncultured_bacterium	Bacteroidota	Bacteroidia	Bacteroidales	Muribaculaceae	Muribaculaceae	uncultured_bacterium
0e579d48d377703ea75f602eb17fd735	498	Bacteria;Firmicutes;Clostridia;Lachnospirales;Lachnospiraceae;__;__	Firmicutes	Clostridia	Lachnospirales	Lachnospiraceae
0e60788c2dc779b3e7231c0e73f072f8	362	Bacteria;Bacteroidota;Bacteroidia;Bacteroidales;Rikenellaceae;Alistipes;uncultured_bacterium	Bacteroidota	Bacteroidia	Bacteroidales	Rikenellaceae	Alistipes	uncultured_bacterium
0e677a420474e83dfdfb8c4d36e32bf9	544	Bacteria;Firmicutes;Clostridia;Oscillospirales;Ruminococcaceae;uncultured;uncultured_bacterium	Firmicutes	Clostridia	Oscillospirales	Ruminococcaceae	uncultured	uncultured_bacterium
0e6b38bbf719bb9ca0babf33060580a9	523	Bacteria;Firmicutes;Clostridia;Oscillospirales;Oscillospiraceae;uncultured;uncultured_bacterium	Firmicutes	Clostridia	Oscillospirales	Oscillospiraceae	uncultured	uncultured_bacterium
0e7e84492b10e6167a524050cafba4fe	498	Bacteria;Firmicutes;Clostridia;Lachnospirales;Lachnospiraceae;__;__	Firmicutes	Clostridia	Lachnospirales	Lachnospiraceae
0e8356ddb2fb251dc41fb41994294199	487	Bacteria;Firmicutes;Clostridia;Lachnospirales;Lachnospiraceae;Lachnospiraceae_UCG-006;uncultured_bacterium	Firmicutes	Clostridia	Lachnospirales	Lachnospiraceae	Lachnospiraceae_UCG-006	uncultured_bacterium
0e95daa23168758265d9d0c003d7a5f1	482	Bacteria;Firmicutes;Clostridia;Lachnospirales;Lachnospiraceae;Lachnospiraceae_NK4A136_group;uncultured_bacterium	Firmicutes	Clostridia	Lachnospirales	Lachnospiraceae	Lachnospiraceae_NK4A136_group	uncultured_bacterium
0e976f8c0364d34dd902b64e338f8599	473	Bacteria;Firmicutes;Clostridia;Lachnospirales;Lachnospiraceae;Lachnoclostridium;uncultured_bacterium	Firmicutes	Clostridia	Lachnospirales	Lachnospiraceae	Lachnoclostridium	uncultured_bacterium
0e9865cd38305209446320316a6a7031	360	Bacteria;Bacteroidota;Bacteroidia;Bacteroidales;Muribaculaceae;Muribaculaceae;uncultured_bacterium	Bacteroidota	Bacteroidia	Bacteroidales	Muribaculaceae	Muribaculaceae	uncultured_bacterium
0e9bd47a9ed89af06a7f84796c65d2fe	482	Bacteria;Firmicutes;Clostridia;Lachnospirales;Lachnospiraceae;Lachnospiraceae_NK4A136_group;uncultured_bacterium	Firmicutes	Clostridia	Lachnospirales	Lachnospiraceae	Lachnospiraceae_NK4A136_group	uncultured_bacterium
0ea466595488340ab9d2e81eb4c11439	544	Bacteria;Firmicutes;Clostridia;Oscillospirales;Ruminococcaceae;uncultured;uncultured_bacterium	Firmicutes	Clostridia	Oscillospirales	Ruminococcaceae	uncultured	uncultured_bacterium
0eb341946cbeb4657059e231f61844f0	544	Bacteria;Firmicutes;Clostridia;Oscillospirales;Ruminococcaceae;uncultured;uncultured_bacterium	Firmicutes	Clostridia	Oscillospirales	Ruminococcaceae	uncultured	uncultured_bacterium
0ebaa424276a812a338f6141f1628077	499	Bacteria;Firmicutes;Clostridia;Lachnospirales;Lachnospiraceae;uncultured;__	Firmicutes	Clostridia	Lachnospirales	Lachnospiraceae	uncultured
0ebc0c01440e55e7ab23b0cc3ddc2499	360	Bacteria;Bacteroidota;Bacteroidia;Bacteroidales;Muribaculaceae;Muribaculaceae;uncultured_bacterium	Bacteroidota	Bacteroidia	Bacteroidales	Muribaculaceae	Muribaculaceae	uncultured_bacterium
0ec96d3d012359bf10f22ce1c9e6cf57	486	Bacteria;Firmicutes;Clostridia;Lachnospirales;Lachnospiraceae;Lachnospiraceae_UCG-001;uncultured_bacterium	Firmicutes	Clostridia	Lachnospirales	Lachnospiraceae	Lachnospiraceae_UCG-001	uncultured_bacterium
0ed45cf47444c1dbae1604bf78b41fdc	349	Bacteria;Actinobacteriota;Coriobacteriia;Coriobacteriales;Eggerthellaceae;Adlercreutzia;__	Actinobacteriota	Coriobacteriia	Coriobacteriales	Eggerthellaceae	Adlercreutzia
0f03f895eab148b39fb02e3fd29d6dda	487	Bacteria;Firmicutes;Clostridia;Lachnospirales;Lachnospiraceae;Lachnospiraceae_UCG-006;uncultured_bacterium	Firmicutes	Clostridia	Lachnospirales	Lachnospiraceae	Lachnospiraceae_UCG-006	uncultured_bacterium
0f04b5a5867084e67e183a0824174ff5	481	Bacteria;Firmicutes;Clostridia;Lachnospirales;Lachnospiraceae;Lachnospiraceae_NK4A136_group;__	Firmicutes	Clostridia	Lachnospirales	Lachnospiraceae	Lachnospiraceae_NK4A136_group
0f14a83ca0c0570c6e6cf4674f3495a8	438	Bacteria;Firmicutes;Clostridia;Clostridia_vadinBB60_group;Clostridia_vadinBB60_group;Clostridia_vadinBB60_group;uncultured_bacterium	Firmicutes	Clostridia	Clostridia_vadinBB60_group	Clostridia_vadinBB60_group	Clostridia_vadinBB60_group	uncultured_bacterium
0f1597df013d6330d23189241efbe1fa	434	Bacteria;Firmicutes;Clostridia;Clostridia_UCG-014;Clostridia_UCG-014;Clostridia_UCG-014;uncultured_bacterium	Firmicutes	Clostridia	Clostridia_UCG-014	Clostridia_UCG-014	Clostridia_UCG-014	uncultured_bacterium
0f2a5acc53e55f2c9f0c7409421dc5a0	529	Bacteria;Firmicutes;Clostridia;Oscillospirales;Ruminococcaceae;Anaerotruncus;uncultured_bacterium	Firmicutes	Clostridia	Oscillospirales	Ruminococcaceae	Anaerotruncus	uncultured_bacterium
0f402141a71d2f3ecf29aa50450df57c	544	Bacteria;Firmicutes;Clostridia;Oscillospirales;Ruminococcaceae;uncultured;uncultured_bacterium	Firmicutes	Clostridia	Oscillospirales	Ruminococcaceae	uncultured	uncultured_bacterium
0f5b069015d8ee4169cac8a12193c5c2	523	Bacteria;Firmicutes;Clostridia;Oscillospirales;Oscillospiraceae;uncultured;uncultured_bacterium	Firmicutes	Clostridia	Oscillospirales	Oscillospiraceae	uncultured	uncultured_bacterium
0f5d81c1cd431639f28f67cd5de5b7d8	498	Bacteria;Firmicutes;Clostridia;Lachnospirales;Lachnospiraceae;__;__	Firmicutes	Clostridia	Lachnospirales	Lachnospiraceae
0f728325a45113cd1637aaa3d9dc8808	438	Bacteria;Firmicutes;Clostridia;Clostridia_vadinBB60_group;Clostridia_vadinBB60_group;Clostridia_vadinBB60_group;uncultured_bacterium	Firmicutes	Clostridia	Clostridia_vadinBB60_group	Clostridia_vadinBB60_group	Clostridia_vadinBB60_group	uncultured_bacterium
0f731e1a20b1b856d88d37423556450b	469	Bacteria;Firmicutes;Clostridia;Lachnospirales;Lachnospiraceae;Eisenbergiella;uncultured_bacterium	Firmicutes	Clostridia	Lachnospirales	Lachnospiraceae	Eisenbergiella	uncultured_bacterium
0f89df55d0417845cb79751dec0051ed	500	Bacteria;Firmicutes;Clostridia;Lachnospirales;Lachnospiraceae;uncultured;uncultured_bacterium	Firmicutes	Clostridia	Lachnospirales	Lachnospiraceae	uncultured	uncultured_bacterium
0f94d5594dec0e0879f3da115d859f2c	502	Bacteria;Firmicutes;Clostridia;Monoglobales;Monoglobaceae;Monoglobus;uncultured_bacterium	Firmicutes	Clostridia	Monoglobales	Monoglobaceae	Monoglobus	uncultured_bacterium
0fa54a24c5b826f2f13140ce7c73f5d5	500	Bacteria;Firmicutes;Clostridia;Lachnospirales;Lachnospiraceae;uncultured;uncultured_bacterium	Firmicutes	Clostridia	Lachnospirales	Lachnospiraceae	uncultured	uncultured_bacterium
0fb47e3cad8199f46d2f181c6312a010	502	Bacteria;Firmicutes;Clostridia;Monoglobales;Monoglobaceae;Monoglobus;uncultured_bacterium	Firmicutes	Clostridia	Monoglobales	Monoglobaceae	Monoglobus	uncultured_bacterium
0fd00cf6a4a156b7eeb269a44e6051bb	493	Bacteria;Firmicutes;Clostridia;Lachnospirales;Lachnospiraceae;Roseburia;uncultured_bacterium	Firmicutes	Clostridia	Lachnospirales	Lachnospiraceae	Roseburia	uncultured_bacterium
0fd05ae2f949818da5c87c5762c1c031	523	Bacteria;Firmicutes;Clostridia;Oscillospirales;Oscillospiraceae;uncultured;uncultured_bacterium	Firmicutes	Clostridia	Oscillospirales	Oscillospiraceae	uncultured	uncultured_bacterium
0fd826c16fe2bf647f1bc4f92f92c10d	360	Bacteria;Bacteroidota;Bacteroidia;Bacteroidales;Muribaculaceae;Muribaculaceae;uncultured_bacterium	Bacteroidota	Bacteroidia	Bacteroidales	Muribaculaceae	Muribaculaceae	uncultured_bacterium
0fe05bd071b83a36787cfc56655d1b6d	360	Bacteria;Bacteroidota;Bacteroidia;Bacteroidales;Muribaculaceae;Muribaculaceae;uncultured_bacterium	Bacteroidota	Bacteroidia	Bacteroidales	Muribaculaceae	Muribaculaceae	uncultured_bacterium
0fedda170deca205fb302f4f7a1b10ee	482	Bacteria;Firmicutes;Clostridia;Lachnospirales;Lachnospiraceae;Lachnospiraceae_NK4A136_group;uncultured_bacterium	Firmicutes	Clostridia	Lachnospirales	Lachnospiraceae	Lachnospiraceae_NK4A136_group	uncultured_bacterium
0ff400ece776bad8dbed471b5f678de0	358	Bacteria;Bacteroidota;Bacteroidia;Bacteroidales;Marinifilaceae;Odoribacter;__	Bacteroidota	Bacteroidia	Bacteroidales	Marinifilaceae	Odoribacter
100300f07a2cfce186e167fc9035011a	498	Bacteria;Firmicutes;Clostridia;Lachnospirales;Lachnospiraceae;__;__	Firmicutes	Clostridia	Lachnospirales	Lachnospiraceae
1003ffb932f2961b8412264b41503060	440	Bacteria;Firmicutes;Clostridia;Clostridiales;Clostridiaceae;Candidatus_Arthromitus;Candidatus_Arthromitus	Firmicutes	Clostridia	Clostridiales	Clostridiaceae	Candidatus_Arthromitus	Candidatus_Arthromitus
100c23ba7636496b08120dada614ebc1	360	Bacteria;Bacteroidota;Bacteroidia;Bacteroidales;Muribaculaceae;Muribaculaceae;uncultured_bacterium	Bacteroidota	Bacteroidia	Bacteroidales	Muribaculaceae	Muribaculaceae	uncultured_bacterium
100ec6aa3fffcdbeb82b868301347b51	500	Bacteria;Firmicutes;Clostridia;Lachnospirales;Lachnospiraceae;uncultured;uncultured_bacterium	Firmicutes	Clostridia	Lachnospirales	Lachnospiraceae	uncultured	uncultured_bacterium
10158a29eb947979a85772e6d408b24d	542	Bacteria;Firmicutes;Clostridia;Oscillospirales;Ruminococcaceae;__;__	Firmicutes	Clostridia	Oscillospirales	Ruminococcaceae
1027881f75716b54c782fffd140e4a91	410	Bacteria;Firmicutes;Bacilli;Lactobacillales;Lactobacillaceae;Lactobacillus;__	Firmicutes	Bacilli	Lactobacillales	Lactobacillaceae	Lactobacillus
10278ea10340c256fb4769c17ed97a8d	523	Bacteria;Firmicutes;Clostridia;Oscillospirales;Oscillospiraceae;uncultured;uncultured_bacterium	Firmicutes	Clostridia	Oscillospirales	Oscillospiraceae	uncultured	uncultured_bacterium
104fb68b2b0b7e70fc2c612d2b648a89	523	Bacteria;Firmicutes;Clostridia;Oscillospirales;Oscillospiraceae;uncultured;uncultured_bacterium	Firmicutes	Clostridia	Oscillospirales	Oscillospiraceae	uncultured	uncultured_bacterium
1057b8d16dd176a7e6a9e4cb40d17540	578	Bacteria;Proteobacteria;Gammaproteobacteria;Burkholderiales;Oxalobacteraceae;Oxalobacter;__	Proteobacteria	Gammaproteobacteria	Burkholderiales	Oxalobacteraceae	Oxalobacter
1068c27108e3be5ccbb15d06c2f2d9ee	544	Bacteria;Firmicutes;Clostridia;Oscillospirales;Ruminococcaceae;uncultured;uncultured_bacterium	Firmicutes	Clostridia	Oscillospirales	Ruminococcaceae	uncultured	uncultured_bacterium
106957304812e3108da51c541113e398	486	Bacteria;Firmicutes;Clostridia;Lachnospirales;Lachnospiraceae;Lachnospiraceae_UCG-001;uncultured_bacterium	Firmicutes	Clostridia	Lachnospirales	Lachnospiraceae	Lachnospiraceae_UCG-001	uncultured_bacterium
1074c4b4335f5a701910ea0284d6a873	523	Bacteria;Firmicutes;Clostridia;Oscillospirales;Oscillospiraceae;uncultured;uncultured_bacterium	Firmicutes	Clostridia	Oscillospirales	Oscillospiraceae	uncultured	uncultured_bacterium
107cccb991ebf16e2065bdf846ae1617	500	Bacteria;Firmicutes;Clostridia;Lachnospirales;Lachnospiraceae;uncultured;uncultured_bacterium	Firmicutes	Clostridia	Lachnospirales	Lachnospiraceae	uncultured	uncultured_bacterium
10a247e8ed8fbe1971f955760672e632	472	Bacteria;Firmicutes;Clostridia;Lachnospirales;Lachnospiraceae;Lachnoclostridium;__	Firmicutes	Clostridia	Lachnospirales	Lachnospiraceae	Lachnoclostridium
10a4361cb5b12cecac86011c7222c98f	523	Bacteria;Firmicutes;Clostridia;Oscillospirales;Oscillospiraceae;uncultured;uncultured_bacterium	Firmicutes	Clostridia	Oscillospirales	Oscillospiraceae	uncultured	uncultured_bacterium
10ac415716fc9b9e2f15536e21ea942f	500	Bacteria;Firmicutes;Clostridia;Lachnospirales;Lachnospiraceae;uncultured;uncultured_bacterium	Firmicutes	Clostridia	Lachnospirales	Lachnospiraceae	uncultured	uncultured_bacterium
10b8e5889c387dc549721bcdd777eb6c	482	Bacteria;Firmicutes;Clostridia;Lachnospirales;Lachnospiraceae;Lachnospiraceae_NK4A136_group;uncultured_bacterium	Firmicutes	Clostridia	Lachnospirales	Lachnospiraceae	Lachnospiraceae_NK4A136_group	uncultured_bacterium
10be8ef50070ddf11d6258d64d938e81	482	Bacteria;Firmicutes;Clostridia;Lachnospirales;Lachnospiraceae;Lachnospiraceae_NK4A136_group;uncultured_bacterium	Firmicutes	Clostridia	Lachnospirales	Lachnospiraceae	Lachnospiraceae_NK4A136_group	uncultured_bacterium
10c0ff48f3fce32f2c705a29f2796942	498	Bacteria;Firmicutes;Clostridia;Lachnospirales;Lachnospiraceae;__;__	Firmicutes	Clostridia	Lachnospirales	Lachnospiraceae
10d103768ebc79c8d45106a20ed4b7db	434	Bacteria;Firmicutes;Clostridia;Clostridia_UCG-014;Clostridia_UCG-014;Clostridia_UCG-014;uncultured_bacterium	Firmicutes	Clostridia	Clostridia_UCG-014	Clostridia_UCG-014	Clostridia_UCG-014	uncultured_bacterium
10d7340a1dbc575e03f7350e14fdebf3	480	Bacteria;Firmicutes;Clostridia;Lachnospirales;Lachnospiraceae;Lachnospiraceae_NK3A20_group;uncultured_bacterium	Firmicutes	Clostridia	Lachnospirales	Lachnospiraceae	Lachnospiraceae_NK3A20_group	uncultured_bacterium
10f2fa3448f379cde89471d4147d89df	496	Bacteria;Firmicutes;Clostridia;Lachnospirales;Lachnospiraceae;Tyzzerella;uncultured_bacterium	Firmicutes	Clostridia	Lachnospirales	Lachnospiraceae	Tyzzerella	uncultured_bacterium
10f46f346ebc46909e241f5dc39734e8	500	Bacteria;Firmicutes;Clostridia;Lachnospirales;Lachnospiraceae;uncultured;uncultured_bacterium	Firmicutes	Clostridia	Lachnospirales	Lachnospiraceae	uncultured	uncultured_bacterium
10fa736154484caf592844e431c0ace3	360	Bacteria;Bacteroidota;Bacteroidia;Bacteroidales;Muribaculaceae;Muribaculaceae;uncultured_bacterium	Bacteroidota	Bacteroidia	Bacteroidales	Muribaculaceae	Muribaculaceae	uncultured_bacterium
10fffd18e6ae8fa584683cdfbbd5d17e	482	Bacteria;Firmicutes;Clostridia;Lachnospirales;Lachnospiraceae;Lachnospiraceae_NK4A136_group;uncultured_bacterium	Firmicutes	Clostridia	Lachnospirales	Lachnospiraceae	Lachnospiraceae_NK4A136_group	uncultured_bacterium
1114e2eee5a7297568b1eb83f6a5ca30	500	Bacteria;Firmicutes;Clostridia;Lachnospirales;Lachnospiraceae;uncultured;uncultured_bacterium	Firmicutes	Clostridia	Lachnospirales	Lachnospiraceae	uncultured	uncultured_bacterium
112190c724167ec5441dfb63c436c0f7	547	Bacteria;Firmicutes;Clostridia;Peptococcales;Peptococcaceae;Peptococcus;__	Firmicutes	Clostridia	Peptococcales	Peptococcaceae	Peptococcus
112dd7f9cd51018f5d0b0fc8db6d3037	496	Bacteria;Firmicutes;Clostridia;Lachnospirales;Lachnospiraceae;Tyzzerella;uncultured_bacterium	Firmicutes	Clostridia	Lachnospirales	Lachnospiraceae	Tyzzerella	uncultured_bacterium
11316613ef0e889d1d8b17d8d2651908	500	Bacteria;Firmicutes;Clostridia;Lachnospirales;Lachnospiraceae;uncultured;uncultured_bacterium	Firmicutes	Clostridia	Lachnospirales	Lachnospiraceae	uncultured	uncultured_bacterium
1143888b04478ed01b18a52722fa8421	556	Bacteria;Firmicutes;Clostridia;Peptostreptococcales-Tissierellales;Anaerovoracaceae;Family_XIII_UCG-001;uncultured_bacterium	Firmicutes	Clostridia	Peptostreptococcales-Tissierellales	Anaerovoracaceae	Family_XIII_UCG-001	uncultured_bacterium
11445b5bfb45e98c1b9d31a783c45fc6	523	Bacteria;Firmicutes;Clostridia;Oscillospirales;Oscillospiraceae;uncultured;uncultured_bacterium	Firmicutes	Clostridia	Oscillospirales	Oscillospiraceae	uncultured	uncultured_bacterium
11463c3f1d3d218fd8541a409cad9a4e	493	Bacteria;Firmicutes;Clostridia;Lachnospirales;Lachnospiraceae;Roseburia;uncultured_bacterium	Firmicutes	Clostridia	Lachnospirales	Lachnospiraceae	Roseburia	uncultured_bacterium
11501aca998b8414ced68402be85aee4	498	Bacteria;Firmicutes;Clostridia;Lachnospirales;Lachnospiraceae;__;__	Firmicutes	Clostridia	Lachnospirales	Lachnospiraceae
116f17eecfb8b6c4e6c7985c8bccdd8c	482	Bacteria;Firmicutes;Clostridia;Lachnospirales;Lachnospiraceae;Lachnospiraceae_NK4A136_group;uncultured_bacterium	Firmicutes	Clostridia	Lachnospirales	Lachnospiraceae	Lachnospiraceae_NK4A136_group	uncultured_bacterium
1174015b3c71e3a8cf73f3d084a8d806	541	Bacteria;Firmicutes;Clostridia;Oscillospirales;Ruminococcaceae;UBA1819;uncultured_organism	Firmicutes	Clostridia	Oscillospirales	Ruminococcaceae	UBA1819	uncultured_organism
1192fc929428925e306f61d89dc08862	500	Bacteria;Firmicutes;Clostridia;Lachnospirales;Lachnospiraceae;uncultured;uncultured_bacterium	Firmicutes	Clostridia	Lachnospirales	Lachnospiraceae	uncultured	uncultured_bacterium
119fe85daddfc2fea06676e1f905fdc0	500	Bacteria;Firmicutes;Clostridia;Lachnospirales;Lachnospiraceae;uncultured;uncultured_bacterium	Firmicutes	Clostridia	Lachnospirales	Lachnospiraceae	uncultured	uncultured_bacterium
11ab37b279683b690efdae7e2132db40	500	Bacteria;Firmicutes;Clostridia;Lachnospirales;Lachnospiraceae;uncultured;uncultured_bacterium	Firmicutes	Clostridia	Lachnospirales	Lachnospiraceae	uncultured	uncultured_bacterium
11ac36506479e82b7121213e3a5b679a	374	Bacteria;Desulfobacterota;Desulfovibrionia;Desulfovibrionales;Desulfovibrionaceae;Bilophila;uncultured_bacterium	Desulfobacterota	Desulfovibrionia	Desulfovibrionales	Desulfovibrionaceae	Bilophila	uncultured_bacterium
11c0270b94ccbbc8a03e81ae5aeb57ad	482	Bacteria;Firmicutes;Clostridia;Lachnospirales;Lachnospiraceae;Lachnospiraceae_NK4A136_group;uncultured_bacterium	Firmicutes	Clostridia	Lachnospirales	Lachnospiraceae	Lachnospiraceae_NK4A136_group	uncultured_bacterium
11e168c77a9210bd9d77154f3dbe4b3e	376	Bacteria;Desulfobacterota;Desulfovibrionia;Desulfovibrionales;Desulfovibrionaceae;Desulfovibrio;__	Desulfobacterota	Desulfovibrionia	Desulfovibrionales	Desulfovibrionaceae	Desulfovibrio
11edaeb61751a4ae3a30724db4664f99	500	Bacteria;Firmicutes;Clostridia;Lachnospirales;Lachnospiraceae;uncultured;uncultured_bacterium	Firmicutes	Clostridia	Lachnospirales	Lachnospiraceae	uncultured	uncultured_bacterium
11faf45ea581adaad398bb8b08a3e6f9	572	Bacteria;Proteobacteria;Alphaproteobacteria;Rhodospirillales;uncultured;uncultured;uncultured_bacterium	Proteobacteria	Alphaproteobacteria	Rhodospirillales	uncultured	uncultured	uncultured_bacterium
122b36b598c4eaf6ae235ba03b839160	351	Bacteria;Actinobacteriota;Coriobacteriia;Coriobacteriales;Eggerthellaceae;Enterorhabdus;uncultured_bacterium	Actinobacteriota	Coriobacteriia	Coriobacteriales	Eggerthellaceae	Enterorhabdus	uncultured_bacterium
122c7532941f4971cdb195962e518fb2	509	Bacteria;Firmicutes;Clostridia;Oscillospirales;Oscillospiraceae;Colidextribacter;uncultured_bacterium	Firmicutes	Clostridia	Oscillospirales	Oscillospiraceae	Colidextribacter	uncultured_bacterium
122f16943fa8eacde9dd17f8527b2319	438	Bacteria;Firmicutes;Clostridia;Clostridia_vadinBB60_group;Clostridia_vadinBB60_group;Clostridia_vadinBB60_group;uncultured_bacterium	Firmicutes	Clostridia	Clostridia_vadinBB60_group	Clostridia_vadinBB60_group	Clostridia_vadinBB60_group	uncultured_bacterium
1234e2d4e78128be7d591454bd428f44	547	Bacteria;Firmicutes;Clostridia;Peptococcales;Peptococcaceae;Peptococcus;__	Firmicutes	Clostridia	Peptococcales	Peptococcaceae	Peptococcus
1237c48270c80f0a2daa6fed65b5041c	376	Bacteria;Desulfobacterota;Desulfovibrionia;Desulfovibrionales;Desulfovibrionaceae;Desulfovibrio;__	Desulfobacterota	Desulfovibrionia	Desulfovibrionales	Desulfovibrionaceae	Desulfovibrio
124f3800797ee80cc91cd41a766c2840	360	Bacteria;Bacteroidota;Bacteroidia;Bacteroidales;Muribaculaceae;Muribaculaceae;uncultured_bacterium	Bacteroidota	Bacteroidia	Bacteroidales	Muribaculaceae	Muribaculaceae	uncultured_bacterium
12582606c83ff572dabe2a25e56312c1	438	Bacteria;Firmicutes;Clostridia;Clostridia_vadinBB60_group;Clostridia_vadinBB60_group;Clostridia_vadinBB60_group;uncultured_bacterium	Firmicutes	Clostridia	Clostridia_vadinBB60_group	Clostridia_vadinBB60_group	Clostridia_vadinBB60_group	uncultured_bacterium
125bdae8a26aaf070d525f8d7c5408b1	463	Bacteria;Firmicutes;Clostridia;Lachnospirales;Lachnospiraceae;Blautia;uncultured_bacterium	Firmicutes	Clostridia	Lachnospirales	Lachnospiraceae	Blautia	uncultured_bacterium
1260bfe0b24a014139e78e8f139d990c	504	Bacteria;Firmicutes;Clostridia;Oscillospirales;[Eubacterium]_coprostanoligenes_group;[Eubacterium]_coprostanoligenes_group;uncultured_bacterium	Firmicutes	Clostridia	Oscillospirales	[Eubacterium]_coprostanoligenes_group	[Eubacterium]_coprostanoligenes_group	uncultured_bacterium
12610d9ca13abb5c66f66e35a28e9484	544	Bacteria;Firmicutes;Clostridia;Oscillospirales;Ruminococcaceae;uncultured;uncultured_bacterium	Firmicutes	Clostridia	Oscillospirales	Ruminococcaceae	uncultured	uncultured_bacterium
12648455431117f4749172099e91c80c	438	Bacteria;Firmicutes;Clostridia;Clostridia_vadinBB60_group;Clostridia_vadinBB60_group;Clostridia_vadinBB60_group;uncultured_bacterium	Firmicutes	Clostridia	Clostridia_vadinBB60_group	Clostridia_vadinBB60_group	Clostridia_vadinBB60_group	uncultured_bacterium
126be591196c75e9609a3424aaa505c2	482	Bacteria;Firmicutes;Clostridia;Lachnospirales;Lachnospiraceae;Lachnospiraceae_NK4A136_group;uncultured_bacterium	Firmicutes	Clostridia	Lachnospirales	Lachnospiraceae	Lachnospiraceae_NK4A136_group	uncultured_bacterium
126f8784755c0c3879a57760f1d89fbf	482	Bacteria;Firmicutes;Clostridia;Lachnospirales;Lachnospiraceae;Lachnospiraceae_NK4A136_group;uncultured_bacterium	Firmicutes	Clostridia	Lachnospirales	Lachnospiraceae	Lachnospiraceae_NK4A136_group	uncultured_bacterium
127b040d34ba64d9d8ff98eb0d98e0bf	500	Bacteria;Firmicutes;Clostridia;Lachnospirales;Lachnospiraceae;uncultured;uncultured_bacterium	Firmicutes	Clostridia	Lachnospirales	Lachnospiraceae	uncultured	uncultured_bacterium
1296ce37a6c99ad7a7441a834ef866c4	544	Bacteria;Firmicutes;Clostridia;Oscillospirales;Ruminococcaceae;uncultured;uncultured_bacterium	Firmicutes	Clostridia	Oscillospirales	Ruminococcaceae	uncultured	uncultured_bacterium
12ac9ce86479ee67bab45353fc7e8202	523	Bacteria;Firmicutes;Clostridia;Oscillospirales;Oscillospiraceae;uncultured;uncultured_bacterium	Firmicutes	Clostridia	Oscillospirales	Oscillospiraceae	uncultured	uncultured_bacterium
12ade41cdaf62d08404941860e329742	360	Bacteria;Bacteroidota;Bacteroidia;Bacteroidales;Muribaculaceae;Muribaculaceae;uncultured_bacterium	Bacteroidota	Bacteroidia	Bacteroidales	Muribaculaceae	Muribaculaceae	uncultured_bacterium
12be661f91980b8e9610c5fe2f170d6a	454	Bacteria;Firmicutes;Clostridia;Lachnospirales;Lachnospiraceae;Acetatifactor;uncultured_bacterium	Firmicutes	Clostridia	Lachnospirales	Lachnospiraceae	Acetatifactor	uncultured_bacterium
12c6f2878f8d7da2584951261bfd77e8	500	Bacteria;Firmicutes;Clostridia;Lachnospirales;Lachnospiraceae;uncultured;uncultured_bacterium	Firmicutes	Clostridia	Lachnospirales	Lachnospiraceae	uncultured	uncultured_bacterium
12de59cd2895cb8d763d6e924d0709b9	360	Bacteria;Bacteroidota;Bacteroidia;Bacteroidales;Muribaculaceae;Muribaculaceae;uncultured_bacterium	Bacteroidota	Bacteroidia	Bacteroidales	Muribaculaceae	Muribaculaceae	uncultured_bacterium
12ed5b1e7cfe5f6f7bf739ca9d2fdaaf	523	Bacteria;Firmicutes;Clostridia;Oscillospirales;Oscillospiraceae;uncultured;uncultured_bacterium	Firmicutes	Clostridia	Oscillospirales	Oscillospiraceae	uncultured	uncultured_bacterium
12f10977647e28ae7d472b2306c62bdd	438	Bacteria;Firmicutes;Clostridia;Clostridia_vadinBB60_group;Clostridia_vadinBB60_group;Clostridia_vadinBB60_group;uncultured_bacterium	Firmicutes	Clostridia	Clostridia_vadinBB60_group	Clostridia_vadinBB60_group	Clostridia_vadinBB60_group	uncultured_bacterium
12fcafd4f3d6a6e47af5151df3d23abd	507	Bacteria;Firmicutes;Clostridia;Oscillospirales;Butyricicoccaceae;UCG-009;uncultured_bacterium	Firmicutes	Clostridia	Oscillospirales	Butyricicoccaceae	UCG-009	uncultured_bacterium
130a111f45572cb515051094893792e4	482	Bacteria;Firmicutes;Clostridia;Lachnospirales;Lachnospiraceae;Lachnospiraceae_NK4A136_group;uncultured_bacterium	Firmicutes	Clostridia	Lachnospirales	Lachnospiraceae	Lachnospiraceae_NK4A136_group	uncultured_bacterium
13149bbb093a03083af41998ff0a742c	518	Bacteria;Firmicutes;Clostridia;Oscillospirales;Oscillospiraceae;UCG-005;uncultured_bacterium	Firmicutes	Clostridia	Oscillospirales	Oscillospiraceae	UCG-005	uncultured_bacterium
13170789faf76819bb3e53e66ba6cf7c	523	Bacteria;Firmicutes;Clostridia;Oscillospirales;Oscillospiraceae;uncultured;uncultured_bacterium	Firmicutes	Clostridia	Oscillospirales	Oscillospiraceae	uncultured	uncultured_bacterium
13211404fc342d1a08e7bea9e528105a	397	Bacteria;Firmicutes;Bacilli;Erysipelotrichales;Erysipelotrichaceae;Ileibacterium;__	Firmicutes	Bacilli	Erysipelotrichales	Erysipelotrichaceae	Ileibacterium
132244510644b62f98df94f97443de61	500	Bacteria;Firmicutes;Clostridia;Lachnospirales;Lachnospiraceae;uncultured;uncultured_bacterium	Firmicutes	Clostridia	Lachnospirales	Lachnospiraceae	uncultured	uncultured_bacterium
13286a9ca365bdf8ab7730b907f6ad85	360	Bacteria;Bacteroidota;Bacteroidia;Bacteroidales;Muribaculaceae;Muribaculaceae;uncultured_bacterium	Bacteroidota	Bacteroidia	Bacteroidales	Muribaculaceae	Muribaculaceae	uncultured_bacterium
133e1df1c27501f9892d04b56ec4d0e1	500	Bacteria;Firmicutes;Clostridia;Lachnospirales;Lachnospiraceae;uncultured;uncultured_bacterium	Firmicutes	Clostridia	Lachnospirales	Lachnospiraceae	uncultured	uncultured_bacterium
134cda263d7f91984db1f2db3c921ce7	588	Bacteria;Proteobacteria;Gammaproteobacteria;Pasteurellales;Pasteurellaceae;__;__	Proteobacteria	Gammaproteobacteria	Pasteurellales	Pasteurellaceae
134e35dfdb1e538f5cea4f18da7e5e2b	487	Bacteria;Firmicutes;Clostridia;Lachnospirales;Lachnospiraceae;Lachnospiraceae_UCG-006;uncultured_bacterium	Firmicutes	Clostridia	Lachnospirales	Lachnospiraceae	Lachnospiraceae_UCG-006	uncultured_bacterium
136ceecba0e534869c64a2c1357c9f4c	482	Bacteria;Firmicutes;Clostridia;Lachnospirales;Lachnospiraceae;Lachnospiraceae_NK4A136_group;uncultured_bacterium	Firmicutes	Clostridia	Lachnospirales	Lachnospiraceae	Lachnospiraceae_NK4A136_group	uncultured_bacterium
137a52edba6be44a89b837de8d735f59	482	Bacteria;Firmicutes;Clostridia;Lachnospirales;Lachnospiraceae;Lachnospiraceae_NK4A136_group;uncultured_bacterium	Firmicutes	Clostridia	Lachnospirales	Lachnospiraceae	Lachnospiraceae_NK4A136_group	uncultured_bacterium
13855718543a261c2b41b3b3e6e08eec	518	Bacteria;Firmicutes;Clostridia;Oscillospirales;Oscillospiraceae;UCG-005;uncultured_bacterium	Firmicutes	Clostridia	Oscillospirales	Oscillospiraceae	UCG-005	uncultured_bacterium
138a78f1c83f9323c44013166a4e7ccf	472	Bacteria;Firmicutes;Clostridia;Lachnospirales;Lachnospiraceae;Lachnoclostridium;__	Firmicutes	Clostridia	Lachnospirales	Lachnospiraceae	Lachnoclostridium
139fc1725b91716e88888f7fac7f6589	438	Bacteria;Firmicutes;Clostridia;Clostridia_vadinBB60_group;Clostridia_vadinBB60_group;Clostridia_vadinBB60_group;uncultured_bacterium	Firmicutes	Clostridia	Clostridia_vadinBB60_group	Clostridia_vadinBB60_group	Clostridia_vadinBB60_group	uncultured_bacterium
13a55224063e8b859c956e119cbfa36d	574	Bacteria;Proteobacteria;Alphaproteobacteria;Rickettsiales;uncultured;uncultured;uncultured_Alphaproteobacteria	Proteobacteria	Alphaproteobacteria	Rickettsiales	uncultured	uncultured	uncultured_Alphaproteobacteria
13aa26ad066185f73510c03d203821b4	342	Bacteria;Actinobacteriota;Actinobacteria;Micrococcales;Brevibacteriaceae;Brevibacterium;__	Actinobacteriota	Actinobacteria	Micrococcales	Brevibacteriaceae	Brevibacterium
13b46cf1270d01b55b038f55885480dc	584	Bacteria;Proteobacteria;Gammaproteobacteria;Pasteurellales;Pasteurellaceae;Haemophilus;__	Proteobacteria	Gammaproteobacteria	Pasteurellales	Pasteurellaceae	Haemophilus
13bceee6c9a38ceadfcf189c35930502	544	Bacteria;Firmicutes;Clostridia;Oscillospirales;Ruminococcaceae;uncultured;uncultured_bacterium	Firmicutes	Clostridia	Oscillospirales	Ruminococcaceae	uncultured	uncultured_bacterium
13c67923f50cce77e3238413f74eadb3	438	Bacteria;Firmicutes;Clostridia;Clostridia_vadinBB60_group;Clostridia_vadinBB60_group;Clostridia_vadinBB60_group;uncultured_bacterium	Firmicutes	Clostridia	Clostridia_vadinBB60_group	Clostridia_vadinBB60_group	Clostridia_vadinBB60_group	uncultured_bacterium
13c6da902dd15e2fd279899224ae4836	500	Bacteria;Firmicutes;Clostridia;Lachnospirales;Lachnospiraceae;uncultured;uncultured_bacterium	Firmicutes	Clostridia	Lachnospirales	Lachnospiraceae	uncultured	uncultured_bacterium
13cca2ef04a2fb687a1a81908a10ee6f	520	Bacteria;Firmicutes;Clostridia;Oscillospirales;Oscillospiraceae;UCG-007;__	Firmicutes	Clostridia	Oscillospirales	Oscillospiraceae	UCG-007
13d4106b80e4172398ffff07098fcf25	419	Bacteria;Firmicutes;Bacilli;RF39;RF39;RF39;uncultured_bacterium	Firmicutes	Bacilli	RF39	RF39	RF39	uncultured_bacterium
13d60ab0883d8d31108ea49148e69be8	523	Bacteria;Firmicutes;Clostridia;Oscillospirales;Oscillospiraceae;uncultured;uncultured_bacterium	Firmicutes	Clostridia	Oscillospirales	Oscillospiraceae	uncultured	uncultured_bacterium
13e7b6ef8b888addc0e362c1588ff4db	544	Bacteria;Firmicutes;Clostridia;Oscillospirales;Ruminococcaceae;uncultured;uncultured_bacterium	Firmicutes	Clostridia	Oscillospirales	Ruminococcaceae	uncultured	uncultured_bacterium
13f1ab1d1bc43af60f8a5777f5557193	399	Bacteria;Firmicutes;Bacilli;Erysipelotrichales;Erysipelotrichaceae;uncultured;__	Firmicutes	Bacilli	Erysipelotrichales	Erysipelotrichaceae	uncultured
13f43861ac3f1a92715ca7a3753b8a22	523	Bacteria;Firmicutes;Clostridia;Oscillospirales;Oscillospiraceae;uncultured;uncultured_bacterium	Firmicutes	Clostridia	Oscillospirales	Oscillospiraceae	uncultured	uncultured_bacterium
13feab2ab012e54a863028a9a19fd236	544	Bacteria;Firmicutes;Clostridia;Oscillospirales;Ruminococcaceae;uncultured;uncultured_bacterium	Firmicutes	Clostridia	Oscillospirales	Ruminococcaceae	uncultured	uncultured_bacterium
13ff39007272c590d1d2e85915a09a28	482	Bacteria;Firmicutes;Clostridia;Lachnospirales;Lachnospiraceae;Lachnospiraceae_NK4A136_group;uncultured_bacterium	Firmicutes	Clostridia	Lachnospirales	Lachnospiraceae	Lachnospiraceae_NK4A136_group	uncultured_bacterium
14137d7853e7e9c14927de97b822fd1e	456	Bacteria;Firmicutes;Clostridia;Lachnospirales;Lachnospiraceae;Acetitomaculum;uncultured_bacterium	Firmicutes	Clostridia	Lachnospirales	Lachnospiraceae	Acetitomaculum	uncultured_bacterium
1416f6857c227b1e462c05b4c91c84d9	438	Bacteria;Firmicutes;Clostridia;Clostridia_vadinBB60_group;Clostridia_vadinBB60_group;Clostridia_vadinBB60_group;uncultured_bacterium	Firmicutes	Clostridia	Clostridia_vadinBB60_group	Clostridia_vadinBB60_group	Clostridia_vadinBB60_group	uncultured_bacterium
142625c5a6ed9b5b97718aa59d2a47c2	360	Bacteria;Bacteroidota;Bacteroidia;Bacteroidales;Muribaculaceae;Muribaculaceae;uncultured_bacterium	Bacteroidota	Bacteroidia	Bacteroidales	Muribaculaceae	Muribaculaceae	uncultured_bacterium
142a1c6f866fa96ba7be1ca6a86480d5	523	Bacteria;Firmicutes;Clostridia;Oscillospirales;Oscillospiraceae;uncultured;uncultured_bacterium	Firmicutes	Clostridia	Oscillospirales	Oscillospiraceae	uncultured	uncultured_bacterium
14430d561ab4ee8fdcae475d3f589f18	523	Bacteria;Firmicutes;Clostridia;Oscillospirales;Oscillospiraceae;uncultured;uncultured_bacterium	Firmicutes	Clostridia	Oscillospirales	Oscillospiraceae	uncultured	uncultured_bacterium
14486af562c39d9c9cb8d35e3e60125b	523	Bacteria;Firmicutes;Clostridia;Oscillospirales;Oscillospiraceae;uncultured;uncultured_bacterium	Firmicutes	Clostridia	Oscillospirales	Oscillospiraceae	uncultured	uncultured_bacterium
147e4a17864bc97de5a1b28c9ab3bf15	419	Bacteria;Firmicutes;Bacilli;RF39;RF39;RF39;uncultured_bacterium	Firmicutes	Bacilli	RF39	RF39	RF39	uncultured_bacterium
14847ee18362eff4ee4c82d2dcb05d62	544	Bacteria;Firmicutes;Clostridia;Oscillospirales;Ruminococcaceae;uncultured;uncultured_bacterium	Firmicutes	Clostridia	Oscillospirales	Ruminococcaceae	uncultured	uncultured_bacterium
149885030dbdf113ce111ae616e3c69e	364	Bacteria;Bacteroidota;Bacteroidia;Bacteroidales;Rs-E47_termite_group;Rs-E47_termite_group;__	Bacteroidota	Bacteroidia	Bacteroidales	Rs-E47_termite_group	Rs-E47_termite_group
149d11ad52ba949be7f9c45cfb138bb8	563	Bacteria;Firmicutes;Syntrophomonadia;Syntrophomonadales;Syntrophomonadaceae;__;__	Firmicutes	Syntrophomonadia	Syntrophomonadales	Syntrophomonadaceae
14b88daeaf24e8bb9cde9f06bdb89213	454	Bacteria;Firmicutes;Clostridia;Lachnospirales;Lachnospiraceae;Acetatifactor;uncultured_bacterium	Firmicutes	Clostridia	Lachnospirales	Lachnospiraceae	Acetatifactor	uncultured_bacterium
14d0a2d3cd016e724d8e21e1cf24b09b	486	Bacteria;Firmicutes;Clostridia;Lachnospirales;Lachnospiraceae;Lachnospiraceae_UCG-001;uncultured_bacterium	Firmicutes	Clostridia	Lachnospirales	Lachnospiraceae	Lachnospiraceae_UCG-001	uncultured_bacterium
14f1140daa53fc9900c138fc236bb57f	472	Bacteria;Firmicutes;Clostridia;Lachnospirales;Lachnospiraceae;Lachnoclostridium;__	Firmicutes	Clostridia	Lachnospirales	Lachnospiraceae	Lachnoclostridium
14f1260326eaab41948c6c87a249259d	498	Bacteria;Firmicutes;Clostridia;Lachnospirales;Lachnospiraceae;__;__	Firmicutes	Clostridia	Lachnospirales	Lachnospiraceae
14f6b495065736ed0fec6979d2ec4257	500	Bacteria;Firmicutes;Clostridia;Lachnospirales;Lachnospiraceae;uncultured;uncultured_bacterium	Firmicutes	Clostridia	Lachnospirales	Lachnospiraceae	uncultured	uncultured_bacterium
14ff2060f99bb50a24897a800c053591	482	Bacteria;Firmicutes;Clostridia;Lachnospirales;Lachnospiraceae;Lachnospiraceae_NK4A136_group;uncultured_bacterium	Firmicutes	Clostridia	Lachnospirales	Lachnospiraceae	Lachnospiraceae_NK4A136_group	uncultured_bacterium
14ff57386eca5905726b06db350e169c	360	Bacteria;Bacteroidota;Bacteroidia;Bacteroidales;Muribaculaceae;Muribaculaceae;uncultured_bacterium	Bacteroidota	Bacteroidia	Bacteroidales	Muribaculaceae	Muribaculaceae	uncultured_bacterium
1504893616b2d0779b4d9fa9b648bfba	571	Bacteria;Proteobacteria;Alphaproteobacteria;Rhizobiales;Rhizobiales_Incertae_Sedis;Bauldia;uncultured_bacterium	Proteobacteria	Alphaproteobacteria	Rhizobiales	Rhizobiales_Incertae_Sedis	Bauldia	uncultured_bacterium
151be289729c0987587b5737273af03e	482	Bacteria;Firmicutes;Clostridia;Lachnospirales;Lachnospiraceae;Lachnospiraceae_NK4A136_group;uncultured_bacterium	Firmicutes	Clostridia	Lachnospirales	Lachnospiraceae	Lachnospiraceae_NK4A136_group	uncultured_bacterium
15256b0c324404ad22e04e51e542fdff	523	Bacteria;Firmicutes;Clostridia;Oscillospirales;Oscillospiraceae;uncultured;uncultured_bacterium	Firmicutes	Clostridia	Oscillospirales	Oscillospiraceae	uncultured	uncultured_bacterium
15296dce213120692e082bb219aa0e91	534	Bacteria;Firmicutes;Clostridia;Oscillospirales;Ruminococcaceae;Incertae_Sedis;uncultured_bacterium	Firmicutes	Clostridia	Oscillospirales	Ruminococcaceae	Incertae_Sedis	uncultured_bacterium
153288c479068d95ed99d2f183f1a54d	410	Bacteria;Firmicutes;Bacilli;Lactobacillales;Lactobacillaceae;Lactobacillus;__	Firmicutes	Bacilli	Lactobacillales	Lactobacillaceae	Lactobacillus
153711566e71499442893034803b8814	493	Bacteria;Firmicutes;Clostridia;Lachnospirales;Lachnospiraceae;Roseburia;uncultured_bacterium	Firmicutes	Clostridia	Lachnospirales	Lachnospiraceae	Roseburia	uncultured_bacterium
1537203496dd6e3d77b0559dfd619127	544	Bacteria;Firmicutes;Clostridia;Oscillospirales;Ruminococcaceae;uncultured;uncultured_bacterium	Firmicutes	Clostridia	Oscillospirales	Ruminococcaceae	uncultured	uncultured_bacterium
1537ff0357b43cf1eebdc4ea5ace1794	523	Bacteria;Firmicutes;Clostridia;Oscillospirales;Oscillospiraceae;uncultured;uncultured_bacterium	Firmicutes	Clostridia	Oscillospirales	Oscillospiraceae	uncultured	uncultured_bacterium
154306d2a550e75a92d6883ce4346712	487	Bacteria;Firmicutes;Clostridia;Lachnospirales;Lachnospiraceae;Lachnospiraceae_UCG-006;uncultured_bacterium	Firmicutes	Clostridia	Lachnospirales	Lachnospiraceae	Lachnospiraceae_UCG-006	uncultured_bacterium
15569b7f82b9ae289e5b08591bb94178	438	Bacteria;Firmicutes;Clostridia;Clostridia_vadinBB60_group;Clostridia_vadinBB60_group;Clostridia_vadinBB60_group;uncultured_bacterium	Firmicutes	Clostridia	Clostridia_vadinBB60_group	Clostridia_vadinBB60_group	Clostridia_vadinBB60_group	uncultured_bacterium
1557fbf0fe37d64221a3b22938d7cdb4	499	Bacteria;Firmicutes;Clostridia;Lachnospirales;Lachnospiraceae;uncultured;__	Firmicutes	Clostridia	Lachnospirales	Lachnospiraceae	uncultured
155bded10fce191c9d0804899795975b	547	Bacteria;Firmicutes;Clostridia;Peptococcales;Peptococcaceae;Peptococcus;__	Firmicutes	Clostridia	Peptococcales	Peptococcaceae	Peptococcus
157cbf6acf209e435d18e51d4d9b2fad	419	Bacteria;Firmicutes;Bacilli;RF39;RF39;RF39;uncultured_bacterium	Firmicutes	Bacilli	RF39	RF39	RF39	uncultured_bacterium
1583cc5258a36a782631089cfd12f2d0	472	Bacteria;Firmicutes;Clostridia;Lachnospirales;Lachnospiraceae;Lachnoclostridium;__	Firmicutes	Clostridia	Lachnospirales	Lachnospiraceae	Lachnoclostridium
1586fdb4a9a1ee5a60a1fffcc877ef6c	419	Bacteria;Firmicutes;Bacilli;RF39;RF39;RF39;uncultured_bacterium	Firmicutes	Bacilli	RF39	RF39	RF39	uncultured_bacterium
1592b93fff7ee026c44acb87293f4c71	486	Bacteria;Firmicutes;Clostridia;Lachnospirales;Lachnospiraceae;Lachnospiraceae_UCG-001;uncultured_bacterium	Firmicutes	Clostridia	Lachnospirales	Lachnospiraceae	Lachnospiraceae_UCG-001	uncultured_bacterium
15982308be2802b06048034b63e3e018	547	Bacteria;Firmicutes;Clostridia;Peptococcales;Peptococcaceae;Peptococcus;__	Firmicutes	Clostridia	Peptococcales	Peptococcaceae	Peptococcus
15b59010f069c49cb1202e155fb66113	482	Bacteria;Firmicutes;Clostridia;Lachnospirales;Lachnospiraceae;Lachnospiraceae_NK4A136_group;uncultured_bacterium	Firmicutes	Clostridia	Lachnospirales	Lachnospiraceae	Lachnospiraceae_NK4A136_group	uncultured_bacterium
15bc707320a2d3d583c4638e45e2da8f	363	Bacteria;Bacteroidota;Bacteroidia;Bacteroidales;Rikenellaceae;Rikenella;__	Bacteroidota	Bacteroidia	Bacteroidales	Rikenellaceae	Rikenella
15cc6943b4f611d537346fc3675c0fb4	360	Bacteria;Bacteroidota;Bacteroidia;Bacteroidales;Muribaculaceae;Muribaculaceae;uncultured_bacterium	Bacteroidota	Bacteroidia	Bacteroidales	Muribaculaceae	Muribaculaceae	uncultured_bacterium
15daa855fc440c3c61412d915713af4b	482	Bacteria;Firmicutes;Clostridia;Lachnospirales;Lachnospiraceae;Lachnospiraceae_NK4A136_group;uncultured_bacterium	Firmicutes	Clostridia	Lachnospirales	Lachnospiraceae	Lachnospiraceae_NK4A136_group	uncultured_bacterium
15e70ef89151527c510b6133a29d6efb	498	Bacteria;Firmicutes;Clostridia;Lachnospirales;Lachnospiraceae;__;__	Firmicutes	Clostridia	Lachnospirales	Lachnospiraceae
15ffa17f2b20c6465d91d7329a452703	500	Bacteria;Firmicutes;Clostridia;Lachnospirales;Lachnospiraceae;uncultured;uncultured_bacterium	Firmicutes	Clostridia	Lachnospirales	Lachnospiraceae	uncultured	uncultured_bacterium
160242afd72250939b99b8cf06467d7c	434	Bacteria;Firmicutes;Clostridia;Clostridia_UCG-014;Clostridia_UCG-014;Clostridia_UCG-014;uncultured_bacterium	Firmicutes	Clostridia	Clostridia_UCG-014	Clostridia_UCG-014	Clostridia_UCG-014	uncultured_bacterium
1603715d4e585f107414ce004656a5a9	473	Bacteria;Firmicutes;Clostridia;Lachnospirales;Lachnospiraceae;Lachnoclostridium;uncultured_bacterium	Firmicutes	Clostridia	Lachnospirales	Lachnospiraceae	Lachnoclostridium	uncultured_bacterium
160af5a7a93fa4bb75e57bb19b8b833b	473	Bacteria;Firmicutes;Clostridia;Lachnospirales;Lachnospiraceae;Lachnoclostridium;uncultured_bacterium	Firmicutes	Clostridia	Lachnospirales	Lachnospiraceae	Lachnoclostridium	uncultured_bacterium
16179f9e2948b8f42d62a40dbe9f57b0	463	Bacteria;Firmicutes;Clostridia;Lachnospirales;Lachnospiraceae;Blautia;uncultured_bacterium	Firmicutes	Clostridia	Lachnospirales	Lachnospiraceae	Blautia	uncultured_bacterium
161f0ee7e1c73403ecbfd69c358a6b55	523	Bacteria;Firmicutes;Clostridia;Oscillospirales;Oscillospiraceae;uncultured;uncultured_bacterium	Firmicutes	Clostridia	Oscillospirales	Oscillospiraceae	uncultured	uncultured_bacterium
163c6ccfa74f3ada459477d86a7030b9	438	Bacteria;Firmicutes;Clostridia;Clostridia_vadinBB60_group;Clostridia_vadinBB60_group;Clostridia_vadinBB60_group;uncultured_bacterium	Firmicutes	Clostridia	Clostridia_vadinBB60_group	Clostridia_vadinBB60_group	Clostridia_vadinBB60_group	uncultured_bacterium
16683a2a78cfaafcdeea01d4f9c71bc1	500	Bacteria;Firmicutes;Clostridia;Lachnospirales;Lachnospiraceae;uncultured;uncultured_bacterium	Firmicutes	Clostridia	Lachnospirales	Lachnospiraceae	uncultured	uncultured_bacterium
166a8abf6922dc362520f69164981b8e	500	Bacteria;Firmicutes;Clostridia;Lachnospirales;Lachnospiraceae;uncultured;uncultured_bacterium	Firmicutes	Clostridia	Lachnospirales	Lachnospiraceae	uncultured	uncultured_bacterium
166d2ef34617bdaae398a2033d252e41	523	Bacteria;Firmicutes;Clostridia;Oscillospirales;Oscillospiraceae;uncultured;uncultured_bacterium	Firmicutes	Clostridia	Oscillospirales	Oscillospiraceae	uncultured	uncultured_bacterium
166e63be05ca82a6c78bd38d6c2202ad	523	Bacteria;Firmicutes;Clostridia;Oscillospirales;Oscillospiraceae;uncultured;uncultured_bacterium	Firmicutes	Clostridia	Oscillospirales	Oscillospiraceae	uncultured	uncultured_bacterium
169e8a80c99d03240da9465fbaf93f41	360	Bacteria;Bacteroidota;Bacteroidia;Bacteroidales;Muribaculaceae;Muribaculaceae;uncultured_bacterium	Bacteroidota	Bacteroidia	Bacteroidales	Muribaculaceae	Muribaculaceae	uncultured_bacterium
169fceb3081b39eace234fa83642b060	482	Bacteria;Firmicutes;Clostridia;Lachnospirales;Lachnospiraceae;Lachnospiraceae_NK4A136_group;uncultured_bacterium	Firmicutes	Clostridia	Lachnospirales	Lachnospiraceae	Lachnospiraceae_NK4A136_group	uncultured_bacterium
16a5c591bca533391b5879017fae4cd1	542	Bacteria;Firmicutes;Clostridia;Oscillospirales;Ruminococcaceae;__;__	Firmicutes	Clostridia	Oscillospirales	Ruminococcaceae
16ac49f97f2bb6af2c44e239766dec13	360	Bacteria;Bacteroidota;Bacteroidia;Bacteroidales;Muribaculaceae;Muribaculaceae;uncultured_bacterium	Bacteroidota	Bacteroidia	Bacteroidales	Muribaculaceae	Muribaculaceae	uncultured_bacterium
16b7e4f3ca6f6b7e56a2ea58ca72d1e0	463	Bacteria;Firmicutes;Clostridia;Lachnospirales;Lachnospiraceae;Blautia;uncultured_bacterium	Firmicutes	Clostridia	Lachnospirales	Lachnospiraceae	Blautia	uncultured_bacterium
16b9d36be33207cab51b1edeb26478e2	438	Bacteria;Firmicutes;Clostridia;Clostridia_vadinBB60_group;Clostridia_vadinBB60_group;Clostridia_vadinBB60_group;uncultured_bacterium	Firmicutes	Clostridia	Clostridia_vadinBB60_group	Clostridia_vadinBB60_group	Clostridia_vadinBB60_group	uncultured_bacterium
16d529a2322527d369d88969e6fd6850	505	Bacteria;Firmicutes;Clostridia;Oscillospirales;Butyricicoccaceae;Butyricicoccus;uncultured_bacterium	Firmicutes	Clostridia	Oscillospirales	Butyricicoccaceae	Butyricicoccus	uncultured_bacterium
16d5439e02d8327cb2eb17eaadce0975	360	Bacteria;Bacteroidota;Bacteroidia;Bacteroidales;Muribaculaceae;Muribaculaceae;uncultured_bacterium	Bacteroidota	Bacteroidia	Bacteroidales	Muribaculaceae	Muribaculaceae	uncultured_bacterium
16e8c8e9071cf0b0711ac14d7954b92f	368	Bacteria;Cyanobacteria;Vampirivibrionia;Gastranaerophilales;Gastranaerophilales;Gastranaerophilales;__	Cyanobacteria	Vampirivibrionia	Gastranaerophilales	Gastranaerophilales	Gastranaerophilales
16e93ae1af43ca31531f8ec5558a11d4	500	Bacteria;Firmicutes;Clostridia;Lachnospirales;Lachnospiraceae;uncultured;uncultured_bacterium	Firmicutes	Clostridia	Lachnospirales	Lachnospiraceae	uncultured	uncultured_bacterium
16f5cf7f711778aa3b52bfd8d6e2ca13	523	Bacteria;Firmicutes;Clostridia;Oscillospirales;Oscillospiraceae;uncultured;uncultured_bacterium	Firmicutes	Clostridia	Oscillospirales	Oscillospiraceae	uncultured	uncultured_bacterium
170087907a842c3ba4a5b2f155614ce4	438	Bacteria;Firmicutes;Clostridia;Clostridia_vadinBB60_group;Clostridia_vadinBB60_group;Clostridia_vadinBB60_group;uncultured_bacterium	Firmicutes	Clostridia	Clostridia_vadinBB60_group	Clostridia_vadinBB60_group	Clostridia_vadinBB60_group	uncultured_bacterium
17169b50b654ac6858e1429d78acf4bb	424	Bacteria;Firmicutes;Bacilli;Staphylococcales;Staphylococcaceae;Staphylococcus;__	Firmicutes	Bacilli	Staphylococcales	Staphylococcaceae	Staphylococcus
172014dfbde06abb9e99e80b48b71855	425	Bacteria;Firmicutes;Bacilli;Thermoactinomycetales;Thermoactinomycetaceae;Thermoactinomyces;__	Firmicutes	Bacilli	Thermoactinomycetales	Thermoactinomycetaceae	Thermoactinomyces
1722e10e275bd7e68493a2c3452d9b8b	482	Bacteria;Firmicutes;Clostridia;Lachnospirales;Lachnospiraceae;Lachnospiraceae_NK4A136_group;uncultured_bacterium	Firmicutes	Clostridia	Lachnospirales	Lachnospiraceae	Lachnospiraceae_NK4A136_group	uncultured_bacterium
17239a51ba490f46bafe01c074bded88	498	Bacteria;Firmicutes;Clostridia;Lachnospirales;Lachnospiraceae;__;__	Firmicutes	Clostridia	Lachnospirales	Lachnospiraceae
1724b6ed1dab615fcc63aeb07e4af584	351	Bacteria;Actinobacteriota;Coriobacteriia;Coriobacteriales;Eggerthellaceae;Enterorhabdus;uncultured_bacterium	Actinobacteriota	Coriobacteriia	Coriobacteriales	Eggerthellaceae	Enterorhabdus	uncultured_bacterium
17348c98d27836af41462e1cb9b9b06c	482	Bacteria;Firmicutes;Clostridia;Lachnospirales;Lachnospiraceae;Lachnospiraceae_NK4A136_group;uncultured_bacterium	Firmicutes	Clostridia	Lachnospirales	Lachnospiraceae	Lachnospiraceae_NK4A136_group	uncultured_bacterium
173b99060feb373a5aa41098d347bc50	438	Bacteria;Firmicutes;Clostridia;Clostridia_vadinBB60_group;Clostridia_vadinBB60_group;Clostridia_vadinBB60_group;uncultured_bacterium	Firmicutes	Clostridia	Clostridia_vadinBB60_group	Clostridia_vadinBB60_group	Clostridia_vadinBB60_group	uncultured_bacterium
17574bd828576edf9794c236c7fb9949	523	Bacteria;Firmicutes;Clostridia;Oscillospirales;Oscillospiraceae;uncultured;uncultured_bacterium	Firmicutes	Clostridia	Oscillospirales	Oscillospiraceae	uncultured	uncultured_bacterium
1768b59706ba22fa92eb44aaf7d5b05b	362	Bacteria;Bacteroidota;Bacteroidia;Bacteroidales;Rikenellaceae;Alistipes;uncultured_bacterium	Bacteroidota	Bacteroidia	Bacteroidales	Rikenellaceae	Alistipes	uncultured_bacterium
176b92b66d7e57324952472eee2de72c	356	Bacteria;Bacteroidota;Bacteroidia;Bacteroidales;F082;F082;__	Bacteroidota	Bacteroidia	Bacteroidales	F082	F082
1777ca2b88108ea0c76c15774f16ae29	419	Bacteria;Firmicutes;Bacilli;RF39;RF39;RF39;uncultured_bacterium	Firmicutes	Bacilli	RF39	RF39	RF39	uncultured_bacterium
178aea4fd0934c9619e06422e9788274	482	Bacteria;Firmicutes;Clostridia;Lachnospirales;Lachnospiraceae;Lachnospiraceae_NK4A136_group;uncultured_bacterium	Firmicutes	Clostridia	Lachnospirales	Lachnospiraceae	Lachnospiraceae_NK4A136_group	uncultured_bacterium
178c4d9d4ad76ccabc18c457fa682d7f	498	Bacteria;Firmicutes;Clostridia;Lachnospirales;Lachnospiraceae;__;__	Firmicutes	Clostridia	Lachnospirales	Lachnospiraceae
1797c5e9b9b77248a26a9ba77f48c3b8	593	Bacteria;Spirochaetota;Spirochaetia;Spirochaetales;Spirochaetaceae;Termite_Treponema_cluster;__	Spirochaetota	Spirochaetia	Spirochaetales	Spirochaetaceae	Termite_Treponema_cluster
179c8862e55bafa46be036dbda9c70a3	410	Bacteria;Firmicutes;Bacilli;Lactobacillales;Lactobacillaceae;Lactobacillus;__	Firmicutes	Bacilli	Lactobacillales	Lactobacillaceae	Lactobacillus
17a1da68d18484bd5b8a2047c67545fc	500	Bacteria;Firmicutes;Clostridia;Lachnospirales;Lachnospiraceae;uncultured;uncultured_bacterium	Firmicutes	Clostridia	Lachnospirales	Lachnospiraceae	uncultured	uncultured_bacterium
17a6243096a1cfc7dff3ffd94f9bf11f	434	Bacteria;Firmicutes;Clostridia;Clostridia_UCG-014;Clostridia_UCG-014;Clostridia_UCG-014;uncultured_bacterium	Firmicutes	Clostridia	Clostridia_UCG-014	Clostridia_UCG-014	Clostridia_UCG-014	uncultured_bacterium
17ac37265ea67b71184f78570ad9d64c	419	Bacteria;Firmicutes;Bacilli;RF39;RF39;RF39;uncultured_bacterium	Firmicutes	Bacilli	RF39	RF39	RF39	uncultured_bacterium
17b34c504309f491dcaa43f5710e2e2a	434	Bacteria;Firmicutes;Clostridia;Clostridia_UCG-014;Clostridia_UCG-014;Clostridia_UCG-014;uncultured_bacterium	Firmicutes	Clostridia	Clostridia_UCG-014	Clostridia_UCG-014	Clostridia_UCG-014	uncultured_bacterium
17b5377ea8e48acdbd520a09e46e3fcd	482	Bacteria;Firmicutes;Clostridia;Lachnospirales;Lachnospiraceae;Lachnospiraceae_NK4A136_group;uncultured_bacterium	Firmicutes	Clostridia	Lachnospirales	Lachnospiraceae	Lachnospiraceae_NK4A136_group	uncultured_bacterium
17b5466f3479675aaf41c34534869eee	376	Bacteria;Desulfobacterota;Desulfovibrionia;Desulfovibrionales;Desulfovibrionaceae;Desulfovibrio;__	Desulfobacterota	Desulfovibrionia	Desulfovibrionales	Desulfovibrionaceae	Desulfovibrio
17c77d2d398fc7d3915651a29b5ee8e1	598	Bacteria;Verrucomicrobiota;Verrucomicrobiae;Opitutales;Puniceicoccaceae;uncultured;__	Verrucomicrobiota	Verrucomicrobiae	Opitutales	Puniceicoccaceae	uncultured
17db5c8e7d142878e1e7d0320395dc9b	500	Bacteria;Firmicutes;Clostridia;Lachnospirales;Lachnospiraceae;uncultured;uncultured_bacterium	Firmicutes	Clostridia	Lachnospirales	Lachnospiraceae	uncultured	uncultured_bacterium
17fb826ab1ef9f37c5ed83623922d223	521	Bacteria;Firmicutes;Clostridia;Oscillospirales;Oscillospiraceae;__;__	Firmicutes	Clostridia	Oscillospirales	Oscillospiraceae
17ffa4bda966805da1f547c435f0fcb2	419	Bacteria;Firmicutes;Bacilli;RF39;RF39;RF39;uncultured_bacterium	Firmicutes	Bacilli	RF39	RF39	RF39	uncultured_bacterium
1802127bb5af58887a1189e8a05cb4ae	482	Bacteria;Firmicutes;Clostridia;Lachnospirales;Lachnospiraceae;Lachnospiraceae_NK4A136_group;uncultured_bacterium	Firmicutes	Clostridia	Lachnospirales	Lachnospiraceae	Lachnospiraceae_NK4A136_group	uncultured_bacterium
1808d28af37d2d8b16a6b51e730fb325	362	Bacteria;Bacteroidota;Bacteroidia;Bacteroidales;Rikenellaceae;Alistipes;uncultured_bacterium	Bacteroidota	Bacteroidia	Bacteroidales	Rikenellaceae	Alistipes	uncultured_bacterium
181875de1f0c53b35393fd254fb764cf	419	Bacteria;Firmicutes;Bacilli;RF39;RF39;RF39;uncultured_bacterium	Firmicutes	Bacilli	RF39	RF39	RF39	uncultured_bacterium
181c6d97ea6e3f4eb0cb9ccf6638835e	482	Bacteria;Firmicutes;Clostridia;Lachnospirales;Lachnospiraceae;Lachnospiraceae_NK4A136_group;uncultured_bacterium	Firmicutes	Clostridia	Lachnospirales	Lachnospiraceae	Lachnospiraceae_NK4A136_group	uncultured_bacterium
181eee173db7526d434ea71bef7a0073	534	Bacteria;Firmicutes;Clostridia;Oscillospirales;Ruminococcaceae;Incertae_Sedis;uncultured_bacterium	Firmicutes	Clostridia	Oscillospirales	Ruminococcaceae	Incertae_Sedis	uncultured_bacterium
1822b10120ad574eecdb8b68a48f63db	397	Bacteria;Firmicutes;Bacilli;Erysipelotrichales;Erysipelotrichaceae;Ileibacterium;__	Firmicutes	Bacilli	Erysipelotrichales	Erysipelotrichaceae	Ileibacterium
1833041c088d77d76aa003ba91f933d6	498	Bacteria;Firmicutes;Clostridia;Lachnospirales;Lachnospiraceae;__;__	Firmicutes	Clostridia	Lachnospirales	Lachnospiraceae
18366d6e0e873654575f1326926e4928	512	Bacteria;Firmicutes;Clostridia;Oscillospirales;Oscillospiraceae;NK4A214_group;uncultured_bacterium	Firmicutes	Clostridia	Oscillospirales	Oscillospiraceae	NK4A214_group	uncultured_bacterium
1838ee2556bcf3b94ee5b00ff5cbda1d	523	Bacteria;Firmicutes;Clostridia;Oscillospirales;Oscillospiraceae;uncultured;uncultured_bacterium	Firmicutes	Clostridia	Oscillospirales	Oscillospiraceae	uncultured	uncultured_bacterium
1848591c47836e1ed65156709186c5d0	500	Bacteria;Firmicutes;Clostridia;Lachnospirales;Lachnospiraceae;uncultured;uncultured_bacterium	Firmicutes	Clostridia	Lachnospirales	Lachnospiraceae	uncultured	uncultured_bacterium
185ea8bcd47c6445664234712d71b000	517	Bacteria;Firmicutes;Clostridia;Oscillospirales;Oscillospiraceae;UCG-005;__	Firmicutes	Clostridia	Oscillospirales	Oscillospiraceae	UCG-005
185f50070546157c35b24854e223a612	360	Bacteria;Bacteroidota;Bacteroidia;Bacteroidales;Muribaculaceae;Muribaculaceae;uncultured_bacterium	Bacteroidota	Bacteroidia	Bacteroidales	Muribaculaceae	Muribaculaceae	uncultured_bacterium
1865c23e97408740359ba28774125039	419	Bacteria;Firmicutes;Bacilli;RF39;RF39;RF39;uncultured_bacterium	Firmicutes	Bacilli	RF39	RF39	RF39	uncultured_bacterium
187878c810e3f32951c8e0836f34c7ec	482	Bacteria;Firmicutes;Clostridia;Lachnospirales;Lachnospiraceae;Lachnospiraceae_NK4A136_group;uncultured_bacterium	Firmicutes	Clostridia	Lachnospirales	Lachnospiraceae	Lachnospiraceae_NK4A136_group	uncultured_bacterium
18843a8b21a05eeb4fc0a6635cdaf3f6	438	Bacteria;Firmicutes;Clostridia;Clostridia_vadinBB60_group;Clostridia_vadinBB60_group;Clostridia_vadinBB60_group;uncultured_bacterium	Firmicutes	Clostridia	Clostridia_vadinBB60_group	Clostridia_vadinBB60_group	Clostridia_vadinBB60_group	uncultured_bacterium
188a1340baed5d71d0424683224fbfa1	482	Bacteria;Firmicutes;Clostridia;Lachnospirales;Lachnospiraceae;Lachnospiraceae_NK4A136_group;uncultured_bacterium	Firmicutes	Clostridia	Lachnospirales	Lachnospiraceae	Lachnospiraceae_NK4A136_group	uncultured_bacterium
18905cc5614080ca309d4009620d7f6c	486	Bacteria;Firmicutes;Clostridia;Lachnospirales;Lachnospiraceae;Lachnospiraceae_UCG-001;uncultured_bacterium	Firmicutes	Clostridia	Lachnospirales	Lachnospiraceae	Lachnospiraceae_UCG-001	uncultured_bacterium
18a323dcb2a08f861553915782c49fc9	500	Bacteria;Firmicutes;Clostridia;Lachnospirales;Lachnospiraceae;uncultured;uncultured_bacterium	Firmicutes	Clostridia	Lachnospirales	Lachnospiraceae	uncultured	uncultured_bacterium
18a74e6f7e6b6a7af369b9ffcd06d053	360	Bacteria;Bacteroidota;Bacteroidia;Bacteroidales;Muribaculaceae;Muribaculaceae;uncultured_bacterium	Bacteroidota	Bacteroidia	Bacteroidales	Muribaculaceae	Muribaculaceae	uncultured_bacterium
18b45784688067f0d5042e188761eebb	523	Bacteria;Firmicutes;Clostridia;Oscillospirales;Oscillospiraceae;uncultured;uncultured_bacterium	Firmicutes	Clostridia	Oscillospirales	Oscillospiraceae	uncultured	uncultured_bacterium
18b54942a9a557f9eee4a3c9ef7e2fd4	500	Bacteria;Firmicutes;Clostridia;Lachnospirales;Lachnospiraceae;uncultured;uncultured_bacterium	Firmicutes	Clostridia	Lachnospirales	Lachnospiraceae	uncultured	uncultured_bacterium
18d6d4eb924681fd231f5db9ac17cf5d	482	Bacteria;Firmicutes;Clostridia;Lachnospirales;Lachnospiraceae;Lachnospiraceae_NK4A136_group;uncultured_bacterium	Firmicutes	Clostridia	Lachnospirales	Lachnospiraceae	Lachnospiraceae_NK4A136_group	uncultured_bacterium
18df1db7ea997988f2c1852843f793aa	482	Bacteria;Firmicutes;Clostridia;Lachnospirales;Lachnospiraceae;Lachnospiraceae_NK4A136_group;uncultured_bacterium	Firmicutes	Clostridia	Lachnospirales	Lachnospiraceae	Lachnospiraceae_NK4A136_group	uncultured_bacterium
18df515b896d4bec46f7dc16f427677c	534	Bacteria;Firmicutes;Clostridia;Oscillospirales;Ruminococcaceae;Incertae_Sedis;uncultured_bacterium	Firmicutes	Clostridia	Oscillospirales	Ruminococcaceae	Incertae_Sedis	uncultured_bacterium
18df70dce0170d1340a791dd1732221f	377	Bacteria;Desulfobacterota;Desulfovibrionia;Desulfovibrionales;Desulfovibrionaceae;Desulfovibrio;uncultured_bacterium	Desulfobacterota	Desulfovibrionia	Desulfovibrionales	Desulfovibrionaceae	Desulfovibrio	uncultured_bacterium
19082ee17dbcfe326147d2d025957d5f	523	Bacteria;Firmicutes;Clostridia;Oscillospirales;Oscillospiraceae;uncultured;uncultured_bacterium	Firmicutes	Clostridia	Oscillospirales	Oscillospiraceae	uncultured	uncultured_bacterium
191c8dfe7b85c57a97ac6d10bcca75e1	493	Bacteria;Firmicutes;Clostridia;Lachnospirales;Lachnospiraceae;Roseburia;uncultured_bacterium	Firmicutes	Clostridia	Lachnospirales	Lachnospiraceae	Roseburia	uncultured_bacterium
192c53076253d384e265c1302ad5dc8b	377	Bacteria;Desulfobacterota;Desulfovibrionia;Desulfovibrionales;Desulfovibrionaceae;Desulfovibrio;uncultured_bacterium	Desulfobacterota	Desulfovibrionia	Desulfovibrionales	Desulfovibrionaceae	Desulfovibrio	uncultured_bacterium
194a3c9de9987059507f2581457ccad7	574	Bacteria;Proteobacteria;Alphaproteobacteria;Rickettsiales;uncultured;uncultured;uncultured_Alphaproteobacteria	Proteobacteria	Alphaproteobacteria	Rickettsiales	uncultured	uncultured	uncultured_Alphaproteobacteria
1959c62a95cb7ea2c36386e88e0449d4	498	Bacteria;Firmicutes;Clostridia;Lachnospirales;Lachnospiraceae;__;__	Firmicutes	Clostridia	Lachnospirales	Lachnospiraceae
196daba80b8a66086cf0c3631ea2210e	496	Bacteria;Firmicutes;Clostridia;Lachnospirales;Lachnospiraceae;Tyzzerella;uncultured_bacterium	Firmicutes	Clostridia	Lachnospirales	Lachnospiraceae	Tyzzerella	uncultured_bacterium
1981e3444507bf8df8cf9e173a0b2c02	486	Bacteria;Firmicutes;Clostridia;Lachnospirales;Lachnospiraceae;Lachnospiraceae_UCG-001;uncultured_bacterium	Firmicutes	Clostridia	Lachnospirales	Lachnospiraceae	Lachnospiraceae_UCG-001	uncultured_bacterium
1989c38900a79ca39c0872dd52b91d43	351	Bacteria;Actinobacteriota;Coriobacteriia;Coriobacteriales;Eggerthellaceae;Enterorhabdus;uncultured_bacterium	Actinobacteriota	Coriobacteriia	Coriobacteriales	Eggerthellaceae	Enterorhabdus	uncultured_bacterium
198cd10656201f7153dd2f15e1da5886	523	Bacteria;Firmicutes;Clostridia;Oscillospirales;Oscillospiraceae;uncultured;uncultured_bacterium	Firmicutes	Clostridia	Oscillospirales	Oscillospiraceae	uncultured	uncultured_bacterium
198dfcbb7b15d653d2241191666494d3	364	Bacteria;Bacteroidota;Bacteroidia;Bacteroidales;Rs-E47_termite_group;Rs-E47_termite_group;__	Bacteroidota	Bacteroidia	Bacteroidales	Rs-E47_termite_group	Rs-E47_termite_group
199a1f61f929cbddbb578bb5386fb48e	500	Bacteria;Firmicutes;Clostridia;Lachnospirales;Lachnospiraceae;uncultured;uncultured_bacterium	Firmicutes	Clostridia	Lachnospirales	Lachnospiraceae	uncultured	uncultured_bacterium
199d7e9e090a89a50693bad6c3d607c3	415	Bacteria;Firmicutes;Bacilli;Lactobacillales;Streptococcaceae;Streptococcus;__	Firmicutes	Bacilli	Lactobacillales	Streptococcaceae	Streptococcus
19e0d0bf3834f544dce0f7c05a6ac8dc	471	Bacteria;Firmicutes;Clostridia;Lachnospirales;Lachnospiraceae;GCA-900066575;uncultured_bacterium	Firmicutes	Clostridia	Lachnospirales	Lachnospiraceae	GCA-900066575	uncultured_bacterium
19eb0b74881ffbcf4b3e5a40d184e2a2	438	Bacteria;Firmicutes;Clostridia;Clostridia_vadinBB60_group;Clostridia_vadinBB60_group;Clostridia_vadinBB60_group;uncultured_bacterium	Firmicutes	Clostridia	Clostridia_vadinBB60_group	Clostridia_vadinBB60_group	Clostridia_vadinBB60_group	uncultured_bacterium
19f0c6d110baf5c6e06c46168984bc8a	482	Bacteria;Firmicutes;Clostridia;Lachnospirales;Lachnospiraceae;Lachnospiraceae_NK4A136_group;uncultured_bacterium	Firmicutes	Clostridia	Lachnospirales	Lachnospiraceae	Lachnospiraceae_NK4A136_group	uncultured_bacterium
1a041dba8cd57ad112d9a41a73576a14	473	Bacteria;Firmicutes;Clostridia;Lachnospirales;Lachnospiraceae;Lachnoclostridium;uncultured_bacterium	Firmicutes	Clostridia	Lachnospirales	Lachnospiraceae	Lachnoclostridium	uncultured_bacterium
1a0f2c67efc11b0ea5ec1c590066a26a	349	Bacteria;Actinobacteriota;Coriobacteriia;Coriobacteriales;Eggerthellaceae;Adlercreutzia;__	Actinobacteriota	Coriobacteriia	Coriobacteriales	Eggerthellaceae	Adlercreutzia
1a1603725be8d947c657b311bb031987	493	Bacteria;Firmicutes;Clostridia;Lachnospirales;Lachnospiraceae;Roseburia;uncultured_bacterium	Firmicutes	Clostridia	Lachnospirales	Lachnospiraceae	Roseburia	uncultured_bacterium
1a4107aa37ef57e54ff29cd70ecd7141	434	Bacteria;Firmicutes;Clostridia;Clostridia_UCG-014;Clostridia_UCG-014;Clostridia_UCG-014;uncultured_bacterium	Firmicutes	Clostridia	Clostridia_UCG-014	Clostridia_UCG-014	Clostridia_UCG-014	uncultured_bacterium
1a4184173e0032afa247a816e15df63a	500	Bacteria;Firmicutes;Clostridia;Lachnospirales;Lachnospiraceae;uncultured;uncultured_bacterium	Firmicutes	Clostridia	Lachnospirales	Lachnospiraceae	uncultured	uncultured_bacterium
1a64b45dab974c30a60b144dcddf0eeb	498	Bacteria;Firmicutes;Clostridia;Lachnospirales;Lachnospiraceae;__;__	Firmicutes	Clostridia	Lachnospirales	Lachnospiraceae
1a6afd8f4dc28b43988cc23258f3430a	493	Bacteria;Firmicutes;Clostridia;Lachnospirales;Lachnospiraceae;Roseburia;uncultured_bacterium	Firmicutes	Clostridia	Lachnospirales	Lachnospiraceae	Roseburia	uncultured_bacterium
1a73771f4f0f01f3fe4933c9914d42e0	482	Bacteria;Firmicutes;Clostridia;Lachnospirales;Lachnospiraceae;Lachnospiraceae_NK4A136_group;uncultured_bacterium	Firmicutes	Clostridia	Lachnospirales	Lachnospiraceae	Lachnospiraceae_NK4A136_group	uncultured_bacterium
1a788d2194f94348541f8aab5bb209f5	500	Bacteria;Firmicutes;Clostridia;Lachnospirales;Lachnospiraceae;uncultured;uncultured_bacterium	Firmicutes	Clostridia	Lachnospirales	Lachnospiraceae	uncultured	uncultured_bacterium
1a8ac90367336eb59c877b0ef68e2c73	418	Bacteria;Firmicutes;Bacilli;RF39;RF39;RF39;__	Firmicutes	Bacilli	RF39	RF39	RF39
1a8f0fece0c3edb208389871a4ec8779	482	Bacteria;Firmicutes;Clostridia;Lachnospirales;Lachnospiraceae;Lachnospiraceae_NK4A136_group;uncultured_bacterium	Firmicutes	Clostridia	Lachnospirales	Lachnospiraceae	Lachnospiraceae_NK4A136_group	uncultured_bacterium
1aacbab874375085c874b85b587c57b8	537	Bacteria;Firmicutes;Clostridia;Oscillospirales;Ruminococcaceae;Ruminococcaceae;uncultured_bacterium	Firmicutes	Clostridia	Oscillospirales	Ruminococcaceae	Ruminococcaceae	uncultured_bacterium
1ab08d0f64174111851af7a84ffb028e	523	Bacteria;Firmicutes;Clostridia;Oscillospirales;Oscillospiraceae;uncultured;uncultured_bacterium	Firmicutes	Clostridia	Oscillospirales	Oscillospiraceae	uncultured	uncultured_bacterium
1abff81bd05ea6b5bf23725749cdd0c2	498	Bacteria;Firmicutes;Clostridia;Lachnospirales;Lachnospiraceae;__;__	Firmicutes	Clostridia	Lachnospirales	Lachnospiraceae
1acb9a2d21672de16debc05b00304a59	437	Bacteria;Firmicutes;Clostridia;Clostridia_vadinBB60_group;Clostridia_vadinBB60_group;Clostridia_vadinBB60_group;__	Firmicutes	Clostridia	Clostridia_vadinBB60_group	Clostridia_vadinBB60_group	Clostridia_vadinBB60_group
1acbeb8cd38ab5409c718ab9fbce244b	434	Bacteria;Firmicutes;Clostridia;Clostridia_UCG-014;Clostridia_UCG-014;Clostridia_UCG-014;uncultured_bacterium	Firmicutes	Clostridia	Clostridia_UCG-014	Clostridia_UCG-014	Clostridia_UCG-014	uncultured_bacterium
1ae1946f473609ba59cf29db14a0c133	500	Bacteria;Firmicutes;Clostridia;Lachnospirales;Lachnospiraceae;uncultured;uncultured_bacterium	Firmicutes	Clostridia	Lachnospirales	Lachnospiraceae	uncultured	uncultured_bacterium
1ae93776d96468621d8906cdd111dbfc	523	Bacteria;Firmicutes;Clostridia;Oscillospirales;Oscillospiraceae;uncultured;uncultured_bacterium	Firmicutes	Clostridia	Oscillospirales	Oscillospiraceae	uncultured	uncultured_bacterium
1af0775830a3cc71f0345ebf7745230a	486	Bacteria;Firmicutes;Clostridia;Lachnospirales;Lachnospiraceae;Lachnospiraceae_UCG-001;uncultured_bacterium	Firmicutes	Clostridia	Lachnospirales	Lachnospiraceae	Lachnospiraceae_UCG-001	uncultured_bacterium
1b1803a1f98e0186951c80f0c8761a3f	516	Bacteria;Firmicutes;Clostridia;Oscillospirales;Oscillospiraceae;UCG-003;uncultured_bacterium	Firmicutes	Clostridia	Oscillospirales	Oscillospiraceae	UCG-003	uncultured_bacterium
1b284212169bd327532b4f546e713cc0	498	Bacteria;Firmicutes;Clostridia;Lachnospirales;Lachnospiraceae;__;__	Firmicutes	Clostridia	Lachnospirales	Lachnospiraceae
1b29f6bb4ecef4eecf571e4ae9a984e4	482	Bacteria;Firmicutes;Clostridia;Lachnospirales;Lachnospiraceae;Lachnospiraceae_NK4A136_group;uncultured_bacterium	Firmicutes	Clostridia	Lachnospirales	Lachnospiraceae	Lachnospiraceae_NK4A136_group	uncultured_bacterium
1b2af0eff549a7cfecbc691a23775bbb	482	Bacteria;Firmicutes;Clostridia;Lachnospirales;Lachnospiraceae;Lachnospiraceae_NK4A136_group;uncultured_bacterium	Firmicutes	Clostridia	Lachnospirales	Lachnospiraceae	Lachnospiraceae_NK4A136_group	uncultured_bacterium
1b2c12cb9a6946746ebf63ed845a4945	360	Bacteria;Bacteroidota;Bacteroidia;Bacteroidales;Muribaculaceae;Muribaculaceae;uncultured_bacterium	Bacteroidota	Bacteroidia	Bacteroidales	Muribaculaceae	Muribaculaceae	uncultured_bacterium
1b414827d35568b5e03410c3ad77af7a	500	Bacteria;Firmicutes;Clostridia;Lachnospirales;Lachnospiraceae;uncultured;uncultured_bacterium	Firmicutes	Clostridia	Lachnospirales	Lachnospiraceae	uncultured	uncultured_bacterium
1b449f2b34c5c3d0a1382e08a2da50b0	360	Bacteria;Bacteroidota;Bacteroidia;Bacteroidales;Muribaculaceae;Muribaculaceae;uncultured_bacterium	Bacteroidota	Bacteroidia	Bacteroidales	Muribaculaceae	Muribaculaceae	uncultured_bacterium
1b4f92a5952336e9eb20bc88d229ba8a	438	Bacteria;Firmicutes;Clostridia;Clostridia_vadinBB60_group;Clostridia_vadinBB60_group;Clostridia_vadinBB60_group;uncultured_bacterium	Firmicutes	Clostridia	Clostridia_vadinBB60_group	Clostridia_vadinBB60_group	Clostridia_vadinBB60_group	uncultured_bacterium
1b52824d2113198d9f7c29ee37af286f	533	Bacteria;Firmicutes;Clostridia;Oscillospirales;Ruminococcaceae;Incertae_Sedis;__	Firmicutes	Clostridia	Oscillospirales	Ruminococcaceae	Incertae_Sedis
1b5610430945527719cf858cd6f912da	351	Bacteria;Actinobacteriota;Coriobacteriia;Coriobacteriales;Eggerthellaceae;Enterorhabdus;uncultured_bacterium	Actinobacteriota	Coriobacteriia	Coriobacteriales	Eggerthellaceae	Enterorhabdus	uncultured_bacterium
1b711f5765a9c2a5079da11929c92498	377	Bacteria;Desulfobacterota;Desulfovibrionia;Desulfovibrionales;Desulfovibrionaceae;Desulfovibrio;uncultured_bacterium	Desulfobacterota	Desulfovibrionia	Desulfovibrionales	Desulfovibrionaceae	Desulfovibrio	uncultured_bacterium
1b91b9cf477d3cc322ffb58a92e8675c	534	Bacteria;Firmicutes;Clostridia;Oscillospirales;Ruminococcaceae;Incertae_Sedis;uncultured_bacterium	Firmicutes	Clostridia	Oscillospirales	Ruminococcaceae	Incertae_Sedis	uncultured_bacterium
1b95d9a1fc96f39228d0264968745b2f	375	Bacteria;Desulfobacterota;Desulfovibrionia;Desulfovibrionales;Desulfovibrionaceae;Desulfovibrio;Desulfovibrio_hydrothermalis	Desulfobacterota	Desulfovibrionia	Desulfovibrionales	Desulfovibrionaceae	Desulfovibrio	Desulfovibrio_hydrothermalis
1b9ab7ba8573cbfe5f1a9f59f0b38ff4	349	Bacteria;Actinobacteriota;Coriobacteriia;Coriobacteriales;Eggerthellaceae;Adlercreutzia;__	Actinobacteriota	Coriobacteriia	Coriobacteriales	Eggerthellaceae	Adlercreutzia
1bafe2718d9c0cc58a98eeee81340ec3	419	Bacteria;Firmicutes;Bacilli;RF39;RF39;RF39;uncultured_bacterium	Firmicutes	Bacilli	RF39	RF39	RF39	uncultured_bacterium
1bb3a84757344f42a5a8763e8e9fee37	360	Bacteria;Bacteroidota;Bacteroidia;Bacteroidales;Muribaculaceae;Muribaculaceae;uncultured_bacterium	Bacteroidota	Bacteroidia	Bacteroidales	Muribaculaceae	Muribaculaceae	uncultured_bacterium
1bb5a4a2493450c0a006525451de740f	498	Bacteria;Firmicutes;Clostridia;Lachnospirales;Lachnospiraceae;__;__	Firmicutes	Clostridia	Lachnospirales	Lachnospiraceae
1bbfe0066c971a9343718fb222702e52	482	Bacteria;Firmicutes;Clostridia;Lachnospirales;Lachnospiraceae;Lachnospiraceae_NK4A136_group;uncultured_bacterium	Firmicutes	Clostridia	Lachnospirales	Lachnospiraceae	Lachnospiraceae_NK4A136_group	uncultured_bacterium
1bd7e937f0e5ae0c2bd178021092a5a6	419	Bacteria;Firmicutes;Bacilli;RF39;RF39;RF39;uncultured_bacterium	Firmicutes	Bacilli	RF39	RF39	RF39	uncultured_bacterium
1be1ce357a7f123bb83dc19a1c8ef9b3	360	Bacteria;Bacteroidota;Bacteroidia;Bacteroidales;Muribaculaceae;Muribaculaceae;uncultured_bacterium	Bacteroidota	Bacteroidia	Bacteroidales	Muribaculaceae	Muribaculaceae	uncultured_bacterium
1be4b9b0172a009751a4542ea977c480	541	Bacteria;Firmicutes;Clostridia;Oscillospirales;Ruminococcaceae;UBA1819;uncultured_organism	Firmicutes	Clostridia	Oscillospirales	Ruminococcaceae	UBA1819	uncultured_organism
1be667a6b0211da8b368beb479435c43	362	Bacteria;Bacteroidota;Bacteroidia;Bacteroidales;Rikenellaceae;Alistipes;uncultured_bacterium	Bacteroidota	Bacteroidia	Bacteroidales	Rikenellaceae	Alistipes	uncultured_bacterium
1be7d5f2a0c46938fd2acfdcbfd18244	498	Bacteria;Firmicutes;Clostridia;Lachnospirales;Lachnospiraceae;__;__	Firmicutes	Clostridia	Lachnospirales	Lachnospiraceae
1c15b2a2e2d14a0ea74ebea2d938e2aa	493	Bacteria;Firmicutes;Clostridia;Lachnospirales;Lachnospiraceae;Roseburia;uncultured_bacterium	Firmicutes	Clostridia	Lachnospirales	Lachnospiraceae	Roseburia	uncultured_bacterium
1c15bb9a502695e7284158a64c5bc188	500	Bacteria;Firmicutes;Clostridia;Lachnospirales;Lachnospiraceae;uncultured;uncultured_bacterium	Firmicutes	Clostridia	Lachnospirales	Lachnospiraceae	uncultured	uncultured_bacterium
1c20da86ca95da469fa8e3b07744b958	456	Bacteria;Firmicutes;Clostridia;Lachnospirales;Lachnospiraceae;Acetitomaculum;uncultured_bacterium	Firmicutes	Clostridia	Lachnospirales	Lachnospiraceae	Acetitomaculum	uncultured_bacterium
1c4c39507913df365656f45e31e466f1	438	Bacteria;Firmicutes;Clostridia;Clostridia_vadinBB60_group;Clostridia_vadinBB60_group;Clostridia_vadinBB60_group;uncultured_bacterium	Firmicutes	Clostridia	Clostridia_vadinBB60_group	Clostridia_vadinBB60_group	Clostridia_vadinBB60_group	uncultured_bacterium
1c5756f2a8b30b9e155a3b78f8c1770f	360	Bacteria;Bacteroidota;Bacteroidia;Bacteroidales;Muribaculaceae;Muribaculaceae;uncultured_bacterium	Bacteroidota	Bacteroidia	Bacteroidales	Muribaculaceae	Muribaculaceae	uncultured_bacterium
1c6c4505d376a456ab2c4d091dab9c17	419	Bacteria;Firmicutes;Bacilli;RF39;RF39;RF39;uncultured_bacterium	Firmicutes	Bacilli	RF39	RF39	RF39	uncultured_bacterium
1c6fbae7855190f53293608eb7f9da82	482	Bacteria;Firmicutes;Clostridia;Lachnospirales;Lachnospiraceae;Lachnospiraceae_NK4A136_group;uncultured_bacterium	Firmicutes	Clostridia	Lachnospirales	Lachnospiraceae	Lachnospiraceae_NK4A136_group	uncultured_bacterium
1c7bdc6ae38c4f7a437813380e5de8d3	418	Bacteria;Firmicutes;Bacilli;RF39;RF39;RF39;__	Firmicutes	Bacilli	RF39	RF39	RF39
1c82b9c4d139a7f0f7a308a4e6ce8396	447	Bacteria;Firmicutes;Clostridia;Lachnospirales;Lachnospiraceae;[Eubacterium]_xylanophilum_group;uncultured_bacterium	Firmicutes	Clostridia	Lachnospirales	Lachnospiraceae	[Eubacterium]_xylanophilum_group	uncultured_bacterium
1c846cae71bb09113b2572668279a4a1	438	Bacteria;Firmicutes;Clostridia;Clostridia_vadinBB60_group;Clostridia_vadinBB60_group;Clostridia_vadinBB60_group;uncultured_bacterium	Firmicutes	Clostridia	Clostridia_vadinBB60_group	Clostridia_vadinBB60_group	Clostridia_vadinBB60_group	uncultured_bacterium
1c99d82fc0b7470ed0c91ccebfe7a3b2	479	Bacteria;Firmicutes;Clostridia;Lachnospirales;Lachnospiraceae;Lachnospiraceae_FCS020_group;uncultured_bacterium	Firmicutes	Clostridia	Lachnospirales	Lachnospiraceae	Lachnospiraceae_FCS020_group	uncultured_bacterium
1ca1f0579c3717ff014e2bd6d61e52b8	500	Bacteria;Firmicutes;Clostridia;Lachnospirales;Lachnospiraceae;uncultured;uncultured_bacterium	Firmicutes	Clostridia	Lachnospirales	Lachnospiraceae	uncultured	uncultured_bacterium
1ca4bde8aff8fa5c513d69a262086d9c	559	Bacteria;Firmicutes;Clostridia;__;__;__;__	Firmicutes	Clostridia
1ca80f35969fceef1bdb31791b054e7a	429	Bacteria;Firmicutes;Clostridia;Christensenellales;Christensenellaceae;__;__	Firmicutes	Clostridia	Christensenellales	Christensenellaceae
1ca9b3ebfcc37b324ffa17913ad6d27a	505	Bacteria;Firmicutes;Clostridia;Oscillospirales;Butyricicoccaceae;Butyricicoccus;uncultured_bacterium	Firmicutes	Clostridia	Oscillospirales	Butyricicoccaceae	Butyricicoccus	uncultured_bacterium
1cae89dcaa0ad9efc2a5338e723d40ca	498	Bacteria;Firmicutes;Clostridia;Lachnospirales;Lachnospiraceae;__;__	Firmicutes	Clostridia	Lachnospirales	Lachnospiraceae
1cb29320cfadb3e38b0deb23384d0bd2	418	Bacteria;Firmicutes;Bacilli;RF39;RF39;RF39;__	Firmicutes	Bacilli	RF39	RF39	RF39
1cb6b550086d7c03ddc919a3ee6f5996	537	Bacteria;Firmicutes;Clostridia;Oscillospirales;Ruminococcaceae;Ruminococcaceae;uncultured_bacterium	Firmicutes	Clostridia	Oscillospirales	Ruminococcaceae	Ruminococcaceae	uncultured_bacterium
1cbcf281b01c7965b72209dfda2e6827	496	Bacteria;Firmicutes;Clostridia;Lachnospirales;Lachnospiraceae;Tyzzerella;uncultured_bacterium	Firmicutes	Clostridia	Lachnospirales	Lachnospiraceae	Tyzzerella	uncultured_bacterium
1cdbd6f3e9dc9d47cf24a6be12afe1e0	479	Bacteria;Firmicutes;Clostridia;Lachnospirales;Lachnospiraceae;Lachnospiraceae_FCS020_group;uncultured_bacterium	Firmicutes	Clostridia	Lachnospirales	Lachnospiraceae	Lachnospiraceae_FCS020_group	uncultured_bacterium
1ce28d11d89ef0da5e01f6febcb40163	351	Bacteria;Actinobacteriota;Coriobacteriia;Coriobacteriales;Eggerthellaceae;Enterorhabdus;uncultured_bacterium	Actinobacteriota	Coriobacteriia	Coriobacteriales	Eggerthellaceae	Enterorhabdus	uncultured_bacterium
1cf984a04274393d77cc6c35066f31bb	419	Bacteria;Firmicutes;Bacilli;RF39;RF39;RF39;uncultured_bacterium	Firmicutes	Bacilli	RF39	RF39	RF39	uncultured_bacterium
1cfa5a83968ebe47eaf4927b73369a6b	376	Bacteria;Desulfobacterota;Desulfovibrionia;Desulfovibrionales;Desulfovibrionaceae;Desulfovibrio;__	Desulfobacterota	Desulfovibrionia	Desulfovibrionales	Desulfovibrionaceae	Desulfovibrio
1d15496f56529c6ca32d7c6f2421cec8	505	Bacteria;Firmicutes;Clostridia;Oscillospirales;Butyricicoccaceae;Butyricicoccus;uncultured_bacterium	Firmicutes	Clostridia	Oscillospirales	Butyricicoccaceae	Butyricicoccus	uncultured_bacterium
1d1cf09274113b9a877e41aa93b11791	482	Bacteria;Firmicutes;Clostridia;Lachnospirales;Lachnospiraceae;Lachnospiraceae_NK4A136_group;uncultured_bacterium	Firmicutes	Clostridia	Lachnospirales	Lachnospiraceae	Lachnospiraceae_NK4A136_group	uncultured_bacterium
1d30391944324e104badd2838aa14bb3	379	Bacteria;Desulfobacterota;Desulfovibrionia;Desulfovibrionales;Desulfovibrionaceae;uncultured;__	Desulfobacterota	Desulfovibrionia	Desulfovibrionales	Desulfovibrionaceae	uncultured
1d527bab12ec58d89f0435dc8d0daa01	360	Bacteria;Bacteroidota;Bacteroidia;Bacteroidales;Muribaculaceae;Muribaculaceae;uncultured_bacterium	Bacteroidota	Bacteroidia	Bacteroidales	Muribaculaceae	Muribaculaceae	uncultured_bacterium
1d5c88a202bb1c5767dad3adf1da493e	498	Bacteria;Firmicutes;Clostridia;Lachnospirales;Lachnospiraceae;__;__	Firmicutes	Clostridia	Lachnospirales	Lachnospiraceae
1d619bd2afc60d8f9957be501a16ae2e	555	Bacteria;Firmicutes;Clostridia;Peptostreptococcales-Tissierellales;Anaerovoracaceae;Family_XIII_AD3011_group;uncultured_bacterium	Firmicutes	Clostridia	Peptostreptococcales-Tissierellales	Anaerovoracaceae	Family_XIII_AD3011_group	uncultured_bacterium
1d66a9e8cf724de4089a0577da0049c7	438	Bacteria;Firmicutes;Clostridia;Clostridia_vadinBB60_group;Clostridia_vadinBB60_group;Clostridia_vadinBB60_group;uncultured_bacterium	Firmicutes	Clostridia	Clostridia_vadinBB60_group	Clostridia_vadinBB60_group	Clostridia_vadinBB60_group	uncultured_bacterium
1d74b41a437c522add48307833108fdf	486	Bacteria;Firmicutes;Clostridia;Lachnospirales;Lachnospiraceae;Lachnospiraceae_UCG-001;uncultured_bacterium	Firmicutes	Clostridia	Lachnospirales	Lachnospiraceae	Lachnospiraceae_UCG-001	uncultured_bacterium
1d7c3b05921979c7e2a187e215bf0a4e	351	Bacteria;Actinobacteriota;Coriobacteriia;Coriobacteriales;Eggerthellaceae;Enterorhabdus;uncultured_bacterium	Actinobacteriota	Coriobacteriia	Coriobacteriales	Eggerthellaceae	Enterorhabdus	uncultured_bacterium
1d88e4caf3de999247f30e5274214926	574	Bacteria;Proteobacteria;Alphaproteobacteria;Rickettsiales;uncultured;uncultured;uncultured_Alphaproteobacteria	Proteobacteria	Alphaproteobacteria	Rickettsiales	uncultured	uncultured	uncultured_Alphaproteobacteria
1d8d5a4d16e4a27342ac89e50de2bcba	482	Bacteria;Firmicutes;Clostridia;Lachnospirales;Lachnospiraceae;Lachnospiraceae_NK4A136_group;uncultured_bacterium	Firmicutes	Clostridia	Lachnospirales	Lachnospiraceae	Lachnospiraceae_NK4A136_group	uncultured_bacterium
1d9ad7a3f16811e9a45ea730261ec3ab	500	Bacteria;Firmicutes;Clostridia;Lachnospirales;Lachnospiraceae;uncultured;uncultured_bacterium	Firmicutes	Clostridia	Lachnospirales	Lachnospiraceae	uncultured	uncultured_bacterium
1d9f73f0c0f91f7259607c419b180d33	500	Bacteria;Firmicutes;Clostridia;Lachnospirales;Lachnospiraceae;uncultured;uncultured_bacterium	Firmicutes	Clostridia	Lachnospirales	Lachnospiraceae	uncultured	uncultured_bacterium
1dc06c12e63fa54d1654d3bd79aa0748	482	Bacteria;Firmicutes;Clostridia;Lachnospirales;Lachnospiraceae;Lachnospiraceae_NK4A136_group;uncultured_bacterium	Firmicutes	Clostridia	Lachnospirales	Lachnospiraceae	Lachnospiraceae_NK4A136_group	uncultured_bacterium
1dcf016ca2371ec2c07fb62e4be7c27f	536	Bacteria;Firmicutes;Clostridia;Oscillospirales;Ruminococcaceae;Paludicola;uncultured_bacterium	Firmicutes	Clostridia	Oscillospirales	Ruminococcaceae	Paludicola	uncultured_bacterium
1dd21b2155bde6e592c5b6dbc65b3c10	523	Bacteria;Firmicutes;Clostridia;Oscillospirales;Oscillospiraceae;uncultured;uncultured_bacterium	Firmicutes	Clostridia	Oscillospirales	Oscillospiraceae	uncultured	uncultured_bacterium
1de287a0c23617eadfcfbcbce7f05323	466	Bacteria;Firmicutes;Clostridia;Lachnospirales;Lachnospiraceae;Dorea;__	Firmicutes	Clostridia	Lachnospirales	Lachnospiraceae	Dorea
1def14918c0bbb7b0cabb37a10896a98	520	Bacteria;Firmicutes;Clostridia;Oscillospirales;Oscillospiraceae;UCG-007;__	Firmicutes	Clostridia	Oscillospirales	Oscillospiraceae	UCG-007
1e01258762dd26233b745213df1dcd9a	351	Bacteria;Actinobacteriota;Coriobacteriia;Coriobacteriales;Eggerthellaceae;Enterorhabdus;uncultured_bacterium	Actinobacteriota	Coriobacteriia	Coriobacteriales	Eggerthellaceae	Enterorhabdus	uncultured_bacterium
1e06470f2e155409dcb758d4dfa069f6	433	Bacteria;Firmicutes;Clostridia;Clostridia_UCG-014;Clostridia_UCG-014;Clostridia_UCG-014;__	Firmicutes	Clostridia	Clostridia_UCG-014	Clostridia_UCG-014	Clostridia_UCG-014
1e1e5c8aeaa6d8aa11a66a93fe774531	549	Bacteria;Firmicutes;Clostridia;Peptococcales;Peptococcaceae;uncultured;uncultured_bacterium	Firmicutes	Clostridia	Peptococcales	Peptococcaceae	uncultured	uncultured_bacterium
1e3ae42360cc7599285c237472ec064e	434	Bacteria;Firmicutes;Clostridia;Clostridia_UCG-014;Clostridia_UCG-014;Clostridia_UCG-014;uncultured_bacterium	Firmicutes	Clostridia	Clostridia_UCG-014	Clostridia_UCG-014	Clostridia_UCG-014	uncultured_bacterium
1e47190c6833652207bf1944a4ec42fd	429	Bacteria;Firmicutes;Clostridia;Christensenellales;Christensenellaceae;__;__	Firmicutes	Clostridia	Christensenellales	Christensenellaceae
1e599e3dbd6ab96cab67cd64c1900ccb	486	Bacteria;Firmicutes;Clostridia;Lachnospirales;Lachnospiraceae;Lachnospiraceae_UCG-001;uncultured_bacterium	Firmicutes	Clostridia	Lachnospirales	Lachnospiraceae	Lachnospiraceae_UCG-001	uncultured_bacterium
1e5a3c34e71e582f0b6fac6c28d98b90	534	Bacteria;Firmicutes;Clostridia;Oscillospirales;Ruminococcaceae;Incertae_Sedis;uncultured_bacterium	Firmicutes	Clostridia	Oscillospirales	Ruminococcaceae	Incertae_Sedis	uncultured_bacterium
1e5a3cade889655234927b0089846279	544	Bacteria;Firmicutes;Clostridia;Oscillospirales;Ruminococcaceae;uncultured;uncultured_bacterium	Firmicutes	Clostridia	Oscillospirales	Ruminococcaceae	uncultured	uncultured_bacterium
1e6c7d421bbd7ae3132aa3652d624e02	482	Bacteria;Firmicutes;Clostridia;Lachnospirales;Lachnospiraceae;Lachnospiraceae_NK4A136_group;uncultured_bacterium	Firmicutes	Clostridia	Lachnospirales	Lachnospiraceae	Lachnospiraceae_NK4A136_group	uncultured_bacterium
1e760a50e08da50e7a0267ac57dcd165	472	Bacteria;Firmicutes;Clostridia;Lachnospirales;Lachnospiraceae;Lachnoclostridium;__	Firmicutes	Clostridia	Lachnospirales	Lachnospiraceae	Lachnoclostridium
1e7c5a5383ebd898dcd65aeb68ac7e11	493	Bacteria;Firmicutes;Clostridia;Lachnospirales;Lachnospiraceae;Roseburia;uncultured_bacterium	Firmicutes	Clostridia	Lachnospirales	Lachnospiraceae	Roseburia	uncultured_bacterium
1e8209258ad327f6e9109823b5b27e6c	498	Bacteria;Firmicutes;Clostridia;Lachnospirales;Lachnospiraceae;__;__	Firmicutes	Clostridia	Lachnospirales	Lachnospiraceae
1e884ff163d052c328c07af169791066	473	Bacteria;Firmicutes;Clostridia;Lachnospirales;Lachnospiraceae;Lachnoclostridium;uncultured_bacterium	Firmicutes	Clostridia	Lachnospirales	Lachnospiraceae	Lachnoclostridium	uncultured_bacterium
1e8b576c9b02790991250831efc07026	538	Bacteria;Firmicutes;Clostridia;Oscillospirales;Ruminococcaceae;Ruminococcus;__	Firmicutes	Clostridia	Oscillospirales	Ruminococcaceae	Ruminococcus
1e8f41172e8d15d15ce302a286649ce8	493	Bacteria;Firmicutes;Clostridia;Lachnospirales;Lachnospiraceae;Roseburia;uncultured_bacterium	Firmicutes	Clostridia	Lachnospirales	Lachnospiraceae	Roseburia	uncultured_bacterium
1ea36cf5e39efd94433e0386f92e59c5	534	Bacteria;Firmicutes;Clostridia;Oscillospirales;Ruminococcaceae;Incertae_Sedis;uncultured_bacterium	Firmicutes	Clostridia	Oscillospirales	Ruminococcaceae	Incertae_Sedis	uncultured_bacterium
1ea6858b7f4d7011e10f630ae55d5ade	397	Bacteria;Firmicutes;Bacilli;Erysipelotrichales;Erysipelotrichaceae;Ileibacterium;__	Firmicutes	Bacilli	Erysipelotrichales	Erysipelotrichaceae	Ileibacterium
1ead69909b7db5bee63c042ff63926e1	482	Bacteria;Firmicutes;Clostridia;Lachnospirales;Lachnospiraceae;Lachnospiraceae_NK4A136_group;uncultured_bacterium	Firmicutes	Clostridia	Lachnospirales	Lachnospiraceae	Lachnospiraceae_NK4A136_group	uncultured_bacterium
1ebb422bee591cfaae3b458de91e0680	516	Bacteria;Firmicutes;Clostridia;Oscillospirales;Oscillospiraceae;UCG-003;uncultured_bacterium	Firmicutes	Clostridia	Oscillospirales	Oscillospiraceae	UCG-003	uncultured_bacterium
1ebceab0a3b7e4a18e914ffb093853a1	375	Bacteria;Desulfobacterota;Desulfovibrionia;Desulfovibrionales;Desulfovibrionaceae;Desulfovibrio;Desulfovibrio_hydrothermalis	Desulfobacterota	Desulfovibrionia	Desulfovibrionales	Desulfovibrionaceae	Desulfovibrio	Desulfovibrio_hydrothermalis
1ec60dfe935e9ce3a792644b0160888b	482	Bacteria;Firmicutes;Clostridia;Lachnospirales;Lachnospiraceae;Lachnospiraceae_NK4A136_group;uncultured_bacterium	Firmicutes	Clostridia	Lachnospirales	Lachnospiraceae	Lachnospiraceae_NK4A136_group	uncultured_bacterium
1ec78cf2c330d5a8e7c5c57640213633	536	Bacteria;Firmicutes;Clostridia;Oscillospirales;Ruminococcaceae;Paludicola;uncultured_bacterium	Firmicutes	Clostridia	Oscillospirales	Ruminococcaceae	Paludicola	uncultured_bacterium
1ece7ebda5e12a49340252a3e5ad2893	377	Bacteria;Desulfobacterota;Desulfovibrionia;Desulfovibrionales;Desulfovibrionaceae;Desulfovibrio;uncultured_bacterium	Desulfobacterota	Desulfovibrionia	Desulfovibrionales	Desulfovibrionaceae	Desulfovibrio	uncultured_bacterium
1ecfa3ce280f8da18f59b568ac60eddc	500	Bacteria;Firmicutes;Clostridia;Lachnospirales;Lachnospiraceae;uncultured;uncultured_bacterium	Firmicutes	Clostridia	Lachnospirales	Lachnospiraceae	uncultured	uncultured_bacterium
1ed890b2f633f59a4b16ee3b34929a0c	438	Bacteria;Firmicutes;Clostridia;Clostridia_vadinBB60_group;Clostridia_vadinBB60_group;Clostridia_vadinBB60_group;uncultured_bacterium	Firmicutes	Clostridia	Clostridia_vadinBB60_group	Clostridia_vadinBB60_group	Clostridia_vadinBB60_group	uncultured_bacterium
1ee34d7b0d8b5f32371945f00baecd04	360	Bacteria;Bacteroidota;Bacteroidia;Bacteroidales;Muribaculaceae;Muribaculaceae;uncultured_bacterium	Bacteroidota	Bacteroidia	Bacteroidales	Muribaculaceae	Muribaculaceae	uncultured_bacterium
1ef86d9fe095fb645ac08d4baebb33c8	482	Bacteria;Firmicutes;Clostridia;Lachnospirales;Lachnospiraceae;Lachnospiraceae_NK4A136_group;uncultured_bacterium	Firmicutes	Clostridia	Lachnospirales	Lachnospiraceae	Lachnospiraceae_NK4A136_group	uncultured_bacterium
1f2486d502dfcda77b259a22dde5d821	360	Bacteria;Bacteroidota;Bacteroidia;Bacteroidales;Muribaculaceae;Muribaculaceae;uncultured_bacterium	Bacteroidota	Bacteroidia	Bacteroidales	Muribaculaceae	Muribaculaceae	uncultured_bacterium
1f3377bd7332686788a453590e3b6d64	360	Bacteria;Bacteroidota;Bacteroidia;Bacteroidales;Muribaculaceae;Muribaculaceae;uncultured_bacterium	Bacteroidota	Bacteroidia	Bacteroidales	Muribaculaceae	Muribaculaceae	uncultured_bacterium
1f396bccb79afdf974bb905f6f934c71	515	Bacteria;Firmicutes;Clostridia;Oscillospirales;Oscillospiraceae;UCG-002;uncultured_bacterium	Firmicutes	Clostridia	Oscillospirales	Oscillospiraceae	UCG-002	uncultured_bacterium
1f3da479b0884d2d6ba72381dd030e21	500	Bacteria;Firmicutes;Clostridia;Lachnospirales;Lachnospiraceae;uncultured;uncultured_bacterium	Firmicutes	Clostridia	Lachnospirales	Lachnospiraceae	uncultured	uncultured_bacterium
1f4e9043d61d4e204ea0bb73170c1378	493	Bacteria;Firmicutes;Clostridia;Lachnospirales;Lachnospiraceae;Roseburia;uncultured_bacterium	Firmicutes	Clostridia	Lachnospirales	Lachnospiraceae	Roseburia	uncultured_bacterium
1f51d7230613a85d3c3daebccc86e99c	521	Bacteria;Firmicutes;Clostridia;Oscillospirales;Oscillospiraceae;__;__	Firmicutes	Clostridia	Oscillospirales	Oscillospiraceae
1f608ca6d61dede25e9c72a80a6436c2	376	Bacteria;Desulfobacterota;Desulfovibrionia;Desulfovibrionales;Desulfovibrionaceae;Desulfovibrio;__	Desulfobacterota	Desulfovibrionia	Desulfovibrionales	Desulfovibrionaceae	Desulfovibrio
1f6975600f66c9dfb414bdaa90ccfa36	463	Bacteria;Firmicutes;Clostridia;Lachnospirales;Lachnospiraceae;Blautia;uncultured_bacterium	Firmicutes	Clostridia	Lachnospirales	Lachnospiraceae	Blautia	uncultured_bacterium
1f7fbdb1df0e578492d1dae6c4a1e2b8	493	Bacteria;Firmicutes;Clostridia;Lachnospirales;Lachnospiraceae;Roseburia;uncultured_bacterium	Firmicutes	Clostridia	Lachnospirales	Lachnospiraceae	Roseburia	uncultured_bacterium
1fa0066f62f6f3657f2b4d357118865c	523	Bacteria;Firmicutes;Clostridia;Oscillospirales;Oscillospiraceae;uncultured;uncultured_bacterium	Firmicutes	Clostridia	Oscillospirales	Oscillospiraceae	uncultured	uncultured_bacterium
1fa6e059eb1bdf6a23cd9cf116414d21	500	Bacteria;Firmicutes;Clostridia;Lachnospirales;Lachnospiraceae;uncultured;uncultured_bacterium	Firmicutes	Clostridia	Lachnospirales	Lachnospiraceae	uncultured	uncultured_bacterium
1fd5f8a4b596309b1c69e42e86b0f9fc	500	Bacteria;Firmicutes;Clostridia;Lachnospirales;Lachnospiraceae;uncultured;uncultured_bacterium	Firmicutes	Clostridia	Lachnospirales	Lachnospiraceae	uncultured	uncultured_bacterium
1fdd2ab3143a666102f4cd8486b54ee1	542	Bacteria;Firmicutes;Clostridia;Oscillospirales;Ruminococcaceae;__;__	Firmicutes	Clostridia	Oscillospirales	Ruminococcaceae
1fddac45f4d2bfbef3f402662226c924	500	Bacteria;Firmicutes;Clostridia;Lachnospirales;Lachnospiraceae;uncultured;uncultured_bacterium	Firmicutes	Clostridia	Lachnospirales	Lachnospiraceae	uncultured	uncultured_bacterium
1fe2f7a5066e217d0bb13ad10bcc1185	482	Bacteria;Firmicutes;Clostridia;Lachnospirales;Lachnospiraceae;Lachnospiraceae_NK4A136_group;uncultured_bacterium	Firmicutes	Clostridia	Lachnospirales	Lachnospiraceae	Lachnospiraceae_NK4A136_group	uncultured_bacterium
1fe733613c9dea673796632f9233581c	523	Bacteria;Firmicutes;Clostridia;Oscillospirales;Oscillospiraceae;uncultured;uncultured_bacterium	Firmicutes	Clostridia	Oscillospirales	Oscillospiraceae	uncultured	uncultured_bacterium
1ff5ea18dcedb2ea2d0b9e413470819c	549	Bacteria;Firmicutes;Clostridia;Peptococcales;Peptococcaceae;uncultured;uncultured_bacterium	Firmicutes	Clostridia	Peptococcales	Peptococcaceae	uncultured	uncultured_bacterium
1ff6880fcc999b4733d1d1cf70bfe142	438	Bacteria;Firmicutes;Clostridia;Clostridia_vadinBB60_group;Clostridia_vadinBB60_group;Clostridia_vadinBB60_group;uncultured_bacterium	Firmicutes	Clostridia	Clostridia_vadinBB60_group	Clostridia_vadinBB60_group	Clostridia_vadinBB60_group	uncultured_bacterium
1ffbe4e6159192b57c0a0cc0a1cd8c61	523	Bacteria;Firmicutes;Clostridia;Oscillospirales;Oscillospiraceae;uncultured;uncultured_bacterium	Firmicutes	Clostridia	Oscillospirales	Oscillospiraceae	uncultured	uncultured_bacterium
200a589e7f863496c08a8fe4206e8c64	360	Bacteria;Bacteroidota;Bacteroidia;Bacteroidales;Muribaculaceae;Muribaculaceae;uncultured_bacterium	Bacteroidota	Bacteroidia	Bacteroidales	Muribaculaceae	Muribaculaceae	uncultured_bacterium
201df4785ef1b6d15c59c8cc91490b25	419	Bacteria;Firmicutes;Bacilli;RF39;RF39;RF39;uncultured_bacterium	Firmicutes	Bacilli	RF39	RF39	RF39	uncultured_bacterium
201f616a07d75afa7e856428045f71d2	498	Bacteria;Firmicutes;Clostridia;Lachnospirales;Lachnospiraceae;__;__	Firmicutes	Clostridia	Lachnospirales	Lachnospiraceae
202b0cf777c2bbef95c269128a6a4723	360	Bacteria;Bacteroidota;Bacteroidia;Bacteroidales;Muribaculaceae;Muribaculaceae;uncultured_bacterium	Bacteroidota	Bacteroidia	Bacteroidales	Muribaculaceae	Muribaculaceae	uncultured_bacterium
202c7fddf0e6465d59c51ff20792f4aa	523	Bacteria;Firmicutes;Clostridia;Oscillospirales;Oscillospiraceae;uncultured;uncultured_bacterium	Firmicutes	Clostridia	Oscillospirales	Oscillospiraceae	uncultured	uncultured_bacterium
2036c1fa20240324410b140795046ceb	509	Bacteria;Firmicutes;Clostridia;Oscillospirales;Oscillospiraceae;Colidextribacter;uncultured_bacterium	Firmicutes	Clostridia	Oscillospirales	Oscillospiraceae	Colidextribacter	uncultured_bacterium
203780c77b4443c642857ed76589336c	498	Bacteria;Firmicutes;Clostridia;Lachnospirales;Lachnospiraceae;__;__	Firmicutes	Clostridia	Lachnospirales	Lachnospiraceae
2038cbb6de8fdc2379397878c7864739	559	Bacteria;Firmicutes;Clostridia;__;__;__;__	Firmicutes	Clostridia
203fa78343fdfe582b5698f8e6b5b7b1	500	Bacteria;Firmicutes;Clostridia;Lachnospirales;Lachnospiraceae;uncultured;uncultured_bacterium	Firmicutes	Clostridia	Lachnospirales	Lachnospiraceae	uncultured	uncultured_bacterium
2041485a5410af6080f068e72835b243	523	Bacteria;Firmicutes;Clostridia;Oscillospirales;Oscillospiraceae;uncultured;uncultured_bacterium	Firmicutes	Clostridia	Oscillospirales	Oscillospiraceae	uncultured	uncultured_bacterium
2047b1ca8bb36aad442fa04c9c06cfba	500	Bacteria;Firmicutes;Clostridia;Lachnospirales;Lachnospiraceae;uncultured;uncultured_bacterium	Firmicutes	Clostridia	Lachnospirales	Lachnospiraceae	uncultured	uncultured_bacterium
2057706d2ffb6a4afbd63609e8b65a51	498	Bacteria;Firmicutes;Clostridia;Lachnospirales;Lachnospiraceae;__;__	Firmicutes	Clostridia	Lachnospirales	Lachnospiraceae
20601f5bac2aeaf4f5cf4e6825f25ace	434	Bacteria;Firmicutes;Clostridia;Clostridia_UCG-014;Clostridia_UCG-014;Clostridia_UCG-014;uncultured_bacterium	Firmicutes	Clostridia	Clostridia_UCG-014	Clostridia_UCG-014	Clostridia_UCG-014	uncultured_bacterium
207c4e7b4d1c673f4de21482b31522c8	419	Bacteria;Firmicutes;Bacilli;RF39;RF39;RF39;uncultured_bacterium	Firmicutes	Bacilli	RF39	RF39	RF39	uncultured_bacterium
20a911e87801ef1c70af71c1d44d88ea	498	Bacteria;Firmicutes;Clostridia;Lachnospirales;Lachnospiraceae;__;__	Firmicutes	Clostridia	Lachnospirales	Lachnospiraceae
20ca49a14f09373f7d683aa0fe3ad6b5	471	Bacteria;Firmicutes;Clostridia;Lachnospirales;Lachnospiraceae;GCA-900066575;uncultured_bacterium	Firmicutes	Clostridia	Lachnospirales	Lachnospiraceae	GCA-900066575	uncultured_bacterium
20d05e6403dbe8907b71d4ce71f3f24b	411	Bacteria;Firmicutes;Bacilli;Lactobacillales;Lactobacillaceae;Lactobacillus;uncultured_bacterium	Firmicutes	Bacilli	Lactobacillales	Lactobacillaceae	Lactobacillus	uncultured_bacterium
20d125c2e7f9b9e162c79e40e7ec7159	364	Bacteria;Bacteroidota;Bacteroidia;Bacteroidales;Rs-E47_termite_group;Rs-E47_termite_group;__	Bacteroidota	Bacteroidia	Bacteroidales	Rs-E47_termite_group	Rs-E47_termite_group
20d4d54308ed43cee50289bcd48d991f	498	Bacteria;Firmicutes;Clostridia;Lachnospirales;Lachnospiraceae;__;__	Firmicutes	Clostridia	Lachnospirales	Lachnospiraceae
210a3ed5f6a38d9798b252418441aa72	523	Bacteria;Firmicutes;Clostridia;Oscillospirales;Oscillospiraceae;uncultured;uncultured_bacterium	Firmicutes	Clostridia	Oscillospirales	Oscillospiraceae	uncultured	uncultured_bacterium
210f59f94cbd61e527f166bbd4feffbb	438	Bacteria;Firmicutes;Clostridia;Clostridia_vadinBB60_group;Clostridia_vadinBB60_group;Clostridia_vadinBB60_group;uncultured_bacterium	Firmicutes	Clostridia	Clostridia_vadinBB60_group	Clostridia_vadinBB60_group	Clostridia_vadinBB60_group	uncultured_bacterium
211030f2341d8a9fb9969ff5b20682cf	482	Bacteria;Firmicutes;Clostridia;Lachnospirales;Lachnospiraceae;Lachnospiraceae_NK4A136_group;uncultured_bacterium	Firmicutes	Clostridia	Lachnospirales	Lachnospiraceae	Lachnospiraceae_NK4A136_group	uncultured_bacterium
214003b5b0a2d228ec49d58fdf9e2d85	438	Bacteria;Firmicutes;Clostridia;Clostridia_vadinBB60_group;Clostridia_vadinBB60_group;Clostridia_vadinBB60_group;uncultured_bacterium	Firmicutes	Clostridia	Clostridia_vadinBB60_group	Clostridia_vadinBB60_group	Clostridia_vadinBB60_group	uncultured_bacterium
21506da6fcf769ac167607dd3ae88756	532	Bacteria;Firmicutes;Clostridia;Oscillospirales;Ruminococcaceae;Fournierella;uncultured_bacterium	Firmicutes	Clostridia	Oscillospirales	Ruminococcaceae	Fournierella	uncultured_bacterium
21687dd12eae6e46213016db602ff925	500	Bacteria;Firmicutes;Clostridia;Lachnospirales;Lachnospiraceae;uncultured;uncultured_bacterium	Firmicutes	Clostridia	Lachnospirales	Lachnospiraceae	uncultured	uncultured_bacterium
216fd5ef2ff917de176c2bc5d817f2c4	471	Bacteria;Firmicutes;Clostridia;Lachnospirales;Lachnospiraceae;GCA-900066575;uncultured_bacterium	Firmicutes	Clostridia	Lachnospirales	Lachnospiraceae	GCA-900066575	uncultured_bacterium
2170e034b138415bf1342fbbb7fe42c6	482	Bacteria;Firmicutes;Clostridia;Lachnospirales;Lachnospiraceae;Lachnospiraceae_NK4A136_group;uncultured_bacterium	Firmicutes	Clostridia	Lachnospirales	Lachnospiraceae	Lachnospiraceae_NK4A136_group	uncultured_bacterium
2186d9339087228463dd33b77e290731	497	Bacteria;Firmicutes;Clostridia;Lachnospirales;Lachnospiraceae;Tyzzerella;uncultured_rumen	Firmicutes	Clostridia	Lachnospirales	Lachnospiraceae	Tyzzerella	uncultured_rumen
218d50b13228d6da982143e674ec5cff	422	Bacteria;Firmicutes;Bacilli;Staphylococcales;Staphylococcaceae;Jeotgalicoccus;uncultured_bacterium	Firmicutes	Bacilli	Staphylococcales	Staphylococcaceae	Jeotgalicoccus	uncultured_bacterium
2192f0b8a18c98e8eba2f8352032a23e	360	Bacteria;Bacteroidota;Bacteroidia;Bacteroidales;Muribaculaceae;Muribaculaceae;uncultured_bacterium	Bacteroidota	Bacteroidia	Bacteroidales	Muribaculaceae	Muribaculaceae	uncultured_bacterium
21950e3fb722409e8e871701930d994c	360	Bacteria;Bacteroidota;Bacteroidia;Bacteroidales;Muribaculaceae;Muribaculaceae;uncultured_bacterium	Bacteroidota	Bacteroidia	Bacteroidales	Muribaculaceae	Muribaculaceae	uncultured_bacterium
219f73a57fcf18621358945b33e0f4f0	438	Bacteria;Firmicutes;Clostridia;Clostridia_vadinBB60_group;Clostridia_vadinBB60_group;Clostridia_vadinBB60_group;uncultured_bacterium	Firmicutes	Clostridia	Clostridia_vadinBB60_group	Clostridia_vadinBB60_group	Clostridia_vadinBB60_group	uncultured_bacterium
21a17dc8cde85d17746086a798d55800	505	Bacteria;Firmicutes;Clostridia;Oscillospirales;Butyricicoccaceae;Butyricicoccus;uncultured_bacterium	Firmicutes	Clostridia	Oscillospirales	Butyricicoccaceae	Butyricicoccus	uncultured_bacterium
21a53a525cc03c9175b1e81e5a1c3049	523	Bacteria;Firmicutes;Clostridia;Oscillospirales;Oscillospiraceae;uncultured;uncultured_bacterium	Firmicutes	Clostridia	Oscillospirales	Oscillospiraceae	uncultured	uncultured_bacterium
21b297bd4014e2c29e151e602e212702	523	Bacteria;Firmicutes;Clostridia;Oscillospirales;Oscillospiraceae;uncultured;uncultured_bacterium	Firmicutes	Clostridia	Oscillospirales	Oscillospiraceae	uncultured	uncultured_bacterium
21bb78ba652506dc20f6edf5ef626c46	360	Bacteria;Bacteroidota;Bacteroidia;Bacteroidales;Muribaculaceae;Muribaculaceae;uncultured_bacterium	Bacteroidota	Bacteroidia	Bacteroidales	Muribaculaceae	Muribaculaceae	uncultured_bacterium
21be19b38d925dedbf628630c41878d9	500	Bacteria;Firmicutes;Clostridia;Lachnospirales;Lachnospiraceae;uncultured;uncultured_bacterium	Firmicutes	Clostridia	Lachnospirales	Lachnospiraceae	uncultured	uncultured_bacterium
21c6bbbaf3ba5d2e5782876341cf1b66	493	Bacteria;Firmicutes;Clostridia;Lachnospirales;Lachnospiraceae;Roseburia;uncultured_bacterium	Firmicutes	Clostridia	Lachnospirales	Lachnospiraceae	Roseburia	uncultured_bacterium
21ec41d9989437e9e4448089cb50fb64	482	Bacteria;Firmicutes;Clostridia;Lachnospirales;Lachnospiraceae;Lachnospiraceae_NK4A136_group;uncultured_bacterium	Firmicutes	Clostridia	Lachnospirales	Lachnospiraceae	Lachnospiraceae_NK4A136_group	uncultured_bacterium
21ec7c08c60bfcd2e777cc645f7f4ac7	581	Bacteria;Proteobacteria;Gammaproteobacteria;Enterobacterales;Enterobacteriaceae;Enterobacter;__	Proteobacteria	Gammaproteobacteria	Enterobacterales	Enterobacteriaceae	Enterobacter
21f03873e4fcb1e0bc38aaf69807ff4a	493	Bacteria;Firmicutes;Clostridia;Lachnospirales;Lachnospiraceae;Roseburia;uncultured_bacterium	Firmicutes	Clostridia	Lachnospirales	Lachnospiraceae	Roseburia	uncultured_bacterium
2211a4d287b90862fe2298ebd3c28855	472	Bacteria;Firmicutes;Clostridia;Lachnospirales;Lachnospiraceae;Lachnoclostridium;__	Firmicutes	Clostridia	Lachnospirales	Lachnospiraceae	Lachnoclostridium
22120b2d61727eb68a610abe250c510b	360	Bacteria;Bacteroidota;Bacteroidia;Bacteroidales;Muribaculaceae;Muribaculaceae;uncultured_bacterium	Bacteroidota	Bacteroidia	Bacteroidales	Muribaculaceae	Muribaculaceae	uncultured_bacterium
221f638f30d9f6c244d8907374aacbe0	411	Bacteria;Firmicutes;Bacilli;Lactobacillales;Lactobacillaceae;Lactobacillus;uncultured_bacterium	Firmicutes	Bacilli	Lactobacillales	Lactobacillaceae	Lactobacillus	uncultured_bacterium
2239d79ebfc54a3fd433058f89dbc747	360	Bacteria;Bacteroidota;Bacteroidia;Bacteroidales;Muribaculaceae;Muribaculaceae;uncultured_bacterium	Bacteroidota	Bacteroidia	Bacteroidales	Muribaculaceae	Muribaculaceae	uncultured_bacterium
224183355b6af032c3d45b9a83c9ad4f	360	Bacteria;Bacteroidota;Bacteroidia;Bacteroidales;Muribaculaceae;Muribaculaceae;uncultured_bacterium	Bacteroidota	Bacteroidia	Bacteroidales	Muribaculaceae	Muribaculaceae	uncultured_bacterium
2251531fb50a8b8c6f8b614a0a4d40a0	505	Bacteria;Firmicutes;Clostridia;Oscillospirales;Butyricicoccaceae;Butyricicoccus;uncultured_bacterium	Firmicutes	Clostridia	Oscillospirales	Butyricicoccaceae	Butyricicoccus	uncultured_bacterium
2258fdba3ac0aec4de588d0ce3ff3f25	500	Bacteria;Firmicutes;Clostridia;Lachnospirales;Lachnospiraceae;uncultured;uncultured_bacterium	Firmicutes	Clostridia	Lachnospirales	Lachnospiraceae	uncultured	uncultured_bacterium
2261e7cfa8aa481a766c591695ad9b43	484	Bacteria;Firmicutes;Clostridia;Lachnospirales;Lachnospiraceae;Lachnospiraceae_NK4B4_group;uncultured_bacterium	Firmicutes	Clostridia	Lachnospirales	Lachnospiraceae	Lachnospiraceae_NK4B4_group	uncultured_bacterium
226f0c238fac90dafe45fd49e457f53e	471	Bacteria;Firmicutes;Clostridia;Lachnospirales;Lachnospiraceae;GCA-900066575;uncultured_bacterium	Firmicutes	Clostridia	Lachnospirales	Lachnospiraceae	GCA-900066575	uncultured_bacterium
226ff4849d0c5ff468c51716cf283139	523	Bacteria;Firmicutes;Clostridia;Oscillospirales;Oscillospiraceae;uncultured;uncultured_bacterium	Firmicutes	Clostridia	Oscillospirales	Oscillospiraceae	uncultured	uncultured_bacterium
227209f9e7c135ec701f860bf7ce890b	360	Bacteria;Bacteroidota;Bacteroidia;Bacteroidales;Muribaculaceae;Muribaculaceae;uncultured_bacterium	Bacteroidota	Bacteroidia	Bacteroidales	Muribaculaceae	Muribaculaceae	uncultured_bacterium
227b2612a3bb0a5322c2c482320ec97c	557	Bacteria;Firmicutes;Clostridia;Peptostreptococcales-Tissierellales;Anaerovoracaceae;__;__	Firmicutes	Clostridia	Peptostreptococcales-Tissierellales	Anaerovoracaceae
228005b739b58f79aa7b9a3b1aeee49a	376	Bacteria;Desulfobacterota;Desulfovibrionia;Desulfovibrionales;Desulfovibrionaceae;Desulfovibrio;__	Desulfobacterota	Desulfovibrionia	Desulfovibrionales	Desulfovibrionaceae	Desulfovibrio
2287fc767b61d032cbcca0b4447e2cc5	500	Bacteria;Firmicutes;Clostridia;Lachnospirales;Lachnospiraceae;uncultured;uncultured_bacterium	Firmicutes	Clostridia	Lachnospirales	Lachnospiraceae	uncultured	uncultured_bacterium
22b6b014e7ce5c16ed026f5828f3eece	493	Bacteria;Firmicutes;Clostridia;Lachnospirales;Lachnospiraceae;Roseburia;uncultured_bacterium	Firmicutes	Clostridia	Lachnospirales	Lachnospiraceae	Roseburia	uncultured_bacterium
22ba87f0f5ed008f69bca6ce68b8e831	523	Bacteria;Firmicutes;Clostridia;Oscillospirales;Oscillospiraceae;uncultured;uncultured_bacterium	Firmicutes	Clostridia	Oscillospirales	Oscillospiraceae	uncultured	uncultured_bacterium
22baccbd59f34516eea8bf3c6c438519	382	Bacteria;Firmicutes;Bacilli;Acholeplasmatales;Acholeplasmataceae;Anaeroplasma;uncultured_bacterium	Firmicutes	Bacilli	Acholeplasmatales	Acholeplasmataceae	Anaeroplasma	uncultured_bacterium
22d8a49d6a271549f293a4be15079c19	500	Bacteria;Firmicutes;Clostridia;Lachnospirales;Lachnospiraceae;uncultured;uncultured_bacterium	Firmicutes	Clostridia	Lachnospirales	Lachnospiraceae	uncultured	uncultured_bacterium
22ee602123eef786a309cc9dca6e5c65	482	Bacteria;Firmicutes;Clostridia;Lachnospirales;Lachnospiraceae;Lachnospiraceae_NK4A136_group;uncultured_bacterium	Firmicutes	Clostridia	Lachnospirales	Lachnospiraceae	Lachnospiraceae_NK4A136_group	uncultured_bacterium
22f67c95dee2fee8839b6ca4e75c04ce	555	Bacteria;Firmicutes;Clostridia;Peptostreptococcales-Tissierellales;Anaerovoracaceae;Family_XIII_AD3011_group;uncultured_bacterium	Firmicutes	Clostridia	Peptostreptococcales-Tissierellales	Anaerovoracaceae	Family_XIII_AD3011_group	uncultured_bacterium
232510ae4ed09c850e3fb63d9bc09d72	482	Bacteria;Firmicutes;Clostridia;Lachnospirales;Lachnospiraceae;Lachnospiraceae_NK4A136_group;uncultured_bacterium	Firmicutes	Clostridia	Lachnospirales	Lachnospiraceae	Lachnospiraceae_NK4A136_group	uncultured_bacterium
232c3073f7894e7028b6f0c08a95828c	482	Bacteria;Firmicutes;Clostridia;Lachnospirales;Lachnospiraceae;Lachnospiraceae_NK4A136_group;uncultured_bacterium	Firmicutes	Clostridia	Lachnospirales	Lachnospiraceae	Lachnospiraceae_NK4A136_group	uncultured_bacterium
233e1b48fe1023887b10b772f889ef95	523	Bacteria;Firmicutes;Clostridia;Oscillospirales;Oscillospiraceae;uncultured;uncultured_bacterium	Firmicutes	Clostridia	Oscillospirales	Oscillospiraceae	uncultured	uncultured_bacterium
233e227a5468b8b9faefddaa244c53d5	463	Bacteria;Firmicutes;Clostridia;Lachnospirales;Lachnospiraceae;Blautia;uncultured_bacterium	Firmicutes	Clostridia	Lachnospirales	Lachnospiraceae	Blautia	uncultured_bacterium
233e5f1bdebf61aa43a0f88bdeb7b613	438	Bacteria;Firmicutes;Clostridia;Clostridia_vadinBB60_group;Clostridia_vadinBB60_group;Clostridia_vadinBB60_group;uncultured_bacterium	Firmicutes	Clostridia	Clostridia_vadinBB60_group	Clostridia_vadinBB60_group	Clostridia_vadinBB60_group	uncultured_bacterium
234075764371600adc33a78a442bbb13	500	Bacteria;Firmicutes;Clostridia;Lachnospirales;Lachnospiraceae;uncultured;uncultured_bacterium	Firmicutes	Clostridia	Lachnospirales	Lachnospiraceae	uncultured	uncultured_bacterium
2343f0d6b053dba25896cdecf0a3389a	360	Bacteria;Bacteroidota;Bacteroidia;Bacteroidales;Muribaculaceae;Muribaculaceae;uncultured_bacterium	Bacteroidota	Bacteroidia	Bacteroidales	Muribaculaceae	Muribaculaceae	uncultured_bacterium
234b413532612196e0ce44fc5777c918	500	Bacteria;Firmicutes;Clostridia;Lachnospirales;Lachnospiraceae;uncultured;uncultured_bacterium	Firmicutes	Clostridia	Lachnospirales	Lachnospiraceae	uncultured	uncultured_bacterium
235a3631d1cc01de1de9aa6fc9025300	554	Bacteria;Firmicutes;Clostridia;Peptostreptococcales-Tissierellales;Anaerovoracaceae;Family_XIII_AD3011_group;__	Firmicutes	Clostridia	Peptostreptococcales-Tissierellales	Anaerovoracaceae	Family_XIII_AD3011_group
235b81051afbf1b5b356b06eee24a909	516	Bacteria;Firmicutes;Clostridia;Oscillospirales;Oscillospiraceae;UCG-003;uncultured_bacterium	Firmicutes	Clostridia	Oscillospirales	Oscillospiraceae	UCG-003	uncultured_bacterium
236df7177446f338b2cb420e1084a507	540	Bacteria;Firmicutes;Clostridia;Oscillospirales;Ruminococcaceae;UBA1819;__	Firmicutes	Clostridia	Oscillospirales	Ruminococcaceae	UBA1819
238d8441ca84fe68b544d3b535063188	491	Bacteria;Firmicutes;Clostridia;Lachnospirales;Lachnospiraceae;Oribacterium;__	Firmicutes	Clostridia	Lachnospirales	Lachnospiraceae	Oribacterium
239188943a10c53084f798449cf35c35	523	Bacteria;Firmicutes;Clostridia;Oscillospirales;Oscillospiraceae;uncultured;uncultured_bacterium	Firmicutes	Clostridia	Oscillospirales	Oscillospiraceae	uncultured	uncultured_bacterium
2396d8c2cf1388c2dfb49cfdb79f8b47	372	Bacteria;Deferribacterota;Deferribacteres;Deferribacterales;Deferribacteraceae;Mucispirillum;uncultured_bacterium	Deferribacterota	Deferribacteres	Deferribacterales	Deferribacteraceae	Mucispirillum	uncultured_bacterium
239ee496e3252a66e9c2786f92e05831	504	Bacteria;Firmicutes;Clostridia;Oscillospirales;[Eubacterium]_coprostanoligenes_group;[Eubacterium]_coprostanoligenes_group;uncultured_bacterium	Firmicutes	Clostridia	Oscillospirales	[Eubacterium]_coprostanoligenes_group	[Eubacterium]_coprostanoligenes_group	uncultured_bacterium
23c5fda4f947d8fae09636bfb0138cf1	523	Bacteria;Firmicutes;Clostridia;Oscillospirales;Oscillospiraceae;uncultured;uncultured_bacterium	Firmicutes	Clostridia	Oscillospirales	Oscillospiraceae	uncultured	uncultured_bacterium
23d21bee88fbc146d5e7ee1e9b9b9874	523	Bacteria;Firmicutes;Clostridia;Oscillospirales;Oscillospiraceae;uncultured;uncultured_bacterium	Firmicutes	Clostridia	Oscillospirales	Oscillospiraceae	uncultured	uncultured_bacterium
23d3a1708bba5fcc4ae34dc920923337	507	Bacteria;Firmicutes;Clostridia;Oscillospirales;Butyricicoccaceae;UCG-009;uncultured_bacterium	Firmicutes	Clostridia	Oscillospirales	Butyricicoccaceae	UCG-009	uncultured_bacterium
23e9c6aa92d4b5bed190230df141630c	504	Bacteria;Firmicutes;Clostridia;Oscillospirales;[Eubacterium]_coprostanoligenes_group;[Eubacterium]_coprostanoligenes_group;uncultured_bacterium	Firmicutes	Clostridia	Oscillospirales	[Eubacterium]_coprostanoligenes_group	[Eubacterium]_coprostanoligenes_group	uncultured_bacterium
23ec7b58808555e7e3ab74dd634d9375	500	Bacteria;Firmicutes;Clostridia;Lachnospirales;Lachnospiraceae;uncultured;uncultured_bacterium	Firmicutes	Clostridia	Lachnospirales	Lachnospiraceae	uncultured	uncultured_bacterium
240d091339172a593fb7af2941d9d1c8	493	Bacteria;Firmicutes;Clostridia;Lachnospirales;Lachnospiraceae;Roseburia;uncultured_bacterium	Firmicutes	Clostridia	Lachnospirales	Lachnospiraceae	Roseburia	uncultured_bacterium
2420f809fd5ed4b466be703a31349ae0	500	Bacteria;Firmicutes;Clostridia;Lachnospirales;Lachnospiraceae;uncultured;uncultured_bacterium	Firmicutes	Clostridia	Lachnospirales	Lachnospiraceae	uncultured	uncultured_bacterium
2433e11ac325ac7967a052851c3db0fc	369	Bacteria;Cyanobacteria;Vampirivibrionia;Gastranaerophilales;Gastranaerophilales;Gastranaerophilales;uncultured_bacterium	Cyanobacteria	Vampirivibrionia	Gastranaerophilales	Gastranaerophilales	Gastranaerophilales	uncultured_bacterium
244e266aa40fef471b21c3e96ab82db2	493	Bacteria;Firmicutes;Clostridia;Lachnospirales;Lachnospiraceae;Roseburia;uncultured_bacterium	Firmicutes	Clostridia	Lachnospirales	Lachnospiraceae	Roseburia	uncultured_bacterium
2455281e738f5078e720a424d3662424	500	Bacteria;Firmicutes;Clostridia;Lachnospirales;Lachnospiraceae;uncultured;uncultured_bacterium	Firmicutes	Clostridia	Lachnospirales	Lachnospiraceae	uncultured	uncultured_bacterium
24553d930dc604f4c165171ba3f18345	368	Bacteria;Cyanobacteria;Vampirivibrionia;Gastranaerophilales;Gastranaerophilales;Gastranaerophilales;__	Cyanobacteria	Vampirivibrionia	Gastranaerophilales	Gastranaerophilales	Gastranaerophilales
246bd249f001b0d1eb849cf5bb8869f9	523	Bacteria;Firmicutes;Clostridia;Oscillospirales;Oscillospiraceae;uncultured;uncultured_bacterium	Firmicutes	Clostridia	Oscillospirales	Oscillospiraceae	uncultured	uncultured_bacterium
248a046715486a85925ff4d672c4bf07	544	Bacteria;Firmicutes;Clostridia;Oscillospirales;Ruminococcaceae;uncultured;uncultured_bacterium	Firmicutes	Clostridia	Oscillospirales	Ruminococcaceae	uncultured	uncultured_bacterium
24a1ea3cbd32f3b8433f30b24bb9d828	500	Bacteria;Firmicutes;Clostridia;Lachnospirales;Lachnospiraceae;uncultured;uncultured_bacterium	Firmicutes	Clostridia	Lachnospirales	Lachnospiraceae	uncultured	uncultured_bacterium
24a9ba3aeed9130f86aa45a569c5945a	410	Bacteria;Firmicutes;Bacilli;Lactobacillales;Lactobacillaceae;Lactobacillus;__	Firmicutes	Bacilli	Lactobacillales	Lactobacillaceae	Lactobacillus
24aadee1d18b91b6ed901b6f02069634	482	Bacteria;Firmicutes;Clostridia;Lachnospirales;Lachnospiraceae;Lachnospiraceae_NK4A136_group;uncultured_bacterium	Firmicutes	Clostridia	Lachnospirales	Lachnospiraceae	Lachnospiraceae_NK4A136_group	uncultured_bacterium
24b2a0f76f1bac4ec748ed3b84b85fd6	360	Bacteria;Bacteroidota;Bacteroidia;Bacteroidales;Muribaculaceae;Muribaculaceae;uncultured_bacterium	Bacteroidota	Bacteroidia	Bacteroidales	Muribaculaceae	Muribaculaceae	uncultured_bacterium
24b4be02fed46a20356ce71c7f656bc7	544	Bacteria;Firmicutes;Clostridia;Oscillospirales;Ruminococcaceae;uncultured;uncultured_bacterium	Firmicutes	Clostridia	Oscillospirales	Ruminococcaceae	uncultured	uncultured_bacterium
24be3ba911b072d4042c8f7a614315c4	521	Bacteria;Firmicutes;Clostridia;Oscillospirales;Oscillospiraceae;__;__	Firmicutes	Clostridia	Oscillospirales	Oscillospiraceae
24beaeaba8ddb868ef5ba540d4459879	503	Bacteria;Firmicutes;Clostridia;Oscillospirales;[Clostridium]_methylpentosum_group;[Clostridium]_methylpentosum_group;__	Firmicutes	Clostridia	Oscillospirales	[Clostridium]_methylpentosum_group	[Clostridium]_methylpentosum_group
24bf66ff67016ebe9a7b66887a7b4784	523	Bacteria;Firmicutes;Clostridia;Oscillospirales;Oscillospiraceae;uncultured;uncultured_bacterium	Firmicutes	Clostridia	Oscillospirales	Oscillospiraceae	uncultured	uncultured_bacterium
24d3b0c9a18d83865829d501e617e395	523	Bacteria;Firmicutes;Clostridia;Oscillospirales;Oscillospiraceae;uncultured;uncultured_bacterium	Firmicutes	Clostridia	Oscillospirales	Oscillospiraceae	uncultured	uncultured_bacterium
24ea40a19b9a90864ff367464a9ac31d	360	Bacteria;Bacteroidota;Bacteroidia;Bacteroidales;Muribaculaceae;Muribaculaceae;uncultured_bacterium	Bacteroidota	Bacteroidia	Bacteroidales	Muribaculaceae	Muribaculaceae	uncultured_bacterium
24fcb25a5319f6fff1e69a270cef7f9d	509	Bacteria;Firmicutes;Clostridia;Oscillospirales;Oscillospiraceae;Colidextribacter;uncultured_bacterium	Firmicutes	Clostridia	Oscillospirales	Oscillospiraceae	Colidextribacter	uncultured_bacterium
25003211b5c60a9c73e4dfc2d2732399	569	Bacteria;Proteobacteria;Alphaproteobacteria;Paracaedibacterales;Paracaedibacteraceae;uncultured;uncultured_bacterium	Proteobacteria	Alphaproteobacteria	Paracaedibacterales	Paracaedibacteraceae	uncultured	uncultured_bacterium
250a6b4ff6a51e5bc9b900a2227cbd5b	521	Bacteria;Firmicutes;Clostridia;Oscillospirales;Oscillospiraceae;__;__	Firmicutes	Clostridia	Oscillospirales	Oscillospiraceae
251db781273c8f0581505210e981b4d0	368	Bacteria;Cyanobacteria;Vampirivibrionia;Gastranaerophilales;Gastranaerophilales;Gastranaerophilales;__	Cyanobacteria	Vampirivibrionia	Gastranaerophilales	Gastranaerophilales	Gastranaerophilales
254198a6e2e34a25e1d4bbc3022c8ea0	498	Bacteria;Firmicutes;Clostridia;Lachnospirales;Lachnospiraceae;__;__	Firmicutes	Clostridia	Lachnospirales	Lachnospiraceae
256a79a63a0363b577ce341ccbc8d791	363	Bacteria;Bacteroidota;Bacteroidia;Bacteroidales;Rikenellaceae;Rikenella;__	Bacteroidota	Bacteroidia	Bacteroidales	Rikenellaceae	Rikenella
256abe3da24e422a2da4b81b595aac42	438	Bacteria;Firmicutes;Clostridia;Clostridia_vadinBB60_group;Clostridia_vadinBB60_group;Clostridia_vadinBB60_group;uncultured_bacterium	Firmicutes	Clostridia	Clostridia_vadinBB60_group	Clostridia_vadinBB60_group	Clostridia_vadinBB60_group	uncultured_bacterium
256e0eb2f5e5c9c8f0777db4a7c8a81a	360	Bacteria;Bacteroidota;Bacteroidia;Bacteroidales;Muribaculaceae;Muribaculaceae;uncultured_bacterium	Bacteroidota	Bacteroidia	Bacteroidales	Muribaculaceae	Muribaculaceae	uncultured_bacterium
256f8a529c7e5bf394e77eed85d3d3ec	450	Bacteria;Firmicutes;Clostridia;Lachnospirales;Lachnospiraceae;[Ruminococcus]_torques_group;uncultured_bacterium	Firmicutes	Clostridia	Lachnospirales	Lachnospiraceae	[Ruminococcus]_torques_group	uncultured_bacterium
257b196e4858bd08ceb187d4657efa24	523	Bacteria;Firmicutes;Clostridia;Oscillospirales;Oscillospiraceae;uncultured;uncultured_bacterium	Firmicutes	Clostridia	Oscillospirales	Oscillospiraceae	uncultured	uncultured_bacterium
257d4a8eb762282ee98386c66483344d	509	Bacteria;Firmicutes;Clostridia;Oscillospirales;Oscillospiraceae;Colidextribacter;uncultured_bacterium	Firmicutes	Clostridia	Oscillospirales	Oscillospiraceae	Colidextribacter	uncultured_bacterium
257db093455aae670834f14b0eab2df2	434	Bacteria;Firmicutes;Clostridia;Clostridia_UCG-014;Clostridia_UCG-014;Clostridia_UCG-014;uncultured_bacterium	Firmicutes	Clostridia	Clostridia_UCG-014	Clostridia_UCG-014	Clostridia_UCG-014	uncultured_bacterium
2580782323bb65a0639cf35e63e0fa5c	419	Bacteria;Firmicutes;Bacilli;RF39;RF39;RF39;uncultured_bacterium	Firmicutes	Bacilli	RF39	RF39	RF39	uncultured_bacterium
259ce298d35616dbcbb592c292afeb05	438	Bacteria;Firmicutes;Clostridia;Clostridia_vadinBB60_group;Clostridia_vadinBB60_group;Clostridia_vadinBB60_group;uncultured_bacterium	Firmicutes	Clostridia	Clostridia_vadinBB60_group	Clostridia_vadinBB60_group	Clostridia_vadinBB60_group	uncultured_bacterium
259eb8945876449e7fbaf557a6b8026b	498	Bacteria;Firmicutes;Clostridia;Lachnospirales;Lachnospiraceae;__;__	Firmicutes	Clostridia	Lachnospirales	Lachnospiraceae
25c2c8262d88f15a4a818ea535d8e2ee	438	Bacteria;Firmicutes;Clostridia;Clostridia_vadinBB60_group;Clostridia_vadinBB60_group;Clostridia_vadinBB60_group;uncultured_bacterium	Firmicutes	Clostridia	Clostridia_vadinBB60_group	Clostridia_vadinBB60_group	Clostridia_vadinBB60_group	uncultured_bacterium
25c57c10e828d55535eb881e3835551f	498	Bacteria;Firmicutes;Clostridia;Lachnospirales;Lachnospiraceae;__;__	Firmicutes	Clostridia	Lachnospirales	Lachnospiraceae
25c8ddbd2922867f3970c2e87802b554	523	Bacteria;Firmicutes;Clostridia;Oscillospirales;Oscillospiraceae;uncultured;uncultured_bacterium	Firmicutes	Clostridia	Oscillospirales	Oscillospiraceae	uncultured	uncultured_bacterium
25d6e4d2241f730006558d29a11d6261	438	Bacteria;Firmicutes;Clostridia;Clostridia_vadinBB60_group;Clostridia_vadinBB60_group;Clostridia_vadinBB60_group;uncultured_bacterium	Firmicutes	Clostridia	Clostridia_vadinBB60_group	Clostridia_vadinBB60_group	Clostridia_vadinBB60_group	uncultured_bacterium
25e1f44ff6cb51584dcf73aee62847da	360	Bacteria;Bacteroidota;Bacteroidia;Bacteroidales;Muribaculaceae;Muribaculaceae;uncultured_bacterium	Bacteroidota	Bacteroidia	Bacteroidales	Muribaculaceae	Muribaculaceae	uncultured_bacterium
25e61fc5f28ff87d24c77960a049fe74	456	Bacteria;Firmicutes;Clostridia;Lachnospirales;Lachnospiraceae;Acetitomaculum;uncultured_bacterium	Firmicutes	Clostridia	Lachnospirales	Lachnospiraceae	Acetitomaculum	uncultured_bacterium
25fda320be0e36cf1022e3cc461504df	371	Bacteria;Deferribacterota;Deferribacteres;Deferribacterales;Deferribacteraceae;Mucispirillum;__	Deferribacterota	Deferribacteres	Deferribacterales	Deferribacteraceae	Mucispirillum
25fe62c113290941fb8bf3925b7f13f4	463	Bacteria;Firmicutes;Clostridia;Lachnospirales;Lachnospiraceae;Blautia;uncultured_bacterium	Firmicutes	Clostridia	Lachnospirales	Lachnospiraceae	Blautia	uncultured_bacterium
2607a0b8a885c3a139b8ddca98f38375	364	Bacteria;Bacteroidota;Bacteroidia;Bacteroidales;Rs-E47_termite_group;Rs-E47_termite_group;__	Bacteroidota	Bacteroidia	Bacteroidales	Rs-E47_termite_group	Rs-E47_termite_group
260a6b0fc369b7ccdfd0a33b3a83aa27	438	Bacteria;Firmicutes;Clostridia;Clostridia_vadinBB60_group;Clostridia_vadinBB60_group;Clostridia_vadinBB60_group;uncultured_bacterium	Firmicutes	Clostridia	Clostridia_vadinBB60_group	Clostridia_vadinBB60_group	Clostridia_vadinBB60_group	uncultured_bacterium
261d8e48b6e20daceed154374c3fe858	523	Bacteria;Firmicutes;Clostridia;Oscillospirales;Oscillospiraceae;uncultured;uncultured_bacterium	Firmicutes	Clostridia	Oscillospirales	Oscillospiraceae	uncultured	uncultured_bacterium
2626711ba9dc16d01ae158bd4d66d94b	372	Bacteria;Deferribacterota;Deferribacteres;Deferribacterales;Deferribacteraceae;Mucispirillum;uncultured_bacterium	Deferribacterota	Deferribacteres	Deferribacterales	Deferribacteraceae	Mucispirillum	uncultured_bacterium
26278ffda0eb1002be735609cbecaf8a	438	Bacteria;Firmicutes;Clostridia;Clostridia_vadinBB60_group;Clostridia_vadinBB60_group;Clostridia_vadinBB60_group;uncultured_bacterium	Firmicutes	Clostridia	Clostridia_vadinBB60_group	Clostridia_vadinBB60_group	Clostridia_vadinBB60_group	uncultured_bacterium
264356ea198728b2c6fd49fb6d25b633	500	Bacteria;Firmicutes;Clostridia;Lachnospirales;Lachnospiraceae;uncultured;uncultured_bacterium	Firmicutes	Clostridia	Lachnospirales	Lachnospiraceae	uncultured	uncultured_bacterium
264472f152a957e560c401f63b623d1f	534	Bacteria;Firmicutes;Clostridia;Oscillospirales;Ruminococcaceae;Incertae_Sedis;uncultured_bacterium	Firmicutes	Clostridia	Oscillospirales	Ruminococcaceae	Incertae_Sedis	uncultured_bacterium
2647b60812be45e0e8142736bd073b41	523	Bacteria;Firmicutes;Clostridia;Oscillospirales;Oscillospiraceae;uncultured;uncultured_bacterium	Firmicutes	Clostridia	Oscillospirales	Oscillospiraceae	uncultured	uncultured_bacterium
26626b10c564ef5710908d522dc868a7	523	Bacteria;Firmicutes;Clostridia;Oscillospirales;Oscillospiraceae;uncultured;uncultured_bacterium	Firmicutes	Clostridia	Oscillospirales	Oscillospiraceae	uncultured	uncultured_bacterium
266475842763efe2949f7ecb9ffa9119	492	Bacteria;Firmicutes;Clostridia;Lachnospirales;Lachnospiraceae;Roseburia;__	Firmicutes	Clostridia	Lachnospirales	Lachnospiraceae	Roseburia
2671993da3e8f5ce4aad31b0f05a790d	360	Bacteria;Bacteroidota;Bacteroidia;Bacteroidales;Muribaculaceae;Muribaculaceae;uncultured_bacterium	Bacteroidota	Bacteroidia	Bacteroidales	Muribaculaceae	Muribaculaceae	uncultured_bacterium
2673c1deda0b9f3914da70090925d96d	360	Bacteria;Bacteroidota;Bacteroidia;Bacteroidales;Muribaculaceae;Muribaculaceae;uncultured_bacterium	Bacteroidota	Bacteroidia	Bacteroidales	Muribaculaceae	Muribaculaceae	uncultured_bacterium
2681872003b69d41186b402afd3ac7e4	474	Bacteria;Firmicutes;Clostridia;Lachnospirales;Lachnospiraceae;Lachnoclostridium;uncultured_organism	Firmicutes	Clostridia	Lachnospirales	Lachnospiraceae	Lachnoclostridium	uncultured_organism
2686f79f1e526083618e981c10aa8947	479	Bacteria;Firmicutes;Clostridia;Lachnospirales;Lachnospiraceae;Lachnospiraceae_FCS020_group;uncultured_bacterium	Firmicutes	Clostridia	Lachnospirales	Lachnospiraceae	Lachnospiraceae_FCS020_group	uncultured_bacterium
269213f973437393107aea10152de2b2	523	Bacteria;Firmicutes;Clostridia;Oscillospirales;Oscillospiraceae;uncultured;uncultured_bacterium	Firmicutes	Clostridia	Oscillospirales	Oscillospiraceae	uncultured	uncultured_bacterium
26968affd9ab8b20abf9a29fd99d6704	340	Bacteria;Actinobacteriota;Actinobacteria;Corynebacteriales;Corynebacteriaceae;Corynebacterium;__	Actinobacteriota	Actinobacteria	Corynebacteriales	Corynebacteriaceae	Corynebacterium
2696b9a5068cbd4e90fb9ec883d5a114	523	Bacteria;Firmicutes;Clostridia;Oscillospirales;Oscillospiraceae;uncultured;uncultured_bacterium	Firmicutes	Clostridia	Oscillospirales	Oscillospiraceae	uncultured	uncultured_bacterium
26a797d88f78f1c35de7b7fc58a38684	498	Bacteria;Firmicutes;Clostridia;Lachnospirales;Lachnospiraceae;__;__	Firmicutes	Clostridia	Lachnospirales	Lachnospiraceae
26be7e0cd0e1c275c074aa6ac9b223b7	500	Bacteria;Firmicutes;Clostridia;Lachnospirales;Lachnospiraceae;uncultured;uncultured_bacterium	Firmicutes	Clostridia	Lachnospirales	Lachnospiraceae	uncultured	uncultured_bacterium
26e4b3c0de2aa098e46ece03ba89d7e3	596	Bacteria;Spirochaetota;Spirochaetia;Spirochaetales;Spirochaetaceae;__;__	Spirochaetota	Spirochaetia	Spirochaetales	Spirochaetaceae
2703697190c05f1070c21a5053c9ea87	376	Bacteria;Desulfobacterota;Desulfovibrionia;Desulfovibrionales;Desulfovibrionaceae;Desulfovibrio;__	Desulfobacterota	Desulfovibrionia	Desulfovibrionales	Desulfovibrionaceae	Desulfovibrio
2705aa061fec7de3fb4c8395b22de9c5	429	Bacteria;Firmicutes;Clostridia;Christensenellales;Christensenellaceae;__;__	Firmicutes	Clostridia	Christensenellales	Christensenellaceae
272269c0b0867955704dd5cb576fc7b6	419	Bacteria;Firmicutes;Bacilli;RF39;RF39;RF39;uncultured_bacterium	Firmicutes	Bacilli	RF39	RF39	RF39	uncultured_bacterium
2734f90e6434e8a4842ef49ae9d3a0c8	416	Bacteria;Firmicutes;Bacilli;Lactobacillales;Streptococcaceae;Streptococcus;uncultured_bacterium	Firmicutes	Bacilli	Lactobacillales	Streptococcaceae	Streptococcus	uncultured_bacterium
2735a536bd1b3bb056638afdcbb074ac	463	Bacteria;Firmicutes;Clostridia;Lachnospirales;Lachnospiraceae;Blautia;uncultured_bacterium	Firmicutes	Clostridia	Lachnospirales	Lachnospiraceae	Blautia	uncultured_bacterium
2758090b96c4bec00ad4129036061bd3	500	Bacteria;Firmicutes;Clostridia;Lachnospirales;Lachnospiraceae;uncultured;uncultured_bacterium	Firmicutes	Clostridia	Lachnospirales	Lachnospiraceae	uncultured	uncultured_bacterium
275b40775cbfd7e5be7921bb2b9df762	472	Bacteria;Firmicutes;Clostridia;Lachnospirales;Lachnospiraceae;Lachnoclostridium;__	Firmicutes	Clostridia	Lachnospirales	Lachnospiraceae	Lachnoclostridium
278d67f698469c5f38e85fbcf2ae39c6	360	Bacteria;Bacteroidota;Bacteroidia;Bacteroidales;Muribaculaceae;Muribaculaceae;uncultured_bacterium	Bacteroidota	Bacteroidia	Bacteroidales	Muribaculaceae	Muribaculaceae	uncultured_bacterium
279de1c1fdad72f0df13658e2a4a551a	360	Bacteria;Bacteroidota;Bacteroidia;Bacteroidales;Muribaculaceae;Muribaculaceae;uncultured_bacterium	Bacteroidota	Bacteroidia	Bacteroidales	Muribaculaceae	Muribaculaceae	uncultured_bacterium
27a766c8723c038335470b1ab535171c	534	Bacteria;Firmicutes;Clostridia;Oscillospirales;Ruminococcaceae;Incertae_Sedis;uncultured_bacterium	Firmicutes	Clostridia	Oscillospirales	Ruminococcaceae	Incertae_Sedis	uncultured_bacterium
27aaf9f24673eff7ea82767a450f08c3	556	Bacteria;Firmicutes;Clostridia;Peptostreptococcales-Tissierellales;Anaerovoracaceae;Family_XIII_UCG-001;uncultured_bacterium	Firmicutes	Clostridia	Peptostreptococcales-Tissierellales	Anaerovoracaceae	Family_XIII_UCG-001	uncultured_bacterium
27b0ae2d7dcaf91cc6b61f3d9e03aea4	486	Bacteria;Firmicutes;Clostridia;Lachnospirales;Lachnospiraceae;Lachnospiraceae_UCG-001;uncultured_bacterium	Firmicutes	Clostridia	Lachnospirales	Lachnospiraceae	Lachnospiraceae_UCG-001	uncultured_bacterium
27c2362bde3de37e7f15066e6c3a94d1	513	Bacteria;Firmicutes;Clostridia;Oscillospirales;Oscillospiraceae;Oscillibacter;uncultured_bacterium	Firmicutes	Clostridia	Oscillospirales	Oscillospiraceae	Oscillibacter	uncultured_bacterium
27ccb0e9c3be835896f399011083045c	456	Bacteria;Firmicutes;Clostridia;Lachnospirales;Lachnospiraceae;Acetitomaculum;uncultured_bacterium	Firmicutes	Clostridia	Lachnospirales	Lachnospiraceae	Acetitomaculum	uncultured_bacterium
27ce591ffc77091ee02240924e56c0a0	471	Bacteria;Firmicutes;Clostridia;Lachnospirales;Lachnospiraceae;GCA-900066575;uncultured_bacterium	Firmicutes	Clostridia	Lachnospirales	Lachnospiraceae	GCA-900066575	uncultured_bacterium
27d5afc83bb74d40c12e654f5f4380fd	486	Bacteria;Firmicutes;Clostridia;Lachnospirales;Lachnospiraceae;Lachnospiraceae_UCG-001;uncultured_bacterium	Firmicutes	Clostridia	Lachnospirales	Lachnospiraceae	Lachnospiraceae_UCG-001	uncultured_bacterium
27dcff933190732555cebe5da8a13cce	544	Bacteria;Firmicutes;Clostridia;Oscillospirales;Ruminococcaceae;uncultured;uncultured_bacterium	Firmicutes	Clostridia	Oscillospirales	Ruminococcaceae	uncultured	uncultured_bacterium
27f67809bd553d84fbcbfa24c25a526d	559	Bacteria;Firmicutes;Clostridia;__;__;__;__	Firmicutes	Clostridia
27fd1f82aeb1a1d8e76c4e1c0d7c2b2c	555	Bacteria;Firmicutes;Clostridia;Peptostreptococcales-Tissierellales;Anaerovoracaceae;Family_XIII_AD3011_group;uncultured_bacterium	Firmicutes	Clostridia	Peptostreptococcales-Tissierellales	Anaerovoracaceae	Family_XIII_AD3011_group	uncultured_bacterium
28059f20dd3cceadd749948c2d794b95	509	Bacteria;Firmicutes;Clostridia;Oscillospirales;Oscillospiraceae;Colidextribacter;uncultured_bacterium	Firmicutes	Clostridia	Oscillospirales	Oscillospiraceae	Colidextribacter	uncultured_bacterium
28083f2faf588a38a5db07f24faaf1c0	500	Bacteria;Firmicutes;Clostridia;Lachnospirales;Lachnospiraceae;uncultured;uncultured_bacterium	Firmicutes	Clostridia	Lachnospirales	Lachnospiraceae	uncultured	uncultured_bacterium
280e16884b452097234f47150c095da3	482	Bacteria;Firmicutes;Clostridia;Lachnospirales;Lachnospiraceae;Lachnospiraceae_NK4A136_group;uncultured_bacterium	Firmicutes	Clostridia	Lachnospirales	Lachnospiraceae	Lachnospiraceae_NK4A136_group	uncultured_bacterium
281956b91f8e871be8bc672ca87a8d4a	482	Bacteria;Firmicutes;Clostridia;Lachnospirales;Lachnospiraceae;Lachnospiraceae_NK4A136_group;uncultured_bacterium	Firmicutes	Clostridia	Lachnospirales	Lachnospiraceae	Lachnospiraceae_NK4A136_group	uncultured_bacterium
281e7072ab2f676e789564d3c7cb472e	500	Bacteria;Firmicutes;Clostridia;Lachnospirales;Lachnospiraceae;uncultured;uncultured_bacterium	Firmicutes	Clostridia	Lachnospirales	Lachnospiraceae	uncultured	uncultured_bacterium
2831173afd7907d70ee9de242abc8d13	513	Bacteria;Firmicutes;Clostridia;Oscillospirales;Oscillospiraceae;Oscillibacter;uncultured_bacterium	Firmicutes	Clostridia	Oscillospirales	Oscillospiraceae	Oscillibacter	uncultured_bacterium
283a046aad93abb0ea9ed72e7e72c5c1	419	Bacteria;Firmicutes;Bacilli;RF39;RF39;RF39;uncultured_bacterium	Firmicutes	Bacilli	RF39	RF39	RF39	uncultured_bacterium
283f835321c660f3afd33edd88c984af	348	Bacteria;Actinobacteriota;Coriobacteriia;Coriobacteriales;Coriobacteriales_Incertae_Sedis;uncultured;uncultured_bacterium	Actinobacteriota	Coriobacteriia	Coriobacteriales	Coriobacteriales_Incertae_Sedis	uncultured	uncultured_bacterium
2858433a40cfac9ad3d45a213571766b	482	Bacteria;Firmicutes;Clostridia;Lachnospirales;Lachnospiraceae;Lachnospiraceae_NK4A136_group;uncultured_bacterium	Firmicutes	Clostridia	Lachnospirales	Lachnospiraceae	Lachnospiraceae_NK4A136_group	uncultured_bacterium
286ad968bd6b5b25e00be56e949c8722	463	Bacteria;Firmicutes;Clostridia;Lachnospirales;Lachnospiraceae;Blautia;uncultured_bacterium	Firmicutes	Clostridia	Lachnospirales	Lachnospiraceae	Blautia	uncultured_bacterium
288ed827b8943fcf47c0614476037449	544	Bacteria;Firmicutes;Clostridia;Oscillospirales;Ruminococcaceae;uncultured;uncultured_bacterium	Firmicutes	Clostridia	Oscillospirales	Ruminococcaceae	uncultured	uncultured_bacterium
28980cc802e0b479578d426ae921c602	518	Bacteria;Firmicutes;Clostridia;Oscillospirales;Oscillospiraceae;UCG-005;uncultured_bacterium	Firmicutes	Clostridia	Oscillospirales	Oscillospiraceae	UCG-005	uncultured_bacterium
28b1802c8300baf370b5e644df8ffc2c	540	Bacteria;Firmicutes;Clostridia;Oscillospirales;Ruminococcaceae;UBA1819;__	Firmicutes	Clostridia	Oscillospirales	Ruminococcaceae	UBA1819
28ba400217d9e7b4569c4034aa591078	486	Bacteria;Firmicutes;Clostridia;Lachnospirales;Lachnospiraceae;Lachnospiraceae_UCG-001;uncultured_bacterium	Firmicutes	Clostridia	Lachnospirales	Lachnospiraceae	Lachnospiraceae_UCG-001	uncultured_bacterium
28c10fe3c57dd172b524d7260afd4554	360	Bacteria;Bacteroidota;Bacteroidia;Bacteroidales;Muribaculaceae;Muribaculaceae;uncultured_bacterium	Bacteroidota	Bacteroidia	Bacteroidales	Muribaculaceae	Muribaculaceae	uncultured_bacterium
28e46a8034761cea64b8531ab746aadb	493	Bacteria;Firmicutes;Clostridia;Lachnospirales;Lachnospiraceae;Roseburia;uncultured_bacterium	Firmicutes	Clostridia	Lachnospirales	Lachnospiraceae	Roseburia	uncultured_bacterium
28f61e3c99dd09925ad0dbb9ea619e59	482	Bacteria;Firmicutes;Clostridia;Lachnospirales;Lachnospiraceae;Lachnospiraceae_NK4A136_group;uncultured_bacterium	Firmicutes	Clostridia	Lachnospirales	Lachnospiraceae	Lachnospiraceae_NK4A136_group	uncultured_bacterium
28fb100260c1a567cc476934a16134c4	360	Bacteria;Bacteroidota;Bacteroidia;Bacteroidales;Muribaculaceae;Muribaculaceae;uncultured_bacterium	Bacteroidota	Bacteroidia	Bacteroidales	Muribaculaceae	Muribaculaceae	uncultured_bacterium
2922f63770c2a648ecaf33ed76eb0244	534	Bacteria;Firmicutes;Clostridia;Oscillospirales;Ruminococcaceae;Incertae_Sedis;uncultured_bacterium	Firmicutes	Clostridia	Oscillospirales	Ruminococcaceae	Incertae_Sedis	uncultured_bacterium
29266ed3e05e194a015298ba9c1541a2	369	Bacteria;Cyanobacteria;Vampirivibrionia;Gastranaerophilales;Gastranaerophilales;Gastranaerophilales;uncultured_bacterium	Cyanobacteria	Vampirivibrionia	Gastranaerophilales	Gastranaerophilales	Gastranaerophilales	uncultured_bacterium
292e4643c54aabcd6f9264990a13626b	499	Bacteria;Firmicutes;Clostridia;Lachnospirales;Lachnospiraceae;uncultured;__	Firmicutes	Clostridia	Lachnospirales	Lachnospiraceae	uncultured
292e812d85f22f46f3a5c3436d0e096f	500	Bacteria;Firmicutes;Clostridia;Lachnospirales;Lachnospiraceae;uncultured;uncultured_bacterium	Firmicutes	Clostridia	Lachnospirales	Lachnospiraceae	uncultured	uncultured_bacterium
29386fa6fb7c5a1853b89f9af75bc2f1	352	Bacteria;Actinobacteriota;Coriobacteriia;Coriobacteriales;Eggerthellaceae;__;__	Actinobacteriota	Coriobacteriia	Coriobacteriales	Eggerthellaceae
293aaf88c22af975f73ebbcd13393ea2	376	Bacteria;Desulfobacterota;Desulfovibrionia;Desulfovibrionales;Desulfovibrionaceae;Desulfovibrio;__	Desulfobacterota	Desulfovibrionia	Desulfovibrionales	Desulfovibrionaceae	Desulfovibrio
294c5083fc79c2a5a9b32f3232768b39	434	Bacteria;Firmicutes;Clostridia;Clostridia_UCG-014;Clostridia_UCG-014;Clostridia_UCG-014;uncultured_bacterium	Firmicutes	Clostridia	Clostridia_UCG-014	Clostridia_UCG-014	Clostridia_UCG-014	uncultured_bacterium
294f4c8e80cb2b6eb49075c0bd5205a8	351	Bacteria;Actinobacteriota;Coriobacteriia;Coriobacteriales;Eggerthellaceae;Enterorhabdus;uncultured_bacterium	Actinobacteriota	Coriobacteriia	Coriobacteriales	Eggerthellaceae	Enterorhabdus	uncultured_bacterium
2952b90ced4d5c1d1bab11f463337e79	360	Bacteria;Bacteroidota;Bacteroidia;Bacteroidales;Muribaculaceae;Muribaculaceae;uncultured_bacterium	Bacteroidota	Bacteroidia	Bacteroidales	Muribaculaceae	Muribaculaceae	uncultured_bacterium
29685e78b1b0fbf4b14f03d4da681f7e	360	Bacteria;Bacteroidota;Bacteroidia;Bacteroidales;Muribaculaceae;Muribaculaceae;uncultured_bacterium	Bacteroidota	Bacteroidia	Bacteroidales	Muribaculaceae	Muribaculaceae	uncultured_bacterium
296c2df1ea8632d5c807b45fd97fddc5	404	Bacteria;Firmicutes;Bacilli;Lactobacillales;Carnobacteriaceae;Atopostipes;uncultured_bacterium	Firmicutes	Bacilli	Lactobacillales	Carnobacteriaceae	Atopostipes	uncultured_bacterium
2974830e0563fc9d267244b139f55633	411	Bacteria;Firmicutes;Bacilli;Lactobacillales;Lactobacillaceae;Lactobacillus;uncultured_bacterium	Firmicutes	Bacilli	Lactobacillales	Lactobacillaceae	Lactobacillus	uncultured_bacterium
2975eb4eed8a4e67f1eed25ab0c9a95e	540	Bacteria;Firmicutes;Clostridia;Oscillospirales;Ruminococcaceae;UBA1819;__	Firmicutes	Clostridia	Oscillospirales	Ruminococcaceae	UBA1819
2998f1f14261aa8ad34e482e13069257	523	Bacteria;Firmicutes;Clostridia;Oscillospirales;Oscillospiraceae;uncultured;uncultured_bacterium	Firmicutes	Clostridia	Oscillospirales	Oscillospiraceae	uncultured	uncultured_bacterium
29a02211d6ed854a827d157a69e6e7f7	487	Bacteria;Firmicutes;Clostridia;Lachnospirales;Lachnospiraceae;Lachnospiraceae_UCG-006;uncultured_bacterium	Firmicutes	Clostridia	Lachnospirales	Lachnospiraceae	Lachnospiraceae_UCG-006	uncultured_bacterium
29accf44e141eda63d4b44c716486775	523	Bacteria;Firmicutes;Clostridia;Oscillospirales;Oscillospiraceae;uncultured;uncultured_bacterium	Firmicutes	Clostridia	Oscillospirales	Oscillospiraceae	uncultured	uncultured_bacterium
29b641fb22d155e7e8f827e0e56b0eaf	411	Bacteria;Firmicutes;Bacilli;Lactobacillales;Lactobacillaceae;Lactobacillus;uncultured_bacterium	Firmicutes	Bacilli	Lactobacillales	Lactobacillaceae	Lactobacillus	uncultured_bacterium
29bea5b2aae2ade2115452448a773f12	417	Bacteria;Firmicutes;Bacilli;Mycoplasmatales;Mycoplasmataceae;Ureaplasma;uncultured_bacterium	Firmicutes	Bacilli	Mycoplasmatales	Mycoplasmataceae	Ureaplasma	uncultured_bacterium
29cd7c0e3e5ebcb211b4eaf962369ca7	360	Bacteria;Bacteroidota;Bacteroidia;Bacteroidales;Muribaculaceae;Muribaculaceae;uncultured_bacterium	Bacteroidota	Bacteroidia	Bacteroidales	Muribaculaceae	Muribaculaceae	uncultured_bacterium
29f2731eab7a7c1938bd5ce63859fc6b	509	Bacteria;Firmicutes;Clostridia;Oscillospirales;Oscillospiraceae;Colidextribacter;uncultured_bacterium	Firmicutes	Clostridia	Oscillospirales	Oscillospiraceae	Colidextribacter	uncultured_bacterium
29f71630d8d4159a0c6ea53241ec94f8	493	Bacteria;Firmicutes;Clostridia;Lachnospirales;Lachnospiraceae;Roseburia;uncultured_bacterium	Firmicutes	Clostridia	Lachnospirales	Lachnospiraceae	Roseburia	uncultured_bacterium
2a0be5e1d02cdb8256cb06e7caff3ac8	498	Bacteria;Firmicutes;Clostridia;Lachnospirales;Lachnospiraceae;__;__	Firmicutes	Clostridia	Lachnospirales	Lachnospiraceae
2a0f032a1e7dbcfe48b468266814aec7	419	Bacteria;Firmicutes;Bacilli;RF39;RF39;RF39;uncultured_bacterium	Firmicutes	Bacilli	RF39	RF39	RF39	uncultured_bacterium
2a3fd3b6558fcf42ff339f559abd8be7	437	Bacteria;Firmicutes;Clostridia;Clostridia_vadinBB60_group;Clostridia_vadinBB60_group;Clostridia_vadinBB60_group;__	Firmicutes	Clostridia	Clostridia_vadinBB60_group	Clostridia_vadinBB60_group	Clostridia_vadinBB60_group
2a408d4fbb707141d3781eda42355853	496	Bacteria;Firmicutes;Clostridia;Lachnospirales;Lachnospiraceae;Tyzzerella;uncultured_bacterium	Firmicutes	Clostridia	Lachnospirales	Lachnospiraceae	Tyzzerella	uncultured_bacterium
2a5bb1367a526df73017e20c44b1234b	471	Bacteria;Firmicutes;Clostridia;Lachnospirales;Lachnospiraceae;GCA-900066575;uncultured_bacterium	Firmicutes	Clostridia	Lachnospirales	Lachnospiraceae	GCA-900066575	uncultured_bacterium
2a61e85a581da4c5e801d6dc4fc16c87	481	Bacteria;Firmicutes;Clostridia;Lachnospirales;Lachnospiraceae;Lachnospiraceae_NK4A136_group;__	Firmicutes	Clostridia	Lachnospirales	Lachnospiraceae	Lachnospiraceae_NK4A136_group
2a69c6f9c42f3fc2839c9e0a5b78ee0f	495	Bacteria;Firmicutes;Clostridia;Lachnospirales;Lachnospiraceae;Tyzzerella;__	Firmicutes	Clostridia	Lachnospirales	Lachnospiraceae	Tyzzerella
2a79a50ca2eaaf9096e41d8d01d10770	517	Bacteria;Firmicutes;Clostridia;Oscillospirales;Oscillospiraceae;UCG-005;__	Firmicutes	Clostridia	Oscillospirales	Oscillospiraceae	UCG-005
2a7f23ba2c91e09780d6fba66a094a34	544	Bacteria;Firmicutes;Clostridia;Oscillospirales;Ruminococcaceae;uncultured;uncultured_bacterium	Firmicutes	Clostridia	Oscillospirales	Ruminococcaceae	uncultured	uncultured_bacterium
2a9940cac3b3d7dcec6f4471c664d4a0	376	Bacteria;Desulfobacterota;Desulfovibrionia;Desulfovibrionales;Desulfovibrionaceae;Desulfovibrio;__	Desulfobacterota	Desulfovibrionia	Desulfovibrionales	Desulfovibrionaceae	Desulfovibrio
2aa34371fc089c684ca20640db5f1e58	498	Bacteria;Firmicutes;Clostridia;Lachnospirales;Lachnospiraceae;__;__	Firmicutes	Clostridia	Lachnospirales	Lachnospiraceae
2ab3a028e03852dedf414ad9d372fda2	500	Bacteria;Firmicutes;Clostridia;Lachnospirales;Lachnospiraceae;uncultured;uncultured_bacterium	Firmicutes	Clostridia	Lachnospirales	Lachnospiraceae	uncultured	uncultured_bacterium
2ac28bef69acf4c70e38c2cdb069e398	534	Bacteria;Firmicutes;Clostridia;Oscillospirales;Ruminococcaceae;Incertae_Sedis;uncultured_bacterium	Firmicutes	Clostridia	Oscillospirales	Ruminococcaceae	Incertae_Sedis	uncultured_bacterium
2adb6aa30029767f2c7ddd1438c6070d	482	Bacteria;Firmicutes;Clostridia;Lachnospirales;Lachnospiraceae;Lachnospiraceae_NK4A136_group;uncultured_bacterium	Firmicutes	Clostridia	Lachnospirales	Lachnospiraceae	Lachnospiraceae_NK4A136_group	uncultured_bacterium
2ae4ce933b13831ed885f50f9817fab8	547	Bacteria;Firmicutes;Clostridia;Peptococcales;Peptococcaceae;Peptococcus;__	Firmicutes	Clostridia	Peptococcales	Peptococcaceae	Peptococcus
2ae7e69c3411c74288c2489e68dec602	544	Bacteria;Firmicutes;Clostridia;Oscillospirales;Ruminococcaceae;uncultured;uncultured_bacterium	Firmicutes	Clostridia	Oscillospirales	Ruminococcaceae	uncultured	uncultured_bacterium
2b019b6c950734864ae9de5263bb6285	572	Bacteria;Proteobacteria;Alphaproteobacteria;Rhodospirillales;uncultured;uncultured;uncultured_bacterium	Proteobacteria	Alphaproteobacteria	Rhodospirillales	uncultured	uncultured	uncultured_bacterium
2b0312b80d04ea56c22cfc832015ad6e	534	Bacteria;Firmicutes;Clostridia;Oscillospirales;Ruminococcaceae;Incertae_Sedis;uncultured_bacterium	Firmicutes	Clostridia	Oscillospirales	Ruminococcaceae	Incertae_Sedis	uncultured_bacterium
2b0329a1173926166dea19f6ac5887c8	534	Bacteria;Firmicutes;Clostridia;Oscillospirales;Ruminococcaceae;Incertae_Sedis;uncultured_bacterium	Firmicutes	Clostridia	Oscillospirales	Ruminococcaceae	Incertae_Sedis	uncultured_bacterium
2b1122ecb5cb12ccda90a03f6bcee707	594	Bacteria;Spirochaetota;Spirochaetia;Spirochaetales;Spirochaetaceae;Treponema;__	Spirochaetota	Spirochaetia	Spirochaetales	Spirochaetaceae	Treponema
2b231c577eae394706832bdd32a020a1	362	Bacteria;Bacteroidota;Bacteroidia;Bacteroidales;Rikenellaceae;Alistipes;uncultured_bacterium	Bacteroidota	Bacteroidia	Bacteroidales	Rikenellaceae	Alistipes	uncultured_bacterium
2b2b2796c711a7ed00d42583d61e945c	438	Bacteria;Firmicutes;Clostridia;Clostridia_vadinBB60_group;Clostridia_vadinBB60_group;Clostridia_vadinBB60_group;uncultured_bacterium	Firmicutes	Clostridia	Clostridia_vadinBB60_group	Clostridia_vadinBB60_group	Clostridia_vadinBB60_group	uncultured_bacterium
2b2c5b70b72fb07361eb1dd1dec233b2	498	Bacteria;Firmicutes;Clostridia;Lachnospirales;Lachnospiraceae;__;__	Firmicutes	Clostridia	Lachnospirales	Lachnospiraceae
2b374d1c7c98a74ec9e0cde22309f7e4	500	Bacteria;Firmicutes;Clostridia;Lachnospirales;Lachnospiraceae;uncultured;uncultured_bacterium	Firmicutes	Clostridia	Lachnospirales	Lachnospiraceae	uncultured	uncultured_bacterium
2b3754c092b0540c71124861dc1a69f3	534	Bacteria;Firmicutes;Clostridia;Oscillospirales;Ruminococcaceae;Incertae_Sedis;uncultured_bacterium	Firmicutes	Clostridia	Oscillospirales	Ruminococcaceae	Incertae_Sedis	uncultured_bacterium
2b4ac9abfd0767e1a1c1251095f8098d	503	Bacteria;Firmicutes;Clostridia;Oscillospirales;[Clostridium]_methylpentosum_group;[Clostridium]_methylpentosum_group;__	Firmicutes	Clostridia	Oscillospirales	[Clostridium]_methylpentosum_group	[Clostridium]_methylpentosum_group
2b51c06b09eb99210c73382109a5527a	498	Bacteria;Firmicutes;Clostridia;Lachnospirales;Lachnospiraceae;__;__	Firmicutes	Clostridia	Lachnospirales	Lachnospiraceae
2b53942da5cb551b7767bbabb492815a	535	Bacteria;Firmicutes;Clostridia;Oscillospirales;Ruminococcaceae;Incertae_Sedis;uncultured_organism	Firmicutes	Clostridia	Oscillospirales	Ruminococcaceae	Incertae_Sedis	uncultured_organism
2b59ffa173ac84dc4b762359615b071e	360	Bacteria;Bacteroidota;Bacteroidia;Bacteroidales;Muribaculaceae;Muribaculaceae;uncultured_bacterium	Bacteroidota	Bacteroidia	Bacteroidales	Muribaculaceae	Muribaculaceae	uncultured_bacterium
2b63072eade33e3cf5998c092429e5b4	499	Bacteria;Firmicutes;Clostridia;Lachnospirales;Lachnospiraceae;uncultured;__	Firmicutes	Clostridia	Lachnospirales	Lachnospiraceae	uncultured
2b6ad20a7d28eecc747f4838bfcd3f94	360	Bacteria;Bacteroidota;Bacteroidia;Bacteroidales;Muribaculaceae;Muribaculaceae;uncultured_bacterium	Bacteroidota	Bacteroidia	Bacteroidales	Muribaculaceae	Muribaculaceae	uncultured_bacterium
2b7bf64bdab7295e5fc1f22f37a45dea	557	Bacteria;Firmicutes;Clostridia;Peptostreptococcales-Tissierellales;Anaerovoracaceae;__;__	Firmicutes	Clostridia	Peptostreptococcales-Tissierellales	Anaerovoracaceae
2b7d25f1377a0589fa2024ce54c85390	360	Bacteria;Bacteroidota;Bacteroidia;Bacteroidales;Muribaculaceae;Muribaculaceae;uncultured_bacterium	Bacteroidota	Bacteroidia	Bacteroidales	Muribaculaceae	Muribaculaceae	uncultured_bacterium
2b8fa4aa344a13e9a849ee56a8c6b594	486	Bacteria;Firmicutes;Clostridia;Lachnospirales;Lachnospiraceae;Lachnospiraceae_UCG-001;uncultured_bacterium	Firmicutes	Clostridia	Lachnospirales	Lachnospiraceae	Lachnospiraceae_UCG-001	uncultured_bacterium
2b921f406cd0dd28844929addbf23fb9	360	Bacteria;Bacteroidota;Bacteroidia;Bacteroidales;Muribaculaceae;Muribaculaceae;uncultured_bacterium	Bacteroidota	Bacteroidia	Bacteroidales	Muribaculaceae	Muribaculaceae	uncultured_bacterium
2ba7063d49bd2daaf700093c9b751399	544	Bacteria;Firmicutes;Clostridia;Oscillospirales;Ruminococcaceae;uncultured;uncultured_bacterium	Firmicutes	Clostridia	Oscillospirales	Ruminococcaceae	uncultured	uncultured_bacterium
2ba93f186a8a51b1c6ef2211d0cafbcb	415	Bacteria;Firmicutes;Bacilli;Lactobacillales;Streptococcaceae;Streptococcus;__	Firmicutes	Bacilli	Lactobacillales	Streptococcaceae	Streptococcus
2bc6d3f37a7a499bf98428eccea4251d	592	Bacteria;Spirochaetota;Brachyspirae;Brachyspirales;Brachyspiraceae;Brachyspira;__	Spirochaetota	Brachyspirae	Brachyspirales	Brachyspiraceae	Brachyspira
2bc7fe102a17383bc350e48ac4892148	498	Bacteria;Firmicutes;Clostridia;Lachnospirales;Lachnospiraceae;__;__	Firmicutes	Clostridia	Lachnospirales	Lachnospiraceae
2bcfa7f1f47d6e698fb0fa5825247888	498	Bacteria;Firmicutes;Clostridia;Lachnospirales;Lachnospiraceae;__;__	Firmicutes	Clostridia	Lachnospirales	Lachnospiraceae
2bcfdf3bf8d99700d9e26eca8e402803	523	Bacteria;Firmicutes;Clostridia;Oscillospirales;Oscillospiraceae;uncultured;uncultured_bacterium	Firmicutes	Clostridia	Oscillospirales	Oscillospiraceae	uncultured	uncultured_bacterium
2bd351d5715bc7eaeb531c46746d22f4	482	Bacteria;Firmicutes;Clostridia;Lachnospirales;Lachnospiraceae;Lachnospiraceae_NK4A136_group;uncultured_bacterium	Firmicutes	Clostridia	Lachnospirales	Lachnospiraceae	Lachnospiraceae_NK4A136_group	uncultured_bacterium
2bd5db5eb1a487ea3ef497cb5167164f	498	Bacteria;Firmicutes;Clostridia;Lachnospirales;Lachnospiraceae;__;__	Firmicutes	Clostridia	Lachnospirales	Lachnospiraceae
2bdf5c33aa27deedaca37c0ab7b882d6	495	Bacteria;Firmicutes;Clostridia;Lachnospirales;Lachnospiraceae;Tyzzerella;__	Firmicutes	Clostridia	Lachnospirales	Lachnospiraceae	Tyzzerella
2be8b4c2f181c5e23c6eeb6698536e93	498	Bacteria;Firmicutes;Clostridia;Lachnospirales;Lachnospiraceae;__;__	Firmicutes	Clostridia	Lachnospirales	Lachnospiraceae
2bf3dbc4dee39bff40f5661f0cd5aa4f	360	Bacteria;Bacteroidota;Bacteroidia;Bacteroidales;Muribaculaceae;Muribaculaceae;uncultured_bacterium	Bacteroidota	Bacteroidia	Bacteroidales	Muribaculaceae	Muribaculaceae	uncultured_bacterium
2c0170b11a725bdc0b54a4fc14f964fd	516	Bacteria;Firmicutes;Clostridia;Oscillospirales;Oscillospiraceae;UCG-003;uncultured_bacterium	Firmicutes	Clostridia	Oscillospirales	Oscillospiraceae	UCG-003	uncultured_bacterium
2c173bb7d8843083adec4017fe73dda7	498	Bacteria;Firmicutes;Clostridia;Lachnospirales;Lachnospiraceae;__;__	Firmicutes	Clostridia	Lachnospirales	Lachnospiraceae
2c2541999f5ee522c702992425ef7b09	351	Bacteria;Actinobacteriota;Coriobacteriia;Coriobacteriales;Eggerthellaceae;Enterorhabdus;uncultured_bacterium	Actinobacteriota	Coriobacteriia	Coriobacteriales	Eggerthellaceae	Enterorhabdus	uncultured_bacterium
2c31a201ac5994148f4a4c9efe41c68a	500	Bacteria;Firmicutes;Clostridia;Lachnospirales;Lachnospiraceae;uncultured;uncultured_bacterium	Firmicutes	Clostridia	Lachnospirales	Lachnospiraceae	uncultured	uncultured_bacterium
2c40cff47465240a677f01ec48d87bc9	499	Bacteria;Firmicutes;Clostridia;Lachnospirales;Lachnospiraceae;uncultured;__	Firmicutes	Clostridia	Lachnospirales	Lachnospiraceae	uncultured
2c4a30e5bd61e36f93ef832fc4beceb7	360	Bacteria;Bacteroidota;Bacteroidia;Bacteroidales;Muribaculaceae;Muribaculaceae;uncultured_bacterium	Bacteroidota	Bacteroidia	Bacteroidales	Muribaculaceae	Muribaculaceae	uncultured_bacterium
2c4d2a2c8bb4725ec5e76bc057689bd9	360	Bacteria;Bacteroidota;Bacteroidia;Bacteroidales;Muribaculaceae;Muribaculaceae;uncultured_bacterium	Bacteroidota	Bacteroidia	Bacteroidales	Muribaculaceae	Muribaculaceae	uncultured_bacterium
2c4e894034343ece7e65ff15a660ca59	500	Bacteria;Firmicutes;Clostridia;Lachnospirales;Lachnospiraceae;uncultured;uncultured_bacterium	Firmicutes	Clostridia	Lachnospirales	Lachnospiraceae	uncultured	uncultured_bacterium
2c57d2f7a636db9eedb43cbd34bec17e	410	Bacteria;Firmicutes;Bacilli;Lactobacillales;Lactobacillaceae;Lactobacillus;__	Firmicutes	Bacilli	Lactobacillales	Lactobacillaceae	Lactobacillus
2c6904ab49524d66bb0f1985ed52f58c	500	Bacteria;Firmicutes;Clostridia;Lachnospirales;Lachnospiraceae;uncultured;uncultured_bacterium	Firmicutes	Clostridia	Lachnospirales	Lachnospiraceae	uncultured	uncultured_bacterium
2c69c122b0726ffae79b7cb1cc6e4e9b	360	Bacteria;Bacteroidota;Bacteroidia;Bacteroidales;Muribaculaceae;Muribaculaceae;uncultured_bacterium	Bacteroidota	Bacteroidia	Bacteroidales	Muribaculaceae	Muribaculaceae	uncultured_bacterium
2c70ac42194d57c140447d8c38701efa	500	Bacteria;Firmicutes;Clostridia;Lachnospirales;Lachnospiraceae;uncultured;uncultured_bacterium	Firmicutes	Clostridia	Lachnospirales	Lachnospiraceae	uncultured	uncultured_bacterium
2c73e9d5aed0366c03fb4d9a2c2ca993	438	Bacteria;Firmicutes;Clostridia;Clostridia_vadinBB60_group;Clostridia_vadinBB60_group;Clostridia_vadinBB60_group;uncultured_bacterium	Firmicutes	Clostridia	Clostridia_vadinBB60_group	Clostridia_vadinBB60_group	Clostridia_vadinBB60_group	uncultured_bacterium
2c76465da01d19a234ccffdbe52564af	438	Bacteria;Firmicutes;Clostridia;Clostridia_vadinBB60_group;Clostridia_vadinBB60_group;Clostridia_vadinBB60_group;uncultured_bacterium	Firmicutes	Clostridia	Clostridia_vadinBB60_group	Clostridia_vadinBB60_group	Clostridia_vadinBB60_group	uncultured_bacterium
2c91e2feb98e3b322049af6749a6194e	425	Bacteria;Firmicutes;Bacilli;Thermoactinomycetales;Thermoactinomycetaceae;Thermoactinomyces;__	Firmicutes	Bacilli	Thermoactinomycetales	Thermoactinomycetaceae	Thermoactinomyces
2ca1b088a8ec4fd9dc1e92564cd603e7	368	Bacteria;Cyanobacteria;Vampirivibrionia;Gastranaerophilales;Gastranaerophilales;Gastranaerophilales;__	Cyanobacteria	Vampirivibrionia	Gastranaerophilales	Gastranaerophilales	Gastranaerophilales
2ca6004ab9e53d150018deb486880d45	434	Bacteria;Firmicutes;Clostridia;Clostridia_UCG-014;Clostridia_UCG-014;Clostridia_UCG-014;uncultured_bacterium	Firmicutes	Clostridia	Clostridia_UCG-014	Clostridia_UCG-014	Clostridia_UCG-014	uncultured_bacterium
2cbb2164487011cbe25dd1b860f05ccc	498	Bacteria;Firmicutes;Clostridia;Lachnospirales;Lachnospiraceae;__;__	Firmicutes	Clostridia	Lachnospirales	Lachnospiraceae
2cc48a1933a671b087ef58c7b186d55f	419	Bacteria;Firmicutes;Bacilli;RF39;RF39;RF39;uncultured_bacterium	Firmicutes	Bacilli	RF39	RF39	RF39	uncultured_bacterium
2cc4c36f8fc1181e3db5af1e6ddeed6c	498	Bacteria;Firmicutes;Clostridia;Lachnospirales;Lachnospiraceae;__;__	Firmicutes	Clostridia	Lachnospirales	Lachnospiraceae
2cde527b24a12e59376b36df975f3812	482	Bacteria;Firmicutes;Clostridia;Lachnospirales;Lachnospiraceae;Lachnospiraceae_NK4A136_group;uncultured_bacterium	Firmicutes	Clostridia	Lachnospirales	Lachnospiraceae	Lachnospiraceae_NK4A136_group	uncultured_bacterium
2ce8f78e7d3b36da0aa2ba6c74c21be2	447	Bacteria;Firmicutes;Clostridia;Lachnospirales;Lachnospiraceae;[Eubacterium]_xylanophilum_group;uncultured_bacterium	Firmicutes	Clostridia	Lachnospirales	Lachnospiraceae	[Eubacterium]_xylanophilum_group	uncultured_bacterium
2cf766cd4fe3d8af44cf846df6378610	482	Bacteria;Firmicutes;Clostridia;Lachnospirales;Lachnospiraceae;Lachnospiraceae_NK4A136_group;uncultured_bacterium	Firmicutes	Clostridia	Lachnospirales	Lachnospiraceae	Lachnospiraceae_NK4A136_group	uncultured_bacterium
2d11b022818996958d9a3aa4399a3969	350	Bacteria;Actinobacteriota;Coriobacteriia;Coriobacteriales;Eggerthellaceae;Enterorhabdus;__	Actinobacteriota	Coriobacteriia	Coriobacteriales	Eggerthellaceae	Enterorhabdus
2d1a189129faf35ae76fc0795a0d91bd	521	Bacteria;Firmicutes;Clostridia;Oscillospirales;Oscillospiraceae;__;__	Firmicutes	Clostridia	Oscillospirales	Oscillospiraceae
2d1db5cee4209fd306ecfc21456d0ade	463	Bacteria;Firmicutes;Clostridia;Lachnospirales;Lachnospiraceae;Blautia;uncultured_bacterium	Firmicutes	Clostridia	Lachnospirales	Lachnospiraceae	Blautia	uncultured_bacterium
2d1e24a637338514f84d50efa733a43a	498	Bacteria;Firmicutes;Clostridia;Lachnospirales;Lachnospiraceae;__;__	Firmicutes	Clostridia	Lachnospirales	Lachnospiraceae
2d1e8a1e446742e53701ec34784897f8	523	Bacteria;Firmicutes;Clostridia;Oscillospirales;Oscillospiraceae;uncultured;uncultured_bacterium	Firmicutes	Clostridia	Oscillospirales	Oscillospiraceae	uncultured	uncultured_bacterium
2d465bad9f02dba56676f0af4c731ce5	500	Bacteria;Firmicutes;Clostridia;Lachnospirales;Lachnospiraceae;uncultured;uncultured_bacterium	Firmicutes	Clostridia	Lachnospirales	Lachnospiraceae	uncultured	uncultured_bacterium
2d51e6f1434fa92450114e2d12b51b01	509	Bacteria;Firmicutes;Clostridia;Oscillospirales;Oscillospiraceae;Colidextribacter;uncultured_bacterium	Firmicutes	Clostridia	Oscillospirales	Oscillospiraceae	Colidextribacter	uncultured_bacterium
2d6060ca07c21c5d7c311f528bfe61ed	471	Bacteria;Firmicutes;Clostridia;Lachnospirales;Lachnospiraceae;GCA-900066575;uncultured_bacterium	Firmicutes	Clostridia	Lachnospirales	Lachnospiraceae	GCA-900066575	uncultured_bacterium
2d690479fd6ca35b25f9a27cc7421f7a	500	Bacteria;Firmicutes;Clostridia;Lachnospirales;Lachnospiraceae;uncultured;uncultured_bacterium	Firmicutes	Clostridia	Lachnospirales	Lachnospiraceae	uncultured	uncultured_bacterium
2d88d5a3fc8fed411df5a6e7256539e0	523	Bacteria;Firmicutes;Clostridia;Oscillospirales;Oscillospiraceae;uncultured;uncultured_bacterium	Firmicutes	Clostridia	Oscillospirales	Oscillospiraceae	uncultured	uncultured_bacterium
2d90f4bf62e708e4415fa400ace5d615	482	Bacteria;Firmicutes;Clostridia;Lachnospirales;Lachnospiraceae;Lachnospiraceae_NK4A136_group;uncultured_bacterium	Firmicutes	Clostridia	Lachnospirales	Lachnospiraceae	Lachnospiraceae_NK4A136_group	uncultured_bacterium
2da2240a77e2c3b9e0534d7b609a565b	495	Bacteria;Firmicutes;Clostridia;Lachnospirales;Lachnospiraceae;Tyzzerella;__	Firmicutes	Clostridia	Lachnospirales	Lachnospiraceae	Tyzzerella
2dabc3cecf90957c46ae08a300f74122	500	Bacteria;Firmicutes;Clostridia;Lachnospirales;Lachnospiraceae;uncultured;uncultured_bacterium	Firmicutes	Clostridia	Lachnospirales	Lachnospiraceae	uncultured	uncultured_bacterium
2dde7544d9ef196833f4e25598b5d640	500	Bacteria;Firmicutes;Clostridia;Lachnospirales;Lachnospiraceae;uncultured;uncultured_bacterium	Firmicutes	Clostridia	Lachnospirales	Lachnospiraceae	uncultured	uncultured_bacterium
2ddfd74029f898f44d8a3f55ce611506	509	Bacteria;Firmicutes;Clostridia;Oscillospirales;Oscillospiraceae;Colidextribacter;uncultured_bacterium	Firmicutes	Clostridia	Oscillospirales	Oscillospiraceae	Colidextribacter	uncultured_bacterium
2df1be885383ce2f7b879a9794dbe2f1	352	Bacteria;Actinobacteriota;Coriobacteriia;Coriobacteriales;Eggerthellaceae;__;__	Actinobacteriota	Coriobacteriia	Coriobacteriales	Eggerthellaceae
2dfb45c367303a6c79f2135e40d94b67	542	Bacteria;Firmicutes;Clostridia;Oscillospirales;Ruminococcaceae;__;__	Firmicutes	Clostridia	Oscillospirales	Ruminococcaceae
2e13afcad8523f3eadaec7135ef2ecdf	482	Bacteria;Firmicutes;Clostridia;Lachnospirales;Lachnospiraceae;Lachnospiraceae_NK4A136_group;uncultured_bacterium	Firmicutes	Clostridia	Lachnospirales	Lachnospiraceae	Lachnospiraceae_NK4A136_group	uncultured_bacterium
2e186a72851dd235cbbd92de0abc6002	500	Bacteria;Firmicutes;Clostridia;Lachnospirales;Lachnospiraceae;uncultured;uncultured_bacterium	Firmicutes	Clostridia	Lachnospirales	Lachnospiraceae	uncultured	uncultured_bacterium
2e1da6ceb0d43ad73de0c89728645fa3	549	Bacteria;Firmicutes;Clostridia;Peptococcales;Peptococcaceae;uncultured;uncultured_bacterium	Firmicutes	Clostridia	Peptococcales	Peptococcaceae	uncultured	uncultured_bacterium
2e46cf00ec511b19e58635fd20e16512	569	Bacteria;Proteobacteria;Alphaproteobacteria;Paracaedibacterales;Paracaedibacteraceae;uncultured;uncultured_bacterium	Proteobacteria	Alphaproteobacteria	Paracaedibacterales	Paracaedibacteraceae	uncultured	uncultured_bacterium
2e5edb86e9c53c3e74473e3c798004e5	429	Bacteria;Firmicutes;Clostridia;Christensenellales;Christensenellaceae;__;__	Firmicutes	Clostridia	Christensenellales	Christensenellaceae
2e676558a3f9d1c46ead37aa72b4cd76	360	Bacteria;Bacteroidota;Bacteroidia;Bacteroidales;Muribaculaceae;Muribaculaceae;uncultured_bacterium	Bacteroidota	Bacteroidia	Bacteroidales	Muribaculaceae	Muribaculaceae	uncultured_bacterium
2e76f545d86a3882bafbff14c70304d6	509	Bacteria;Firmicutes;Clostridia;Oscillospirales;Oscillospiraceae;Colidextribacter;uncultured_bacterium	Firmicutes	Clostridia	Oscillospirales	Oscillospiraceae	Colidextribacter	uncultured_bacterium
2e8d8533e9df09166990b7f7862f4f0a	499	Bacteria;Firmicutes;Clostridia;Lachnospirales;Lachnospiraceae;uncultured;__	Firmicutes	Clostridia	Lachnospirales	Lachnospiraceae	uncultured
2e8eefd3dd86b0847e9f1563c11ef273	373	Bacteria;Desulfobacterota;Desulfovibrionia;Desulfovibrionales;Desulfomicrobiaceae;Desulfomicrobium;uncultured_bacterium	Desulfobacterota	Desulfovibrionia	Desulfovibrionales	Desulfomicrobiaceae	Desulfomicrobium	uncultured_bacterium
2e9c3b443be32eee57f7c351cf6a551c	351	Bacteria;Actinobacteriota;Coriobacteriia;Coriobacteriales;Eggerthellaceae;Enterorhabdus;uncultured_bacterium	Actinobacteriota	Coriobacteriia	Coriobacteriales	Eggerthellaceae	Enterorhabdus	uncultured_bacterium
2eb75d652d6268db24e287b9e4fc5960	505	Bacteria;Firmicutes;Clostridia;Oscillospirales;Butyricicoccaceae;Butyricicoccus;uncultured_bacterium	Firmicutes	Clostridia	Oscillospirales	Butyricicoccaceae	Butyricicoccus	uncultured_bacterium
2ebb8310251fb41f1dc9e9b9db6c329a	438	Bacteria;Firmicutes;Clostridia;Clostridia_vadinBB60_group;Clostridia_vadinBB60_group;Clostridia_vadinBB60_group;uncultured_bacterium	Firmicutes	Clostridia	Clostridia_vadinBB60_group	Clostridia_vadinBB60_group	Clostridia_vadinBB60_group	uncultured_bacterium
2ebdead7bf88482d4a34ecb3196f7058	484	Bacteria;Firmicutes;Clostridia;Lachnospirales;Lachnospiraceae;Lachnospiraceae_NK4B4_group;uncultured_bacterium	Firmicutes	Clostridia	Lachnospirales	Lachnospiraceae	Lachnospiraceae_NK4B4_group	uncultured_bacterium
2ecc716f4c77c87ffc313b50c2e3ad1d	531	Bacteria;Firmicutes;Clostridia;Oscillospirales;Ruminococcaceae;Fournierella;__	Firmicutes	Clostridia	Oscillospirales	Ruminococcaceae	Fournierella
2f17cb547305f67d80c77e8fdb7ac247	500	Bacteria;Firmicutes;Clostridia;Lachnospirales;Lachnospiraceae;uncultured;uncultured_bacterium	Firmicutes	Clostridia	Lachnospirales	Lachnospiraceae	uncultured	uncultured_bacterium
2f1972c87aed1882ffb9fbe88aed33cd	376	Bacteria;Desulfobacterota;Desulfovibrionia;Desulfovibrionales;Desulfovibrionaceae;Desulfovibrio;__	Desulfobacterota	Desulfovibrionia	Desulfovibrionales	Desulfovibrionaceae	Desulfovibrio
2f1c48790aff91b9a051787fef9adcfd	500	Bacteria;Firmicutes;Clostridia;Lachnospirales;Lachnospiraceae;uncultured;uncultured_bacterium	Firmicutes	Clostridia	Lachnospirales	Lachnospiraceae	uncultured	uncultured_bacterium
2f297999728ace6599faf73ab2018fe4	360	Bacteria;Bacteroidota;Bacteroidia;Bacteroidales;Muribaculaceae;Muribaculaceae;uncultured_bacterium	Bacteroidota	Bacteroidia	Bacteroidales	Muribaculaceae	Muribaculaceae	uncultured_bacterium
2f41c832b5b2297be4dde73571f83668	540	Bacteria;Firmicutes;Clostridia;Oscillospirales;Ruminococcaceae;UBA1819;__	Firmicutes	Clostridia	Oscillospirales	Ruminococcaceae	UBA1819
2f57825bf6fc4b541e9d057048b7f038	492	Bacteria;Firmicutes;Clostridia;Lachnospirales;Lachnospiraceae;Roseburia;__	Firmicutes	Clostridia	Lachnospirales	Lachnospiraceae	Roseburia
2f5c2424697c12184d1b44ffdf02d16a	482	Bacteria;Firmicutes;Clostridia;Lachnospirales;Lachnospiraceae;Lachnospiraceae_NK4A136_group;uncultured_bacterium	Firmicutes	Clostridia	Lachnospirales	Lachnospiraceae	Lachnospiraceae_NK4A136_group	uncultured_bacterium
2f60724de34e2e61890957d58584a52e	536	Bacteria;Firmicutes;Clostridia;Oscillospirales;Ruminococcaceae;Paludicola;uncultured_bacterium	Firmicutes	Clostridia	Oscillospirales	Ruminococcaceae	Paludicola	uncultured_bacterium
2f62be1a843ecc2fac077796748e8a97	518	Bacteria;Firmicutes;Clostridia;Oscillospirales;Oscillospiraceae;UCG-005;uncultured_bacterium	Firmicutes	Clostridia	Oscillospirales	Oscillospiraceae	UCG-005	uncultured_bacterium
2f6eb78ffd4efdd8ba0e4567d28f76d0	500	Bacteria;Firmicutes;Clostridia;Lachnospirales;Lachnospiraceae;uncultured;uncultured_bacterium	Firmicutes	Clostridia	Lachnospirales	Lachnospiraceae	uncultured	uncultured_bacterium
2f70c920df6e22689ca06f5433127dd4	360	Bacteria;Bacteroidota;Bacteroidia;Bacteroidales;Muribaculaceae;Muribaculaceae;uncultured_bacterium	Bacteroidota	Bacteroidia	Bacteroidales	Muribaculaceae	Muribaculaceae	uncultured_bacterium
2f74a1cd35b71659371bf02616dbe1f7	482	Bacteria;Firmicutes;Clostridia;Lachnospirales;Lachnospiraceae;Lachnospiraceae_NK4A136_group;uncultured_bacterium	Firmicutes	Clostridia	Lachnospirales	Lachnospiraceae	Lachnospiraceae_NK4A136_group	uncultured_bacterium
2f87079c384a1b9c02a10991160618ff	360	Bacteria;Bacteroidota;Bacteroidia;Bacteroidales;Muribaculaceae;Muribaculaceae;uncultured_bacterium	Bacteroidota	Bacteroidia	Bacteroidales	Muribaculaceae	Muribaculaceae	uncultured_bacterium
2fabd68d1e1e23be8833586a1ffec388	505	Bacteria;Firmicutes;Clostridia;Oscillospirales;Butyricicoccaceae;Butyricicoccus;uncultured_bacterium	Firmicutes	Clostridia	Oscillospirales	Butyricicoccaceae	Butyricicoccus	uncultured_bacterium
2fbe5aa6401cc533b529f20054f0c77f	351	Bacteria;Actinobacteriota;Coriobacteriia;Coriobacteriales;Eggerthellaceae;Enterorhabdus;uncultured_bacterium	Actinobacteriota	Coriobacteriia	Coriobacteriales	Eggerthellaceae	Enterorhabdus	uncultured_bacterium
2fd14dfa3b5fac288caf7491ae791c27	498	Bacteria;Firmicutes;Clostridia;Lachnospirales;Lachnospiraceae;__;__	Firmicutes	Clostridia	Lachnospirales	Lachnospiraceae
2fda34b9e18cee92ce645f3d115b35af	521	Bacteria;Firmicutes;Clostridia;Oscillospirales;Oscillospiraceae;__;__	Firmicutes	Clostridia	Oscillospirales	Oscillospiraceae
2fdc1f95a665601b3df1262fb34ac85f	463	Bacteria;Firmicutes;Clostridia;Lachnospirales;Lachnospiraceae;Blautia;uncultured_bacterium	Firmicutes	Clostridia	Lachnospirales	Lachnospiraceae	Blautia	uncultured_bacterium
2ff66748c3dad77b24fadb68bb440b06	500	Bacteria;Firmicutes;Clostridia;Lachnospirales;Lachnospiraceae;uncultured;uncultured_bacterium	Firmicutes	Clostridia	Lachnospirales	Lachnospiraceae	uncultured	uncultured_bacterium
300ee11bfad35e0d6501644c1d194f08	540	Bacteria;Firmicutes;Clostridia;Oscillospirales;Ruminococcaceae;UBA1819;__	Firmicutes	Clostridia	Oscillospirales	Ruminococcaceae	UBA1819
301e8b7cfae70b76da7ffd743812e94c	523	Bacteria;Firmicutes;Clostridia;Oscillospirales;Oscillospiraceae;uncultured;uncultured_bacterium	Firmicutes	Clostridia	Oscillospirales	Oscillospiraceae	uncultured	uncultured_bacterium
3027fac8b35e97da80879c16211269c8	500	Bacteria;Firmicutes;Clostridia;Lachnospirales;Lachnospiraceae;uncultured;uncultured_bacterium	Firmicutes	Clostridia	Lachnospirales	Lachnospiraceae	uncultured	uncultured_bacterium
303f48ed977cc9e4bbc1f94e50010182	523	Bacteria;Firmicutes;Clostridia;Oscillospirales;Oscillospiraceae;uncultured;uncultured_bacterium	Firmicutes	Clostridia	Oscillospirales	Oscillospiraceae	uncultured	uncultured_bacterium
3044bf3ed463d00ac886a922ca93db4f	542	Bacteria;Firmicutes;Clostridia;Oscillospirales;Ruminococcaceae;__;__	Firmicutes	Clostridia	Oscillospirales	Ruminococcaceae
30481569958e267329e59b2a881fb60e	523	Bacteria;Firmicutes;Clostridia;Oscillospirales;Oscillospiraceae;uncultured;uncultured_bacterium	Firmicutes	Clostridia	Oscillospirales	Oscillospiraceae	uncultured	uncultured_bacterium
30543e728006885ac27f20c93a3e12b5	534	Bacteria;Firmicutes;Clostridia;Oscillospirales;Ruminococcaceae;Incertae_Sedis;uncultured_bacterium	Firmicutes	Clostridia	Oscillospirales	Ruminococcaceae	Incertae_Sedis	uncultured_bacterium
30581bb79fc478faf6d03b4c7e9f4f9d	438	Bacteria;Firmicutes;Clostridia;Clostridia_vadinBB60_group;Clostridia_vadinBB60_group;Clostridia_vadinBB60_group;uncultured_bacterium	Firmicutes	Clostridia	Clostridia_vadinBB60_group	Clostridia_vadinBB60_group	Clostridia_vadinBB60_group	uncultured_bacterium
307186a79d89ddf97571586237958a60	461	Bacteria;Firmicutes;Clostridia;Lachnospirales;Lachnospiraceae;ASF356;uncultured_bacterium	Firmicutes	Clostridia	Lachnospirales	Lachnospiraceae	ASF356	uncultured_bacterium
30779084ff3bdb48c9ee2fb3a02fb95c	500	Bacteria;Firmicutes;Clostridia;Lachnospirales;Lachnospiraceae;uncultured;uncultured_bacterium	Firmicutes	Clostridia	Lachnospirales	Lachnospiraceae	uncultured	uncultured_bacterium
307b0c793f5685908f55440e926f496a	530	Bacteria;Firmicutes;Clostridia;Oscillospirales;Ruminococcaceae;Candidatus_Soleaferrea;uncultured_bacterium	Firmicutes	Clostridia	Oscillospirales	Ruminococcaceae	Candidatus_Soleaferrea	uncultured_bacterium
309ae1522524517b0772420c98fb4b73	493	Bacteria;Firmicutes;Clostridia;Lachnospirales;Lachnospiraceae;Roseburia;uncultured_bacterium	Firmicutes	Clostridia	Lachnospirales	Lachnospiraceae	Roseburia	uncultured_bacterium
30a70122ebedab426522586073dd8d9c	537	Bacteria;Firmicutes;Clostridia;Oscillospirales;Ruminococcaceae;Ruminococcaceae;uncultured_bacterium	Firmicutes	Clostridia	Oscillospirales	Ruminococcaceae	Ruminococcaceae	uncultured_bacterium
30b0878107f734c61cdb472cdcf12246	500	Bacteria;Firmicutes;Clostridia;Lachnospirales;Lachnospiraceae;uncultured;uncultured_bacterium	Firmicutes	Clostridia	Lachnospirales	Lachnospiraceae	uncultured	uncultured_bacterium
30b1225dfb62aa4edbcca26b977a6053	526	Bacteria;Firmicutes;Clostridia;Oscillospirales;Ruminococcaceae;[Eubacterium]_siraeum_group;uncultured_bacterium	Firmicutes	Clostridia	Oscillospirales	Ruminococcaceae	[Eubacterium]_siraeum_group	uncultured_bacterium
30c672e275d6aec6390b128d081858b1	482	Bacteria;Firmicutes;Clostridia;Lachnospirales;Lachnospiraceae;Lachnospiraceae_NK4A136_group;uncultured_bacterium	Firmicutes	Clostridia	Lachnospirales	Lachnospiraceae	Lachnospiraceae_NK4A136_group	uncultured_bacterium
30c94748cbade652a9f06e9de265700d	498	Bacteria;Firmicutes;Clostridia;Lachnospirales;Lachnospiraceae;__;__	Firmicutes	Clostridia	Lachnospirales	Lachnospiraceae
30d26fe92d1f8eebaaca10290f7a5710	360	Bacteria;Bacteroidota;Bacteroidia;Bacteroidales;Muribaculaceae;Muribaculaceae;uncultured_bacterium	Bacteroidota	Bacteroidia	Bacteroidales	Muribaculaceae	Muribaculaceae	uncultured_bacterium
30d9d424751677d36d780b3847cd4c5c	500	Bacteria;Firmicutes;Clostridia;Lachnospirales;Lachnospiraceae;uncultured;uncultured_bacterium	Firmicutes	Clostridia	Lachnospirales	Lachnospiraceae	uncultured	uncultured_bacterium
30f7989f751c4548c018c72532fc85cc	523	Bacteria;Firmicutes;Clostridia;Oscillospirales;Oscillospiraceae;uncultured;uncultured_bacterium	Firmicutes	Clostridia	Oscillospirales	Oscillospiraceae	uncultured	uncultured_bacterium
30fc16cef27d519c98f92e09ec3af67f	500	Bacteria;Firmicutes;Clostridia;Lachnospirales;Lachnospiraceae;uncultured;uncultured_bacterium	Firmicutes	Clostridia	Lachnospirales	Lachnospiraceae	uncultured	uncultured_bacterium
31098eabcb2c73abab80d9a96678b7ba	434	Bacteria;Firmicutes;Clostridia;Clostridia_UCG-014;Clostridia_UCG-014;Clostridia_UCG-014;uncultured_bacterium	Firmicutes	Clostridia	Clostridia_UCG-014	Clostridia_UCG-014	Clostridia_UCG-014	uncultured_bacterium
310e8a1bd8f805b85a3f040d753c3ddc	498	Bacteria;Firmicutes;Clostridia;Lachnospirales;Lachnospiraceae;__;__	Firmicutes	Clostridia	Lachnospirales	Lachnospiraceae
3124d65bda743f5ca5fe2d168d945104	418	Bacteria;Firmicutes;Bacilli;RF39;RF39;RF39;__	Firmicutes	Bacilli	RF39	RF39	RF39
3126ab8dbfb259827951b879c9a4c699	493	Bacteria;Firmicutes;Clostridia;Lachnospirales;Lachnospiraceae;Roseburia;uncultured_bacterium	Firmicutes	Clostridia	Lachnospirales	Lachnospiraceae	Roseburia	uncultured_bacterium
31392901eff85bfabc7c1920260795d6	500	Bacteria;Firmicutes;Clostridia;Lachnospirales;Lachnospiraceae;uncultured;uncultured_bacterium	Firmicutes	Clostridia	Lachnospirales	Lachnospiraceae	uncultured	uncultured_bacterium
3144c423c932b42265a8e5a2d92a0e69	500	Bacteria;Firmicutes;Clostridia;Lachnospirales;Lachnospiraceae;uncultured;uncultured_bacterium	Firmicutes	Clostridia	Lachnospirales	Lachnospiraceae	uncultured	uncultured_bacterium
314fc7cbcbe9f8d1b91fe7f12a67df70	500	Bacteria;Firmicutes;Clostridia;Lachnospirales;Lachnospiraceae;uncultured;uncultured_bacterium	Firmicutes	Clostridia	Lachnospirales	Lachnospiraceae	uncultured	uncultured_bacterium
315e3bfd0bb29bbe80af7c2d6e8fa7fe	553	Bacteria;Firmicutes;Clostridia;Peptostreptococcales-Tissierellales;Anaerovoracaceae;Anaerovorax;uncultured_bacterium	Firmicutes	Clostridia	Peptostreptococcales-Tissierellales	Anaerovoracaceae	Anaerovorax	uncultured_bacterium
317f0758be3a9d69687a380421a02cc2	500	Bacteria;Firmicutes;Clostridia;Lachnospirales;Lachnospiraceae;uncultured;uncultured_bacterium	Firmicutes	Clostridia	Lachnospirales	Lachnospiraceae	uncultured	uncultured_bacterium
31860e5a844e7f89074b64466d810c83	550	Bacteria;Firmicutes;Clostridia;Peptostreptococcales-Tissierellales;Anaerovoracaceae;[Eubacterium]_brachy_group;uncultured_bacterium	Firmicutes	Clostridia	Peptostreptococcales-Tissierellales	Anaerovoracaceae	[Eubacterium]_brachy_group	uncultured_bacterium
3189b0f6930914d6089804ee7150b5c1	500	Bacteria;Firmicutes;Clostridia;Lachnospirales;Lachnospiraceae;uncultured;uncultured_bacterium	Firmicutes	Clostridia	Lachnospirales	Lachnospiraceae	uncultured	uncultured_bacterium
318cf1c4655da643ebc4994f26693860	500	Bacteria;Firmicutes;Clostridia;Lachnospirales;Lachnospiraceae;uncultured;uncultured_bacterium	Firmicutes	Clostridia	Lachnospirales	Lachnospiraceae	uncultured	uncultured_bacterium
31a6250d6fb6af5924643c596edaab9a	452	Bacteria;Firmicutes;Clostridia;Lachnospirales;Lachnospiraceae;A2;uncultured_bacterium	Firmicutes	Clostridia	Lachnospirales	Lachnospiraceae	A2	uncultured_bacterium
31b8eaea82e5e1ddbfb6a0bd63e1c1ff	369	Bacteria;Cyanobacteria;Vampirivibrionia;Gastranaerophilales;Gastranaerophilales;Gastranaerophilales;uncultured_bacterium	Cyanobacteria	Vampirivibrionia	Gastranaerophilales	Gastranaerophilales	Gastranaerophilales	uncultured_bacterium
31ba1f193d2502df1165a1ccf6c696f2	434	Bacteria;Firmicutes;Clostridia;Clostridia_UCG-014;Clostridia_UCG-014;Clostridia_UCG-014;uncultured_bacterium	Firmicutes	Clostridia	Clostridia_UCG-014	Clostridia_UCG-014	Clostridia_UCG-014	uncultured_bacterium
31c3d799fe4a2a67f6ad00eefcb26469	534	Bacteria;Firmicutes;Clostridia;Oscillospirales;Ruminococcaceae;Incertae_Sedis;uncultured_bacterium	Firmicutes	Clostridia	Oscillospirales	Ruminococcaceae	Incertae_Sedis	uncultured_bacterium
31e02ba7aad3b358299508646e1884b7	360	Bacteria;Bacteroidota;Bacteroidia;Bacteroidales;Muribaculaceae;Muribaculaceae;uncultured_bacterium	Bacteroidota	Bacteroidia	Bacteroidales	Muribaculaceae	Muribaculaceae	uncultured_bacterium
31e52f2fe38afe8c9276ad4d1f608497	544	Bacteria;Firmicutes;Clostridia;Oscillospirales;Ruminococcaceae;uncultured;uncultured_bacterium	Firmicutes	Clostridia	Oscillospirales	Ruminococcaceae	uncultured	uncultured_bacterium
31eb5dc4b749c4a4cb87437e9a2590d5	482	Bacteria;Firmicutes;Clostridia;Lachnospirales;Lachnospiraceae;Lachnospiraceae_NK4A136_group;uncultured_bacterium	Firmicutes	Clostridia	Lachnospirales	Lachnospiraceae	Lachnospiraceae_NK4A136_group	uncultured_bacterium
31ee241a9882be463f241ed42885b3f3	545	Bacteria;Firmicutes;Clostridia;Oscillospirales;UCG-010;UCG-010;uncultured_bacterium	Firmicutes	Clostridia	Oscillospirales	UCG-010	UCG-010	uncultured_bacterium
31f4c9f7e66fe6d8777b2f6fedf317cf	500	Bacteria;Firmicutes;Clostridia;Lachnospirales;Lachnospiraceae;uncultured;uncultured_bacterium	Firmicutes	Clostridia	Lachnospirales	Lachnospiraceae	uncultured	uncultured_bacterium
31f553cfbaa0fe9257581927fbd5daf5	482	Bacteria;Firmicutes;Clostridia;Lachnospirales;Lachnospiraceae;Lachnospiraceae_NK4A136_group;uncultured_bacterium	Firmicutes	Clostridia	Lachnospirales	Lachnospiraceae	Lachnospiraceae_NK4A136_group	uncultured_bacterium
3218e893e863ac1f3f9e57237440fd61	362	Bacteria;Bacteroidota;Bacteroidia;Bacteroidales;Rikenellaceae;Alistipes;uncultured_bacterium	Bacteroidota	Bacteroidia	Bacteroidales	Rikenellaceae	Alistipes	uncultured_bacterium
323924677c94df87bf296dff4dee6e38	479	Bacteria;Firmicutes;Clostridia;Lachnospirales;Lachnospiraceae;Lachnospiraceae_FCS020_group;uncultured_bacterium	Firmicutes	Clostridia	Lachnospirales	Lachnospiraceae	Lachnospiraceae_FCS020_group	uncultured_bacterium
32427480615850a13a65b276f87ce4da	498	Bacteria;Firmicutes;Clostridia;Lachnospirales;Lachnospiraceae;__;__	Firmicutes	Clostridia	Lachnospirales	Lachnospiraceae
325a78af6381234ba5e65013e1eb0d50	499	Bacteria;Firmicutes;Clostridia;Lachnospirales;Lachnospiraceae;uncultured;__	Firmicutes	Clostridia	Lachnospirales	Lachnospiraceae	uncultured
3266beaa611eb64485a6721aad3c59dd	430	Bacteria;Firmicutes;Clostridia;Christensenellales;Christensenellaceae;uncultured;__	Firmicutes	Clostridia	Christensenellales	Christensenellaceae	uncultured
3266cf9f7cce9bb0bbb941b86379d610	498	Bacteria;Firmicutes;Clostridia;Lachnospirales;Lachnospiraceae;__;__	Firmicutes	Clostridia	Lachnospirales	Lachnospiraceae
3270b96abfb7ef992c23dcec93a61a96	500	Bacteria;Firmicutes;Clostridia;Lachnospirales;Lachnospiraceae;uncultured;uncultured_bacterium	Firmicutes	Clostridia	Lachnospirales	Lachnospiraceae	uncultured	uncultured_bacterium
3298306eeda9c10c76e9f5be23943530	473	Bacteria;Firmicutes;Clostridia;Lachnospirales;Lachnospiraceae;Lachnoclostridium;uncultured_bacterium	Firmicutes	Clostridia	Lachnospirales	Lachnospiraceae	Lachnoclostridium	uncultured_bacterium
32a0698d9ab6be9efd82a0162a2b930c	531	Bacteria;Firmicutes;Clostridia;Oscillospirales;Ruminococcaceae;Fournierella;__	Firmicutes	Clostridia	Oscillospirales	Ruminococcaceae	Fournierella
32a475dde3df7206e6a65cb498730d71	523	Bacteria;Firmicutes;Clostridia;Oscillospirales;Oscillospiraceae;uncultured;uncultured_bacterium	Firmicutes	Clostridia	Oscillospirales	Oscillospiraceae	uncultured	uncultured_bacterium
32b3f82ec1c3d151abcfb4edfc8f37eb	429	Bacteria;Firmicutes;Clostridia;Christensenellales;Christensenellaceae;__;__	Firmicutes	Clostridia	Christensenellales	Christensenellaceae
32c1e46e06b14c791afbbe93e09c7573	498	Bacteria;Firmicutes;Clostridia;Lachnospirales;Lachnospiraceae;__;__	Firmicutes	Clostridia	Lachnospirales	Lachnospiraceae
32cb4e953ab8c4cf27d3c14b96443a79	597	Bacteria;Verrucomicrobiota;Verrucomicrobiae;Opitutales;Puniceicoccaceae;__;__	Verrucomicrobiota	Verrucomicrobiae	Opitutales	Puniceicoccaceae
32d9e970bb739781aac77f205cf108c0	482	Bacteria;Firmicutes;Clostridia;Lachnospirales;Lachnospiraceae;Lachnospiraceae_NK4A136_group;uncultured_bacterium	Firmicutes	Clostridia	Lachnospirales	Lachnospiraceae	Lachnospiraceae_NK4A136_group	uncultured_bacterium
32dc19e323897494d6b21ad5f73a6a19	375	Bacteria;Desulfobacterota;Desulfovibrionia;Desulfovibrionales;Desulfovibrionaceae;Desulfovibrio;Desulfovibrio_hydrothermalis	Desulfobacterota	Desulfovibrionia	Desulfovibrionales	Desulfovibrionaceae	Desulfovibrio	Desulfovibrio_hydrothermalis
32e2048865a5eb18a888925d48d17131	498	Bacteria;Firmicutes;Clostridia;Lachnospirales;Lachnospiraceae;__;__	Firmicutes	Clostridia	Lachnospirales	Lachnospiraceae
3305daee97e26e8d44742c7ec3426dae	360	Bacteria;Bacteroidota;Bacteroidia;Bacteroidales;Muribaculaceae;Muribaculaceae;uncultured_bacterium	Bacteroidota	Bacteroidia	Bacteroidales	Muribaculaceae	Muribaculaceae	uncultured_bacterium
3306e106921cc9bc459ec25b2f41c25e	438	Bacteria;Firmicutes;Clostridia;Clostridia_vadinBB60_group;Clostridia_vadinBB60_group;Clostridia_vadinBB60_group;uncultured_bacterium	Firmicutes	Clostridia	Clostridia_vadinBB60_group	Clostridia_vadinBB60_group	Clostridia_vadinBB60_group	uncultured_bacterium
3313287715d9971e184c518b42bbec5a	493	Bacteria;Firmicutes;Clostridia;Lachnospirales;Lachnospiraceae;Roseburia;uncultured_bacterium	Firmicutes	Clostridia	Lachnospirales	Lachnospiraceae	Roseburia	uncultured_bacterium
3316d30eda22cb4928cb180c5651b1e2	482	Bacteria;Firmicutes;Clostridia;Lachnospirales;Lachnospiraceae;Lachnospiraceae_NK4A136_group;uncultured_bacterium	Firmicutes	Clostridia	Lachnospirales	Lachnospiraceae	Lachnospiraceae_NK4A136_group	uncultured_bacterium
33179e5c8b42fce71555ef076a43d5a9	553	Bacteria;Firmicutes;Clostridia;Peptostreptococcales-Tissierellales;Anaerovoracaceae;Anaerovorax;uncultured_bacterium	Firmicutes	Clostridia	Peptostreptococcales-Tissierellales	Anaerovoracaceae	Anaerovorax	uncultured_bacterium
3338adee92296bdd6f3b266cb8ddcd85	438	Bacteria;Firmicutes;Clostridia;Clostridia_vadinBB60_group;Clostridia_vadinBB60_group;Clostridia_vadinBB60_group;uncultured_bacterium	Firmicutes	Clostridia	Clostridia_vadinBB60_group	Clostridia_vadinBB60_group	Clostridia_vadinBB60_group	uncultured_bacterium
333d0362add2a3dba43f0a6176f7548d	498	Bacteria;Firmicutes;Clostridia;Lachnospirales;Lachnospiraceae;__;__	Firmicutes	Clostridia	Lachnospirales	Lachnospiraceae
33492e75744ab7548876f55e203005e1	559	Bacteria;Firmicutes;Clostridia;__;__;__;__	Firmicutes	Clostridia
334cdc3f46633285aed251f6c4633941	523	Bacteria;Firmicutes;Clostridia;Oscillospirales;Oscillospiraceae;uncultured;uncultured_bacterium	Firmicutes	Clostridia	Oscillospirales	Oscillospiraceae	uncultured	uncultured_bacterium
335939256a4bde47fcd3dd741705bffc	544	Bacteria;Firmicutes;Clostridia;Oscillospirales;Ruminococcaceae;uncultured;uncultured_bacterium	Firmicutes	Clostridia	Oscillospirales	Ruminococcaceae	uncultured	uncultured_bacterium
335e17856b3cd404269021573802d869	547	Bacteria;Firmicutes;Clostridia;Peptococcales;Peptococcaceae;Peptococcus;__	Firmicutes	Clostridia	Peptococcales	Peptococcaceae	Peptococcus
33605ae79f78e3e06faa34c5afe5e946	496	Bacteria;Firmicutes;Clostridia;Lachnospirales;Lachnospiraceae;Tyzzerella;uncultured_bacterium	Firmicutes	Clostridia	Lachnospirales	Lachnospiraceae	Tyzzerella	uncultured_bacterium
3378f6af3989b18791ae8b083c5b195d	411	Bacteria;Firmicutes;Bacilli;Lactobacillales;Lactobacillaceae;Lactobacillus;uncultured_bacterium	Firmicutes	Bacilli	Lactobacillales	Lactobacillaceae	Lactobacillus	uncultured_bacterium
339f0fd40b401efba315d75404ec1fdf	493	Bacteria;Firmicutes;Clostridia;Lachnospirales;Lachnospiraceae;Roseburia;uncultured_bacterium	Firmicutes	Clostridia	Lachnospirales	Lachnospiraceae	Roseburia	uncultured_bacterium
33a7eac7d0b30b48c878b79e4cf7e410	500	Bacteria;Firmicutes;Clostridia;Lachnospirales;Lachnospiraceae;uncultured;uncultured_bacterium	Firmicutes	Clostridia	Lachnospirales	Lachnospiraceae	uncultured	uncultured_bacterium
33a8b2e9faa83ffe9e76bcf2265f0b63	523	Bacteria;Firmicutes;Clostridia;Oscillospirales;Oscillospiraceae;uncultured;uncultured_bacterium	Firmicutes	Clostridia	Oscillospirales	Oscillospiraceae	uncultured	uncultured_bacterium
33b18cd253232c317bc5900027a89daf	438	Bacteria;Firmicutes;Clostridia;Clostridia_vadinBB60_group;Clostridia_vadinBB60_group;Clostridia_vadinBB60_group;uncultured_bacterium	Firmicutes	Clostridia	Clostridia_vadinBB60_group	Clostridia_vadinBB60_group	Clostridia_vadinBB60_group	uncultured_bacterium
33d9259da142da9a693897a0528a9590	493	Bacteria;Firmicutes;Clostridia;Lachnospirales;Lachnospiraceae;Roseburia;uncultured_bacterium	Firmicutes	Clostridia	Lachnospirales	Lachnospiraceae	Roseburia	uncultured_bacterium
33ded88f729397b5703316d10679b4c5	482	Bacteria;Firmicutes;Clostridia;Lachnospirales;Lachnospiraceae;Lachnospiraceae_NK4A136_group;uncultured_bacterium	Firmicutes	Clostridia	Lachnospirales	Lachnospiraceae	Lachnospiraceae_NK4A136_group	uncultured_bacterium
33efcce1bd9e9b1d1a533919242bb831	360	Bacteria;Bacteroidota;Bacteroidia;Bacteroidales;Muribaculaceae;Muribaculaceae;uncultured_bacterium	Bacteroidota	Bacteroidia	Bacteroidales	Muribaculaceae	Muribaculaceae	uncultured_bacterium
33f0622b2119518e971816aeba5a1398	360	Bacteria;Bacteroidota;Bacteroidia;Bacteroidales;Muribaculaceae;Muribaculaceae;uncultured_bacterium	Bacteroidota	Bacteroidia	Bacteroidales	Muribaculaceae	Muribaculaceae	uncultured_bacterium
34058075e178956c260164a905f76d11	434	Bacteria;Firmicutes;Clostridia;Clostridia_UCG-014;Clostridia_UCG-014;Clostridia_UCG-014;uncultured_bacterium	Firmicutes	Clostridia	Clostridia_UCG-014	Clostridia_UCG-014	Clostridia_UCG-014	uncultured_bacterium
340a342acae5582329ccbd7bb54ce9eb	411	Bacteria;Firmicutes;Bacilli;Lactobacillales;Lactobacillaceae;Lactobacillus;uncultured_bacterium	Firmicutes	Bacilli	Lactobacillales	Lactobacillaceae	Lactobacillus	uncultured_bacterium
34109a56028ddf395cb598d40f2cec85	500	Bacteria;Firmicutes;Clostridia;Lachnospirales;Lachnospiraceae;uncultured;uncultured_bacterium	Firmicutes	Clostridia	Lachnospirales	Lachnospiraceae	uncultured	uncultured_bacterium
3418ffc20317afb24491072b0143a23b	360	Bacteria;Bacteroidota;Bacteroidia;Bacteroidales;Muribaculaceae;Muribaculaceae;uncultured_bacterium	Bacteroidota	Bacteroidia	Bacteroidales	Muribaculaceae	Muribaculaceae	uncultured_bacterium
341b306356bbae6825220fb815c70c89	505	Bacteria;Firmicutes;Clostridia;Oscillospirales;Butyricicoccaceae;Butyricicoccus;uncultured_bacterium	Firmicutes	Clostridia	Oscillospirales	Butyricicoccaceae	Butyricicoccus	uncultured_bacterium
3428a4424ceaeffbb82a1a8e4b1c97b5	549	Bacteria;Firmicutes;Clostridia;Peptococcales;Peptococcaceae;uncultured;uncultured_bacterium	Firmicutes	Clostridia	Peptococcales	Peptococcaceae	uncultured	uncultured_bacterium
342ae317e71ef6bf16be8c70acc95d47	498	Bacteria;Firmicutes;Clostridia;Lachnospirales;Lachnospiraceae;__;__	Firmicutes	Clostridia	Lachnospirales	Lachnospiraceae
344ed4d0f819a85eae450b00b33e9669	482	Bacteria;Firmicutes;Clostridia;Lachnospirales;Lachnospiraceae;Lachnospiraceae_NK4A136_group;uncultured_bacterium	Firmicutes	Clostridia	Lachnospirales	Lachnospiraceae	Lachnospiraceae_NK4A136_group	uncultured_bacterium
34537838c10d0d0f010d8007e35c538a	438	Bacteria;Firmicutes;Clostridia;Clostridia_vadinBB60_group;Clostridia_vadinBB60_group;Clostridia_vadinBB60_group;uncultured_bacterium	Firmicutes	Clostridia	Clostridia_vadinBB60_group	Clostridia_vadinBB60_group	Clostridia_vadinBB60_group	uncultured_bacterium
348c23d13f998b424bdfded4522b9596	504	Bacteria;Firmicutes;Clostridia;Oscillospirales;[Eubacterium]_coprostanoligenes_group;[Eubacterium]_coprostanoligenes_group;uncultured_bacterium	Firmicutes	Clostridia	Oscillospirales	[Eubacterium]_coprostanoligenes_group	[Eubacterium]_coprostanoligenes_group	uncultured_bacterium
3492b0ca39c905ca1842b9dbf3aedef2	504	Bacteria;Firmicutes;Clostridia;Oscillospirales;[Eubacterium]_coprostanoligenes_group;[Eubacterium]_coprostanoligenes_group;uncultured_bacterium	Firmicutes	Clostridia	Oscillospirales	[Eubacterium]_coprostanoligenes_group	[Eubacterium]_coprostanoligenes_group	uncultured_bacterium
349c09c5a401b47d2840a3d2fdf03533	360	Bacteria;Bacteroidota;Bacteroidia;Bacteroidales;Muribaculaceae;Muribaculaceae;uncultured_bacterium	Bacteroidota	Bacteroidia	Bacteroidales	Muribaculaceae	Muribaculaceae	uncultured_bacterium
34a33587615b4fc39fbe3877cbdbb60d	523	Bacteria;Firmicutes;Clostridia;Oscillospirales;Oscillospiraceae;uncultured;uncultured_bacterium	Firmicutes	Clostridia	Oscillospirales	Oscillospiraceae	uncultured	uncultured_bacterium
34a8113e7cbde3ca126a5fed2904ef8b	482	Bacteria;Firmicutes;Clostridia;Lachnospirales;Lachnospiraceae;Lachnospiraceae_NK4A136_group;uncultured_bacterium	Firmicutes	Clostridia	Lachnospirales	Lachnospiraceae	Lachnospiraceae_NK4A136_group	uncultured_bacterium
34ab7e789df2b58476670c7e02da9afb	360	Bacteria;Bacteroidota;Bacteroidia;Bacteroidales;Muribaculaceae;Muribaculaceae;uncultured_bacterium	Bacteroidota	Bacteroidia	Bacteroidales	Muribaculaceae	Muribaculaceae	uncultured_bacterium
34c330131e810acd1bd1def0b77bf500	377	Bacteria;Desulfobacterota;Desulfovibrionia;Desulfovibrionales;Desulfovibrionaceae;Desulfovibrio;uncultured_bacterium	Desulfobacterota	Desulfovibrionia	Desulfovibrionales	Desulfovibrionaceae	Desulfovibrio	uncultured_bacterium
34cf3a65ea57ccee0bd5cd2b59571128	376	Bacteria;Desulfobacterota;Desulfovibrionia;Desulfovibrionales;Desulfovibrionaceae;Desulfovibrio;__	Desulfobacterota	Desulfovibrionia	Desulfovibrionales	Desulfovibrionaceae	Desulfovibrio
34d4a61a1c8f22a7b7724d11ca089104	509	Bacteria;Firmicutes;Clostridia;Oscillospirales;Oscillospiraceae;Colidextribacter;uncultured_bacterium	Firmicutes	Clostridia	Oscillospirales	Oscillospiraceae	Colidextribacter	uncultured_bacterium
34e2a85bc211cc880cc04fdd54221eac	418	Bacteria;Firmicutes;Bacilli;RF39;RF39;RF39;__	Firmicutes	Bacilli	RF39	RF39	RF39
34fbb41bfb295d91dc6b7f0f856e9a7b	500	Bacteria;Firmicutes;Clostridia;Lachnospirales;Lachnospiraceae;uncultured;uncultured_bacterium	Firmicutes	Clostridia	Lachnospirales	Lachnospiraceae	uncultured	uncultured_bacterium
34fc1a29b11abf8812957b0b891ebbd0	498	Bacteria;Firmicutes;Clostridia;Lachnospirales;Lachnospiraceae;__;__	Firmicutes	Clostridia	Lachnospirales	Lachnospiraceae
34fe5c6adefb4a70f7a39e114bf4688d	376	Bacteria;Desulfobacterota;Desulfovibrionia;Desulfovibrionales;Desulfovibrionaceae;Desulfovibrio;__	Desulfobacterota	Desulfovibrionia	Desulfovibrionales	Desulfovibrionaceae	Desulfovibrio
34fe930f737367b25d1a9185c44ee403	486	Bacteria;Firmicutes;Clostridia;Lachnospirales;Lachnospiraceae;Lachnospiraceae_UCG-001;uncultured_bacterium	Firmicutes	Clostridia	Lachnospirales	Lachnospiraceae	Lachnospiraceae_UCG-001	uncultured_bacterium
34fe93a05d70afff2d45505ed3dc7afe	434	Bacteria;Firmicutes;Clostridia;Clostridia_UCG-014;Clostridia_UCG-014;Clostridia_UCG-014;uncultured_bacterium	Firmicutes	Clostridia	Clostridia_UCG-014	Clostridia_UCG-014	Clostridia_UCG-014	uncultured_bacterium
352e47b3a6c79e87e1df2aee673da4b1	360	Bacteria;Bacteroidota;Bacteroidia;Bacteroidales;Muribaculaceae;Muribaculaceae;uncultured_bacterium	Bacteroidota	Bacteroidia	Bacteroidales	Muribaculaceae	Muribaculaceae	uncultured_bacterium
35486fd0f671c482586e92591c213e8f	534	Bacteria;Firmicutes;Clostridia;Oscillospirales;Ruminococcaceae;Incertae_Sedis;uncultured_bacterium	Firmicutes	Clostridia	Oscillospirales	Ruminococcaceae	Incertae_Sedis	uncultured_bacterium
354db8543d223a224cb5ed3b896e79e2	463	Bacteria;Firmicutes;Clostridia;Lachnospirales;Lachnospiraceae;Blautia;uncultured_bacterium	Firmicutes	Clostridia	Lachnospirales	Lachnospiraceae	Blautia	uncultured_bacterium
354e9dfc660bd4beea441d517d02d6ac	473	Bacteria;Firmicutes;Clostridia;Lachnospirales;Lachnospiraceae;Lachnoclostridium;uncultured_bacterium	Firmicutes	Clostridia	Lachnospirales	Lachnospiraceae	Lachnoclostridium	uncultured_bacterium
35552b1e6457dcb14bb37bcc881b732e	555	Bacteria;Firmicutes;Clostridia;Peptostreptococcales-Tissierellales;Anaerovoracaceae;Family_XIII_AD3011_group;uncultured_bacterium	Firmicutes	Clostridia	Peptostreptococcales-Tissierellales	Anaerovoracaceae	Family_XIII_AD3011_group	uncultured_bacterium
3555c88f6d3dfe1796dfa3f396f3b7b4	500	Bacteria;Firmicutes;Clostridia;Lachnospirales;Lachnospiraceae;uncultured;uncultured_bacterium	Firmicutes	Clostridia	Lachnospirales	Lachnospiraceae	uncultured	uncultured_bacterium
35695dda3000a9759a3cf0a5ae6d411e	516	Bacteria;Firmicutes;Clostridia;Oscillospirales;Oscillospiraceae;UCG-003;uncultured_bacterium	Firmicutes	Clostridia	Oscillospirales	Oscillospiraceae	UCG-003	uncultured_bacterium
356b1dcdd55aa87f0a32e61e23c728df	523	Bacteria;Firmicutes;Clostridia;Oscillospirales;Oscillospiraceae;uncultured;uncultured_bacterium	Firmicutes	Clostridia	Oscillospirales	Oscillospiraceae	uncultured	uncultured_bacterium
3578705e19d74977ac24f1f8b1920a92	471	Bacteria;Firmicutes;Clostridia;Lachnospirales;Lachnospiraceae;GCA-900066575;uncultured_bacterium	Firmicutes	Clostridia	Lachnospirales	Lachnospiraceae	GCA-900066575	uncultured_bacterium
35835befe95bf1108ddaaeb90e8a60bc	438	Bacteria;Firmicutes;Clostridia;Clostridia_vadinBB60_group;Clostridia_vadinBB60_group;Clostridia_vadinBB60_group;uncultured_bacterium	Firmicutes	Clostridia	Clostridia_vadinBB60_group	Clostridia_vadinBB60_group	Clostridia_vadinBB60_group	uncultured_bacterium
3586057dcafc17a3c7c2f4babf7b63a3	482	Bacteria;Firmicutes;Clostridia;Lachnospirales;Lachnospiraceae;Lachnospiraceae_NK4A136_group;uncultured_bacterium	Firmicutes	Clostridia	Lachnospirales	Lachnospiraceae	Lachnospiraceae_NK4A136_group	uncultured_bacterium
358981546a0eabad91227d246ed87784	559	Bacteria;Firmicutes;Clostridia;__;__;__;__	Firmicutes	Clostridia
358eaf15c02fac52af5f898da9927940	493	Bacteria;Firmicutes;Clostridia;Lachnospirales;Lachnospiraceae;Roseburia;uncultured_bacterium	Firmicutes	Clostridia	Lachnospirales	Lachnospiraceae	Roseburia	uncultured_bacterium
359b6983db1858f659bcc0f488cb7911	493	Bacteria;Firmicutes;Clostridia;Lachnospirales;Lachnospiraceae;Roseburia;uncultured_bacterium	Firmicutes	Clostridia	Lachnospirales	Lachnospiraceae	Roseburia	uncultured_bacterium
35a7f91a4c5dd9ff00245c92915720ac	505	Bacteria;Firmicutes;Clostridia;Oscillospirales;Butyricicoccaceae;Butyricicoccus;uncultured_bacterium	Firmicutes	Clostridia	Oscillospirales	Butyricicoccaceae	Butyricicoccus	uncultured_bacterium
35ad482f61673ca905954d64e28e27d5	447	Bacteria;Firmicutes;Clostridia;Lachnospirales;Lachnospiraceae;[Eubacterium]_xylanophilum_group;uncultured_bacterium	Firmicutes	Clostridia	Lachnospirales	Lachnospiraceae	[Eubacterium]_xylanophilum_group	uncultured_bacterium
35c35c93236023e8a71185c22b45bf6c	482	Bacteria;Firmicutes;Clostridia;Lachnospirales;Lachnospiraceae;Lachnospiraceae_NK4A136_group;uncultured_bacterium	Firmicutes	Clostridia	Lachnospirales	Lachnospiraceae	Lachnospiraceae_NK4A136_group	uncultured_bacterium
35d8c599caa6a8b145a1884dd1830614	434	Bacteria;Firmicutes;Clostridia;Clostridia_UCG-014;Clostridia_UCG-014;Clostridia_UCG-014;uncultured_bacterium	Firmicutes	Clostridia	Clostridia_UCG-014	Clostridia_UCG-014	Clostridia_UCG-014	uncultured_bacterium
35e7396a72725202b6cf8872497a318a	509	Bacteria;Firmicutes;Clostridia;Oscillospirales;Oscillospiraceae;Colidextribacter;uncultured_bacterium	Firmicutes	Clostridia	Oscillospirales	Oscillospiraceae	Colidextribacter	uncultured_bacterium
362265ca09e566850c6863664b793d4f	509	Bacteria;Firmicutes;Clostridia;Oscillospirales;Oscillospiraceae;Colidextribacter;uncultured_bacterium	Firmicutes	Clostridia	Oscillospirales	Oscillospiraceae	Colidextribacter	uncultured_bacterium
364a82804d4cda668cc3be45d2067783	360	Bacteria;Bacteroidota;Bacteroidia;Bacteroidales;Muribaculaceae;Muribaculaceae;uncultured_bacterium	Bacteroidota	Bacteroidia	Bacteroidales	Muribaculaceae	Muribaculaceae	uncultured_bacterium
364ece647e0e83545d4bb5004ca60575	482	Bacteria;Firmicutes;Clostridia;Lachnospirales;Lachnospiraceae;Lachnospiraceae_NK4A136_group;uncultured_bacterium	Firmicutes	Clostridia	Lachnospirales	Lachnospiraceae	Lachnospiraceae_NK4A136_group	uncultured_bacterium
3655088046e7f52640c378d5cf80c704	493	Bacteria;Firmicutes;Clostridia;Lachnospirales;Lachnospiraceae;Roseburia;uncultured_bacterium	Firmicutes	Clostridia	Lachnospirales	Lachnospiraceae	Roseburia	uncultured_bacterium
366759b67cfb948c994e1fd11ebf0795	543	Bacteria;Firmicutes;Clostridia;Oscillospirales;Ruminococcaceae;uncultured;__	Firmicutes	Clostridia	Oscillospirales	Ruminococcaceae	uncultured
367d94e7fb53ca4c1835c1fda34251a4	473	Bacteria;Firmicutes;Clostridia;Lachnospirales;Lachnospiraceae;Lachnoclostridium;uncultured_bacterium	Firmicutes	Clostridia	Lachnospirales	Lachnospiraceae	Lachnoclostridium	uncultured_bacterium
367f3e47d6e7ef6778860feafd2298f4	438	Bacteria;Firmicutes;Clostridia;Clostridia_vadinBB60_group;Clostridia_vadinBB60_group;Clostridia_vadinBB60_group;uncultured_bacterium	Firmicutes	Clostridia	Clostridia_vadinBB60_group	Clostridia_vadinBB60_group	Clostridia_vadinBB60_group	uncultured_bacterium
3684deee216b51c0f1052d59597cc8b4	447	Bacteria;Firmicutes;Clostridia;Lachnospirales;Lachnospiraceae;[Eubacterium]_xylanophilum_group;uncultured_bacterium	Firmicutes	Clostridia	Lachnospirales	Lachnospiraceae	[Eubacterium]_xylanophilum_group	uncultured_bacterium
3685990d96e8646a25f7e19ce7e250a5	500	Bacteria;Firmicutes;Clostridia;Lachnospirales;Lachnospiraceae;uncultured;uncultured_bacterium	Firmicutes	Clostridia	Lachnospirales	Lachnospiraceae	uncultured	uncultured_bacterium
368e740dcd888aa1116d36ba062610c3	542	Bacteria;Firmicutes;Clostridia;Oscillospirales;Ruminococcaceae;__;__	Firmicutes	Clostridia	Oscillospirales	Ruminococcaceae
36a64f01c1ad32f7a848def2dbc5479b	419	Bacteria;Firmicutes;Bacilli;RF39;RF39;RF39;uncultured_bacterium	Firmicutes	Bacilli	RF39	RF39	RF39	uncultured_bacterium
36a98308691cfaaf4316d0e63d1785e8	438	Bacteria;Firmicutes;Clostridia;Clostridia_vadinBB60_group;Clostridia_vadinBB60_group;Clostridia_vadinBB60_group;uncultured_bacterium	Firmicutes	Clostridia	Clostridia_vadinBB60_group	Clostridia_vadinBB60_group	Clostridia_vadinBB60_group	uncultured_bacterium
36ae4123ba1a4708bc6b05be4a544324	509	Bacteria;Firmicutes;Clostridia;Oscillospirales;Oscillospiraceae;Colidextribacter;uncultured_bacterium	Firmicutes	Clostridia	Oscillospirales	Oscillospiraceae	Colidextribacter	uncultured_bacterium
36b9f32e316d95140f9177c465b48b3c	362	Bacteria;Bacteroidota;Bacteroidia;Bacteroidales;Rikenellaceae;Alistipes;uncultured_bacterium	Bacteroidota	Bacteroidia	Bacteroidales	Rikenellaceae	Alistipes	uncultured_bacterium
36c385622903248e620f9167de51b972	500	Bacteria;Firmicutes;Clostridia;Lachnospirales;Lachnospiraceae;uncultured;uncultured_bacterium	Firmicutes	Clostridia	Lachnospirales	Lachnospiraceae	uncultured	uncultured_bacterium
36c463b954eff7daabf051403e1bbb96	500	Bacteria;Firmicutes;Clostridia;Lachnospirales;Lachnospiraceae;uncultured;uncultured_bacterium	Firmicutes	Clostridia	Lachnospirales	Lachnospiraceae	uncultured	uncultured_bacterium
36e36d04e37041315bb3534ddefb360f	544	Bacteria;Firmicutes;Clostridia;Oscillospirales;Ruminococcaceae;uncultured;uncultured_bacterium	Firmicutes	Clostridia	Oscillospirales	Ruminococcaceae	uncultured	uncultured_bacterium
36e984bb0e1498e8a4b5e9a0cd26c453	434	Bacteria;Firmicutes;Clostridia;Clostridia_UCG-014;Clostridia_UCG-014;Clostridia_UCG-014;uncultured_bacterium	Firmicutes	Clostridia	Clostridia_UCG-014	Clostridia_UCG-014	Clostridia_UCG-014	uncultured_bacterium
36efe2375b47426e6fbb9dd642b95688	458	Bacteria;Firmicutes;Clostridia;Lachnospirales;Lachnospiraceae;Anaerostignum;__	Firmicutes	Clostridia	Lachnospirales	Lachnospiraceae	Anaerostignum
36fa6f6e7045efd483389655e2afef4b	482	Bacteria;Firmicutes;Clostridia;Lachnospirales;Lachnospiraceae;Lachnospiraceae_NK4A136_group;uncultured_bacterium	Firmicutes	Clostridia	Lachnospirales	Lachnospiraceae	Lachnospiraceae_NK4A136_group	uncultured_bacterium
37041269b2b29bdf9d54aa19af530ac4	438	Bacteria;Firmicutes;Clostridia;Clostridia_vadinBB60_group;Clostridia_vadinBB60_group;Clostridia_vadinBB60_group;uncultured_bacterium	Firmicutes	Clostridia	Clostridia_vadinBB60_group	Clostridia_vadinBB60_group	Clostridia_vadinBB60_group	uncultured_bacterium
370c36a4f037019a586fff948be36333	360	Bacteria;Bacteroidota;Bacteroidia;Bacteroidales;Muribaculaceae;Muribaculaceae;uncultured_bacterium	Bacteroidota	Bacteroidia	Bacteroidales	Muribaculaceae	Muribaculaceae	uncultured_bacterium
3738f8bbd180720c609b601869dd4b40	438	Bacteria;Firmicutes;Clostridia;Clostridia_vadinBB60_group;Clostridia_vadinBB60_group;Clostridia_vadinBB60_group;uncultured_bacterium	Firmicutes	Clostridia	Clostridia_vadinBB60_group	Clostridia_vadinBB60_group	Clostridia_vadinBB60_group	uncultured_bacterium
3739a1379b1ef40b9d854bcad9348701	500	Bacteria;Firmicutes;Clostridia;Lachnospirales;Lachnospiraceae;uncultured;uncultured_bacterium	Firmicutes	Clostridia	Lachnospirales	Lachnospiraceae	uncultured	uncultured_bacterium
37418d2c40a72fb476465208dda58f43	526	Bacteria;Firmicutes;Clostridia;Oscillospirales;Ruminococcaceae;[Eubacterium]_siraeum_group;uncultured_bacterium	Firmicutes	Clostridia	Oscillospirales	Ruminococcaceae	[Eubacterium]_siraeum_group	uncultured_bacterium
374746befb3cfafd4290ef9ebc14339f	360	Bacteria;Bacteroidota;Bacteroidia;Bacteroidales;Muribaculaceae;Muribaculaceae;uncultured_bacterium	Bacteroidota	Bacteroidia	Bacteroidales	Muribaculaceae	Muribaculaceae	uncultured_bacterium
3756e4d70b6b2133bfae7363fd91a15f	415	Bacteria;Firmicutes;Bacilli;Lactobacillales;Streptococcaceae;Streptococcus;__	Firmicutes	Bacilli	Lactobacillales	Streptococcaceae	Streptococcus
375b8fe6967f06923c6337bdd832c5fe	482	Bacteria;Firmicutes;Clostridia;Lachnospirales;Lachnospiraceae;Lachnospiraceae_NK4A136_group;uncultured_bacterium	Firmicutes	Clostridia	Lachnospirales	Lachnospiraceae	Lachnospiraceae_NK4A136_group	uncultured_bacterium
375f6be708b0fc611174380918674ad0	544	Bacteria;Firmicutes;Clostridia;Oscillospirales;Ruminococcaceae;uncultured;uncultured_bacterium	Firmicutes	Clostridia	Oscillospirales	Ruminococcaceae	uncultured	uncultured_bacterium
37628fad573694b3bbdc00bc3b16072f	523	Bacteria;Firmicutes;Clostridia;Oscillospirales;Oscillospiraceae;uncultured;uncultured_bacterium	Firmicutes	Clostridia	Oscillospirales	Oscillospiraceae	uncultured	uncultured_bacterium
3778eda40bff033febaa22c724ff5de4	523	Bacteria;Firmicutes;Clostridia;Oscillospirales;Oscillospiraceae;uncultured;uncultured_bacterium	Firmicutes	Clostridia	Oscillospirales	Oscillospiraceae	uncultured	uncultured_bacterium
3797614d513bf5ffddaa3070fe06a132	377	Bacteria;Desulfobacterota;Desulfovibrionia;Desulfovibrionales;Desulfovibrionaceae;Desulfovibrio;uncultured_bacterium	Desulfobacterota	Desulfovibrionia	Desulfovibrionales	Desulfovibrionaceae	Desulfovibrio	uncultured_bacterium
37a9da71e04b8edf4028738923e0e2cf	500	Bacteria;Firmicutes;Clostridia;Lachnospirales;Lachnospiraceae;uncultured;uncultured_bacterium	Firmicutes	Clostridia	Lachnospirales	Lachnospiraceae	uncultured	uncultured_bacterium
37b74d8399a370fe0dcaf8fa52b964c6	495	Bacteria;Firmicutes;Clostridia;Lachnospirales;Lachnospiraceae;Tyzzerella;__	Firmicutes	Clostridia	Lachnospirales	Lachnospiraceae	Tyzzerella
37b7b203a567f8f5be9db2bf8378fa36	429	Bacteria;Firmicutes;Clostridia;Christensenellales;Christensenellaceae;__;__	Firmicutes	Clostridia	Christensenellales	Christensenellaceae
37da39faeb6a2e6771f123100a675f60	537	Bacteria;Firmicutes;Clostridia;Oscillospirales;Ruminococcaceae;Ruminococcaceae;uncultured_bacterium	Firmicutes	Clostridia	Oscillospirales	Ruminococcaceae	Ruminococcaceae	uncultured_bacterium
37e57219388199ca225a07a35638977c	482	Bacteria;Firmicutes;Clostridia;Lachnospirales;Lachnospiraceae;Lachnospiraceae_NK4A136_group;uncultured_bacterium	Firmicutes	Clostridia	Lachnospirales	Lachnospiraceae	Lachnospiraceae_NK4A136_group	uncultured_bacterium
37fab2dade349321ac3f09182bee5e6e	542	Bacteria;Firmicutes;Clostridia;Oscillospirales;Ruminococcaceae;__;__	Firmicutes	Clostridia	Oscillospirales	Ruminococcaceae
38037ec189c48c24acdb5e46df835128	360	Bacteria;Bacteroidota;Bacteroidia;Bacteroidales;Muribaculaceae;Muribaculaceae;uncultured_bacterium	Bacteroidota	Bacteroidia	Bacteroidales	Muribaculaceae	Muribaculaceae	uncultured_bacterium
381e4cec248d891992393eaa14856781	368	Bacteria;Cyanobacteria;Vampirivibrionia;Gastranaerophilales;Gastranaerophilales;Gastranaerophilales;__	Cyanobacteria	Vampirivibrionia	Gastranaerophilales	Gastranaerophilales	Gastranaerophilales
3828c0f1523f62b16f7d1aa6e5434bff	523	Bacteria;Firmicutes;Clostridia;Oscillospirales;Oscillospiraceae;uncultured;uncultured_bacterium	Firmicutes	Clostridia	Oscillospirales	Oscillospiraceae	uncultured	uncultured_bacterium
382d23e095c0575a78cb9256d7577112	482	Bacteria;Firmicutes;Clostridia;Lachnospirales;Lachnospiraceae;Lachnospiraceae_NK4A136_group;uncultured_bacterium	Firmicutes	Clostridia	Lachnospirales	Lachnospiraceae	Lachnospiraceae_NK4A136_group	uncultured_bacterium
382ea13ba63287480150f1c726824913	521	Bacteria;Firmicutes;Clostridia;Oscillospirales;Oscillospiraceae;__;__	Firmicutes	Clostridia	Oscillospirales	Oscillospiraceae
383660e6ab808681dfb3e55bed26547e	550	Bacteria;Firmicutes;Clostridia;Peptostreptococcales-Tissierellales;Anaerovoracaceae;[Eubacterium]_brachy_group;uncultured_bacterium	Firmicutes	Clostridia	Peptostreptococcales-Tissierellales	Anaerovoracaceae	[Eubacterium]_brachy_group	uncultured_bacterium
383d40f53dd108e3dbe458972bb83fce	360	Bacteria;Bacteroidota;Bacteroidia;Bacteroidales;Muribaculaceae;Muribaculaceae;uncultured_bacterium	Bacteroidota	Bacteroidia	Bacteroidales	Muribaculaceae	Muribaculaceae	uncultured_bacterium
385e41df87f6e59f8c7e9cd0995e755f	500	Bacteria;Firmicutes;Clostridia;Lachnospirales;Lachnospiraceae;uncultured;uncultured_bacterium	Firmicutes	Clostridia	Lachnospirales	Lachnospiraceae	uncultured	uncultured_bacterium
38623c483a60bbfc6eeefa2614838fdb	572	Bacteria;Proteobacteria;Alphaproteobacteria;Rhodospirillales;uncultured;uncultured;uncultured_bacterium	Proteobacteria	Alphaproteobacteria	Rhodospirillales	uncultured	uncultured	uncultured_bacterium
38792bd96824632e0dc5bf772b90f376	498	Bacteria;Firmicutes;Clostridia;Lachnospirales;Lachnospiraceae;__;__	Firmicutes	Clostridia	Lachnospirales	Lachnospiraceae
38847f9ff13f61853d6cf703a872dbfc	419	Bacteria;Firmicutes;Bacilli;RF39;RF39;RF39;uncultured_bacterium	Firmicutes	Bacilli	RF39	RF39	RF39	uncultured_bacterium
3886c567baed7c322a6d71a1d68f0393	493	Bacteria;Firmicutes;Clostridia;Lachnospirales;Lachnospiraceae;Roseburia;uncultured_bacterium	Firmicutes	Clostridia	Lachnospirales	Lachnospiraceae	Roseburia	uncultured_bacterium
38b3f9f452dd9b44e03479941069e383	452	Bacteria;Firmicutes;Clostridia;Lachnospirales;Lachnospiraceae;A2;uncultured_bacterium	Firmicutes	Clostridia	Lachnospirales	Lachnospiraceae	A2	uncultured_bacterium
38d40a4998606a7400fc389f9ec1a88e	473	Bacteria;Firmicutes;Clostridia;Lachnospirales;Lachnospiraceae;Lachnoclostridium;uncultured_bacterium	Firmicutes	Clostridia	Lachnospirales	Lachnospiraceae	Lachnoclostridium	uncultured_bacterium
38dbf2d6beefd80efcb6d2dfcc47ff05	523	Bacteria;Firmicutes;Clostridia;Oscillospirales;Oscillospiraceae;uncultured;uncultured_bacterium	Firmicutes	Clostridia	Oscillospirales	Oscillospiraceae	uncultured	uncultured_bacterium
38e0996d74481617e683123ca09b65b0	486	Bacteria;Firmicutes;Clostridia;Lachnospirales;Lachnospiraceae;Lachnospiraceae_UCG-001;uncultured_bacterium	Firmicutes	Clostridia	Lachnospirales	Lachnospiraceae	Lachnospiraceae_UCG-001	uncultured_bacterium
38e0f91be12618263f044348abe28b04	482	Bacteria;Firmicutes;Clostridia;Lachnospirales;Lachnospiraceae;Lachnospiraceae_NK4A136_group;uncultured_bacterium	Firmicutes	Clostridia	Lachnospirales	Lachnospiraceae	Lachnospiraceae_NK4A136_group	uncultured_bacterium
38e5dae2eff5fecae209e7bd9ae0d727	544	Bacteria;Firmicutes;Clostridia;Oscillospirales;Ruminococcaceae;uncultured;uncultured_bacterium	Firmicutes	Clostridia	Oscillospirales	Ruminococcaceae	uncultured	uncultured_bacterium
38ec2a5c77b9aa2582f169255e75b8cd	523	Bacteria;Firmicutes;Clostridia;Oscillospirales;Oscillospiraceae;uncultured;uncultured_bacterium	Firmicutes	Clostridia	Oscillospirales	Oscillospiraceae	uncultured	uncultured_bacterium
3908a6956b85146149501ca693ef7b96	437	Bacteria;Firmicutes;Clostridia;Clostridia_vadinBB60_group;Clostridia_vadinBB60_group;Clostridia_vadinBB60_group;__	Firmicutes	Clostridia	Clostridia_vadinBB60_group	Clostridia_vadinBB60_group	Clostridia_vadinBB60_group
390b2569deac8b2afe1c3b0589eebf0c	482	Bacteria;Firmicutes;Clostridia;Lachnospirales;Lachnospiraceae;Lachnospiraceae_NK4A136_group;uncultured_bacterium	Firmicutes	Clostridia	Lachnospirales	Lachnospiraceae	Lachnospiraceae_NK4A136_group	uncultured_bacterium
391051f5749aac5721336ac10a6b0f76	523	Bacteria;Firmicutes;Clostridia;Oscillospirales;Oscillospiraceae;uncultured;uncultured_bacterium	Firmicutes	Clostridia	Oscillospirales	Oscillospiraceae	uncultured	uncultured_bacterium
392a500d751f6725e7740b233babb9f2	360	Bacteria;Bacteroidota;Bacteroidia;Bacteroidales;Muribaculaceae;Muribaculaceae;uncultured_bacterium	Bacteroidota	Bacteroidia	Bacteroidales	Muribaculaceae	Muribaculaceae	uncultured_bacterium
394689a0b54517fe311047cd90fa9db0	534	Bacteria;Firmicutes;Clostridia;Oscillospirales;Ruminococcaceae;Incertae_Sedis;uncultured_bacterium	Firmicutes	Clostridia	Oscillospirales	Ruminococcaceae	Incertae_Sedis	uncultured_bacterium
394cc47ae2b83c3299bcfbfa963a4d0b	482	Bacteria;Firmicutes;Clostridia;Lachnospirales;Lachnospiraceae;Lachnospiraceae_NK4A136_group;uncultured_bacterium	Firmicutes	Clostridia	Lachnospirales	Lachnospiraceae	Lachnospiraceae_NK4A136_group	uncultured_bacterium
397f8d63e838209e3eabefea2584c3a8	544	Bacteria;Firmicutes;Clostridia;Oscillospirales;Ruminococcaceae;uncultured;uncultured_bacterium	Firmicutes	Clostridia	Oscillospirales	Ruminococcaceae	uncultured	uncultured_bacterium
3981936ceb362a1d13eee5fc9432e027	438	Bacteria;Firmicutes;Clostridia;Clostridia_vadinBB60_group;Clostridia_vadinBB60_group;Clostridia_vadinBB60_group;uncultured_bacterium	Firmicutes	Clostridia	Clostridia_vadinBB60_group	Clostridia_vadinBB60_group	Clostridia_vadinBB60_group	uncultured_bacterium
398283c8a64f16556900add04e953af8	369	Bacteria;Cyanobacteria;Vampirivibrionia;Gastranaerophilales;Gastranaerophilales;Gastranaerophilales;uncultured_bacterium	Cyanobacteria	Vampirivibrionia	Gastranaerophilales	Gastranaerophilales	Gastranaerophilales	uncultured_bacterium
3982ee6df702354ed71bfbf2c6568705	533	Bacteria;Firmicutes;Clostridia;Oscillospirales;Ruminococcaceae;Incertae_Sedis;__	Firmicutes	Clostridia	Oscillospirales	Ruminococcaceae	Incertae_Sedis
399a86b08de7789a03b054f41166cac0	498	Bacteria;Firmicutes;Clostridia;Lachnospirales;Lachnospiraceae;__;__	Firmicutes	Clostridia	Lachnospirales	Lachnospiraceae
39b291ea89541a55a14b18b6243c5ff8	523	Bacteria;Firmicutes;Clostridia;Oscillospirales;Oscillospiraceae;uncultured;uncultured_bacterium	Firmicutes	Clostridia	Oscillospirales	Oscillospiraceae	uncultured	uncultured_bacterium
39b3c7c7ac53dacebd5f28d771b58d9f	360	Bacteria;Bacteroidota;Bacteroidia;Bacteroidales;Muribaculaceae;Muribaculaceae;uncultured_bacterium	Bacteroidota	Bacteroidia	Bacteroidales	Muribaculaceae	Muribaculaceae	uncultured_bacterium
39bbdb615c89f1819d2b3d390040b1b5	434	Bacteria;Firmicutes;Clostridia;Clostridia_UCG-014;Clostridia_UCG-014;Clostridia_UCG-014;uncultured_bacterium	Firmicutes	Clostridia	Clostridia_UCG-014	Clostridia_UCG-014	Clostridia_UCG-014	uncultured_bacterium
39bd47e7d69bb04b32ce12cc93aa95bd	500	Bacteria;Firmicutes;Clostridia;Lachnospirales;Lachnospiraceae;uncultured;uncultured_bacterium	Firmicutes	Clostridia	Lachnospirales	Lachnospiraceae	uncultured	uncultured_bacterium
39bf6f1e8cc23018f0f56bdd11453567	523	Bacteria;Firmicutes;Clostridia;Oscillospirales;Oscillospiraceae;uncultured;uncultured_bacterium	Firmicutes	Clostridia	Oscillospirales	Oscillospiraceae	uncultured	uncultured_bacterium
39d8a3366834d3abe96f98c3647cdffb	498	Bacteria;Firmicutes;Clostridia;Lachnospirales;Lachnospiraceae;__;__	Firmicutes	Clostridia	Lachnospirales	Lachnospiraceae
39e040e8909e976ee34ad22e62e1e784	482	Bacteria;Firmicutes;Clostridia;Lachnospirales;Lachnospiraceae;Lachnospiraceae_NK4A136_group;uncultured_bacterium	Firmicutes	Clostridia	Lachnospirales	Lachnospiraceae	Lachnospiraceae_NK4A136_group	uncultured_bacterium
39eb4219221f61e55d5ca40ef8e6b9ca	482	Bacteria;Firmicutes;Clostridia;Lachnospirales;Lachnospiraceae;Lachnospiraceae_NK4A136_group;uncultured_bacterium	Firmicutes	Clostridia	Lachnospirales	Lachnospiraceae	Lachnospiraceae_NK4A136_group	uncultured_bacterium
39f2f44b22e4d97d8c3c0a257870e1c0	381	Bacteria;Desulfobacterota;Desulfovibrionia;Desulfovibrionales;__;__;__	Desulfobacterota	Desulfovibrionia	Desulfovibrionales
3a1b85c09527f136f588c1c6eb43cbe4	493	Bacteria;Firmicutes;Clostridia;Lachnospirales;Lachnospiraceae;Roseburia;uncultured_bacterium	Firmicutes	Clostridia	Lachnospirales	Lachnospiraceae	Roseburia	uncultured_bacterium
3a2231f96d4a06520734d723b05b86e7	544	Bacteria;Firmicutes;Clostridia;Oscillospirales;Ruminococcaceae;uncultured;uncultured_bacterium	Firmicutes	Clostridia	Oscillospirales	Ruminococcaceae	uncultured	uncultured_bacterium
3a28a73384366fca756aa85592133d1b	428	Bacteria;Firmicutes;Clostridia;Christensenellales;Christensenellaceae;Christensenellaceae_R-7_group;uncultured_bacterium	Firmicutes	Clostridia	Christensenellales	Christensenellaceae	Christensenellaceae_R-7_group	uncultured_bacterium
3a387014535ac02e7f6b382133821ad3	498	Bacteria;Firmicutes;Clostridia;Lachnospirales;Lachnospiraceae;__;__	Firmicutes	Clostridia	Lachnospirales	Lachnospiraceae
3a6438b8bddd6c3708bb7ba6b2d25198	500	Bacteria;Firmicutes;Clostridia;Lachnospirales;Lachnospiraceae;uncultured;uncultured_bacterium	Firmicutes	Clostridia	Lachnospirales	Lachnospiraceae	uncultured	uncultured_bacterium
3a752c94eee753786bdfbf7affd486ca	430	Bacteria;Firmicutes;Clostridia;Christensenellales;Christensenellaceae;uncultured;__	Firmicutes	Clostridia	Christensenellales	Christensenellaceae	uncultured
3a8b28764f7996766a6afc9c36e79e76	499	Bacteria;Firmicutes;Clostridia;Lachnospirales;Lachnospiraceae;uncultured;__	Firmicutes	Clostridia	Lachnospirales	Lachnospiraceae	uncultured
3a8d8e60c9e8b70311f8c9f493622bbc	377	Bacteria;Desulfobacterota;Desulfovibrionia;Desulfovibrionales;Desulfovibrionaceae;Desulfovibrio;uncultured_bacterium	Desulfobacterota	Desulfovibrionia	Desulfovibrionales	Desulfovibrionaceae	Desulfovibrio	uncultured_bacterium
3a8fee568b9e9cb5e28f5bacd0cb6d50	526	Bacteria;Firmicutes;Clostridia;Oscillospirales;Ruminococcaceae;[Eubacterium]_siraeum_group;uncultured_bacterium	Firmicutes	Clostridia	Oscillospirales	Ruminococcaceae	[Eubacterium]_siraeum_group	uncultured_bacterium
3aa67f5517d1be276efd8c934927a2ba	438	Bacteria;Firmicutes;Clostridia;Clostridia_vadinBB60_group;Clostridia_vadinBB60_group;Clostridia_vadinBB60_group;uncultured_bacterium	Firmicutes	Clostridia	Clostridia_vadinBB60_group	Clostridia_vadinBB60_group	Clostridia_vadinBB60_group	uncultured_bacterium
3ab25346892448ff23c8d0dc0805d121	500	Bacteria;Firmicutes;Clostridia;Lachnospirales;Lachnospiraceae;uncultured;uncultured_bacterium	Firmicutes	Clostridia	Lachnospirales	Lachnospiraceae	uncultured	uncultured_bacterium
3ab2c3ada116a45cb54efaed1de2ebd2	411	Bacteria;Firmicutes;Bacilli;Lactobacillales;Lactobacillaceae;Lactobacillus;uncultured_bacterium	Firmicutes	Bacilli	Lactobacillales	Lactobacillaceae	Lactobacillus	uncultured_bacterium
3ad1626b13efb64ef79e9ce3ec26c3bb	500	Bacteria;Firmicutes;Clostridia;Lachnospirales;Lachnospiraceae;uncultured;uncultured_bacterium	Firmicutes	Clostridia	Lachnospirales	Lachnospiraceae	uncultured	uncultured_bacterium
3ad7e6dab9e408c3c5e39ebe8098881d	387	Bacteria;Firmicutes;Bacilli;Bacillales;Planococcaceae;__;__	Firmicutes	Bacilli	Bacillales	Planococcaceae
3addad9d34e9788da057f656b9282776	523	Bacteria;Firmicutes;Clostridia;Oscillospirales;Oscillospiraceae;uncultured;uncultured_bacterium	Firmicutes	Clostridia	Oscillospirales	Oscillospiraceae	uncultured	uncultured_bacterium
3ae98e5ce3b219ec6dae98796c40ccff	464	Bacteria;Firmicutes;Clostridia;Lachnospirales;Lachnospiraceae;Butyrivibrio;__	Firmicutes	Clostridia	Lachnospirales	Lachnospiraceae	Butyrivibrio
3afdffdcba6b2ac0fbef3c8067c5785f	504	Bacteria;Firmicutes;Clostridia;Oscillospirales;[Eubacterium]_coprostanoligenes_group;[Eubacterium]_coprostanoligenes_group;uncultured_bacterium	Firmicutes	Clostridia	Oscillospirales	[Eubacterium]_coprostanoligenes_group	[Eubacterium]_coprostanoligenes_group	uncultured_bacterium
3b08b55c50f22fcf7052253215e91d59	500	Bacteria;Firmicutes;Clostridia;Lachnospirales;Lachnospiraceae;uncultured;uncultured_bacterium	Firmicutes	Clostridia	Lachnospirales	Lachnospiraceae	uncultured	uncultured_bacterium
3b10199e9f789b8850fe0dc225994b1e	523	Bacteria;Firmicutes;Clostridia;Oscillospirales;Oscillospiraceae;uncultured;uncultured_bacterium	Firmicutes	Clostridia	Oscillospirales	Oscillospiraceae	uncultured	uncultured_bacterium
3b32219471e62134a45180c23eaf4c73	498	Bacteria;Firmicutes;Clostridia;Lachnospirales;Lachnospiraceae;__;__	Firmicutes	Clostridia	Lachnospirales	Lachnospiraceae
3b38bc2521720ce57c49bf285b5ca2d2	523	Bacteria;Firmicutes;Clostridia;Oscillospirales;Oscillospiraceae;uncultured;uncultured_bacterium	Firmicutes	Clostridia	Oscillospirales	Oscillospiraceae	uncultured	uncultured_bacterium
3b4569e84f9e4e7b12e4de0640846cc3	487	Bacteria;Firmicutes;Clostridia;Lachnospirales;Lachnospiraceae;Lachnospiraceae_UCG-006;uncultured_bacterium	Firmicutes	Clostridia	Lachnospirales	Lachnospiraceae	Lachnospiraceae_UCG-006	uncultured_bacterium
3b45e594b8c61ad78f8ffecaec4e0bbc	500	Bacteria;Firmicutes;Clostridia;Lachnospirales;Lachnospiraceae;uncultured;uncultured_bacterium	Firmicutes	Clostridia	Lachnospirales	Lachnospiraceae	uncultured	uncultured_bacterium
3b485c9ad93ccc4647eaa59085cef173	534	Bacteria;Firmicutes;Clostridia;Oscillospirales;Ruminococcaceae;Incertae_Sedis;uncultured_bacterium	Firmicutes	Clostridia	Oscillospirales	Ruminococcaceae	Incertae_Sedis	uncultured_bacterium
3b4edeaae671c78b97c4c22b434a7e9d	544	Bacteria;Firmicutes;Clostridia;Oscillospirales;Ruminococcaceae;uncultured;uncultured_bacterium	Firmicutes	Clostridia	Oscillospirales	Ruminococcaceae	uncultured	uncultured_bacterium
3b56422fb64634a5b8153dea365b6b97	419	Bacteria;Firmicutes;Bacilli;RF39;RF39;RF39;uncultured_bacterium	Firmicutes	Bacilli	RF39	RF39	RF39	uncultured_bacterium
3b58eee4fc68a03f10a1786afec25609	471	Bacteria;Firmicutes;Clostridia;Lachnospirales;Lachnospiraceae;GCA-900066575;uncultured_bacterium	Firmicutes	Clostridia	Lachnospirales	Lachnospiraceae	GCA-900066575	uncultured_bacterium
3b5d563d01eb0fedb61b1f971ad5bba1	482	Bacteria;Firmicutes;Clostridia;Lachnospirales;Lachnospiraceae;Lachnospiraceae_NK4A136_group;uncultured_bacterium	Firmicutes	Clostridia	Lachnospirales	Lachnospiraceae	Lachnospiraceae_NK4A136_group	uncultured_bacterium
3b609620c0048896da2d8221df839330	523	Bacteria;Firmicutes;Clostridia;Oscillospirales;Oscillospiraceae;uncultured;uncultured_bacterium	Firmicutes	Clostridia	Oscillospirales	Oscillospiraceae	uncultured	uncultured_bacterium
3b62f6c06c487c255f34d346cf581f91	482	Bacteria;Firmicutes;Clostridia;Lachnospirales;Lachnospiraceae;Lachnospiraceae_NK4A136_group;uncultured_bacterium	Firmicutes	Clostridia	Lachnospirales	Lachnospiraceae	Lachnospiraceae_NK4A136_group	uncultured_bacterium
3b77c1ec3577c10cd8249670eca60561	463	Bacteria;Firmicutes;Clostridia;Lachnospirales;Lachnospiraceae;Blautia;uncultured_bacterium	Firmicutes	Clostridia	Lachnospirales	Lachnospiraceae	Blautia	uncultured_bacterium
3b89d0acbb8851cfb01b19263191c89e	498	Bacteria;Firmicutes;Clostridia;Lachnospirales;Lachnospiraceae;__;__	Firmicutes	Clostridia	Lachnospirales	Lachnospiraceae
3baadf49dd51d008c459c1bedb3d9efe	482	Bacteria;Firmicutes;Clostridia;Lachnospirales;Lachnospiraceae;Lachnospiraceae_NK4A136_group;uncultured_bacterium	Firmicutes	Clostridia	Lachnospirales	Lachnospiraceae	Lachnospiraceae_NK4A136_group	uncultured_bacterium
3bb807841afa6e1b64e4e59decab9206	351	Bacteria;Actinobacteriota;Coriobacteriia;Coriobacteriales;Eggerthellaceae;Enterorhabdus;uncultured_bacterium	Actinobacteriota	Coriobacteriia	Coriobacteriales	Eggerthellaceae	Enterorhabdus	uncultured_bacterium
3bdcf4cbb0a73430c441acf680eed6f4	438	Bacteria;Firmicutes;Clostridia;Clostridia_vadinBB60_group;Clostridia_vadinBB60_group;Clostridia_vadinBB60_group;uncultured_bacterium	Firmicutes	Clostridia	Clostridia_vadinBB60_group	Clostridia_vadinBB60_group	Clostridia_vadinBB60_group	uncultured_bacterium
3be61dc57375b8c507787da8f5f98906	434	Bacteria;Firmicutes;Clostridia;Clostridia_UCG-014;Clostridia_UCG-014;Clostridia_UCG-014;uncultured_bacterium	Firmicutes	Clostridia	Clostridia_UCG-014	Clostridia_UCG-014	Clostridia_UCG-014	uncultured_bacterium
3be66486758ab6b2b336d5c6e3473853	482	Bacteria;Firmicutes;Clostridia;Lachnospirales;Lachnospiraceae;Lachnospiraceae_NK4A136_group;uncultured_bacterium	Firmicutes	Clostridia	Lachnospirales	Lachnospiraceae	Lachnospiraceae_NK4A136_group	uncultured_bacterium
3be6769bdec1f901fe8a677351dc6d3b	500	Bacteria;Firmicutes;Clostridia;Lachnospirales;Lachnospiraceae;uncultured;uncultured_bacterium	Firmicutes	Clostridia	Lachnospirales	Lachnospiraceae	uncultured	uncultured_bacterium
3bf01610c061e006a3b852b50a03e9b5	493	Bacteria;Firmicutes;Clostridia;Lachnospirales;Lachnospiraceae;Roseburia;uncultured_bacterium	Firmicutes	Clostridia	Lachnospirales	Lachnospiraceae	Roseburia	uncultured_bacterium
3c0777aca8c904d931b5c864723bde91	516	Bacteria;Firmicutes;Clostridia;Oscillospirales;Oscillospiraceae;UCG-003;uncultured_bacterium	Firmicutes	Clostridia	Oscillospirales	Oscillospiraceae	UCG-003	uncultured_bacterium
3c0b5f70986e1e4fbd3f9bdc9a99328b	486	Bacteria;Firmicutes;Clostridia;Lachnospirales;Lachnospiraceae;Lachnospiraceae_UCG-001;uncultured_bacterium	Firmicutes	Clostridia	Lachnospirales	Lachnospiraceae	Lachnospiraceae_UCG-001	uncultured_bacterium
3c0e5ee364d8e552a5032e05f7f091e4	360	Bacteria;Bacteroidota;Bacteroidia;Bacteroidales;Muribaculaceae;Muribaculaceae;uncultured_bacterium	Bacteroidota	Bacteroidia	Bacteroidales	Muribaculaceae	Muribaculaceae	uncultured_bacterium
3c21a1240060e866bdb3b317b8b70fa5	516	Bacteria;Firmicutes;Clostridia;Oscillospirales;Oscillospiraceae;UCG-003;uncultured_bacterium	Firmicutes	Clostridia	Oscillospirales	Oscillospiraceae	UCG-003	uncultured_bacterium
3c2e5244ea3273019c6fe9e4c5a17b42	493	Bacteria;Firmicutes;Clostridia;Lachnospirales;Lachnospiraceae;Roseburia;uncultured_bacterium	Firmicutes	Clostridia	Lachnospirales	Lachnospiraceae	Roseburia	uncultured_bacterium
3c41bdfcd45251aef8659346310f81ff	418	Bacteria;Firmicutes;Bacilli;RF39;RF39;RF39;__	Firmicutes	Bacilli	RF39	RF39	RF39
3c430a0156d207d640110ef54f688dac	351	Bacteria;Actinobacteriota;Coriobacteriia;Coriobacteriales;Eggerthellaceae;Enterorhabdus;uncultured_bacterium	Actinobacteriota	Coriobacteriia	Coriobacteriales	Eggerthellaceae	Enterorhabdus	uncultured_bacterium
3c4a3afbbcb9a569eeb38bb970389763	523	Bacteria;Firmicutes;Clostridia;Oscillospirales;Oscillospiraceae;uncultured;uncultured_bacterium	Firmicutes	Clostridia	Oscillospirales	Oscillospiraceae	uncultured	uncultured_bacterium
3c57c3d94d588aa6fd5bf4b71645a209	377	Bacteria;Desulfobacterota;Desulfovibrionia;Desulfovibrionales;Desulfovibrionaceae;Desulfovibrio;uncultured_bacterium	Desulfobacterota	Desulfovibrionia	Desulfovibrionales	Desulfovibrionaceae	Desulfovibrio	uncultured_bacterium
3c5ca061be3a0f90617d925e780fd7cf	363	Bacteria;Bacteroidota;Bacteroidia;Bacteroidales;Rikenellaceae;Rikenella;__	Bacteroidota	Bacteroidia	Bacteroidales	Rikenellaceae	Rikenella
3c60f35dc02f20999309fb38e2f7d6b7	482	Bacteria;Firmicutes;Clostridia;Lachnospirales;Lachnospiraceae;Lachnospiraceae_NK4A136_group;uncultured_bacterium	Firmicutes	Clostridia	Lachnospirales	Lachnospiraceae	Lachnospiraceae_NK4A136_group	uncultured_bacterium
3c64dc11eab3b7c77e8dc146ba180352	463	Bacteria;Firmicutes;Clostridia;Lachnospirales;Lachnospiraceae;Blautia;uncultured_bacterium	Firmicutes	Clostridia	Lachnospirales	Lachnospiraceae	Blautia	uncultured_bacterium
3c70b3570be99f82e88267cb68a3cf26	473	Bacteria;Firmicutes;Clostridia;Lachnospirales;Lachnospiraceae;Lachnoclostridium;uncultured_bacterium	Firmicutes	Clostridia	Lachnospirales	Lachnospiraceae	Lachnoclostridium	uncultured_bacterium
3c72a2f69ff488f77387c87893db8fbe	498	Bacteria;Firmicutes;Clostridia;Lachnospirales;Lachnospiraceae;__;__	Firmicutes	Clostridia	Lachnospirales	Lachnospiraceae
3c7ef304d17da9a06e5e00306054c9a0	471	Bacteria;Firmicutes;Clostridia;Lachnospirales;Lachnospiraceae;GCA-900066575;uncultured_bacterium	Firmicutes	Clostridia	Lachnospirales	Lachnospiraceae	GCA-900066575	uncultured_bacterium
3c83662b7679588e683c2f7658f3fd01	377	Bacteria;Desulfobacterota;Desulfovibrionia;Desulfovibrionales;Desulfovibrionaceae;Desulfovibrio;uncultured_bacterium	Desulfobacterota	Desulfovibrionia	Desulfovibrionales	Desulfovibrionaceae	Desulfovibrio	uncultured_bacterium
3c88014159a9cd1e5309af74d0803e13	542	Bacteria;Firmicutes;Clostridia;Oscillospirales;Ruminococcaceae;__;__	Firmicutes	Clostridia	Oscillospirales	Ruminococcaceae
3c963bbf13630a133a29d2f8d0a7ad01	360	Bacteria;Bacteroidota;Bacteroidia;Bacteroidales;Muribaculaceae;Muribaculaceae;uncultured_bacterium	Bacteroidota	Bacteroidia	Bacteroidales	Muribaculaceae	Muribaculaceae	uncultured_bacterium
3c9cc28270d3f037619a74aa135c2e8e	482	Bacteria;Firmicutes;Clostridia;Lachnospirales;Lachnospiraceae;Lachnospiraceae_NK4A136_group;uncultured_bacterium	Firmicutes	Clostridia	Lachnospirales	Lachnospiraceae	Lachnospiraceae_NK4A136_group	uncultured_bacterium
3ca977764e7edf9ce1a1a9910f4608db	351	Bacteria;Actinobacteriota;Coriobacteriia;Coriobacteriales;Eggerthellaceae;Enterorhabdus;uncultured_bacterium	Actinobacteriota	Coriobacteriia	Coriobacteriales	Eggerthellaceae	Enterorhabdus	uncultured_bacterium
3cc75cc39a80889610d77410c50fa052	471	Bacteria;Firmicutes;Clostridia;Lachnospirales;Lachnospiraceae;GCA-900066575;uncultured_bacterium	Firmicutes	Clostridia	Lachnospirales	Lachnospiraceae	GCA-900066575	uncultured_bacterium
3ccfc7dd0d73d3475a1a243cf8ee243d	513	Bacteria;Firmicutes;Clostridia;Oscillospirales;Oscillospiraceae;Oscillibacter;uncultured_bacterium	Firmicutes	Clostridia	Oscillospirales	Oscillospiraceae	Oscillibacter	uncultured_bacterium
3cd573a00d2d34375f53c941ef5af8e5	523	Bacteria;Firmicutes;Clostridia;Oscillospirales;Oscillospiraceae;uncultured;uncultured_bacterium	Firmicutes	Clostridia	Oscillospirales	Oscillospiraceae	uncultured	uncultured_bacterium
3ce37f63e41307c08a9f835b24acabfb	500	Bacteria;Firmicutes;Clostridia;Lachnospirales;Lachnospiraceae;uncultured;uncultured_bacterium	Firmicutes	Clostridia	Lachnospirales	Lachnospiraceae	uncultured	uncultured_bacterium
3ce63bdf1c05f8be2c3a9e83bc225d34	541	Bacteria;Firmicutes;Clostridia;Oscillospirales;Ruminococcaceae;UBA1819;uncultured_organism	Firmicutes	Clostridia	Oscillospirales	Ruminococcaceae	UBA1819	uncultured_organism
3cef7c6252e2044e4b0d29bd87b9669d	463	Bacteria;Firmicutes;Clostridia;Lachnospirales;Lachnospiraceae;Blautia;uncultured_bacterium	Firmicutes	Clostridia	Lachnospirales	Lachnospiraceae	Blautia	uncultured_bacterium
3cfd18a392b5b8fc67fcca2f09bfa517	482	Bacteria;Firmicutes;Clostridia;Lachnospirales;Lachnospiraceae;Lachnospiraceae_NK4A136_group;uncultured_bacterium	Firmicutes	Clostridia	Lachnospirales	Lachnospiraceae	Lachnospiraceae_NK4A136_group	uncultured_bacterium
3d03f3ad338d81d23a6bd94bde4fa438	376	Bacteria;Desulfobacterota;Desulfovibrionia;Desulfovibrionales;Desulfovibrionaceae;Desulfovibrio;__	Desulfobacterota	Desulfovibrionia	Desulfovibrionales	Desulfovibrionaceae	Desulfovibrio
3d1b858f611fc3e808eb5106f4071e05	351	Bacteria;Actinobacteriota;Coriobacteriia;Coriobacteriales;Eggerthellaceae;Enterorhabdus;uncultured_bacterium	Actinobacteriota	Coriobacteriia	Coriobacteriales	Eggerthellaceae	Enterorhabdus	uncultured_bacterium
3d1d882b682036e350b6c614d2bcc914	493	Bacteria;Firmicutes;Clostridia;Lachnospirales;Lachnospiraceae;Roseburia;uncultured_bacterium	Firmicutes	Clostridia	Lachnospirales	Lachnospiraceae	Roseburia	uncultured_bacterium
3d1fb0234c6e84d12eac3421c580ac79	438	Bacteria;Firmicutes;Clostridia;Clostridia_vadinBB60_group;Clostridia_vadinBB60_group;Clostridia_vadinBB60_group;uncultured_bacterium	Firmicutes	Clostridia	Clostridia_vadinBB60_group	Clostridia_vadinBB60_group	Clostridia_vadinBB60_group	uncultured_bacterium
3d2e23d62e9b72cb05acf0001d68020c	416	Bacteria;Firmicutes;Bacilli;Lactobacillales;Streptococcaceae;Streptococcus;uncultured_bacterium	Firmicutes	Bacilli	Lactobacillales	Streptococcaceae	Streptococcus	uncultured_bacterium
3d38137c7985205270367f135773fa1b	523	Bacteria;Firmicutes;Clostridia;Oscillospirales;Oscillospiraceae;uncultured;uncultured_bacterium	Firmicutes	Clostridia	Oscillospirales	Oscillospiraceae	uncultured	uncultured_bacterium
3d508a638a68890fe7e8c4283af1e6c6	482	Bacteria;Firmicutes;Clostridia;Lachnospirales;Lachnospiraceae;Lachnospiraceae_NK4A136_group;uncultured_bacterium	Firmicutes	Clostridia	Lachnospirales	Lachnospiraceae	Lachnospiraceae_NK4A136_group	uncultured_bacterium
3d60eede69c05e9fea1bb9ed503e4de1	518	Bacteria;Firmicutes;Clostridia;Oscillospirales;Oscillospiraceae;UCG-005;uncultured_bacterium	Firmicutes	Clostridia	Oscillospirales	Oscillospiraceae	UCG-005	uncultured_bacterium
3d65c336411fe6a207dba9240fa85cc9	364	Bacteria;Bacteroidota;Bacteroidia;Bacteroidales;Rs-E47_termite_group;Rs-E47_termite_group;__	Bacteroidota	Bacteroidia	Bacteroidales	Rs-E47_termite_group	Rs-E47_termite_group
3d7326a2450b295f1b172a23198945d1	360	Bacteria;Bacteroidota;Bacteroidia;Bacteroidales;Muribaculaceae;Muribaculaceae;uncultured_bacterium	Bacteroidota	Bacteroidia	Bacteroidales	Muribaculaceae	Muribaculaceae	uncultured_bacterium
3d740ca8a07875adbc0ba9d9ed1e2a5d	376	Bacteria;Desulfobacterota;Desulfovibrionia;Desulfovibrionales;Desulfovibrionaceae;Desulfovibrio;__	Desulfobacterota	Desulfovibrionia	Desulfovibrionales	Desulfovibrionaceae	Desulfovibrio
3d84c2636e8e7136cee3b713b3d2f2f8	521	Bacteria;Firmicutes;Clostridia;Oscillospirales;Oscillospiraceae;__;__	Firmicutes	Clostridia	Oscillospirales	Oscillospiraceae
3d84f86feb207ee31fe1be45aaab2f6d	512	Bacteria;Firmicutes;Clostridia;Oscillospirales;Oscillospiraceae;NK4A214_group;uncultured_bacterium	Firmicutes	Clostridia	Oscillospirales	Oscillospiraceae	NK4A214_group	uncultured_bacterium
3d9f3b736b125cab9d4758b153896369	438	Bacteria;Firmicutes;Clostridia;Clostridia_vadinBB60_group;Clostridia_vadinBB60_group;Clostridia_vadinBB60_group;uncultured_bacterium	Firmicutes	Clostridia	Clostridia_vadinBB60_group	Clostridia_vadinBB60_group	Clostridia_vadinBB60_group	uncultured_bacterium
3dacd79eb9751719288857d4676d2e5d	496	Bacteria;Firmicutes;Clostridia;Lachnospirales;Lachnospiraceae;Tyzzerella;uncultured_bacterium	Firmicutes	Clostridia	Lachnospirales	Lachnospiraceae	Tyzzerella	uncultured_bacterium
3db225ee815dc75846f6d6d38de4c280	486	Bacteria;Firmicutes;Clostridia;Lachnospirales;Lachnospiraceae;Lachnospiraceae_UCG-001;uncultured_bacterium	Firmicutes	Clostridia	Lachnospirales	Lachnospiraceae	Lachnospiraceae_UCG-001	uncultured_bacterium
3db3fb1d75a2b47f7af3547f0842e2ba	500	Bacteria;Firmicutes;Clostridia;Lachnospirales;Lachnospiraceae;uncultured;uncultured_bacterium	Firmicutes	Clostridia	Lachnospirales	Lachnospiraceae	uncultured	uncultured_bacterium
3db607dd1fb7242f40d6f99693a784bf	360	Bacteria;Bacteroidota;Bacteroidia;Bacteroidales;Muribaculaceae;Muribaculaceae;uncultured_bacterium	Bacteroidota	Bacteroidia	Bacteroidales	Muribaculaceae	Muribaculaceae	uncultured_bacterium
3dc501e0c36c2886679d5ce52c2ad14a	438	Bacteria;Firmicutes;Clostridia;Clostridia_vadinBB60_group;Clostridia_vadinBB60_group;Clostridia_vadinBB60_group;uncultured_bacterium	Firmicutes	Clostridia	Clostridia_vadinBB60_group	Clostridia_vadinBB60_group	Clostridia_vadinBB60_group	uncultured_bacterium
3dccae553748c78e018bd2182df436dd	473	Bacteria;Firmicutes;Clostridia;Lachnospirales;Lachnospiraceae;Lachnoclostridium;uncultured_bacterium	Firmicutes	Clostridia	Lachnospirales	Lachnospiraceae	Lachnoclostridium	uncultured_bacterium
3dd31b5734a5243bf24e2ba4c05122f6	498	Bacteria;Firmicutes;Clostridia;Lachnospirales;Lachnospiraceae;__;__	Firmicutes	Clostridia	Lachnospirales	Lachnospiraceae
3de215e71c8f3ad418df6c3421b23a9a	509	Bacteria;Firmicutes;Clostridia;Oscillospirales;Oscillospiraceae;Colidextribacter;uncultured_bacterium	Firmicutes	Clostridia	Oscillospirales	Oscillospiraceae	Colidextribacter	uncultured_bacterium
3dec316cd5090fea931869bad35da85a	360	Bacteria;Bacteroidota;Bacteroidia;Bacteroidales;Muribaculaceae;Muribaculaceae;uncultured_bacterium	Bacteroidota	Bacteroidia	Bacteroidales	Muribaculaceae	Muribaculaceae	uncultured_bacterium
3decc74f95d7ca53df3835ba5e92b176	377	Bacteria;Desulfobacterota;Desulfovibrionia;Desulfovibrionales;Desulfovibrionaceae;Desulfovibrio;uncultured_bacterium	Desulfobacterota	Desulfovibrionia	Desulfovibrionales	Desulfovibrionaceae	Desulfovibrio	uncultured_bacterium
3e0ece7d49b06fa9a94acfe4249d7cad	513	Bacteria;Firmicutes;Clostridia;Oscillospirales;Oscillospiraceae;Oscillibacter;uncultured_bacterium	Firmicutes	Clostridia	Oscillospirales	Oscillospiraceae	Oscillibacter	uncultured_bacterium
3e1d09f099f8af334e0a0515722909e6	523	Bacteria;Firmicutes;Clostridia;Oscillospirales;Oscillospiraceae;uncultured;uncultured_bacterium	Firmicutes	Clostridia	Oscillospirales	Oscillospiraceae	uncultured	uncultured_bacterium
3e2caaf942087cab1e8539719f666828	372	Bacteria;Deferribacterota;Deferribacteres;Deferribacterales;Deferribacteraceae;Mucispirillum;uncultured_bacterium	Deferribacterota	Deferribacteres	Deferribacterales	Deferribacteraceae	Mucispirillum	uncultured_bacterium
3e5855268b8468907d5f8bd673c50eaf	496	Bacteria;Firmicutes;Clostridia;Lachnospirales;Lachnospiraceae;Tyzzerella;uncultured_bacterium	Firmicutes	Clostridia	Lachnospirales	Lachnospiraceae	Tyzzerella	uncultured_bacterium
3e70957f57d6e2f41ba4c2cbefc52eba	544	Bacteria;Firmicutes;Clostridia;Oscillospirales;Ruminococcaceae;uncultured;uncultured_bacterium	Firmicutes	Clostridia	Oscillospirales	Ruminococcaceae	uncultured	uncultured_bacterium
3e7c8fe6f77be6232cba6851b9102403	486	Bacteria;Firmicutes;Clostridia;Lachnospirales;Lachnospiraceae;Lachnospiraceae_UCG-001;uncultured_bacterium	Firmicutes	Clostridia	Lachnospirales	Lachnospiraceae	Lachnospiraceae_UCG-001	uncultured_bacterium
3e89dfe50aa661fb9393c048ee7a70f2	356	Bacteria;Bacteroidota;Bacteroidia;Bacteroidales;F082;F082;__	Bacteroidota	Bacteroidia	Bacteroidales	F082	F082
3e8a73c7f92cf11925d8fc5ece731c62	500	Bacteria;Firmicutes;Clostridia;Lachnospirales;Lachnospiraceae;uncultured;uncultured_bacterium	Firmicutes	Clostridia	Lachnospirales	Lachnospiraceae	uncultured	uncultured_bacterium
3ea91da894ebc61a893a4cd92f46d653	523	Bacteria;Firmicutes;Clostridia;Oscillospirales;Oscillospiraceae;uncultured;uncultured_bacterium	Firmicutes	Clostridia	Oscillospirales	Oscillospiraceae	uncultured	uncultured_bacterium
3eabb162a97c8518f10521f43258cb94	362	Bacteria;Bacteroidota;Bacteroidia;Bacteroidales;Rikenellaceae;Alistipes;uncultured_bacterium	Bacteroidota	Bacteroidia	Bacteroidales	Rikenellaceae	Alistipes	uncultured_bacterium
3eb8d0d507cb3298b74a3dbc5afe7c30	397	Bacteria;Firmicutes;Bacilli;Erysipelotrichales;Erysipelotrichaceae;Ileibacterium;__	Firmicutes	Bacilli	Erysipelotrichales	Erysipelotrichaceae	Ileibacterium
3eb92a9d9a96b11caa4d5f8e928f2bfc	463	Bacteria;Firmicutes;Clostridia;Lachnospirales;Lachnospiraceae;Blautia;uncultured_bacterium	Firmicutes	Clostridia	Lachnospirales	Lachnospiraceae	Blautia	uncultured_bacterium
3ec4f88ef55c7990611e5bb0e6062b16	544	Bacteria;Firmicutes;Clostridia;Oscillospirales;Ruminococcaceae;uncultured;uncultured_bacterium	Firmicutes	Clostridia	Oscillospirales	Ruminococcaceae	uncultured	uncultured_bacterium
3eda41cace4d4bbfa1550a68114e563b	498	Bacteria;Firmicutes;Clostridia;Lachnospirales;Lachnospiraceae;__;__	Firmicutes	Clostridia	Lachnospirales	Lachnospiraceae
3ef4f4ab293c7a556ccbb7aff866fc4d	434	Bacteria;Firmicutes;Clostridia;Clostridia_UCG-014;Clostridia_UCG-014;Clostridia_UCG-014;uncultured_bacterium	Firmicutes	Clostridia	Clostridia_UCG-014	Clostridia_UCG-014	Clostridia_UCG-014	uncultured_bacterium
3f033794a47740b30190fa37e7707b04	375	Bacteria;Desulfobacterota;Desulfovibrionia;Desulfovibrionales;Desulfovibrionaceae;Desulfovibrio;Desulfovibrio_hydrothermalis	Desulfobacterota	Desulfovibrionia	Desulfovibrionales	Desulfovibrionaceae	Desulfovibrio	Desulfovibrio_hydrothermalis
3f1589a6fa37bc41d63a630e3e7b5079	360	Bacteria;Bacteroidota;Bacteroidia;Bacteroidales;Muribaculaceae;Muribaculaceae;uncultured_bacterium	Bacteroidota	Bacteroidia	Bacteroidales	Muribaculaceae	Muribaculaceae	uncultured_bacterium
3f2401a8a307715c49c3cc4f85cafcb9	471	Bacteria;Firmicutes;Clostridia;Lachnospirales;Lachnospiraceae;GCA-900066575;uncultured_bacterium	Firmicutes	Clostridia	Lachnospirales	Lachnospiraceae	GCA-900066575	uncultured_bacterium
3f2ed1e12ab9a19acfa640f1b4afdabc	486	Bacteria;Firmicutes;Clostridia;Lachnospirales;Lachnospiraceae;Lachnospiraceae_UCG-001;uncultured_bacterium	Firmicutes	Clostridia	Lachnospirales	Lachnospiraceae	Lachnospiraceae_UCG-001	uncultured_bacterium
3f329da163c1fc8e615139840eba56ff	544	Bacteria;Firmicutes;Clostridia;Oscillospirales;Ruminococcaceae;uncultured;uncultured_bacterium	Firmicutes	Clostridia	Oscillospirales	Ruminococcaceae	uncultured	uncultured_bacterium
3f36de63467d938de3a98ce3a7f9e7ac	360	Bacteria;Bacteroidota;Bacteroidia;Bacteroidales;Muribaculaceae;Muribaculaceae;uncultured_bacterium	Bacteroidota	Bacteroidia	Bacteroidales	Muribaculaceae	Muribaculaceae	uncultured_bacterium
3f3bb2ecac8b2f4723449ddb9081cf2e	442	Bacteria;Firmicutes;Clostridia;Eubacteriales;Anaerofustaceae;Anaerofustis;__	Firmicutes	Clostridia	Eubacteriales	Anaerofustaceae	Anaerofustis
3f3e07c55698e89dd36d84d0053fc7b3	360	Bacteria;Bacteroidota;Bacteroidia;Bacteroidales;Muribaculaceae;Muribaculaceae;uncultured_bacterium	Bacteroidota	Bacteroidia	Bacteroidales	Muribaculaceae	Muribaculaceae	uncultured_bacterium
3f42b7b6a1e17de8c705774822745be5	471	Bacteria;Firmicutes;Clostridia;Lachnospirales;Lachnospiraceae;GCA-900066575;uncultured_bacterium	Firmicutes	Clostridia	Lachnospirales	Lachnospiraceae	GCA-900066575	uncultured_bacterium
3f516b5014f5b7fd886b78af1d2ea85b	523	Bacteria;Firmicutes;Clostridia;Oscillospirales;Oscillospiraceae;uncultured;uncultured_bacterium	Firmicutes	Clostridia	Oscillospirales	Oscillospiraceae	uncultured	uncultured_bacterium
3f541f46eecee1621064dfa470d1e6a5	498	Bacteria;Firmicutes;Clostridia;Lachnospirales;Lachnospiraceae;__;__	Firmicutes	Clostridia	Lachnospirales	Lachnospiraceae
3f579a7057420fdc54e3c61328fbd80c	360	Bacteria;Bacteroidota;Bacteroidia;Bacteroidales;Muribaculaceae;Muribaculaceae;uncultured_bacterium	Bacteroidota	Bacteroidia	Bacteroidales	Muribaculaceae	Muribaculaceae	uncultured_bacterium
3f7345b78bcef8f9d47a45b5c85a8cc1	482	Bacteria;Firmicutes;Clostridia;Lachnospirales;Lachnospiraceae;Lachnospiraceae_NK4A136_group;uncultured_bacterium	Firmicutes	Clostridia	Lachnospirales	Lachnospiraceae	Lachnospiraceae_NK4A136_group	uncultured_bacterium
3f74e7d65cde42e0c6ecc8bcd198ca02	526	Bacteria;Firmicutes;Clostridia;Oscillospirales;Ruminococcaceae;[Eubacterium]_siraeum_group;uncultured_bacterium	Firmicutes	Clostridia	Oscillospirales	Ruminococcaceae	[Eubacterium]_siraeum_group	uncultured_bacterium
3f753768eb721ccd6ec82e5a60d6d62c	482	Bacteria;Firmicutes;Clostridia;Lachnospirales;Lachnospiraceae;Lachnospiraceae_NK4A136_group;uncultured_bacterium	Firmicutes	Clostridia	Lachnospirales	Lachnospiraceae	Lachnospiraceae_NK4A136_group	uncultured_bacterium
3f7a17d9d26bf4133d50ac01e841712f	434	Bacteria;Firmicutes;Clostridia;Clostridia_UCG-014;Clostridia_UCG-014;Clostridia_UCG-014;uncultured_bacterium	Firmicutes	Clostridia	Clostridia_UCG-014	Clostridia_UCG-014	Clostridia_UCG-014	uncultured_bacterium
3f7c5065967edc4bb03fdda082e2b369	445	Bacteria;Firmicutes;Clostridia;Lachnospirales;Lachnospiraceae;[Eubacterium]_oxidoreducens_group;uncultured_bacterium	Firmicutes	Clostridia	Lachnospirales	Lachnospiraceae	[Eubacterium]_oxidoreducens_group	uncultured_bacterium
3f7cb6669f84b5c63d368a7faa118631	360	Bacteria;Bacteroidota;Bacteroidia;Bacteroidales;Muribaculaceae;Muribaculaceae;uncultured_bacterium	Bacteroidota	Bacteroidia	Bacteroidales	Muribaculaceae	Muribaculaceae	uncultured_bacterium
[truncated: 3,905 more rows]

## Sheet: ASV_Individual_AbsAbund_Matrix
	IRWn	1126	1128	1160	1213	1264	1269	1270	1271	1275	1284	1287	1288	1289	1298	1300	1312	1326	1328	1329	1330	1331	1338	1339	1348	1349	1352	1381	1385	1386	1388	1400	1403	1413	1416	1417	1420	1433	1434	1436	1457	1459	1460	1477	1478	1490	1507	1508	1513
[truncated: 5,231 more rows]
[truncated: 697 more columns]
