# Supplementary material for: Experimental evolution of a mammalian holobiont: selection for herbivorous capability in bank voles yields distinct and robust gut microbial communities
Source: Research Square preprint supplement (doi:10.21203/rs.3.rs-4765186/v1), 2024-08-05
Supplement: Supplementary file 3 [file e8033cdc9a002a4ab9150571.xlsx]

## Sheet: info_exp
Data for project presented in "Experimental evolution of a mammalian holobiont: selection for herbivorous capability in bank voles yields distinct and robust gut microbial communities"
by Małgorzata M. Lipowska, Edyta T. Sadowska, Kevin D. Kohl, Paweł Koteja
Project performed within the long-term artificial selection experiment on bank voles
Aim of the project: studying the effects of selection for herbivorous capability on the vole's gut microbiome and its association with performance in the selection trial
Cohabitation experiment - animals allowed horizontal microbial transfer with an unrelated individual
generation 27 of the selection experiment
	data from microbiome project - effect of cohabitation
	animals from C and H lines, both sexes
parturition to cohabitation
	famillies kept in regular breeding cages
	pups raised by birth mother, with sire present for majority of cases
	cage changed to a fresh one at the age of 10 days
	animals weaned to standard cages at the age of 17 days
	animals marked by fur shaving for within-cage identification
	up to 5 siblings maintained per weaning cage until the age of 21 or 22 days
cohabitation to separation
	cohabitant pairs composed of animals from same selection direction (CC, HH) or from animals of either selection direction (CH, HC)
	pairs consisting of same-sex juveniles aged 21-22 days, additional fur shaving applied for identification within the pair
	pairs kept in IVC cages
	weighing and other operations performed under a hood, in cups wiped and sprayed with alcohol between cages
	separated into individual cages 32 days after parturition
habituation
	one animal from each pair separated to a standard ("open") cage with sawdust bedding, other animal to an IVC cage with perforated bottom
	approximately half of animals separated into a given type of cage provided with a pellet of low quality diet, other half receiving a pellet of standard diet
feeding trial
	tests lasting 5 days, performed at animals aging 36-41 days
	at the start of the test cages are changed, standard food is removed and target food is provided into the feeder (standard cages) or at the cage floor, in pre-weighed portions (IVC cages)
	IVC cages changed at day 1 and 3 of the test, standard cages not changed throughout the test
	animals killed with isoflurane and dissected at day 5 of the test
	caecum extracted with flame-sterilised tools, its contents manually removed into an eppendorf tube
	caecum weighed both before and after removing its contents
	caecum contents stored in -80C, carcasses stored in -20C
	contents of IVC cages separated into food pellets, food orts and feces, dried for 48 hours at 60C, then weighed
microbiome DNA sample preparation
	DNA isolated, concentration measured with Nanodrop, then stored in -20C until further processing
	DNA diluted with elution buffer (C6) on 96-well plates to concentration of approvimately 20ng/ul, blank samples not diluted
	PCR1 run on 96-well plates, with initial DNA concentration of approximately 2ng/ul, rRNA gene V4-region-specific 515F and 806R primers and Qiagen Multiplex MasterMix, 22 cycles
	PCR1 products ran on gel1 with EurX Perfect 100-1000bp DNA Ladder, presence of bands recorded
	remaining volume of PCR1 product cleaned with home-made SPRI magnetic beads (clean1)
	clean1 products ran on gel2 with EurX Perfect 100-1000bp DNA Ladder, presence of bands recorded
	indexing PCR run on 96-well plates, with unique combinations of forward (i5) and reverse (i7) custom indexes and Qiagen Multiplex MasterMix, 7 cycles
	indexing PCR products ran on gel3 with EurX Perfect 100-1000bp DNA Ladder, presence and intensity of bands recorded
	samples from each indexing plate pooled according to intensity of bands on gel3 (pool1)
	DNA concentration in each pool1 measued with Qbit
	pools representing individual plates (pool1) combined into final pools (pool2) according to concentration and number of individual samples contributing to pool1
	pool2 cleaned with Promega ProNex magnetic beads (clean2)
	DNA concentration in pool2 sample measured with Qbit, diluted 4x and measured with Qbit again before sending 20ul of the sample to Novogene (Cambridge, UK)
DNA sequencing data cleaning and annotationg
	sequenced by Novogene together with samples from the gBN_MicroCH experiment, received 75G of sequence data
	data processed in qiime2
	primers removed with cutadapt (default error rate = 0.1)
	sequences assembled with PEAR (-v 15 -q 30 -j 40 -m 300)
	quality-filtered for minimum quality of 30
	clustered with deblur denoise-16S (trim-length 252)
	sequenceds aligned to trees with qiime phylogeny align-to-tree-mafft-fasttree
	taxonomy added with classify-consesnsus-vsearch based on SILVA_138 database
DNA data filtering and calculation microbiome-describing variables for the MicroCF manuscript
	data separated from that from gBN_Micro-coh experiment ("filtered")
	ASVs fround in less than 2 samples removed ("filtered2")
	animals from raised by their birth mother removed, along with 3 individuals which had problems during the feeding trial ("filtered3")
	obtained relative frequencies of bacteria divided by all phylogenetic levels from non-rarefied data
	made 20 repeats (bootstraps) of rarefaction to 10227 sequences, which excluded 1 individual with low read count
	calculated alpha-diversity metrics from eachh of the rarefied tables, then averaged them per individual
	calculated unweighted and weighted unifrac distance matrix within each bootstrap of rarefied tables, than averaged them
	performed PCoA on the averaged distance matrices
	limited the averaged distance matrices only to animals representing the high-diversity microbiome type (Ci=0) ("filtered4")
	performed another PCoA analysis on the reduced distance matrices
experiments performed in September-December 2018
DNA processing performed in August-December 2020
sequence processing performed in January-February 2021 and August-September 2023

## Sheet: info_file
Data for project presented in "Experimental evolution of a mammalian holobiont: selection for herbivorous capability in bank voles yields distinct and robust gut microbial communities"
by Małgorzata M. Lipowska, Edyta T. Sadowska, Kevin D. Kohl, Paweł Koteja
Project performed within the long-term artificial selection experiment on bank voles
Aim of the project: studying the effects of selection for herbivorous capability on the vole's gut microbiome and its association with performance in the selection trial
Cohabitation experiment - animals allowed horizontal microbial transfer with an unrelated individual
database combining data from cohabitation, food consumption tests, microbiome taxonomic composition and diversity metrics
Sheets
data	individual-level data from animals which successfully completed the experiment
Alpha	alpha-diversity metrics of caecal microbiome, calculated for animals of both microbiome types, after rarefaction
Beta	beta-diversity scores of caecal microbiome: first 10 axes of Unweighted and Weighted UniFrac PCoA, calculated for animals of both microbiome types, after rarefaction
Beta_Ci0	beta-diversity scores of caecal microbiome: first 10 axes of Unweighted and Weighted UniFrac PCoA, calculated for animals of only the abundant microbiome type (Ci=0), after rarefaction
Tax_legend	legend of code names applied to bacterial taxonomy on a given taxonomic level (Tax_full = full taxonomy, ITax = unique number for a given taxonomic level)
Phylum	relative frequency of microbes at Phylum level calculated from non-rarefied data, fitted with basic individual data
Class	relative frequency of microbes at Class level calculated from non-rarefied data, fitted with basic individual data
Order	relative frequency of microbes at Order level calculated from non-rarefied data, fitted with basic individual data
Family	relative frequency of microbes at Family level calculated from non-rarefied data, fitted with basic individual data
Genus	relative frequency of microbes at Genus level calculated from non-rarefied data, fitted with basic individual data
Species	relative frequency of microbes at Species level calculated from non-rarefied data, fitted with basic individual data
Data Legend
IR	record number of individual
IRWn	record number of individual at weaning
T	selection direction of individual (C - control, H - herbivorous)
L	replicate line of individual
IDD	identification number of individual's mother
Litter	litter number of a given pair
LSWn	litter size at individual's weaning
S	individual's sex at cohabitation (0-female, 1-male)
T_coh	selection direction of cohabitant (C - control, H - herbivorous)
L_coh	replicate line of cohabitant
IC_CH	number of cohabitation cage
Date_CH	date of cohabitation
Age_CH	animal's age at the start of cohabitation [day]
T_CH	combination of selection directions withn a pair of cohabitants (CC, HH - same selection direction, CH - one animal from either selection direction)
L_CH	combination of replicate lines withn a pair of cohabitants (in alphabetical order)
CT	type of cage an individual is placed to at separation ("IVC" - IVC cages with perforated floor and no bedding, "SC" - regular cages with sawdust bedding)
Diet	type of food the individual will be given during the experimant (SD - standard diet, LQD - low-quality diet) - LQD animals receive a pellet of low-quality diet into a cage during separation
Date_MH0	date at the start of feeding trial
Time_MH0	time at the start of the feeding trial
M_MH0	body mass at the start of the feeding trial [g]
Date_MH1	date at day 1 of the feeding trial
Time_MH1	time at day 1 of the feeding trial
M_MH1	body mass at day 1 of the feeding trial [g]
Date_MH3	date at day 3 of the feeding trial
Time_MH3	time at day 3 of the feeding trial
M_MH3	body mass at day 3 of the feeding trial [g]
Date_MH5	date at dissection (day 5 of the feeding trial)
Day_MH5_relB	number of days between the date at dissection (day 5 of the feeding trial) and the first birth in the experiment (2018-09-05)
Time_MH5	time at dissection relative to the first birth in the experiment (number of days since 2018-09-05)
M_MH5	body mass at dissection [g]
FC_15	dry mass of food consumed per day between day 1 and 5 of the feeding trial [g/day]
FD_15	mass of food digested per day between day 1 and 5 of the feeding trial [g/day]
AD_15	approximate digestability of food consumed between day 1 and 5 of the feeding trial [%]
dM_05	change of body mass betweenday 0 and 5 of the feeding trial [g]
Ci	Presence of [Clostridium]_innocuum_group bacteria (1-present, 0-absent), exception for four individuals (IRWn=1818, 1578 - certain cases; IRWn=2745, 1950 - borderline cases) where Ci was not found but samples grouped with the Ci=1 cloud on PCoa graphs and on the heatmap
Out_M_MH0	if an individual is an outlier in M_MH0 analyses (1=yes)
Out_dM05	if an individual is an outlier in dM_05 analyses (1=yes)
Out_Alpha	if an individual is an outlier in alpha-diversity analyses (1=yes)
Out_AD	if an individual is an outlier in FC_15, FD_15 and AD_15 analyses (1=yes)

## Sheet: Data
IR	IRWn	T	L	IDD	Litter	LSWn	S	T_coh	L_coh	IC_CH	Date_CH	Age_CH	T_CH	L_CH	CT	Diet	Date_MH0	Time_MH0	M_MH0	Date_MH1	Time_MH1	M_MH1	Date_MH3	Time_MH3	M_MH3	Date_MH5	Day_MH5_relB	Time_MH5	M_MH5	FC_15	FD_15	AD_15	dM_05	Ci	Out_M_MH0	Out_dM05	Out_Alpha	Out_AD
2	1272	H	H4	BM05929	2	4	1	H	H1	001	43370	21	HH	H1H4	SC	SD	43385	0.447222	23.31	43386	0.448611	23.73	43388	0.459028	24.34	43390	42	0.472222	25.001				1.691	0
3	1126	C	C4	BM06696	2	6	1	C	C1	002	43371	22	CC	C1C4	SC	LQD	43385	0.448611	20.98	43386	0.449306	18.99	43388	0.459722	17.33	43390	42	0.475	18.08				-2.9	0
4	1338	C	C1	BM06543	2	6	1	C	C4	002	43371	21	CC	C1C4	IVC	LQD	43386	0.388889	24.43	43387	0.322917	23.54	43389	0.334028	22.45	43391	43	0.349306	23.271	5.30162	2.99312	56.4567	-1.159	0
5	1128	C	C4	BM06696	2	6	1	H	H3	003	43371	22	CH	C4H3	SC	LQD	43385	0.449306	21.26	43386	0.45	19.77	43388	0.459722	19.41	43390	42	0.477778	18.308				-2.952	0
8	1270	H	H1	BM06326	2	5	0	C	C4	004	43371	22	CH	C4H1	SC	LQD	43385	0.45	19.82	43386	0.45	18.24	43388	0.460417	17.06	43390	42	0.479861	17.262				-2.558	0
9	1130	C	C4	BM06696	2	6	0	H	H4	005	43371	22	CH	C4H4	SC	SD	43385	0.451389	15.96	43386	0.450694	16.21	43388	0.461111	16.55	43390	42	0.482639	16.725				0.765	0
12	1490	H	H2	BM06335	2	5	1	C	C4	006	43371	21	CH	C4H2	SC	LQD	43386	0.459028	26.26	43387	0.45	24.62	43389	0.457639	25.28	43391	43	0.464583	25.818				-0.442	0
14	1467	H	H2	BM05803	2	6	0	H	H4	007	43371	21	HH	H2H4	SC	SD	43386	0.459028	21.02	43387	0.450694	20.99	43389	0.458333	21.97	43391	43	0.465972	22.61				1.59	0
16	1349	C	C1	BM06763	2	6	1	H	H4	008	43371	21	CH	C1H4	SC	LQD	43386	0.460417	23.63	43387	0.451389	20.96	43389	0.459028	18.81	43391	43	0.467361	18.782				-4.848	0
18	1325	C	C2	BM04184	2	5	0	H	H4	009	43371	21	CH	C2H4	SC	SD	43386	0.460417	20.71	43387	0.452083	20.83	43389	0.459028	21	43391	43	0.46875	21.045				0.335	0
20	1271	H	H1	BM06326	2	5	1	H	H4	010	43371	22	HH	H1H4	SC	LQD	43385	0.452083	23.67	43386	0.451389	24.17	43388	0.461806	23.65	43390	42	0.484722	23.814				0.144	0
22	1289	H	H2	BM06459	2	6	1	H	H3	011	43371	21	HH	H2H3	SC	LQD	43386	0.461806	22.44	43387	0.452083	21.55	43389	0.459722	20.83	43391	43	0.470833	21.742				-0.698	0
23	1160	H	H3	BM05865	2	3	0	H	H1	012	43371	22	HH	H1H3	SC	LQD	43385	0.452778	23.08	43386	0.451389	21.76	43388	0.4625	19.7	43390	42	0.488194	20.199				-2.881	0
26	1193	H	H4	BM06358	2	7	0	H	H3	013	43371	22	HH	H3H4	SC	SD	43385	0.453472	22.94	43386	0.452083	22.83	43388	0.4625	23.11	43390	42	0.490972	23.217				0.277	0
28	1352	H	H2	BM05812	2	6	0	H	H3	014	43371	21	HH	H2H3	SC	LQD	43386	0.4625	21.87	43387	0.452778	20.72	43389	0.459722	20.69	43391	43	0.472222	21.251				-0.619	0
30	1478	H	H1	BM04841	2	6	0	H	H3	015	43371	21	HH	H1H3	SC	LQD	43386	0.463194	24.23	43387	0.453472	23.33	43389	0.460417	23.64	43391	43	0.473611	23.472				-0.758	0
34	1213	H	H2	BM05635	2	7	1	C	C3	017	43371	22	CH	C3H2	SC	LQD	43385	0.454167	24.99	43386	0.452778	24.05	43388	0.463194	25.44	43390	42	0.494444	24.5				-0.49	0
38	1269	H	H1	BM06326	2	5	0	C	C3	019	43371	22	CH	C3H1	SC	LQD	43385	0.45625	21.86	43386	0.453472	21.1	43388	0.463889	21.94	43390	42	0.497222	22.216				0.356	0
40	1513	C	C2	BM04854	2	7	1	H	H4	020	43371	21	CH	C2H4	SC	LQD	43386	0.463889	21.52	43387	0.453472	18.91	43389	0.460417	17.78	43391	43	0.475694	18.474				-3.046	0
41	1214	H	H2	BM05635	2	7	1	C	C1	021	43371	22	CH	C1H2	SC	SD	43385	0.456944	22.28	43386	0.454167	22.75	43388	0.464583	23.42	43390	42	0.5	23.914				1.634	0
42	1336	C	C1	BM06543	2	6	1	H	H2	021	43371	21	CH	C1H2	IVC	SD	43386	0.390278	25.79	43387	0.324306	26.23	43389	0.336806	26.62	43391	43	0.352083	26.614	6.04749	4.35524	72.0173	0.824	0
44	1273	H	H4	BM05929	2	4	0	H	H2	022	43371	22	HH	H2H4	SC	SD	43385	0.458333	19.47	43386	0.454861	19.67	43388	0.464583	19.43	43390	42	0.503472	20.099				0.629	0
50	1337	C	C1	BM06543	2	6	0	H	H1	025	43371	21	CH	C1H1	SC	SD	43386	0.464583	20.78	43387	0.454167	21.42	43389	0.460417	21.94	43391	43	0.477083	21.821				1.041	1
54	1419	H	H2	BM06491	2	8	0	H	H3	027	43371	21	HH	H2H3	SC	SD	43386	0.465278	19.86	43387	0.454861	19.64	43389	0.461111	20.68	43391	43	0.478472	20.941				1.081	0
56	1268	H	H1	BM06326	2	5	1	H	H3	028	43371	22	HH	H1H3	SC	SD	43385	0.460417	22.84	43386	0.455556	23.51	43388	0.465278	24.39	43390	42	0.505556	24.807				1.967	0
58	1264	H	H4	BM06501	2	4	1	H	H3	029	43371	22	HH	H3H4	SC	LQD	43385	0.461111	25.66	43386	0.45625	24.39	43388	0.465972	25.31	43390	42	0.508333	23.712				-1.948	0
60	1275	H	H4	BM05929	2	4	1	C	C4	030	43371	22	CH	C4H4	SC	LQD	43385	0.461806	21.8	43386	0.456944	20.9	43388	0.465972	20.13	43390	42	0.511806	21.51				-0.29	0
62	1328	C	C2	BM06893	2	6	0	C	C4	031	43371	21	CC	C2C4	SC	LQD	43386	0.465972	16.95	43387	0.455556	17.46	43389	0.461111	17.22	43391	43	0.479861	16.984				0.034	0
64	1529	C	C1	BM05754	2	5	1	C	C4	032	43371	21	CC	C1C4	SC	LQD	43386	0.466667	17.91	43387	0.455556	17.09	43389	0.461806	16.59	43391	43	0.482639	15.726				-2.184	0
66	1334	C	C1	BM06543	2	6	0	H	H4	033	43371	21	CH	C1H4	SC	SD	43386	0.468056	18.68	43387	0.45625	18.54	43389	0.461806	19.17	43391	43	0.484028	18.393				-0.287	0
70	1339	C	C1	BM06543	2	6	1	H	H3	035	43372	22	CH	C1H3	SC	LQD	43386	0.46875	23.39	43387	0.456944	21.41	43389	0.461806	20.42	43391	43	0.486111	18.816				-4.574	0
71	1284	H	H3	BM06367	2	5	1	H	H1	036	43372	22	HH	H1H3	SC	LQD	43386	0.469444	25.36	43387	0.457639	24.48	43389	0.4625	23.89	43391	43	0.4875	23.48				-1.88	0
72	1300	H	H1	BM05271	2	8	1	H	H3	036	43372	22	HH	H1H3	IVC	LQD	43386	0.392361	24.04	43387	0.326389	23.41	43389	0.338889	24.7	43391	43	0.35625	25.056	6.34162	3.67937	58.0194	1.016	0
73	1285	H	H3	BM06367	2	5	0	C	C4	037	43372	22	CH	C4H3	SC	SD	43386	0.470139	23.2	43387	0.458333	23.82	43389	0.4625	24.15	43391	43	0.488889	24.642				1.442	0
74	1511	C	C4	BM05496	2	4	0	H	H3	037	43372	22	CH	C4H3	IVC	SD	43386	0.39375	16.38	43387	0.327083	17.49	43389	0.340278	18	43391	43	0.359722	18.241	4.55641	3.58041	78.5796	1.861	0
77	1287	H	H2	BM06459	2	6	0	C	C2	039	43372	22	CH	C2H2	SC	LQD	43386	0.470833	19.68	43387	0.458333	18.38	43389	0.4625	18.6	43391	43	0.490278	18.734				-0.946	0
78	1572	C	C2	BM04624	2	6	0	H	H2	039	43372	21	CH	C2H2	IVC	SD	43387	0.381944	21.51	43388	0.351389	22.12	43390	0.349306	23.01	43392	44	0.327083	23.544	4.91204	3.99804	81.3927	2.034	0
79	1288	H	H2	BM06459	2	6	0	C	C1	040	43372	22	CH	C1H2	SC	LQD	43386	0.471528	21.78	43387	0.459028	20.59	43389	0.463194	21.38	43391	43	0.491667	21.355				-0.425	0
80	1434	C	C1	BM04482	2	5	0	H	H2	040	43372	22	CH	C1H2	IVC	LQD	43386	0.394444	18.82	43387	0.327778	17.66	43389	0.340972	18.38	43391	43	0.361111	19.03	5.88596	3.51221	59.671	0.21	0
81	1290	H	H2	BM06459	2	6	1	H	H1	041	43372	22	HH	H1H2	SC	SD	43386	0.472222	24.11	43387	0.459722	24.56	43389	0.463194	25.34	43391	43	0.493056	25.758				1.648	0
82	1533	H	H1	BM06735	2	4	1	H	H2	041	43372	22	HH	H1H2	IVC	LQD	43386	0.395833	20.01	43387	0.329167	20.19	43389	0.342361	21.76	43391	43	0.363194	23.076	6.61726	3.83776	57.9962	3.066	0
84	1402	C	C4	BM04161	2	5	1	H	H2	042	43372	22	CH	C4H2	SC	SD	43386	0.472917	20.42	43387	0.459722	20.76	43389	0.463889	20.9	43391	43	0.495139	20.771				0.351	0
85	1297	H	H1	BM05271	2	8	0	H	H4	043	43372	22	HH	H1H4	IVC	SD	43386	0.397917	22.42	43387	0.330556	22.51	43389	0.344444	23.33	43391	43	0.365972	24.027	5.42807	4.37032	80.5133	1.607	0
86	1312	H	H4	BM06350	2	6	0	H	H1	043	43372	22	HH	H1H4	SC	LQD	43386	0.473611	22.61	43387	0.460417	22.82	43389	0.463889	23.67	43391	43	0.496528	22.613				0.003	0
87	1298	H	H1	BM05271	2	8	0	H	H2	044	43372	22	HH	H1H2	IVC	LQD	43386	0.398611	17.94	43387	0.331944	17.35	43389	0.345139	18.79	43391	43	0.367361	18.868	5.74555	3.3383	58.1024	0.928	0
88	1417	H	H2	BM06491	2	8	0	H	H1	044	43372	22	HH	H1H2	SC	LQD	43386	0.474306	20.09	43387	0.461111	20.16	43389	0.463889	19.85	43391	43	0.497917	20.707				0.617	0
89	1301	H	H1	BM05271	2	8	1	C	C1	045	43372	22	CH	C1H1	IVC	SD	43386	0.399306	24.18	43387	0.332639	24.27	43389	0.346528	25.18	43391	43	0.369444	25.752	5.37084	4.39734	81.8743	1.572	0
90	1383	C	C1	BM04208	2	7	1	H	H1	045	43372	22	CH	C1H1	SC	SD	43386	0.475	20.21	43387	0.461806	20.14	43389	0.464583	20.68	43391	43	0.499306	21.416				1.206	0
91	1310	H	H4	BM06350	2	6	1	H	H2	046	43372	22	HH	H2H4	SC	SD	43386	0.475694	23.82	43387	0.461806	23.6	43389	0.464583	24.83	43391	43	0.501389	24.886				1.066	0
93	1313	H	H4	BM06350	2	6	0	C	C1	047	43372	22	CH	C1H4	IVC	SD	43386	0.401389	19.25	43387	0.334028	19.72	43389	0.348611	20.41	43391	43	0.372917	20.882	4.40347	3.58647	81.4464	1.632	0
94	1531	C	C1	BM05754	2	5	0	H	H4	047	43372	22	CH	C1H4	SC	LQD	43386	0.476389	16.46	43387	0.4625	13.54	43389	0.465278	13.65	43391	43	0.502778	14.108				-2.352	0
97	1317	H	H2	BM05689	2	7	0	H	H4	049	43372	22	HH	H2H4	IVC	SD	43386	0.402778	22.54	43387	0.334722	23.23	43389	0.35	23.74	43391	43	0.374306	23.649	5.41056	4.38581	81.0602	1.109	0
98	1638	H	H4	BM06563	2	6	0	H	H2	049	43372	21	HH	H2H4	SC	LQD	43387	0.483333	21.57	43388	0.46875	22.14	43390	0.479167	21.37	43392	44	0.464583	22.958				1.388	0
100	1528	C	C1	BM05754	2	5	1	H	H2	050	43372	22	CH	C1H2	SC	SD	43386	0.477083	18.15	43387	0.463194	18.34	43389	0.465278	18.68	43391	43	0.504861	19.653				1.503	0
101	1321	H	H2	BM05689	2	7	0	H	H3	051	43372	22	HH	H2H3	IVC	SD	43386	0.404167	25.87	43387	0.336806	26.63	43389	0.352083	28.06	43391	43	0.377083	28.136	5.97394	4.65969	78.0003	2.266	0
102	1521	H	H3	BM06820	2	7	0	H	H2	051	43372	22	HH	H2H3	SC	SD	43386	0.477778	21.12	43387	0.463889	21.04	43389	0.465972	22.5	43391	43	0.50625	22.828				1.708	0
103	1323	C	C2	BM04184	2	5	0	H	H1	052	43372	22	CH	C2H1	SC	SD	43386	0.478472	21.69	43387	0.463889	21.42	43389	0.465972	23.94	43391	43	0.508333	23.281				1.591	0
104	1536	H	H1	BM06735	2	4	0	C	C2	052	43372	22	CH	C2H1	IVC	LQD	43386	0.405556	23.4	43387	0.338194	23.85	43389	0.353472	23.41	43391	43	0.379167	23.744	5.76132	3.29232	57.1452	0.344	0
107	1326	C	C2	BM04184	2	5	1	C	C1	054	43372	22	CC	C1C2	SC	LQD	43386	0.479167	21.35	43387	0.464583	19	43389	0.465972	17.7	43391	43	0.509722	16.412				-4.938	0
108	1432	C	C1	BM04482	2	5	1	C	C2	054	43372	22	CC	C1C2	IVC	SD	43386	0.406944	22.78	43387	0.338889	21.03	43389	0.354861	22.75	43391	43	0.38125	22.614	5.06533	4.09108	80.7663	-0.166	0
109	1327	C	C2	BM04184	2	5	0	C	C4	055	43372	22	CC	C2C4	SC	SD	43386	0.479861	20.47	43387	0.465278	20.08	43389	0.466667	20.36	43391	43	0.511806	20.133				-0.337	0
110	1508	C	C4	BM05496	2	4	0	C	C2	055	43372	22	CC	C2C4	IVC	LQD	43386	0.407639	21.42	43387	0.340278	20.8	43389	0.357639	20.61	43391	43	0.382639	20.505	6.28902	3.52727	56.0862	-0.915	0
111	1329	C	C2	BM06893	2	6	1	H	H2	056	43372	22	CH	C2H2	SC	LQD	43386	0.48125	19.63	43387	0.465278	18.58	43389	0.466667	19.49	43391	43	0.513194	18.058				-1.572	0
113	1330	C	C2	BM06893	2	6	0	H	H4	057	43372	22	CH	C2H4	SC	LQD	43386	0.481944	17.48	43387	0.465972	16.17	43389	0.467361	14.29	43391	43	0.515278	11.651				-5.829	0
114	1457	H	H4	BM06373	2	7	0	C	C2	057	43372	22	CH	C2H4	IVC	LQD	43386	0.409722	23.03	43387	0.341667	23.05	43389	0.360417	24.23	43391	43	0.386806	24.536	6.62541	3.77516	56.98	1.506	0
115	1331	C	C2	BM06893	2	6	1	C	C1	058	43372	22	CC	C1C2	IVC	LQD	43386	0.411111	24.39	43387	0.342361	23.09	43389	0.361111	23.5	43391	43	0.388889	23.792	6.14344	3.55244	57.8249	-0.598	0
116	1391	C	C1	BM06269	2	6	1	C	C2	058	43372	22	CC	C1C2	SC	SD	43386	0.482639	20.83	43387	0.466667	20.31	43389	0.467361	20.64	43391	43	0.517361	20.974				0.144	0
117	1332	C	C2	BM06893	2	6	1	C	C3	059	43372	22	CC	C2C3	IVC	SD	43386	0.411806	24.29	43387	0.34375	24.59	43389	0.3625	25.44	43391	43	0.390278	25.674	5.75898	4.58373	79.5928	1.384	0
118	1601	C	C3	BM04373	2	5	1	C	C2	059	43372	21	CC	C2C3	SC	LQD	43387	0.484028	19.76	43388	0.46875	18.25	43390	0.479861	17.08	43392	44	0.465972	16.512				-3.248	0
121	1344	C	C1	BM06763	2	6	1	C	C4	061	43372	22	CC	C1C4	IVC	SD	43386	0.4125	21.04	43387	0.344444	21.54	43389	0.363889	22.72	43391	43	0.391667	24.138	5.5716	4.3821	78.6507	3.098	0
122	1584	C	C4	BM04231	2	5	1	C	C1	061	43372	21	CC	C1C4	SC	SD	43387	0.484722	20.09	43388	0.469444	20.21	43390	0.479861	20.94	43392	44	0.467361	21.463				1.373	1
125	1348	C	C1	BM06763	2	6	1	H	H1	063	43372	22	CH	C1H1	SC	LQD	43386	0.483333	21.57	43387	0.467361	20.62	43389	0.468056	20.13	43391	43	0.51875	19.672				-1.898	0
127	1353	H	H2	BM05812	2	6	0	C	C4	064	43372	22	CH	C4H2	SC	SD	43386	0.484028	22.4	43387	0.468056	22.29	43389	0.468056	22.74	43391	43	0.520139	22.587				0.187	0
128	1728	C	C4	BM06693	2	6	0	H	H2	064	43372	21	CH	C4H2	IVC	LQD	43387	0.382639	17.94	43388	0.352778	17.34	43390	0.350694	18.1	43392	44	0.328472	18.995	7.14947	3.92347	54.8778	1.055	0
129	1355	H	H2	BM05812	2	6	1	H	H4	065	43372	22	HH	H2H4	IVC	SD	43386	0.414583	23.13	43387	0.346528	23.83	43389	0.367361	23.81	43391	43	0.395139	24.491	5.42606	4.21031	77.5942	1.361	0
130	1507	H	H4	BM06349	2	4	1	H	H2	065	43372	22	HH	H2H4	SC	LQD	43386	0.485417	23.4	43387	0.46875	21.99	43389	0.46875	20.03	43391	43	0.522222	19.33				-4.07	0
131	1379	C	C1	BM04208	2	7	0	H	H3	066	43372	22	CH	C1H3	SC	SD	43386	0.486111	20.23	43387	0.469444	20.17	43389	0.46875	20.31	43391	43	0.523611	20.479				0.249	0
133	1380	C	C1	BM04208	2	7	0	C	C3	067	43372	22	CC	C1C3	IVC	SD	43386	0.415972	18.82	43387	0.347222	18.91	43389	0.368056	19.29	43391	43	0.396528	19.461	4.59255	3.6798	80.1254	0.641	0
134	1764	C	C3	BM06002	2	5	0	C	C1	067	43372	21	CC	C1C3	SC	SD	43387	0.485417	18.56	43388	0.469444	19.37	43390	0.480556	19.67	43392	44	0.46875	19.39				0.83	0
135	1381	C	C1	BM04208	2	7	1	H	H2	068	43372	22	CH	C1H2	IVC	LQD	43386	0.416667	23.18	43387	0.348611	21.89	43389	0.369444	21.73	43391	43	0.398611	22.085	5.41287	3.11637	57.5733	-1.095	0
136	1420	H	H2	BM04695	2	8	1	C	C1	068	43372	22	CH	C1H2	SC	LQD	43386	0.486806	23.4	43387	0.469444	22.91	43389	0.469444	24.96	43391	43	0.525694	24.45				1.05	0
137	1384	C	C1	BM04208	2	7	0	C	C2	069	43372	22	CC	C1C2	IVC	SD	43386	0.418056	21.37	43387	0.349306	20.84	43389	0.370139	21.86	43391	43	0.4	20.768	4.39491	3.60416	82.0076	-0.602	0
138	1517	C	C2	BM04854	2	7	0	C	C1	069	43372	22	CC	C1C2	SC	LQD	43386	0.4875	19.07	43387	0.470139	17.84	43389	0.469444	17.58	43391	43	0.527778	16.774				-2.296	0
139	1385	C	C1	BM04208	2	7	1	H	H4	070	43372	22	CH	C1H4	IVC	LQD	43386	0.419444	27.18	43387	0.35	26.15	43389	0.371528	24.06	43391	43	0.402083	26.862	8.11613	4.36063	53.7279	-0.318	1
140	1505	H	H4	BM06349	2	4	1	C	C1	070	43372	22	CH	C1H4	SC	SD	43386	0.488194	22.63	43387	0.470833	22.94	43389	0.469444	23.19	43391	43	0.529167	24.05				1.42	0
141	1386	C	C1	BM06269	2	6	1	C	C3	071	43372	22	CC	C1C3	IVC	LQD	43386	0.420833	22.55	43387	0.351389	20.27	43389	0.372222	19.81	43391	43	0.404861	20.545	4.76267	2.75217	57.7863	-2.005	0
142	1566	C	C3	BM05303	2	4	1	C	C1	071	43372	21	CC	C1C3	SC	LQD	43387	0.486111	23.29	43388	0.470139	21.85	43390	0.480556	20.5	43392	44	0.470139	20.02				-3.27	0
144	1705	H	H1	BM06048	2	6	1	C	C1	072	43372	21	CH	C1H1	SC	LQD	43387	0.486806	23.08	43388	0.470833	20.63	43390	0.48125	20.39	43392	44	0.471528	18.423				-4.657	0
145	1388	C	C1	BM06269	2	6	0	C	C4	073	43372	22	CC	C1C4	IVC	LQD	43386	0.422917	18.44	43387	0.353472	16.81	43389	0.374306	16.76	43391	43	0.407639	18.093	5.57514	3.22989	57.9338	-0.347	0
146	1603	C	C4	BM04348	2	4	0	C	C1	073	43372	21	CC	C1C4	SC	LQD	43387	0.4875	17.8	43388	0.471528	15.77	43390	0.48125	14.09	43392	44	0.472917	12.355				-5.445	0
147	1389	C	C1	BM06269	2	6	1	H	H3	074	43372	22	CH	C1H3	SC	SD	43386	0.488889	20.58	43387	0.470833	20.64	43389	0.470139	21.16	43391	43	0.530556	22.6				2.02	0
149	1390	C	C1	BM06269	2	6	0	H	H2	075	43372	22	CH	C1H2	IVC	SD	43386	0.425	18.72	43387	0.355556	18.23	43389	0.375694	18.7	43391	43	0.410417	19.232				0.512	0
150	1487	H	H2	BM06335	2	5	0	C	C1	075	43372	22	CH	C1H2	SC	SD	43386	0.489583	21.81	43387	0.471528	22.95	43389	0.470139	22.79	43391	43	0.532639	24.07				2.26	0
151	1400	C	C4	BM04161	2	5	0	H	H1	076	43372	22	CH	C4H1	SC	LQD	43386	0.490278	17.47	43387	0.472222	14.57	43389	0.470833	13.77	43391	43	0.534722	13.867				-3.603	0
152	1535	H	H1	BM06735	2	4	0	C	C4	076	43372	22	CH	C4H1	IVC	SD	43386	0.425694	21.91	43387	0.35625	21.7	43389	0.376389	22.75	43391	43	0.4125	22.538	5.4041	4.3906	81.2457	0.628	0
155	1403	C	C4	BM04161	2	5	0	C	C1	078	43372	22	CC	C1C4	IVC	LQD	43386	0.426389	21.76	43387	0.356944	21.11	43389	0.377778	21.6	43391	43	0.413889	21.948	6.48103	3.66078	56.4846	0.188	0
156	1436	C	C1	BM04482	2	5	0	C	C4	078	43372	22	CC	C1C4	SC	LQD	43386	0.490972	20.2	43387	0.472222	18.87	43389	0.470833	18.12	43391	43	0.536111	17.588				-2.612	0
157	1412	H	H2	BM06491	2	8	1	C	C3	079	43372	22	CH	C3H2	SC	SD	43386	0.491667	22.34	43387	0.473611	22.94	43389	0.470833	23.48	43391	43	0.5375	23.928				1.588	0
158	1600	C	C3	BM04373	2	5	1	H	H2	079	43372	21	CH	C3H2	IVC	SD	43387	0.384028	19.89	43388	0.353472	19.59	43390	0.352083	19.26	43392	44	0.329861	19.113	4.67468	3.60643	77.1482	-0.777	0
159	1413	H	H2	BM06491	2	8	0	C	C2	080	43372	22	CH	C2H2	IVC	LQD	43386	0.427778	18.18	43387	0.357639	18.16	43389	0.378472	18.33	43391	43	0.415278	18.434	5.94234	3.26684	54.9757	0.254	0
160	1512	C	C2	BM04854	2	7	0	H	H2	080	43372	22	CH	C2H2	SC	SD	43386	0.492361	21.84	43387	0.474306	22.61	43389	0.471528	22.75	43391	43	0.539583	22.462				0.622	0
162	1545	C	C1	BM05851	2	6	1	H	H2	081	43372	22	CH	C1H2	SC	LQD	43386	0.493056	20.6	43387	0.474306	19.59	43389	0.471528	19.64	43391	43	0.540972	18.265				-2.335	0
163	1416	H	H2	BM06491	2	8	0	H	H4	082	43372	22	HH	H2H4	SC	LQD	43386	0.49375	18.03	43387	0.475	18.16	43389	0.472222	18.98	43391	43	0.542361	19.992				1.962	0
164	1797	H	H4	BM06480	2	7	0	H	H2	082	43372	21	HH	H2H4	IVC	LQD	43387	0.384722	21.95	43388	0.354167	21.65	43390	0.354167	21.55	43392	44	0.33125	21.851	6.83312	3.89687	57.0292	-0.099	0
165	1424	H	H2	BM04695	2	8	0	H	H1	083	43372	22	HH	H1H2	SC	SD	43386	0.494444	21.87	43387	0.475694	21.9	43389	0.472222	22.93	43391	43	0.544444	23.433				1.563	0
166	1479	H	H1	BM04841	2	6	0	H	H2	083	43372	22	HH	H1H2	IVC	SD	43386	0.429861	21.26	43387	0.360417	20.68	43389	0.38125	21.03	43391	43	0.41875	21.723	4.71419	3.85419	81.7572	0.463	0
168	1553	H	H3	BM06464	2	4	1	H	H2	084	43372	22	HH	H2H3	SC	SD	43386	0.495139	27.32	43387	0.476389	27.04	43389	0.472917	28.07	43391	43	0.546528	28.536				1.216	0
169	1433	C	C1	BM04482	2	5	0	H	H3	085	43372	22	CH	C1H3	SC	LQD	43386	0.496528	18.7	43387	0.476389	16.93	43389	0.472917	16.79	43391	43	0.548611	16.34				-2.36	0
171	1435	C	C1	BM04482	2	5	0	H	H4	086	43372	22	CH	C1H4	IVC	SD	43386	0.431944	17.58	43387	0.361806	17.41	43389	0.383333	18.33	43391	43	0.422222	18.155	4.39974	3.52149	80.0386	0.575	0
172	1665	H	H4	BM05298	2	5	0	C	C1	086	43372	21	CH	C1H4	SC	LQD	43387	0.488194	23.01	43388	0.472222	21.59	43390	0.481944	22.14	43392	44	0.474306	22.368				-0.642	0
173	1458	H	H4	BM06373	2	7	0	H	H3	087	43372	22	HH	H3H4	IVC	SD	43386	0.434028	21.19	43387	0.3625	23.66	43389	0.384028	23.87	43391	43	0.423611	24.32	5.08775	4.13325	81.2393	3.13	0
174	1525	H	H3	BM06820	2	7	0	H	H4	087	43372	22	HH	H3H4	SC	LQD	43386	0.497222	20.73	43387	0.477083	20.31	43389	0.473611	18.4	43391	43	0.550694	17.002				-3.728	0
175	1459	H	H4	BM06373	2	7	1	C	C1	088	43372	22	CH	C1H4	SC	LQD	43386	0.497917	24.9	43387	0.477778	25.08	43389	0.473611	24.12	43391	43	0.552083	25.41				0.51	0
176	1542	C	C1	BM05851	2	6	1	H	H4	088	43372	22	CH	C1H4	IVC	SD	43386	0.434722	22.49	43387	0.363889	22.51	43389	0.386111	22.89	43391	43	0.425694	23.133	5.75153	4.59503	79.8923	0.643	0
177	1460	H	H4	BM06373	2	7	1	H	H1	089	43372	22	HH	H1H4	SC	LQD	43386	0.499306	25.05	43387	0.478472	24.67	43389	0.475694	25.51	43391	43	0.554167	25.793				0.743	0
178	1537	H	H1	BM06734	2	4	1	H	H4	089	43372	22	HH	H1H4	IVC	SD	43386	0.435417	24.54	43387	0.364583	25.27	43389	0.386806	25.89	43391	43	0.427083	27.189	6.55664	5.06189	77.2025	2.649	0
180	1486	H	H2	BM06335	2	5	1	H	H4	090	43372	22	HH	H2H4	SC	SD	43386	0.5	26.26	43387	0.478472	26.3	43389	0.475694	28.11	43391	43	0.55625	28.106				1.846	0
181	1468	H	H2	BM05803	2	6	1	C	C4	091	43372	22	CH	C4H2	SC	SD	43386	0.500694	26.82	43387	0.479167	27.58	43389	0.476389	28.81	43391	43	0.557639	29.445				2.625	0
182	1606	C	C4	BM04348	2	4	1	H	H2	091	43372	21	CH	C4H2	IVC	LQD	43387	0.386806	21.54	43388	0.35625	20.15	43390	0.356944	21.19	43392	44	0.334722	20.537	5.42073	3.16998	58.4789	-1.003	0
183	1477	H	H1	BM04841	2	6	0	H	H4	092	43372	22	HH	H1H4	IVC	LQD	43386	0.4375	21.68	43387	0.366667	22.42	43389	0.389583	23.64	43391	43	0.43125	23.481	6.41245	3.66445	57.1459	1.801	0
184	1504	H	H4	BM06349	2	4	0	H	H1	092	43372	22	HH	H1H4	SC	SD	43386	0.502083	20.18	43387	0.479861	20.01	43389	0.476389	20.6	43391	43	0.559722	20.724				0.544	1
188	1539	H	H1	BM06734	2	4	1	H	H2	094	43372	22	HH	H1H2	SC	LQD	43386	0.502778	22.33	43387	0.480556	20.95	43389	0.477083	23.04	43391	43	0.561806	22.831				0.501	0
189	1514	C	C2	BM04854	2	7	0	H	H3	095	43372	22	CH	C2H3	IVC	SD	43386	0.439583	20.1	43387	0.36875	20.07	43389	0.391667	20.27	43391	43	0.434722	20.682	3.82354	3.01079	78.7435	0.582	0
190	1800	H	H3	BM04824	2	6	0	C	C2	095	43372	21	CH	C2H3	SC	SD	43387	0.488889	20.08	43388	0.472222	20.49	43390	0.481944	20.53	43392	44	0.476389	20.937				0.857	0
195	1538	H	H1	BM06734	2	4	0	C	C1	098	43372	22	CH	C1H1	SC	SD	43386	0.503472	18.9	43387	0.48125	18.73	43389	0.477083	19.22	43391	43	0.566667	20.283				1.383	0
196	1544	C	C1	BM05851	2	6	0	H	H1	098	43372	22	CH	C1H1	IVC	LQD	43386	0.440972	17.74	43387	0.369444	17.05	43389	0.393056	17.06	43391	43	0.436111	16.915	4.90688	2.82238	57.5188	-0.825	0
197	1543	C	C1	BM05851	2	6	1	H	H3	099	43372	22	CH	C1H3	IVC	SD	43386	0.442361	18.79	43387	0.370833	19.08	43389	0.394444	19.28	43391	43	0.438194	20.036	4.49353	3.70053	82.3524	1.246	0
198	1802	H	H3	BM04824	2	6	1	C	C1	099	43372	21	CH	C1H3	SC	SD	43387	0.489583	20.96	43388	0.472917	21.38	43390	0.482639	22.27	43392	44	0.477778	23.035				2.075	0
200	1711	C	C2	BM06752	2	8	1	C	C1	100	43372	21	CC	C1C2	IVC	SD	43387	0.3875	24.49	43388	0.357639	24.63	43390	0.358333	25.76	43392	44	0.336111	26.177	5.95695	4.6802	78.567	1.687	0
201	1565	C	C3	BM05303	2	4	1	C	C2	101	43373	22	CC	C2C3	IVC	SD	43387	0.388889	23.33	43388	0.358333	22.79	43390	0.359722	22.5	43392	44	0.3375	23.245	4.85768	3.75243	77.2474	-0.085	0
202	1570	C	C2	BM04624	2	6	1	C	C3	101	43373	22	CC	C2C3	SC	LQD	43387	0.490278	24.69	43388	0.472917	20.2	43390	0.483333	19.84	43392	44	0.479167	21.513				-3.177	0
203	1567	C	C3	BM05303	2	4	0	H	H4	102	43373	22	CH	C3H4	IVC	SD	43387	0.389583	19.35	43388	0.359722	19.07	43390	0.360417	19.68	43392	44	0.338889	19.97	4.23485	3.48335	82.2544	0.62	0
204	1576	H	H4	BM06388	2	6	0	C	C3	102	43373	22	CH	C3H4	SC	SD	43387	0.491667	24.64	43388	0.473611	24.34	43390	0.483333	25.27	43392	44	0.480556	25.7				1.06	0
205	1569	C	C2	BM04624	2	6	0	H	H1	103	43373	22	CH	C2H1	SC	LQD	43387	0.492361	20.49	43388	0.473611	17.66	43390	0.484028	18.1	43392	44	0.481944	17.691				-2.799	0
206	1710	H	H1	BM06048	2	6	0	C	C2	103	43373	22	CH	C2H1	IVC	SD	43387	0.390972	20.36	43388	0.360417	21.3	43390	0.361806	21.86	43392	44	0.340278	21.66	4.17151	3.48126	83.4532	1.3	0
207	1571	C	C2	BM04624	2	6	0	H	H4	104	43373	22	CH	C2H4	IVC	LQD	43387	0.391667	21.76	43388	0.361111	20.3	43390	0.3625	20.31	43392	44	0.341667	20.145	4.45879	2.65954	59.6472	-1.615	0
208	1580	H	H4	BM06388	2	6	0	C	C2	104	43373	22	CH	C2H4	SC	SD	43387	0.494444	20.95	43388	0.473611	21.34	43390	0.484722	22.38	43392	44	0.483333	22.606				1.656	0
209	1573	C	C2	BM04624	2	6	0	C	C4	105	43373	22	CC	C2C4	IVC	SD	43387	0.393056	18.58	43388	0.361806	18.86	43390	0.363194	19.15	43392	44	0.34375	19.106	4.12575	3.384	82.0214	0.526	0
210	1591	C	C4	BM06053	2	5	0	C	C2	105	43373	22	CC	C2C4	SC	SD	43387	0.495139	15.56	43388	0.474306	15.33	43390	0.484722	15.72	43392	44	0.484722	15.886				0.326	0
211	1574	C	C2	BM04624	2	6	1	C	C1	106	43373	22	CC	C1C2	IVC	SD	43387	0.39375	24.95	43388	0.3625	25.4	43390	0.364583	26.38	43392	44	0.345139	26.839	6.00276	4.59876	76.6108	1.889	0
212	1597	C	C1	BM06557	2	2	1	C	C2	106	43373	22	CC	C1C2	SC	LQD	43387	0.495833	21.04	43388	0.474306	18.99	43390	0.485417	17.48	43392	44	0.486111	17.367				-3.673	0
214	1708	H	H1	BM06048	2	6	1	H	H4	107	43373	22	HH	H1H4	SC	SD	43387	0.496528	25.4	43388	0.475	24.68	43390	0.485417	26.11	43392	44	0.4875	25.82				0.42	0
216	1590	C	C1	BM06245	2	5	1	H	H4	108	43373	22	CH	C1H4	SC	SD	43387	0.497222	24.72	43388	0.475	24.92	43390	0.486111	23.47	43392	44	0.488889	24.565				-0.155	0
217	1578	H	H4	BM06388	2	6	1	H	H3	109	43373	22	HH	H3H4	IVC	SD	43387	0.396528	23.73	43388	0.365278	23.93	43390	0.368056	25.06	43392	44	0.349306	25.194	4.53273	3.56398	78.6277	1.464	1
218	1804	H	H3	BM04824	2	6	1	H	H4	109	43373	22	HH	H3H4	SC	SD	43387	0.497917	22.02	43388	0.475694	22.54	43390	0.486806	23.48	43392	44	0.490278	23.915				1.895	0
220	1729	C	C4	BM06693	2	6	1	H	H4	110	43373	22	CH	C4H4	SC	LQD	43387	0.498611	24.12	43388	0.475694	22.26	43390	0.486806	19.94	43392	44	0.491667	18.96				-5.16	0
221	1581	C	C4	BM04231	2	5	1	C	C2	111	43373	22	CC	C2C4	IVC	SD	43387	0.398611	21.12	43388	0.367361	20.94	43390	0.370139	22.28	43392	44	0.352778	22.782	6.04742	4.39067	72.604	1.662	1
222	1649	C	C2	BM05737	2	8	1	C	C4	111	43373	22	CC	C2C4	SC	LQD	43387	0.5	24.06	43388	0.476389	21.86	43390	0.4875	21.19	43392	44	0.493056	20.37				-3.69	0
223	1582	C	C4	BM04231	2	5	0	H	H1	112	43373	22	CH	C4H1	IVC	SD	43387	0.4	18.67	43388	0.36875	18.93	43390	0.370833	19.14	43392	44	0.354861	19.75	4.77889	3.51489	73.5503	1.08	1
224	1780	H	H1	BM06560	2	7	0	C	C4	112	43373	22	CH	C4H1	SC	SD	43387	0.500694	17.72	43388	0.476389	18.02	43390	0.488194	18.4	43392	44	0.494444	18.741				1.021	0
225	1583	C	C4	BM04231	2	5	0	H	H3	113	43373	22	CH	C4H3	IVC	LQD	43387	0.401389	20.14	43388	0.369444	19.01	43390	0.372222	18.04	43392	44	0.356944	17.406	3.16255	1.87005	59.131	-2.734	1
226	1790	H	H3	BM06845	2	5	0	C	C4	113	43373	22	CH	C4H3	SC	LQD	43387	0.501389	20.94	43388	0.477083	20.92	43390	0.488194	19.4	43392	44	0.495833	19.131				-1.809	0
227	1585	C	C4	BM04231	2	5	1	H	H4	114	43373	22	CH	C4H4	SC	SD	43387	0.502083	21.71	43388	0.477083	20.87	43390	0.488194	22.42	43392	44	0.497917	23.268				1.558	1
228	1756	H	H4	BM06359	2	4	1	C	C4	114	43373	22	CH	C4H4	IVC	SD	43387	0.402083	25.37	43388	0.370833	24.62	43390	0.372917	25.94	43392	44	0.359028	26.618	6.1769	4.9209	79.6662	1.248	0
229	1586	C	C1	BM06245	2	5	0	H	H3	115	43373	22	CH	C1H3	IVC	SD	43387	0.403472	19.79	43388	0.371528	19.06	43390	0.373611	19.42	43392	44	0.361111	18.849	4.23864	3.54764	83.6976	-0.941	0
231	1587	C	C1	BM06245	2	5	0	C	C4	116	43373	22	CC	C1C4	IVC	SD	43387	0.404861	19.04	43388	0.372917	19.25	43390	0.375	20.11	43392	44	0.3625	19.485	4.42644	3.54844	80.1646	0.445	0
232	1733	C	C4	BM06693	2	6	0	C	C1	116	43373	22	CC	C1C4	SC	SD	43387	0.503472	17.12	43388	0.477778	17.39	43390	0.489583	18.42	43392	44	0.501389	19.253				2.133	0
233	1588	C	C1	BM06245	2	5	0	C	C3	117	43373	22	CC	C1C3	SC	SD	43387	0.504167	17.84	43388	0.477778	18.43	43390	0.490278	17.93	43392	44	0.503472	18.311				0.471	0
234	1816	C	C3	BM05957	2	6	0	C	C1	117	43373	21	CC	C1C3	IVC	LQD	43388	0.41875	18.06	43389	0.403472	16.88	43391	0.351389	16.66	43393	45	0.357639	16.584	4.54444	2.62044	57.6626	-1.476	0
235	1589	C	C1	BM06245	2	5	0	H	H1	118	43373	22	CH	C1H1	IVC	SD	43387	0.405556	21.09	43388	0.373611	21.69	43390	0.375694	21.48	43392	44	0.363889	21.021	4.63784	3.80934	82.1361	-0.069	0
236	1777	H	H1	BM06560	2	7	0	C	C1	118	43373	22	CH	C1H1	SC	LQD	43387	0.504861	21.43	43388	0.478472	20.14	43390	0.490278	21.29	43392	44	0.504861	19.885				-1.545	0
237	1592	C	C4	BM06053	2	5	0	H	H4	119	43373	22	CH	C4H4	IVC	SD	43387	0.40625	16.7	43388	0.374306	17	43390	0.376389	17.49	43392	44	0.365278	17.913	4.61228	3.72953	80.8609	1.213	0
238	1664	H	H4	BM05298	2	5	0	C	C4	119	43373	22	CH	C4H4	SC	LQD	43387	0.505556	21.18	43388	0.478472	20.6	43390	0.490972	20.33	43392	44	0.50625	21.574				0.394	0
239	1593	C	C4	BM06053	2	5	0	H	H3	120	43373	22	CH	C4H3	SC	LQD	43387	0.50625	17.62	43388	0.478472	16.13	43390	0.491667	14.67	43392	44	0.507639	14.395				-3.225	0
240	1787	H	H3	BM06795	2	4	0	C	C4	120	43373	22	CH	C4H3	IVC	SD	43387	0.407639	24.29	43388	0.375	24.18	43390	0.377778	25.68	43392	44	0.366667	26.277	5.75227	4.57477	79.5298	1.987	0
241	1594	C	C4	BM06053	2	5	1	H	H1	121	43373	22	CH	C4H1	IVC	SD	43387	0.408333	20.53	43388	0.376389	18.04	43390	0.377778	18.91	43392	44	0.36875	20.101	4.41189	3.26764	74.0644	-0.429	0
242	1707	H	H1	BM06048	2	6	1	C	C4	121	43373	22	CH	C4H1	SC	LQD	43387	0.507639	27.66	43388	0.479167	25.95	43390	0.492361	26	43392	44	0.509722	24.24				-3.42	0
244	1761	C	C3	BM06712	2	5	0	C	C4	122	43373	22	CC	C3C4	IVC	LQD	43387	0.409722	21.76	43388	0.377083	20.24	43390	0.379167	19.91	43392	44	0.370139	20.612	5.41133	3.14808	58.1757	-1.148	0
245	1596	C	C1	BM06557	2	2	0	C	C4	123	43373	22	CC	C1C4	SC	SD	43387	0.509028	16.08	43388	0.479861	16.7	43390	0.493056	16.56	43392	44	0.511111	17.074				0.994	0
246	1605	C	C4	BM04348	2	4	0	C	C1	123	43373	22	CC	C1C4	IVC	SD	43387	0.410417	16.93	43388	0.377778	17.27	43390	0.380556	17.89	43392	44	0.371528	18.379	4.08693	3.30943	80.9759	1.449	0
247	1598	C	C3	BM04373	2	5	1	H	H4	124	43373	22	CH	C3H4	SC	LQD	43387	0.510417	20.5	43388	0.479861	18.65	43390	0.494444	17.53	43392	44	0.5125	17.16				-3.34	0
248	1637	H	H4	BM06563	2	6	1	C	C3	124	43373	22	CH	C3H4	IVC	SD	43387	0.411806	25.62	43388	0.380556	26.39	43390	0.38125	26.91	43392	44	0.373611	27.441	6.54542	5.04442	77.0679	1.821	0
251	1602	C	C3	BM04373	2	5	1	H	H1	126	43373	22	CH	C3H1	IVC	SD	43387	0.4125	20.79	43388	0.38125	20.87	43390	0.381944	21.58	43392	44	0.375	21.86	5.57376	4.27551	76.7078	1.07	0
252	1779	H	H1	BM06560	2	7	1	C	C3	126	43373	22	CH	C3H1	SC	LQD	43387	0.511111	25.31	43388	0.480556	24.12	43390	0.495139	24.8	43392	44	0.513889	25.812				0.502	0
253	1604	C	C4	BM04348	2	4	0	H	H1	127	43373	22	CH	C4H1	IVC	LQD	43387	0.413889	20.01	43388	0.382639	19.74	43390	0.383333	19.95	43392	44	0.376389	19.777	5.30494	3.15319	59.4388	-0.233	0
254	1911	H	H1	BM06876	2	5	0	C	C4	127	43373	21	CH	C4H1	SC	SD	43388	0.490278	17.5	43389	0.479861	17.93	43391	0.436806	18.61	43393	45	0.411111	19.245				1.745	1
258	1781	H	H1	BM06560	2	7	1	H	H4	129	43373	22	HH	H1H4	SC	SD	43387	0.511806	24.41	43388	0.480556	24.87	43390	0.495139	25.38	43392	44	0.515278	26.185				1.775	0
260	1929	C	C4	BM04197	2	5	1	H	H4	130	43373	21	CH	C4H4	SC	LQD	43388	0.490972	21.79	43389	0.479861	19.36	43391	0.436806	17.9	43393	45	0.4125	15.362				-6.428	1
262	1645	C	C2	BM05737	2	8	1	H	H4	131	43373	22	CH	C2H4	SC	SD	43387	0.5125	23.28	43388	0.48125	23.23	43390	0.495833	23.23	43392	44	0.516667	23.144				-0.136	0
263	1644	C	C2	BM05737	2	8	0	H	H3	132	43373	22	CH	C2H3	SC	LQD	43387	0.513194	22.59	43388	0.48125	20.99	43390	0.496528	19.21	43392	44	0.518056	20.28				-2.31	0
264	1775	H	H3	BM06364	2	4	0	C	C2	132	43373	22	CH	C2H3	IVC	SD	43387	0.418056	23.74	43388	0.386111	23.44	43390	0.389583	24.14	43392	44	0.384722	24.832	6.20895	4.84245	77.9914	1.092	0
265	1647	C	C2	BM05737	2	8	1	C	C3	133	43373	22	CC	C2C3	SC	SD	43387	0.513889	28.43	43388	0.481944	28.64	43390	0.496528	29.04	43392	44	0.519444	29.06				0.63	0
266	1765	C	C3	BM06002	2	5	1	C	C2	133	43373	22	CC	C2C3	IVC	LQD	43387	0.41875	18.07	43388	0.3875	16.54	43390	0.395139	16.17	43392	44	0.386111	15.727	4.07933	2.34408	57.4624	-2.343	0
268	1659	H	H2	BM06329	2	5	1	C	C2	134	43373	22	CH	C2H2	SC	LQD	43387	0.514583	27.94	43388	0.481944	26.71	43390	0.497222	26.32	43392	44	0.520833	26.669				-1.271	0
269	1651	C	C2	BM05737	2	8	0	H	H1	135	43373	22	CH	C2H1	IVC	SD	43387	0.421528	20.82	43388	0.389583	22.51	43390	0.397222	22.94	43392	44	0.390278	23.953	5.06703	4.22278	83.3384	3.133	0
270	1783	H	H1	BM06560	2	7	0	C	C2	135	43373	22	CH	C2H1	SC	LQD	43387	0.515278	21.76	43388	0.482639	21.48	43390	0.497917	20.87	43392	44	0.522222	21.555				-0.205	0
272	1759	C	C3	BM06712	2	5	1	H	H2	136	43373	22	CH	C3H2	SC	LQD	43387	0.516667	22.81	43388	0.482639	20.78	43390	0.497917	21.06	43392	44	0.524306	22.038				-0.772	0
273	1661	H	H2	BM06329	2	5	1	H	H1	137	43373	22	HH	H1H2	SC	LQD	43387	0.517361	27.68	43388	0.483333	27.85	43390	0.497917	28.34	43392	44	0.525694	28.539				0.859	0
274	1709	H	H1	BM06048	2	6	1	H	H2	137	43373	22	HH	H1H2	IVC	SD	43387	0.423611	26.33	43388	0.391667	26.27	43390	0.402083	27.07	43392	44	0.394444	26.821	5.08873	4.06848	79.9508	0.491	0
275	1662	H	H2	BM06329	2	5	0	H	H3	138	43373	22	HH	H2H3	SC	SD	43387	0.518056	22.04	43388	0.483333	22.18	43390	0.498611	22.79	43392	44	0.527083	23.007				0.967	0
276	1791	H	H3	BM06845	2	5	0	H	H2	138	43373	22	HH	H2H3	IVC	SD	43387	0.425	17.95	43388	0.393056	19.32	43390	0.403472	20.52	43392	44	0.397222	20.429	5.13387	3.60862	70.2904	2.479	0				1
277	1663	H	H2	BM06329	2	5	0	C	C3	139	43373	22	CH	C3H2	SC	LQD	43387	0.51875	23.58	43388	0.484028	23.14	43390	0.499306	23.64	43392	44	0.528472	24.58				1	0
278	1767	C	C3	BM06002	2	5	0	H	H2	139	43373	22	CH	C3H2	IVC	LQD	43387	0.425694	17.21	43388	0.39375	15.75	43390	0.404167	14.94	43392	44	0.398611	15.401	3.64182	2.18957	60.123	-1.809	0
279	1668	H	H4	BM05298	2	5	0	C	C3	140	43373	22	CH	C3H4	IVC	LQD	43387	0.427083	22.84	43388	0.394444	22.2	43390	0.404861	23.17	43392	44	0.400694	22.213	5.67507	3.24807	57.234	-0.627	0
280	1815	C	C3	BM05957	2	6	0	H	H4	140	43373	21	CH	C3H4	SC	SD	43388	0.491667	16.46	43389	0.480556	16.87	43391	0.4375	17.46	43393	45	0.413889	17.423				0.963	0
281	1706	H	H1	BM06048	2	6	0	C	C3	141	43373	22	CH	C3H1	IVC	SD	43387	0.428472	21.33	43388	0.395139	21.33	43390	0.406944	22.15	43392	44	0.403472	22.295	4.57081	3.81581	83.4821	0.965	0
282	1766	C	C3	BM06002	2	5	0	H	H1	141	43373	22	CH	C3H1	SC	LQD	43387	0.520139	15.83	43388	0.484722	13.85	43390	0.499306	12.41	43392	44	0.529861	12.292				-3.538	0
283	1712	C	C2	BM06752	2	8	0	H	H2	142	43373	22	CH	C2H2	IVC	LQD	43387	0.429167	17.33	43388	0.396528	16.28	43390	0.408333	15.44	43392	44	0.405556	16.537	5.14437	2.78987	54.2315	-0.793	1
284	1864	H	H2	BM05910	2	7	0	C	C2	142	43373	21	CH	C2H2	SC	SD	43388	0.491667	23.46	43389	0.480556	23.61	43391	0.438194	23.96	43393	45	0.415972	24.396				0.936	0
285	1713	C	C2	BM06752	2	8	1	C	C4	143	43373	22	CC	C2C4	IVC	LQD	43387	0.429861	24.15	43388	0.397917	24.15	43390	0.409028	24.53	43392	44	0.406944	25.244	6.46196	3.62321	56.0699	1.094	0
286	1732	C	C4	BM06693	2	6	1	C	C2	143	43373	22	CC	C2C4	SC	SD	43387	0.520833	29.1	43388	0.484722	28.95	43390	0.5	29.19	43392	44	0.53125	30				0.9	0
287	1715	C	C2	BM06752	2	8	0	H	H4	144	43373	22	CH	C2H4	IVC	SD	43387	0.43125	22.32	43388	0.398611	23.09	43390	0.410417	23.9	43392	44	0.409028	23.934	6.16503	4.66078	75.6003	1.614	0
288	1755	H	H4	BM06359	2	4	0	C	C2	144	43373	22	CH	C2H4	SC	LQD	43387	0.521528	20.15	43388	0.485417	20.44	43390	0.500694	18.92	43392	44	0.533333	20.115				-0.035	0
289	1717	C	C2	BM06752	2	8	0	H	H1	145	43373	22	CH	C2H1	IVC	LQD	43387	0.431944	20.87	43388	0.399306	20.16	43390	0.4125	19.09	43392	44	0.410417	18.945	4.07569	2.31719	56.8539	-1.925	0
290	1945	H	H1	BM05270	2	7	0	C	C2	145	43373	21	CH	C2H1	SC	SD	43388	0.492361	23.3	43389	0.48125	25.7	43391	0.438889	25.69	43393	45	0.417361	26.75				3.45	0
291	1718	C	C2	BM06752	2	8	0	C	C3	146	43373	22	CC	C2C3	SC	LQD	43387	0.522222	18.51	43388	0.486111	15.84	43390	0.500694	14.53	43392	44	0.534722	14.221				-4.289	0
292	1758	C	C3	BM06712	2	5	0	C	C2	146	43373	22	CC	C2C3	IVC	SD	43387	0.433333	20.32	43388	0.400694	20.06	43390	0.413194	20.21	43392	44	0.411806	19.659	3.98104	3.28179	82.4355	-0.661	0
293	1725	C	C1	BM05824	2	3	1	H	H1	147	43373	22	CH	C1H1	IVC	LQD	43387	0.434028	22.23	43388	0.401389	21.7	43390	0.414583	21.76	43392	44	0.413194	22.402	5.63071	3.18621	56.5863	0.172	0
294	1910	H	H1	BM05935	2	5	1	C	C1	147	43373	21	CH	C1H1	SC	SD	43388	0.49375	26.19	43389	0.482639	26.16	43391	0.439583	27.22	43393	45	0.41875	26.929				0.739	0
297	1727	C	C1	BM05824	2	3	0	H	H3	149	43373	22	CH	C1H3	IVC	LQD	43387	0.435417	20.98	43388	0.402778	20.22	43390	0.415278	19.94	43392	44	0.414583	21.727	5.93518	3.38718	57.0696	0.747	0
302	1763	C	C3	BM06002	2	5	1	H	H4	151	43373	22	CH	C3H4	SC	SD	43387	0.524306	17.08	43388	0.486806	17.34	43390	0.502778	17.42	43392	44	0.536111	17.938				0.858	0
303	1760	C	C3	BM06712	2	5	0	H	H3	152	43373	22	CH	C3H3	IVC	SD	43387	0.4375	19.36	43388	0.404861	19.93	43390	0.417361	20.52	43392	44	0.41875	20.67	4.79291	3.86566	80.6537	1.31	0
304	1784	H	H3	BM06795	2	4	0	C	C3	152	43373	22	CH	C3H3	SC	SD	43387	0.525	24.87	43388	0.4875	25.88	43390	0.502778	26.26	43392	44	0.5375	26.721				1.851	0
305	1762	C	C3	BM06712	2	5	1	H	H4	153	43373	22	CH	C3H4	IVC	SD	43387	0.438194	24.74	43388	0.405556	25.77	43390	0.41875	25.74	43392	44	0.420139	25.745	5.04367	3.99592	79.2264	1.005	0
306	1796	H	H4	BM06480	2	7	1	C	C3	153	43373	22	CH	C3H4	SC	SD	43387	0.525694	22.58	43388	0.4875	22.78	43390	0.503472	24.08	43392	44	0.538889	23.541				0.961	0
307	1773	H	H3	BM06364	2	4	0	H	H1	154	43373	22	HH	H1H3	IVC	LQD	43387	0.439583	25.21	43388	0.40625	23.48	43390	0.419444	23.16	43392	44	0.422222	23.357	6.13798	3.38423	55.1359	-1.853	0
308	1778	H	H1	BM06560	2	7	0	H	H3	154	43373	22	HH	H1H3	SC	SD	43387	0.526389	22.02	43388	0.488194	21.63	43390	0.503472	22.88	43392	44	0.540972	23.162				1.142	0
309	1776	H	H3	BM06364	2	4	1	H	H4	155	43373	22	HH	H3H4	SC	LQD	43387	0.527083	26.19	43388	0.488194	25.28	43390	0.504167	23.21	43392	44	0.544444	21.351				-4.839	0
310	1795	H	H4	BM06480	2	7	1	H	H3	155	43373	22	HH	H3H4	IVC	LQD	43387	0.440972	23.04	43388	0.406944	22.4	43390	0.420139	22.65	43392	44	0.422917	22.94	6.98482	3.89282	55.7326	-0.1	0
311	1798	H	H4	BM06480	2	7	1	C	C1	156	43373	22	CH	C1H4	SC	LQD	43387	0.527778	22.54	43388	0.488889	21.58	43390	0.504861	21.38	43392	44	0.545833	21.844				-0.696	0
312	1979	C	C1	BM05968	2	6	1	H	H4	156	43373	21	CH	C1H4	IVC	LQD	43388	0.420833	22.29	43389	0.40625	20.29	43391	0.354167	20.26	43393	45	0.361111	19.74	4.76102	2.81077	59.0371	-2.55	0
313	1801	H	H3	BM04824	2	6	0	C	C3	157	43373	22	CH	C3H3	IVC	SD	43387	0.441667	20.7	43388	0.408333	21.13	43390	0.420833	21.55	43392	44	0.425	22.256	4.87767	3.72242	76.3155	1.556	1
314	1818	C	C3	BM05957	2	6	0	H	H3	157	43373	21	CH	C3H3	SC	SD	43388	0.49375	15.96	43389	0.483333	15.91	43391	0.440278	16.34	43393	45	0.420139	16.097				0.137	1
315	1803	H	H3	BM04824	2	6	0	H	H2	158	43373	22	HH	H2H3	SC	LQD	43387	0.529167	22.31	43388	0.488889	21.59	43390	0.504861	19.62	43392	44	0.547917	17.896				-4.414	0
316	1861	H	H2	BM05910	2	7	0	H	H3	158	43373	21	HH	H2H3	IVC	LQD	43388	0.422222	24.55	43389	0.406944	23.52	43391	0.354861	23.77	43393	45	0.363194	24.051	6.39748	3.67298	57.4129	-0.499	0
317	1805	H	H3	BM04824	2	6	0	C	C4	159	43373	22	CH	C4H3	IVC	LQD	43387	0.443056	24.45	43388	0.409028	23.5	43390	0.422222	23.71	43392	44	0.426389	24.718	7.05812	3.95237	55.9975	0.268	0
318	1930	C	C4	BM04197	2	5	0	H	H3	159	43373	21	CH	C4H3	SC	SD	43388	0.494444	20.82	43389	0.483333	20.68	43391	0.440278	21.54	43393	45	0.421528	22.266				1.446	1
319	1808	H	H4	BM06791	2	5	1	C	C4	160	43374	22	CH	C4H4	SC	SD	43388	0.495139	24.85	43389	0.484028	25.69	43391	0.440972	26.47	43393	45	0.423611	26.696				1.846	0
320	2062	C	C4	BM04951	2	6	1	H	H4	160	43374	21	CH	C4H4	IVC	SD	43389	0.4375	24.39	43390	0.425	23.75	43392	0.354861	24.14	43394	46	0.359028	24.919	6.84339	5.01289	73.2515	0.529	0
321	1809	H	H4	BM06791	2	5	0	H	H1	161	43374	22	HH	H1H4	IVC	SD	43388	0.422917	24.54	43389	0.408333	24.62	43391	0.35625	25.02	43393	45	0.364583	26.433	5.6642	4.5597	80.5003	1.893	0
322	1914	H	H1	BM06876	2	5	0	H	H4	161	43374	22	HH	H1H4	SC	LQD	43388	0.495833	18.91	43389	0.484028	18.64	43391	0.441667	18.63	43393	45	0.425	18.954				0.044	1
323	1810	H	H4	BM06791	2	5	1	C	C2	162	43374	22	CH	C2H4	SC	LQD	43388	0.495833	26.44	43389	0.484722	25.11	43391	0.441667	24.7	43393	45	0.425694	24.889				-1.551	0
324	2071	C	C2	BM04641	2	6	1	H	H4	162	43374	21	CH	C2H4	IVC	SD	43389	0.438889	24.66	43390	0.426389	24.95	43392	0.35625	25.81	43394	46	0.361111	26.162	5.85206	4.62031	78.9519	1.502	0
325	1811	H	H4	BM06791	2	5	0	C	C3	163	43374	22	CH	C3H4	SC	LQD	43388	0.496528	23.23	43389	0.484722	23.14	43391	0.442361	22.84	43393	45	0.427083	24.516				1.286	0
326	1984	C	C3	BM06136	2	5	0	H	H4	163	43374	22	CH	C3H4	IVC	LQD	43388	0.423611	20.08	43389	0.409028	18.86	43391	0.356944	19.27	43393	45	0.366667	20.389	5.58883	3.20933	57.424	0.309	0
327	1812	H	H4	BM06791	2	5	0	H	H2	164	43374	22	HH	H2H4	SC	SD	43388	0.497222	20.44	43389	0.485417	20.15	43391	0.442361	20.65	43393	45	0.428472	20.881				0.441	0
328	1862	H	H2	BM05910	2	7	0	H	H4	164	43374	22	HH	H2H4	IVC	SD	43388	0.425	24.58	43389	0.411111	24.43	43391	0.357639	25.12	43393	45	0.368056	25.768				1.188	0
329	1813	C	C3	BM05957	2	6	1	H	H2	165	43374	22	CH	C3H2	SC	SD	43388	0.497917	17.32	43389	0.485417	17.44	43391	0.443056	18.25	43393	45	0.429861	16.515				-0.805	1
330	1892	H	H2	BM05332	2	8	1	C	C3	165	43374	22	CH	C3H2	IVC	SD	43388	0.425694	21.86	43389	0.411806	21.4	43391	0.358333	22.43	43393	45	0.369444	22.748	5.37106	4.30881	80.2227	0.888	0
331	1814	C	C3	BM05957	2	6	1	H	H1	166	43374	22	CH	C3H1	SC	LQD	43388	0.497917	17.31	43389	0.486111	15.76	43391	0.443056	14.69	43393	45	0.43125	15.626				-1.684	0
332	1890	H	H1	BM06496	2	6	1	C	C3	166	43374	22	CH	C3H1	IVC	LQD	43388	0.429167	23.4	43389	0.413194	23.23	43391	0.359722	22.48	43393	45	0.370833	23.32	5.52595	3.17945	57.5367	-0.08	0
333	1817	C	C3	BM05957	2	6	1	C	C4	167	43374	22	CC	C3C4	SC	SD	43388	0.498611	21.06	43389	0.486111	20.6	43391	0.44375	21.8	43393	45	0.432639	22.202				1.142	0
334	1932	C	C4	BM04197	2	5	1	C	C3	167	43374	22	CC	C3C4	IVC	LQD	43388	0.429861	23.53	43389	0.414583	21.79	43391	0.360417	22.73	43393	45	0.372222	22.841	6.51676	3.61076	55.4073	-0.689	1
335	1852	H	H2	BM05924	2	4	0	C	C3	168	43374	22	CH	C3H2	IVC	SD	43388	0.43125	25.11	43389	0.415278	24.63	43391	0.361111	25.64	43393	45	0.374306	26.937				1.827	0
336	1981	C	C3	BM06136	2	5	0	H	H2	168	43374	22	CH	C3H2	SC	SD	43388	0.499306	20.57	43389	0.486806	20.51	43391	0.44375	21.28	43393	45	0.434028	21.481				0.911	0
337	1853	H	H2	BM05924	2	4	1	H	H1	169	43374	22	HH	H1H2	IVC	LQD	43388	0.432639	28.37	43389	0.416667	27.8	43391	0.3625	28.57	43393	45	0.375	29.259	8.30845	4.6187	55.5904	0.889	0
338	1913	H	H1	BM06876	2	5	1	H	H2	169	43374	22	HH	H1H2	SC	SD	43388	0.499306	20.37	43389	0.486806	20.55	43391	0.444444	21.33	43393	45	0.436111	21.796				1.426	1
339	1854	H	H2	BM05924	2	4	1	H	H4	170	43374	22	HH	H2H4	SC	LQD	43388	0.5	25.33	43389	0.4875	23.64	43391	0.444444	23.03	43393	45	0.4375	23.937				-1.393	0
341	1863	H	H2	BM05910	2	7	0	C	C1	171	43374	22	CH	C1H2	IVC	SD	43388	0.434028	24.55	43389	0.41875	24.15	43391	0.364583	24.42	43393	45	0.378472	25.202	5.1476	4.14335	80.4909	0.652	0
342	1976	C	C1	BM05968	2	6	0	H	H2	171	43374	22	CH	C1H2	SC	SD	43388	0.5	19.36	43389	0.4875	19.09	43391	0.445833	18.79	43393	45	0.439583	19.022				-0.338	0
343	1865	H	H2	BM05910	2	7	0	H	H1	172	43374	22	HH	H1H2	IVC	LQD	43388	0.435417	23.7	43389	0.419444	23.34	43391	0.365278	23.13	43393	45	0.379861	24.605	6.28034	3.62609	57.7372	0.905	0
344	1947	H	H1	BM05270	2	7	0	H	H2	172	43374	22	HH	H1H2	SC	SD	43388	0.500694	24.27	43389	0.488194	24.85	43391	0.446528	25.86	43393	45	0.440972	25.696				1.426	0
347	1886	H	H1	BM06496	2	6	1	C	C2	174	43374	22	CH	C2H1	IVC	LQD	43388	0.436111	20.97	43389	0.420833	22.42	43391	0.366667	24.04	43393	45	0.38125	24.126	6.51241	3.68066	56.5176	3.156	0
348	2072	C	C2	BM04641	2	6	1	H	H1	174	43374	21	CH	C2H1	SC	LQD	43389	0.495139	24.46	43390	0.506944	22.11	43392	0.436111	21.33	43394	46	0.4	21.002				-3.458	0
349	1889	H	H1	BM06496	2	6	0	C	C1	175	43374	22	CH	C1H1	IVC	SD	43388	0.4375	23.16	43389	0.422222	23.28	43391	0.367361	24.36	43393	45	0.382639	24.854	5.97231	4.69856	78.6724	1.694	0
350	1975	C	C1	BM05968	2	6	0	H	H1	175	43374	22	CH	C1H1	SC	LQD	43388	0.500694	16.29	43389	0.488194	14.9	43391	0.446528	14.95	43393	45	0.442361	14.726				-1.564	0
353	1893	H	H2	BM05332	2	8	1	H	H1	177	43374	22	HH	H1H2	IVC	SD	43388	0.438194	23.14	43389	0.422917	23.36	43391	0.36875	24.32	43393	45	0.384028	24.676	6.24588	4.73638	75.8321	1.536	0
354	1948	H	H1	BM06875	2	4	1	H	H2	177	43374	22	HH	H1H2	SC	LQD	43388	0.501389	24.96	43389	0.488889	24.83	43391	0.447222	25.57	43393	45	0.44375	26.319				1.359	0
355	1897	H	H2	BM05332	2	8	0	C	C4	178	43374	22	CH	C4H2	SC	LQD	43388	0.502083	19.09	43389	0.488889	18.08	43391	0.447917	18.7	43393	45	0.445833	19.25				0.16	0			1
356	1916	C	C4	BM06536	2	6	0	H	H2	178	43374	22	CH	C4H2	IVC	SD	43388	0.439583	19.58	43389	0.423611	18.87	43391	0.369444	19.87	43393	45	0.385417	20.021	4.57841	3.64441	79.5999	0.441	0
357	1898	H	H2	BM05332	2	8	0	C	C2	179	43374	22	CH	C2H2	IVC	SD	43388	0.440278	22.38	43389	0.425	21.74	43391	0.370833	21.94	43393	45	0.386806	22.259	6.93448	5.21273	75.1712	-0.121	0
358	2073	C	C2	BM04641	2	6	0	H	H2	179	43374	21	CH	C2H2	SC	LQD	43389	0.495833	21.01	43390	0.506944	19.25	43392	0.436806	17.94	43394	46	0.402778	19.661				-1.349	0
359	1915	H	H1	BM06876	2	5	1	H	H3	180	43374	22	HH	H1H3	IVC	SD	43388	0.440972	23.99	43389	0.426389	23.91	43391	0.371528	24.49	43393	45	0.388194	24.816	6.18961	5.09661	82.3414	0.826	1
360	1974	H	H3	BM06886	2	5	1	H	H1	180	43374	22	HH	H1H3	SC	SD	43388	0.502083	19.66	43389	0.489583	19.16	43391	0.447917	19.34	43393	45	0.447222	19.893				0.233	1
361	1917	C	C4	BM06536	2	6	1	C	C3	181	43374	22	CC	C3C4	SC	LQD	43388	0.502778	22.56	43389	0.489583	20.06	43391	0.448611	19.38	43393	45	0.449306	19.677				-2.883	0
362	1983	C	C3	BM06136	2	5	1	C	C4	181	43374	22	CC	C3C4	IVC	LQD	43388	0.442361	20.73	43389	0.427083	20.38	43391	0.372222	19.97	43393	45	0.389583	19.765	4.74328	2.83703	59.8116	-0.965	0
363	1918	C	C4	BM06536	2	6	1	H	H3	182	43374	22	CH	C4H3	SC	SD	43388	0.503472	21.23	43389	0.490278	21.08	43391	0.449306	21.5	43393	45	0.45	21.539				0.309	0
364	1972	H	H3	BM06886	2	5	1	C	C4	182	43374	22	CH	C4H3	IVC	LQD	43388	0.443056	24.29	43389	0.428472	24.78	43391	0.372917	24.86	43393	45	0.390972	25.323	7.3887	4.12495	55.8278	1.033	0
365	1919	C	C4	BM06536	2	6	0	H	H4	183	43374	22	CH	C4H4	SC	LQD	43388	0.503472	18.01	43389	0.490278	16.43	43391	0.449306	14.37	43393	45	0.451389	14.451				-3.559	0
366	1936	H	H4	BM06392	2	8	0	C	C4	183	43374	22	CH	C4H4	IVC	SD	43388	0.444444	21.27	43389	0.429167	21.31	43391	0.374306	21.54	43393	45	0.393056	21.732	6.02364	4.12814	68.5323	0.462	0				1
367	1920	C	C4	BM06536	2	6	0	H	H1	184	43374	22	CH	C4H1	SC	SD	43388	0.503472	19.74	43389	0.490972	19.77	43391	0.45	19.35	43393	45	0.452778	19.433				-0.307	0
368	1951	H	H1	BM06875	2	4	0	C	C4	184	43374	22	CH	C4H1	IVC	LQD	43388	0.445139	23.16	43389	0.430556	23.18	43391	0.375	23.29	43393	45	0.394444	24.053	6.6308	3.8583	58.1875	0.893	0
370	1946	H	H1	BM05270	2	7	0	C	C4	185	43374	22	CH	C4H1	IVC	LQD	43388	0.446528	22.71	43389	0.430556	24.07	43391	0.376389	25.03	43393	45	0.395833	24.214	6.59283	3.90483	59.2284	1.504	0
371	1934	H	H4	BM06392	2	8	0	C	C3	186	43374	22	CH	C3H4	IVC	SD	43388	0.447222	19.62	43389	0.431944	19.79	43391	0.377083	19.28	43393	45	0.397222	19.894	5.47697	3.67597	67.1168	0.274	0				1
372	1997	C	C3	BM05749	2	5	0	H	H4	186	43374	21	CH	C3H4	SC	LQD	43389	0.496528	16.84	43390	0.507639	15.54	43392	0.436806	15.94	43394	46	0.404861	16.043				-0.797	0
373	1935	H	H4	BM06392	2	8	1	H	H3	187	43374	22	HH	H3H4	SC	SD	43388	0.504861	21.32	43389	0.491667	21.28	43391	0.453472	21.31	43393	45	0.454861	22.405				1.085	0
374	1973	H	H3	BM06886	2	5	1	H	H4	187	43374	22	HH	H3H4	IVC	LQD	43388	0.447917	24.31	43389	0.432639	25.45	43391	0.378472	26.69	43393	45	0.398611	27.114	7.26638	4.10688	56.5189	2.804	0
375	1938	H	H4	BM06392	2	8	0	C	C1	188	43374	22	CH	C1H4	SC	SD	43388	0.504861	19.88	43389	0.491667	20.14	43391	0.453472	20.55	43393	45	0.455556	20.042				0.162	0
376	2087	C	C1	BM06439	2	6	0	H	H4	188	43374	21	CH	C1H4	IVC	LQD	43389	0.439583	18.84	43390	0.427083	18.83	43392	0.356944	18.88	43394	46	0.363194	18.804	5.47733	3.09533	56.5117	-0.036	0
377	1939	H	H4	BM06392	2	8	1	H	H1	189	43374	22	HH	H1H4	SC	LQD	43388	0.505556	19.63	43389	0.492361	19.82	43391	0.454167	18.22	43393	45	0.457639	17.347				-2.283	0
378	1950	H	H1	BM06875	2	4	1	H	H4	189	43374	22	HH	H1H4	IVC	LQD	43388	0.449306	23.31	43389	0.433333	23.26	43391	0.379861	23.51	43393	45	0.4	24.152	6.26007	3.59857	57.4845	0.842	1
381	1949	H	H1	BM06875	2	4	1	C	C3	191	43374	22	CH	C3H1	IVC	SD	43388	0.450694	26.58	43389	0.434028	26.02	43391	0.381944	26.74	43393	45	0.403472	27.163	5.13894	4.22644	82.2434	0.583	0
382	1982	C	C3	BM06136	2	5	1	H	H1	191	43374	22	CH	C3H1	SC	SD	43388	0.506944	21.11	43389	0.493056	21.12	43391	0.454861	21.62	43393	45	0.460417	21.386				0.276	0
383	1970	H	H3	BM06886	2	5	1	C	C3	192	43374	22	CH	C3H3	IVC	LQD	43388	0.451389	27.8	43389	0.434722	25.63	43391	0.382639	25.62	43393	45	0.404861	26.045	6.86425	3.93175	57.2787	-1.755	0
384	1999	C	C3	BM05749	2	5	1	H	H3	192	43374	21	CH	C3H3	SC	SD	43389	0.496528	17.38	43390	0.507639	16.94	43392	0.4375	16.9	43394	46	0.407639	16.712				-0.668	0
385	1971	H	H3	BM06886	2	5	1	C	C1	193	43374	22	CH	C1H3	SC	LQD	43388	0.507639	23.55	43389	0.493056	21.41	43391	0.45625	18.32	43393	45	0.461806	17.049				-6.501	0
386	1978	C	C1	BM05968	2	6	1	H	H3	193	43374	22	CH	C1H3	IVC	LQD	43388	0.452778	19.71	43389	0.435417	18.76	43391	0.384028	18.73	43393	45	0.406944	19.604	5.13073	2.87148	55.9663	-0.106	0
387	1977	C	C1	BM05968	2	6	0	C	C3	194	43374	22	CC	C1C3	IVC	LQD	43388	0.453472	17.64	43389	0.436111	17.07	43391	0.384722	17.67	43393	45	0.408333	18.582	6.19316	3.66041	59.1041	0.942	0
388	1985	C	C3	BM06136	2	5	0	C	C1	194	43374	22	CC	C1C3	SC	LQD	43388	0.508333	18.17	43389	0.49375	16.9	43391	0.45625	16.85	43393	45	0.463194	16.316				-1.854	0
389	1980	C	C1	BM05968	2	6	0	C	C2	195	43374	22	CC	C1C2	SC	LQD	43388	0.508333	17.95	43389	0.49375	16.92	43391	0.456944	15.29	43393	45	0.464583	14.889				-3.061	0
390	2069	C	C2	BM04641	2	6	0	C	C1	195	43374	21	CC	C1C2	IVC	SD	43389	0.440278	23.21	43390	0.428472	23.4	43392	0.357639	23.83	43394	46	0.365278	24.131	5.29292	4.35842	82.3443	0.921	0
391	1987	H	H2	BM05634	2	6	1	H	H1	196	43375	22	HH	H1H2	IVC	LQD	43389	0.441667	27.08	43390	0.429167	26.69	43392	0.358333	26.58	43394	46	0.367361	26.914	8.4696	4.60485	54.3692	-0.166	0
392	2082	H	H1	BM06484	2	5	1	H	H2	196	43375	22	HH	H1H2	SC	LQD	43389	0.497222	24.65	43390	0.508333	23.3	43392	0.4375	23.17	43394	46	0.409028	21.893				-2.757	0
393	1988	H	H2	BM05634	2	6	0	H	H3	197	43375	22	HH	H2H3	SC	LQD	43389	0.497222	20.4	43390	0.509028	20.7	43392	0.439583	21.12	43394	46	0.410417	20.276				-0.124	0
394	2174	H	H3	BM05866	2	9	0	H	H2	197	43375	21	HH	H2H3	IVC	SD	43390	0.459028	21.22	43391	0.395833	22.17	43393	0.314583	22.39	43395	47	0.354167	22.364	4.62813	3.72613	80.5105	1.144	0
395	1989	H	H2	BM05634	2	6	1	C	C2	198	43375	22	CH	C2H2	IVC	SD	43389	0.442361	24.46	43390	0.430556	24.67	43392	0.359028	26.56	43394	46	0.370139	25.932	7.3798	5.01905	68.0106	1.472	0				1
396	2116	C	C2	BM06031	2	6	1	H	H2	198	43375	21	CH	C2H2	SC	SD	43390	0.522222	20.68	43391	0.458333	20.94	43393	0.475694	19.91	43395	47	0.476389	19.325				-1.355	0
397	1990	H	H2	BM05634	2	6	0	C	C4	199	43375	22	CH	C4H2	IVC	SD	43389	0.442361	20.88	43390	0.43125	21.41	43392	0.360417	21.22	43394	46	0.371528	22.532	5.35226	4.23576	79.1397	1.652	0
398	2141	C	C4	BM05546	2	5	0	H	H2	199	43375	21	CH	C4H2	SC	SD	43390	0.522917	19.88	43391	0.459028	20.42	43393	0.476389	20.42	43395	47	0.478472	20.622				0.742	1
399	1991	H	H2	BM05634	2	6	0	C	C3	200	43375	22	CH	C3H2	SC	LQD	43389	0.497917	20.15	43390	0.509028	18.69	43392	0.439583	18.96	43394	46	0.4125	17.881				-2.269	0
400	1998	C	C3	BM05749	2	5	0	H	H2	200	43375	22	CH	C3H2	IVC	SD	43389	0.443056	17.9	43390	0.433333	17.24	43392	0.361111	17.24	43394	46	0.373611	16.846	3.50998	2.77848	79.1594	-1.054	0
401	1996	C	C3	BM05749	2	5	0	C	C4	201	43375	22	CC	C3C4	SC	LQD	43389	0.498611	17.88	43390	0.509722	15.65	43392	0.440278	16.66	43394	46	0.414583	17.397				-0.483	0
402	2061	C	C4	BM04951	2	6	0	C	C3	201	43375	22	CC	C3C4	IVC	SD	43389	0.44375	25.07	43390	0.434722	24.71	43392	0.361806	25.65	43394	46	0.375	25.891	5.3572	4.2927	80.1296	0.821	0
403	2000	C	C3	BM05749	2	5	1	C	C1	202	43375	22	CC	C1C3	SC	SD	43389	0.498611	19.33	43390	0.509722	19.52	43392	0.440972	19.5	43394	46	0.417361	19.682				0.352	0
404	2085	C	C1	BM06439	2	6	1	C	C3	202	43375	22	CC	C1C3	IVC	SD	43389	0.444444	19.99	43390	0.435417	19.47	43392	0.363194	20.42	43394	46	0.376389	21.077	4.1255	3.364	81.5416	1.087	0
405	2007	H	H2	BM05819	2	5	1	C	C1	203	43375	22	CH	C1H2	IVC	LQD	43389	0.444444	30.28	43390	0.436111	30.18	43392	0.363889	29.61	43394	46	0.379167	30.079	8.26537	4.60637	55.7309	-0.201	0
406	2088	C	C1	BM06439	2	6	1	H	H2	203	43375	22	CH	C1H2	SC	LQD	43389	0.499306	19.51	43390	0.510417	18.85	43392	0.440972	18.41	43394	46	0.41875	18.495				-1.015	0
407	2008	H	H2	BM05819	2	5	0	C	C2	204	43375	22	CH	C2H2	IVC	LQD	43389	0.445139	26.4	43390	0.4375	26.06	43392	0.364583	26.63	43394	46	0.38125	27.902	7.48404	4.28254	57.2223	1.502	0
408	2149	C	C2	BM05266	2	2	0	H	H2	204	43375	21	CH	C2H2	SC	LQD	43390	0.523611	22.2	43391	0.459028	20.41	43393	0.477083	21.13	43395	47	0.480556	19.815				-2.385	0
409	2009	H	H2	BM05819	2	5	1	C	C4	205	43375	22	CH	C4H2	IVC	LQD	43389	0.446528	26.98	43390	0.438889	27.22	43392	0.365972	27.76	43394	46	0.383333	29.887				2.907	0
410	2064	C	C4	BM04951	2	6	1	H	H2	205	43375	22	CH	C4H2	SC	SD	43389	0.5	24.29	43390	0.511806	24.59	43392	0.441667	25.12	43394	46	0.420139	25.18				0.89	0
411	2010	H	H2	BM05819	2	5	1	C	C3	206	43375	22	CH	C3H2	IVC	LQD	43389	0.447222	26.34	43390	0.439583	26.5	43392	0.366667	27.15	43394	46	0.385417	28.321	7.42683	4.22558	56.8961	1.981	0
412	2157	C	C3	BM06790	2	7	1	H	H2	206	43375	21	CH	C3H2	SC	SD	43390	0.524306	21.13	43391	0.459722	21.42	43393	0.477778	21.74	43395	47	0.482639	22.036				0.906	0
413	2011	H	H2	BM05819	2	5	0	H	H1	207	43375	22	HH	H1H2	IVC	LQD	43389	0.447917	23.14	43390	0.440972	23.15	43392	0.367361	23.86	43394	46	0.386806	22.951	5.99991	3.52241	58.7077	-0.189	0
414	2058	H	H1	BM06513	2	4	0	H	H2	207	43375	22	HH	H1H2	SC	LQD	43389	0.500694	18.61	43390	0.511806	17.71	43392	0.442361	17.35	43394	46	0.422222	16.596				-2.014	0
415	2055	H	H1	BM06513	2	4	0	H	H3	208	43375	22	HH	H1H3	IVC	SD	43389	0.448611	24.1	43390	0.441667	24.08	43392	0.368056	24.59	43394	46	0.388889	25.229	4.47317	3.70067	82.7304	1.129	0
416	2177	H	H3	BM05866	2	9	0	H	H1	208	43375	21	HH	H1H3	SC	LQD	43390	0.525	22.4	43391	0.459722	20.82	43393	0.478472	18.51	43395	47	0.485417	17.357				-5.043	0
417	2056	H	H1	BM06513	2	4	1	C	C3	209	43375	22	CH	C3H1	SC	LQD	43389	0.500694	26.71	43390	0.5125	26.76	43392	0.442361	25.68	43394	46	0.425	26.931				0.221	0
418	2159	C	C3	BM06790	2	7	1	H	H1	209	43375	21	CH	C3H1	IVC	SD	43390	0.459722	22.79	43391	0.397222	23.4	43393	0.315278	23.7	43395	47	0.355556	24.105	5.42139	4.30414	79.3918	1.315	0
419	2057	H	H1	BM06513	2	4	1	C	C2	210	43375	22	CH	C2H1	SC	LQD	43389	0.501389	23.47	43390	0.5125	21.23	43392	0.443056	20.56	43394	46	0.426389	20.165				-3.305	0
420	2117	C	C2	BM06031	2	6	1	H	H1	210	43375	21	CH	C2H1	IVC	SD	43390	0.461111	23.68	43391	0.399306	23.51	43393	0.316667	23.51	43395	47	0.358333	24.65	5.19966	4.09441	78.7438	0.97	0
421	2059	C	C4	BM04951	2	6	1	C	C1	211	43375	22	CC	C1C4	IVC	LQD	43389	0.448611	28.26	43390	0.442361	26.76	43392	0.369444	27.03	43394	46	0.390278	26.63	5.88468	3.32243	56.459	-1.63	0
422	2090	C	C1	BM06439	2	6	1	C	C4	211	43375	22	CC	C1C4	SC	SD	43389	0.502083	17.67	43390	0.513194	18.02	43392	0.44375	17.9	43394	46	0.428472	17.866				0.196	0
423	2060	C	C4	BM04951	2	6	1	C	C2	212	43375	22	CC	C2C4	SC	LQD	43389	0.502083	21.22	43390	0.513889	20.37	43392	0.44375	18.11	43394	46	0.430556	18.643				-2.577	0
424	2070	C	C2	BM04641	2	6	1	C	C4	212	43375	22	CC	C2C4	IVC	LQD	43389	0.45	26.88	43390	0.44375	24.92	43392	0.370139	26.03	43394	46	0.392361	25.425	6.20654	3.56154	57.3837	-1.455	0
425	2063	C	C4	BM04951	2	6	1	H	H1	213	43375	22	CH	C4H1	IVC	LQD	43389	0.45	26.71	43390	0.444444	25.97	43392	0.370833	26.81	43394	46	0.395139	27.086	6.9729	3.98065	57.0874	0.376	0
426	2081	H	H1	BM06484	2	5	1	C	C4	213	43375	22	CH	C4H1	SC	SD	43389	0.502778	25.31	43390	0.515972	25.65	43392	0.444444	26.42	43394	46	0.432639	27.139				1.829	0
427	2074	C	C2	BM04641	2	6	1	H	H3	214	43375	22	CH	C2H3	SC	LQD	43389	0.503472	24.24	43390	0.515972	22.47	43392	0.445139	23.19	43394	46	0.434722	21.103				-3.137	0
428	2110	H	H3	BM06613	2	6	1	C	C2	214	43375	21	CH	C2H3	IVC	LQD	43390	0.461806	20.99	43391	0.4	19.68	43393	0.317361	20.59	43395	47	0.359722	21.885	6.24993	3.37143	53.9435	0.895	1
429	2080	H	H1	BM06484	2	5	0	H	H3	215	43375	22	HH	H1H3	IVC	SD	43389	0.450694	20.44	43390	0.445833	19.81	43392	0.371528	20.34	43394	46	0.396528	20.634	4.88563	3.98538	81.5735	0.194	0
430	2107	H	H3	BM06613	2	6	0	H	H1	215	43375	21	HH	H1H3	SC	SD	43390	0.525	17.55	43391	0.460417	18.12	43393	0.479167	19.03	43395	47	0.486806	19.538				1.988	1
433	2084	H	H1	BM06484	2	5	1	C	C2	217	43375	22	CH	C2H1	SC	SD	43389	0.503472	23.17	43390	0.516667	23.49	43392	0.445139	24.79	43394	46	0.436111	25.302				2.132	0
434	2150	C	C2	BM05266	2	2	1	H	H1	217	43375	21	CH	C2H1	IVC	LQD	43390	0.4625	22.74	43391	0.401389	20.77	43393	0.31875	21.37	43395	47	0.361111	21.59	5.15961	2.97936	57.7439	-1.15	0
435	2086	C	C1	BM06439	2	6	1	C	C2	218	43375	22	CC	C1C2	IVC	SD	43389	0.451389	21.79	43390	0.446528	21.97	43392	0.372222	22.54	43394	46	0.398611	22.849	4.63762	3.74262	80.7013	1.059	0
436	2118	C	C2	BM06031	2	6	1	C	C1	218	43375	21	CC	C1C2	SC	SD	43390	0.525694	22.77	43391	0.460417	22.48	43393	0.479861	22.68	43395	47	0.488889	22.58				-0.19	0
437	2105	C	C4	BM06055	2	2	1	H	H3	219	43376	22	CH	C4H3	IVC	LQD	43390	0.463889	26.48	43391	0.402083	24.21	43393	0.319444	26.87	43395	47	0.363889	25.732	6.8379	3.9059	57.1213	-0.748	0
438	2175	H	H3	BM05866	2	9	1	C	C4	219	43376	22	CH	C4H3	SC	LQD	43390	0.526389	26.43	43391	0.461111	24.79	43393	0.480556	24.38	43395	47	0.490972	25.008				-1.422	0
439	2106	C	C4	BM06055	2	2	1	C	C3	220	43376	22	CC	C3C4	SC	SD	43390	0.527083	24.74	43391	0.4625	25.25	43393	0.48125	25.59	43395	47	0.492361	25.179				0.439	0
440	2154	C	C3	BM06790	2	7	1	C	C4	220	43376	22	CC	C3C4	IVC	LQD	43390	0.465278	23.11	43391	0.402778	21.78	43393	0.320139	21.74	43395	47	0.365972	20.311	5.35056	3.04481	56.9064	-2.799	0
441	2108	H	H3	BM06613	2	6	0	C	C3	221	43376	22	CH	C3H3	IVC	SD	43390	0.465972	18.19	43391	0.403472	18.64	43393	0.321528	19.07	43395	47	0.368056	19.149	4.35398	3.37498	77.5148	0.959	1
442	2160	C	C3	BM06790	2	7	0	H	H3	221	43376	22	CH	C3H3	SC	LQD	43390	0.529167	16.31	43391	0.4625	14.94	43393	0.482639	14.74	43395	47	0.494444	14.467				-1.843	0
443	2112	H	H3	BM06613	2	6	1	C	C4	222	43376	22	CH	C4H3	IVC	LQD	43390	0.467361	24.57	43391	0.404861	23.33	43393	0.322222	23.33	43395	47	0.370833	24.726	6.37868	3.54543	55.5825	0.156	1
444	2139	C	C4	BM05546	2	5	1	H	H3	222	43376	22	CH	C4H3	SC	SD	43390	0.529167	26.1	43391	0.463194	25.81	43393	0.483333	26.49	43395	47	0.496528	26.347				0.247	1
445	2119	C	C2	BM06031	2	6	0	C	C4	223	43376	22	CC	C2C4	SC	SD	43390	0.53125	20.26	43391	0.463194	20.76	43393	0.483333	21.25	43395	47	0.498611	21.262				1.002	0
446	2138	C	C4	BM05546	2	5	0	C	C2	223	43376	22	CC	C2C4	IVC	SD	43390	0.46875	23.67	43391	0.405556	23.61	43393	0.322917	24.93	43395	47	0.372222	25.778	5.40185	4.08235	75.5732	2.108	1
447	2120	C	C2	BM06031	2	6	1	H	H3	224	43376	22	CH	C2H3	IVC	LQD	43390	0.469444	26.4	43391	0.406944	26.15	43393	0.324306	25.25	43395	47	0.375	25.704	6.14232	3.51332	57.1986	-0.696	0
448	2176	H	H3	BM05866	2	9	1	C	C2	224	43376	22	CH	C2H3	SC	LQD	43390	0.531944	23.18	43391	0.463889	22.4	43393	0.484028	21.49	43395	47	0.501389	21.902				-1.278	0
449	2121	C	C2	BM06031	2	6	0	C	C3	225	43376	22	CC	C2C3	SC	LQD	43390	0.532639	19.4	43391	0.464583	15.47	43393	0.484722	16.41	43395	47	0.503472	16.819				-2.581	0
450	2158	C	C3	BM06790	2	7	0	C	C2	225	43376	22	CC	C2C3	IVC	LQD	43390	0.470139	18.03	43391	0.407639	17.46	43393	0.325	17.88	43395	47	0.377083	17.683	5.02442	2.93242	58.3633	-0.347	0
451	2123	C	C4	BM06241	2	5	1	C	C2	226	43376	22	CC	C2C4	IVC	LQD	43390	0.471528	21.67	43391	0.408333	21.89	43393	0.325694	20.9	43395	47	0.379167	20.803	6.07015	3.3209	54.7087	-0.867	1
452	2209	C	C2	BM05639	2	7	1	C	C4	226	43376	21	CC	C2C4	SC	LQD	43391	0.46875	22.31	43392	0.447917	20.38	43394	0.455556	17.83	43396	48	0.465972	15.769				-6.541	0
453	2125	C	C4	BM06241	2	5	0	C	C3	227	43376	22	CC	C3C4	IVC	LQD	43390	0.472222	20.17	43391	0.409722	20.32	43393	0.327083	21.57	43395	47	0.38125	21.16	7.01167	3.91642	55.8557	0.99	1
454	2186	C	C3	BM06618	2	6	0	C	C4	227	43376	21	CC	C3C4	SC	SD	43391	0.469444	15.48	43392	0.447917	15.24	43394	0.45625	15.53	43396	48	0.468056	15.302				-0.178	0
455	2126	C	C4	BM06241	2	5	1	H	H3	228	43376	22	CH	C4H3	IVC	SD	43390	0.472917	22.32	43391	0.410417	21.98	43393	0.327778	22.77	43395	47	0.384028	23.303	5.94315	4.21165	70.8656	0.983	1
456	2187	H	H3	BM04825	2	5	1	C	C4	228	43376	21	CH	C4H3	SC	SD	43391	0.470139	21.88	43392	0.448611	22.11	43394	0.456944	21.69	43396	48	0.469444	22.764				0.884	0
457	2127	C	C4	BM06241	2	5	1	H	H1	229	43376	22	CH	C4H1	SC	SD	43390	0.532639	20.35	43391	0.464583	21	43393	0.485417	21.13	43395	47	0.504861	21.34				0.99	1
458	2167	H	H1	BM06558	2	6	1	C	C4	229	43376	22	CH	C4H1	IVC	SD	43390	0.473611	24.87	43391	0.411111	24.59	43393	0.329167	25.34	43395	47	0.386111	25.752	4.95713	4.09588	82.626	0.882	0
459	2140	C	C4	BM05546	2	5	0	H	H4	230	43376	22	CH	C4H4	IVC	LQD	43390	0.475	19.91	43391	0.411806	18.88	43393	0.329861	18.68	43395	47	0.3875	18.899	4.90656	2.85306	58.1479	-1.011	0
460	2195	H	H4	BM06865	2	5	0	C	C4	230	43376	21	CH	C4H4	SC	LQD	43391	0.470833	18.38	43392	0.448611	17.57	43394	0.457639	18.11	43396	48	0.470833	18.487				0.107	0
463	2155	C	C3	BM06790	2	7	1	H	H4	232	43376	22	CH	C3H4	SC	SD	43390	0.533333	20.33	43391	0.465278	20.73	43393	0.486111	21.17	43395	47	0.506944	21.304				0.974	0
464	2196	H	H4	BM06865	2	5	1	C	C3	232	43376	21	CH	C3H4	IVC	LQD	43391	0.418056	19.7	43392	0.376389	20.26	43394	0.325694	21.28	43396	48	0.35625	21.832	6.48734	3.69509	56.9585	2.132	0
469	2170	H	H1	BM06558	2	6	0	H	H3	235	43376	22	HH	H1H3	SC	SD	43390	0.534028	22.59	43391	0.465972	23.19	43393	0.486111	23.69	43395	47	0.508333	23.951				1.361	0
470	2189	H	H3	BM04825	2	5	0	H	H1	235	43376	21	HH	H1H3	IVC	LQD	43391	0.41875	20.55	43392	0.377778	21.77	43394	0.326389	23.47	43396	48	0.358333	24.558	7.12248	4.14723	58.2274	4.008	0		1
471	2181	C	C3	BM06618	2	6	0	C	C2	236	43377	22	CC	C2C3	IVC	SD	43391	0.420139	17.38	43392	0.378472	17.57	43394	0.327083	17.9	43396	48	0.360417	17.537	4.0993	3.2613	79.5575	0.157	0
472	2208	C	C2	BM05639	2	7	0	C	C3	236	43377	22	CC	C2C3	SC	SD	43391	0.471528	19.47	43392	0.449306	19.23	43394	0.458333	19.37	43396	48	0.473611	19.933				0.463	0
473	2182	C	C3	BM06618	2	6	1	H	H3	237	43377	22	CH	C3H3	IVC	LQD	43391	0.420833	19.28	43392	0.379167	18.48	43394	0.328472	18.11	43396	48	0.3625	18.621	4.90416	2.81016	57.3016	-0.659	0
474	2227	H	H3	BM05184	2	6	1	C	C3	237	43377	22	CH	C3H3	SC	SD	43391	0.472222	22.6	43392	0.449306	23.68	43394	0.458333	24.33	43396	48	0.475	24.986				2.386	0
475	2185	C	C3	BM06618	2	6	1	C	C1	238	43377	22	CC	C1C3	IVC	SD	43391	0.422222	19.72	43392	0.380556	19.55	43394	0.329167	19.34	43396	48	0.363889	19.669	3.82633	3.16408	82.6923	-0.051	0
476	2222	C	C1	BM06744	2	5	1	C	C3	238	43377	22	CC	C1C3	SC	SD	43391	0.472222	24.97	43392	0.45	25.21	43394	0.459722	25.66	43396	48	0.477778	26.333				1.363	0
477	2188	H	H3	BM04825	2	5	0	H	H4	239	43377	22	HH	H3H4	IVC	SD	43391	0.422917	21.68	43392	0.38125	21.05	43394	0.33125	21.53	43396	48	0.366667	21.623	4.54489	3.66739	80.6926	-0.057	0
478	2194	H	H4	BM06865	2	5	0	H	H3	239	43377	22	HH	H3H4	SC	SD	43391	0.472917	19.68	43392	0.450694	19.97	43394	0.459722	20.83	43396	48	0.479861	20.554				0.874	0
481	2191	H	H3	BM04825	2	5	1	C	C1	241	43377	22	CH	C1H3	IVC	SD	43391	0.424306	24.07	43392	0.381944	23.66	43394	0.331944	23.42	43396	48	0.36875	23.938	5.29398	4.30223	81.2665	-0.132	0
482	2218	C	C1	BM06744	2	5	1	H	H3	241	43377	22	CH	C1H3	SC	LQD	43391	0.473611	22.15	43392	0.451389	20.86	43394	0.460417	18.64	43396	48	0.48125	17.249				-4.901	0
483	2192	H	H4	BM06865	2	5	0	H	H1	242	43377	22	HH	H1H4	IVC	SD	43391	0.425	19.05	43392	0.382639	19.85	43394	0.332639	20.15	43396	48	0.370139	20.582	5.08442	4.04317	79.5208	1.532	0
484	2201	H	H1	BM06796	2	7	0	H	H4	242	43377	22	HH	H1H4	SC	LQD	43391	0.475	20.77	43392	0.451389	21.06	43394	0.461111	21.57	43396	48	0.484028	21.571				0.801	0
485	2193	H	H4	BM06865	2	5	0	C	C2	243	43377	22	CH	C2H4	IVC	SD	43391	0.426389	20.48	43392	0.384028	20.51	43394	0.334028	21.68	43396	48	0.373611	22.342	5.78651	4.55026	78.6357	1.862	0
486	2206	C	C2	BM05639	2	7	0	H	H4	243	43377	22	CH	C2H4	SC	SD	43391	0.475694	17.35	43392	0.452083	17.28	43394	0.461806	17.82	43396	48	0.486111	17.196				-0.154	0
487	2197	H	H1	BM06796	2	7	0	C	C1	244	43377	22	CH	C1H1	IVC	LQD	43391	0.427083	21.36	43392	0.384722	22.22	43394	0.334722	22.44	43396	48	0.375	22.304	5.82892	3.43317	58.8989	0.944	0
488	2220	C	C1	BM06744	2	5	0	H	H1	244	43377	22	CH	C1H1	SC	SD	43391	0.475694	20.07	43392	0.452778	20.05	43394	0.4625	19.98	43396	48	0.488194	18.738				-1.332	0
489	2199	H	H1	BM06796	2	7	1	C	C2	245	43377	22	CH	C2H1	IVC	LQD	43391	0.428472	27.77	43392	0.385417	26.88	43394	0.335417	27.75	43396	48	0.377083	29.216	7.21619	4.17719	57.8864	1.446	0
490	2249	C	C2	BM05674	2	6	1	H	H1	245	43377	21	CH	C2H1	SC	SD	43392	0.455556	20.9	43393	0.4875	21.15	43395	0.446528	21.33	43397	49	0.431944	21.518				0.618	0
491	2200	H	H1	BM06796	2	7	1	H	H3	246	43377	22	HH	H1H3	SC	SD	43391	0.477083	24.33	43392	0.452778	24.88	43394	0.463194	25.74	43396	48	0.490278	25.59				1.26	0
492	2226	H	H3	BM05184	2	6	1	H	H1	246	43377	22	HH	H1H3	IVC	LQD	43391	0.429861	24.89	43392	0.386111	23.37	43394	0.336806	22.29	43396	48	0.379167	22.924	5.43758	3.09933	56.9983	-1.966	0
493	2202	H	H1	BM06796	2	7	1	C	C3	247	43377	22	CH	C3H1	IVC	LQD	43391	0.430556	24.63	43392	0.386806	24.56	43394	0.3375	25.33	43396	48	0.38125	25.969	6.48104	3.81154	58.8106	1.339	0
495	2204	C	C2	BM05639	2	7	0	H	H3	248	43377	22	CH	C2H3	IVC	LQD	43391	0.43125	21.55	43392	0.3875	19.19	43394	0.338194	19.84	43396	48	0.383333	19.887	5.00874	2.90174	57.9335	-1.663	0
496	2223	H	H3	BM05184	2	6	0	C	C2	248	43377	22	CH	C2H3	SC	LQD	43391	0.477083	19.24	43392	0.453472	18.48	43394	0.463889	19.98	43396	48	0.491667	17.826				-1.414	0
497	2210	C	C2	BM05639	2	7	0	C	C1	249	43377	22	CC	C1C2	IVC	LQD	43391	0.432639	20.34	43392	0.388889	18.85	43394	0.338889	19.61	43396	48	0.386111	20.288	6.12846	3.50171	57.1385	-0.052	0
498	2219	C	C1	BM06744	2	5	0	C	C2	249	43377	22	CC	C1C2	SC	SD	43391	0.478472	13.7	43392	0.454167	15.17	43394	0.464583	16.91	43396	48	0.49375	16.454				2.754	0
499	2240	C	C1	BM05796	2	5	0	H	H3	250	43378	22	CH	C1H3	IVC	LQD	43392	0.405556	15.73	43393	0.33125	14.69	43395	0.334722	14.65	43397	49	0.369444	15.388	4.35798	2.50023	57.3713	-0.342	0
500	2256	H	H3	BM05198	2	6	0	C	C1	250	43378	22	CH	C1H3	SC	LQD	43392	0.456944	19.72	43393	0.488889	18.27	43395	0.447917	17.07	43397	49	0.434028	17.598				-2.122	0
501	2241	C	C1	BM05796	2	5	0	C	C2	251	43378	22	CC	C1C2	IVC	LQD	43392	0.40625	17.38	43393	0.332639	15.44	43395	0.336111	15.64	43397	49	0.371528	16.378	5.24969	3.01969	57.5213	-1.002	0
502	2250	C	C2	BM05674	2	6	0	C	C1	251	43378	22	CC	C1C2	SC	LQD	43392	0.457639	19.41	43393	0.489583	18.05	43395	0.448611	16.63	43397	49	0.436111	16.984				-2.426	0
503	2243	C	C1	BM05796	2	5	1	C	C3	252	43378	22	CC	C1C3	SC	LQD	43392	0.458333	19	43393	0.490278	18.09	43395	0.449306	15.12	43397	49	0.438194	14.459				-4.541	0
504	2252	C	C3	BM05850	2	3	1	C	C1	252	43378	22	CC	C1C3	IVC	LQD	43392	0.406944	16.05	43393	0.333333	15.31	43395	0.3375	14.81	43397	49	0.373611	15.268	5.54964	2.95464	53.2402	-0.782	1
505	2246	C	C2	BM05674	2	6	1	C	C3	253	43378	22	CC	C2C3	IVC	SD	43392	0.408333	24.87	43393	0.334722	25.41	43395	0.338194	25.81	43397	49	0.375694	26.425	6.40361	4.81986	75.2679	1.555	0
506	2251	C	C3	BM05850	2	3	1	C	C2	253	43378	22	CC	C2C3	SC	SD	43392	0.459028	16.36	43393	0.490972	16.15	43395	0.449306	16.58	43397	49	0.439583	16.373				0.013	1
507	2257	H	H3	BM05198	2	6	0	C	C2	254	43378	22	CH	C2H3	IVC	LQD	43392	0.409028	18.77	43393	0.336111	19.42	43395	0.338889	19.96	43397	49	0.377778	19.871	5.89702	3.32402	56.3678	1.101	0
508	2279	C	C2	BM06769	2	4	0	H	H3	254	43378	21	CH	C2H3	SC	LQD	43393	0.493056	22.95	43394	0.465972	19.65	43396	0.440972	19.21	43398	50	0.438194	19.774				-3.176	0
509	2287	H	H2	BM05330	2	6	1	H	H3	255	43381	22	HH	H2H3	IVC	SD	43395	0.340972	25.86	43396	0.338889	26.07	43398	0.353472	27.23	43400	52	0.376389	27.889	6.89003	5.33678	77.4566	2.029	0
510	2315	H	H3	BM06812	2	3	1	H	H2	255	43381	21	HH	H2H3	SC	LQD	43396	0.442361	19.72	43397	0.449306	18.84	43399	0.449306	18.47	43401	53	0.432639	16.653				-3.067	0
511	2288	H	H2	BM05330	2	6	1	H	H4	256	43381	22	HH	H2H4	IVC	SD	43395	0.341667	29.14	43396	0.340278	29.39	43398	0.354167	29.41	43400	52	0.380556	30.842	8.42881	5.91356	70.1589	1.702	0
512	2310	H	H4	BM05916	2	6	1	H	H2	256	43381	21	HH	H2H4	SC	SD	43396	0.44375	23.1	43397	0.45	22.88	43399	0.45	24.52	43401	53	0.436111	24.132				1.032	0
513	2290	H	H2	BM05330	2	6	0	C	C3	257	43381	22	CH	C3H2	IVC	LQD	43395	0.343056	25.69	43396	0.340972	24.94	43398	0.354861	25.63	43400	52	0.384028	25.771	6.62051	3.80276	57.439	0.081	0
514	2304	C	C3	BM04219	2	6	0	H	H2	257	43381	21	CH	C3H2	SC	SD	43396	0.444444	15.33	43397	0.450694	15.1	43399	0.450694	16.57	43401	53	0.440278	16.453				1.123	0
516	2311	H	H4	BM05916	2	6	0	C	C3	258	43382	22	CH	C3H4	IVC	SD	43396	0.34375	21.92	43397	0.34375	22.11	43399	0.35	22.85	43401	53	0.375694	23.554	4.81841	3.94391	81.8509	1.634	0
519	2309	H	H4	BM05916	2	6	0	C	C4	260	43382	22	CH	C4H4	IVC	SD	43396	0.345139	18.17	43397	0.344444	18.35	43399	0.351389	19.82	43401	53	0.378472	20.543	4.32367	3.60492	83.3764	2.373	0
520	2332	C	C4	BM05732	2	4	0	H	H4	260	43382	21	CH	C4H4	SC	SD	43397	0.453472	21.17	43398	0.447222	20.91	43400	0.441667	21.68	43402	54	0.438889	21.592				0.422	0
521	2314	H	H4	BM05916	2	6	0	C	C1	261	43382	22	CH	C1H4	SC	LQD	43396	0.446528	22.99	43397	0.451389	22.88	43399	0.452083	23.26	43401	53	0.448611	20.659				-2.331	0
522	2334	C	C1	BM06437	2	5	0	H	H4	261	43382	21	CH	C1H4	IVC	SD	43397	0.345833	20.36	43398	0.35625	19.86	43400	0.356944	21.03	43402	54	0.376389	21.647	4.53133	3.69683	81.5838	1.287	0
523	2317	H	H3	BM06812	2	3	0	C	C3	262	43382	22	CH	C3H3	SC	LQD	43396	0.447917	19.99	43397	0.452083	18.79	43399	0.452083	17.96	43401	53	0.556944	18.049				-1.941	0
524	2340	C	C3	BM06103	2	5	0	H	H3	262	43382	21	CH	C3H3	IVC	LQD	43397	0.347222	17	43398	0.357639	16.01	43400	0.357639	16.42	43402	54	0.379861	16.536	4.23353	2.53578	59.8976	-0.464	0
525	2321	C	C3	BM04225	2	4	0	C	C4	263	43383	22	CC	C3C4	IVC	SD	43397	0.348611	18.28	43398	0.358333	17.46	43400	0.359028	18.23	43402	54	0.384722	18.378	4.50253	3.48078	77.3072	0.098	0
526	2331	C	C4	BM05732	2	4	0	C	C3	263	43383	22	CC	C3C4	SC	SD	43397	0.454167	17.7	43398	0.447917	18.16	43400	0.442361	17.86	43402	54	0.442361	17.794				0.094	0
527	2322	C	C3	BM04225	2	4	0	C	C1	264	43383	22	CC	C1C3	IVC	SD	43397	0.350694	17.92	43398	0.360417	18.15	43400	0.359722	18.46	43402	54	0.3875	19.347	4.11784	3.40559	82.7033	1.427	0
528	2335	C	C1	BM06437	2	5	0	C	C3	264	43383	22	CC	C1C3	SC	LQD	43397	0.454861	14.84	43398	0.448611	14.47	43400	0.44375	12.94	43402	54	0.447222	12.932				-1.908	0
529	2333	C	C1	BM06437	2	5	1	C	C4	265	43383	22	CC	C1C4	SC	LQD	43397	0.45625	16.71	43398	0.451389	15.99	43400	0.44375	14.88	43402	54	0.450694	14.697				-2.013	0
530	2357	C	C4	BM04982	2	6	1	C	C1	265	43383	21	CC	C1C4	IVC	SD	43398	0.3625	22.26	43399	0.352778	22.47	43401	0.361806	23.38	43403	55	0.380556	24.188	5.87578	4.10028	69.7827	1.928	1
531	2342	C	C3	BM06103	2	5	1	C	C4	266	43383	22	CC	C3C4	IVC	LQD	43397	0.351389	22.78	43398	0.361806	21.98	43400	0.360417	22.89	43402	54	0.390278	23.014	5.86229	3.35554	57.2394	0.234	0
534	2379	C	C2	BM06297	2	6	0	C	C4	267	43384	21	CC	C2C4	IVC	SD	43399	0.354167	24.19	43400	0.361806	24.01	43402	0.353472	24.95	43404	56	0.385417	25.988	5.49387	4.53762	82.5942	1.798	0
535	2411	C	C3	BM04517	2	8	0	H	H2	268	43389	22	CH	C3H2	SC	LQD	43403	0.44375	17.28	43404	0.444444	15.44	43406	0.448611	13.48	43408	60	0.431944	13.115				-4.165	0
536	2442	H	H2	BM06468	2	6	0	C	C3	268	43389	21	CH	C3H2	IVC	LQD	43404	0.367361	19.33	43405	0.388889	20.07	43407	0.404861	20.18	43409	61	0.405556	20.387	6.03573	3.46448	57.3995	1.057	0
538	2478	H	H3	BM05865	3	5	1	C	C3	269	43389	21	CH	C3H3	IVC	LQD	43404	0.36875	24.5	43405	0.394444	25.75	43407	0.405556	25.99	43409	61	0.409028	25.985	7.25353	4.01653	55.3735	1.485	0
539	2414	C	C3	BM04517	2	8	0	C	C2	270	43389	22	CC	C2C3	SC	SD	43403	0.446528	17.51	43404	0.445833	17.76	43406	0.45	18.38	43408	60	0.436111	18.287				0.777	0
540	2419	C	C2	BM06854	2	6	0	C	C3	270	43389	22	CC	C2C3	IVC	LQD	43403	0.360417	22.17	43404	0.361111	21.1	43406	0.411806	21.29	43408	60	0.406944	21.105	5.52594	3.15594	57.1114	-1.065	0
541	2416	C	C3	BM04517	2	8	1	H	H4	271	43389	22	CH	C3H4	IVC	LQD	43403	0.361806	20.22	43404	0.361806	20.03	43406	0.4125	19.78	43408	60	0.410417	20.057	5.49397	3.31747	60.3838	-0.163	0
542	2484	H	H4	BM04827	3	4	1	C	C3	271	43389	21	CH	C3H4	SC	LQD	43404	0.447917	23.35	43405	0.450694	22.76	43407	0.4375	22.29	43409	61	0.432639	20.62				-2.73	0
543	2417	C	C3	BM04517	2	8	1	H	H1	272	43389	22	CH	C3H1	IVC	LQD	43403	0.363194	19.1	43404	0.361806	17.31	43406	0.413194	16.43	43408	60	0.413889	16.676	4.91853	2.95603	60.0999	-2.424	0
544	2453	H	H1	BM06342	3	3	1	C	C3	272	43389	21	CH	C3H1	SC	SD	43404	0.448611	27.14	43405	0.452083	27.45	43407	0.438194	27.97	43409	61	0.436806	28.516				1.376	0
545	2420	C	C2	BM06854	2	6	0	H	H1	273	43389	22	CH	C2H1	IVC	SD	43403	0.364583	21.33	43404	0.363889	22.12	43406	0.414583	22.42	43408	60	0.418056	22.82	4.70432	3.76782	80.0928	1.49	0
546	2468	H	H1	BM06326	3	4	0	C	C2	273	43389	21	CH	C2H1	SC	LQD	43404	0.448611	18.68	43405	0.452083	17.32	43407	0.438194	17.05	43409	61	0.441667	17.305				-1.375	0
547	2421	C	C2	BM06854	2	6	1	H	H2	274	43389	22	CH	C2H2	IVC	SD	43403	0.365278	23.27	43404	0.365278	24.04	43406	0.415278	23.65	43408	60	0.422222	24.664	6.29221	4.87221	77.4324	1.394	0
548	2440	H	H2	BM06468	2	6	1	C	C2	274	43389	21	CH	C2H2	SC	SD	43404	0.449306	20.95	43405	0.452778	21.79	43407	0.439583	22.31	43409	61	0.445833	22.628				1.678	0
549	2422	C	C2	BM06854	2	6	1	H	H4	275	43389	22	CH	C2H4	SC	LQD	43403	0.446528	23.06	43404	0.446528	19.95	43406	0.450694	19.51	43408	60	0.439583	19.216				-3.844	0
550	2483	H	H4	BM04827	3	4	1	C	C2	275	43389	21	CH	C2H4	IVC	SD	43404	0.369444	13.39	43405	0.395833	14.55	43407	0.40625	16.07	43409	61	0.4125	16.685	4.54209	3.64284	80.2019	3.295	0	1
551	2423	C	C2	BM06854	2	6	0	H	H3	276	43389	22	CH	C2H3	SC	SD	43403	0.447917	18.5	43404	0.446528	17.05	43406	0.450694	18.37	43408	60	0.44375	18.475				-0.025	0
552	2482	H	H3	BM05865	3	5	0	C	C2	276	43389	21	CH	C2H3	IVC	LQD	43404	0.370139	25.5	43405	0.397222	23.61	43407	0.407639	25.52	43409	61	0.415972	25.16	7.31402	4.30677	58.8838	-0.34	0
553	2441	H	H2	BM06468	2	6	1	H	H4	277	43390	22	HH	H2H4	SC	LQD	43404	0.45	22.76	43405	0.453472	22.19	43407	0.439583	21.1	43409	61	0.45	21.836				-0.924	0
554	2603	H	H4	BM06362	2	4	1	H	H2	277	43390	21	HH	H2H4	IVC	SD	43405	0.378472	24.07	43406	0.399306	23.94	43408	0.380556	25.16	43410	62	0.402083	26.393				2.323	1
555	2452	H	H1	BM06342	3	3	0	H	H2	278	43390	22	HH	H1H2	IVC	SD	43404	0.371528	26.06	43405	0.397917	26.54	43407	0.408333	27.18	43409	61	0.420139	28.184	7.61997	5.81297	76.286	2.124	0
556	2566	H	H2	BM05635	3	7	0	H	H1	278	43390	21	HH	H1H2	SC	SD	43405	0.446528	23.41	43406	0.452083	24.06	43408	0.458333	24.52	43410	62	0.445833	24.549				1.139	0
557	2469	H	H1	BM06326	3	4	0	H	H2	279	43390	22	HH	H1H2	SC	SD	43404	0.45	20.47	43405	0.454167	20.7	43407	0.440278	22.23	43409	61	0.454167	22.903				2.433	0
558	2491	H	H2	BM06396	3	4	0	H	H1	279	43390	22	HH	H1H2	IVC	SD	43404	0.372222	17.68	43405	0.398611	19.55	43407	0.409722	19.8	43409	61	0.424306	20.539	5.3949	4.1709	77.3119	2.859	0
561	2564	H	H2	BM05635	3	7	1	H	H4	281	43391	22	HH	H2H4	SC	SD	43405	0.447917	22.61	43406	0.452778	22.87	43408	0.459028	23.45	43410	62	0.45	24.584				1.974	0
562	2579	H	H4	BM06347	3	6	1	H	H2	281	43391	22	HH	H2H4	IVC	LQD	43405	0.379167	26.06	43406	0.400694	26.22	43408	0.38125	25.89	43410	62	0.40625	26.354	7.40994	3.94719	53.2688	0.294	1
564	2713	H	H1	BM06735	3	6	1	H	H4	282	43391	21	HH	H1H4	SC	LQD	43406	0.461806	22.41	43407	0.440972	21.47	43409	0.470139	20.32	43411	63	0.478472	20.5				-1.91	0
565	2602	H	H4	BM06362	2	4	0	C	C1	283	43391	22	CH	C1H4	IVC	LQD	43405	0.382639	19.98	43406	0.402778	19.74	43408	0.383333	20.42	43410	62	0.416667	20.587	6.12882	3.43557	56.0559	0.607	1
566	2751	C	C1	BM06654	2	6	0	H	H4	283	43391	21	CH	C1H4	SC	SD	43406	0.4625	17.55	43407	0.441667	17.65	43409	0.470139	17.13	43411	63	0.480556	17.151				-0.399	0
567	2610	H	H4	BM05192	3	4	1	H	H1	284	43391	22	HH	H1H4	IVC	LQD	43405	0.383333	29.58	43406	0.404167	28.67	43408	0.384028	29.16	43410	62	0.421528	29.401	8.39059	4.46634	53.2304	-0.179	0
568	2759	H	H1	BM06560	3	7	1	H	H4	284	43391	21	HH	H1H4	SC	LQD	43406	0.463194	28.79	43407	0.442361	28.2	43409	0.470833	27.56	43411	63	0.482639	25.07				-3.72	0
569	2611	H	H4	BM05192	3	4	0	C	C4	285	43391	22	CH	C4H4	SC	SD	43405	0.448611	24.45	43406	0.453472	24.81	43408	0.459028	25.24	43410	62	0.454167	25.688				1.238	0
570	2664	C	C4	BM04161	3	6	0	H	H4	285	43391	21	CH	C4H4	IVC	LQD	43406	0.365972	20.37	43407	0.384028	19.79	43409	0.369444	19.17	43411	63	0.390972	20.485	5.66717	3.25442	57.4259	0.115	0
571	2622	H	H3	BM05199	3	6	1	C	C1	286	43391	22	CH	C1H3	IVC	LQD	43405	0.384722	20.55	43406	0.404861	20.29	43408	0.385417	20.51	43410	62	0.427083	20.84	6.24457	3.56232	57.0467	0.29	0
572	2706	C	C1	BM06763	3	5	1	H	H3	286	43391	21	CH	C1H3	SC	SD	43406	0.463889	20.13	43407	0.443056	20.37	43409	0.471528	20.95	43411	63	0.484028	21.518				1.388	0
573	2623	H	H3	BM05199	3	6	0	C	C2	287	43391	22	CH	C2H3	IVC	SD	43405	0.386111	20.48	43406	0.40625	20.83	43408	0.386111	21.27	43410	62	0.430556	21.559	4.75587	3.82762	80.482	1.079	0
574	2745	C	C2	BM04184	3	2	0	H	H3	287	43391	21	CH	C2H3	SC	SD	43406	0.464583	19.07	43407	0.443056	19.26	43409	0.472222	19.25	43411	63	0.486806	19.943				0.873	1
575	2633	C	C2	BM06151	3	4	1	H	H2	288	43392	22	CH	C2H2	IVC	LQD	43406	0.369444	19.97	43407	0.385417	19.98	43409	0.370139	18.96	43411	63	0.393056	18.894	4.82577	2.85277	59.1153	-1.076	0
576	2863	H	H2	BM05689	3	5	1	C	C2	288	43392	21	CH	C2H2	SC	SD	43407	0.454167	28.22	43408	0.460417	27.78	43410	0.471528	29.3	43412	64	0.470139	30.773				2.553	0
577	2634	C	C2	BM06151	3	4	0	H	H1	289	43392	22	CH	C2H1	SC	LQD	43406	0.465972	22.98	43407	0.44375	21.3	43409	0.472917	20.03	43411	63	0.488889	18.567				-4.413	0
578	2846	H	H1	BM06734	3	3	0	C	C2	289	43392	21	CH	C2H1	IVC	SD	43407	0.3625	23.68	43408	0.364583	24.56	43410	0.364583	24.52	43412	64	0.395139	25.778	5.72695	4.6212	80.6922	2.098	0
579	2635	C	C2	BM06151	3	4	1	H	H4	290	43392	22	CH	C2H4	SC	SD	43406	0.466667	26.36	43407	0.444444	26.74	43409	0.472917	26.95	43411	63	0.490278	26.958				0.598	0
580	2740	H	H4	BM06350	3	6	1	C	C2	290	43392	22	CH	C2H4	IVC	LQD	43406	0.370833	19.78	43407	0.386111	19.67	43409	0.370833	21.15	43411	63	0.394444	22.139	6.33332	3.71332	58.6315	2.359	0
581	2645	C	C4	BM04348	3	4	0	H	H3	291	43392	22	CH	C4H3	SC	SD	43406	0.467361	18.28	43407	0.445139	17.62	43409	0.473611	18.1	43411	63	0.492361	17.88				-0.4	0
582	2650	H	H3	BM04844	3	7	0	C	C4	291	43392	22	CH	C4H3	IVC	SD	43406	0.372222	20.66	43407	0.386806	20.49	43409	0.371528	20.81	43411	63	0.396528	21.537	4.52534	3.60259	79.6093	0.877	0
583	2646	C	C4	BM04348	3	4	0	C	C3	292	43392	22	CC	C3C4	IVC	SD	43406	0.373611	18.74	43407	0.388194	19	43409	0.372917	19.5	43411	63	0.398611	19.747	4.40658	3.52758	80.0526	1.007	0
584	2768	C	C3	BM06002	3	5	0	C	C4	292	43392	22	CC	C3C4	SC	LQD	43406	0.467361	17.14	43407	0.445833	15.58	43409	0.474306	14.31	43411	63	0.496528	14.386				-2.754	0
585	2647	C	C4	BM04348	3	4	1	H	H4	293	43392	22	CH	C4H4	SC	SD	43406	0.472917	20.21	43407	0.445833	19.89	43409	0.474306	20.99	43411	63	0.497917	21.741				1.531	0
586	2738	H	H4	BM06350	3	6	1	C	C4	293	43392	22	CH	C4H4	IVC	LQD	43406	0.374306	23.88	43407	0.389583	23.55	43409	0.373611	24.62	43411	63	0.400694	25.074	7.23356	4.13806	57.2064	1.194	0
587	2649	H	H3	BM04844	3	7	1	H	H1	294	43392	22	HH	H1H3	IVC	SD	43406	0.375694	20.98	43407	0.390972	21.55	43409	0.374306	22.86	43411	63	0.402778	23.365	5.53784	4.27834	77.2565	2.385	0
588	2828	H	H1	BM06048	3	5	1	H	H3	294	43392	21	HH	H1H3	SC	LQD	43407	0.454861	28.71	43408	0.460417	26.11	43410	0.472222	25.72	43412	64	0.472222	27.282				-1.428	0
589	2651	H	H3	BM04844	3	7	1	H	H2	295	43392	22	HH	H2H3	IVC	LQD	43406	0.377778	23.85	43407	0.391667	23.44	43409	0.375694	23.12	43411	63	0.404861	24.645	6.69632	3.81757	57.01	0.795	0
591	2652	H	H3	BM04844	3	7	1	C	C3	296	43392	22	CH	C3H3	SC	LQD	43406	0.475	20.92	43407	0.447222	19.93	43409	0.475694	18.16	43411	63	0.502083	18.065				-2.855	0
592	2764	C	C3	BM06002	3	5	1	H	H3	296	43392	22	CH	C3H3	IVC	SD	43406	0.379861	20.42	43407	0.392361	20.06	43409	0.376389	20.69	43411	63	0.407639	21.031	4.63111	3.68261	79.519	0.611	0
593	2653	H	H3	BM04844	3	7	0	C	C1	297	43392	22	CH	C1H3	IVC	LQD	43406	0.38125	17.54	43407	0.39375	16.64	43409	0.377083	17.29	43411	63	0.409722	16.655	4.78248	2.76773	57.8723	-0.885	0
594	2920	C	C1	BM06688	2	4	0	H	H3	297	43392	21	CH	C1H3	SC	SD	43407	0.455556	19.99	43408	0.461111	20.34	43410	0.472917	20.9	43412	64	0.474306	20.877				0.887	0
597	2661	C	C4	BM04161	3	6	0	H	H2	299	43392	22	CH	C4H2	SC	LQD	43406	0.475694	18.13	43407	0.447917	17.2	43409	0.476389	16.17	43411	63	0.504167	17.098				-1.032	0
598	2879	H	H2	BM06329	3	3	0	C	C4	299	43392	21	CH	C4H2	IVC	SD	43407	0.363889	27	43408	0.365278	27.75	43410	0.365278	28.43	43412	64	0.397222	29.089	6.34028	4.94553	78.0018	2.089	0
599	2663	C	C4	BM04161	3	6	0	H	H3	300	43392	22	CH	C4H3	SC	LQD	43406	0.476389	21.1	43407	0.447917	19.31	43409	0.477083	16.54	43411	63	0.506944	16.258				-4.842	0
600	2692	H	H3	BM06820	3	7	0	C	C4	300	43392	22	CH	C4H3	IVC	SD	43406	0.381944	23.59	43407	0.394444	24.15	43409	0.377778	25.33	43411	63	0.4125	25.957	5.87018	4.64118	79.0637	2.367	0
601	2694	H	H3	BM06820	3	7	1	C	C1	301	43392	22	CH	C1H3	IVC	SD	43406	0.383333	23.21	43407	0.395139	24.97	43409	0.378472	25.34	43411	63	0.414583	24.993	5.39476	4.21401	78.113	1.783	0
602	2812	C	C1	BM04482	3	6	1	H	H3	301	43392	21	CH	C1H3	SC	LQD	43407	0.456944	18.92	43408	0.461806	17.08	43410	0.473611	17.42	43412	64	0.475694	16.074				-2.846	0
603	2695	H	H3	BM06820	3	7	1	C	C2	302	43392	22	CH	C2H3	IVC	SD	43406	0.384028	26.89	43407	0.396528	26.97	43409	0.379861	28.21	43411	63	0.416667	28.693	6.25385	4.72985	75.631	1.803	0
604	2840	C	C2	BM04624	3	7	1	H	H3	302	43392	21	CH	C2H3	SC	SD	43407	0.457639	22.15	43408	0.461806	21.85	43410	0.473611	21.82	43412	64	0.477778	21.643				-0.507	0
605	2696	H	H3	BM06820	3	7	1	H	H1	303	43392	22	HH	H1H3	IVC	SD	43406	0.385417	24.48	43407	0.397222	24.47	43409	0.380556	24.82	43411	63	0.418056	25.191	5.0136	3.9636	79.057	0.711	0
606	2718	H	H1	BM06735	3	6	1	H	H3	303	43392	22	HH	H1H3	SC	LQD	43406	0.477778	21.78	43407	0.448611	20.9	43409	0.477778	20	43411	63	0.509028	19.893				-1.887	0
607	2702	H	H2	BM05803	3	6	0	C	C1	304	43392	22	CH	C1H2	IVC	LQD	43406	0.386806	23.05	43407	0.398611	23.38	43409	0.38125	22.54	43411	63	0.420139	22.972	6.11278	3.50278	57.3026	-0.078	0
608	2704	C	C1	BM06763	3	5	0	H	H2	304	43392	22	CH	C1H2	SC	LQD	43406	0.478472	16.69	43407	0.449306	15.6	43409	0.477778	14.43	43411	63	0.510417	15.131				-1.559	0
609	2703	C	C1	BM06763	3	5	1	H	H4	305	43392	22	CH	C1H4	SC	LQD	43406	0.479861	22.11	43407	0.45	20.28	43409	0.478472	19.34	43411	63	0.5125	19.597				-2.513	0
610	2771	H	H4	BM06359	3	5	1	C	C1	305	43392	22	CH	C1H4	IVC	SD	43406	0.388194	26.48	43407	0.399306	26.52	43409	0.381944	27.32	43411	63	0.422222	28.21	5.95983	4.76233	79.9071	1.73	0
611	2714	H	H1	BM06735	3	6	1	C	C3	306	43392	22	CH	C3H1	IVC	SD	43406	0.388889	24.52	43407	0.4	25.46	43409	0.382639	25.77	43411	63	0.425	26.405	5.9658	4.72155	79.1436	1.885	0
612	2875	C	C3	BM06712	3	4	1	H	H1	306	43392	21	CH	C3H1	SC	SD	43407	0.458333	19.84	43408	0.4625	19.03	43410	0.474306	18.98	43412	64	0.479861	18.731				-1.109	0
613	2716	H	H1	BM06735	3	6	0	C	C1	307	43392	22	CH	C1H1	SC	LQD	43406	0.480556	22.78	43407	0.450694	21.14	43409	0.479167	19.37	43411	63	0.515278	20.035				-2.745	0
614	2921	C	C1	BM06688	2	4	0	H	H1	307	43392	21	CH	C1H1	IVC	LQD	43407	0.365278	19.65	43408	0.366667	18.56	43410	0.365972	18.42	43412	64	0.399306	18.453	5.08457	2.94057	57.8332	-1.197	0
617	2725	H	H2	BM05812	3	5	1	C	C1	309	43392	22	CH	C1H2	IVC	SD	43406	0.392361	26.27	43407	0.401389	26.22	43409	0.383333	27.54	43411	63	0.427083	28.523	7.2538	5.5178	76.0677	2.253	0
618	2748	C	C1	BM06654	2	6	1	H	H2	309	43392	22	CH	C1H2	SC	SD	43406	0.481944	20.22	43407	0.451389	21.01	43409	0.479167	21.41	43411	63	0.518056	21.172				0.952	0
619	2727	H	H2	BM05812	3	5	1	C	C3	310	43392	22	CH	C3H2	SC	SD	43406	0.483333	24.78	43407	0.451389	25.57	43409	0.479861	26.05	43411	63	0.519444	26.83				2.05	0
620	2878	C	C3	BM06712	3	4	1	H	H2	310	43392	21	CH	C3H2	IVC	LQD	43407	0.365972	20.98	43408	0.367361	20.41	43410	0.367361	20.41	43412	64	0.401389	20.813	6.24633	3.61783	57.9193	-0.167	0
621	2728	H	H2	BM05812	3	5	1	H	H1	311	43392	22	HH	H1H2	SC	LQD	43406	0.484028	22.89	43407	0.452083	21.32	43409	0.480556	22.16	43411	63	0.522222	23.554				0.664	0
622	2763	H	H1	BM06560	3	7	1	H	H2	311	43392	22	HH	H1H2	IVC	SD	43406	0.39375	22.66	43407	0.402083	23.29	43409	0.384722	23.82	43411	63	0.429167	25.128				2.468	0
623	2742	H	H4	BM06350	3	6	1	C	C3	312	43392	22	CH	C3H4	SC	LQD	43406	0.484722	22.14	43407	0.452778	21.68	43409	0.48125	22.11	43411	63	0.524306	21.089				-1.051	0
624	2766	C	C3	BM06002	3	5	1	H	H4	312	43392	22	CH	C3H4	IVC	LQD	43406	0.394444	19.91	43407	0.402778	19.09	43409	0.385417	18.16	43411	63	0.430556	18.346	4.84923	2.84748	58.7203	-1.564	0
625	2776	C	C4	BM06536	3	6	0	C	C1	313	43393	22	CC	C1C4	SC	LQD	43407	0.459028	18.95	43408	0.463194	17.19	43410	0.475	15.86	43412	64	0.48125	14.608				-4.342	0
626	2922	C	C1	BM06688	2	4	0	C	C4	313	43393	22	CC	C1C4	IVC	LQD	43407	0.367361	20.44	43408	0.368056	20.14	43410	0.368056	18.72	43412	64	0.403472	19.108	5.3324	2.99815	56.2252	-1.332	0
627	2785	C	C1	BM04208	3	6	0	C	C4	314	43393	22	CC	C1C4	SC	SD	43407	0.459722	18.39	43408	0.463889	17.71	43410	0.475694	18.64	43412	64	0.484028	17.968				-0.422	0
628	2939	C	C4	BM04197	3	5	0	C	C1	314	43393	21	CC	C1C4	IVC	SD	43408	0.34375	20.47	43409	0.350694	20.54	43411	0.349306	22.01	43413	65	0.388889	22.318	5.73405	4.0888	71.3073	1.848	1
629	2799	H	H2	BM06491	3	5	0	C	C2	315	43393	22	CH	C2H2	IVC	SD	43407	0.36875	21.42	43408	0.36875	22.21	43410	0.369444	22.05	43412	64	0.404861	22.223	4.90243	3.92718	80.1068	0.803	0
630	3024	C	C2	BM05266	3	5	0	H	H2	315	43393	21	CH	C2H2	SC	SD	43408	0.470139	19.47	43409	0.481944	19.34	43411	0.440278	19.47	43413	65	0.430556	19.149				-0.321	0
631	2800	H	H2	BM06491	3	5	0	H	H1	316	43393	22	HH	H1H2	SC	LQD	43407	0.460417	20.2	43408	0.464583	19.31	43410	0.476389	20.08	43412	64	0.486806	20.633				0.433	0
632	2993	H	H1	BM05935	3	6	0	H	H2	316	43393	21	HH	H1H2	IVC	LQD	43408	0.345833	23.92	43409	0.351389	23.06	43411	0.35	22.37	43413	65	0.390972	22.103	4.75912	2.75262	57.8389	-1.817	0
633	2802	H	H2	BM06491	3	5	1	C	C4	317	43393	22	CH	C4H2	IVC	LQD	43407	0.369444	24.48	43408	0.370139	23.46	43410	0.370139	22.92	43412	64	0.408333	25.746	6.84052	3.86102	56.4433	1.266	0
636	3016	H	H1	BM06513	3	5	0	C	C1	318	43393	21	CH	C1H1	IVC	LQD	43408	0.346528	22.07	43409	0.352778	21.54	43411	0.351389	22.04	43413	65	0.392361	22.288	5.33628	3.10203	58.131	0.218	0
637	2826	H	H1	BM06048	3	5	1	H	H4	319	43393	22	HH	H1H4	SC	SD	43407	0.4625	24.82	43408	0.465972	24.91	43410	0.477778	24.89	43412	64	0.489583	25.946				1.126	0
638	2896	H	H4	BM06563	3	5	1	H	H1	319	43393	22	HH	H1H4	IVC	LQD	43407	0.370833	23.87	43408	0.370833	23.69	43410	0.371528	25.1	43412	64	0.410417	24.878	7.97046	4.43921	55.6958	1.008	0
640	2852	H	H4	BM06388	3	7	0	C	C4	320	43393	22	CH	C4H4	IVC	LQD	43407	0.372222	23.48	43408	0.371528	25.22	43410	0.372917	26.85	43412	64	0.4125	27.442	8.93016	4.90116	54.8832	3.962	0
641	2849	C	C4	BM04231	3	4	0	H	H2	321	43393	22	CH	C4H2	SC	LQD	43407	0.463889	18.07	43408	0.467361	16.16	43410	0.478472	16.82	43412	64	0.491667	15.213				-2.857	1
642	2861	H	H2	BM05689	3	5	0	C	C4	321	43393	22	CH	C4H2	IVC	LQD	43407	0.373611	28.52	43408	0.372917	27.98	43410	0.374306	28.8	43412	64	0.415278	28.888	8.54812	4.66587	54.5836	0.368	0
643	2850	C	C4	BM04231	3	4	1	C	C3	322	43393	22	CC	C3C4	IVC	SD	43407	0.375	23.92	43408	0.373611	24.23	43410	0.375	25.17	43412	64	0.417361	26.297	5.85383	4.34808	74.2775	2.377	1
644	2932	C	C3	BM05303	3	5	1	C	C4	322	43393	21	CC	C3C4	SC	LQD	43408	0.471528	19.41	43409	0.482639	17.77	43411	0.441667	16.79	43413	65	0.435417	16.707				-2.703	0
645	2853	H	H4	BM06388	3	7	1	H	H2	323	43393	22	HH	H2H4	IVC	SD	43407	0.376389	26.95	43408	0.375	27.55	43410	0.375694	27.83	43412	64	0.420139	28.783				1.833	0
646	2880	H	H2	BM06329	3	3	1	H	H4	323	43393	22	HH	H2H4	SC	LQD	43407	0.464583	29.68	43408	0.467361	27.94	43410	0.479167	28.14	43412	64	0.49375	28.294				-1.386	0
647	2855	H	H4	BM06388	3	7	1	H	H1	324	43393	22	HH	H1H4	SC	SD	43407	0.465972	28.42	43408	0.468056	28.62	43410	0.479861	29.99	43412	64	0.496528	30.646				2.226	0
648	3015	H	H1	BM06513	3	5	1	H	H4	324	43393	21	HH	H1H4	IVC	SD	43408	0.347917	25.03	43409	0.353472	25.98	43411	0.352083	26.35	43413	65	0.394444	26.463	5.13212	4.02262	78.3813	1.433	0
649	2859	H	H2	BM05689	3	5	1	H	H4	325	43393	22	HH	H2H4	IVC	LQD	43407	0.377778	26.11	43408	0.375694	26.23	43410	0.377083	26.1	43412	64	0.422222	26.175	7.36297	4.10897	55.8059	0.065	0
650	3001	H	H4	BM06480	3	6	1	H	H2	325	43393	21	HH	H2H4	SC	LQD	43408	0.472222	26.44	43409	0.483333	24.62	43411	0.442361	23.74	43413	65	0.436806	23.578				-2.862	0
651	2860	H	H2	BM05689	3	5	1	C	C3	326	43393	22	CH	C3H2	SC	SD	43407	0.466667	28.79	43408	0.46875	29.27	43410	0.480556	30	43412	64	0.498611	30.44				1.65	0
652	2928	C	C3	BM05303	3	5	1	H	H2	326	43393	21	CH	C3H2	IVC	SD	43408	0.348611	22.51	43409	0.354167	22	43411	0.353472	22.36	43413	65	0.397222	22.728	4.43635	3.6401	82.0517	0.218	0
653	2862	H	H2	BM05689	3	5	1	C	C1	327	43393	22	CH	C1H2	IVC	SD	43407	0.379167	30.51	43408	0.376389	31.17	43410	0.377778	32.47	43412	64	0.425	33.606	8.1896	6.01635	73.4633	3.096	0
654	2957	C	C1	BM05851	3	6	1	H	H2	327	43393	21	CH	C1H2	SC	LQD	43408	0.472917	17.82	43409	0.484028	16.56	43411	0.443056	16.01	43413	65	0.438889	15.536				-2.284	0
655	2876	C	C3	BM06712	3	4	1	C	C1	328	43393	22	CC	C1C3	IVC	LQD	43407	0.379861	23.49	43408	0.377778	22.24	43410	0.379167	22.57	43412	64	0.427778	22.925	6.0852	3.4067	55.9834	-0.565	0
656	2956	C	C1	BM05851	3	6	1	C	C3	328	43393	21	CC	C1C3	SC	SD	43408	0.473611	18.51	43409	0.484722	18.91	43411	0.44375	20.03	43413	65	0.441667	19.67				1.16	0
657	2881	H	H2	BM06329	3	3	1	C	C1	329	43393	22	CH	C1H2	SC	SD	43407	0.467361	28.86	43408	0.46875	28.64	43410	0.48125	29.46	43412	64	0.500694	29.789				0.929	0
658	2919	C	C1	BM06688	2	4	1	H	H2	329	43393	22	CH	C1H2	IVC	LQD	43407	0.38125	19.11	43408	0.379167	17.94	43410	0.379861	18.82	43412	64	0.429861	17.614	4.94989	2.81364	56.8425	-1.496	0
659	2929	C	C3	BM05303	3	5	1	H	H4	330	43394	22	CH	C3H4	IVC	SD	43408	0.349306	25.65	43409	0.354861	25.58	43411	0.354167	25.51	43413	65	0.398611	26.442	5.46407	4.31307	78.9351	0.792	0
660	3029	H	H4	BM06503	3	4	1	C	C3	330	43394	21	CH	C3H4	SC	SD	43409	0.490972	23.65	43410	0.482639	23.94	43412	0.441667	25.15	43414	66	0.438889	25.421				1.771	0
661	2931	C	C3	BM05303	3	5	1	H	H1	331	43394	22	CH	C3H1	IVC	LQD	43408	0.350694	22.23	43409	0.35625	20.78	43411	0.354861	20.52	43413	65	0.401389	20.746	4.89668	2.82543	57.701	-1.484	0
662	3005	H	H1	BM06876	3	5	1	C	C3	331	43394	22	CH	C3H1	SC	SD	43408	0.474306	22.67	43409	0.485417	23.12	43411	0.44375	23.38	43413	65	0.44375	24.16				1.49	1
664	2994	H	H1	BM05935	3	6	1	C	C4	332	43394	22	CH	C4H1	IVC	LQD	43408	0.351389	26.16	43409	0.356944	25.73	43411	0.35625	26.47	43413	65	0.404167	27.256	7.37861	4.19711	56.8821	1.096	0
666	3000	H	H4	BM06480	3	6	1	C	C4	333	43394	22	CH	C4H4	SC	LQD	43408	0.476389	25.71	43409	0.486806	24.99	43411	0.445833	23.68	43413	65	0.446528	23.118				-2.592	0
667	2952	C	C1	BM05851	3	6	0	H	H4	334	43394	22	CH	C1H4	SC	LQD	43408	0.477778	16.64	43409	0.4875	15.42	43411	0.445833	14.95	43413	65	0.449306	14.712				-1.928	0
668	2998	H	H4	BM06480	3	6	0	C	C1	334	43394	22	CH	C1H4	IVC	LQD	43408	0.353472	21.34	43409	0.359028	20.68	43411	0.358333	21.09	43413	65	0.406944	20.466	7.05562	3.73162	52.8886	-0.874	0
669	2953	C	C1	BM05851	3	6	0	C	C4	335	43394	22	CC	C1C4	IVC	SD	43408	0.354861	16.26	43409	0.359722	16.47	43411	0.359722	16.41	43413	65	0.409028	15.405	4.05699	3.30499	81.4641	-0.855	0
670	3063	C	C4	BM06229	2	5	0	C	C1	335	43394	21	CC	C1C4	SC	SD	43409	0.491667	23.03	43410	0.483333	22.84	43412	0.441667	23.14	43414	66	0.440972	22.877				-0.153	0
671	2954	C	C1	BM05851	3	6	0	H	H2	336	43394	22	CH	C1H2	SC	SD	43408	0.478472	16.34	43409	0.488194	16.27	43411	0.446528	15.81	43413	65	0.451389	16.257				-0.083	0
672	2986	H	H2	BM05924	3	6	0	C	C1	336	43394	22	CH	C1H2	IVC	LQD	43408	0.35625	24.06	43409	0.361111	23.61	43411	0.360417	24.52	43413	65	0.410417	24.366	6.93436	3.95936	57.0977	0.306	0
673	2984	H	H2	BM05924	3	6	1	C	C4	337	43394	22	CH	C4H2	SC	SD	43408	0.479861	23.57	43409	0.488889	23.74	43411	0.447222	24.24	43413	65	0.453472	25.415				1.845	0
674	3058	C	C4	BM06241	3	6	1	H	H2	337	43394	21	CH	C4H2	IVC	SD	43409	0.340972	22.99	43410	0.352778	23.12	43412	0.352083	24.13	43414	66	0.376389	24.342	6.33369	4.40994	69.6267	1.352	1
675	2987	H	H2	BM05924	3	6	1	C	C2	338	43394	22	CH	C2H2	IVC	LQD	43408	0.356944	24.26	43409	0.361806	24.07	43411	0.361806	24.4	43413	65	0.413194	25.297	7.72493	4.36318	56.4818	1.037	0
676	3047	C	C2	BM05737	3	7	1	H	H2	338	43394	21	CH	C2H2	SC	SD	43409	0.492361	28.88	43410	0.484028	28.9	43412	0.442361	29.92	43414	66	0.442361	30.339				1.459	0
677	2992	H	H1	BM05935	3	6	0	H	H4	339	43394	22	HH	H1H4	IVC	LQD	43408	0.358333	22.94	43409	0.363194	23.36	43411	0.3625	22.16	43413	65	0.415278	23.294	5.83472	3.38322	57.9843	0.354	0
678	3002	H	H4	BM06480	3	6	0	H	H1	339	43394	22	HH	H1H4	SC	SD	43408	0.479861	21.19	43409	0.488889	21.13	43411	0.447917	22.13	43413	65	0.455556	23.116				1.926	0
679	2999	H	H4	BM06480	3	6	1	C	C2	340	43394	22	CH	C2H4	SC	SD	43408	0.48125	23.28	43409	0.489583	23.51	43411	0.447917	24.24	43413	65	0.458333	24.415				1.135	0
680	3026	C	C2	BM05266	3	5	1	H	H4	340	43394	22	CH	C2H4	IVC	LQD	43408	0.359722	25.8	43409	0.363889	23.73	43411	0.363889	23.73	43413	65	0.417361	23.732	6.90742	3.88942	56.3079	-2.068	0
681	3006	H	H1	BM06876	3	5	1	C	C1	341	43394	22	CH	C1H1	SC	SD	43408	0.481944	22.61	43409	0.490278	22.54	43411	0.448611	23	43413	65	0.459722	23.271				0.661	1
682	3088	C	C1	BM05477	3	3	1	H	H1	341	43394	21	CH	C1H1	IVC	SD	43409	0.341667	23.08	43410	0.354167	22.85	43412	0.353472	23.43	43414	66	0.379167	23.875	5.0436	4.15935	82.4679	0.795	0
683	3018	H	H1	BM06513	3	5	1	C	C4	342	43394	22	CH	C4H1	IVC	LQD	43408	0.360417	26.07	43409	0.365278	24.58	43411	0.364583	25.14	43413	65	0.419444	24.333	6.10331	3.50431	57.4165	-1.737	0
684	3064	C	C4	BM06229	2	5	1	H	H1	342	43394	21	CH	C4H1	SC	LQD	43409	0.493056	26.09	43410	0.484028	23.44	43412	0.443056	22.05	43414	66	0.444444	20.874				-5.216	0
685	3025	C	C2	BM05266	3	5	1	C	C4	343	43394	22	CC	C2C4	IVC	SD	43408	0.361806	21.14	43409	0.365972	21.46	43411	0.365972	21.57	43413	65	0.420833	20.636	4.15799	3.41574	82.1488	-0.504	0
686	3065	C	C4	BM06229	2	5	1	C	C2	343	43394	21	CC	C2C4	SC	SD	43409	0.49375	25.48	43410	0.484722	25.57	43412	0.443056	24.34	43414	66	0.446528	24.805				-0.675	0
687	3027	C	C2	BM05266	3	5	1	C	C3	344	43394	22	CC	C2C3	IVC	LQD	43408	0.3625	23.25	43409	0.366667	21.8	43411	0.366667	21.51	43413	65	0.423611	21.964	5.22394	2.90344	55.5795	-1.286	0
688	3070	C	C3	BM05957	3	7	1	C	C2	344	43394	21	CC	C2C3	SC	SD	43409	0.494444	19.23	43410	0.485417	19.36	43412	0.44375	20.61	43414	66	0.448611	21.223				1.993	0
689	3028	H	H4	BM06503	3	4	1	C	C4	345	43395	22	CH	C4H4	SC	SD	43409	0.495139	21.47	43410	0.486111	21.99	43412	0.444444	22.72	43414	66	0.452083	22.973				1.503	0
690	3059	C	C4	BM06241	3	6	1	H	H4	345	43395	22	CH	C4H4	IVC	LQD	43409	0.343056	22.34	43410	0.354861	21.32	43412	0.354167	19.18	43414	66	0.38125	19.065	4.18571	2.43571	58.1911	-3.275	1
691	3030	H	H4	BM06503	3	4	0	H	H2	346	43395	22	HH	H2H4	IVC	LQD	43409	0.34375	20.81	43410	0.35625	19.82	43412	0.355556	21.04	43414	66	0.384028	20.992	6.21342	3.48917	56.1554	0.182	0
692	3169	H	H2	BM05819	3	6	0	H	H4	346	43395	21	HH	H2H4	SC	SD	43410	0.490278	23.3	43411	0.45	23.35	43413	0.477778	23.88	43415	67	0.457639	24.112				0.812	0
693	3031	H	H4	BM06503	3	4	0	C	C2	347	43395	22	CH	C2H4	SC	SD	43409	0.495833	19.24	43410	0.486111	19.97	43412	0.445139	20.29	43414	66	0.454167	21.022				1.782	0
694	3051	C	C2	BM05737	3	7	0	H	H4	347	43395	22	CH	C2H4	IVC	LQD	43409	0.344444	24.38	43410	0.356944	23.51	43412	0.35625	23.12	43414	66	0.386111	22.488	5.54122	3.20122	57.771	-1.892	0
695	3032	C	C3	BM04373	3	3	0	C	C4	348	43395	22	CC	C3C4	IVC	SD	43409	0.345833	16.61	43410	0.357639	16.61	43412	0.357639	16.5	43414	66	0.3875	16.771	4.15606	3.30831	79.6021	0.161	0
697	3033	C	C3	BM04373	3	3	0	C	C1	349	43395	22	CC	C1C3	IVC	SD	43409	0.346528	18.02	43410	0.359028	18.23	43412	0.358333	18.84	43414	66	0.390278	19.349	4.77396	3.62271	75.8848	1.329	0
699	3060	C	C4	BM06241	3	6	0	H	H1	350	43395	22	CH	C4H1	SC	SD	43409	0.498611	19.12	43410	0.488194	19.99	43412	0.447222	20.44	43414	66	0.45625	20.311				1.191	1
700	3078	H	H1	BM05270	3	4	0	C	C4	350	43395	22	CH	C4H1	IVC	SD	43409	0.347917	27.09	43410	0.359722	27	43412	0.359722	27.64	43414	66	0.392361	28.074	7.09624	5.44499	76.7306	0.984	0
701	3073	C	C3	BM05957	3	7	0	H	H1	351	43395	22	CH	C3H1	IVC	LQD	43409	0.348611	17.92	43410	0.361111	15.93	43412	0.360417	15.35	43414	66	0.394444	15.821	4.46142	2.55817	57.3398	-2.099	0
702	3177	H	H1	BM06484	3	5	0	C	C3	351	43395	21	CH	C3H1	SC	SD	43410	0.490972	20.64	43411	0.45	20.73	43413	0.477778	21.22	43415	67	0.461806	21.784				1.144	0
703	3087	C	C1	BM05477	3	3	0	H	H4	352	43395	22	CH	C1H4	SC	SD	43409	0.499306	20.82	43410	0.488889	21.74	43412	0.447222	21.23	43414	66	0.458333	21.382				0.562	0
704	3118	H	H4	BM06791	3	4	0	C	C1	352	43395	21	CH	C1H4	IVC	SD	43410	0.345139	26.56	43411	0.343056	26.62	43413	0.355556	27.81	43415	67	0.392361	28.275	8.13027	5.77377	71.0157	1.715	0
705	3119	H	H4	BM06791	3	4	0	H	H3	353	43396	22	HH	H3H4	IVC	LQD	43410	0.346528	22.3	43411	0.34375	22.08	43413	0.356944	22.48	43415	67	0.395833	22.847	5.56587	3.25637	58.506	0.547	0
706	3221	H	H3	BM05866	3	3	0	H	H4	353	43396	22	HH	H3H4	SC	SD	43410	0.491667	22.07	43411	0.450694	22.21	43413	0.478472	23.26	43415	67	0.465972	24.031				1.961	0
707	3121	H	H4	BM06791	3	4	1	H	H1	354	43396	22	HH	H1H4	SC	LQD	43410	0.492361	22.13	43411	0.451389	22.24	43413	0.479167	19.66	43415	67	0.469444	18.515				-3.615	0
708	3174	H	H1	BM06484	3	5	1	H	H4	354	43396	22	HH	H1H4	IVC	LQD	43410	0.347222	25.72	43411	0.345139	25.76	43413	0.357639	26.01	43415	67	0.4	27.873	7.30984	4.23659	57.9573	2.153	0
709	3164	H	H2	BM05819	3	6	1	H	H3	355	43396	22	HH	H2H3	IVC	LQD	43410	0.348611	26.15	43411	0.345833	25.19	43413	0.359028	26.3	43415	67	0.403472	27.216	6.72874	3.90599	58.0494	1.066	0
710	3290	H	H3	BM05838	2	6	1	H	H2	355	43396	21	HH	H2H3	SC	LQD	43411	0.454861	23.72	43412	0.448611	23.2	43414	0.472917	21.53	43416	68	0.465278	21.264				-2.456	0
711	3194	C	C4	BM06055	3	4	0	H	H1	356	43396	22	CH	C4H1	IVC	LQD	43410	0.35	23.08	43411	0.346528	22.25	43413	0.359722	22.1	43415	67	0.407639	22.921	6.64821	3.89096	58.5265	-0.159	0
712	3292	H	H1	BM06558	3	4	0	C	C4	356	43396	21	CH	C4H1	SC	LQD	43411	0.455556	23.57	43412	0.449306	22.53	43414	0.473611	21.82	43416	68	0.46875	22.766				-0.804	0
713	3239	C	C2	BM04641	3	4	0	C	C3	357	43396	22	CC	C2C3	IVC	SD	43410	0.350694	23.65	43411	0.347917	24.03	43413	0.361111	24.18	43415	67	0.411111	24.837	4.98265	4.0044	80.3669	1.187	0
715	3249	C	C3	BM05749	3	6	0	H	H1	358	43397	22	CH	C3H1	IVC	SD	43411	0.3375	18.18	43412	0.347917	18.67	43414	0.347917	18.92	43416	68	0.371528	18.726	4.33913	3.26738	75.3004	0.546	0
716	3291	H	H1	BM06558	3	4	0	C	C3	358	43397	22	CH	C3H1	SC	SD	43411	0.457639	22.48	43412	0.45	23.34	43414	0.474306	23.12	43416	68	0.472222	22.497				0.017	0
717	3256	C	C4	BM06696	3	5	0	H	H2	359	43397	22	CH	C4H2	IVC	SD	43411	0.338889	20.95	43412	0.348611	21.31	43414	0.348611	21.31	43416	68	0.375694	21.637	5.11039	3.84739	75.2857	0.687	0
718	3373	H	H2	BM05856	3	1	0	C	C4	359	43397	21	CH	C4H2	SC	LQD	43412	0.456944	17.56	43413	0.480556	17.05	43415	0.446528	15.87	43417	69	0.43125	15.242				-2.318	0
719	3258	C	C4	BM06696	3	5	0	C	C2	360	43397	22	CC	C2C4	SC	LQD	43411	0.458333	21.66	43412	0.450694	19.37	43414	0.475	16.48	43416	68	0.475694	15.066				-6.594	0
720	3366	C	C2	BM06859	2	7	0	C	C4	360	43397	21	CC	C2C4	IVC	LQD	43412	0.339583	21.52	43413	0.348611	19.65	43415	0.372917	20.05	43417	69	0.395833	20.544	5.06129	2.89979	57.2935	-0.976	0
721	3286	H	H3	BM05838	2	6	0	H	H4	361	43397	22	HH	H3H4	IVC	LQD	43411	0.339583	21.81	43412	0.35	21.09	43414	0.349306	21.39	43416	68	0.379861	21.901	6.10998	3.50498	57.3648	0.091	0
722	3315	H	H4	BM06865	3	4	0	H	H3	361	43397	22	HH	H3H4	SC	LQD	43411	0.459028	21.06	43412	0.451389	19.97	43414	0.476389	20.75	43416	68	0.479861	21.62				0.56	0
723	3288	H	H3	BM05838	2	6	1	C	C2	362	43397	22	CH	C2H3	SC	SD	43411	0.459722	25.82	43412	0.452083	26.58	43414	0.477083	27.96	43416	68	0.483333	27.791				1.971	0
724	3364	C	C2	BM06859	2	7	1	H	H3	362	43397	21	CH	C2H3	IVC	SD	43412	0.340972	25.38	43413	0.35	25.79	43415	0.373611	26.07	43417	69	0.399306	26.398	5.79048	4.26448	73.6464	1.018	0
725	3294	H	H1	BM06558	3	4	1	C	C2	363	43397	22	CH	C2H1	IVC	SD	43411	0.340972	31.27	43412	0.350694	30.94	43414	0.350694	33.23	43416	68	0.383333	32.764	8.14936	6.25961	76.8111	1.494	0
726	3369	C	C2	BM06859	2	7	1	H	H1	363	43397	21	CH	C2H1	SC	SD	43412	0.457639	22.02	43413	0.480556	22.13	43415	0.447222	23.08	43417	69	0.434722	23.246				1.226	1			1
727	3316	H	H4	BM06865	3	4	0	H	H2	364	43397	22	HH	H2H4	SC	LQD	43411	0.461111	20.34	43412	0.453472	19.39	43414	0.477778	17.32	43416	68	0.486806	15.984				-4.356	0
728	3351	H	H2	BM05332	3	6	0	H	H4	364	43397	21	HH	H2H4	IVC	LQD	43412	0.341667	22.06	43413	0.350694	21.16	43415	0.375	21.11	43417	69	0.403472	22.039	6.31208	3.65833	57.9576	-0.021	0
729	3318	H	H1	BM06796	3	5	1	C	C4	365	43397	22	CH	C4H1	SC	SD	43411	0.4625	25.5	43412	0.454861	26.03	43414	0.478472	27.6	43416	68	0.490278	28.213				2.713	0
730	3360	C	C4	BM05546	3	5	1	H	H1	365	43397	21	CH	C4H1	IVC	SD	43412	0.343056	27.05	43413	0.352083	27.23	43415	0.375694	28.45	43417	69	0.407639	29.162	6.51269	4.74869	72.9144	2.112	1
731	3348	H	H2	BM05332	3	6	1	C	C4	366	43398	22	CH	C4H2	SC	LQD	43412	0.458333	22.77	43413	0.48125	21.5	43415	0.447917	20.41	43417	69	0.438889	21.119				-1.651	0
732	3361	C	C4	BM05546	3	5	1	H	H2	366	43398	22	CH	C4H2	IVC	LQD	43412	0.345139	22.22	43413	0.352778	21.09	43415	0.377083	19.71	43417	69	0.411806	20.365	4.26747	2.37622	55.6822	-1.855	1
733	3350	H	H2	BM05332	3	6	1	H	H3	367	43398	22	HH	H2H3	SC	SD	43412	0.459722	23.86	43413	0.481944	23.47	43415	0.448611	24.63	43417	69	0.44375	24.29				0.43	0
734	3372	H	H3	BM04825	3	3	1	H	H2	367	43398	22	HH	H2H3	IVC	SD	43412	0.345833	24.82	43413	0.354167	25.31	43415	0.377778	25.54	43417	69	0.415972	26.68	6.45152	4.85677	75.281	1.86	0
735	3349	H	H2	BM05332	3	6	0	H	H3	368	43398	22	HH	H2H3	SC	LQD	43412	0.460417	22.06	43413	0.482639	21.5	43415	0.448611	21.45	43417	69	0.447222	22.97				0.91	0
736	3384	H	H3	BM06613	3	4	0	H	H2	368	43398	21	HH	H2H3	IVC	LQD	43413	0.345833	21.83	43414	0.345833	20.89	43416	0.390972	21.19	43418	70	0.418056	21.588	6.87179	3.74904	54.557	-0.242	1
737	3395	H	H3	BM05198	3	5	1	H	H1	369	43399	22	HH	H1H3	SC	SD	43413	0.483333	25.8	43414	0.479167	26.09	43416	0.44375	26.5	43418	70	0.430556	27.532				1.732	0
738	3401	H	H1	BM05843	3	3	1	H	H3	369	43399	21	HH	H1H3	IVC	LQD	43414	0.340972	25.5	43415	0.368056	25.33	43417	0.370139	26.54	43419	71	0.404167	26.466	7.02879	4.03379	57.3895	0.966	0
739	3398	H	H3	BM05198	3	5	1	C	C3	370	43399	22	CH	C3H3	IVC	SD	43413	0.346528	26.92	43414	0.346528	26.94	43416	0.391667	29.15	43418	70	0.420833	29.928	7.55733	5.73533	75.891	3.008	0
740	3423	C	C3	BM06618	3	5	1	H	H3	370	43399	21	CH	C3H3	SC	LQD	43414	0.480556	21.95	43415	0.45	21.15	43417	0.459028	19.24	43419	71	0.451389	20.015				-1.935	0
741	3399	H	H1	BM05843	3	3	1	C	C1	371	43400	22	CH	C1H1	IVC	LQD	43414	0.342361	24.46	43415	0.369444	24.89	43417	0.370833	25.77	43419	71	0.408333	25.986	6.71993	3.91418	58.2473	1.526	0
742	3436	C	C1	BM05525	2	7	1	H	H1	371	43400	21	CH	C1H1	SC	LQD	43415	0.452778	20.85	43416	0.444444	16.99	43418	0.441667	15.79	43420	72	0.430556	14.533				-6.317	0
743	3400	H	H1	BM05843	3	3	0	C	C3	372	43400	22	CH	C3H1	IVC	LQD	43414	0.343056	20.09	43415	0.370139	20.37	43417	0.371528	21.11	43419	71	0.4125	21.804	6.43991	3.69991	57.4528	1.714	0
744	3424	C	C3	BM06618	3	5	0	H	H1	372	43400	22	CH	C3H1	SC	SD	43414	0.48125	14.95	43415	0.450694	14.7	43417	0.459722	14.57	43419	71	0.454861	14.993				0.043	0
745	3404	C	C2	BM06769	3	5	1	C	C1	373	43400	22	CC	C1C2	SC	SD	43414	0.482639	25.66	43415	0.450694	25.81	43417	0.460417	25.92	43419	71	0.458333	26.511				0.851	0
746	3433	C	C1	BM05525	2	7	1	C	C2	373	43400	21	CC	C1C2	IVC	LQD	43415	0.361806	18.23	43416	0.393056	16.77	43418	0.381944	16.67	43420	72	0.408333	17.154	4.49563	2.49963	55.6013	-1.076	0
747	3405	C	C2	BM06769	3	5	1	C	C3	374	43400	22	CC	C2C3	SC	SD	43414	0.483333	28.33	43415	0.451389	28.82	43417	0.461111	28.91	43419	71	0.4625	29.262				0.932	0
748	3421	C	C3	BM06618	3	5	1	C	C2	374	43400	22	CC	C2C3	IVC	LQD	43414	0.344444	20.1	43415	0.371528	18.72	43417	0.372917	18.68	43419	71	0.415972	19.458	5.12186	2.96761	57.9401	-0.642	0
749	3411	C	C2	BM05536	2	5	0	C	C1	375	43400	22	CC	C1C2	SC	SD	43414	0.484028	22.28	43415	0.452083	22.69	43417	0.461806	22.96	43419	71	0.465278	23.361				1.081	0
750	3435	C	C1	BM05525	2	7	0	C	C2	375	43400	21	CC	C1C2	IVC	LQD	43415	0.363194	17.3	43416	0.394444	15.31	43418	0.383333	15.96	43420	72	0.413194	17.056	4.8151	2.7801	57.7371	-0.244	0
751	3434	C	C1	BM05525	2	7	0	C	C3	376	43401	22	CC	C1C3	IVC	LQD	43415	0.363889	17.66	43416	0.395833	16.93	43418	0.384028	17.15	43420	72	0.417361	16.947	5.3946	3.08585	57.2026	-0.713	0
752	3456	C	C3	BM06103	3	7	0	C	C1	376	43401	21	CC	C1C3	SC	SD	43416	0.445833	17.45	43417	0.4625	17.39	43419	0.436806	17.51	43421	73	0.429167	17.627				0.177	0
753	3443	C	C2	BM05639	3	7	1	H	H2	377	43401	22	CH	C2H2	IVC	LQD	43415	0.365278	24.7	43416	0.396528	23.35	43418	0.385417	24.15	43420	72	0.421528	24.86	6.89729	3.93329	57.0266	0.16	0
754	3461	H	H2	BM05330	3	6	1	C	C2	377	43401	21	CH	C2H2	SC	LQD	43416	0.446528	28.7	43417	0.463194	26.72	43419	0.4375	25.1	43421	73	0.433333	26.937				-1.763	0
755	3441	C	C2	BM05639	3	7	0	C	C3	378	43401	22	CC	C2C3	IVC	LQD	43415	0.366667	19.05	43416	0.397222	17.36	43418	0.386111	17.86	43420	72	0.426389	17.785	4.91959	2.79084	56.7291	-1.265	0
756	3453	C	C3	BM06103	3	7	0	C	C2	378	43401	21	CC	C2C3	SC	LQD	43416	0.447917	18.19	43417	0.463889	17.59	43419	0.438889	16.94	43421	73	0.438194	17.076				-1.114	0
757	3452	C	C3	BM06103	3	7	1	H	H2	379	43402	22	CH	C3H2	SC	LQD	43416	0.448611	19.88	43417	0.463889	18.91	43419	0.439583	17.46	43421	73	0.441667	18.823				-1.057	0
758	3460	H	H2	BM05330	3	6	1	C	C3	379	43402	22	CH	C3H2	IVC	SD	43416	0.399306	25.04	43417	0.374306	25.26	43419	0.38125	26.14	43421	73	0.418056	28.596	7.08779	5.41904	76.456	3.556	0
759	3458	H	H2	BM05330	3	6	1	H	H3	380	43402	22	HH	H2H3	IVC	SD	43416	0.400694	24.76	43417	0.375	25.01	43419	0.382639	25.17	43421	73	0.422222	25.479	4.98206	3.99381	80.1638	0.719	0
760	3466	H	H3	BM06844	2	4	1	H	H2	380	43402	21	HH	H2H3	SC	SD	43417	0.465972	22.2	43418	0.442361	22.35	43420	0.451389	22.77	43422	74	0.457639	24.186				1.986	0
761	3462	H	H2	BM05330	3	6	0	C	C1	381	43402	22	CH	C1H2	SC	LQD	43416	0.449306	23.38	43417	0.464583	22.17	43419	0.439583	23.06	43421	73	0.445833	22.35				-1.03	0
762	3476	C	C1	BM06269	3	7	0	H	H2	381	43402	21	CH	C1H2	IVC	SD	43417	0.376389	17.45	43418	0.3875	16.74	43420	0.377778	17.9	43422	74	0.397917	17.34	4.28736	3.34036	77.9118	-0.11	0
763	3465	H	H3	BM06844	2	4	0	H	H1	382	43403	22	HH	H1H3	SC	SD	43417	0.466667	16.79	43418	0.443056	17.04	43420	0.452083	16.42	43422	74	0.461111	16.979				0.189	0
764	3506	H	H1	BM05826	2	5	0	H	H3	382	43403	21	HH	H1H3	IVC	LQD	43418	0.390278	22.42	43419	0.384028	22.19	43421	0.381944	23.06	43423	75	0.402083	23.125	6.20288	3.53338	56.9636	0.705	0
765	3475	C	C1	BM06269	3	7	1	C	C3	383	43403	22	CC	C1C3	IVC	SD	43417	0.377778	21.15	43418	0.388194	20.78	43420	0.379167	21.17	43422	74	0.402083	21.565	4.55969	3.63919	79.8122	0.415	0
766	3492	C	C3	BM04219	3	7	1	C	C1	383	43403	22	CC	C1C3	SC	LQD	43417	0.467361	24.45	43418	0.44375	23.44	43420	0.452778	22.15	43422	74	0.465278	21.982				-2.468	0
768	3503	H	H1	BM05826	2	5	1	C	C3	384	43403	21	CH	C3H1	IVC	LQD	43418	0.391667	24.54	43419	0.384722	24.99	43421	0.382639	25.25	43423	75	0.405556	25.813	6.62578	3.79653	57.2993	1.273	0
769	3493	C	C3	BM04219	3	7	0	C	C4	385	43403	22	CC	C3C4	SC	SD	43417	0.46875	19.19	43418	0.445139	19.75	43420	0.454167	19.76	43422	74	0.46875	19.865				0.675	0			1
770	3511	C	C4	BM04982	3	5	0	C	C3	385	43403	21	CC	C3C4	IVC	LQD	43418	0.392361	19.03	43419	0.385417	19.53	43421	0.384028	18.84	43423	75	0.409722	18.932	5.92234	3.20209	54.068	-0.098	1
771	3504	H	H1	BM05826	2	5	1	C	C4	386	43404	22	CH	C4H1	IVC	SD	43418	0.39375	24.93	43419	0.386806	24.15	43421	0.384722	25.07	43423	75	0.4125	25.58	6.82608	4.93633	72.3157	0.65	0
772	3508	C	C4	BM04982	3	5	1	H	H1	386	43404	22	CH	C4H1	SC	SD	43418	0.445833	26.16	43419	0.440972	25.98	43421	0.4625	27.25	43423	75	0.457639	25.609				-0.551	1
773	3505	H	H1	BM05826	2	5	1	C	C1	387	43404	22	CH	C1H1	IVC	SD	43418	0.394444	25.69	43419	0.3875	25.64	43421	0.386111	27.13	43423	75	0.415278	27.343	6.13114	4.88939	79.7468	1.653	0
774	3539	C	C1	BM06437	3	6	1	H	H1	387	43404	21	CH	C1H1	SC	SD	43419	0.442361	18.08	43420	0.454861	18.17	43422	0.442361	18.17	43424	76	0.423611	18.729				0.649	0
775	3507	H	H1	BM05826	2	5	1	H	H4	388	43404	22	HH	H1H4	IVC	SD	43418	0.397917	23.26	43419	0.388889	23.24	43421	0.386806	24.03	43423	75	0.417361	23.814	6.14085	4.5621	74.291	0.554	0
776	3546	H	H4	BM06872	3	7	1	H	H1	388	43404	21	HH	H1H4	SC	SD	43419	0.44375	18.18	43420	0.455556	18.16	43422	0.443056	18.5	43424	76	0.427778	19.033				0.853	0
777	3512	C	C4	BM04982	3	5	1	H	H4	389	43404	22	CH	C4H4	SC	SD	43418	0.447222	21.28	43419	0.440972	21.54	43421	0.463194	22.66	43423	75	0.461111	23.466				2.186	1
778	3549	H	H4	BM06872	3	7	1	C	C4	389	43404	21	CH	C4H4	IVC	LQD	43419	0.389583	21.87	43420	0.379861	22	43422	0.369444	22.97	43424	76	0.419444	23.968	6.49682	3.74507	57.6447	2.098	0
779	3544	H	H4	BM06872	3	7	1	H	H2	390	43405	22	HH	H2H4	SC	LQD	43419	0.444444	18.08	43420	0.45625	17.97	43422	0.44375	17.85	43424	76	0.43125	18.936				0.856	0
780	3569	H	H2	BM05907	3	7	1	H	H4	390	43405	21	HH	H2H4	IVC	LQD	43420	0.38125	22.74	43421	0.388194	22.16	43423	0.374306	21.7	43425	77	0.410417	21.762	6.71253	3.65853	54.503	-0.978	0
781	3565	H	H2	BM05907	3	7	0	C	C4	391	43406	22	CH	C4H2	IVC	SD	43420	0.382639	21.74	43421	0.388889	22	43423	0.375	22.47	43425	77	0.415278	23.567				1.827	0
782	3596	C	C4	BM04056	3	6	0	H	H2	391	43406	21	CH	C4H2	SC	SD	43421	0.465278	20.13	43422	0.444444	19.82	43424	0.453472	20.82	43426	78	0.470833	20.83				0.7	0
783	3566	H	H2	BM05907	3	7	0	H	H4	392	43406	22	HH	H2H4	SC	LQD	43420	0.458333	20.3	43421	0.463889	18.52	43423	0.438889	17.58	43425	77	0.427778	16.797				-3.503	0
784	3579	H	H4	BM05929	3	2	0	H	H2	392	43406	22	HH	H2H4	IVC	SD	43420	0.384028	22.46	43421	0.389583	22.82	43423	0.376389	23.55	43425	77	0.419444	23.663	6.60346	4.95796	75.0812	1.203	0
785	3568	H	H2	BM05907	3	7	1	H	H3	393	43406	22	HH	H2H3	IVC	LQD	43420	0.385417	21.73	43421	0.390972	20.54	43423	0.591667	21.86	43425	77	0.423611	21.447	6.14542	3.48667	56.7361	-0.283	0
787	3580	H	H4	BM05929	3	2	1	H	H3	394	43406	22	HH	H3H4	SC	LQD	43420	0.459028	24.34	43421	0.464583	22.9	43423	0.439583	23.43	43425	77	0.43125	24.842				0.502	0			1
788	3618	H	H3	BM06811	3	5	1	H	H4	394	43406	21	HH	H3H4	IVC	SD	43421	0.392361	20.43	43422	0.370139	20.35	43424	0.380556	20.63	43426	78	0.425694	21.319	4.45843	3.56518	79.9649	0.889	0
789	3597	C	C4	BM04056	3	6	1	C	C3	395	43407	22	CC	C3C4	SC	LQD	43421	0.467361	26	43422	0.445833	22.48	43424	0.454861	19.17	43426	78	0.475	18.458				-7.542	0
790	3606	C	C3	BM05651	3	5	1	C	C4	395	43407	22	CC	C3C4	IVC	SD	43421	0.393056	21.65	43422	0.371528	20.92	43424	0.38125	21.27	43426	78	0.429167	21.78	5.31724	4.29174	80.7137	0.13	0
791	3598	C	C4	BM04056	3	6	0	H	H3	396	43407	22	CH	C4H3	IVC	LQD	43421	0.394444	22.04	43422	0.372222	21.21	43424	0.381944	21.3	43426	78	0.433333	21.493	6.28507	3.70557	58.9583	-0.547	0
792	3616	H	H3	BM06811	3	5	0	C	C4	396	43407	22	CH	C4H3	SC	LQD	43421	0.468056	21.81	43422	0.446528	20.32	43424	0.455556	20.4	43426	78	0.479167	19.175				-2.635	0
793	3601	C	C4	BM04056	3	6	0	C	C2	397	43407	22	CC	C2C4	IVC	LQD	43421	0.395833	21.96	43422	0.373611	20.95	43424	0.382639	20.34	43426	78	0.4375	20.425	5.9165	3.395	57.3819	-1.535	0
794	3644	C	C2	BM06306	3	6	0	C	C4	397	43407	21	CC	C2C4	SC	LQD	43422	0.449306	19.1	43423	0.440972	17.72	43425	0.453472	16.34	43427	79	0.450694	13.675				-5.425	0
795	3604	C	C3	BM05651	3	5	1	H	H3	398	43407	22	CH	C3H3	IVC	SD	43421	0.397222	17.6	43422	0.374306	17.31	43424	0.384028	17.14	43426	78	0.440972	17.144	4.15171	3.30846	79.6891	-0.456	0
796	3615	H	H3	BM06811	3	5	1	C	C3	398	43407	22	CH	C3H3	SC	LQD	43421	0.46875	21.23	43422	0.447222	20.29	43424	0.45625	17.79	43426	78	0.482639	17.263				-3.967	0
797	3603	C	C3	BM05651	3	5	1	C	C2	399	43407	22	CC	C2C3	SC	LQD	43421	0.470139	22.04	43422	0.447917	21.04	43424	0.456944	19.91	43426	78	0.486806	19.11				-2.93	0
798	3640	C	C2	BM06306	3	6	1	C	C3	399	43407	21	CC	C2C3	IVC	LQD	43422	0.375694	24.67	43423	0.378472	22.97	43425	0.377083	22.81	43427	79	0.435417	22.205	5.46012	2.93462	53.7465	-2.465	0
799	3605	C	C3	BM05651	3	5	0	H	H3	400	43407	22	CH	C3H3	SC	SD	43421	0.470833	17.89	43422	0.448611	17.44	43424	0.456944	17.31	43426	78	0.490972	17.134				-0.756	0
800	3622	H	H3	BM06367	3	4	0	C	C3	400	43407	21	CH	C3H3	IVC	LQD	43422	0.376389	25.3	43423	0.379861	23.65	43425	0.377778	25.13	43427	79	0.438889	25.94	7.75319	4.35969	56.2309	0.64	0
801	3621	H	H3	BM06367	3	4	1	C	C2	401	43408	22	CH	C2H3	SC	SD	43422	0.450694	26.7	43423	0.441667	26.25	43425	0.454167	26.71	43427	79	0.454861	27.823				1.123	0
802	3643	C	C2	BM06306	3	6	1	H	H3	401	43408	22	CH	C2H3	IVC	SD	43422	0.377778	22.66	43423	0.380556	22.72	43425	0.379167	23.67	43427	79	0.442361	24.263	5.50431	4.24406	77.1043	1.603	0
803	3623	H	H3	BM06367	3	4	0	H	H4	402	43408	22	HH	H3H4	SC	LQD	43422	0.451389	23.7	43423	0.441667	21.81	43425	0.454167	20.39	43427	79	0.457639	19.018				-4.682	0
804	3679	H	H4	BM06362	3	5	0	H	H3	402	43408	21	HH	H3H4	IVC	SD	43423	0.381944	22.26	43424	0.384722	22.28	43426	0.402083	24.21	43428	80	0.398611	23.913	6.09487	4.78962	78.5844	1.653	0
805	3653	H	H1	BM05271	3	6	1	H	H4	403	43409	22	HH	H1H4	SC	SD	43423	0.443056	23.71	43424	0.457639	24.09	43426	0.450694	24.69	43428	80	0.434028	25.025				1.315	0
806	3677	H	H4	BM06362	3	5	1	H	H1	403	43409	22	HH	H1H4	IVC	SD	43423	0.382639	28.09	43424	0.386111	28.19	43426	0.402778	29.06	43428	80	0.403472	28.255	8.33609	5.61634	67.3738	0.165	0				1
807	3654	H	H1	BM05271	3	6	1	C	C2	404	43409	22	CH	C2H1	SC	SD	43423	0.44375	26.87	43424	0.458333	27.46	43426	0.451389	28.14	43428	80	0.4375	28.391				1.521	0
808	3719	C	C2	BM06297	3	2	1	H	H1	404	43409	21	CH	C2H1	IVC	LQD	43424	0.39375	26.44	43425	0.379861	25.07	43427	0.391667	25.26	43429	81	0.413194	26.249	6.14757	3.54932	57.7353	-0.191	0
809	3655	H	H1	BM05271	3	6	0	H	H3	405	43409	22	HH	H1H3	SC	LQD	43423	0.444444	22.17	43424	0.459028	20.7	43426	0.452083	19.83	43428	80	0.440972	18.695				-3.475	0
810	3671	H	H3	BM06795	3	5	0	H	H1	405	43409	22	HH	H1H3	IVC	SD	43423	0.383333	24.55	43424	0.386806	24.19	43426	0.404167	25.07	43428	80	0.408333	25.685	6.06349	4.71374	77.7397	1.135	0
811	3656	H	H1	BM05271	3	6	1	C	C1	406	43409	22	CH	C1H1	SC	LQD	43423	0.445833	23.49	43424	0.459722	20.93	43426	0.452083	20.08	43428	80	0.444444	20.058				-3.432	0
812	3750	C	C1	BM05754	3	6	1	H	H1	406	43409	21	CH	C1H1	IVC	LQD	43424	0.394444	18.18	43425	0.380556	16.15	43427	0.392361	16.24	43429	81	0.417361	17.443	4.7114	2.6559	56.3718	-0.737	0
813	3657	H	H1	BM05271	3	6	1	C	C2	407	43409	22	CH	C2H1	SC	LQD	43423	0.446528	23.74	43424	0.460417	21.19	43426	0.452778	19.32	43428	80	0.447917	17.462				-6.278	0		1
814	3674	C	C2	BM06752	3	4	1	H	H1	407	43409	22	CH	C2H1	IVC	SD	43423	0.384722	25.57	43424	0.388194	25.93	43426	0.404861	27.16	43428	80	0.411806	27.61	6.72404	5.11354	76.0486	2.04	0
815	3658	H	H1	BM05271	3	6	1	H	H2	408	43409	22	HH	H1H2	SC	SD	43423	0.447917	24.56	43424	0.461111	24.84	43426	0.453472	26.11	43428	80	0.452083	26.411				1.851	0
816	3757	H	H2	BM05910	3	3	1	H	H1	408	43409	21	HH	H1H2	IVC	SD	43424	0.395833	30.43	43425	0.382639	31.94	43427	0.393056	33.38	43429	81	0.422222	33.477	8.76348	6.28323	71.6979	3.047	0
817	3665	H	H3	BM06845	3	3	0	H	H4	409	43409	22	HH	H3H4	IVC	LQD	43423	0.385417	23.43	43424	0.388889	21.18	43426	0.405556	21.29	43428	80	0.417361	21.603	5.17058	2.95708	57.1905	-1.827	0
818	3678	H	H4	BM06362	3	5	0	H	H3	409	43409	22	HH	H3H4	SC	LQD	43423	0.448611	21.56	43424	0.461806	19.82	43426	0.454167	18.23	43428	80	0.455556	17.534				-4.026	0
819	3667	H	H3	BM06845	3	3	1	C	C2	410	43409	22	CH	C2H3	SC	LQD	43423	0.449306	23.89	43424	0.4625	22.09	43426	0.454861	19.07	43428	80	0.459028	18.572				-5.318	0
820	3675	C	C2	BM06752	3	4	1	H	H3	410	43409	22	CH	C2H3	IVC	LQD	43423	0.386806	30.89	43424	0.390278	29.68	43426	0.406944	28.71	43428	80	0.420833	30.61				-0.28	0
821	3670	H	H3	BM06795	3	5	0	C	C1	411	43409	22	CH	C1H3	IVC	SD	43423	0.3875	22.99	43424	0.390972	25.06	43426	0.407639	25.67	43428	80	0.424306	26.263	5.74252	4.36452	76.0036	3.273	0
822	3752	C	C1	BM05754	3	6	0	H	H3	411	43409	21	CH	C1H3	SC	LQD	43424	0.464583	16.56	43425	0.455556	14.09	43427	0.468056	13.51	43429	81	0.461111	13.156				-3.404	0
823	3673	C	C2	BM06752	3	4	1	H	H3	412	43409	22	CH	C2H3	SC	SD	43423	0.45	26.85	43424	0.463194	26.6	43426	0.455556	26.53	43428	80	0.461806	26.771				-0.079	0
824	3764	H	H3	BM06886	3	6	1	C	C2	412	43409	21	CH	C2H3	IVC	LQD	43424	0.397222	23.5	43425	0.383333	24.05	43427	0.394444	23.85	43429	81	0.427083	23.85	6.11049	3.42424	56.0387	0.35	0
825	3676	C	C2	BM06752	3	4	1	C	C1	413	43409	22	CC	C1C2	SC	LQD	43423	0.451389	28.94	43424	0.463889	25.9	43426	0.455556	26.07	43428	80	0.465278	26.419				-2.521	0
826	3774	C	C1	BM06245	3	4	1	C	C2	413	43409	21	CC	C1C2	IVC	LQD	43424	0.397917	18.51	43425	0.384028	17.02	43427	0.395833	17.62	43429	81	0.432639	17.404	4.93039	2.90764	58.9738	-1.106	0
827	3681	H	H4	BM06362	3	5	1	C	C1	414	43409	22	CH	C1H4	IVC	LQD	43423	0.388194	25.53	43424	0.392361	25.37	43426	0.408333	25.41	43428	80	0.427778	25.294	8.61598	4.50323	52.266	-0.236	0
828	3751	C	C1	BM05754	3	6	1	H	H4	414	43409	21	CH	C1H4	SC	SD	43424	0.465278	21.64	43425	0.45625	21.37	43427	0.46875	21.66	43429	81	0.465972	21.59				-0.05	0
829	3720	C	C2	BM06297	3	2	1	C	C1	415	43410	22	CC	C1C2	IVC	LQD	43424	0.399306	25.44	43425	0.385417	24.09	43427	0.397222	23.5	43429	81	0.436111	24.531	5.35721	3.05296	56.9879	-0.909	0
830	3772	C	C1	BM06245	3	4	1	C	C2	415	43410	22	CC	C1C2	SC	SD	43424	0.465972	20.01	43425	0.456944	20.47	43427	0.469444	21.14	43429	81	0.470139	21.367				1.357	0
831	3755	C	C1	BM05754	3	6	1	C	C3	416	43410	22	CC	C1C3	SC	LQD	43424	0.466667	20.25	43425	0.457639	17.44	43427	0.470139	17.56	43429	81	0.475	17.924				-2.326	0
832	3796	C	C3	BM04517	3	6	1	C	C1	416	43410	21	CC	C1C3	IVC	SD	43425	0.386806	22.54	43426	0.397917	22.56	43428	0.386111	22.31	43430	82	0.397917	22.709	4.661	3.73	80.0258	0.169	0
833	3756	H	H2	BM05910	3	3	0	C	C3	417	43410	22	CH	C3H2	SC	SD	43424	0.467361	23.23	43425	0.458333	23.29	43427	0.470833	23.77	43429	81	0.479167	24.624				1.394	0
834	3793	C	C3	BM04517	3	6	0	H	H2	417	43410	21	CH	C3H2	IVC	LQD	43425	0.388194	19.64	43426	0.399306	18.42	43428	0.3875	18.2	43430	82	0.402778	18.337	4.92446	2.89146	58.7163	-1.303	0
837	3763	H	H3	BM06886	3	6	1	C	C1	419	43410	22	CH	C1H3	SC	LQD	43424	0.46875	23.7	43425	0.459722	21.95	43427	0.471528	20.3	43429	81	0.483333	21.698				-2.002	0
838	3773	C	C1	BM06245	3	4	1	H	H3	419	43410	22	CH	C1H3	IVC	SD	43424	0.400694	20.35	43425	0.386111	21.17	43427	0.4	21.42	43429	81	0.440278	22.286	4.74113	3.85263	81.2597	1.936	0
839	3795	C	C3	BM04517	3	6	0	H	H4	420	43411	22	CH	C3H4	SC	SD	43425	0.460417	19.78	43426	0.456944	19.61	43428	0.458333	19.42	43430	82	0.4625	19.365				-0.415	0
840	3888	H	H4	BM05298	3	4	0	C	C3	420	43411	21	CH	C3H4	IVC	LQD	43426	0.388889	27.09	43427	0.402778	26.64	43429	0.375694	28.35	43431	83	0.40625	27.913	7.9422	4.5417	57.1844	0.823	0
841	3810	H	H3	BM04824	3	5	0	C	C1	421	43411	22	CH	C1H3	IVC	LQD	43425	0.388889	22.46	43426	0.4	20.57	43428	0.389583	20.85	43430	82	0.406944	21.528	5.94191	3.40566	57.3159	-0.932	0
842	3884	C	C1	BM05968	3	6	0	H	H3	421	43411	21	CH	C1H3	SC	SD	43426	0.459028	20.46	43427	0.479167	20.47	43429	0.449306	20.29	43431	83	0.445139	20.842				0.382	0
843	3811	H	H3	BM04824	3	5	1	C	C3	422	43411	22	CH	C3H3	SC	SD	43425	0.461111	25.9	43426	0.457639	26.12	43428	0.459028	27.63	43430	82	0.467361	28.093				2.193	0
844	3858	C	C3	BM06136	3	6	1	H	H3	422	43411	21	CH	C3H3	IVC	LQD	43426	0.390278	19.47	43427	0.403472	18.48	43429	0.376389	17.77	43431	83	0.410417	17.276	3.78872	2.16672	57.1888	-2.194	0
845	3813	H	H3	BM04824	3	5	1	C	C4	423	43411	22	CH	C4H3	IVC	SD	43425	0.389583	23.87	43426	0.400694	23.9	43428	0.390972	24.8	43430	82	0.411111	25.554	5.49096	4.33796	79.0019	1.684	0
846	3891	C	C4	BM06053	3	5	1	H	H3	423	43411	21	CH	C4H3	SC	LQD	43426	0.459722	22.47	43427	0.479861	20.16	43429	0.45	19.58	43431	83	0.449306	20.98				-1.49	0
847	3814	H	H3	BM04824	3	5	0	H	H4	424	43411	22	HH	H3H4	SC	SD	43425	0.461806	20.46	43426	0.457639	20.32	43428	0.460417	20.78	43430	82	0.470833	21.473				1.013	0
848	3890	H	H4	BM05298	3	4	0	H	H3	424	43411	21	HH	H3H4	IVC	LQD	43426	0.390972	21.02	43427	0.404861	20.09	43429	0.377778	21.26	43431	83	0.415972	21.797	6.4404	3.7359	58.0073	0.777	0
849	3855	C	C3	BM06136	3	6	0	C	C4	425	43412	22	CC	C3C4	IVC	SD	43426	0.392361	19.62	43427	0.405556	19.44	43429	0.378472	19.33	43431	83	0.420139	19.779	4.42698	3.50148	79.0941	0.159	0			1
850	3893	C	C4	BM06053	3	5	0	C	C3	425	43412	22	CC	C3C4	SC	LQD	43426	0.460417	18.06	43427	0.480556	16.9	43429	0.450694	15.74	43431	83	0.453472	14.661				-3.399	0
851	3856	C	C3	BM06136	3	6	1	C	C2	426	43412	22	CC	C2C3	IVC	SD	43426	0.393056	19.6	43427	0.40625	19.43	43429	0.379167	19.41	43431	83	0.424306	19.4	4.08403	3.25928	79.8055	-0.2	0			1
852	3908	C	C2	BM06854	3	3	1	C	C3	426	43412	21	CC	C2C3	SC	LQD	43427	0.472917	22.14	43428	0.4625	20.11	43430	0.446528	19.17	43432	84	0.433333	19.389				-2.751	0
853	3857	C	C3	BM06136	3	6	0	C	C1	427	43412	22	CC	C1C3	IVC	LQD	43426	0.394444	21.13	43427	0.406944	20.48	43429	0.379861	19.84	43431	83	0.429167	19.708	4.77306	2.77431	58.1244	-1.422	0
854	3958	C	C1	BM06654	3	4	0	C	C3	427	43412	21	CC	C1C3	SC	SD	43427	0.474306	16.13	43428	0.4625	16.64	43430	0.447222	16.77	43432	84	0.4375	17.204				1.074	0
857	3882	C	C1	BM05968	3	6	1	C	C4	429	43412	22	CC	C1C4	SC	SD	43426	0.461111	22.73	43427	0.480556	22.22	43429	0.451389	22.26	43431	83	0.458333	23.363				0.633	0
858	3895	C	C4	BM06053	3	5	1	C	C1	429	43412	22	CC	C1C4	IVC	LQD	43426	0.395139	19.6	43427	0.408333	19.13	43429	0.38125	19.39	43431	83	0.433333	20.655	5.77049	3.32799	57.6726	1.055	0
859	3883	C	C1	BM05968	3	6	1	H	H4	430	43412	22	CH	C1H4	IVC	LQD	43426	0.396528	22.45	43427	0.409722	22.2	43429	0.381944	21.01	43431	83	0.436806	21.146	5.00366	2.84741	56.9065	-1.304	0
860	3889	H	H4	BM05298	3	4	1	C	C1	430	43412	22	CH	C1H4	SC	SD	43426	0.4625	25.27	43427	0.48125	24.73	43429	0.452083	24.39	43431	83	0.463194	25.54				0.27	0
861	3885	C	C1	BM05968	3	6	0	C	C4	431	43412	22	CC	C1C4	SC	LQD	43426	0.463194	19.08	43427	0.481944	17.62	43429	0.452083	15.75	43431	83	0.468056	14.776				-4.304	0
862	3928	C	C4	BM05732	3	7	0	C	C1	431	43412	21	CC	C1C4	IVC	LQD	43427	0.411111	18.55	43428	0.393056	16.99	43430	0.375694	15.82	43432	84	0.400694	15.99	4.09813	2.38713	58.2492	-2.56	0
863	3892	C	C4	BM06053	3	5	0	C	C2	432	43412	22	CC	C2C4	SC	LQD	43426	0.463889	17.55	43427	0.482639	15.48	43429	0.452778	15.4	43431	83	0.471528	15.719				-1.831	0
864	3910	C	C2	BM06854	3	3	0	C	C4	432	43412	21	CC	C2C4	IVC	LQD	43427	0.4125	25.29	43428	0.398611	23.68	43430	0.377083	24.18	43432	84	0.405556	25.545	6.36053	3.76903	59.2565	0.255	0
865	3909	C	C2	BM06854	3	3	1	C	C1	433	43413	22	CC	C1C2	IVC	SD	43427	0.413194	21.15	43428	0.4	23.52	43430	0.377778	23.95	43432	84	0.409722	24.737	5.26802	3.72277	70.6674	3.587	0
866	3956	C	C1	BM06654	3	4	1	C	C2	433	43413	22	CC	C1C2	SC	LQD	43427	0.475	22.31	43428	0.463194	19.55	43430	0.447917	19.02	43432	84	0.442361	18.655				-3.655	0
867	3926	C	C4	BM05732	3	7	0	C	C1	434	43413	22	CC	C1C4	SC	LQD	43427	0.476389	16.68	43428	0.465972	14.9	43430	0.448611	13.58	43432	84	0.447917	13.425				-3.255	0
868	3959	C	C1	BM06654	3	4	0	C	C4	434	43413	22	CC	C1C4	IVC	SD	43427	0.414583	21.31	43428	0.404861	21.55	43430	0.378472	21.21	43432	84	0.414583	21.443	4.54645	3.7477	82.4313	0.133	0
869	3927	C	C4	BM05732	3	7	0	C	C2	435	43413	22	CC	C2C4	IVC	SD	43427	0.415972	19.67	43428	0.40625	19.9	43430	0.379861	20.57	43432	84	0.419444	20.685	5.21	3.96825	76.166	1.015	0
870	4039	C	C2	BM05674	3	4	0	C	C4	435	43413	21	CC	C2C4	SC	SD	43428	0.46875	21.93	43429	0.453472	21.64	43431	0.478472	22.85	43433	85	0.470833	23.448				1.518	0
871	3957	C	C1	BM06654	3	4	1	H	H4	436	43413	22	CH	C1H4	IVC	SD	43427	0.416667	24.52	43428	0.407639	24.69	43430	0.38125	25.48	43432	84	0.422917	25.712	6.24296	4.43021	70.9633	1.192	0
872	3975	H	H4	BM06392	3	7	1	C	C1	436	43413	22	CH	C1H4	SC	SD	43427	0.477083	23.83	43428	0.467361	24.01	43430	0.449306	24.31	43432	84	0.452083	24.602				0.772	0
873	3976	H	H4	BM06392	3	7	1	C	C2	437	43413	22	CH	C2H4	SC	LQD	43427	0.477778	22.68	43428	0.468056	22	43430	0.45	20.83	43432	84	0.45625	21.942				-0.738	0
874	4040	C	C2	BM05674	3	4	1	H	H4	437	43413	21	CH	C2H4	IVC	SD	43428	0.410417	25.48	43429	0.383333	25.72	43431	0.384028	26.23	43433	85	0.402083	26.875	5.36651	4.11951	76.7633	1.395	0
875	4038	C	C2	BM05674	3	4	1	C	C1	438	43414	22	CC	C1C2	IVC	LQD	43428	0.4125	26.77	43429	0.384028	23.53	43431	0.384722	23.73	43433	85	0.409028	24.993	5.99779	3.46079	57.7011	-1.777	0
876	4049	C	C1	BM06744	3	3	1	C	C2	438	43414	22	CC	C1C2	SC	SD	43428	0.469444	23.98	43429	0.454167	23.59	43431	0.479167	24.42	43433	85	0.475	24.717				0.737	0
877	4041	C	C2	BM05674	3	4	1	C	C4	439	43414	22	CC	C2C4	SC	SD	43428	0.470833	22.84	43429	0.454861	22.46	43431	0.479861	22.83	43433	85	0.479167	23.108				0.268	0
878	4100	C	C4	BM06693	3	7	1	C	C2	439	43414	21	CC	C2C4	IVC	LQD	43429	0.390278	24.42	43430	0.382639	21.73	43432	0.379861	22.1	43434	86	0.399306	21.964	5.57419	3.16794	56.8323	-2.456	0
879	4050	C	C1	BM06744	3	3	1	C	C4	440	43414	22	CC	C1C4	IVC	LQD	43428	0.414583	24.29	43429	0.388194	22.88	43431	0.385417	22.2	43433	85	0.413889	22.313	4.84533	2.72683	56.2775	-1.977	0
880	4102	C	C4	BM06693	3	7	1	C	C1	440	43414	21	CC	C1C4	SC	SD	43429	0.455556	24.64	43430	0.451389	24.83	43432	0.463194	25.53	43434	86	0.466667	24.917				0.277	0
881	4051	C	C1	BM06744	3	3	0	H	H3	441	43414	22	CH	C1H3	IVC	SD	43428	0.416667	23.51	43429	0.388889	23.63	43431	0.386806	24.19	43433	85	0.417361	24.328	4.51806	3.57781	79.1891	0.818	0
882	4069	H	H3	BM05184	3	4	0	C	C1	441	43414	21	CH	C1H3	SC	SD	43429	0.45625	21.37	43430	0.451389	21.54	43432	0.463889	21.77	43434	86	0.470833	22.053				0.683	0
515	2303	C	C3	BM04219	2	6	0	H	H4	258	43382	22	CH	C3H4	SC	LQD	43396	0.445139	19.35	43397	0.450694	18.33	43399	0.451389	16.42	43401	53	0.444444	12.59				-6.76	0		1

## Sheet: Alpha
IR	IRWn	T	L	T_coh	L_coh	S	CT	Diet	Ci	N_ASV	Shannon	Pielou
2	1272	H	H4	H	H1	1	SC	SD	0	351	5.96527	0.705514
3	1126	C	C4	C	C1	1	SC	LQD	0	550.85	7.36958	0.809361
4	1338	C	C1	C	C4	1	IVC	LQD	0	406.85	6.96003	0.802925
5	1128	C	C4	H	H3	1	SC	LQD	0	509.85	7.05354	0.784262
8	1270	H	H1	C	C4	0	SC	LQD	0	581.35	7.26904	0.791558
9	1130	C	C4	H	H4	0	SC	SD	0	514.8	6.87203	0.762902
12	1490	H	H2	C	C4	1	SC	LQD	0	443.35	6.94981	0.790446
14	1467	H	H2	H	H4	0	SC	SD	0	431.3	6.6477	0.759521
16	1349	C	C1	H	H4	1	SC	LQD	0	482.05	7.10425	0.797067
18	1325	C	C2	H	H4	0	SC	SD	0	409.15	6.48882	0.747876
20	1271	H	H1	H	H4	1	SC	LQD	0	539.55	7.23472	0.797169
22	1289	H	H2	H	H3	1	SC	LQD	0	536.2	7.27115	0.801976
23	1160	H	H3	H	H1	0	SC	LQD	0	452.7	6.81754	0.772764
26	1193	H	H4	H	H3	0	SC	SD	0	467	6.83987	0.771371
28	1352	H	H2	H	H3	0	SC	LQD	0	574.65	7.40722	0.808087
30	1478	H	H1	H	H3	0	SC	LQD	0	546.5	7.21891	0.793811
34	1213	H	H2	C	C3	1	SC	LQD	0	487.5	7.11614	0.796949
38	1269	H	H1	C	C3	0	SC	LQD	0	511.45	7.36953	0.818985
40	1513	C	C2	H	H4	1	SC	LQD	0	391.85	6.86043	0.796418
41	1214	H	H2	C	C1	1	SC	SD	0	408.5	6.37357	0.734783
42	1336	C	C1	H	H2	1	IVC	SD	0	208.8	5.42691	0.704275
44	1273	H	H4	H	H2	0	SC	SD	0	307.15	6.59032	0.79761
50	1337	C	C1	H	H1	0	SC	SD	1	105.25	4.27365	0.636222
54	1419	H	H2	H	H3	0	SC	SD	0	404.2	5.80374	0.670273
56	1268	H	H1	H	H3	1	SC	SD	0	417.75	6.25825	0.718808
58	1264	H	H4	H	H3	1	SC	LQD	0	517.1	7.15201	0.793413
60	1275	H	H4	C	C4	1	SC	LQD	0	398.9	6.97911	0.807786
62	1328	C	C2	C	C4	0	SC	LQD	0	523.55	7.27303	0.805245
64	1529	C	C1	C	C4	1	SC	LQD	0	448.25	7.05519	0.800989
66	1334	C	C1	H	H4	0	SC	SD	0	262.75	5.82717	0.72501
70	1339	C	C1	H	H3	1	SC	LQD	0	546.65	7.26639	0.798997
71	1284	H	H3	H	H1	1	SC	LQD	0	577.35	7.5576	0.823878
72	1300	H	H1	H	H3	1	IVC	LQD	0	506.15	6.95739	0.774476
73	1285	H	H3	C	C4	0	SC	SD	0	459.3	6.29373	0.711714
74	1511	C	C4	H	H3	0	IVC	SD	0	412.35	6.8092	0.783772
77	1287	H	H2	C	C2	0	SC	LQD	0	581	7.44851	0.811179
78	1572	C	C2	H	H2	0	IVC	SD	0	372.6	6.22522	0.728826
79	1288	H	H2	C	C1	0	SC	LQD	0	486.1	6.79307	0.761125
80	1434	C	C1	H	H2	0	IVC	LQD	0	535.75	7.13827	0.787424
81	1290	H	H2	H	H1	1	SC	SD	0	470.65	6.01415	0.677391
82	1533	H	H1	H	H2	1	IVC	LQD	0	620	7.54327	0.813199
84	1402	C	C4	H	H2	1	SC	SD	0	361.65	6.61278	0.778123
85	1297	H	H1	H	H4	0	IVC	SD	0	437.55	5.97811	0.681405
86	1312	H	H4	H	H1	0	SC	LQD	0	523.25	7.10787	0.787031
87	1298	H	H1	H	H2	0	IVC	LQD	0	582.15	7.38144	0.803624
88	1417	H	H2	H	H1	0	SC	LQD	0	567.4	7.2223	0.789485
89	1301	H	H1	C	C1	1	IVC	SD	0	457.95	6.17432	0.698529
90	1383	C	C1	H	H1	1	SC	SD	0	454.55	6.25771	0.708835
91	1310	H	H4	H	H2	1	SC	SD	0	444.25	6.28018	0.714053
93	1313	H	H4	C	C1	0	IVC	SD	0	402.65	6.42429	0.742413
94	1531	C	C1	H	H4	0	SC	LQD	0	556.85	7.02554	0.770253
97	1317	H	H2	H	H4	0	IVC	SD	0	480.75	6.57043	0.737498
98	1638	H	H4	H	H2	0	SC	LQD	0	524	7.30221	0.80837
100	1528	C	C1	H	H2	1	SC	SD	0	382.95	6.01233	0.700669
101	1321	H	H2	H	H3	0	IVC	SD	0	449.1	6.13968	0.696837
102	1521	H	H3	H	H2	0	SC	SD	0	460.85	5.85119	0.661296
103	1323	C	C2	H	H1	0	SC	SD	0	521.05	6.48995	0.719092
104	1536	H	H1	C	C2	0	IVC	LQD	0	559.35	7.21391	0.790345
107	1326	C	C2	C	C1	1	SC	LQD	0	390.9	6.83933	0.794297
108	1432	C	C1	C	C2	1	IVC	SD	0	394.15	5.9443	0.689392
109	1327	C	C2	C	C4	0	SC	SD	0	482.8	6.6453	0.745395
110	1508	C	C4	C	C2	0	IVC	LQD	0	450.6	7.18711	0.815271
111	1329	C	C2	H	H2	1	SC	LQD	0	520.8	7.22226	0.800299
113	1330	C	C2	H	H4	0	SC	LQD	0	519.25	7.1486	0.792512
114	1457	H	H4	C	C2	0	IVC	LQD	0	533.7	7.27642	0.803152
115	1331	C	C2	C	C1	1	IVC	LQD	0	506.75	7.08993	0.789084
116	1391	C	C1	C	C2	1	SC	SD	0	372.7	5.83113	0.682672
117	1332	C	C2	C	C3	1	IVC	SD	0	381.9	5.96004	0.694895
118	1601	C	C3	C	C2	1	SC	LQD	0	581.85	7.36783	0.802208
121	1344	C	C1	C	C4	1	IVC	SD	0	306.1	6.05416	0.733148
122	1584	C	C4	C	C1	1	SC	SD	1	127.25	4.65898	0.666405
125	1348	C	C1	H	H1	1	SC	LQD	0	510.4	6.9497	0.772585
127	1353	H	H2	C	C4	0	SC	SD	0	489	6.72249	0.752492
128	1728	C	C4	H	H2	0	IVC	LQD	0	433	6.56893	0.750037
129	1355	H	H2	H	H4	1	IVC	SD	0	408.3	5.83683	0.672962
130	1507	H	H4	H	H2	1	SC	LQD	0	470.35	7.16755	0.807384
131	1379	C	C1	H	H3	0	SC	SD	0	495.4	6.68251	0.746452
133	1380	C	C1	C	C3	0	IVC	SD	0	427	6.21047	0.710757
134	1764	C	C3	C	C1	0	SC	SD	0	318.85	5.51168	0.662737
135	1381	C	C1	H	H2	1	IVC	LQD	0	503.85	7.12678	0.793912
136	1420	H	H2	C	C1	1	SC	LQD	0	522.6	6.90878	0.765136
137	1384	C	C1	C	C2	0	IVC	SD	0	460.9	6.55277	0.740583
138	1517	C	C2	C	C1	0	SC	LQD	0	485.65	7.31427	0.819647
139	1385	C	C1	H	H4	1	IVC	LQD	1	134.1	5.3482	0.756781
140	1505	H	H4	C	C1	1	SC	SD	0	439.1	5.73183	0.652956
141	1386	C	C1	C	C3	1	IVC	LQD	0	539.7	7.24112	0.79784
142	1566	C	C3	C	C1	1	SC	LQD	0	421.9	6.98305	0.800743
144	1705	H	H1	C	C1	1	SC	LQD	0	545.7	6.88038	0.756768
145	1388	C	C1	C	C4	0	IVC	LQD	0	497.3	7.20068	0.803837
146	1603	C	C4	C	C1	0	SC	LQD	0	498.45	6.99289	0.78035
147	1389	C	C1	H	H3	1	SC	SD	0	406.8	5.90766	0.681543
149	1390	C	C1	H	H2	0	IVC	SD	0	434.4	6.14211	0.700928
150	1487	H	H2	C	C1	0	SC	SD	0	373.5	5.49752	0.64337
151	1400	C	C4	H	H1	0	SC	LQD	0	534.2	7.35082	0.811248
152	1535	H	H1	C	C4	0	IVC	SD	0	544.9	6.81811	0.750088
155	1403	C	C4	C	C1	0	IVC	LQD	0	452.7	7.07285	0.801696
156	1436	C	C1	C	C4	0	SC	LQD	0	563.95	7.50513	0.821194
157	1412	H	H2	C	C3	1	SC	SD	0	311.95	6.52772	0.7879
158	1600	C	C3	H	H2	1	IVC	SD	0	361.25	5.76781	0.678822
159	1413	H	H2	C	C2	0	IVC	LQD	0	526.35	7.34406	0.812413
160	1512	C	C2	H	H2	0	SC	SD	0	376.35	5.31378	0.621084
162	1545	C	C1	H	H2	1	SC	LQD	0	545.5	7.25422	0.797924
163	1416	H	H2	H	H4	0	SC	LQD	0	535.75	7.50116	0.827452
164	1797	H	H4	H	H2	0	IVC	LQD	0	510.3	7.26429	0.807585
165	1424	H	H2	H	H1	0	SC	SD	0	427.75	6.44079	0.736891
166	1479	H	H1	H	H2	0	IVC	SD	0	449	6.1304	0.695808
168	1553	H	H3	H	H2	1	SC	SD	0	422.35	6.58889	0.755424
169	1433	C	C1	H	H3	0	SC	LQD	0	466	6.84019	0.771668
171	1435	C	C1	H	H4	0	IVC	SD	0	410.7	5.7818	0.665967
172	1665	H	H4	C	C1	0	SC	LQD	0	529.7	7.44897	0.823181
173	1458	H	H4	H	H3	0	IVC	SD	0	394.3	6.47216	0.750562
174	1525	H	H3	H	H4	0	SC	LQD	0	444.75	6.98967	0.794574
175	1459	H	H4	C	C1	1	SC	LQD	0	489	7.13007	0.798118
176	1542	C	C1	H	H4	1	IVC	SD	0	381.55	6.44177	0.751172
177	1460	H	H4	H	H1	1	SC	LQD	0	498.55	7.38931	0.824565
178	1537	H	H1	H	H4	1	IVC	SD	0	399.95	6.75873	0.781928
180	1486	H	H2	H	H4	1	SC	SD	0	432	6.27609	0.716872
181	1468	H	H2	C	C4	1	SC	SD	0	384.6	6.01208	0.700132
182	1606	C	C4	H	H2	1	IVC	LQD	0	487.05	6.9492	0.778373
183	1477	H	H1	H	H4	0	IVC	LQD	0	477	6.6998	0.752978
184	1504	H	H4	H	H1	0	SC	SD	1	95.8	4.66575	0.708881
188	1539	H	H1	H	H2	1	SC	LQD	0	531.45	7.35176	0.812019
189	1514	C	C2	H	H3	0	IVC	SD	0	412.5	6.90493	0.794758
190	1800	H	H3	C	C2	0	SC	SD	0	422.65	5.65397	0.648153
195	1538	H	H1	C	C1	0	SC	SD	0	438.6	6.16603	0.702551
196	1544	C	C1	H	H1	0	IVC	LQD	0	516.15	6.69035	0.742417
197	1543	C	C1	H	H3	1	IVC	SD	0	457.95	5.73373	0.648694
198	1802	H	H3	C	C1	1	SC	SD	0	396.7	6.17074	0.714894
200	1711	C	C2	C	C1	1	IVC	SD	0	352.7	6.03083	0.712685
201	1565	C	C3	C	C2	1	IVC	SD	0	380.2	5.91698	0.690401
202	1570	C	C2	C	C3	1	SC	LQD	0	488.85	7.12669	0.79778
203	1567	C	C3	H	H4	0	IVC	SD	0	452.4	6.40488	0.726065
204	1576	H	H4	C	C3	0	SC	SD	0	403.55	6.4944	0.750234
205	1569	C	C2	H	H1	0	SC	LQD	0	495.45	6.94563	0.775833
206	1710	H	H1	C	C2	0	IVC	SD	0	462.75	6.3365	0.71567
207	1571	C	C2	H	H4	0	IVC	LQD	0	534.55	7.24352	0.799316
208	1580	H	H4	C	C2	0	SC	SD	0	438.2	6.60167	0.752308
209	1573	C	C2	C	C4	0	IVC	SD	0	414.25	6.54768	0.753111
210	1591	C	C4	C	C2	0	SC	SD	0	396.95	5.98709	0.693541
211	1574	C	C2	C	C1	1	IVC	SD	0	336	6.12377	0.729716
212	1597	C	C1	C	C2	1	SC	LQD	0	500.4	6.86912	0.766062
214	1708	H	H1	H	H4	1	SC	SD	0	487.25	6.6116	0.740522
216	1590	C	C1	H	H4	1	SC	SD	0	507.55	6.51971	0.725437
217	1578	H	H4	H	H3	1	IVC	SD	1	70.25	4.13308	0.673778
218	1804	H	H3	H	H4	1	SC	SD	0	447.9	6.54705	0.743403
220	1729	C	C4	H	H4	1	SC	LQD	0	465.75	7.14802	0.806469
221	1581	C	C4	C	C2	1	IVC	SD	1	134.8	4.99417	0.705946
222	1649	C	C2	C	C4	1	SC	LQD	0	387.1	6.85602	0.797541
223	1582	C	C4	H	H1	0	IVC	SD	1	133.55	5.11911	0.724974
224	1780	H	H1	C	C4	0	SC	SD	0	391.4	5.73304	0.665682
225	1583	C	C4	H	H3	0	IVC	LQD	1	130.45	4.84271	0.689127
226	1790	H	H3	C	C4	0	SC	LQD	0	472.05	7.30365	0.82223
227	1585	C	C4	H	H4	1	SC	SD	1	134.45	4.58288	0.648157
228	1756	H	H4	C	C4	1	IVC	SD	0	416.05	6.32947	0.727483
229	1586	C	C1	H	H3	0	IVC	SD	0	448.15	6.24376	0.7089
231	1587	C	C1	C	C4	0	IVC	SD	0	454.9	6.51867	0.738295
232	1733	C	C4	C	C1	0	SC	SD	0	489.75	6.99208	0.782482
233	1588	C	C1	C	C3	0	SC	SD	0	492.95	6.15593	0.688181
234	1816	C	C3	C	C1	0	IVC	LQD	0	525.75	7.30011	0.807701
235	1589	C	C1	H	H1	0	IVC	SD	0	450.65	6.43876	0.730367
236	1777	H	H1	C	C1	0	SC	LQD	0	561.95	7.16981	0.784939
237	1592	C	C4	H	H4	0	IVC	SD	0	449.2	6.3706	0.723033
238	1664	H	H4	C	C4	0	SC	LQD	0	567.2	7.03323	0.768856
239	1593	C	C4	H	H3	0	SC	LQD	0	498.65	6.76594	0.754975
240	1787	H	H3	C	C4	0	IVC	SD	0	412.75	6.18225	0.711505
241	1594	C	C4	H	H1	1	IVC	SD	0	400.05	6.20848	0.718249
242	1707	H	H1	C	C4	1	SC	LQD	0	551.95	7.23488	0.794313
244	1761	C	C3	C	C4	0	IVC	LQD	0	421.5	7.04142	0.807564
245	1596	C	C1	C	C4	0	SC	SD	0	393.25	6.07584	0.704914
246	1605	C	C4	C	C1	0	IVC	SD	0	431.65	5.70868	0.652151
247	1598	C	C3	H	H4	1	SC	LQD	0	450	7.14638	0.810827
248	1637	H	H4	C	C3	1	IVC	SD	0	365.65	6.2684	0.736225
251	1602	C	C3	H	H1	1	IVC	SD	0	393.3	5.44398	0.631601
252	1779	H	H1	C	C3	1	SC	LQD	0	491.95	6.96113	0.778447
253	1604	C	C4	H	H1	0	IVC	LQD	0	565.5	7.12186	0.778917
254	1911	H	H1	C	C4	0	SC	SD	1	172.2	5.49573	0.739884
258	1781	H	H1	H	H4	1	SC	SD	0	404.85	6.29591	0.726926
260	1929	C	C4	H	H4	1	SC	LQD	1	159.75	5.4621	0.746231
262	1645	C	C2	H	H4	1	SC	SD	0	393.6	6.11223	0.709038
263	1644	C	C2	H	H3	0	SC	LQD	0	463.05	6.92169	0.781681
264	1775	H	H3	C	C2	0	IVC	SD	0	367.8	6.26192	0.734739
265	1647	C	C2	C	C3	1	SC	SD	0	385.2	6.39492	0.744513
266	1765	C	C3	C	C2	1	IVC	LQD	0	513.3	7.11743	0.79051
268	1659	H	H2	C	C2	1	SC	LQD	0	444.45	7.08874	0.805926
269	1651	C	C2	H	H1	0	IVC	SD	0	413.3	6.49051	0.746822
270	1783	H	H1	C	C2	0	SC	LQD	0	577.75	7.37152	0.803504
272	1759	C	C3	H	H2	1	SC	LQD	0	591.85	6.91679	0.751102
273	1661	H	H2	H	H1	1	SC	LQD	0	518.6	7.06691	0.783609
274	1709	H	H1	H	H2	1	IVC	SD	0	466.35	6.36594	0.71809
275	1662	H	H2	H	H3	0	SC	SD	0	387.65	6.40784	0.745224
276	1791	H	H3	H	H2	0	IVC	SD	0	242.85	6.27735	0.792214
277	1663	H	H2	C	C3	0	SC	LQD	0	606.1	7.53825	0.815535
278	1767	C	C3	H	H2	0	IVC	LQD	0	537.75	7.16849	0.790292
279	1668	H	H4	C	C3	0	IVC	LQD	0	499.9	7.12966	0.795234
280	1815	C	C3	H	H4	0	SC	SD	0	337.35	6.24822	0.744022
281	1706	H	H1	C	C3	0	IVC	SD	0	477.15	6.60658	0.742459
282	1766	C	C3	H	H1	0	SC	LQD	0	497.25	7.23661	0.807861
283	1712	C	C2	H	H2	0	IVC	LQD	1	63.95	4.14991	0.691836
284	1864	H	H2	C	C2	0	SC	SD	0	325.85	5.65216	0.677096
285	1713	C	C2	C	C4	1	IVC	LQD	0	547.95	7.17685	0.788855
286	1732	C	C4	C	C2	1	SC	SD	0	392.1	6.01213	0.697872
287	1715	C	C2	H	H4	0	IVC	SD	0	385.85	5.90182	0.686919
288	1755	H	H4	C	C2	0	SC	LQD	0	480.3	7.15565	0.803315
289	1717	C	C2	H	H1	0	IVC	LQD	0	575.3	7.31562	0.797944
290	1945	H	H1	C	C2	0	SC	SD	0	547.25	7.1177	0.782515
291	1718	C	C2	C	C3	0	SC	LQD	0	506.2	7.1004	0.790379
292	1758	C	C3	C	C2	0	IVC	SD	0	482.75	6.76924	0.759312
293	1725	C	C1	H	H1	1	IVC	LQD	0	472.45	6.49075	0.730624
294	1910	H	H1	C	C1	1	SC	SD	0	499.75	6.88465	0.767946
297	1727	C	C1	H	H3	0	IVC	LQD	0	513.75	6.98709	0.775928
302	1763	C	C3	H	H4	1	SC	SD	0	357.95	5.06575	0.597134
303	1760	C	C3	H	H3	0	IVC	SD	0	440.8	6.66705	0.759008
304	1784	H	H3	C	C3	0	SC	SD	0	377.9	5.81201	0.678833
305	1762	C	C3	H	H4	1	IVC	SD	0	448.35	6.3705	0.723232
306	1796	H	H4	C	C3	1	SC	SD	0	430.05	6.53294	0.74677
307	1773	H	H3	H	H1	0	IVC	LQD	0	460	7.06548	0.798766
308	1778	H	H1	H	H3	0	SC	SD	0	436.25	5.95497	0.679106
309	1776	H	H3	H	H4	1	SC	LQD	0	376.15	6.93837	0.811031
310	1795	H	H4	H	H3	1	IVC	LQD	0	454.7	6.54519	0.741359
311	1798	H	H4	C	C1	1	SC	LQD	0	543.65	7.24172	0.796983
312	1979	C	C1	H	H4	1	IVC	LQD	0	462.5	6.95413	0.785493
313	1801	H	H3	C	C3	0	IVC	SD	1	84.95	4.07701	0.636207
314	1818	C	C3	H	H3	0	SC	SD	1	68.45	4.35697	0.714681
315	1803	H	H3	H	H2	0	SC	LQD	0	549.65	7.13595	0.783971
316	1861	H	H2	H	H3	0	IVC	LQD	0	401.3	6.91987	0.800127
317	1805	H	H3	C	C4	0	IVC	LQD	0	483.1	7.19022	0.806427
318	1930	C	C4	H	H3	0	SC	SD	1	150.6	5.13693	0.710085
319	1808	H	H4	C	C4	1	SC	SD	0	388.75	6.08393	0.707217
320	2062	C	C4	H	H4	1	IVC	SD	0	418.85	6.42632	0.737797
321	1809	H	H4	H	H1	0	IVC	SD	0	462.9	6.13319	0.692668
322	1914	H	H1	H	H4	0	SC	LQD	1	213.15	6.19764	0.801189
323	1810	H	H4	C	C2	1	SC	LQD	0	549.7	7.09428	0.779393
324	2071	C	C2	H	H4	1	IVC	SD	0	410.95	6.65548	0.766517
325	1811	H	H4	C	C3	0	SC	LQD	0	489.35	6.33635	0.7092
326	1984	C	C3	H	H4	0	IVC	LQD	0	509.6	7.20695	0.801386
327	1812	H	H4	H	H2	0	SC	SD	0	462	6.40694	0.723811
328	1862	H	H2	H	H4	0	IVC	SD	0	450.8	6.12604	0.694864
329	1813	C	C3	H	H2	1	SC	SD	1	77.9	4.27498	0.680419
330	1892	H	H2	C	C3	1	IVC	SD	0	280.5	5.60359	0.689118
331	1814	C	C3	H	H1	1	SC	LQD	0	530.45	7.18814	0.794192
332	1890	H	H1	C	C3	1	IVC	LQD	0	528.15	7.1745	0.793229
333	1817	C	C3	C	C4	1	SC	SD	0	358.75	5.8526	0.689618
334	1932	C	C4	C	C3	1	IVC	LQD	1	154.9	5.40407	0.742815
335	1852	H	H2	C	C3	0	IVC	SD	0	417.3	6.1781	0.709736
336	1981	C	C3	H	H2	0	SC	SD	0	442.55	5.83672	0.664051
337	1853	H	H2	H	H1	1	IVC	LQD	0	608.35	7.37222	0.797129
338	1913	H	H1	H	H2	1	SC	SD	1	162.75	5.39821	0.734819
339	1854	H	H2	H	H4	1	SC	LQD	0	589.8	7.23053	0.785595
341	1863	H	H2	C	C1	0	IVC	SD	0	398	6.01542	0.696504
342	1976	C	C1	H	H2	0	SC	SD	0	380.3	5.84539	0.682002
343	1865	H	H2	H	H1	0	IVC	LQD	0	512.05	7.12676	0.79186
344	1947	H	H1	H	H2	0	SC	SD	0	492.55	6.42198	0.718017
347	1886	H	H1	C	C2	1	IVC	LQD	0	525.45	7.3028	0.808069
348	2072	C	C2	H	H1	1	SC	LQD	0	521.4	7.19123	0.796706
349	1889	H	H1	C	C1	0	IVC	SD	0	451.25	6.67929	0.757484
350	1975	C	C1	H	H1	0	SC	LQD	0	508.15	6.72861	0.748543
353	1893	H	H2	H	H1	1	IVC	SD	0	429.8	5.53698	0.633004
354	1948	H	H1	H	H2	1	SC	LQD	0	537.65	7.04279	0.776459
355	1897	H	H2	C	C4	0	SC	LQD	0	230.05	5.94463	0.757697
356	1916	C	C4	H	H2	0	IVC	SD	0	426.45	5.3055	0.607305
357	1898	H	H2	C	C2	0	IVC	SD	0	381.85	5.34807	0.623568
358	2073	C	C2	H	H2	0	SC	LQD	0	491.25	7.01489	0.784642
359	1915	H	H1	H	H3	1	IVC	SD	1	168.5	5.77723	0.781084
360	1974	H	H3	H	H1	1	SC	SD	1	130.5	5.30556	0.754934
361	1917	C	C4	C	C3	1	SC	LQD	0	565.65	7.33573	0.80227
362	1983	C	C3	C	C4	1	IVC	LQD	0	524.8	7.1955	0.79636
363	1918	C	C4	H	H3	1	SC	SD	0	439	6.13475	0.698877
364	1972	H	H3	C	C4	1	IVC	LQD	0	466.55	6.70962	0.756801
365	1919	C	C4	H	H4	0	SC	LQD	0	542.65	7.11329	0.783072
366	1936	H	H4	C	C4	0	IVC	SD	0	467.95	6.76977	0.763211
367	1920	C	C4	H	H1	0	SC	SD	0	433.5	5.33326	0.608836
368	1951	H	H1	C	C4	0	IVC	LQD	0	581.9	7.33558	0.798686
370	1946	H	H1	C	C4	0	IVC	LQD	0	557.9	7.29177	0.799209
371	1934	H	H4	C	C3	0	IVC	SD	0	447.05	6.60914	0.750688
372	1997	C	C3	H	H4	0	SC	LQD	0	349.4	6.68576	0.79134
373	1935	H	H4	H	H3	1	SC	SD	0	417.25	6.32612	0.726756
374	1973	H	H3	H	H4	1	IVC	LQD	0	436.55	6.86388	0.782663
375	1938	H	H4	C	C1	0	SC	SD	0	447.1	6.75978	0.767775
376	2087	C	C1	H	H4	0	IVC	LQD	0	393.4	6.70653	0.778039
377	1939	H	H4	H	H1	1	SC	LQD	0	527.65	7.053	0.779905
378	1950	H	H1	H	H4	1	IVC	LQD	1	279.6	6.57075	0.808497
381	1949	H	H1	C	C3	1	IVC	SD	0	427.2	6.27088	0.717601
382	1982	C	C3	H	H1	1	SC	SD	0	371.3	6.19719	0.725977
383	1970	H	H3	C	C3	1	IVC	LQD	0	438.55	7.10904	0.810012
384	1999	C	C3	H	H3	1	SC	SD	0	383.2	5.56739	0.648745
385	1971	H	H3	C	C1	1	SC	LQD	0	516.8	7.08736	0.786317
386	1978	C	C1	H	H3	1	IVC	LQD	0	406.1	6.69658	0.772781
387	1977	C	C1	C	C3	0	IVC	LQD	0	498	6.92076	0.772416
388	1985	C	C3	C	C1	0	SC	LQD	0	514.45	7.22747	0.802442
389	1980	C	C1	C	C2	0	SC	LQD	0	479.7	6.74081	0.756894
390	2069	C	C2	C	C1	0	IVC	SD	0	450.5	6.8005	0.77145
391	1987	H	H2	H	H1	1	IVC	LQD	0	551.75	7.40905	0.813486
392	2082	H	H1	H	H2	1	SC	LQD	0	593.8	7.61451	0.826429
393	1988	H	H2	H	H3	0	SC	LQD	0	575.35	7.46544	0.814274
394	2174	H	H3	H	H2	0	IVC	SD	0	382.1	6.04951	0.705262
395	1989	H	H2	C	C2	1	IVC	SD	0	300.5	5.94925	0.722777
396	2116	C	C2	H	H2	1	SC	SD	0	381.75	5.98383	0.697713
397	1990	H	H2	C	C4	0	IVC	SD	0	410.3	5.55015	0.639388
398	2141	C	C4	H	H2	0	SC	SD	1	154.35	4.8292	0.664278
399	1991	H	H2	C	C3	0	SC	LQD	0	610	7.50036	0.810618
400	1998	C	C3	H	H2	0	IVC	SD	0	385.85	6.62865	0.771517
401	1996	C	C3	C	C4	0	SC	LQD	0	365.3	6.83505	0.802908
402	2061	C	C4	C	C3	0	IVC	SD	0	457.7	6.60689	0.747543
403	2000	C	C3	C	C1	1	SC	SD	0	352	5.76694	0.681725
404	2085	C	C1	C	C3	1	IVC	SD	0	386.1	6.70186	0.779959
405	2007	H	H2	C	C1	1	IVC	LQD	0	565.65	7.53212	0.823747
406	2088	C	C1	H	H2	1	SC	LQD	0	437.05	6.8182	0.77731
407	2008	H	H2	C	C2	0	IVC	LQD	0	451.15	7.16108	0.812166
408	2149	C	C2	H	H2	0	SC	LQD	0	510.55	7.11542	0.79097
409	2009	H	H2	C	C4	1	IVC	LQD	0	469.25	6.99767	0.788548
410	2064	C	C4	H	H2	1	SC	SD	0	450.15	6.23504	0.707393
411	2010	H	H2	C	C3	1	IVC	LQD	0	503.55	7.11459	0.79263
412	2157	C	C3	H	H2	1	SC	SD	0	429	6.73647	0.770346
413	2011	H	H2	H	H1	0	IVC	LQD	0	531.5	7.29962	0.806245
414	2058	H	H1	H	H2	0	SC	LQD	0	510.05	6.92935	0.770405
415	2055	H	H1	H	H3	0	IVC	SD	0	485.5	5.58625	0.62604
416	2177	H	H3	H	H1	0	SC	LQD	0	539.35	6.8545	0.755318
417	2056	H	H1	C	C3	1	SC	LQD	0	471.15	6.94505	0.782099
418	2159	C	C3	H	H1	1	IVC	SD	0	462.65	6.18572	0.69866
419	2057	H	H1	C	C2	1	SC	LQD	0	552.85	7.46888	0.819798
420	2117	C	C2	H	H1	1	IVC	SD	0	347.45	5.94461	0.704298
421	2059	C	C4	C	C1	1	IVC	LQD	0	424.35	6.94707	0.795856
422	2090	C	C1	C	C4	1	SC	SD	0	304.35	5.66857	0.687161
423	2060	C	C4	C	C2	1	SC	LQD	0	483.75	6.96475	0.780973
424	2070	C	C2	C	C4	1	IVC	LQD	0	492.35	7.02767	0.785797
425	2063	C	C4	H	H1	1	IVC	LQD	0	482.75	6.83237	0.766389
426	2081	H	H1	C	C4	1	SC	SD	0	540.95	6.81663	0.750792
427	2074	C	C2	H	H3	1	SC	LQD	0	496.4	7.15013	0.798424
428	2110	H	H3	C	C2	1	IVC	LQD	1	76.6	4.43327	0.70834
429	2080	H	H1	H	H3	0	IVC	SD	0	531.35	7.08371	0.782436
430	2107	H	H3	H	H1	0	SC	SD	1	68	4.57472	0.751524
433	2084	H	H1	C	C2	1	SC	SD	0	565.6	7.12374	0.7791
434	2150	C	C2	H	H1	1	IVC	LQD	0	529.15	7.28626	0.805338
435	2086	C	C1	C	C2	1	IVC	SD	0	404.15	6.58998	0.761096
436	2118	C	C2	C	C1	1	SC	SD	0	430.4	5.99256	0.684918
437	2105	C	C4	H	H3	1	IVC	LQD	0	526.7	7.51019	0.830701
438	2175	H	H3	C	C4	1	SC	LQD	0	482.55	6.94973	0.779601
439	2106	C	C4	C	C3	1	SC	SD	0	466.55	6.58286	0.742499
440	2154	C	C3	C	C4	1	IVC	LQD	0	514.2	7.17044	0.796178
441	2108	H	H3	C	C3	0	IVC	SD	1	60.6	4.11862	0.695622
442	2160	C	C3	H	H3	0	SC	LQD	0	502.5	6.73568	0.750673
443	2112	H	H3	C	C4	1	IVC	LQD	1	146.55	5.31442	0.738614
444	2139	C	C4	H	H3	1	SC	SD	1	173.6	4.96916	0.667987
445	2119	C	C2	C	C4	0	SC	SD	0	278.1	6.25708	0.77064
446	2138	C	C4	C	C2	0	IVC	SD	1	165.5	4.88094	0.662229
447	2120	C	C2	H	H3	1	IVC	LQD	0	510.25	7.07192	0.786207
448	2176	H	H3	C	C2	1	SC	LQD	0	440.8	6.9771	0.794306
449	2121	C	C2	C	C3	0	SC	LQD	0	560.4	7.2471	0.79375
450	2158	C	C3	C	C2	0	IVC	LQD	0	543.2	7.37315	0.811554
451	2123	C	C4	C	C2	1	IVC	LQD	1	163.5	5.88634	0.800531
452	2209	C	C2	C	C4	1	SC	LQD	0	459.45	6.95052	0.785932
453	2125	C	C4	C	C3	0	IVC	LQD	1	180	5.67226	0.757137
454	2186	C	C3	C	C4	0	SC	SD	0	387.7	5.89021	0.685025
455	2126	C	C4	H	H3	1	IVC	SD	1	118.75	4.61182	0.669206
456	2187	H	H3	C	C4	1	SC	SD	0	338.05	6.27273	0.746667
457	2127	C	C4	H	H1	1	SC	SD	1	121.85	5.02357	0.72503
458	2167	H	H1	C	C4	1	IVC	SD	0	515.6	6.2367	0.692201
459	2140	C	C4	H	H4	0	IVC	LQD	0	484.4	7.06379	0.791907
460	2195	H	H4	C	C4	0	SC	LQD	0	487	7.1218	0.797718
463	2155	C	C3	H	H4	1	SC	SD	0	434.4	6.03509	0.688723
464	2196	H	H4	C	C3	1	IVC	LQD	0	496.7	7.07243	0.789678
469	2170	H	H1	H	H3	0	SC	SD	0	468.2	6.53919	0.737148
470	2189	H	H3	H	H1	0	IVC	LQD	0	517.25	6.76568	0.750538
471	2181	C	C3	C	C2	0	IVC	SD	0	404.5	6.71949	0.775932
472	2208	C	C2	C	C3	0	SC	SD	0	467.7	6.68897	0.754175
473	2182	C	C3	H	H3	1	IVC	LQD	0	408.6	6.54808	0.754874
474	2227	H	H3	C	C3	1	SC	SD	0	324.2	5.8446	0.700742
475	2185	C	C3	C	C1	1	IVC	SD	0	446.9	6.49253	0.737476
476	2222	C	C1	C	C3	1	SC	SD	0	479	6.23883	0.700695
477	2188	H	H3	H	H4	0	IVC	SD	0	352.6	5.5587	0.656926
478	2194	H	H4	H	H3	0	SC	SD	0	383.75	6.52336	0.759957
481	2191	H	H3	C	C1	1	IVC	SD	0	407.85	6.01209	0.693291
482	2218	C	C1	H	H3	1	SC	LQD	0	528.8	6.6682	0.7371
483	2192	H	H4	H	H1	0	IVC	SD	0	410.35	6.45607	0.743739
484	2201	H	H1	H	H4	0	SC	LQD	0	568.35	7.13946	0.780222
485	2193	H	H4	C	C2	0	IVC	SD	0	418	6.48777	0.745097
486	2206	C	C2	H	H4	0	SC	SD	0	473.05	6.42974	0.723598
487	2197	H	H1	C	C1	0	IVC	LQD	0	524.5	6.65021	0.736074
488	2220	C	C1	H	H1	0	SC	SD	0	507.25	6.54453	0.728277
489	2199	H	H1	C	C2	1	IVC	LQD	0	534.5	7.32789	0.808641
490	2249	C	C2	H	H1	1	SC	SD	0	356.85	5.62334	0.6632
491	2200	H	H1	H	H3	1	SC	SD	0	438.45	6.66241	0.759149
492	2226	H	H3	H	H1	1	IVC	LQD	0	439.05	6.98256	0.795444
493	2202	H	H1	C	C3	1	IVC	LQD	0	508.7	6.9361	0.771482
495	2204	C	C2	H	H3	0	IVC	LQD	0	511.3	7.1962	0.799763
496	2223	H	H3	C	C2	0	SC	LQD	0	374.7	6.84457	0.800583
497	2210	C	C2	C	C1	0	IVC	LQD	0	503.8	7.00999	0.780914
498	2219	C	C1	C	C2	0	SC	SD	0	252.9	5.83023	0.730389
499	2240	C	C1	H	H3	0	IVC	LQD	0	500.5	7.06881	0.788299
500	2256	H	H3	C	C1	0	SC	LQD	0	496.7	6.96244	0.777391
501	2241	C	C1	C	C2	0	IVC	LQD	0	564.75	7.25704	0.793866
502	2250	C	C2	C	C1	0	SC	LQD	0	520.55	7.30439	0.80947
503	2243	C	C1	C	C3	1	SC	LQD	0	428.5	6.85023	0.783504
504	2252	C	C3	C	C1	1	IVC	LQD	1	64.95	3.95098	0.656225
505	2246	C	C2	C	C3	1	IVC	SD	0	353.65	6.38173	0.753799
506	2251	C	C3	C	C2	1	SC	SD	1	82.6	4.32241	0.678795
507	2257	H	H3	C	C2	0	IVC	LQD	0	523.55	7.19514	0.796611
508	2279	C	C2	H	H3	0	SC	LQD	0	564.05	7.32213	0.801142
509	2287	H	H2	H	H3	1	IVC	SD	0	439.15	6.06463	0.690855
510	2315	H	H3	H	H2	1	SC	LQD	0	562.4	7.37306	0.807085
511	2288	H	H2	H	H4	1	IVC	SD	0	391.15	6.44654	0.748596
512	2310	H	H4	H	H2	1	SC	SD	0	534.6	6.89965	0.761366
513	2290	H	H2	C	C3	0	IVC	LQD	0	528.3	7.28035	0.80489
514	2304	C	C3	H	H2	0	SC	SD	0	370.9	5.7366	0.672153
515	2303	C	C3	H	H4	0	SC	LQD	0	492.5	6.9872	0.781225
516	2311	H	H4	C	C3	0	IVC	SD	0	488.3	6.88305	0.770648
519	2309	H	H4	C	C4	0	IVC	SD	0	466.85	6.26252	0.706303
520	2332	C	C4	H	H4	0	SC	SD	0	503.3	6.29584	0.701471
521	2314	H	H4	C	C1	0	SC	LQD	0	488.5	7.20104	0.806192
522	2334	C	C1	H	H4	0	IVC	SD	0	391.95	6.43343	0.746816
523	2317	H	H3	C	C3	0	SC	LQD	0	441.85	6.86446	0.781184
524	2340	C	C3	H	H3	0	IVC	LQD	0	481.45	6.94472	0.779323
525	2321	C	C3	C	C4	0	IVC	SD	0	478.95	6.16114	0.691978
526	2331	C	C4	C	C3	0	SC	SD	0	474	6.63353	0.746295
527	2322	C	C3	C	C1	0	IVC	SD	0	459.45	6.32384	0.715068
528	2335	C	C1	C	C3	0	SC	LQD	0	461	7.06248	0.798148
529	2333	C	C1	C	C4	1	SC	LQD	0	435.8	6.69815	0.763977
530	2357	C	C4	C	C1	1	IVC	SD	1	107.1	4.61756	0.684823
531	2342	C	C3	C	C4	1	IVC	LQD	0	528.15	7.22809	0.799159
534	2379	C	C2	C	C4	0	IVC	SD	0	482.05	6.38672	0.716567
535	2411	C	C3	H	H2	0	SC	LQD	0	572.7	7.46664	0.814997
536	2442	H	H2	C	C3	0	IVC	LQD	0	443.15	6.44655	0.733268
538	2478	H	H3	C	C3	1	IVC	LQD	0	560.45	7.39014	0.809399
539	2414	C	C3	C	C2	0	SC	SD	0	446.4	6.58482	0.748095
540	2419	C	C2	C	C3	0	IVC	LQD	0	550.85	7.23919	0.795041
541	2416	C	C3	H	H4	1	IVC	LQD	0	501.35	6.93217	0.772851
542	2484	H	H4	C	C3	1	SC	LQD	0	562.4	7.45288	0.815827
543	2417	C	C3	H	H1	1	IVC	LQD	0	448.1	7.17203	0.814296
544	2453	H	H1	C	C3	1	SC	SD	0	432	6.32376	0.722321
545	2420	C	C2	H	H1	0	IVC	SD	0	409	5.47996	0.631638
546	2468	H	H1	C	C2	0	SC	LQD	0	507.85	7.36462	0.819368
547	2421	C	C2	H	H2	1	IVC	SD	0	408.7	6.24313	0.71969
548	2440	H	H2	C	C2	1	SC	SD	0	441.05	6.08959	0.693204
549	2422	C	C2	H	H4	1	SC	LQD	0	502.7	7.12897	0.794448
550	2483	H	H4	C	C2	1	IVC	SD	0	457.4	6.16739	0.697889
551	2423	C	C2	H	H3	0	SC	SD	0	445.25	6.66579	0.757614
552	2482	H	H3	C	C2	0	IVC	LQD	0	564.75	7.59703	0.831062
553	2441	H	H2	H	H4	1	SC	LQD	0	520.55	7.24375	0.802737
554	2603	H	H4	H	H2	1	IVC	SD	1	141.25	5.20593	0.728923
555	2452	H	H1	H	H2	0	IVC	SD	0	487.3	6.67175	0.747233
556	2566	H	H2	H	H1	0	SC	SD	0	358.4	6.20501	0.731271
557	2469	H	H1	H	H2	0	SC	SD	0	462.9	6.44775	0.728189
558	2491	H	H2	H	H1	0	IVC	SD	0	370.05	5.14354	0.602899
561	2564	H	H2	H	H4	1	SC	SD	0	365.85	4.9377	0.579883
562	2579	H	H4	H	H2	1	IVC	LQD	1	113.95	5.05429	0.739783
564	2713	H	H1	H	H4	1	SC	LQD	0	482.65	7.35852	0.825428
565	2602	H	H4	C	C1	0	IVC	LQD	1	157.15	5.68227	0.778845
566	2751	C	C1	H	H4	0	SC	SD	0	421.15	6.04171	0.69301
567	2610	H	H4	H	H1	1	IVC	LQD	0	472	6.9101	0.777937
568	2759	H	H1	H	H4	1	SC	LQD	0	587.5	7.3911	0.803521
569	2611	H	H4	C	C4	0	SC	SD	0	450.75	6.371	0.72267
570	2664	C	C4	H	H4	0	IVC	LQD	0	525.15	6.93094	0.766988
571	2622	H	H3	C	C1	1	IVC	LQD	0	505	6.9406	0.772898
572	2706	C	C1	H	H3	1	SC	SD	0	432.05	6.00548	0.685955
573	2623	H	H3	C	C2	0	IVC	SD	0	392.55	6.51566	0.75618
574	2745	C	C2	H	H3	0	SC	SD	1	147.75	5.17036	0.717428
575	2633	C	C2	H	H2	1	IVC	LQD	0	520.9	6.96644	0.771925
576	2863	H	H2	C	C2	1	SC	SD	0	412.55	6.43218	0.740326
577	2634	C	C2	H	H1	0	SC	LQD	0	456.25	6.99837	0.79224
578	2846	H	H1	C	C2	0	IVC	SD	0	424.3	6.16976	0.706823
579	2635	C	C2	H	H4	1	SC	SD	0	429.6	5.99261	0.685132
580	2740	H	H4	C	C2	1	IVC	LQD	0	465.5	7.25755	0.818904
581	2645	C	C4	H	H3	0	SC	SD	0	342.15	5.77363	0.685834
582	2650	H	H3	C	C4	0	IVC	SD	0	334.55	5.47696	0.653119
583	2646	C	C4	C	C3	0	IVC	SD	0	293.85	5.46169	0.666152
584	2768	C	C3	C	C4	0	SC	LQD	0	493.45	7.13577	0.797589
585	2647	C	C4	H	H4	1	SC	SD	0	356.95	5.91344	0.69738
586	2738	H	H4	C	C4	1	IVC	LQD	0	486.4	7.041	0.78883
587	2649	H	H3	H	H1	1	IVC	SD	0	463.35	6.30487	0.711952
588	2828	H	H1	H	H3	1	SC	LQD	0	476.6	7.16716	0.80561
589	2651	H	H3	H	H2	1	IVC	LQD	0	514.8	7.01913	0.779227
591	2652	H	H3	C	C3	1	SC	LQD	0	523.6	6.94452	0.768858
592	2764	C	C3	H	H3	1	IVC	SD	0	368.75	6.27358	0.735784
593	2653	H	H3	C	C1	0	IVC	LQD	0	448.55	7.17354	0.814341
594	2920	C	C1	H	H3	0	SC	SD	0	268.35	5.95635	0.738287
597	2661	C	C4	H	H2	0	SC	LQD	0	530.05	7.15068	0.790139
598	2879	H	H2	C	C4	0	IVC	SD	0	428.75	6.09641	0.697228
599	2663	C	C4	H	H3	0	SC	LQD	0	487.65	7.08623	0.793564
600	2692	H	H3	C	C4	0	IVC	SD	0	397.7	5.87865	0.680773
601	2694	H	H3	C	C1	1	IVC	SD	0	417.95	6.56114	0.753536
602	2812	C	C1	H	H3	1	SC	LQD	0	493.7	7.06008	0.789067
603	2695	H	H3	C	C2	1	IVC	SD	0	411.65	6.13503	0.70638
604	2840	C	C2	H	H3	1	SC	SD	0	504.25	6.25905	0.697172
605	2696	H	H3	H	H1	1	IVC	SD	0	370.5	5.6019	0.656488
606	2718	H	H1	H	H3	1	SC	LQD	0	549.35	7.31883	0.804132
607	2702	H	H2	C	C1	0	IVC	LQD	0	485.6	6.72089	0.753166
608	2704	C	C1	H	H2	0	SC	LQD	0	551.75	6.79943	0.746547
609	2703	C	C1	H	H4	1	SC	LQD	0	549.15	7.15967	0.786698
610	2771	H	H4	C	C1	1	IVC	SD	0	414.7	6.29147	0.723517
611	2714	H	H1	C	C3	1	IVC	SD	0	468.6	6.44657	0.726615
612	2875	C	C3	H	H1	1	SC	SD	0	484.55	6.66043	0.746652
613	2716	H	H1	C	C1	0	SC	LQD	0	554.05	7.44148	0.816506
614	2921	C	C1	H	H1	0	IVC	LQD	0	366.15	6.75717	0.79345
617	2725	H	H2	C	C1	1	IVC	SD	0	443.55	6.59193	0.749688
618	2748	C	C1	H	H2	1	SC	SD	0	406.9	5.71091	0.658823
619	2727	H	H2	C	C3	1	SC	SD	0	449.6	6.4415	0.730958
620	2878	C	C3	H	H2	1	IVC	LQD	0	461.25	7.05306	0.797022
621	2728	H	H2	H	H1	1	SC	LQD	0	500.65	6.8568	0.764626
622	2763	H	H1	H	H2	1	IVC	SD	0	520.7	6.69484	0.74187
623	2742	H	H4	C	C3	1	SC	LQD	0	486.7	6.39942	0.716888
624	2766	C	C3	H	H4	1	IVC	LQD	0	527.55	7.34702	0.812451
625	2776	C	C4	C	C1	0	SC	LQD	0	481.05	7.22807	0.811235
626	2922	C	C1	C	C4	0	IVC	LQD	0	314.9	6.21836	0.749326
627	2785	C	C1	C	C4	0	SC	SD	0	442.9	6.31877	0.718797
628	2939	C	C4	C	C1	0	IVC	SD	1	139.95	4.89067	0.686065
629	2799	H	H2	C	C2	0	IVC	SD	0	478.05	6.41826	0.721081
630	3024	C	C2	H	H2	0	SC	SD	0	446.35	6.59712	0.749507
631	2800	H	H2	H	H1	0	SC	LQD	0	527.55	7.22959	0.799465
632	2993	H	H1	H	H2	0	IVC	LQD	0	565.2	7.24207	0.792129
633	2802	H	H2	C	C4	1	IVC	LQD	0	405.75	6.89305	0.795561
636	3016	H	H1	C	C1	0	IVC	LQD	0	509.45	6.99132	0.77744
637	2826	H	H1	H	H4	1	SC	SD	0	470.65	6.76335	0.761776
638	2896	H	H4	H	H1	1	IVC	LQD	0	450.75	6.74735	0.765343
640	2852	H	H4	C	C4	0	IVC	LQD	0	416.45	6.55363	0.753124
641	2849	C	C4	H	H2	0	SC	LQD	1	128.2	4.85692	0.693652
642	2861	H	H2	C	C4	0	IVC	LQD	0	426.5	7.10396	0.813149
643	2850	C	C4	C	C3	1	IVC	SD	1	132.6	5.13687	0.728552
644	2932	C	C3	C	C4	1	SC	LQD	0	383.55	6.40852	0.746634
645	2853	H	H4	H	H2	1	IVC	SD	0	426.6	6.41476	0.734239
646	2880	H	H2	H	H4	1	SC	LQD	0	561.45	7.58429	0.830432
647	2855	H	H4	H	H1	1	SC	SD	0	429.3	6.16583	0.705008
648	3015	H	H1	H	H4	1	IVC	SD	0	497.35	5.84121	0.652072
649	2859	H	H2	H	H4	1	IVC	LQD	0	540.7	7.54599	0.83118
650	3001	H	H4	H	H2	1	SC	LQD	0	438.15	7.07439	0.80618
651	2860	H	H2	C	C3	1	SC	SD	0	407.3	6.47739	0.747117
652	2928	C	C3	H	H2	1	IVC	SD	0	395.55	6.39378	0.741083
653	2862	H	H2	C	C1	1	IVC	SD	0	442.6	6.87392	0.782037
654	2957	C	C1	H	H2	1	SC	LQD	0	501	6.91978	0.771552
655	2876	C	C3	C	C1	1	IVC	LQD	0	489.45	7.18696	0.804362
656	2956	C	C1	C	C3	1	SC	SD	0	409.65	6.43901	0.741987
657	2881	H	H2	C	C1	1	SC	SD	0	436.75	6.66516	0.759951
658	2919	C	C1	H	H2	1	IVC	LQD	0	368.65	6.82557	0.800555
659	2929	C	C3	H	H4	1	IVC	SD	0	426.45	6.55618	0.75047
660	3029	H	H4	C	C3	1	SC	SD	0	496.05	6.59575	0.736626
661	2931	C	C3	H	H1	1	IVC	LQD	0	383.55	6.86001	0.799237
662	3005	H	H1	C	C3	1	SC	SD	1	176.65	5.31758	0.712382
664	2994	H	H1	C	C4	1	IVC	LQD	0	487.95	7.12617	0.797955
666	3000	H	H4	C	C4	1	SC	LQD	0	512.65	7.25568	0.80603
667	2952	C	C1	H	H4	0	SC	LQD	0	535.15	7.07207	0.780259
668	2998	H	H4	C	C1	0	IVC	LQD	0	499.45	7.25761	0.809624
669	2953	C	C1	C	C4	0	IVC	SD	0	399.5	5.28838	0.61194
670	3063	C	C4	C	C1	0	SC	SD	0	356.15	5.72847	0.675836
671	2954	C	C1	H	H2	0	SC	SD	0	539.8	6.60224	0.727432
672	2986	H	H2	C	C1	0	IVC	LQD	0	546.3	7.09344	0.780063
673	2984	H	H2	C	C4	1	SC	SD	0	448.85	6.54945	0.743412
674	3058	C	C4	H	H2	1	IVC	SD	1	128.95	4.29717	0.612981
675	2987	H	H2	C	C2	1	IVC	LQD	0	429.2	6.99757	0.800143
676	3047	C	C2	H	H2	1	SC	SD	0	346.5	5.88614	0.697699
677	2992	H	H1	H	H4	0	IVC	LQD	0	579.15	7.40088	0.806395
678	3002	H	H4	H	H1	0	SC	SD	0	447.45	6.46045	0.733687
679	2999	H	H4	C	C2	1	SC	SD	0	458.65	6.35864	0.719213
680	3026	C	C2	H	H4	1	IVC	LQD	0	570	7.40294	0.808649
681	3006	H	H1	C	C1	1	SC	SD	1	199.9	5.76393	0.754171
682	3088	C	C1	H	H1	1	IVC	SD	0	446.35	6.6073	0.750667
683	3018	H	H1	C	C4	1	IVC	LQD	0	531.9	7.09701	0.783778
684	3064	C	C4	H	H1	1	SC	LQD	0	545	6.77743	0.745587
685	3025	C	C2	C	C4	1	IVC	SD	0	439.2	6.25058	0.712025
686	3065	C	C4	C	C2	1	SC	SD	0	394.65	5.84436	0.677658
687	3027	C	C2	C	C3	1	IVC	LQD	0	493.1	7.38976	0.826068
688	3070	C	C3	C	C2	1	SC	SD	0	365.1	6.12461	0.719523
689	3028	H	H4	C	C4	1	SC	SD	0	378.55	6.33301	0.739476
690	3059	C	C4	H	H4	1	IVC	LQD	1	137.3	5.13043	0.722489
691	3030	H	H4	H	H2	0	IVC	LQD	0	485	6.82584	0.765085
692	3169	H	H2	H	H4	0	SC	SD	0	449.6	6.37526	0.723441
693	3031	H	H4	C	C2	0	SC	SD	0	370.95	6.18959	0.725202
694	3051	C	C2	H	H4	0	IVC	LQD	0	441.9	7.22858	0.8226
695	3032	C	C3	C	C4	0	IVC	SD	0	330.4	5.84607	0.698628
697	3033	C	C3	C	C1	0	IVC	SD	0	303.55	5.97587	0.724726
699	3060	C	C4	H	H1	0	SC	SD	1	148.5	4.73299	0.656064
700	3078	H	H1	C	C4	0	IVC	SD	0	434.65	6.52997	0.745134
701	3073	C	C3	H	H1	0	IVC	LQD	0	515.65	7.31207	0.811539
702	3177	H	H1	C	C3	0	SC	SD	0	538.45	7.00647	0.772267
703	3087	C	C1	H	H4	0	SC	SD	0	369.7	5.77666	0.677214
704	3118	H	H4	C	C1	0	IVC	SD	0	371.3	6.00105	0.703
705	3119	H	H4	H	H3	0	IVC	LQD	0	448.6	6.7667	0.76814
706	3221	H	H3	H	H4	0	SC	SD	0	358.45	6.51686	0.768006
707	3121	H	H4	H	H1	1	SC	LQD	0	502	7.00818	0.781166
708	3174	H	H1	H	H4	1	IVC	LQD	0	530.75	7.25133	0.801095
709	3164	H	H2	H	H3	1	IVC	LQD	0	482.9	6.97546	0.782399
710	3290	H	H3	H	H2	1	SC	LQD	0	570.55	7.30943	0.798312
711	3194	C	C4	H	H1	0	IVC	LQD	0	524.9	6.93426	0.767422
712	3292	H	H1	C	C4	0	SC	LQD	0	538.6	7.21267	0.794962
713	3239	C	C2	C	C3	0	IVC	SD	0	395.6	6.5422	0.758279
715	3249	C	C3	H	H1	0	IVC	SD	0	327.05	5.35423	0.640983
716	3291	H	H1	C	C3	0	SC	SD	0	545.6	7.06647	0.77725
717	3256	C	C4	H	H2	0	IVC	SD	0	453.7	6.22039	0.70482
718	3373	H	H2	C	C4	0	SC	LQD	0	436.8	6.07865	0.693061
719	3258	C	C4	C	C2	0	SC	LQD	0	541.3	7.32635	0.806844
720	3366	C	C2	C	C4	0	IVC	LQD	0	475.4	6.89237	0.77504
721	3286	H	H3	H	H4	0	IVC	LQD	0	535.7	7.27875	0.802933
722	3315	H	H4	H	H3	0	SC	LQD	0	528.5	7.18004	0.793751
723	3288	H	H3	C	C2	1	SC	SD	0	406.45	5.37449	0.620123
724	3364	C	C2	H	H3	1	IVC	SD	0	394.1	5.98355	0.693959
725	3294	H	H1	C	C2	1	IVC	SD	0	508.95	6.91619	0.769211
726	3369	C	C2	H	H1	1	SC	SD	1	31.4	2.91818	0.586907
727	3316	H	H4	H	H2	0	SC	LQD	0	549.8	7.50665	0.824659
728	3351	H	H2	H	H4	0	IVC	LQD	0	516.7	6.72294	0.745907
729	3318	H	H1	C	C4	1	SC	SD	0	392.65	6.3543	0.737412
730	3360	C	C4	H	H1	1	IVC	SD	1	181.85	5.0925	0.678426
731	3348	H	H2	C	C4	1	SC	LQD	0	429.8	6.91318	0.790305
732	3361	C	C4	H	H2	1	IVC	LQD	1	92.75	4.44397	0.680034
733	3350	H	H2	H	H3	1	SC	SD	0	451.35	6.24213	0.707889
734	3372	H	H3	H	H2	1	IVC	SD	0	318.65	5.54957	0.667365
735	3349	H	H2	H	H3	0	SC	LQD	0	406	6.95006	0.802058
736	3384	H	H3	H	H2	0	IVC	LQD	1	86.1	4.46653	0.694899
737	3395	H	H3	H	H1	1	SC	SD	0	420.1	6.64777	0.762839
738	3401	H	H1	H	H3	1	IVC	LQD	0	488.05	6.81142	0.762689
739	3398	H	H3	C	C3	1	IVC	SD	0	393.5	5.99027	0.694919
740	3423	C	C3	H	H3	1	SC	LQD	0	443.65	7.08107	0.8053
741	3399	H	H1	C	C1	1	IVC	LQD	0	537.05	7.37608	0.813346
742	3436	C	C1	H	H1	1	SC	LQD	0	337.5	6.23958	0.742925
743	3400	H	H1	C	C3	0	IVC	LQD	0	620.6	7.22856	0.779166
744	3424	C	C3	H	H1	0	SC	SD	0	348.75	5.53741	0.655626
745	3404	C	C2	C	C1	1	SC	SD	0	454.65	6.47786	0.733741
746	3433	C	C1	C	C2	1	IVC	LQD	0	522.55	6.88702	0.762736
747	3405	C	C2	C	C3	1	SC	SD	0	470.25	6.65652	0.749842
748	3421	C	C3	C	C2	1	IVC	LQD	0	369.65	6.59573	0.773245
749	3411	C	C2	C	C1	0	SC	SD	0	412	6.17903	0.711346
750	3435	C	C1	C	C2	0	IVC	LQD	0	489.85	6.81155	0.762247
751	3434	C	C1	C	C3	0	IVC	LQD	0	452.7	6.74986	0.765088
752	3456	C	C3	C	C1	0	SC	SD	0	462.15	5.87145	0.663288
753	3443	C	C2	H	H2	1	IVC	LQD	0	497.1	6.93381	0.774099
754	3461	H	H2	C	C2	1	SC	LQD	0	469.4	6.86241	0.773262
755	3441	C	C2	C	C3	0	IVC	LQD	0	489	6.92156	0.774779
756	3453	C	C3	C	C2	0	SC	LQD	0	493.5	7.05402	0.78844
757	3452	C	C3	H	H2	1	SC	LQD	0	528.05	7.16666	0.792379
758	3460	H	H2	C	C3	1	IVC	SD	0	379.9	5.89732	0.688188
759	3458	H	H2	H	H3	1	IVC	SD	0	397.2	5.90786	0.684286
760	3466	H	H3	H	H2	1	SC	SD	0	461.4	6.31436	0.713517
761	3462	H	H2	C	C1	0	SC	LQD	0	566.45	7.41336	0.810587
762	3476	C	C1	H	H2	0	IVC	SD	0	425.5	5.60763	0.642133
763	3465	H	H3	H	H1	0	SC	SD	0	456.4	6.00637	0.67992
764	3506	H	H1	H	H3	0	IVC	LQD	0	459	6.70196	0.757945
765	3475	C	C1	C	C3	1	IVC	SD	0	427.6	5.94854	0.680606
766	3492	C	C3	C	C1	1	SC	LQD	0	496.55	6.94524	0.77551
768	3503	H	H1	C	C3	1	IVC	LQD	0	496.25	6.90617	0.771226
769	3493	C	C3	C	C4	0	SC	SD	0	207.4	4.4024	0.572043
770	3511	C	C4	C	C3	0	IVC	LQD	1	119.05	4.94751	0.717517
771	3504	H	H1	C	C4	1	IVC	SD	0	360.25	5.87206	0.691426
772	3508	C	C4	H	H1	1	SC	SD	1	133.65	5.09213	0.721052
773	3505	H	H1	C	C1	1	IVC	SD	0	421.45	6.03009	0.691599
774	3539	C	C1	H	H1	1	SC	SD	0	431.65	6.47359	0.739536
775	3507	H	H1	H	H4	1	IVC	SD	0	410.45	6.49956	0.748715
776	3546	H	H4	H	H1	1	SC	SD	0	397.05	6.00223	0.695258
777	3512	C	C4	H	H4	1	SC	SD	1	123.65	4.89964	0.70499
778	3549	H	H4	C	C4	1	IVC	LQD	0	409.5	6.85839	0.790353
779	3544	H	H4	H	H2	1	SC	LQD	0	438.7	6.91246	0.787568
780	3569	H	H2	H	H4	1	IVC	LQD	0	487.3	7.0495	0.789544
781	3565	H	H2	C	C4	0	IVC	SD	0	436.85	6.17156	0.70364
782	3596	C	C4	H	H2	0	SC	SD	0	504.45	6.82581	0.760246
783	3566	H	H2	H	H4	0	SC	LQD	0	520.65	7.06041	0.782398
784	3579	H	H4	H	H2	0	IVC	SD	0	349.7	6.06298	0.717524
785	3568	H	H2	H	H3	1	IVC	LQD	0	510.15	7.26596	0.80781
787	3580	H	H4	H	H3	1	SC	LQD	0	255.5	6.27988	0.785274
788	3618	H	H3	H	H4	1	IVC	SD	0	360.75	6.00307	0.706684
789	3597	C	C4	C	C3	1	SC	LQD	0	497.65	7.1702	0.800344
790	3606	C	C3	C	C4	1	IVC	SD	0	447.1	6.42718	0.730009
791	3598	C	C4	H	H3	0	IVC	LQD	0	495.7	6.66115	0.74399
792	3616	H	H3	C	C4	0	SC	LQD	0	495.3	7.06785	0.789526
793	3601	C	C4	C	C2	0	IVC	LQD	0	525.55	6.89955	0.763431
794	3644	C	C2	C	C4	0	SC	LQD	0	443.4	6.84881	0.778946
795	3604	C	C3	H	H3	1	IVC	SD	0	371.8	5.78827	0.677928
796	3615	H	H3	C	C3	1	SC	LQD	0	529.35	7.33792	0.811003
797	3603	C	C3	C	C2	1	SC	LQD	0	444.05	6.67828	0.759366
798	3640	C	C2	C	C3	1	IVC	LQD	0	444.65	6.71494	0.763368
799	3605	C	C3	H	H3	0	SC	SD	0	372.85	6.29549	0.736973
800	3622	H	H3	C	C3	0	IVC	LQD	0	356.65	6.85749	0.808829
801	3621	H	H3	C	C2	1	SC	SD	0	345.05	6.19572	0.734912
802	3643	C	C2	H	H3	1	IVC	SD	0	353.05	6.24647	0.738044
803	3623	H	H3	H	H4	0	SC	LQD	0	416.3	7.08362	0.814075
804	3679	H	H4	H	H3	0	IVC	SD	0	551.35	6.80286	0.747023
805	3653	H	H1	H	H4	1	SC	SD	0	447.85	5.66634	0.643423
806	3677	H	H4	H	H1	1	IVC	SD	0	267.55	5.87009	0.727973
807	3654	H	H1	C	C2	1	SC	SD	0	391.4	5.46754	0.634841
808	3719	C	C2	H	H1	1	IVC	LQD	0	500.3	6.67293	0.744208
809	3655	H	H1	H	H3	0	SC	LQD	0	589.6	7.43752	0.808117
810	3671	H	H3	H	H1	0	IVC	SD	0	377.9	5.9177	0.691179
811	3656	H	H1	C	C1	1	SC	LQD	0	530.8	7.04789	0.778603
812	3750	C	C1	H	H1	1	IVC	LQD	0	389.9	6.60441	0.767361
813	3657	H	H1	C	C2	1	SC	LQD	0	603.45	7.56565	0.81906
814	3674	C	C2	H	H1	1	IVC	SD	0	338.25	6.39498	0.76114
815	3658	H	H1	H	H2	1	SC	SD	0	457.15	6.02965	0.682365
816	3757	H	H2	H	H1	1	IVC	SD	0	446.1	6.10011	0.693102
817	3665	H	H3	H	H4	0	IVC	LQD	0	500.5	7.39332	0.824489
818	3678	H	H4	H	H3	0	SC	LQD	0	472.5	7.25236	0.816333
819	3667	H	H3	C	C2	1	SC	LQD	0	355.3	6.91518	0.816158
820	3675	C	C2	H	H3	1	IVC	LQD	0	364.05	6.91108	0.812315
821	3670	H	H3	C	C1	0	IVC	SD	0	356.35	5.95194	0.702132
822	3752	C	C1	H	H3	0	SC	LQD	0	509.35	7.01188	0.779756
823	3673	C	C2	H	H3	1	SC	SD	0	351.95	5.39184	0.637402
824	3764	H	H3	C	C2	1	IVC	LQD	0	510.15	7.12593	0.792238
825	3676	C	C2	C	C1	1	SC	LQD	0	504.2	7.23932	0.80636
826	3774	C	C1	C	C2	1	IVC	LQD	0	586.9	7.41574	0.80633
827	3681	H	H4	C	C1	1	IVC	LQD	0	466.1	7.17723	0.809666
828	3751	C	C1	H	H4	1	SC	SD	0	412.05	6.23383	0.717647
829	3720	C	C2	C	C1	1	IVC	LQD	0	548.7	7.14682	0.785392
830	3772	C	C1	C	C2	1	SC	SD	0	510.3	6.5909	0.732719
831	3755	C	C1	C	C3	1	SC	LQD	0	375.1	6.56453	0.767689
832	3796	C	C3	C	C1	1	IVC	SD	0	409.9	6.13047	0.706361
833	3756	H	H2	C	C3	0	SC	SD	0	471.55	6.38604	0.719063
834	3793	C	C3	H	H2	0	IVC	LQD	0	508.9	6.77123	0.753097
837	3763	H	H3	C	C1	1	SC	LQD	0	428.3	6.80399	0.778281
838	3773	C	C1	H	H3	1	IVC	SD	0	368	5.70592	0.669433
839	3795	C	C3	H	H4	0	SC	SD	0	433.1	5.40769	0.617436
840	3888	H	H4	C	C3	0	IVC	LQD	0	525.25	7.14678	0.790852
841	3810	H	H3	C	C1	0	IVC	LQD	0	576	7.2392	0.789463
842	3884	C	C1	H	H3	0	SC	SD	0	390.65	6.51933	0.757217
843	3811	H	H3	C	C3	1	SC	SD	0	416.7	5.88008	0.675688
844	3858	C	C3	H	H3	1	IVC	LQD	0	419.85	6.66324	0.764693
845	3813	H	H3	C	C4	1	IVC	SD	0	349.85	6.34817	0.751225
846	3891	C	C4	H	H3	1	SC	LQD	0	419.55	6.74602	0.774278
847	3814	H	H3	H	H4	0	SC	SD	0	465.45	6.70084	0.756098
848	3890	H	H4	H	H3	0	IVC	LQD	0	466.85	6.9912	0.788474
849	3855	C	C3	C	C4	0	IVC	SD	0	294.55	4.56743	0.55685
850	3893	C	C4	C	C3	0	SC	LQD	0	477.45	6.98743	0.78518
851	3856	C	C3	C	C2	1	IVC	SD	0	324.9	4.78139	0.573048
852	3908	C	C2	C	C3	1	SC	LQD	0	426.3	7.16818	0.820569
853	3857	C	C3	C	C1	0	IVC	LQD	0	442.2	7.03921	0.800956
854	3958	C	C1	C	C3	0	SC	SD	0	402.15	6.69815	0.774225
857	3882	C	C1	C	C4	1	SC	SD	0	394.75	6.03606	0.69986
858	3895	C	C4	C	C1	1	IVC	LQD	0	480.05	6.97636	0.783258
859	3883	C	C1	H	H4	1	IVC	LQD	0	394.85	6.38119	0.739842
860	3889	H	H4	C	C1	1	SC	SD	0	482.2	6.39154	0.717072
861	3885	C	C1	C	C4	0	SC	LQD	0	463.25	6.87757	0.776644
862	3928	C	C4	C	C1	0	IVC	LQD	0	510.15	6.8441	0.760901
863	3892	C	C4	C	C2	0	SC	LQD	0	510.65	7.18024	0.79815
864	3910	C	C2	C	C4	0	IVC	LQD	0	516.65	7.36066	0.816673
865	3909	C	C2	C	C1	1	IVC	SD	0	244.85	6.2101	0.782563
866	3956	C	C1	C	C2	1	SC	LQD	0	393	6.83969	0.793618
867	3926	C	C4	C	C1	0	SC	LQD	0	577.95	7.09375	0.773184
868	3959	C	C1	C	C4	0	IVC	SD	0	447.1	6.10915	0.693881
869	3927	C	C4	C	C2	0	IVC	SD	0	530.2	6.84982	0.756863
870	4039	C	C2	C	C4	0	SC	SD	0	452.55	6.0658	0.687586
871	3957	C	C1	H	H4	1	IVC	SD	0	483.95	6.53937	0.73323
872	3975	H	H4	C	C1	1	SC	SD	0	301.85	6.10476	0.741092
873	3976	H	H4	C	C2	1	SC	LQD	0	583.8	7.23152	0.786957
874	4040	C	C2	H	H4	1	IVC	SD	0	290.35	5.57455	0.681372
875	4038	C	C2	C	C1	1	IVC	LQD	0	487.9	7.19099	0.805231
876	4049	C	C1	C	C2	1	SC	SD	0	399.8	5.81152	0.672398
877	4041	C	C2	C	C4	1	SC	SD	0	276.35	6.06673	0.748045
878	4100	C	C4	C	C2	1	IVC	LQD	0	460.85	7.03112	0.79465
879	4050	C	C1	C	C4	1	IVC	LQD	0	432.5	6.77538	0.773751
880	4102	C	C4	C	C1	1	SC	SD	0	432.75	5.79965	0.662282
881	4051	C	C1	H	H3	0	IVC	SD	0	418.75	5.94793	0.682893
882	4069	H	H3	C	C1	0	SC	SD	0	460.6	6.65003	0.751651

## Sheet: Beta
IR	IRWn	T	L	T_coh	L_coh	S	CT	Diet	Ci	UnWUF01	UnWUF02	UnWUF03	UnWUF04	UnWUF05	UnWUF06	UnWUF07	UnWUF08	UnWUF09	UnWUF10	WUF01	WUF02	WUF03	WUF04	WUF05	WUF06	WUF07	WUF08	WUF09	WUF10
2	1272	H	H4	H	H1	1	SC	SD	0	-0.0503202	0.0855984	0.0940202	-0.0736732	0.0942866	-0.0389538	-0.0242412	-0.0680814	0.0366858	-0.0262356	0.160582	-0.0512302	0.0368701	-0.00566071	-0.0236203	0.0500937	0.0149214	-0.0256098	0.0353162	-0.00864396
3	1126	C	C4	C	C1	1	SC	LQD	0	0.112483	-0.0964966	-0.0540262	-0.0416555	0.0340393	0.024139	-0.00882791	-0.0362524	0.0247328	0.0142374	-0.117138	-0.0605107	0.0162381	0.0257975	0.0217193	-0.00893628	-0.031856	0.0137286	-0.0147998	-0.00703389
4	1338	C	C1	C	C4	1	IVC	LQD	0	0.0498642	-0.112177	0.0570581	-0.0262074	-0.0796786	0.00486827	0.0183724	-0.0347217	-0.016896	0.0119028	-0.0848688	0.0132573	0.0261481	0.0303516	0.0223602	-0.00260723	0.00725159	0.029668	-0.00915013	0.0269813
5	1128	C	C4	H	H3	1	SC	LQD	0	0.0952752	-0.0734989	0.00256269	0.0830135	-0.030112	-0.0348479	-0.0679306	0.0511091	-0.00329797	0.0401402	-0.135253	-0.00466251	-0.046555	-0.00732435	-0.0461654	-0.00112803	0.00032712	0.00122247	0.0207694	0.0148308
8	1270	H	H1	C	C4	0	SC	LQD	0	0.109398	-0.0760149	-0.0528293	-0.00371824	0.0546281	-0.0248629	-0.0063614	-0.00375992	-0.00634862	-0.0290885	-0.0896439	-0.0368185	-0.00677066	-0.00646137	0.0285679	0.00574408	0.00774394	-0.00215881	-0.0410533	0.00847902
9	1130	C	C4	H	H4	0	SC	SD	0	0.0550702	0.0690902	-0.058638	-0.0178364	0.018398	0.0532	-0.0591282	0.0265179	-0.0370167	0.00207725	0.0717116	-0.0220688	-0.00627173	0.0124535	0.0231216	-0.0226109	0.00686256	0.02552	-0.0332236	0.00608019
12	1490	H	H2	C	C4	1	SC	LQD	0	0.0768805	-0.0425109	0.0107449	0.0159912	0.101959	-0.004735	-0.0522314	0.0202415	0.0169067	0.007274	-0.0406709	0.0508844	-0.00471358	0.037653	-0.0586062	-0.0247865	0.00671724	0.0440624	0.0769938	0.0287891
14	1467	H	H2	H	H4	0	SC	SD	0	0.022004	0.119642	-0.0447219	0.00795901	0.0285363	0.0442547	-0.0288583	-0.0157438	-0.0257587	-0.016876	0.10987	-0.0575591	0.0360546	0.0162687	-0.00863265	-0.00845104	0.00762458	0.0285108	0.0100851	-0.01293
16	1349	C	C1	H	H4	1	SC	LQD	0	0.0465131	-0.0714913	0.013665	0.0761067	-0.0396446	0.0243407	0.0243741	0.0331223	-0.0598273	0.00164775	-0.0615125	0.0389236	0.0305051	0.0232393	-0.028618	-0.0193154	-0.0312938	-0.00510993	0.0685909	0.00517394
18	1325	C	C2	H	H4	0	SC	SD	0	0.008826	0.110551	0.018011	0.10262	-0.0701648	0.00666404	-0.0210914	-0.0174268	-0.0360943	-0.023231	0.056725	-0.00164328	-0.0204283	0.0369342	-0.0215697	0.0932614	-0.0222842	0.0187338	-0.0242993	0.000709172
20	1271	H	H1	H	H4	1	SC	LQD	0	0.0829726	-0.116267	-0.0420807	0.017235	-0.0849279	-0.0441614	-0.00399007	-0.0213789	-0.0109509	-0.0358078	-0.0832517	-0.0391307	-0.00227338	0.0476963	-0.0114874	0.00382499	-0.0484734	-0.0172694	-0.0104714	-0.00526689
22	1289	H	H2	H	H3	1	SC	LQD	0	0.100834	-0.086426	-0.0394196	-0.00124918	0.0733278	-0.0270711	-0.00430895	-0.0162137	-0.0117322	-0.0641208	-0.106453	0.00275613	-0.000641926	-0.00351487	0.0106318	-0.0425121	-0.0110824	-0.00798682	0.0275046	0.00851593
23	1160	H	H3	H	H1	0	SC	LQD	0	0.0138474	-0.0967833	0.0577431	-0.0501059	-0.0877555	0.0253102	0.0398305	-0.0612606	-0.0971076	-0.0594662	-0.0425609	0.0967288	0.0518539	0.0432223	0.0258743	-0.0288537	-0.0646492	0.0437439	0.00837594	0.0148775
26	1193	H	H4	H	H3	0	SC	SD	0	0.0380029	0.0733865	-0.0278299	0.0632471	-0.0339503	0.0502395	0.0272802	-0.0185751	0.0465545	-0.0395904	0.0593762	0.028043	0.0129021	-0.03748	-0.0140451	0.00778537	0.0177169	0.0404753	0.0430259	0.0049948
28	1352	H	H2	H	H3	0	SC	LQD	0	0.103734	-0.0811264	-0.0577647	-0.0356809	0.0517933	0.04481	0.0381976	-0.0138015	-0.00406089	0.00672868	-0.046058	0.00259598	0.0706324	0.0629247	0.0261076	-0.0120178	0.0234799	0.0103946	0.021449	-0.00241224
30	1478	H	H1	H	H3	0	SC	LQD	0	0.114267	-0.0728612	-0.0318244	-0.00501992	-0.00936567	0.00723316	0.0670242	0.0498107	0.0151848	-0.00165757	-0.104063	-0.0129439	-0.00923511	0.0021388	-0.00305848	-0.0140725	0.0582371	0.004759	0.00351476	0.0169155
34	1213	H	H2	C	C3	1	SC	LQD	0	0.0514839	-0.0237803	0.0603923	0.061603	-0.0566629	0.000527869	-0.0429029	0.0160021	-0.0226371	-0.013016	-0.0709898	0.0727054	-0.0149143	0.00498603	-0.069802	-0.00629641	0.0020268	0.0560109	0.067202	0.00613625
38	1269	H	H1	C	C3	0	SC	LQD	0	0.0869112	-0.0768054	-0.0270806	-0.0487138	0.0434587	-0.0170002	0.000992681	-0.0304326	-0.00965061	-0.0569229	-0.0822368	-0.0415461	0.00981676	0.0329643	0.00557718	0.00751858	0.00846393	-0.00639071	-0.0057085	-0.0112212
40	1513	C	C2	H	H4	1	SC	LQD	0	-0.000246606	-0.0679848	0.0736097	-0.0864336	0.0539638	0.00462198	-0.0243975	-0.0634955	0.00529573	0.0531039	-0.0360813	-0.0379063	0.08748	0.0433066	0.0378832	0.0180467	-0.0132489	-0.045977	-0.02277	-0.0347852
41	1214	H	H2	C	C1	1	SC	SD	0	-0.0196482	0.153986	0.0211199	-0.0127563	0.0646783	-0.0372496	-0.0191684	-0.0479742	0.0181661	-0.0779374	0.0963236	-0.0400008	-0.0441057	0.031883	-0.027735	0.0160269	0.0383536	0.0178326	0.0016405	-0.021793
42	1336	C	C1	H	H2	1	IVC	SD	0	-0.10982	0.0014756	0.0838709	-0.0488117	-0.00239925	0.0414318	0.120173	0.00430036	-0.185728	-0.022036	0.0969062	0.098464	0.0511939	-0.0557139	0.0575027	0.00630443	0.0317309	-0.0157864	-0.0174634	0.0187191
44	1273	H	H4	H	H2	0	SC	SD	0	-0.130477	0.0172492	0.138342	-0.10052	0.0362138	-0.00976464	-0.101633	-0.101222	-0.0332418	-0.00697165	0.0439585	0.0155947	0.0033867	0.0674388	-0.0229597	0.00269703	-0.0132905	0.0170903	-0.0128268	-0.0135627
50	1337	C	C1	H	H1	0	SC	SD	1	-0.534808	-0.0670295	-0.0129082	0.0678463	-0.0110088	-0.0154699	-0.0154522	-0.0429253	0.0685753	0.0413427	0.135564	0.19924	0.0530288	-0.040637	-0.00534441	-0.0232672	-0.0335068	-0.00883	-0.0169968	-0.0352405
54	1419	H	H2	H	H3	0	SC	SD	0	-0.0119209	0.0592776	0.0357155	-0.0936259	-0.0363404	-0.0540927	0.0253704	0.0334258	0.0589716	0.00321375	-0.00369846	0.0959426	-0.0379023	-0.0682487	-0.0122722	-0.0223511	-0.0317069	0.00646421	-0.001826	0.0121881
56	1268	H	H1	H	H3	1	SC	SD	0	0.0318916	0.056687	-0.0753011	-0.010639	-0.0860246	-0.0355047	0.0250797	-0.0183353	-0.0144397	-0.0618622	0.0385136	-0.0135624	-0.190843	0.0729086	0.00842947	-0.0234508	-0.0148712	-0.0687929	-0.00340863	0.0289693
58	1264	H	H4	H	H3	1	SC	LQD	0	0.0809359	-0.0801776	0.0106116	-0.0153909	-0.0202228	-0.0105378	0.0220457	0.0305551	-0.000455685	-0.0764905	-0.126835	0.0233491	-0.0109671	-0.0696155	0.0326944	-0.00451349	-0.0160098	-0.00294535	-0.0112071	-0.0333593
60	1275	H	H4	C	C4	1	SC	LQD	0	-0.0421707	-0.0361498	0.128937	-0.075696	0.134143	0.000678048	-0.058119	-0.0431748	0.000180018	-0.0297482	-0.0676137	-0.00278925	0.0682275	0.0651677	-0.0106058	0.000821314	0.00799723	0.0283684	0.0490771	-0.0176327
62	1328	C	C2	C	C4	0	SC	LQD	0	0.0840087	-0.0360803	0.0100583	0.0320591	0.0593648	0.053443	-0.0164382	-0.0506638	-0.0134353	-0.00302382	-0.0409154	-0.0691507	0.070441	0.0102743	0.0369099	-0.0194537	-0.0355787	0.0065512	0.0317318	-0.0182668
64	1529	C	C1	C	C4	1	SC	LQD	0	0.0714211	-0.0803763	0.0341623	0.0327251	-0.0715445	0.0690517	-0.0488479	0.00488382	-0.0232616	0.0655314	-0.0768946	0.0355566	0.0291763	-0.0407771	0.0453431	0.0250936	-0.00428026	-0.02096	-0.0284468	0.000461598
66	1334	C	C1	H	H4	0	SC	SD	0	-0.148439	0.0122025	0.196089	-0.0616243	-0.0375156	-0.082681	-0.050466	0.00869791	-0.0468104	-0.0152663	0.0278695	0.0589191	0.00852619	-0.0102785	0.00576203	0.0257234	-0.0645241	-0.0299638	-0.01684	0.0210024
70	1339	C	C1	H	H3	1	SC	LQD	0	0.0892067	-0.0947957	0.0124972	0.00133468	-0.0105198	0.0445334	0.020044	0.0127406	0.00819512	0.00529644	-0.0821324	-0.0133387	0.0468489	0.034807	0.0268786	0.0194776	0.0310368	0.00920881	-0.010623	0.00903697
71	1284	H	H3	H	H1	1	SC	LQD	0	0.102333	-0.080954	-0.0766482	-0.00599009	-0.0211159	0.0330272	-0.0519274	-0.0297021	0.0174024	0.0412171	-0.117405	-0.0302166	0.0130907	0.0122096	0.0252125	0.0144024	-0.0402252	0.00901915	-0.0237297	0.0174258
72	1300	H	H1	H	H3	1	IVC	LQD	0	0.101205	-0.0798633	-0.0346596	-0.0343378	0.052394	-0.0189562	-0.00205587	-0.0242839	0.0207618	-0.0409163	-0.151453	0.00665271	-0.0361974	-0.0708452	0.0210191	-0.0313852	0.00295053	0.00826637	-0.00705748	-0.0356053
73	1285	H	H3	C	C4	0	SC	SD	0	0.0546135	0.107101	-0.0466685	0.0342745	0.0550219	-0.0276691	-0.0198215	0.0064072	0.0193902	0.00316741	0.0916909	-0.114031	-0.00821726	-0.00348484	-0.013134	-0.021092	0.00145628	0.0136646	-0.0523706	-0.0545049
74	1511	C	C4	H	H3	0	IVC	SD	0	0.0291163	0.0384669	0.00441301	0.0735174	-0.0836773	-0.0293966	-0.0355377	0.00893716	0.00935188	0.0362428	-0.0326994	-0.0515478	-0.00945822	0.0426841	-0.0514906	0.109986	-0.00197753	-0.00652839	-0.0575873	-0.016942
77	1287	H	H2	C	C2	0	SC	LQD	0	0.0986891	-0.0541817	-0.0691839	-0.00996944	0.0449865	0.0581059	0.00363686	-0.0251806	0.0444627	-0.028864	-0.0447231	-0.014878	0.0377376	0.0336045	0.0331086	-0.0215541	-0.0130253	0.0217026	0.000655516	0.00621484
78	1572	C	C2	H	H2	0	IVC	SD	0	0.0095363	0.110571	0.065475	0.105766	-0.0162076	0.0112835	0.0315158	-0.0276075	0.0120415	-0.00637719	0.0236682	-0.0175907	-0.0617798	0.058461	-0.0807885	0.00426315	-0.0410577	0.00440853	-0.0161777	-0.00712567
79	1288	H	H2	C	C1	0	SC	LQD	0	0.0721156	-0.0569284	0.0176052	0.0264241	0.0657753	0.00512243	-0.0102084	-0.0138488	-0.0880585	-0.0169952	-0.0399791	0.0271518	0.0107053	0.0446488	0.0177681	-0.0148587	0.0329369	-0.0121059	-0.001678	0.00738066
80	1434	C	C1	H	H2	0	IVC	LQD	0	0.10212	-0.0363568	-0.036377	-0.00718719	0.0532056	0.00470299	-0.0427068	-0.00428764	0.0251141	0.0204417	-0.103748	-0.0100275	-0.0238618	-0.0636304	0.00404641	0.0313427	0.01663	-0.0245644	-0.0190166	-0.0121195
81	1290	H	H2	H	H1	1	SC	SD	0	0.0513225	0.0610039	-0.0155985	0.039099	-0.0332495	0.0255368	0.0353454	0.0177135	-0.037601	-0.0343274	0.115431	-0.1372	0.0570011	-0.0299813	-0.0457964	0.0243967	0.0227124	-0.0344151	0.00704675	-0.00118347
82	1533	H	H1	H	H2	1	IVC	LQD	0	0.124361	-0.108115	-0.0626661	-0.0408492	0.0525993	-0.0429487	0.0219049	-0.00904325	0.0331765	-0.0457339	-0.122064	-0.0283742	-0.0284753	-0.00798026	-0.00865681	-0.0185072	-0.0163125	-0.0188473	0.0143261	-0.0137569
84	1402	C	C4	H	H2	1	SC	SD	0	-0.0235042	0.00920811	0.071693	-0.00177999	-0.0152962	-0.025733	0.0112321	0.0137859	-0.0635799	-0.0442085	0.0266319	-0.0252165	-0.0123059	0.0185161	-0.0426365	0.00175664	0.00414994	-0.0115502	0.0427797	-0.0239048
85	1297	H	H1	H	H4	0	IVC	SD	0	-0.00849641	0.12106	-0.0368037	-0.0729478	-0.120735	-0.0452616	0.0176288	0.0194706	-0.0415036	0.037763	0.0799046	-0.0491706	-0.117562	0.0996704	-0.0143793	-0.0167009	-0.0022115	0.0205717	-0.0795448	-0.0366473
86	1312	H	H4	H	H1	0	SC	LQD	0	0.112937	-0.0722329	-0.0105553	-0.0425356	0.0461224	-0.00021239	0.00948151	-0.012838	0.0441475	0.00236784	-0.0630559	0.025247	0.0342251	-0.0132186	0.0540323	-0.0295878	-0.0248813	-0.00508887	-0.0152292	0.019867
87	1298	H	H1	H	H2	0	IVC	LQD	0	0.112721	-0.0832165	-0.0374089	-0.0357901	0.0492862	0.00277308	-0.0104907	-0.0192092	0.0330429	-0.0138441	-0.143571	-0.0306805	0.00418517	-0.0331728	0.0461686	0.0117135	-0.0203961	0.00962917	-0.0251829	0.000853322
88	1417	H	H2	H	H1	0	SC	LQD	0	0.116766	-0.0957294	-0.0525538	-0.00766409	0.027736	0.0323823	-0.0127989	-0.00809629	0.0333181	-0.0106487	-0.101013	-0.0128404	0.0407377	-0.0363382	0.0644886	0.0118507	-0.0218915	-0.023854	-0.0357658	-0.00233208
89	1301	H	H1	C	C1	1	IVC	SD	0	0.0477268	0.0372288	-0.112247	-0.0902627	-0.0110442	-0.0166032	0.0338186	-0.0286781	-0.0545949	0.00833037	0.128561	-0.125405	-0.118194	0.0512741	0.0940704	-0.0376488	0.0332214	-0.0175842	-0.00184933	-0.0760832
90	1383	C	C1	H	H1	1	SC	SD	0	0.0310551	0.100337	-0.103137	-0.0398265	0.0260308	0.028833	-0.0190999	0.0131336	-0.057507	0.0380743	0.10684	0.00240963	-0.0863105	0.0252389	0.0354567	-0.0424962	0.0194847	0.0421324	-0.0100966	0.024456
91	1310	H	H4	H	H2	1	SC	SD	0	0.00556839	0.107052	-0.00539829	0.0970639	-0.076888	0.000787218	0.0206035	-0.0724404	-0.000422819	-0.0185404	0.0694874	-0.00119105	-0.0793023	0.0805066	-0.0504945	0.0054091	0.0166724	0.0237099	-0.0487558	-0.0169065
93	1313	H	H4	C	C1	0	IVC	SD	0	-0.0108323	0.0781004	0.043657	-0.0813523	-0.0537945	0.0336075	0.0627975	0.00636624	0.0838414	0.0256491	0.122308	0.000199601	0.0126263	-0.044666	0.00705654	0.0352156	-0.0308903	-0.00396731	0.0282789	-0.00445313
94	1531	C	C1	H	H4	0	SC	LQD	0	0.10685	-0.0853047	-0.0179898	0.0467763	-0.00749521	0.0288567	0.0143949	0.0574485	0.0629793	0.0390138	-0.0838001	-0.0397031	0.0131239	-0.00884066	0.0208544	-0.00791789	-0.020622	-0.042701	-0.00366904	-0.0160222
97	1317	H	H2	H	H4	0	IVC	SD	0	0.0362185	0.0849029	-0.0553423	0.0275917	-0.0457182	0.0242229	0.00455669	0.0155829	3.92757e-05	-0.0580214	0.051596	-0.0811205	-0.00579597	0.0390786	-0.0202307	-0.0263932	0.0392636	0.0448407	-0.0251871	-0.0509387
98	1638	H	H4	H	H2	0	SC	LQD	0	0.103888	-0.0382326	0.0260779	0.0821905	0.0226098	0.023573	0.0145504	0.0291975	0.0461943	-0.00427911	-0.0877978	-0.0257883	0.0219797	0.0207586	-0.027746	0.054756	0.0475704	0.0197129	0.0116631	-0.00798574
100	1528	C	C1	H	H2	1	SC	SD	0	-0.0169675	0.076319	0.0585588	-0.000312322	-0.0659389	-0.0929296	-0.061665	0.0453152	-0.0118364	0.102921	0.0168771	0.100348	-0.094064	-0.0423802	-0.0690574	-0.000141831	-0.0511309	0.00306362	0.0104431	0.0144295
101	1321	H	H2	H	H3	0	IVC	SD	0	0.0098448	0.128612	-0.0960751	-0.0287113	0.0286326	0.058482	0.0283303	-0.0123736	-0.0545164	-0.0602265	0.128084	-0.00375984	0.0189255	-0.0737231	0.0199263	-0.0146083	-0.0390011	0.0499438	-0.0172323	-0.00260302
102	1521	H	H3	H	H2	0	SC	SD	0	0.0364271	0.106483	-0.0810504	0.0285217	0.0212537	0.0268433	-0.0198649	-0.000210846	-0.0240293	-0.050193	0.148884	-0.104063	0.0511751	-0.055255	-0.0417313	-0.00249558	-0.0651916	-0.0325059	0.00304088	0.0531387
103	1323	C	C2	H	H1	0	SC	SD	0	0.0855141	0.0150145	-0.0450906	0.00608962	-0.0307975	-0.0154637	0.0212472	0.0512285	0.00264315	-0.0169032	0.0572107	-0.107573	-0.0330218	-0.0509281	-0.0118556	-0.00594576	0.0168138	-0.0263121	-0.0234829	-0.0111243
104	1536	H	H1	C	C2	0	IVC	LQD	0	0.0910093	-0.129488	-0.0330646	0.0132743	-0.0454023	-0.0298658	-0.00524027	-0.00149838	-0.0130804	-0.0800503	-0.140215	0.0275956	-0.0576371	-0.0414687	-0.0205982	-0.0259934	-0.0100584	-0.0211074	0.0069896	-0.00584676
107	1326	C	C2	C	C1	1	SC	LQD	0	-0.0149523	-0.000212128	0.113408	0.0566367	0.0317151	-0.00104368	-0.0166866	0.0351846	-0.0487948	0.000495059	-0.109662	0.0175146	0.0450552	-0.064968	0.0460613	0.0188785	0.0112395	-0.0142014	-0.0161909	-0.0123722
108	1432	C	C1	C	C2	1	IVC	SD	0	-0.00408614	0.138331	-0.0616176	-0.0525532	0.0482652	-0.0280263	-0.013276	0.0465679	-0.0545262	0.0515625	0.153091	-0.168622	0.00259566	-0.0178766	0.0143022	-0.0355631	0.0330991	-0.0469698	-0.0514967	-0.0187308
109	1327	C	C2	C	C4	0	SC	SD	0	0.0747636	0.0151191	-0.026005	0.0242373	-0.108448	-0.0077422	-0.0192417	0.0293605	-0.0437072	0.0432467	0.0229423	-0.00705817	-0.0812908	0.0112818	-0.0130166	-0.0124695	-0.0124135	0.00653172	-0.0667735	0.030835
110	1508	C	C4	C	C2	0	IVC	LQD	0	0.0301744	-0.125658	0.0200341	-0.0231385	-0.0986411	0.00171754	-0.0348767	-0.0335991	-0.0581281	0.000906783	-0.103767	0.00269875	0.0101119	0.00206835	0.013458	0.0233403	-0.0144353	0.00178636	-0.0191788	0.0189841
111	1329	C	C2	H	H2	1	SC	LQD	0	0.0914828	-0.0859565	-0.0162794	-0.0331963	0.0371547	0.0478155	-0.0125724	-0.0472125	0.0146301	-0.00268123	-0.0755579	-0.036969	0.0378856	-0.0379469	0.0671193	-0.0339231	0.0067074	-0.00141343	0.00100053	-0.0044796
113	1330	C	C2	H	H4	0	SC	LQD	0	0.0606298	-0.0711425	-0.0346142	-0.0242004	0.0311999	0.0557662	0.00668248	-0.0591282	-0.00577763	0.0147435	-0.0168436	0.0117644	0.0510969	-0.0533566	0.0866598	-0.0159136	-0.0316139	0.0168383	-0.0034359	0.0101062
114	1457	H	H4	C	C2	0	IVC	LQD	0	0.0976789	-0.111166	-0.0494206	-0.0115493	0.0533307	0.0112296	-0.00265338	-0.0189888	0.0498355	-0.0154178	-0.1323	0.00875795	-0.00351782	-0.0402878	0.0032708	-0.00592651	-0.00682484	0.00533189	0.019592	-0.0159431
115	1331	C	C2	C	C1	1	IVC	LQD	0	0.093246	-0.0639382	-0.000136861	0.0643597	0.0429032	-0.0114509	-0.040637	-0.0131847	-0.0445737	-7.18468e-05	-0.107154	-0.0263697	0.00538509	0.0168918	-0.0209992	-0.0158889	-0.0330416	-0.0109604	0.0359165	-0.00693595
116	1391	C	C1	C	C2	1	SC	SD	0	0.0134356	0.138084	0.00175132	0.0753172	0.00491979	0.00926984	0.0327537	0.0657566	0.0123224	0.0184165	0.134994	-0.0188095	0.0793666	-0.0789167	0.00484335	-0.0127637	-0.0222315	0.0180363	0.0289512	0.0529669
117	1332	C	C2	C	C3	1	IVC	SD	0	-0.0401581	0.132287	0.030599	-0.0580402	0.0902793	-0.0239024	-0.0182695	-0.00535723	0.0306145	-0.0212231	0.129173	-0.00863097	-0.036656	-0.00279569	-0.0330354	-0.03308	-0.020049	0.0177068	0.0388967	-0.0283791
118	1601	C	C3	C	C2	1	SC	LQD	0	0.0969886	-0.0195596	-0.0488018	0.0412735	0.0521912	0.0779026	-0.0244233	-0.0335375	0.0032898	0.0188387	-0.0443011	-0.0283722	0.0467161	-0.00903211	0.0372032	0.00817475	0.0129839	0.0149589	0.00949928	-0.00532263
121	1344	C	C1	C	C4	1	IVC	SD	0	-0.128593	0.127118	0.0912642	-0.0294447	0.0147709	-0.0191762	0.0620961	0.0692211	-0.031624	-0.016505	0.11486	-0.0779127	0.0171532	-0.0183814	-0.00233237	0.00823573	0.0270503	-0.0136129	-0.0184422	-0.0161254
122	1584	C	C4	C	C1	1	SC	SD	1	-0.577592	-0.0487859	-0.0721445	0.0576812	0.0132144	-0.00750219	-0.0579095	-0.0644857	0.0424795	-0.0334217	0.10003	0.228927	0.0194036	0.0257742	-0.0435004	-0.0430997	0.0545062	-0.0111772	0.00069882	-0.0203657
125	1348	C	C1	H	H1	1	SC	LQD	0	0.104665	-0.0622969	-0.0448859	-0.00673993	0.0412164	0.0313282	-0.00292012	0.00759616	0.0526246	0.0344768	-0.137917	0.0133564	-0.024168	-0.0753211	0.0353771	0.0156614	0.0195712	-0.00270974	-0.0481729	-0.0167828
127	1353	H	H2	C	C4	0	SC	SD	0	0.0376015	0.0785842	-0.0831359	-0.0359533	0.0243072	0.0197257	0.0422056	-0.0148333	-0.0392001	0.00314687	0.0830392	-0.0942265	0.0570904	0.0282235	-0.0193157	0.00190381	0.0688003	0.0109946	-0.00375815	-0.0443112
128	1728	C	C4	H	H2	0	IVC	LQD	0	0.0574204	-0.10375	0.0695459	0.0246399	0.0109965	0.0234556	0.0360574	-0.000339356	-0.0058815	-0.0417434	-0.0850551	-0.0391032	0.0434054	-0.0485679	0.0497706	0.0110447	-0.0137305	-0.0125258	-0.0164025	-0.00388277
129	1355	H	H2	H	H4	1	IVC	SD	0	-0.0275725	0.124875	-0.0168656	-0.0814432	-0.0526283	0.061467	0.0437959	0.0534981	0.0162316	0.0293518	0.110689	0.0646516	-0.0515883	-0.03528	-0.0053088	-0.0063827	0.00382064	0.0738624	-0.0344251	-0.0115821
130	1507	H	H4	H	H2	1	SC	LQD	0	0.0205535	-0.066135	-0.0118175	-0.0303617	-0.0456409	0.0818544	0.0437353	0.00187442	-0.0226198	-0.0128823	-0.0659626	0.0259199	0.0556254	0.0330047	0.0500602	0.035834	-0.0296397	0.0390294	-0.0210811	0.0304964
131	1379	C	C1	H	H3	0	SC	SD	0	0.0533336	0.0695365	-0.0614585	-0.0473944	0.0198914	0.00150257	-0.00315356	-0.0141451	0.0557817	0.112275	0.01662	0.0423891	-0.0202001	-0.117108	0.0308793	0.0199677	0.00539191	0.027404	-0.00150785	-0.0103559
133	1380	C	C1	C	C3	0	IVC	SD	0	0.0188187	0.0984442	-0.0588378	0.0297395	-0.118291	0.0452071	-0.0358903	-0.00559941	-0.0321433	0.0326865	0.105734	0.0307948	-0.136356	0.0733272	0.0863207	-0.00344883	-0.00250097	0.0227838	0.00422005	0.0561392
134	1764	C	C3	C	C1	0	SC	SD	0	-0.0507152	0.172225	-0.0509323	-0.0370444	0.0659063	0.0140521	0.0405026	-0.0188059	-0.00830851	0.013835	0.177907	0.0456522	-0.124564	-0.0309758	0.0298393	-0.0597544	-0.0136735	0.0325221	0.0603301	-0.021985
135	1381	C	C1	H	H2	1	IVC	LQD	0	0.0962718	-0.115572	-0.0487519	-0.0446209	0.043881	0.0453189	0.0149331	-0.00227096	-0.0467543	0.0630933	-0.100282	0.00922033	0.034129	-0.0596365	0.0573104	-0.0288861	0.00900027	-0.0083917	0.0231642	-0.0296757
136	1420	H	H2	C	C1	1	SC	LQD	0	0.0457672	-0.058906	0.0273674	0.0168788	-0.0667634	0.0583647	-0.0155029	-0.0355432	0.0131457	-0.00843888	-0.0580529	0.0388011	0.00689733	0.00431465	0.0144108	-0.00811004	-0.036513	0.00867499	0.00734918	0.0283824
137	1384	C	C1	C	C2	0	IVC	SD	0	0.0342066	0.0479529	-0.0494568	0.00503307	-0.0162484	-0.0013284	-0.0796265	-0.0336708	-0.0575635	0.0607822	0.0279406	0.0459923	-0.0747513	-0.00505516	-0.00427398	-0.05657	0.00544212	0.0319392	-0.0373262	0.0401065
138	1517	C	C2	C	C1	0	SC	LQD	0	0.0730363	-0.126898	-0.0175403	-0.0585788	0.0486906	0.0490791	-0.0294492	-0.0281278	-0.0569641	0.035186	-0.070785	-0.0291354	0.0493675	0.0011403	0.0567969	-0.0289718	-0.0316661	-0.00927412	0.00954051	0.00466323
139	1385	C	C1	H	H4	1	IVC	LQD	1	-0.525718	-0.0726544	-0.00305488	0.0293295	-0.020046	0.0696731	-0.0922214	0.022437	0.0749924	0.0327055	0.0736473	0.126395	0.0885876	0.115483	-0.0334584	-0.0598293	0.0114696	-0.0677318	0.0124116	-0.00605372
140	1505	H	H4	C	C1	1	SC	SD	0	-0.00448763	0.0659095	-0.019373	-0.0456706	-0.0891433	0.023021	-0.0437796	0.0339509	0.00318296	0.110528	0.0757744	0.0259215	-0.138406	0.0489272	0.0651923	-0.0310043	0.00890474	0.00349499	-0.0342248	0.0559516
141	1386	C	C1	C	C3	1	IVC	LQD	0	0.0900315	-0.0691474	-0.0161078	0.0491397	0.00505181	0.0266149	-0.00535483	0.0334336	-0.023766	-0.0068043	-0.10489	-0.00523383	0.0280985	-0.0325425	0.0333615	-0.0169686	0.00860482	-0.00891864	0.00643174	0.00593469
142	1566	C	C3	C	C1	1	SC	LQD	0	0.0543342	-0.0279865	0.091697	0.0296381	0.0556104	0.0176528	0.0549979	0.0155862	-0.0502707	-0.032049	-0.0704625	-0.0246386	0.0601999	0.0744668	-0.0400282	0.0135199	-0.00793669	0.0181492	0.046025	-0.0288108
144	1705	H	H1	C	C1	1	SC	LQD	0	0.0761298	-0.127342	-0.0438346	-0.0118109	-0.089701	0.00143453	-0.0367799	-0.0230566	-0.0360378	-0.00692837	-0.0731131	0.0323876	-0.0564993	0.00479668	-0.00436253	-0.058691	-0.0176583	0.0109599	-0.0139607	0.0381966
145	1388	C	C1	C	C4	0	IVC	LQD	0	0.0757593	-0.00449204	0.0155159	0.0647787	0.101734	-0.0310257	-0.035667	0.0330034	-0.0241463	0.00751507	-0.0581601	-0.0650257	0.0357909	0.00233165	0.00858305	0.00469151	0.00479643	-0.0141948	0.00488199	-0.0154873
146	1603	C	C4	C	C1	0	SC	LQD	0	0.0738803	-0.103157	0.0225112	-0.0217201	-0.0154977	0.0250644	0.00851229	-0.00723401	-0.0113143	-0.0180045	-0.106906	-0.00665063	0.0324421	0.0226645	0.021621	-0.0220936	0.0114685	0.01221	0.029836	0.0101353
147	1389	C	C1	H	H3	1	SC	SD	0	0.022755	0.128041	-0.0511214	0.0312896	-0.0382677	0.015472	0.0118239	0.0697379	-0.0215961	0.0335496	0.130498	-0.0965442	-0.0315339	0.00518829	0.00662232	-0.0337106	-0.00318697	0.000737834	-0.00664577	-0.0233121
149	1390	C	C1	H	H2	0	IVC	SD	0	0.0447486	0.0617862	-0.0204201	0.0694833	-0.0716292	-0.00146977	-0.0332939	0.0264456	-0.0422566	0.0547591	0.0367606	0.0447986	-0.0737494	-0.0149674	-0.00226252	-0.0405903	0.0095947	0.0436216	-0.0553309	0.047857
150	1487	H	H2	C	C1	0	SC	SD	0	-0.034584	0.133636	-0.0406281	-0.0281345	0.0495473	0.0628186	0.0362642	-0.0468748	-0.0749311	-0.0729695	0.177791	0.0210598	0.0794617	-0.133195	-0.0210592	0.0119824	0.0133884	0.0558512	0.0259058	0.0125113
151	1400	C	C4	H	H1	0	SC	LQD	0	0.0635407	-0.118963	-0.0167152	-0.0612987	-0.0141954	0.0199697	-0.00393631	0.0397401	0.0244906	-0.00441153	-0.067815	0.00486729	0.0344586	8.03686e-06	0.0365752	0.00120163	-0.0202877	-0.00629336	0.000763834	0.00955397
152	1535	H	H1	C	C4	0	IVC	SD	0	0.0784205	-0.0217573	-0.0560824	-0.0506435	-0.051877	-0.0572551	0.0382734	0.00822163	-0.020632	-0.0655441	0.0182978	-0.0525015	-0.0623379	-0.0356882	-0.0217525	-0.047496	0.00895424	-0.0317335	0.0107373	-0.0169122
155	1403	C	C4	C	C1	0	IVC	LQD	0	0.103868	-0.0826315	-0.010546	-0.0232391	0.0959571	-0.0671308	0.013631	0.0316059	-0.0825197	0.0316551	-0.139359	-0.0299314	-0.0503724	-0.0404717	-0.0258605	-0.0548339	-0.000165337	-0.018913	0.0353909	-0.00514807
156	1436	C	C1	C	C4	0	SC	LQD	0	0.1042	-0.0620176	-0.0554329	-0.0137073	0.0637028	-0.0259919	-0.0320391	0.0118143	-0.00576777	-0.00649002	-0.0785532	-0.0602184	-0.00152344	-0.00400529	0.0446592	-0.0234813	-0.0117707	0.00517849	-0.0231562	-0.0129596
157	1412	H	H2	C	C3	1	SC	SD	0	-0.107659	0.0459314	0.104968	-0.0523556	-0.0561378	-0.0627321	-0.0553866	0.00857772	0.0311313	0.0064232	0.0289767	0.0427766	-0.0134038	0.0355029	-0.0526619	0.0235973	-0.000177316	-0.0229095	0.0321764	0.0162669
158	1600	C	C3	H	H2	1	IVC	SD	0	-0.0142282	0.156421	0.0115214	0.0580929	0.00611752	0.0471607	0.110052	-0.0138336	-0.0161341	-0.0235567	0.143493	-0.0478	0.0377614	-0.00662413	0.011656	-0.0192589	0.0019876	0.062359	-0.0206892	0.00854931
159	1413	H	H2	C	C2	0	IVC	LQD	0	0.0733559	-0.091277	-0.0123178	-0.0346181	-0.0025798	0.0192174	-0.0753083	-0.0222564	-0.00874347	0.00865608	-0.103182	-0.00754884	0.00161849	-0.00208048	0.0182796	0.0137628	-0.0307508	-0.0283843	-0.0214684	0.0233803
160	1512	C	C2	H	H2	0	SC	SD	0	0.00231901	0.0685503	0.0339796	0.0071663	0.0617233	-0.00740306	-0.0325017	-0.0212637	-0.0702762	-0.0134956	0.175695	-0.0755145	0.0943767	-0.0833795	-0.0604055	0.00503746	-0.00938009	0.00645676	0.0257248	0.100937
162	1545	C	C1	H	H2	1	SC	LQD	0	0.0937816	-0.0659119	-0.048202	0.0148412	0.0733358	0.00633914	-0.0402788	0.0373423	0.0137598	0.0268927	-0.106647	-0.00662934	0.0208768	-0.00885586	0.0241244	0.00933029	0.0315678	0.000813744	0.00180905	0.00875187
163	1416	H	H2	H	H4	0	SC	LQD	0	0.0688187	-0.0366916	0.0145238	0.0348183	0.0122746	0.0731012	-0.00396391	0.0170681	0.0261587	-0.0394321	-0.0675186	-0.0339374	0.0337284	0.0323782	-0.00756328	0.0283904	-0.0606541	0.0176294	0.0149386	-0.0164144
164	1797	H	H4	H	H2	0	IVC	LQD	0	0.0963811	-0.0126406	0.00442671	0.0673634	0.0868708	-0.0140492	-0.0254897	0.0232905	-0.0096086	-0.00283969	-0.0907977	-0.108192	0.0413194	0.00455738	-0.00416399	0.0709808	-0.0210723	-0.0063311	-0.0115848	-0.0434209
165	1424	H	H2	H	H1	0	SC	SD	0	0.00513406	0.120989	-0.0735349	0.00521413	-0.0407138	0.0647413	0.0567594	0.0275919	-0.0263327	-0.00727587	0.105019	-0.0535739	0.000161799	0.0218865	0.0065336	-0.00973379	-0.024009	0.0195156	-0.0346177	-0.035058
166	1479	H	H1	H	H2	0	IVC	SD	0	0.0453533	0.09903	-0.0435227	-0.0108072	-0.0330717	0.0348797	0.0593466	0.0556744	-0.0189032	-0.00782905	0.0348733	-0.0828227	-0.0433856	0.0486879	-0.0542106	-0.0795075	0.029154	0.0305243	-0.0119513	-0.0296965
168	1553	H	H3	H	H2	1	SC	SD	0	-0.0272302	0.112629	0.00174741	0.0259757	-0.107103	0.0232223	-0.0339959	-0.0172149	0.00246445	-0.0377368	0.0497712	0.0209103	-0.0371507	0.0200606	-0.00488937	0.0762139	-0.0304862	0.00492517	-0.018052	0.0083672
169	1433	C	C1	H	H3	0	SC	LQD	0	0.0768159	-0.0588185	0.0335392	0.0265777	-0.000995986	0.0262917	0.057332	-0.0142439	0.0166206	0.00467684	-0.0577618	0.0114817	0.0558343	-0.0287335	0.0474601	0.0237375	0.0441282	-0.0177199	-0.00124208	-0.00619237
171	1435	C	C1	H	H4	0	IVC	SD	0	-0.000368509	0.0546015	-0.0393137	-0.0103213	-0.118568	-0.00861404	0.0218356	-0.0119844	0.0047984	0.0319246	0.131956	0.0757258	-0.144861	0.048697	0.127635	0.0457206	-0.0101573	0.0137814	0.0478281	0.0556143
172	1665	H	H4	C	C1	0	SC	LQD	0	0.08751	-0.0858713	-0.011973	0.0319415	0.000734863	-0.0190053	0.0361291	0.0222561	0.0280827	0.00316317	-0.100159	0.0240081	-0.00681062	-0.0421216	0.028535	0.031749	-0.00775606	-0.00472889	-0.0244564	0.0067513
173	1458	H	H4	H	H3	0	IVC	SD	0	-0.0290238	0.0868907	0.0101303	-0.122099	-0.0861468	-0.034428	0.0445139	0.0534027	-0.0127636	0.0363924	0.0362626	0.0349093	-0.101139	0.0299959	-0.02978	-0.00950879	0.0119076	-0.0112721	-0.0316363	0.0452554
174	1525	H	H3	H	H4	0	SC	LQD	0	0.0586005	-0.0701173	0.0685427	0.000410104	-0.0689672	-0.0138396	-0.0252761	0.00401474	0.000378426	0.0247631	-0.091395	0.00734541	0.0481939	0.0182066	0.0280924	0.0351309	0.0168327	0.0156182	-0.0229528	0.0402361
175	1459	H	H4	C	C1	1	SC	LQD	0	0.0616197	-0.109721	-0.0427306	-0.078119	0.054896	0.0151348	0.0304626	0.00162088	-0.0057979	-0.00274969	-0.057483	-0.00886738	0.0661743	0.047626	0.0178575	0.00201682	0.0460349	-0.0289309	0.0025773	-0.00658034
176	1542	C	C1	H	H4	1	IVC	SD	0	0.0473759	0.0592362	0.00669199	0.107542	-0.0434999	-0.0991779	-0.0360608	0.02005	-0.0179852	0.0253862	-0.00702185	-0.0625432	-0.0708305	0.0545966	-0.06735	0.0544753	-0.0137265	-0.00527998	-0.0465468	-0.0588467
177	1460	H	H4	H	H1	1	SC	LQD	0	0.0862557	-0.0988745	-0.00473692	-0.0446078	0.00556686	-0.0253936	-0.0237465	-0.0405494	-0.0139366	0.0244293	-0.113998	-0.011649	0.00855933	0.0162694	0.0038149	-0.0178333	-0.0406671	-0.00187685	0.0036708	0.0227881
178	1537	H	H1	H	H4	1	IVC	SD	0	0.0107123	0.00414904	-0.0784673	-0.0540087	-0.0587771	-0.0707745	-0.0040594	-0.0637337	-0.0842659	0.0338751	0.0203611	0.0120161	-0.132447	0.0386487	-0.00549442	0.0415418	-0.0308011	-0.0483486	0.0260237	0.0264559
180	1486	H	H2	H	H4	1	SC	SD	0	-0.0199573	0.148696	-0.00928596	-0.0748003	0.0409892	0.0135318	0.0414322	-0.058897	0.00983064	-0.0423148	0.13741	-0.0180375	-0.023658	0.0295331	-0.0249641	0.0585174	-0.00175267	-0.000881797	0.00639152	-0.0675426
181	1468	H	H2	C	C4	1	SC	SD	0	-0.0599692	0.161052	0.0882755	0.0324172	-0.0038625	0.0361357	0.0314098	-0.0195961	0.0505269	0.0117145	0.157886	-0.0176198	0.0496374	0.00349219	-0.007026	0.0580644	0.0278608	0.0157706	0.0274877	0.00429162
182	1606	C	C4	H	H2	1	IVC	LQD	0	0.0781177	-0.0835801	0.0550347	-0.00558016	0.020764	-0.00355556	0.0343509	0.0288188	0.0165824	-0.00556876	-0.137709	-0.00884587	-0.00334229	0.0279312	-0.0198714	-0.0122504	0.0194375	0.0217742	0.0248826	0.0163054
183	1477	H	H1	H	H4	0	IVC	LQD	0	0.105005	-0.0818977	0.0106553	-0.0230326	0.00656436	-0.0392054	0.0870313	0.0459552	0.00346367	-0.00200927	-0.09076	-0.0339957	0.00463922	-0.0194735	0.0140511	-0.0374198	0.0544089	-0.00711344	0.015548	-0.0014888
184	1504	H	H4	H	H1	0	SC	SD	1	-0.601993	-0.0772317	-0.11061	0.0497113	0.00113437	-0.00169028	0.102086	-0.0128099	0.0227502	0.00417233	0.152522	0.220592	0.0820562	-0.0438642	0.0135077	-0.0242171	-0.0504664	-0.0547081	-0.0446042	-0.0536759
188	1539	H	H1	H	H2	1	SC	LQD	0	0.109808	-0.10305	-0.0328117	-0.0565772	0.0579923	-0.041719	0.0425008	0.00883065	-0.0185225	-0.00108377	-0.120534	-0.0206893	-0.00569688	-0.0212446	0.0219115	0.0172572	0.00131233	0.00796031	-0.0132159	0.00347902
189	1514	C	C2	H	H3	0	IVC	SD	0	-0.044876	0.0829408	0.0809995	0.0181901	-0.0829376	0.0152129	-0.0459802	-0.0476707	-0.0236169	0.0358405	0.0497032	0.00663116	-0.0105065	0.031204	-0.00516757	0.0887304	-0.0499285	0.0126116	-0.0375646	0.000342557
190	1800	H	H3	C	C2	0	SC	SD	0	0.0337714	0.0605913	-0.0113874	-0.00278502	0.0356173	0.0111347	-0.0281354	-0.00340749	-0.0587116	-0.0522288	0.0926938	-0.168923	0.0705588	-0.0908603	0.0122775	-0.0204704	-0.0294205	-0.0502132	-0.0550395	0.0724909
195	1538	H	H1	C	C1	0	SC	SD	0	0.0452346	0.0410393	-0.0488988	-0.0243815	-0.0207732	-0.0719732	-0.0574109	-0.0500585	-0.028316	0.012721	0.0538896	0.0678773	-0.188932	0.0178874	0.0438796	0.00521823	0.00379574	-0.0310515	0.0791837	0.0480644
196	1544	C	C1	H	H1	0	IVC	LQD	0	0.106773	-0.0711096	-0.0661377	0.0349139	0.081719	-0.0526741	-0.0129518	0.0293585	0.0314275	0.0533264	-0.148701	0.00678252	-0.0368805	-0.06191	-0.0224078	0.00595577	0.00441512	-0.0315749	0.00201204	-0.00690388
197	1543	C	C1	H	H3	1	IVC	SD	0	0.061657	0.084707	-0.123825	-0.000443116	0.0143263	0.00390577	0.00541604	-0.00114499	3.73961e-05	0.0313051	0.118243	-0.0943299	-0.0426293	0.0152655	0.0140042	-0.0363756	0.0285701	0.0144997	-0.0452499	-0.0521424
198	1802	H	H3	C	C1	1	SC	SD	0	-0.0303738	0.125743	0.0259788	0.0370535	0.0509497	-0.0887863	-0.0743893	-0.00635616	0.00657236	0.0758066	0.058315	-0.0524275	-0.0832423	0.0524244	-0.0652065	0.0445557	-0.00628446	0.00254921	-0.0758668	-0.0493342
200	1711	C	C2	C	C1	1	IVC	SD	0	-0.0602013	0.0945835	0.116389	0.0415568	0.124137	0.0198376	0.00104983	-0.0848773	-0.0245032	-0.00184146	0.101417	0.0912024	-0.022206	-0.0206496	-0.0171947	0.0540926	-0.00338219	0.020159	0.0263248	-0.0124304
201	1565	C	C3	C	C2	1	IVC	SD	0	-0.0578327	0.142312	0.00337205	-0.0623753	0.0479466	0.0553909	0.00658814	-0.0700613	0.0235618	-0.0247169	0.174537	0.0499326	0.0191814	-0.0855503	0.0636666	-0.0156879	-0.00300937	0.0490016	0.00717146	-0.0451749
202	1570	C	C2	C	C3	1	SC	LQD	0	0.0603253	-0.0791486	0.062492	-0.011688	-0.0759516	0.064625	-0.015299	-0.0304623	0.0121892	0.0373556	-0.080514	-0.00681739	0.0486577	0.014384	0.0429023	0.0455001	-0.0141878	-0.0125183	-0.0442912	0.0411782
203	1567	C	C3	H	H4	0	IVC	SD	0	-0.0357876	0.0782392	-0.0188705	-0.0998725	0.0112748	0.0800637	-0.0026324	-0.016741	-0.0257004	0.0539707	0.120415	-0.120864	0.00248174	0.0571737	0.0756273	0.0087268	0.0425424	0.019347	0.018523	-0.0588182
204	1576	H	H4	C	C3	0	SC	SD	0	0.0500247	0.0368769	0.00200185	-0.0376369	0.0276676	-0.0704942	-0.0159073	-0.0278378	-0.00334945	0.00798767	-0.0275293	-0.0166397	-0.0715277	0.0426164	-0.0493847	-0.0555353	-0.000108571	-0.0159902	0.00981362	-0.00214179
205	1569	C	C2	H	H1	0	SC	LQD	0	0.0562972	-0.0740977	0.00263877	0.0071971	-0.0692994	0.0611543	-0.0433392	0.002255	-0.0437464	-0.00385251	-0.103824	0.0313095	0.0240589	0.00710806	0.026958	0.0198868	0.0461348	0.009264	-0.0308846	0.0296691
206	1710	H	H1	C	C2	0	IVC	SD	0	0.0493727	0.0692848	-0.12014	-0.0225755	0.0142918	-0.0175874	-0.00609675	0.00892558	-0.0341031	-0.0510782	0.0894283	-0.0699152	-0.112752	-0.0250648	0.0481837	0.000254971	0.032729	-0.0399029	-0.00634397	0.0109692
207	1571	C	C2	H	H4	0	IVC	LQD	0	0.0869818	-0.0602725	-0.004088	-0.0296688	0.0384785	0.0361785	-0.0150699	-0.0463903	0.00336514	0.00148407	-0.117739	0.0354442	0.00148804	-0.0430303	0.0408264	-0.0241134	-0.024677	0.00376595	0.00807994	-0.0187348
208	1580	H	H4	C	C2	0	SC	SD	0	0.0401943	0.0895731	-0.0636153	-0.0297506	0.00497188	-0.0355767	-0.00692675	-0.0191898	0.00680395	-0.0203553	0.0514236	0.00980657	-0.0852706	0.00948338	-0.0581798	0.0212862	-0.0284388	-0.0211318	0.011612	0.0108605
209	1573	C	C2	C	C4	0	IVC	SD	0	-0.00633966	0.0435024	0.056283	-0.0267471	-0.088796	-0.0196975	-0.0219773	-0.0291125	0.0363143	0.0530874	0.0240793	0.0485033	-0.0405502	-0.00499001	-0.0286615	0.00730081	-0.0374429	0.0265013	-0.0294485	0.0300519
210	1591	C	C4	C	C2	0	SC	SD	0	0.0148684	0.0743971	-0.00260057	-0.00742666	-0.0589387	0.0259557	0.0394069	-0.00936755	0.050393	0.0311328	0.116141	0.0986309	-0.123041	0.0458654	0.0960411	0.0840497	0.00351103	0.0194018	0.064324	0.0544889
211	1574	C	C2	C	C1	1	IVC	SD	0	-0.0322093	0.100373	0.111606	0.0963495	-0.0300277	-0.0357408	0.0159732	-0.0808871	-0.00727842	-0.0394759	0.0788709	0.0138219	-0.0741888	0.0320289	-0.0605308	0.0848921	-0.0350591	0.00718267	-0.0177236	0.00754216
212	1597	C	C1	C	C2	1	SC	LQD	0	0.0822169	-0.0550075	-0.0214067	0.0972214	0.0277775	0.0349326	-0.0390238	-0.0311366	-0.00840231	0.0727065	-0.117513	0.070484	0.0244421	-0.0446377	0.0146947	0.0215965	0.070304	0.00187857	0.0089577	-0.0120247
214	1708	H	H1	H	H4	1	SC	SD	0	0.0712949	0.044543	-0.0665805	0.0120675	0.0381282	-0.0490321	-0.0128343	-0.00267702	-0.0285619	-0.0269466	0.0190182	-0.109992	-0.0172256	-0.0593582	0.00400447	0.00392686	0.0212675	-0.0258728	-0.0451676	-0.00999294
216	1590	C	C1	H	H4	1	SC	SD	0	0.0576051	0.102768	-0.0625826	-0.0393214	0.0265838	0.0159179	-0.0523423	0.00963026	0.0420551	0.0738514	0.0614712	-0.111614	0.0139506	0.0231418	0.00509379	-0.0383394	0.0327904	0.061317	-0.0306763	-0.0380907
217	1578	H	H4	H	H3	1	IVC	SD	1	-0.562192	-0.0698241	-0.0289207	0.124359	0.0175348	-0.0893749	0.0747226	-0.103405	0.0390029	0.0364387	0.158455	0.231734	-0.0205505	-0.0303798	-0.0102931	0.024945	-0.0104804	-0.0209041	-0.0270567	-0.0641251
218	1804	H	H3	H	H4	1	SC	SD	0	0.0549187	0.082269	0.0188275	0.0538595	-0.00140068	0.012713	0.0348016	0.0297132	0.0216845	-0.0207306	0.0615816	-0.0193316	0.0303778	-0.109403	0.0208921	0.0400565	-0.00511861	0.0335123	0.0233721	0.00406692
220	1729	C	C4	H	H4	1	SC	LQD	0	0.0651617	-0.0341012	0.0342142	-0.0133968	0.0571974	0.0182494	-0.0306914	-0.0297577	-0.0444314	-0.031887	-0.0691586	0.0308975	0.0284903	0.0506629	-0.0124355	-0.00135217	-0.0144317	0.0523553	0.0204445	0.0298801
221	1581	C	C4	C	C2	1	IVC	SD	1	-0.566665	-0.0366799	-0.0752649	0.0250644	0.00123933	0.0253134	-0.0756756	-0.0380377	0.0523164	-0.0694064	0.107087	0.218918	0.0027146	-0.0030939	-0.0280313	-0.0456975	-0.00930108	-0.0144275	0.0019453	-0.0555527
222	1649	C	C2	C	C4	1	SC	LQD	0	-0.0460303	0.00852822	0.174472	0.0130761	0.0269889	0.0532707	0.0186365	-0.0425802	0.00985685	0.0136938	-0.0352174	-0.00628858	0.0812152	-0.0102946	0.0179482	0.0617749	0.00117757	0.0214102	0.0273319	0.00749304
223	1582	C	C4	H	H1	0	IVC	SD	1	-0.583533	-0.0560458	-0.0888754	0.00661832	0.0391354	-0.00326593	0.00481318	0.0145856	-0.0254965	-0.038148	0.118574	0.1779	0.0572933	0.0583723	-0.0233402	-0.0987961	-0.0578159	-0.075953	0.0165367	-0.0293598
224	1780	H	H1	C	C4	0	SC	SD	0	0.0411394	-0.0154929	0.0213701	-0.039567	0.0818267	-0.111053	-0.0441289	-0.00132831	-0.0414274	-0.0245663	0.0608863	-0.210673	0.0762327	-0.041746	-0.0996961	-0.0574548	-0.0428368	-0.0811566	0.0390621	-0.0123
225	1583	C	C4	H	H3	0	IVC	LQD	1	-0.570824	-0.11195	-0.036489	0.0344695	0.0381825	0.0483233	0.0191675	-0.0314176	-0.0178408	0.046043	0.09329	0.25204	0.0358322	-0.0144709	0.0351306	-0.027314	-0.0179636	0.00205646	-0.0585778	-0.0518265
226	1790	H	H3	C	C4	0	SC	LQD	0	-0.0321079	0.00157314	0.0968437	-0.0644133	0.00624352	0.0493288	-0.0183101	0.0259133	0.00708637	-0.0305918	-0.0413942	0.0153078	0.0512928	0.0145824	0.0471215	0.0210424	-0.0732279	0.0319332	-0.00497074	0.0113955
227	1585	C	C4	H	H4	1	SC	SD	1	-0.570946	-0.0755067	-0.0550614	0.0233439	0.0321451	0.029529	-0.0988818	0.0246721	0.0460114	-0.0234129	0.0968194	0.225122	0.0714551	-0.0122264	-0.00605373	-0.0401709	0.021064	-0.000332517	-0.00824851	-0.0449269
228	1756	H	H4	C	C4	1	IVC	SD	0	0.0163712	0.0732851	0.0182041	-0.0149095	-0.0299651	-0.0309162	0.0307043	0.0229933	-0.0182635	-0.0256535	0.0863926	0.0167221	-0.0220661	-0.0309663	-0.00844194	0.00699532	-0.00532492	0.0469427	0.0163791	-8.75612e-06
229	1586	C	C1	H	H3	0	IVC	SD	0	0.0437973	0.104959	-0.0894753	0.0164627	0.0201107	0.0220203	-0.0164474	-0.0140373	0.00810915	0.0343818	0.109239	-0.0043763	0.0121915	-0.0944468	0.0300171	-0.00847814	0.00212536	0.0562451	0.000827124	0.00724943
231	1587	C	C1	C	C4	0	IVC	SD	0	0.0250121	0.148515	-0.0937628	0.0289147	0.0239055	0.0579119	-0.0305062	-0.0144251	0.000643519	-0.0104983	0.0874544	-0.069907	0.0314419	-0.00897669	0.011706	0.0128565	0.0219564	0.0638969	-0.0184993	0.00313304
232	1733	C	C4	C	C1	0	SC	SD	0	0.0467796	0.0720616	-0.0348678	-0.0369545	0.0363653	0.00685839	-0.0500843	0.00662894	0.011567	0.0283348	0.0315202	-0.0909611	0.024214	-0.00502292	-0.0121032	0.0173148	0.00383666	0.0020853	0.00984659	-0.0292345
233	1588	C	C1	C	C3	0	SC	SD	0	0.0585286	0.0974295	-0.101749	0.0278805	0.0301657	0.0258751	-0.0219239	-0.0027202	0.0053874	0.0493591	0.117199	-0.140132	-0.0784888	0.039756	0.1279	0.00379349	0.0681021	0.0165896	0.0198417	-0.0333359
234	1816	C	C3	C	C1	0	IVC	LQD	0	0.104488	-0.0671487	-0.0344479	-0.0131893	0.0766909	0.0321456	0.0101538	0.028048	-0.00891718	0.0277071	-0.0891826	-0.0172567	0.0510024	-0.0177175	0.0368045	0.0311168	-0.000770728	0.0152537	0.0125146	0.00732869
235	1589	C	C1	H	H1	0	IVC	SD	0	0.0703477	0.0854265	-0.090284	0.0120285	0.0392224	-0.0167666	-0.00839911	0.0175462	0.0228258	0.0307785	0.0650097	-0.0633732	0.0307484	-0.0166292	0.0049529	0.0139056	0.0391453	0.0628717	0.000723934	0.0238426
236	1777	H	H1	C	C1	0	SC	LQD	0	0.0830073	-0.129629	-0.0426172	-0.0209093	-0.0188325	-0.0585377	-0.0492003	-0.0524447	-0.0437144	-0.0186627	-0.13654	0.0414466	-0.0541037	-0.0436443	-0.00476409	-0.00691636	-0.0279707	-0.0144474	-0.0368684	-0.0104652
237	1592	C	C4	H	H4	0	IVC	SD	0	0.050277	0.0524108	-0.0254577	-0.0304051	-0.0387648	-0.0279466	0.0851907	0.0364547	-0.00857502	0.0455655	0.0782847	-0.0151231	-0.088118	-0.00558542	0.00229412	0.0438087	0.0226733	-0.00629457	0.0102567	0.0266606
238	1664	H	H4	C	C4	0	SC	LQD	0	0.0971251	-0.118894	-0.0491026	-0.0201503	-0.00738345	-0.00892981	0.0627677	0.042011	0.00952272	-0.0168847	-0.127825	0.00689612	-0.0169951	0.0347723	-0.0028126	-0.0296301	0.0415314	-0.00405836	0.00298507	0.0281206
239	1593	C	C4	H	H3	0	SC	LQD	0	0.0963392	-0.0663078	0.0395487	-0.0100285	-0.0163828	0.074827	0.0864694	0.0287115	0.0207613	0.057502	-0.0998323	0.0368226	0.0403258	-0.0112393	0.0463582	0.0344455	0.052964	-0.00521206	-0.0208278	0.0159153
240	1787	H	H3	C	C4	0	IVC	SD	0	0.0295424	0.127657	-0.013349	0.0403576	-0.0572526	0.0206898	0.0437911	0.0275484	-0.00653796	-0.035539	0.047881	-0.0683796	-0.0567123	0.0115298	-0.00678698	-0.0203745	-0.0177168	0.0168761	-0.0580651	-0.0166107
241	1594	C	C4	H	H1	1	IVC	SD	0	-0.0122473	0.0432066	0.0114293	-0.0278462	-0.0878089	-0.0670875	-0.0255392	0.00411916	0.0475902	0.0567455	0.0353481	0.0507113	-0.098801	-0.0129921	-0.0567052	-0.0207669	-0.0304828	0.0239613	-0.0118071	0.0364874
242	1707	H	H1	C	C4	1	SC	LQD	0	0.110527	-0.139321	-0.0478574	-0.0242053	-0.00288672	-0.0268682	-0.0230539	-0.0823548	-0.0192287	0.0212349	-0.131675	-0.0261553	-0.0150025	0.0357859	0.00975258	-0.0286213	-0.0488379	0.00710037	-0.00397745	0.00749152
244	1761	C	C3	C	C4	0	IVC	LQD	0	0.0241174	-0.0550197	0.100311	-0.0416943	-0.0469658	-0.0100035	-0.00960906	-0.0284252	0.055029	0.0640263	-0.0986184	-0.0304551	-0.0211277	0.0321063	-0.0531608	0.0115289	-0.0347579	-0.0316555	0.0280977	-0.0126596
245	1596	C	C1	C	C4	0	SC	SD	0	0.0105878	0.0763095	-0.0152301	-0.0316834	-0.0350052	-0.0191907	0.0202104	0.0534163	0.0936937	0.0605017	0.114751	0.0644536	-0.13088	-0.0604245	0.117938	0.0517785	0.0228682	0.00574684	0.0503507	0.00167637
246	1605	C	C4	C	C1	0	IVC	SD	0	0.0386952	0.0802474	-0.0363543	-0.0130583	-0.0565447	0.0431533	0.035958	0.0173378	0.0593879	0.0320646	0.182321	-0.132998	0.0919678	-0.0222477	-0.0183609	-0.0272476	0.00169258	0.0242608	-0.0314696	0.0430597
247	1598	C	C3	H	H4	1	SC	LQD	0	-0.027695	-0.0168425	0.124845	-0.0823815	-0.0574368	0.0427959	0.0198743	-0.0103788	-0.022008	0.081146	-0.0608744	-0.00349161	0.0724914	0.0459448	0.0321019	0.0529069	0.0277618	0.0221647	-0.0364625	0.0340672
248	1637	H	H4	C	C3	1	IVC	SD	0	-0.0444552	0.127779	0.0734044	0.0567878	-0.0668536	-0.0369712	-0.0260377	-0.0249856	0.0125854	0.00435182	0.0403466	0.0440943	-0.0573547	0.0375685	-0.113725	0.0674333	0.0595105	0.0104429	0.0162109	0.0461105
251	1602	C	C3	H	H1	1	IVC	SD	0	0.0164396	0.133948	0.0118329	0.094473	-0.00200299	0.00558381	0.00202487	-0.0689243	-0.0591412	-0.0679726	0.0954421	0.0959871	-0.0818803	-0.0260773	-0.0241412	-0.0231194	-0.0154077	0.098786	-0.0723133	-0.00715688
252	1779	H	H1	C	C3	1	SC	LQD	0	0.107517	-0.137117	0.0193694	0.037079	-0.026473	-0.115616	-0.00712761	0.01133	-0.0217455	-0.0364318	-0.17812	-0.00243542	-0.0713147	-0.000968252	-0.0477907	-0.0280462	-0.0264728	-0.015492	0.0167216	0.0217059
253	1604	C	C4	H	H1	0	IVC	LQD	0	0.0722872	-0.0820946	-0.000546451	-0.028761	-0.0164935	0.0659544	0.0192693	-0.0180897	0.0280351	-0.00708904	-0.0565558	0.00861106	-0.0064604	0.0133761	0.0184342	-0.0283239	0.00786904	0.0322102	-0.0088182	0.0244971
254	1911	H	H1	C	C4	0	SC	SD	1	-0.40044	-0.0479582	0.0432236	-0.079947	-0.056099	0.0183472	-0.0124884	0.0512976	-0.0315578	-0.0710119	0.109705	0.151663	0.125394	-0.00299228	0.0181646	-0.00656658	0.00562964	-0.0354425	-0.0234304	0.0462084
258	1781	H	H1	H	H4	1	SC	SD	0	0.0120408	0.0895731	-0.0461561	-0.0205723	-0.0223994	-0.116133	-0.0712629	0.00424954	-0.0325234	0.0369684	0.0404064	-0.0106777	-0.168757	0.0400244	-0.0219073	0.0778394	-0.0228429	-0.0644168	0.021081	0.0123717
260	1929	C	C4	H	H4	1	SC	LQD	1	-0.468145	-0.0905338	0.00875117	-0.0120948	-0.0388486	0.0490138	-0.127588	0.0533468	0.00269645	-0.00588675	0.0656417	0.139434	0.142749	0.0308477	0.0198411	-0.0409563	0.024294	-0.060115	-0.00657499	0.0702996
262	1645	C	C2	H	H4	1	SC	SD	0	0.0134582	0.0631878	0.0126255	0.0379707	-0.0949145	0.0114862	-0.0312635	-0.0147057	-0.0191155	0.0226693	0.0386745	0.0701231	-0.0456784	-0.00552626	-0.0253031	0.00113677	0.0223192	0.0604091	-0.0384409	0.0523266
263	1644	C	C2	H	H3	0	SC	LQD	0	0.00114548	-0.0201925	0.0814128	0.0456469	-0.064683	0.0954805	-0.0255836	-0.0710225	-0.0230586	0.0133626	-0.040588	0.0384046	0.0461265	0.00622011	-0.0100883	0.0199539	-0.0446579	0.057828	0.0248227	0.036942
264	1775	H	H3	C	C2	0	IVC	SD	0	-0.0343542	0.107044	0.083615	0.0979553	-0.0458832	-0.028299	0.01836	-0.0777867	0.00620544	-0.0165175	0.0610765	0.0635242	-0.0661324	-0.0253428	-0.0502062	0.0733989	-0.0125925	0.0234616	0.00862741	0.0176993
265	1647	C	C2	C	C3	1	SC	SD	0	0.00549664	0.086126	0.0734585	0.112794	-0.076536	0.0598872	0.0160433	-0.0592537	0.00496418	0.0433687	0.0424475	0.0758746	-0.00226966	-0.0463526	-0.00831686	0.083304	-0.0405589	0.0658667	-0.0240647	0.000140896
266	1765	C	C3	C	C2	1	IVC	LQD	0	0.0779079	-0.0016065	-0.0115282	0.0237919	0.0564942	0.0936433	-0.0238052	-0.0160276	0.0409081	0.0071978	-0.0296209	-0.0265794	0.0420029	0.0527508	0.0048529	-0.0101945	-0.0067778	-0.0163495	-0.00550511	-0.0176628
268	1659	H	H2	C	C2	1	SC	LQD	0	-0.00872368	-0.00997591	0.0509635	-0.0307064	0.0799288	0.0622694	-0.035196	-0.0533884	0.0444128	0.0092384	-0.00705653	-0.00577848	0.0899022	0.0652523	0.0213166	-0.0029827	0.00650059	0.0111626	0.0278082	-0.0229356
269	1651	C	C2	H	H1	0	IVC	SD	0	-0.0168228	0.0506486	0.0989638	-0.0357229	-0.0878817	-0.077295	-0.0440574	-0.0307887	-0.00473132	0.0436405	0.00790356	0.0498155	-0.086692	-0.009962	-0.0535814	0.0130328	-0.0506234	-0.00239768	0.00728345	0.0345071
270	1783	H	H1	C	C2	0	SC	LQD	0	0.0927218	-0.0658504	-0.0378062	-0.0228866	0.0520818	0.00301856	-0.0158139	-0.0322735	-0.00126063	-0.0232347	-0.124048	-0.0351221	-0.00908653	0.00792364	0.000732177	-0.00506789	-0.0377131	0.00240076	0.0102787	-0.00465399
272	1759	C	C3	H	H2	1	SC	LQD	0	0.0774585	-0.0713348	-0.0330547	0.0146591	-0.0123285	0.0493596	0.0321305	-0.00209633	0.0463322	-0.00218295	-0.053101	-0.0337483	-0.0166162	0.0669138	-0.015893	-0.06929	-0.0146826	0.0338249	0.00730913	-0.0218505
273	1661	H	H2	H	H1	1	SC	LQD	0	0.0820003	-0.0718541	-0.00113035	0.0759151	-0.0301598	0.047165	-0.0299047	-0.00362494	-0.00347679	-0.0314725	-0.0596491	-0.0286008	-0.018558	0.0592355	-0.0499307	0.005517	-0.0399271	0.0179184	0.0236949	-0.0350344
274	1709	H	H1	H	H2	1	IVC	SD	0	0.0387643	0.0726105	-0.135892	-0.0415831	0.00133298	-0.0139994	-0.027747	0.00958138	-0.033186	-0.0395166	0.107924	-0.0424943	-0.130795	0.0841863	0.0686213	-0.0335859	0.00204004	0.00529841	-0.0039183	-0.00685816
275	1662	H	H2	H	H3	0	SC	SD	0	-0.0232198	0.108944	0.0403731	-0.0224643	-0.020804	-0.024222	-0.0304533	0.0179753	0.0626086	0.0247412	0.0449583	0.0748448	-0.029657	0.0201545	-0.0338551	0.00596743	-0.00675655	0.0391985	0.0343582	0.0274733
276	1791	H	H3	H	H2	0	IVC	SD	0	-0.165829	0.0592422	0.174154	-0.0259228	-0.0678303	-0.058729	-0.0442697	-0.0471937	-0.00532865	0.0177224	0.00284633	0.101638	-0.041325	-0.0133652	-0.0726139	0.0086904	-0.0613049	0.00440779	0.0075824	-0.000771982
277	1663	H	H2	C	C3	0	SC	LQD	0	0.113819	-0.0741427	-0.0305261	0.0351951	0.00821705	0.0537614	0.0145461	0.0581504	0.0244955	0.0140944	-0.0624387	-0.0714285	0.0405479	0.0510358	0.0195644	0.00199266	-0.0125239	0.0315665	-0.00646368	-0.0427836
278	1767	C	C3	H	H2	0	IVC	LQD	0	0.0630305	-0.0258961	-0.0503704	0.0543241	-0.0855947	0.0750166	-0.0403617	0.00314635	0.0260106	0.0523229	0.00379547	0.0218742	0.0449199	0.0293892	0.0430748	0.00336876	-0.0277611	0.00501174	-0.0131892	0.0198632
279	1668	H	H4	C	C3	0	IVC	LQD	0	0.0876493	-0.0888311	-0.011661	-0.0241323	0.0208542	-0.0424473	0.0750004	0.0843063	-0.0147092	-0.0166938	-0.108558	0.0322975	-0.0338123	-0.000352309	-0.0296718	-0.0187462	0.043852	-0.0104221	0.0158614	0.0235385
280	1815	C	C3	H	H4	0	SC	SD	0	-0.0808626	0.131325	0.122902	-0.0194486	0.0284455	0.00468088	0.0899395	0.0284854	0.0236546	0.0541988	0.0858889	0.0484702	-0.00505089	-0.0614277	-0.028222	0.0645439	0.00387589	0.0385353	0.0300925	-0.00848273
281	1706	H	H1	C	C3	0	IVC	SD	0	0.0709804	0.0410757	-0.0992318	-0.0472574	0.0113534	-0.0675156	0.0262757	-0.0354168	0.0141977	-0.0175992	0.048098	-0.0689418	-0.0905671	-0.00478705	0.0414284	-0.0300982	0.0375461	-0.0370583	-0.00253715	-0.00239741
282	1766	C	C3	H	H1	0	SC	LQD	0	0.0146571	-0.0455581	-0.00280541	-0.033974	-0.0955714	0.0186891	-0.0172017	-0.0453119	0.0364828	0.0390603	-0.0662018	0.0525087	0.0100218	0.000630061	0.0125996	-0.0399997	-0.0417919	-0.0363756	0.0262365	0.0141482
283	1712	C	C2	H	H2	0	IVC	LQD	1	-0.563506	-0.0878602	-0.0374558	0.0969222	0.0366729	-0.0771666	0.15003	-0.0772458	0.0343859	0.0852576	0.134207	0.114623	0.147461	0.111821	-0.0036825	-0.0414493	0.0426192	-0.0824557	-0.0293921	0.023937
284	1864	H	H2	C	C2	0	SC	SD	0	-0.0254469	0.0455315	0.114199	0.00306788	-0.00404143	0.00413917	0.0286221	0.0241866	0.015539	-0.00672036	0.0533249	-0.110716	0.100545	-0.0367789	-0.0716363	-0.0195507	0.0789398	-0.0642292	0.0539197	0.037968
285	1713	C	C2	C	C4	1	IVC	LQD	0	0.0922938	-0.0647653	0.00157915	-0.0109286	0.0704984	0.0126714	-0.0368045	0.0151405	0.0231125	-0.00686928	-0.0978108	-0.0151354	0.0372779	0.0118202	0.0243144	0.0164012	0.0403253	-0.00332687	-0.00298077	0.00837061
286	1732	C	C4	C	C2	1	SC	SD	0	0.0348565	0.107613	-0.00525102	-0.0250141	0.0344827	0.00328158	-0.0440876	-0.00222632	0.0126333	-0.0164887	0.0636927	-0.0797973	-0.0312414	-0.0708996	-0.0506341	-0.0637945	0.0178238	-0.0461524	0.0233551	0.0251347
287	1715	C	C2	H	H4	0	IVC	SD	0	-0.0205848	0.145629	0.0811004	0.0358182	0.0174648	0.059272	0.0501845	-0.0123379	0.0725762	-0.0135623	0.178802	-0.077184	0.050943	-0.0385789	-0.0246205	0.0552388	-0.0238519	-0.00234628	0.0209317	0.0265074
288	1755	H	H4	C	C2	0	SC	LQD	0	0.0906404	-0.0809998	0.0319917	-0.00223599	-0.00717984	-0.00661287	0.0227897	-0.00581808	0.0501009	0.00200631	-0.10612	-0.0185265	-0.00788797	0.00354287	0.00349693	-0.0108345	-0.0261343	-0.018426	0.0148194	0.00884363
289	1717	C	C2	H	H1	0	IVC	LQD	0	0.108349	-0.0367848	-0.047139	0.0195614	0.0494353	0.0525274	-0.01172	-0.00741752	0.0528095	0.050424	-0.087855	0.00424084	0.0517324	-0.0400529	0.0510774	0.0217356	0.0203498	-0.00978776	0.0114961	-0.00123267
290	1945	H	H1	C	C2	0	SC	SD	0	0.0872948	-0.00156093	-0.0837306	0.0201521	-0.0344854	-0.0717452	-0.0343399	-0.0551312	0.01435	0.0410813	-0.0937174	-0.0306711	-0.0510528	-0.0411214	-0.0127258	0.0766558	0.00513834	-0.0332455	-0.0731276	0.0128711
291	1718	C	C2	C	C3	0	SC	LQD	0	0.0681544	-0.0595246	0.0345525	0.0203673	-0.00807926	0.0210219	0.0174633	0.00972679	0.0378587	0.0104147	-0.0623504	0.0235734	0.0637739	0.000361654	0.0408659	0.00539858	0.00637115	-0.00841133	0.0140826	0.0107095
292	1758	C	C3	C	C2	0	IVC	SD	0	0.0444511	0.122947	-0.0369718	0.0884394	-0.0106475	0.0515205	0.0300836	0.0104336	0.0618374	0.0115956	0.0810252	-0.0428468	0.00824645	0.0123833	0.0344614	0.0176946	0.0108495	0.0496958	-0.00169691	-0.00467929
293	1725	C	C1	H	H1	1	IVC	LQD	0	0.0856291	-0.060747	-0.0155712	0.129082	0.0263402	-0.0630589	0.0154119	0.0817881	-0.0365069	0.0656653	-0.179356	0.0533967	-0.0493324	-0.0919146	-0.0473447	-0.0220193	0.048636	-0.00254828	0.0311381	-0.0540547
294	1910	H	H1	C	C1	1	SC	SD	0	0.0933559	0.0153428	-0.0612736	-0.0173173	-0.0282397	-0.0543709	0.0142396	0.064345	0.0307114	-0.0196954	0.000598154	-0.0865376	-0.100506	0.00629261	0.0125728	0.0356186	0.00156472	-0.0441653	-0.00742316	-0.0474421
297	1727	C	C1	H	H3	0	IVC	LQD	0	0.135314	-0.0918187	-0.0105225	0.0673257	0.0518067	-0.0408577	0.0654755	0.105527	-0.0129465	0.0655373	-0.157259	0.00753163	-0.0153519	-0.0919308	-0.00443195	0.0113769	0.012625	-0.00521106	0.0095707	-0.0420863
302	1763	C	C3	H	H4	1	SC	SD	0	-0.0275778	0.192236	0.00233814	-0.00701331	0.0446641	0.046274	0.00232984	-0.0330936	0.0602621	0.0282719	0.258961	-0.163714	-1.6248e-06	0.010802	0.0688269	-0.00849587	0.0283475	-0.00658023	0.0259488	0.0146808
303	1760	C	C3	H	H3	0	IVC	SD	0	0.0253143	0.154442	-0.0279915	0.0577281	-0.0271599	0.0498708	0.032625	0.0163636	0.0528057	0.0032484	0.0918466	-0.10459	0.0762873	0.010324	0.0160237	0.0482301	-0.0076642	0.0590351	-0.00842304	-0.0316661
304	1784	H	H3	C	C3	0	SC	SD	0	0.0139033	0.125173	0.0025555	0.0303992	-0.032246	0.0284267	0.0387785	0.0186666	0.0206686	-0.0372512	0.0631346	0.020804	-0.0831343	-0.0128218	-0.0240842	-0.0636058	-0.0211526	0.0464044	-0.0105415	0.0214379
305	1762	C	C3	H	H4	1	IVC	SD	0	-0.00948407	0.152274	-0.0717511	-0.044826	0.0386039	0.0626899	0.012624	0.00495575	-0.0204013	0.0605785	0.126299	0.0157513	-0.0819106	-0.00242518	0.100763	0.0442969	-0.0301685	0.0229249	0.0220616	0.0113159
306	1796	H	H4	C	C3	1	SC	SD	0	0.00141315	0.107501	0.0062929	0.0639841	0.000336327	-0.0142259	-0.0516293	-0.0796988	-0.0453328	-0.0601319	0.0402249	0.0132184	-0.0922139	0.0223007	-0.0988623	0.0864893	-0.0432498	-0.0255253	-0.0137363	0.0235794
307	1773	H	H3	H	H1	0	IVC	LQD	0	0.0756653	-0.107332	-0.0157448	0.0445172	-0.0729988	-0.0515219	-0.015821	0.0232263	0.009588	0.0183509	-0.120035	-0.0163829	-0.0503948	0.0205802	-0.0470543	0.000716105	-0.0126391	-0.000282702	0.00162541	0.0309807
308	1778	H	H1	H	H3	0	SC	SD	0	0.0653645	0.0581848	-0.0781357	-0.0163221	0.0163961	-0.0735492	-0.0162195	0.00920133	-0.017875	-0.0140461	0.100733	-0.202534	0.0821687	-0.0413961	-0.0488217	-0.00533601	0.00527412	-0.0194511	-0.0147173	0.00887336
309	1776	H	H3	H	H4	1	SC	LQD	0	-0.000519342	-0.119903	0.0565632	-0.050552	-0.0280866	0.0578242	0.0874658	-0.0126516	-0.0872156	-0.0242736	-0.0533156	-0.0232591	0.0834618	0.0754814	0.0381017	0.0198159	-0.0835472	0.0230157	-0.0267428	0.00204067
310	1795	H	H4	H	H3	1	IVC	LQD	0	0.102886	-0.0820626	0.00974207	0.090658	0.056123	-0.0586241	-0.0636365	-0.0101646	-0.0321595	-0.00471263	-0.153417	-0.0106849	-0.0175914	-0.0330468	-0.0384321	0.0107315	-0.0208144	-0.033158	0.0254145	0.00341497
311	1798	H	H4	C	C1	1	SC	LQD	0	0.087625	-0.0425735	-0.0108404	0.037516	0.0731213	0.0304551	-0.0295376	0.00630109	-0.0335699	-0.00753238	-0.118454	0.0188923	0.00429443	-0.0581029	0.0259105	0.0461305	0.0270714	0.0108938	-0.0273334	-0.00117867
312	1979	C	C1	H	H4	1	IVC	LQD	0	0.0594375	-0.0161915	0.00770695	0.0592756	-0.0618845	0.0131656	-0.0506369	0.0311104	-0.0153883	0.0200134	-0.0673454	0.0312825	-0.0156568	0.0108744	-0.0363952	-0.0199804	0.0236004	-0.00473676	0.0403637	0.0234662
313	1801	H	H3	C	C3	0	IVC	SD	1	-0.582528	-0.0841076	-0.067608	0.0727354	0.0513514	-0.0708243	0.0908725	-0.000989613	-0.0634601	0.0808983	0.155661	0.197105	0.0518199	-0.0310454	0.00288746	-0.0110592	-0.0173401	-0.0214783	-0.0162676	-0.0261653
314	1818	C	C3	H	H3	0	SC	SD	1	-0.576769	-0.0793272	-0.0722151	0.101188	0.0419196	-0.0521003	0.148088	-0.112615	-0.0903168	0.0603222	0.12862	0.168318	0.0874466	0.0442195	0.000914525	-0.000561762	0.0448972	-0.0667353	-0.0357843	-0.0136939
315	1803	H	H3	H	H2	0	SC	LQD	0	0.0682652	-0.0465973	-0.00738013	-0.00229414	0.056454	0.0521842	-0.0153602	-0.0488101	-0.0265645	-0.00364769	-0.0615099	0.0648766	0.0554221	-0.0328643	0.0630732	0.0405345	-0.0156043	0.0326708	-0.0372593	0.0194276
316	1861	H	H2	H	H3	0	IVC	LQD	0	0.00495204	-0.0744969	0.0888653	0.00880566	-0.0811164	0.0673272	-0.0310977	-0.0474279	-0.0542825	0.0225806	-0.0491773	0.0507622	0.0739822	0.0326395	0.0204495	0.0109966	0.00824105	0.0103585	0.0154123	0.0322959
317	1805	H	H3	C	C4	0	IVC	LQD	0	0.0514635	-0.0346137	0.0176211	-0.0135792	-0.0307393	0.0629023	0.0419111	0.0207511	0.0545779	-0.0126874	-0.105154	0.0237499	0.019113	-0.0730733	0.0530351	0.042043	-0.008898	0.00406566	-0.0412082	-0.0112183
318	1930	C	C4	H	H3	0	SC	SD	1	-0.502566	-0.0522691	-0.0296406	-0.0347099	-0.048863	0.0486902	-0.040555	0.0363107	-0.0221238	-0.0189292	0.100244	0.18972	0.0525377	-0.0189064	-0.00668319	-0.0197211	-0.0107164	-0.0206811	-0.0127931	-0.0533922
319	1808	H	H4	C	C4	1	SC	SD	0	0.030714	0.118702	-0.0564624	-0.0407385	0.0381328	-0.0837138	0.085813	0.0113574	-0.0235218	0.0169147	0.0990536	-0.0262028	-0.0972504	-0.0538807	0.0176872	0.0436095	0.038488	-0.0494978	0.0144277	0.0260597
320	2062	C	C4	H	H4	1	IVC	SD	0	0.0311634	0.0928856	-0.0267924	-0.032593	0.0219564	-0.0412686	-0.0218089	0.00294376	0.0172495	0.0218723	0.0839697	-0.0174959	-0.0283642	-0.0235686	0.000551347	-0.0149266	0.00448155	-0.00248025	-0.00664916	0.00287677
321	1809	H	H4	H	H1	0	IVC	SD	0	0.0452133	0.0660421	-0.113456	0.0140537	-0.107711	-0.020772	0.0632059	0.00312096	-0.0417139	0.044678	-0.00100815	0.0266984	-0.129854	0.0103766	0.00701274	-0.0178547	0.110956	-0.0456586	-0.0799152	0.0657299
322	1914	H	H1	H	H4	0	SC	LQD	1	-0.336429	-0.0241365	0.0855006	-0.0843496	-0.0504198	0.0446666	-0.0660008	0.0673187	0.0602497	-0.0547093	0.0422998	0.0513661	0.14044	0.0807931	0.0206318	0.00709889	-0.0105438	-0.0319527	-0.0199582	0.0401326
323	1810	H	H4	C	C2	1	SC	LQD	0	0.122096	-0.0721455	-0.0523969	0.0228892	0.00912128	0.00694907	0.0692493	0.0946184	0.0144732	0.0439886	-0.103027	-0.00441167	0.00158619	-0.030193	0.018132	0.0234756	0.0810898	-0.00370382	-0.0210094	0.0173423
324	2071	C	C2	H	H4	1	IVC	SD	0	-0.00540512	0.144261	0.0784261	0.0224039	0.0285356	-0.014282	0.00306869	0.0715713	0.038504	-0.00407445	0.0673527	-0.0343921	-0.0305423	0.0338154	-0.0480412	0.0794623	-0.00641583	0.0114218	0.00376196	-0.0440073
325	1811	H	H4	C	C3	0	SC	LQD	0	0.0949091	-0.084721	-0.0346704	0.0396814	-0.0587762	0.00226908	0.0737511	0.00755781	0.0106576	0.0518179	-0.148478	0.0374523	-0.0255493	-0.0149622	0.0112474	0.0327674	0.0815182	-0.0269217	-0.0689199	0.0477756
326	1984	C	C3	H	H4	0	IVC	LQD	0	0.0759502	-0.0471657	0.0137025	0.0864912	-0.0514358	0.0252387	0.011239	-0.0482303	0.0668266	0.00810057	-0.0483563	-0.005097	0.0521961	0.0872616	-0.0033588	-0.00378155	-0.033772	0.0377887	0.0137871	-0.00606621
327	1812	H	H4	H	H2	0	SC	SD	0	0.0179664	0.042786	-0.0694745	-0.0632223	-0.11474	-0.0448374	0.0690162	-0.00215409	0.0335703	0.0669368	0.000488035	0.0239902	-0.164475	-0.00831248	0.0456091	0.0492767	0.0904696	-0.0770083	-0.0597582	0.0574834
328	1862	H	H2	H	H4	0	IVC	SD	0	0.01672	0.142206	-0.0980842	-0.0566835	-0.00032981	0.00545094	-0.0257555	-0.028797	0.0204733	0.00746671	0.1137	-0.0504838	-0.0934728	0.0717559	0.0135617	-0.101937	0.00215251	0.0301878	0.0378233	-0.0482178
329	1813	C	C3	H	H2	1	SC	SD	1	-0.507242	-0.0334186	-0.0658424	0.0588229	0.0907983	-0.0740482	0.17313	-0.0166949	-0.0347358	-0.0738811	0.135528	0.241607	-0.00874208	-0.00853417	-0.00315251	0.00089887	0.0802526	0.00856528	-0.040673	-0.0595155
330	1892	H	H2	C	C3	1	IVC	SD	0	-0.100491	0.111623	0.136303	-0.0564094	0.0271066	-0.0577939	0.0159427	0.0457663	0.0721959	-0.0665178	0.16664	-0.15009	0.0412287	-0.0353617	-0.0937425	0.0336085	-0.00547185	-0.0600744	-0.00874873	-0.0229056
331	1814	C	C3	H	H1	1	SC	LQD	0	0.0719141	-0.0599023	-0.0154346	0.0496306	0.0400412	0.00102169	-0.0787063	-0.0263732	-0.0607727	0.00376205	-0.0755771	0.00352025	-0.00946744	0.0156481	-0.0433581	0.0475084	0.0160948	-0.00568163	0.0161283	0.0198422
332	1890	H	H1	C	C3	1	IVC	LQD	0	0.122412	-0.11026	-0.00213239	0.00650347	0.0138475	-0.0676706	0.0214936	0.0478025	0.0239749	-0.0511959	-0.113145	-0.0631519	-0.0170319	-0.0364485	-0.00318281	-0.0199462	-0.0146989	-0.00782466	0.0256207	-0.01922
333	1817	C	C3	C	C4	1	SC	SD	0	-0.0748417	0.0248478	0.0747103	-0.154031	0.0613927	0.00901807	-0.0307355	-0.0799931	0.0553245	-0.00608342	0.125381	-0.149654	0.186286	0.0136558	-0.0391058	-0.0245653	0.0285529	-0.0430414	0.0321785	-0.00749859
334	1932	C	C4	C	C3	1	IVC	LQD	1	-0.468038	-0.090539	0.0231561	-0.0266815	-0.0289607	0.0623105	-0.145038	0.0946236	0.0565923	0.0134265	0.0397283	0.150053	0.0943921	0.0305404	-0.00524598	-0.0442345	0.0377159	-0.0632812	0.0165219	0.0368582
335	1852	H	H2	C	C3	0	IVC	SD	0	0.0134734	0.0551829	0.0147329	-0.0788621	-0.0794826	-0.106164	-0.0103289	-0.0209239	0.073799	0.00302729	0.0141413	0.0644618	-0.112675	-0.0150529	-0.0456942	-0.0754923	-0.007399	0.0114878	-2.04725e-05	0.0365729
336	1981	C	C3	H	H2	0	SC	SD	0	0.0542535	0.104066	-0.0312298	0.0715534	-8.41911e-05	0.0193682	0.0415883	0.00767153	0.0515086	-0.0239576	0.106962	-0.0834304	0.0098704	0.0188082	-0.012723	-0.0459767	0.0174919	0.0635546	-0.0172627	-0.0162985
337	1853	H	H2	H	H1	1	IVC	LQD	0	0.098529	-0.0999395	-0.0114991	0.0212522	-0.0503569	-0.0166098	-0.0119933	-0.00773996	0.0475837	-0.0108513	-0.0938108	-0.0165184	0.0114505	0.0577255	-0.0106208	-0.0262888	0.00905402	-0.0137015	0.0229764	-0.0189574
338	1913	H	H1	H	H2	1	SC	SD	1	-0.455181	-0.0378492	-0.00542779	-0.0430331	-0.0632964	-0.02415	-0.0282921	0.0279513	-0.0558135	-0.0396259	0.107418	0.149652	0.0645873	0.00214009	-0.000532534	0.0017891	-0.0152222	-0.0719204	-0.0117132	-0.000994864
339	1854	H	H2	H	H4	1	SC	LQD	0	0.10405	-0.0964817	-0.0254288	-0.0424571	-0.015741	0.0223498	0.00208967	0.036019	0.0346773	-0.0326413	-0.0795694	0.0101749	0.00524876	0.052912	-0.000523764	-0.0128195	0.0490922	-0.0253782	0.00363139	0.0086603
341	1863	H	H2	C	C1	0	IVC	SD	0	-0.00483178	0.113881	-0.016154	-0.0146143	-0.00816726	0.0163888	-0.0508538	-0.0762839	0.0131281	-0.0142128	0.102546	0.0717804	-0.112372	0.0387374	0.0078569	-0.0112931	0.0251575	0.0525154	-0.00321663	0.0264002
342	1976	C	C1	H	H2	0	SC	SD	0	0.0416101	0.0796175	-0.0473904	0.0180934	-0.00982585	-0.0609255	-0.0513346	-0.00733777	0.0192858	0.0658098	-0.0416196	0.0189185	-0.101221	0.00123023	-0.0572029	-0.0255721	0.119797	-0.0192431	-0.0210249	0.0516875
343	1865	H	H2	H	H1	0	IVC	LQD	0	0.0763101	-0.0765933	0.000832789	0.0354722	-0.0597484	0.00889451	-0.00600225	-0.0172024	0.0425062	0.00836397	-0.0686859	0.0247003	0.0312616	-0.000480699	0.0104229	0.0141561	0.022611	-0.000303804	0.00634687	0.0327467
344	1947	H	H1	H	H2	0	SC	SD	0	0.0703961	0.0109022	-0.0663288	-0.0755084	0.012079	-0.0700564	-0.0202345	0.0101991	0.0358395	0.0238054	-0.0214374	-0.0707207	-0.0794983	-0.0503266	-0.0109861	-0.0557176	0.0116073	-0.0284692	-0.00804536	-0.00613189
347	1886	H	H1	C	C2	1	IVC	LQD	0	0.112398	-0.141025	0.0202115	0.033566	-0.0239471	-0.0833978	-0.00487346	0.0021873	0.00705476	-0.0262116	-0.132991	0.00233999	-0.0365071	-0.00776894	-0.0256359	-0.0143509	-0.0112191	-0.0209198	0.0166526	0.00600888
348	2072	C	C2	H	H1	1	SC	LQD	0	0.0895068	-0.0443481	0.0379712	0.0487173	0.0371036	-0.000795914	-0.0352762	0.0766925	-0.0118919	-0.020384	-0.100333	-0.050901	0.00960435	0.0165844	-0.0188282	0.00438432	-0.020484	-0.0192838	0.0089256	-0.00821791
349	1889	H	H1	C	C1	0	IVC	SD	0	0.0481519	0.0617919	-0.0149347	0.060328	-0.0856131	-0.0761656	-0.0404173	0.0174657	-0.0580855	0.0230514	0.0230854	-0.0237294	-0.080198	0.0296789	-0.035351	0.07728	-0.0176729	-0.00971716	-0.0401336	0.00430749
350	1975	C	C1	H	H1	0	SC	LQD	0	0.116069	-0.0460108	-0.00779679	0.0223422	0.0719198	-0.0311717	-0.0291992	0.0457971	0.019672	0.0222626	-0.118367	0.00645885	0.00799651	-0.0992532	0.0144339	0.00577512	0.0870937	0.00845754	0.0240801	-0.0448436
353	1893	H	H2	H	H1	1	IVC	SD	0	0.0104203	0.0690239	-0.0172425	-0.0384797	-0.0124373	-0.0526508	0.0019698	-0.0219296	-0.0704539	-0.00615607	0.0722621	0.0454876	-0.0922356	0.0659452	-0.106754	0.00731859	0.0542696	-0.00495518	-0.0424951	0.0380584
354	1948	H	H1	H	H2	1	SC	LQD	0	0.100421	-0.135322	-0.0858508	-0.00834944	-0.00229942	-0.0519936	-0.0232024	-0.0518328	0.0132754	-0.0328937	-0.118006	0.018935	-0.0599413	-0.0289225	-0.00748092	-0.0566871	0.0222938	-0.00177879	-0.00210742	0.00510195
355	1897	H	H2	C	C4	0	SC	LQD	0	-0.27738	0.0242105	0.149975	-0.102963	0.0539277	0.0655635	0.0996984	0.0472041	0.0255045	-0.0551052	0.059634	0.0406019	0.146366	0.109687	-0.00536372	-0.00106583	0.0259274	-0.041393	-0.0117328	0.00647629
356	1916	C	C4	H	H2	0	IVC	SD	0	0.00888461	0.116457	-0.0482722	0.0341391	-0.0316125	0.0484735	-0.027599	0.0591929	0.0118701	-0.00688988	0.180277	-0.1762	0.0951738	-0.0198126	-0.0239699	-0.0526383	-0.00383421	0.00934098	-0.0799474	0.0365181
357	1898	H	H2	C	C2	0	IVC	SD	0	-0.0298287	0.0921457	0.0653304	-0.0160294	0.00778296	-0.0447494	0.00121092	0.0426547	-0.0138451	-0.0809369	0.157264	-0.170181	0.0634905	-0.0285135	-0.0658936	-0.0564224	-0.0294027	-0.0255943	-0.0576577	0.0277332
358	2073	C	C2	H	H2	0	SC	LQD	0	0.0541386	-0.0358165	0.0682074	-0.00426229	0.0109704	0.0682579	-0.0214656	0.0442581	0.0182609	0.00928869	-0.0988071	-0.00887131	0.0412765	-0.029744	0.0137063	0.0249909	0.0640241	-0.002005	0.0137343	0.00622491
359	1915	H	H1	H	H3	1	IVC	SD	1	-0.443918	-0.040292	0.0229811	-0.0592153	-0.0532827	0.00063542	-0.0887956	0.0859038	-0.0011796	-0.0860402	0.0695172	0.113083	0.00426346	0.0319423	-0.0459146	0.0338614	0.0237835	-0.0852067	0.000118017	0.00384644
360	1974	H	H3	H	H1	1	SC	SD	1	-0.526503	-0.0331457	-0.0571292	-0.0365868	-0.04597	-0.01194	0.018565	0.0404887	0.000139626	-0.0819341	0.124635	0.137727	0.0149255	0.014322	-0.00519767	0.0211559	-0.0551797	-0.0878942	-0.0184615	-0.0216011
361	1917	C	C4	C	C3	1	SC	LQD	0	0.0901076	-0.0608303	0.00191826	0.0678012	-0.0500684	0.0407684	-0.0287752	-0.0253713	0.0124652	0.00244686	-0.072599	0.00196662	-0.00796297	0.021759	-0.025444	0.00336831	-0.0122443	-0.00339747	0.014242	0.00676823
362	1983	C	C3	C	C4	1	IVC	LQD	0	0.0726958	-0.0429044	-0.0224179	0.0649891	0.00986353	0.0888082	0.0150487	0.00786277	0.0466407	-0.0225712	-0.0568822	-0.0274743	0.000167454	0.0297224	-0.0298277	0.00410242	-0.0414224	0.0235286	0.049764	-0.0119826
363	1918	C	C4	H	H3	1	SC	SD	0	0.0332973	0.119082	-0.0498178	0.00936553	-0.0233967	0.00770839	0.0224283	0.0888128	-0.0577286	-0.00369189	0.0216046	-0.0575408	-0.0580647	0.0426184	-0.0462052	-0.069753	-0.00631596	0.0281646	-0.0259771	-0.0131315
364	1972	H	H3	C	C4	1	IVC	LQD	0	0.0749767	-0.0418861	0.0302519	0.0701209	0.021651	0.0133131	-0.00389786	0.0341114	-0.014093	-0.0399676	-0.1335	0.0116944	-0.0318255	-0.0702334	-0.00711994	-0.0027471	-0.00590762	-0.0298926	0.0132044	-0.0235107
365	1919	C	C4	H	H4	0	SC	LQD	0	0.0811327	-0.0689559	-0.00947989	0.0732562	-0.0322057	0.0120511	-0.0753945	0.0563124	-0.0158088	0.0364188	-0.105907	-0.0209432	-0.00967633	0.0233728	-0.0137223	-0.000957334	0.00895391	-0.0211777	0.00376392	0.0028482
366	1936	H	H4	C	C4	0	IVC	SD	0	0.0335842	-0.0158643	-0.0380671	-0.0862367	-0.0970882	-0.0832963	-0.0210323	0.00473902	0.00143706	0.0028001	-0.0546424	0.0333587	-0.062295	-0.0353877	-0.0179717	-0.0414017	-0.0171306	-0.0419584	-0.0125602	0.00466772
367	1920	C	C4	H	H1	0	SC	SD	0	0.038085	0.0924144	-0.0634364	0.0515321	-0.0311713	0.0172586	-0.0050968	0.0685726	-0.0390128	-0.0144964	0.13587	-0.201347	0.0719541	-0.0319285	-0.0408264	-0.0535215	0.0201671	-0.00503864	-0.0824694	0.0172113
368	1951	H	H1	C	C4	0	IVC	LQD	0	0.10654	-0.129625	-0.0705293	0.0308497	-0.0466726	-0.0460126	-0.0263527	0.0349078	0.0120293	-0.0112929	-0.143562	-0.0102138	-0.0663876	-0.0322132	-0.0120945	-0.0137039	-0.00951294	-0.0172714	-0.0258374	0.00835987
370	1946	H	H1	C	C4	0	IVC	LQD	0	0.11893	-0.097684	-0.0564272	-0.0457225	0.0394063	0.0123488	-0.00701131	-0.000717331	0.0510594	0.00630863	-0.123928	-0.0205304	-0.0106344	-0.0423081	0.039789	-0.00792067	-0.017864	-0.0062028	-0.0191276	-0.00231501
371	1934	H	H4	C	C3	0	IVC	SD	0	0.0129593	-0.0097306	-0.013635	-0.0823421	-0.10822	-0.0715044	-0.00333406	-0.0317746	0.03184	-0.0241191	-0.0374764	0.0736317	-0.0978032	-0.0402282	-0.0671024	-0.0126123	0.0105258	-0.0521753	0.0281524	-0.00628043
372	1997	C	C3	H	H4	0	SC	LQD	0	-0.0214742	0.00163838	0.0240604	0.0213298	-0.015991	0.0762978	0.0916264	0.0756988	-0.073103	0.0556278	-0.0538447	0.0376034	0.084402	-0.0601789	0.0635107	0.0286428	-0.00924339	-0.0382671	-0.0161403	-0.000856028
373	1935	H	H4	H	H3	1	SC	SD	0	0.0233792	0.0962435	0.0303957	0.00492162	-0.00183965	-0.0288285	0.0253677	0.0162274	0.0133678	-0.0507118	0.103025	-0.120304	0.0623814	-0.0021669	-0.0483602	0.0843165	0.0328863	0.0144954	0.0079608	-0.0356844
374	1973	H	H3	H	H4	1	IVC	LQD	0	0.039438	-0.0341745	0.066193	-0.0568274	-0.00747459	0.00210579	0.0281917	0.0465501	0.121845	-0.0175841	-0.0771099	-0.011192	0.0221334	-0.0170553	0.00150711	-0.0247321	-0.0326606	-0.0464253	0.0522626	-0.0245957
375	1938	H	H4	C	C1	0	SC	SD	0	0.0722114	-0.0379448	0.00742793	-0.0249921	-0.0611916	-0.111882	-0.0183301	0.0375828	0.0126195	-0.0128017	-0.108427	0.0118642	-0.0354927	-0.0651495	-0.0231261	0.0209355	-0.000881544	-0.051366	-0.0245107	-0.00689306
376	2087	C	C1	H	H4	0	IVC	LQD	0	0.00549131	-0.0201291	0.1386	0.0164143	0.0598072	-0.046849	-0.0190536	0.061492	-0.0170225	0.0376391	-0.0800568	-0.035632	0.0510169	-0.0230724	0.00548111	0.0203966	0.0490901	0.00504399	0.0266084	0.00177777
377	1939	H	H4	H	H1	1	SC	LQD	0	0.0679264	-0.0922415	0.0100969	-0.070929	-0.0100846	-0.0394228	0.0380922	-0.00207665	0.0760097	-0.0089972	-0.112096	0.0084787	0.0210544	-0.0129816	0.0370526	0.015631	0.0613835	0.00508931	-0.0161796	0.0110569
378	1950	H	H1	H	H4	1	IVC	LQD	1	-0.219906	-0.0816213	0.10101	-0.0951371	-0.057533	0.00257069	-0.102549	0.00871302	0.0128849	-0.0957383	-0.0468166	0.0400516	0.0653687	0.0498393	0.0148278	-0.0347545	0.00530613	-0.0457196	0.00927156	0.012268
381	1949	H	H1	C	C3	1	IVC	SD	0	0.0303298	0.0715239	-0.11198	-0.145962	-0.0131141	-0.0210247	0.0458671	-0.00855445	0.000652517	0.0497252	0.094851	-0.03166	-0.166446	0.0253576	0.104575	0.0219443	0.0140581	-0.0603115	0.0227143	0.0193775
382	1982	C	C3	H	H1	1	SC	SD	0	0.00685254	0.163855	-0.0574098	0.0357807	0.00359112	0.0487295	-0.0127233	-0.0656909	0.0165035	-0.00711205	0.0713242	-0.0453834	-0.10927	0.141907	0.0162405	0.0139799	0.0672346	0.0412393	-0.0179658	-0.0146029
383	1970	H	H3	C	C3	1	IVC	LQD	0	0.075549	-0.0590339	0.0589296	0.0380532	-0.0383279	-0.00494581	-0.0172678	0.0350272	0.0058775	-0.0216944	-0.103393	-0.0085446	-0.00887365	-0.00354511	-0.00400441	0.00515604	-0.0336478	-0.0294329	-0.00373579	0.0161923
384	1999	C	C3	H	H3	1	SC	SD	0	-0.0264195	0.120792	-0.000521789	-0.00418248	-0.0112346	0.0590584	0.060091	0.0996833	-0.0528781	-0.0202466	0.178187	0.038832	-0.126617	0.0621014	0.131682	0.0392845	-0.0345157	-0.00110018	0.0585482	0.0115483
385	1971	H	H3	C	C1	1	SC	LQD	0	0.033866	-0.0043689	0.0281748	-0.0296335	0.0525727	0.0275005	-0.0320346	-0.0223883	-0.0408374	0.0156411	-0.104908	0.052611	0.0123761	-0.0369399	0.0478085	0.00708026	-0.0444838	0.00331265	-0.0195171	0.00622508
386	1978	C	C1	H	H3	1	IVC	LQD	0	0.0737072	-0.00833017	0.0422252	0.0893461	0.125297	-0.0684569	-0.0394004	0.0539003	-0.0235961	0.00632826	-0.131777	0.00523778	0.0122321	-0.0793625	-0.0130028	0.00953991	0.0628607	-0.00171205	0.0378696	-0.0243688
387	1977	C	C1	C	C3	0	IVC	LQD	0	0.0992849	-0.0338786	-0.0174014	0.0555687	0.0808695	-0.0532977	-0.0295246	0.0225968	0.0289028	0.0251766	-0.125547	-0.0140221	-0.00671751	-0.0595038	-0.0128489	-0.0174125	0.053275	0.00488014	0.0507539	-0.0190686
388	1985	C	C3	C	C1	0	SC	LQD	0	0.0693666	-0.0370265	-0.0649368	0.00943188	-0.0300451	0.0362799	-0.0616152	-0.0512734	-0.00501222	0.056927	-0.0733868	0.0397469	0.0197207	0.00960343	0.0261922	-0.0235273	0.025423	0.0063751	0.00797846	0.0252531
389	1980	C	C1	C	C2	0	SC	LQD	0	0.116873	-0.0502134	0.0230395	0.0378321	0.0137598	-0.000563492	-0.00338403	0.0779617	0.0318159	0.0243484	-0.137238	-0.0176271	0.0203171	-0.00978372	0.00367787	0.018282	0.0479702	0.00327701	-0.00406044	0.0112787
390	2069	C	C2	C	C1	0	IVC	SD	0	0.0394304	0.074587	0.0208704	0.0147853	0.00617889	0.020141	-0.0119484	0.0513265	-0.0296701	-0.0286162	0.0992813	-0.0828256	0.0332043	0.00776876	-0.0086774	0.0214709	0.00196507	0.0183525	-0.00502943	-0.0355342
391	1987	H	H2	H	H1	1	IVC	LQD	0	0.103551	-0.00528737	-0.00717616	0.0110835	0.0724339	0.0524933	0.00763685	-0.0462309	0.0723607	-0.00358486	-0.0353579	-0.0424309	0.0635107	0.0775438	-0.0178947	0.0160282	0.0122489	0.0194228	0.012199	-0.042303
392	2082	H	H1	H	H2	1	SC	LQD	0	0.0938341	-0.0828445	-0.0816405	-0.0320779	0.0224675	0.0230448	-0.00319064	-0.0574799	0.0334087	-0.0342371	-0.0720891	-0.00468113	0.0318046	0.0103651	0.0402968	0.0131349	-0.00463234	0.00605988	-0.00634897	0.00907997
393	1988	H	H2	H	H3	0	SC	LQD	0	0.0474117	-0.0050804	-0.00304622	-0.00521903	0.0633049	0.0803109	-0.0403442	-0.0599828	0.0215815	-0.0189688	-0.0193248	0.018833	0.0605247	0.0708773	0.00285635	0.0139046	-0.00573782	0.036327	0.0205595	0.00814053
394	2174	H	H3	H	H2	0	IVC	SD	0	0.0248673	0.0826045	0.0554527	0.0499991	-0.0086171	-0.0356143	-0.010854	0.046165	0.0477663	-0.00583835	-0.0102533	-0.00697638	-0.0843284	0.04325	-0.151409	0.0897022	0.0362844	-0.0520068	0.00213216	-0.00934989
395	1989	H	H2	C	C2	1	IVC	SD	0	-0.0778874	0.0678271	0.0826956	0.0232873	0.0106386	-0.0490173	-0.0460506	-0.0941298	-0.0304743	-0.0496047	0.036959	0.0740513	-0.017076	0.0136082	-0.0325607	0.0235008	-0.049946	0.069989	0.00654655	0.00744675
396	2116	C	C2	H	H2	1	SC	SD	0	0.0138004	0.0901058	0.0675918	0.0543504	0.0486061	-0.0300681	-0.0393853	-0.0965273	0.010601	0.00868723	0.0398016	0.134159	-0.0615004	-0.0297083	-0.0789684	-0.0134656	0.0247562	0.0902713	0.00617913	0.00604912
397	1990	H	H2	C	C4	0	IVC	SD	0	-0.0068775	0.107508	0.0184166	0.0543755	0.00535838	0.0407761	0.0119099	-0.0100753	0.0297049	-0.0623002	0.152866	0.0697105	-0.014715	-0.102946	0.00521817	-0.0311272	-0.00309508	0.0823275	-0.00902714	-0.0543546
398	2141	C	C4	H	H2	0	SC	SD	1	-0.48865	-0.0435178	-0.0332159	-0.0695365	-0.0445122	0.102392	-0.0591035	0.112539	-0.0107154	0.0102309	0.0772831	0.228775	0.0795923	-0.00428549	0.00539018	-0.0162358	0.0495027	0.0259109	-0.0184453	-0.0260926
399	1991	H	H2	C	C3	0	SC	LQD	0	0.0696781	-0.0583291	-0.0323698	0.0183846	0.00146192	0.0589826	-0.0486239	-0.0774998	0.062636	0.00661724	-0.0371912	-0.00373746	0.0520697	0.0590519	-0.0164314	0.0378498	0.00624313	0.0401084	0.0101745	0.012008
400	1998	C	C3	H	H2	0	IVC	SD	0	-0.049601	0.0477225	-0.0217234	0.0528274	-0.112301	0.04724	0.0141003	-0.0409552	-0.0420153	0.020217	0.0464859	0.107538	0.014831	-0.0397036	0.00014468	0.0564562	0.0063198	-0.0273766	0.0133026	-0.0150444
401	1996	C	C3	C	C4	0	SC	LQD	0	0.00840099	-0.0336503	0.0430909	0.0149214	-0.00845107	0.12654	0.0908613	0.0672159	-0.070385	0.0784966	-0.0469142	0.0176225	0.111166	0.00357305	0.0732961	0.0423568	-0.00507435	-0.0284835	-0.0279613	0.0307977
402	2061	C	C4	C	C3	0	IVC	SD	0	0.0532997	0.00925774	-0.0197901	-0.0933772	0.045411	0.0228116	0.00363689	-0.00826151	-0.0554192	0.0193668	0.0716972	-0.0489654	-0.00228131	0.00698967	0.00764784	-0.0645114	-0.018086	0.0179462	0.0146468	-0.0128353
403	2000	C	C3	C	C1	1	SC	SD	0	-0.0424305	0.116309	0.0144534	0.00799168	0.0101898	0.0342367	0.0544333	0.0793125	-0.0937817	-0.0126609	0.179764	-0.00466583	-0.12556	0.0748601	0.107429	0.079969	-0.0389493	-0.0558656	0.0662468	-0.0184135
404	2085	C	C1	C	C3	1	IVC	SD	0	0.028068	0.0272261	0.0761075	0.0690276	-0.0316688	-0.0287332	-0.0469005	0.0451635	-0.0602408	0.0151591	-0.00483526	-0.0356736	-0.0246446	0.0332993	-0.0288151	0.0492948	-0.0487807	-0.00669346	-0.0318268	-0.0149032
405	2007	H	H2	C	C1	1	IVC	LQD	0	0.115768	-0.100269	-0.0535393	-0.0189086	0.0652956	-0.0271003	-0.024472	0.00555855	-0.00201039	-0.0343392	-0.0851817	-0.0507244	0.023265	0.0172262	0.0260711	-0.04442	-0.00239357	0.0122292	0.0148188	-0.00337946
406	2088	C	C1	H	H2	1	SC	LQD	0	0.0506313	-0.0491495	0.051773	0.0592211	-0.024675	-0.0366785	-0.0578779	0.0428558	-0.0679429	0.0473575	-0.149557	0.0528619	-0.0297084	-0.0488238	-0.025376	-0.00733084	0.023931	0.00389101	0.0119736	-0.0118648
407	2008	H	H2	C	C2	0	IVC	LQD	0	0.0598558	-0.0868909	0.0682337	0.00318396	0.0144284	-0.0162743	0.0691501	0.00329923	0.0248147	-0.0460774	-0.0736995	0.0123233	0.0251181	-0.00103875	0.0221144	-0.0104842	-0.0342568	-0.0388765	0.00483594	0.00442894
408	2149	C	C2	H	H2	0	SC	LQD	0	0.0923434	-0.0437824	0.0215709	0.04138	-0.00284625	0.0440397	0.0375722	0.00825483	0.0574121	0.0256181	-0.12398	0.011399	-0.00977149	-0.069427	0.00608544	0.0269434	-0.01309	-0.00358415	0.00664955	-0.0163093
409	2009	H	H2	C	C4	1	IVC	LQD	0	0.0830766	-0.105152	-0.00909444	-0.00841621	0.0118764	-0.021445	0.0306781	0.0374941	0.0446253	-0.0556417	-0.130781	0.0339987	-0.0212706	-0.0525848	0.0125088	-0.0661897	0.0166377	0.00563066	0.0255847	-0.0258455
410	2064	C	C4	H	H2	1	SC	SD	0	0.0520608	0.0684865	-0.00928563	0.00561249	0.0518391	-0.00229317	-0.0238696	-0.0375075	-0.0141342	0.00263738	0.110469	-0.127603	0.0745448	-0.056298	-0.0484365	0.0316276	0.0150422	-0.0240742	0.0315815	0.0196346
411	2010	H	H2	C	C3	1	IVC	LQD	0	0.0771456	-0.0745552	0.00185562	-0.00596381	-0.0726492	-0.0131012	-0.0137951	-0.0190364	0.0131489	-0.0143909	-0.092218	0.0203365	-0.0249963	-0.00584932	-0.0113246	-0.0410859	0.0170691	0.00689145	0.0249775	0.0215293
412	2157	C	C3	H	H2	1	SC	SD	0	0.0327425	0.135057	-0.0187244	0.089644	-0.00503592	0.0481803	0.0301784	-0.00119724	0.040797	-0.00427267	0.0473042	-0.0496498	0.0368633	0.0383796	0.00147911	0.0417404	0.0303882	0.055478	-0.00386398	-0.0120204
413	2011	H	H2	H	H1	0	IVC	LQD	0	0.10187	-0.0968466	-0.0705242	-0.0634104	0.052158	-0.00695875	0.0546334	-0.0238314	-0.0171102	-0.0178872	-0.102558	0.0423416	-0.0105904	-0.0297137	0.0301652	-0.0475129	0.00335951	0.0363776	-0.00854789	0.00536368
414	2058	H	H1	H	H2	0	SC	LQD	0	0.102406	-0.124864	-0.0281647	-0.0396808	-0.0079174	0.000611612	-0.0281879	-0.0619568	-0.0123973	0.0278443	-0.115935	-0.0125163	-0.0210038	0.0163405	0.0182535	-0.0523388	-0.0120965	0.0188208	-0.0147121	0.0269125
415	2055	H	H1	H	H3	0	IVC	SD	0	0.0487424	0.0537735	-0.0888834	0.00686943	-0.0645793	0.00384743	0.0286486	0.019061	0.0363601	0.0260606	0.0860881	-0.139244	-0.0769607	0.0320648	0.0146431	-0.0965402	0.0133546	-0.00509703	-0.0199005	-0.0506713
416	2177	H	H3	H	H1	0	SC	LQD	0	0.0726473	-0.0782499	-0.00824267	0.026845	-0.0831993	-0.00740229	-0.0121624	-0.0397278	0.0235448	-0.000623452	-0.0763944	0.0452587	-0.00910966	0.00945622	0.016719	0.0279023	0.0508874	0.00152811	-0.0345423	0.0422872
417	2056	H	H1	C	C3	1	SC	LQD	0	0.0851026	-0.0921943	-0.0344713	-0.00983918	-0.0157998	-0.0265156	0.0576786	-0.00824533	0.0247886	-0.0308308	-0.104794	0.0302529	-0.0705258	-0.0531543	0.0206068	-0.0363477	0.015259	-0.0291923	0.00129142	-0.0304482
418	2159	C	C3	H	H1	1	IVC	SD	0	0.029423	0.125337	-0.0151029	0.0525556	-0.0178826	0.0965031	0.0253397	-0.00799205	0.0526978	0.0122523	0.144603	0.00728547	-0.0602044	0.0231588	0.124854	0.0725186	0.00173812	0.0557207	0.0726097	2.9124e-05
419	2057	H	H1	C	C2	1	SC	LQD	0	0.114154	-0.0941393	-0.0619176	-0.038681	0.0437523	-0.0103909	-0.0027322	-0.0200145	0.0476364	0.0182174	-0.107606	-0.0352221	-0.00346923	0.00361261	0.0157688	-0.00825872	-0.0246676	-0.020379	0.000894246	-0.000301612
420	2117	C	C2	H	H1	1	IVC	SD	0	0.0013131	0.110029	0.0785503	0.000447755	0.100448	-0.0979878	-0.0469953	-0.0102889	0.041068	0.0523242	0.0601513	-0.140762	0.0362686	-0.0395976	-0.044852	-0.000168918	0.00391654	-0.0359985	0.00120068	-0.000828293
421	2059	C	C4	C	C1	1	IVC	LQD	0	0.0784512	-0.0373171	0.0422956	0.0259406	0.102859	-0.0926557	-0.0321916	-0.00232722	-0.059233	0.0105841	-0.152185	0.0011296	-0.00572608	-0.0407814	-0.0139866	-0.0190405	0.0306402	-0.000289602	0.0467198	-0.0155146
422	2090	C	C1	C	C4	1	SC	SD	0	-0.00335709	0.0543552	0.084052	-0.035479	0.0871779	-0.0597539	-0.0654741	0.0203591	-0.00435397	0.109066	0.0896135	-0.00902217	0.043135	-0.0681291	-0.000449483	0.0453209	0.00378862	0.0521192	0.0132115	0.026878
423	2060	C	C4	C	C2	1	SC	LQD	0	0.0933435	-0.0996637	0.00760803	0.00759235	0.117168	-0.0218422	-0.00586721	0.032387	-0.108023	0.0121232	-0.144546	0.00193689	-0.0501893	-0.0350781	-0.00190691	-0.0669831	0.0266222	0.0464174	-0.0161007	-0.0106337
424	2070	C	C2	C	C4	1	IVC	LQD	0	0.0641632	-0.0527135	0.0579888	0.0664277	-0.00454639	0.0150156	-0.0579883	0.0305826	-0.0404332	0.00814449	-0.0889629	0.0363753	-0.00377833	0.0188397	-0.0684814	0.0382238	0.0326511	0.045343	0.0494361	0.0186313
425	2063	C	C4	H	H1	1	IVC	LQD	0	0.113916	-0.101135	0.0545373	0.0595171	-0.0218178	-0.0950176	-0.011327	0.0203321	0.0215931	0.0322602	-0.168947	0.0425093	-0.0145685	-0.059841	-0.0154479	0.000958219	0.0576302	0.0215652	0.0131858	-0.0297531
426	2081	H	H1	C	C4	1	SC	SD	0	0.0562197	0.0285679	-0.102002	-0.0665446	0.0161298	0.0378098	0.0267368	-0.0274724	-0.0585845	-0.029896	0.0219968	-0.0402592	-0.0508547	0.0180404	0.0264469	-0.0496376	0.000502873	0.0118628	-0.00393558	-0.0130389
427	2074	C	C2	H	H3	1	SC	LQD	0	0.0767665	-0.0606961	0.0505191	0.00212887	0.00953162	0.0376801	0.00565421	0.0231357	0.0223623	-0.009193	-0.106006	-0.0273967	0.0515106	0.0409086	0.00691046	0.0175138	-0.0080206	0.0201995	0.0224123	-0.00722307
428	2110	H	H3	C	C2	1	IVC	LQD	1	-0.580059	-0.106522	-0.0495809	0.0644416	0.0544655	-0.0461927	0.0648985	0.00167011	0.00715062	0.0661697	0.088345	0.141853	0.122385	0.0799037	-0.00608426	-0.0663622	0.018253	-0.050413	0.010046	0.0375365
429	2080	H	H1	H	H3	0	IVC	SD	0	0.0491252	-0.0108494	-0.0750002	-0.0511743	-0.00239198	0.0268767	0.000704083	-0.0638053	0.0409254	0.00134585	0.0480565	-0.054782	0.0458727	-0.0611631	0.0392202	0.0339257	0.00136772	-0.0206439	0.00606084	0.0025526
430	2107	H	H3	H	H1	0	SC	SD	1	-0.575421	-0.0476025	-0.082322	0.140479	0.0175895	-0.131805	0.0709982	-0.124412	0.126539	0.00987977	0.137379	0.186451	0.0298169	0.00686228	-0.0119994	0.035341	0.0329083	-0.04095	-0.00997248	-0.0124226
433	2084	H	H1	C	C2	1	SC	SD	0	0.0869786	-0.00596244	-0.107747	-0.0168889	-0.0386564	-0.0461059	-0.0352376	-0.0649266	0.0136392	-0.0120026	-0.0417144	-0.0292266	-0.095071	0.0173245	-0.0618302	0.00180085	-0.0160716	-0.0394816	-0.0234774	0.0100696
434	2150	C	C2	H	H1	1	IVC	LQD	0	0.0780773	-0.0100847	-0.0379909	0.0227587	0.0509253	0.0713042	-0.0114903	-0.0373571	0.0263111	0.0328563	-0.0532163	0.00259838	0.0129889	-0.043172	0.0144281	0.0137867	-0.0353757	-0.0193014	0.0312213	-7.26934e-05
435	2086	C	C1	C	C2	1	IVC	SD	0	-0.016826	0.0690056	0.112332	-0.0496099	0.107753	-0.0404509	-0.0716187	0.0264967	0.00421875	0.047279	0.0490828	0.0313929	0.000884673	-0.0677437	0.0207812	0.0135588	-0.0259073	0.00212746	0.00728201	0.000272947
436	2118	C	C2	C	C1	1	SC	SD	0	0.0465356	0.089319	0.00971308	0.0433005	0.0898856	-0.0197168	-0.0588275	0.0450901	-0.0253449	0.0175238	0.0993821	-0.103663	0.0297567	-0.0450995	-0.0266488	-0.03862	-0.0291873	-0.0232819	-0.00016041	0.0344362
437	2105	C	C4	H	H3	1	IVC	LQD	0	0.0698165	-0.100812	-0.00501051	-0.00103075	-0.0189635	0.0266549	0.00901576	0.00966056	0.039228	-0.00887265	-0.0726754	-0.0430351	0.0355122	0.0515856	0.0108087	-0.00992141	-0.0359704	-0.00429737	-0.00886666	-0.00501383
438	2175	H	H3	C	C4	1	SC	LQD	0	0.054286	-0.0302581	0.0754311	0.0499542	0.0190293	0.0114406	0.000335177	0.0214434	0.039735	-0.00795843	-0.0125729	-0.0693412	0.0537883	0.00375991	0.00940942	0.0344657	-0.0348195	-0.041153	0.0090734	-0.0380264
439	2106	C	C4	C	C3	1	SC	SD	0	0.0484407	0.0790445	-0.0395806	0.0403133	-0.0890757	0.00245505	-0.0509205	0.0108544	-0.0202329	0.020799	0.023534	0.034629	-0.069778	0.0257753	-0.0420897	-0.0101166	0.0575913	0.0258213	-0.0329666	0.0540798
440	2154	C	C3	C	C4	1	IVC	LQD	0	0.095686	-0.0522271	-0.00683259	0.0627528	0.0165797	0.0611379	-0.00405728	0.0530879	0.00693188	0.0154749	-0.110248	-0.0046895	0.0188256	-0.0206903	-0.00410357	0.0256521	0.0298787	0.014803	0.0183937	0.00345433
441	2108	H	H3	C	C3	0	IVC	SD	1	-0.571399	-0.041932	-0.0817821	0.116766	0.0408422	-0.143356	0.179991	-0.102116	0.0344114	0.0319229	0.162047	0.203723	0.0211677	-0.0331477	0.0228774	0.0193952	-0.0548464	-0.0322737	-0.0384592	-0.0854058
442	2160	C	C3	H	H3	0	SC	LQD	0	0.0651296	-0.0336712	0.0360148	0.0459836	0.00942691	0.101889	0.00717861	0.00352063	0.0487673	0.000910678	-0.0547643	-0.0025931	0.0605082	0.058196	0.0119268	0.0283753	0.0537565	-0.0066904	-0.00317459	-0.00700461
443	2112	H	H3	C	C4	1	IVC	LQD	1	-0.479637	-0.0539475	0.038778	0.00206338	-0.00851889	0.048266	-0.112559	0.0365372	0.111501	-0.0062857	0.0548301	0.0901361	0.112691	0.087034	-0.00433559	-0.00978157	0.0112819	-0.0126132	0.00596381	0.0273092
444	2139	C	C4	H	H3	1	SC	SD	1	-0.470599	-0.0236849	0.0219358	-0.0162083	-0.0107816	0.0482489	-0.096074	0.0268417	0.0852769	-0.0514111	0.072252	0.196662	0.047708	0.000476294	-0.0365226	-0.061131	0.00680166	0.0280663	0.0458949	-0.018494
445	2119	C	C2	C	C4	0	SC	SD	0	-0.0980089	0.077193	0.0922357	-0.0344681	0.0197304	-0.0325496	-0.0953063	-0.0295083	0.0237072	0.122713	0.0208236	0.0356616	0.00964245	0.0276259	-0.0374816	0.0787299	0.0353221	-0.00493409	0.00195183	0.0313876
446	2138	C	C4	C	C2	0	IVC	SD	1	-0.504667	-0.0396224	-0.0322609	-0.0601519	-0.0234271	0.0346796	-0.033874	0.0681453	0.00632887	-0.0233751	0.110325	0.20302	0.0235562	-0.0419444	-0.0138757	-0.0307543	-0.0353835	0.0201518	-0.00733247	-0.0507765
447	2120	C	C2	H	H3	1	IVC	LQD	0	0.114315	-0.0441957	-0.0157657	0.0252533	0.0706062	-0.00921994	-0.00491734	0.00504186	0.0681787	0.032758	-0.110973	0.0161168	-0.00903917	-0.0697474	0.00303077	0.026273	0.0499486	-0.00382359	0.0056411	-0.0239201
448	2176	H	H3	C	C2	1	SC	LQD	0	0.0404261	-0.0123868	0.00207972	0.0733123	-0.0616769	-0.0175741	-0.01115	-0.030604	0.00464468	-0.00466919	-0.0567196	0.0205276	-0.0313267	0.0187269	-0.0616973	0.0234817	-0.0273332	-0.0112296	0.0438784	0.0135233
449	2121	C	C2	C	C3	0	SC	LQD	0	0.106846	-0.0627837	-0.00861242	0.0294918	0.059813	0.00766454	-0.00806389	-0.0115378	0.0347523	0.0282273	-0.125799	-0.027071	0.0163253	0.000668577	-0.000334859	0.0184175	0.0463253	1.36477e-05	-0.00200056	0.0107383
450	2158	C	C3	C	C2	0	IVC	LQD	0	0.0992695	-0.00405756	0.0164965	0.0974581	0.101902	0.0464195	-0.0154905	-0.0340904	0.0373972	0.0454192	-0.0693366	-0.062096	0.0470225	0.0504605	-0.0448355	0.0570591	0.0279882	0.0339627	0.0181537	-0.0449168
451	2123	C	C4	C	C2	1	IVC	LQD	1	-0.470665	-0.0735347	0.0202231	-0.0634903	-0.0029909	0.0614875	-0.0452774	0.0878509	-0.0672667	0.00989617	0.0484687	0.134824	0.0820406	0.0212598	0.0199791	-0.0101624	-0.041551	-0.0650555	-0.0268149	0.0175863
452	2209	C	C2	C	C4	1	SC	LQD	0	0.00589333	-0.0179629	0.130514	0.087998	-0.0311977	0.029257	-0.0237272	-0.0448539	-0.0590922	-0.00873793	-0.0564756	0.0556985	0.039167	0.0411639	-7.056e-05	0.0191125	0.0266213	0.0109199	0.00550719	0.0380245
453	2125	C	C4	C	C3	0	IVC	LQD	1	-0.407329	-0.0451231	0.0156465	-0.080441	0.0727495	0.0641941	-0.0479976	0.130129	-0.0588502	0.0041684	0.0454803	0.0933166	0.094712	0.0707556	0.00383978	0.00331442	0.0245396	-0.0634112	-0.0261974	0.010453
454	2186	C	C3	C	C4	0	SC	SD	0	-0.0312825	0.0722681	0.0564542	0.00708386	-0.00879246	0.0427685	0.0208399	0.00768964	0.0183906	0.00888402	0.142338	0.0545269	0.0330774	-0.077567	0.000437336	0.0358174	0.00183642	0.0529412	0.0343452	-0.0230925
455	2126	C	C4	H	H3	1	IVC	SD	1	-0.596795	-0.0802245	-0.0995328	0.0122715	0.0359549	0.0156116	0.0348426	-0.0283216	-0.00856547	-0.0401253	0.117297	0.240493	0.0291871	0.0153018	-0.032882	-0.0205274	0.0684512	-0.0188014	-0.0234866	-0.0164382
456	2187	H	H3	C	C4	1	SC	SD	0	-0.0839159	0.0599294	0.135649	0.0143468	-0.021414	-0.110309	-0.0417661	0.0372305	-0.0142543	-0.024789	-0.0741235	0.0329073	-0.0882093	-0.0788554	-0.061713	0.0655377	0.0316927	-0.0804021	-0.0450345	0.0118092
457	2127	C	C4	H	H1	1	SC	SD	1	-0.566826	-0.0953311	-0.081072	-0.0258131	0.029648	0.0170723	-0.0353937	0.0757174	-0.0631997	0.0209563	0.102781	0.210813	0.03358	0.00746668	-0.0238944	-0.00785821	0.0293411	-0.042535	-0.0352388	-0.0153536
458	2167	H	H1	C	C4	1	IVC	SD	0	0.068318	0.0123758	-0.0689174	-0.0303773	-0.0430101	-0.0367907	0.0492205	0.0368166	0.0121257	-0.0365064	0.0419869	-0.0677704	-0.0844578	0.0236582	-0.0259702	-0.0518855	-0.0226782	-0.00576506	-0.0239651	-0.0287399
459	2140	C	C4	H	H4	0	IVC	LQD	0	0.0728765	-0.0275597	0.0255172	-0.0246649	0.00393393	-0.0129922	0.0460057	0.0737733	-0.0327489	0.0119487	-0.0731009	-0.0340821	0.0160235	0.0582075	-0.0388248	0.0251171	0.0476663	-0.022099	0.00337503	-0.0199696
460	2195	H	H4	C	C4	0	SC	LQD	0	0.0965228	-0.0825479	0.058635	0.00594474	0.0214817	-0.063816	0.0177965	0.0586331	0.0210145	-0.0159876	-0.141238	-0.0618128	-0.0259624	0.0153285	-0.0205047	0.0134942	-0.0301729	-0.0156225	0.00218948	-0.00803731
463	2155	C	C3	H	H4	1	SC	SD	0	0.0168219	0.142262	0.0221704	0.00563052	0.0710689	0.0514821	-0.0376008	-0.00980847	0.068576	0.053433	0.0964772	-0.0986179	0.00507777	0.0209778	-0.0128244	-0.0220246	0.00998843	0.0551846	-0.0434734	-0.040996
464	2196	H	H4	C	C3	1	IVC	LQD	0	0.135676	-0.043949	-0.0552085	0.0460072	0.0846569	-0.0485328	-0.00871516	0.0442336	0.0596059	0.0252204	-0.132987	-0.0871086	0.00325571	-0.00635301	-0.0175982	0.00933539	-0.00364822	0.00296996	0.0400128	-0.0337448
469	2170	H	H1	H	H3	0	SC	SD	0	0.0365494	0.03917	-0.0581006	-0.0113982	-0.125247	-0.000824799	0.00389872	-0.0289669	0.00632023	0.0242579	0.0466266	0.0544563	-0.0658738	0.0235049	-0.0404381	-0.0205893	0.0285444	0.0460654	-0.0195919	0.0431601
470	2189	H	H3	H	H1	0	IVC	LQD	0	0.0864715	-0.0720179	0.0241648	0.0266542	0.000599879	-0.019848	0.0540999	0.0316553	0.0477875	-0.0480376	-0.17592	0.0378293	-0.0468351	-0.0752741	-0.0215943	-0.00723717	-0.00446171	-0.0172068	0.0102733	-0.0396319
471	2181	C	C3	C	C2	0	IVC	SD	0	0.00267741	0.047707	0.103013	0.0709922	-0.035751	0.0274242	-0.0356808	-0.0339432	-0.0192091	0.0265101	0.0153569	0.0192849	0.0148114	0.0270776	-0.0399619	0.0647569	0.0319977	0.00785175	0.0076523	0.0075968
472	2208	C	C2	C	C3	0	SC	SD	0	0.0684014	0.0847208	-0.00991756	0.0331465	0.0496339	0.00433489	-0.0145281	-0.0058437	-0.00718824	0.0459913	0.0534997	-0.0447777	-0.0125315	-0.0533514	-0.00244313	0.0069822	0.0138648	0.0282803	-0.000132655	0.00995924
473	2182	C	C3	H	H3	1	IVC	LQD	0	0.039777	-0.0690641	0.0944743	0.0250969	0.115694	-0.0166572	-0.0116998	-0.0550982	0.00469001	0.0076127	-0.100843	-0.0628336	0.0588687	0.0735588	-0.0625528	0.00913599	0.00286881	0.0504856	0.0657923	-0.0647102
474	2227	H	H3	C	C3	1	SC	SD	0	-0.0767298	0.0717659	0.101858	0.00615325	-0.00669117	0.0677256	-0.0133636	-0.00946663	-0.0148455	-0.0393494	0.158342	-0.0343055	0.0814928	-0.0247566	-0.0268798	-0.0147356	-0.0246526	-0.0233129	0.0339559	0.00223445
475	2185	C	C3	C	C1	1	IVC	SD	0	0.0316815	0.0797165	0.0032837	0.0167312	0.0562335	0.0519742	-0.0238778	-0.0290256	0.0343211	0.0180238	0.12643	-0.0928207	0.0808362	-0.00667079	0.00110642	0.0101887	0.00942396	0.0232431	0.00232495	0.00645127
476	2222	C	C1	C	C3	1	SC	SD	0	0.0688721	0.0979703	-0.0753301	0.0243232	0.030883	0.0454975	-0.0212264	0.00593713	0.0317515	0.0397519	0.128228	-0.0366067	0.00984401	-0.0785403	0.026428	-0.00559075	-0.00515444	0.0617661	-0.0135703	0.0171344
477	2188	H	H3	H	H4	0	IVC	SD	0	-0.00578571	0.0836024	0.0915537	-0.0325507	-0.0172198	-0.0272437	0.0639078	-0.00577236	0.111913	-0.0535185	0.131702	-0.136796	0.0403609	-0.0399566	-0.0593507	0.0588223	-0.0336771	-0.0497484	-0.00579528	-0.00519109
478	2194	H	H4	H	H3	0	SC	SD	0	0.00479665	0.00965343	0.12875	-0.0873334	-0.064518	-0.114397	-0.0299714	0.0183378	0.0570599	0.034818	-0.11136	-0.0547332	-0.0471412	0.0400879	-0.0579436	0.0191512	-0.0279433	-0.0474239	-0.0165534	-0.0064708
481	2191	H	H3	C	C1	1	IVC	SD	0	0.0679696	0.091044	-0.0466883	-0.00426845	0.0290264	-0.0525416	-0.00467111	-0.0062143	0.0319194	-0.026806	0.0931899	-0.142052	0.0207331	-0.0828638	-0.0422928	0.00748595	-0.0156952	-0.0816242	-0.0119421	0.0182655
482	2218	C	C1	H	H3	1	SC	LQD	0	0.0917203	-0.0985488	0.0322142	0.0849118	-0.0513497	0.0132013	-0.0221848	0.00503361	-0.0165665	0.0449471	-0.102854	0.0657031	0.0164642	0.0304789	0.0158229	-0.00742022	0.0497992	0.0118086	0.00739883	0.0418397
483	2192	H	H4	H	H1	0	IVC	SD	0	0.0467809	0.105491	0.00220533	0.0175526	0.0472908	-0.0248676	0.0345396	-0.0382675	0.0641187	-0.0031188	0.074147	0.0283904	-0.0141777	-0.0505242	-0.0115209	0.0520623	0.00741665	0.05299	0.0163319	-0.00204202
484	2201	H	H1	H	H4	0	SC	LQD	0	0.103674	-0.0920836	-0.0916511	-0.0278152	0.0355362	-0.0613061	0.00833485	-0.0243606	0.0219812	-0.0227423	-0.138189	-0.0216943	-0.0462055	-0.016173	-0.000494191	-0.040931	0.0155108	0.00529473	-0.00827197	0.0114623
485	2193	H	H4	C	C2	0	IVC	SD	0	0.053586	0.0713963	0.0164963	0.0454358	-0.014372	-0.0555392	0.0485903	0.0136539	0.056524	0.00407616	0.0724666	-0.133859	0.0533465	-0.0183037	-0.0378495	0.075609	0.0360993	-0.00314376	-4.08721e-05	-0.0619042
486	2206	C	C2	H	H4	0	SC	SD	0	0.04216	0.119224	0.014863	0.0522648	-0.00968639	0.0227579	0.00604853	0.0271759	0.023616	0.00644544	0.076408	-0.00740476	-0.00782946	-0.0202909	-0.00710372	-0.0160668	0.017246	0.0768958	0.00540533	0.0171783
487	2197	H	H1	C	C1	0	IVC	LQD	0	0.100734	-0.105021	-0.0862448	-0.0491561	0.0355908	-0.0248714	-0.0163651	-0.00941885	0.0279823	-0.0145686	-0.106924	-0.0645638	-0.0597056	-0.0115287	0.010678	-0.0901657	0.0163858	0.0271763	-0.0200861	0.00657715
488	2220	C	C1	H	H1	0	SC	SD	0	0.081556	0.0852545	-0.0724062	0.0345221	0.0549269	0.0143518	0.0327233	0.0222299	-0.0230935	0.0645931	0.0536078	0.00435676	0.00353236	-0.0957943	0.00887889	0.0345651	0.0396162	0.0560194	0.0296113	0.00283851
489	2199	H	H1	C	C2	1	IVC	LQD	0	0.11478	-0.0839302	-0.0253297	0.0148627	0.0193294	-0.0916809	0.0241462	0.0492678	0.0453122	-0.0275454	-0.128001	-0.0216261	-0.0277529	-0.0236503	-0.0282143	0.00687945	-0.0191497	-0.02447	0.0216724	-0.00637507
490	2249	C	C2	H	H1	1	SC	SD	0	-0.0577096	0.0748043	0.115165	-0.104384	-0.0203608	-0.0167289	0.00805739	-0.0143331	0.0735488	-0.0324143	0.166823	-0.0930709	0.142415	-0.0326948	-0.0254578	-0.00618279	0.0106185	-0.00242292	0.00717634	0.0620949
491	2200	H	H1	H	H3	1	SC	SD	0	0.0153118	0.0824874	-0.05156	-0.0908946	0.00402702	-0.0423438	0.0120865	-0.0266267	0.0313924	0.0349891	0.0770205	-0.0209003	-0.0949457	-0.0645972	0.0961101	0.0419785	0.0220453	-0.0460424	0.0467023	0.000749237
492	2226	H	H3	H	H1	1	IVC	LQD	0	0.0508796	-0.11765	0.0704891	0.0296409	-0.0611368	0.0269202	-0.0178987	-0.050314	0.0125978	-0.0275864	-0.110072	0.0214801	-0.027669	0.0241121	-0.0588381	0.017369	-0.0588176	0.0206144	0.0394622	0.0173424
493	2202	H	H1	C	C3	1	IVC	LQD	0	0.0749165	-0.0675877	0.025678	-0.0816065	0.00453348	-0.0601643	0.0298225	0.0499401	0.105577	0.0052578	-0.0993636	-0.0282411	-0.0305619	-0.0190934	0.00403508	-0.0139834	-0.00577693	-0.00435906	-0.00321013	-0.0116415
495	2204	C	C2	H	H3	0	IVC	LQD	0	0.0942693	-0.00715743	0.0454351	0.0892638	0.033679	0.00440786	0.014807	0.0514817	0.01761	0.031095	-0.107958	-0.0573107	0.0345828	-0.0244921	0.0142394	0.0676206	-0.0138804	-0.0263036	-0.0342098	0.0055378
496	2223	H	H3	C	C2	0	SC	LQD	0	-0.0215341	-0.0578565	0.0924014	-0.0543349	-0.0216206	0.0727845	0.0547814	-0.0382585	0.0214159	-0.0289482	-0.0273327	0.0268523	0.0849969	0.0665312	0.00782631	-0.0261715	-0.0463059	0.000721112	0.0361422	0.00746797
497	2210	C	C2	C	C1	0	IVC	LQD	0	0.0961057	-0.0125043	0.018765	0.0523623	0.0807425	-0.00645956	-0.0354121	0.00492659	-0.0140106	0.0460578	-0.116151	-0.00675138	0.0280332	-0.0750859	0.0254227	0.0290346	0.0540758	0.0148995	-0.00897823	-0.0180788
498	2219	C	C1	C	C2	0	SC	SD	0	-0.160134	0.0676607	0.138766	-0.022039	-0.0654893	-0.0265055	-0.0210249	-0.0383566	-0.0456105	0.0540049	0.0502048	0.105751	0.0612874	-0.0170555	0.0234253	0.0475558	-0.00123214	0.0309803	-0.00806734	0.0137372
499	2240	C	C1	H	H3	0	IVC	LQD	0	0.0843281	-0.0527589	0.0187288	0.0544634	-0.0495087	-0.0312076	-0.0421922	0.0301694	0.037734	0.0617741	-0.1185	-0.0193834	0.000931906	-0.0121626	-0.0120122	0.0274607	0.0243771	-0.0244596	-0.0171359	0.0170754
500	2256	H	H3	C	C1	0	SC	LQD	0	0.0799051	-0.0804981	0.0219582	0.0227998	-0.0792859	0.00574297	-0.0152923	-0.0117214	0.0160977	0.00790741	-0.0654205	0.00602887	-0.0293391	0.0258853	-0.0142632	0.0509272	-0.0267187	-0.00465616	-0.0221362	0.0330836
501	2241	C	C1	C	C2	0	IVC	LQD	0	0.0995296	-0.088127	-0.0267223	0.0547835	-0.0340343	-0.0544285	-0.0278662	0.0435224	0.00435607	0.0207998	-0.123925	-0.00933009	-0.01835	-0.0364226	-0.0127305	0.0198692	0.00374622	-0.0280345	-0.00715544	0.00462424
502	2250	C	C2	C	C1	0	SC	LQD	0	0.0705522	-0.0978069	-0.0331121	-0.0332753	0.0570527	-0.0193734	-0.00170573	-0.0158462	-0.045596	-0.0112255	-0.126527	0.0159034	-0.000994925	-0.00263841	0.0134339	-0.0336637	-0.0047339	-0.00686531	0.02156	0.00865187
503	2243	C	C1	C	C3	1	SC	LQD	0	0.000243698	-0.0754627	0.0118719	-0.0155419	-0.00368094	0.0551332	-0.0390975	-0.0551386	-0.131153	0.081094	-0.0748463	0.0196737	0.0694426	0.0211611	0.05293	0.00721255	0.0414778	-0.0188144	-0.0257506	0.0185159
504	2252	C	C3	C	C1	1	IVC	LQD	1	-0.588506	-0.134532	-0.0482722	0.118064	0.0622264	-0.0500513	0.12497	-0.0537264	-0.0147054	0.147697	0.104557	0.15563	0.136806	0.0745999	0.0074132	-0.0515689	0.0402533	-0.0620028	-0.00515576	0.0484277
505	2246	C	C2	C	C3	1	IVC	SD	0	-0.0318966	0.0427712	0.140109	-0.0242821	-0.0671244	-0.0929113	-0.00572692	-0.0536356	0.00305982	0.025692	0.00472465	-0.0418865	-0.0186562	0.0595257	-0.0654944	0.0748039	0.00704836	0.00508001	-0.0362947	-0.0367035
506	2251	C	C3	C	C2	1	SC	SD	1	-0.596641	-0.0465652	-0.0897347	0.0720308	0.0460094	-0.071848	0.104896	-0.0254725	-0.0322914	0.0585242	0.143964	0.198151	0.0974483	-0.0274469	0.0140137	-0.0441416	-0.0330901	-0.0219923	-0.0189539	-0.00888267
507	2257	H	H3	C	C2	0	IVC	LQD	0	0.0890615	-0.0512538	0.0283655	0.0139115	-0.00292561	0.00455605	0.0353956	0.0167929	0.0228783	-0.0514382	-0.0662212	-0.0206223	0.000651058	-0.00211177	0.0266365	-0.00177361	-0.0351069	-0.00308304	-0.00682374	-0.00709549
508	2279	C	C2	H	H3	0	SC	LQD	0	0.101389	-0.0781209	-0.00735055	0.0316067	0.0018554	-0.00779339	-0.00786709	0.0633058	0.0121279	-0.0162613	-0.114928	0.00436794	-0.00837578	-0.0590873	0.0193126	-0.00635626	-0.0141621	-0.0248574	-0.00362488	-0.0131572
509	2287	H	H2	H	H3	1	IVC	SD	0	0.0239	0.102729	-0.0187393	-0.0662983	-0.0418367	0.0177774	0.0033938	0.0390644	0.0539583	-0.0526687	0.104298	-0.0807515	-0.0103036	-0.0370044	-0.0283894	-0.0660318	-0.0258858	-0.00601678	-0.0094557	0.0298557
510	2315	H	H3	H	H2	1	SC	LQD	0	0.111053	-0.0884709	0.00242936	-0.00820545	-0.0140437	0.0030476	0.0451207	0.0237393	0.0646364	-0.0297986	-0.139178	-0.0367508	0.00387334	-0.0279375	0.0414729	0.022839	-0.0308774	0.0066042	-0.02398	0.00513421
511	2288	H	H2	H	H4	1	IVC	SD	0	-0.0112798	0.0903997	0.0229426	0.00115789	-0.10272	-0.0294636	-0.0199356	-0.0337563	-0.0194191	-0.0371909	0.0600811	0.000800278	-0.058498	0.0590296	-0.0537232	0.0494769	-0.0521318	-0.0296495	-0.0370125	-0.0236206
512	2310	H	H4	H	H2	1	SC	SD	0	0.0647733	0.0464022	-0.117398	-0.0441435	-0.0228147	0.00747824	-0.017206	-0.0247899	0.0094503	-0.0147884	0.0903973	-0.111349	0.0303281	-0.0199604	0.0103859	-0.00503476	-0.0106843	-0.0110663	-0.0342223	-0.0207492
513	2290	H	H2	C	C3	0	IVC	LQD	0	0.0873561	-0.0401045	-0.0224825	-0.0107957	-0.00885844	0.0359082	0.00905316	0.0445649	0.0433753	-0.047643	-0.082084	-0.00710304	0.00205567	-0.0202844	0.0180996	-0.020815	-0.0291097	-0.0216836	0.0214193	0.00624338
514	2304	C	C3	H	H2	0	SC	SD	0	-0.00764128	0.102942	0.0740975	0.0289495	0.0400776	0.0661189	0.0493527	0.0441945	-0.01788	-0.0154088	0.0960502	-0.00778557	-0.00409403	-0.00272774	-0.0134157	-0.0454381	0.0323946	0.0828539	0.0102788	0.0235996
515	2303	C	C3	H	H4	0	SC	LQD	0	0.0476509	-0.0894545	-0.00298403	-0.0044438	-0.0813407	0.077439	0.0144981	-0.0379968	-0.089272	0.050843	-0.0648365	0.0890305	0.0148698	-4.47326e-05	0.0303664	-0.0456649	-0.0330544	0.0420848	0.024523	0.0167235
516	2311	H	H4	C	C3	0	IVC	SD	0	0.059027	0.0737858	-0.0302027	-0.0985025	0.0227474	-0.0835368	-0.0139793	-0.000619073	0.0480133	0.0377459	0.0233835	-0.0615013	-0.0194979	0.0130412	-0.023676	-0.0148275	0.0448642	0.000501256	0.00641203	-0.0185412
519	2309	H	H4	C	C4	0	IVC	SD	0	0.0414908	0.047693	-0.100615	-0.0703374	0.012886	-0.0527095	-0.00418405	-0.0210768	-0.0325453	-0.0210908	0.0859751	-0.0670775	-0.159631	0.0682745	0.117496	-0.0228563	0.0192253	-0.0825161	-0.00929143	-0.0261974
520	2332	C	C4	H	H4	0	SC	SD	0	0.0536923	0.0855383	-0.0977236	0.0145957	0.0249835	0.0390463	-0.0489665	0.0060728	-0.0464121	-0.0115523	0.142926	-0.0954149	0.0615513	-0.0185982	0.0139319	-0.0302389	0.00294788	0.0348969	-0.0271852	0.019241
521	2314	H	H4	C	C1	0	SC	LQD	0	0.0828355	-0.126013	-0.0413916	-0.0112259	-0.0124773	0.000311593	-0.0343789	-0.0545173	-0.0105378	0.00836905	-0.117346	-0.0122259	0.0336967	-0.00465202	0.065213	0.0425106	-0.0122539	-0.00189974	-0.0644252	0.024755
522	2334	C	C1	H	H4	0	IVC	SD	0	0.0231523	0.129743	-0.000135498	-0.0236982	0.0336038	-0.0476765	-0.0391117	0.0268543	0.0347263	0.0708967	0.000702563	-0.0439323	-0.0659759	0.0341886	-0.0390627	-0.0401727	-0.0229284	-0.00292489	-0.0368231	-0.00844554
523	2317	H	H3	C	C3	0	SC	LQD	0	0.0292062	-0.043406	0.103177	0.0899977	0.0356841	0.0435573	0.0131589	0.000300474	-0.0190191	-0.067872	-0.0496312	-0.0159695	0.0531692	-0.0121008	-0.00660869	0.00636897	-0.0470649	0.0114854	0.0561659	-0.00131933
524	2340	C	C3	H	H3	0	IVC	LQD	0	0.0807525	-0.0844191	0.013755	0.0301379	-0.0633782	0.0033712	-0.0108808	-0.0108202	0.0234876	0.00912158	-0.115197	-0.0464276	-0.0138397	0.0441751	-0.00548236	0.00571415	-0.0147234	0.0255434	-0.0379325	0.0160175
525	2321	C	C3	C	C4	0	IVC	SD	0	0.0317564	0.131819	-0.0534945	0.0629554	0.0178479	0.0678793	0.021126	0.0335187	0.0406463	-0.0670566	0.117197	-0.0323589	0.0213229	-0.0370899	0.00232736	0.0154445	0.00452899	0.0831015	-0.00626278	0.0093676
526	2331	C	C4	C	C3	0	SC	SD	0	0.0665018	0.0686215	-0.0306368	0.052535	-0.0136612	0.0159989	-0.0140404	0.0649324	-0.00749537	-0.0176468	0.0768593	-0.0302255	-0.0458319	-0.00993631	-0.0142326	-0.00231569	0.0326467	0.0244592	-0.0241388	0.0130267
527	2322	C	C3	C	C1	0	IVC	SD	0	0.00733175	0.146569	-0.0948244	-0.0465439	0.0157204	0.0226433	-0.0464175	0.0355002	0.0522067	0.0594882	0.0635051	0.000272871	-0.0287915	0.0357732	-0.00310241	-0.0209456	0.0238499	0.0544755	-0.0214177	0.0133723
528	2335	C	C1	C	C3	0	SC	LQD	0	0.0808386	-0.075583	0.0234505	0.0724741	-0.0746976	-0.0586362	-0.018076	-0.00533678	0.00398084	0.0362595	-0.0960732	-0.0398793	-0.0214802	0.0198871	-0.0120642	0.0165397	-0.0125838	-0.0200071	-0.0274676	-0.0140467
529	2333	C	C1	C	C4	1	SC	LQD	0	0.0281424	0.0024861	0.0810766	0.0178222	0.105307	-0.0259411	-0.0624868	0.0484428	-0.0334678	0.0209405	-0.128413	0.0107602	0.00583017	-0.0198846	0.00985922	-0.00435415	0.0666433	-0.00148243	0.00666942	0.0017005
530	2357	C	C4	C	C1	1	IVC	SD	1	-0.579067	-0.0367582	-0.0747797	0.04359	0.0235163	-0.01158	-0.0374538	-0.0231933	0.0534297	-0.0251235	0.106099	0.232989	0.0736396	-0.0114302	0.0017249	-0.0488034	0.00143201	0.00263153	-0.00952523	-0.0575383
531	2342	C	C3	C	C4	1	IVC	LQD	0	0.0819089	-0.0612677	0.0394798	0.0526223	0.0355672	0.0100941	0.0105918	0.0111014	0.0327379	-0.0287163	-0.0885246	-0.0489368	0.0509804	0.0811871	-0.0336013	0.0146429	0.0365002	0.0415601	0.00761016	-0.0406199
534	2379	C	C2	C	C4	0	IVC	SD	0	0.0469483	0.0809184	-0.107894	-0.00916651	0.00750392	0.0177111	-0.0495863	0.000125121	-0.052226	0.012859	0.111569	-0.087409	-0.0763809	0.0509184	0.0419862	-0.0312148	0.00411854	0.00237371	-0.0364466	-0.0501728
535	2411	C	C3	H	H2	0	SC	LQD	0	0.0703143	-0.0466778	-0.0458151	0.010834	-0.0364622	0.0498258	0.0122451	-0.00704323	0.016359	-0.00298044	-0.0553484	-0.0190985	0.0264695	0.0483297	0.0127893	-0.00206076	-0.0418148	-0.00812235	-0.00685197	-0.000759979
536	2442	H	H2	C	C3	0	IVC	LQD	0	0.03537	-0.0703417	0.0716059	0.0708783	-0.021461	-0.0558745	-0.0192386	0.00492038	0.0174792	-0.00237232	-0.0704273	0.037645	0.04242	0.0383575	-0.0111524	-0.03296	0.0452645	-0.0338376	0.0290475	0.0224307
538	2478	H	H3	C	C3	1	IVC	LQD	0	0.102779	-0.0784193	0.0182291	0.0233199	0.0102844	0.0175857	0.0471922	-0.0111009	0.0349234	-0.023252	-0.0885268	-0.0509372	0.0475127	0.0551078	0.0108723	-0.00703472	-0.0492762	0.0163007	0.0115397	-0.0224916
539	2414	C	C3	C	C2	0	SC	SD	0	-0.0170255	0.138705	-0.023099	0.0210618	-0.0939758	0.0449906	-0.0328152	-0.0207001	0.0691455	0.081035	0.0291223	0.0191727	-0.0177056	0.0388358	-0.0155932	0.0149374	-0.0170707	0.0772225	-0.0335159	0.03796
540	2419	C	C2	C	C3	0	IVC	LQD	0	0.105809	-0.0374719	0.00399015	0.0702468	0.0113915	0.0602564	0.00722179	0.0286661	0.0336114	0.0277345	-0.100577	-0.0366977	0.0227317	0.00545764	0.0232269	0.010243	-0.0461041	0.0123773	-0.0034797	0.00976917
541	2416	C	C3	H	H4	1	IVC	LQD	0	0.0819945	-0.0727492	0.00558277	0.0206076	-0.0788699	-0.0404342	-0.0285796	0.024277	-0.00700349	0.00915267	-0.0348073	-0.0447869	-0.00209016	0.0660391	-0.00959438	-0.0347589	-0.0478006	-0.0054496	-0.0431948	-0.0394932
542	2484	H	H4	C	C3	1	SC	LQD	0	0.0983336	-0.0675768	-0.0489038	0.000434716	0.0587872	-0.0348956	-0.00586738	0.0194367	0.00849622	-0.0346711	-0.0880187	-0.0169748	-0.00386981	-0.0392586	0.0467931	-0.00632595	-0.0227851	-0.00265584	-0.0329214	0.00623988
543	2417	C	C3	H	H1	1	IVC	LQD	0	0.0525799	-0.114057	0.0515069	0.0156032	-0.0932215	-0.000369603	-0.0160185	-0.0354633	0.00959125	0.0131397	-0.071842	-0.0318091	0.0110581	0.0706277	-6.947e-05	-0.0104784	-0.075766	0.00960945	-0.0269156	0.00154056
544	2453	H	H1	C	C3	1	SC	SD	0	0.0193582	0.0613926	0.0463648	-0.0548192	-0.0395527	0.0163759	0.00963287	0.00268225	0.0342429	0.0607147	0.0639569	0.00273925	-0.0229297	-0.00412063	-0.027813	-0.0401678	-0.00254007	0.0352132	0.0653826	0.00824043
545	2420	C	C2	H	H1	0	IVC	SD	0	0.0356307	0.0944809	-0.00731475	-0.049031	0.0349479	0.0225489	0.0235059	0.00955655	-0.0689902	0.0333902	0.11196	-0.139223	0.0968884	-0.0564617	-0.0172759	-0.0856301	-0.0267829	-0.0281357	0.0207008	0.0838565
546	2468	H	H1	C	C2	0	SC	LQD	0	0.0612094	-0.0863976	0.00773966	-0.0278293	-0.0989113	-0.0152774	-0.0251825	-0.0323696	-0.00310884	-0.0145099	-0.0876085	-0.0539542	0.00625742	0.0575546	0.00107231	0.0131204	-0.0320166	0.000315148	-0.0401259	-0.00682366
547	2421	C	C2	H	H2	1	IVC	SD	0	0.0164044	0.102582	-0.00311061	0.076158	0.0583503	0.0534952	0.00803718	-0.0876466	0.0180138	-0.00762839	0.152936	-0.0676508	0.0445521	-0.00954519	-0.00444635	0.0509212	-0.00269769	0.000341592	0.0108367	-0.0126425
548	2440	H	H2	C	C2	1	SC	SD	0	0.0586342	0.0967126	-0.056703	0.0113268	0.0514545	-0.0388874	-0.0256293	0.0107399	0.0408849	0.0222426	0.00897928	-0.0397191	-0.0476068	0.0455619	-0.0204328	-0.0802277	0.0478568	0.0436584	-0.0115881	0.0191574
549	2422	C	C2	H	H4	1	SC	LQD	0	0.0954674	-0.0307594	0.00553517	0.0421083	0.078155	0.0466658	-0.031652	0.00709783	0.00314697	0.0218821	-0.130953	-0.00154111	0.00825437	-0.066639	0.0260862	0.0212928	-0.0230371	0.00229281	0.00319862	-0.0186343
550	2483	H	H4	C	C2	1	IVC	SD	0	0.0336215	0.0864424	-0.122932	-0.026148	0.0102354	-0.0174403	-0.0131781	0.0185323	-0.0107964	-0.0283303	0.171087	-0.106142	-0.058653	0.0339363	0.0450574	-0.0178422	0.0527216	-0.0166283	0.0126021	-0.030881
551	2423	C	C2	H	H3	0	SC	SD	0	0.0215547	0.10837	-0.00739256	-0.03595	-0.0322166	0.0574516	0.0435735	0.0577127	0.00507038	0.0618107	0.0691459	0.00104653	-0.0272838	-0.0716943	-0.00569485	-0.0363793	-0.023594	0.0395803	0.0065529	-0.000522359
552	2482	H	H3	C	C2	0	IVC	LQD	0	0.0893199	-0.0385155	-0.0439501	-0.010414	0.0301365	0.0501025	0.00681989	-0.0502016	0.0183746	-0.0590261	-0.0573976	-0.051603	0.0269606	0.0418332	0.0125075	0.00893647	-0.0564111	0.0304821	-0.00814871	-0.0223717
553	2441	H	H2	H	H4	1	SC	LQD	0	0.0671663	-0.0759126	-0.00336893	0.032463	-0.0830587	0.00894264	-0.0288976	0.00432586	-0.0250033	-0.00443648	-0.0666384	-0.0204407	0.0438545	0.0527868	0.0112031	0.0168313	0.0149138	0.00266356	-0.0139376	0.00962653
554	2603	H	H4	H	H2	1	IVC	SD	1	-0.521175	-0.0536664	-0.0530178	0.0100556	-0.022896	-0.037202	-0.11104	0.0539241	0.0216414	-0.0407831	0.0974532	0.186326	-0.0167018	-0.0103133	-0.0393894	-0.0469305	-0.0827604	-0.0627188	0.00325994	-0.058595
555	2452	H	H1	H	H2	0	IVC	SD	0	0.0494249	-0.0281506	-0.047916	-0.0828133	-0.0604682	-0.0113822	0.0493915	-0.020063	0.0115869	-0.0164398	0.0727656	-0.0436789	-0.0411797	0.0203189	0.061941	-0.0177379	-0.00192739	-0.0256134	0.0796148	-0.0103785
556	2566	H	H2	H	H1	0	SC	SD	0	-0.042814	0.12046	0.0804265	-0.00314453	-0.0752484	-0.0683863	-0.0248642	-0.0446953	0.017469	-0.00376331	0.0284128	0.0709617	-0.0882947	0.0391822	-0.113266	0.0202159	0.0169947	0.0113071	0.0628263	0.040911
557	2469	H	H1	H	H2	0	SC	SD	0	0.0284926	0.0463446	-0.0564745	-0.0844888	-0.00572033	0.0284875	0.0166119	-0.0155609	-0.0927305	-0.0280182	0.0311036	-0.0802668	-0.0361363	0.0306159	-0.0353203	-0.0716077	-0.0195594	0.00619181	0.00922015	-0.0512795
558	2491	H	H2	H	H1	0	IVC	SD	0	-0.022405	0.0964467	0.0449523	-0.0610114	0.0467972	-0.010048	-0.0133285	-0.0244749	0.0289496	-0.000476051	0.176562	-0.0725918	0.10889	-0.0865413	-0.0258623	-0.0200915	-0.0702968	-0.0485053	-0.0255704	0.0630591
561	2564	H	H2	H	H4	1	SC	SD	0	-0.0482615	0.168162	0.0394556	-0.0249257	0.109983	-0.0645437	0.0121878	-0.0642699	-0.00539521	-0.0924695	0.196366	0.0431958	0.0166322	-0.0876181	-0.0282711	-0.00779358	0.062269	0.0357811	0.0326218	0.0342632
562	2579	H	H4	H	H2	1	IVC	LQD	1	-0.555688	-0.0891943	-0.00238163	0.0455036	0.00439376	0.0509824	-0.0571411	0.0339433	0.0537824	0.00248446	0.0628472	0.144562	0.111637	0.0795461	-0.0141036	-0.0523633	0.0196758	-0.0492997	0.0140062	0.0287483
564	2713	H	H1	H	H4	1	SC	LQD	0	0.0505807	-0.0953167	0.0392468	-0.0610387	-0.000673456	0.0199108	0.00779004	0.0415361	0.0144623	-0.0635996	-0.0858186	-0.0250587	0.0332291	0.0399622	0.0440199	0.0015305	-0.049052	-0.00723481	-0.0305174	0.00578576
565	2602	H	H4	C	C1	0	IVC	LQD	1	-0.511987	-0.0835467	-0.0039077	0.0179069	-0.0149402	0.0540412	-0.12052	0.0626822	0.0727705	-0.0107257	0.0638749	0.105301	0.11738	0.0554329	-0.00489221	-0.0447194	-0.0591013	-0.0881723	-0.00979256	0.0300449
566	2751	C	C1	H	H4	0	SC	SD	0	-0.023679	0.0153786	0.0019592	-0.00315812	-0.0975592	0.0508226	-0.0108008	-0.046032	-0.00715261	-0.00639614	0.107114	0.0204796	-0.133711	0.134766	0.0957448	0.0450142	-0.00493615	0.016061	0.0537429	0.0396527
567	2610	H	H4	H	H1	1	IVC	LQD	0	0.0694903	-0.103273	-0.036018	-0.060232	0.0409092	0.0383325	0.0479559	-0.0160905	-0.0426155	-0.00214388	-0.09743	-0.0153349	0.0669943	0.0634842	0.0509106	0.0233621	0.0261374	0.010537	-0.0344569	0.00848324
568	2759	H	H1	H	H4	1	SC	LQD	0	0.089031	-0.124044	-0.0846424	-0.0654933	0.00665128	0.0457839	-0.0129938	-0.0694288	-0.0121408	0.0255414	-0.092675	0.00724208	0.00684623	0.0198864	0.0443208	-0.00951049	-0.0365711	0.0229718	-0.0178449	0.0322141
569	2611	H	H4	C	C4	0	SC	SD	0	0.0338318	0.0640313	-0.0323535	0.0493718	-0.0962362	-0.0196175	0.0520042	-0.000458276	-0.0640386	0.0157341	0.0564495	0.0576524	-0.0413385	0.0445202	-0.0541509	0.0646074	0.0580348	-0.0166726	-0.00572545	0.028859
570	2664	C	C4	H	H4	0	IVC	LQD	0	0.0954957	-0.0799264	0.0219897	0.00575461	0.00563586	-0.0316448	0.0219295	0.0253974	0.0416551	-0.0397819	-0.142558	0.0238613	-0.0526291	-0.00889727	-0.0259868	-0.0496937	-0.0359171	0.0162515	0.0201142	0.016137
571	2622	H	H3	C	C1	1	IVC	LQD	0	0.102768	-0.0719323	0.0385539	0.018683	-0.0619321	-0.0109841	-0.0140786	0.020422	0.0341931	0.0149378	-0.159261	0.00592453	-0.0239229	-0.0408111	0.0120163	-0.000397039	-0.0303117	-0.0166982	-0.0139842	0.00206877
572	2706	C	C1	H	H3	1	SC	SD	0	0.0443281	0.119136	-0.0141002	0.0513367	-0.0292168	-0.000637909	0.000574278	0.0450765	0.0131593	-0.000434321	0.0984486	-0.0978149	0.014811	-0.019263	-0.000142328	-0.0186994	-0.017498	0.0582556	-0.035412	0.0110683
573	2623	H	H3	C	C2	0	IVC	SD	0	0.00591884	0.0829884	0.0466774	0.0752531	-0.0576785	0.00115685	-0.0274479	-0.0175932	-0.029624	-0.0329586	0.0194969	0.0665262	-0.0792696	-0.00601715	-0.0776675	0.0209566	-0.0351971	-0.0025208	0.0284198	0.0205903
574	2745	C	C2	H	H3	0	SC	SD	1	-0.247834	0.0324295	0.146115	0.152112	0.0290763	-0.138762	-0.0179827	-0.0289656	-0.0553568	-0.045065	0.105489	0.0199962	-0.0423807	0.0915252	-0.100343	0.135968	0.0501987	0.00802274	-0.0306489	-0.0370035
575	2633	C	C2	H	H2	1	IVC	LQD	0	0.0972992	-0.0240567	-0.01004	0.0520047	0.0754708	0.0301207	-0.040062	-0.00970459	0.00632063	0.00118173	-0.0858119	0.0109293	0.0150442	-0.0459401	0.0118622	-0.0289718	-0.000638098	-0.0175374	0.0515562	-0.00630217
576	2863	H	H2	C	C2	1	SC	SD	0	-0.0151852	0.11094	-0.00846444	-0.0299943	0.0475987	0.0233634	0.06347	-0.0563419	-0.0200526	-0.0602494	0.10555	-0.00193516	-0.0200574	-0.0303144	-0.0191814	0.0273752	-0.0320551	-0.00839057	0.0353147	-0.0172609
577	2634	C	C2	H	H1	0	SC	LQD	0	0.0669508	-0.00841021	0.0401919	0.0632117	0.11598	0.00597192	-0.0173397	-0.0192587	-0.0320749	-0.0484246	-0.0831527	0.0171468	-0.00515834	-0.013932	-0.0188782	0.0365963	-0.0182976	-0.0217397	0.0163397	0.0204236
578	2846	H	H1	C	C2	0	IVC	SD	0	0.0336993	0.0955613	-0.0505533	-0.127227	0.0135151	-0.0911096	0.0010234	0.0161659	0.0374924	0.0186377	0.132515	-0.116663	-0.0562393	0.0163235	0.035156	-0.0111464	0.00475266	-0.0219552	-0.0386033	-0.0507879
579	2635	C	C2	H	H4	1	SC	SD	0	0.0423728	0.126265	-0.0457721	0.0513903	0.0379179	0.0574471	0.00933646	-0.0442566	0.000867731	-0.0351902	0.160792	-0.1107	0.0610814	-0.0354844	-0.0263391	0.00773872	-0.0356005	-0.0129942	-0.02184	0.042214
580	2740	H	H4	C	C2	1	IVC	LQD	0	0.0961822	-0.0800608	-0.0278705	-0.00995409	0.0510343	-0.00570987	0.0242339	-0.0142429	0.0150243	-0.00395641	-0.0807228	-0.0402356	0.0141826	0.00822793	-0.0139767	0.0189073	-0.0301171	-0.0046678	0.020799	-0.0198524
581	2645	C	C4	H	H3	0	SC	SD	0	-0.0815777	0.0834198	0.103256	-0.0788022	-0.00323389	0.0278595	-0.0104772	-0.00461959	0.0226529	-0.0450899	0.132316	0.141098	-0.00318527	-0.0723798	0.00996666	-0.0101792	-0.0364101	0.0403014	0.0255766	-0.0712038
582	2650	H	H3	C	C4	0	IVC	SD	0	-0.0469167	0.081004	0.0923984	-0.0574868	-0.00604364	-0.0271633	0.0319929	-0.02162	0.123934	-0.0162354	0.180112	-0.0455757	0.0865192	-0.0635754	-0.0436953	0.0138662	-0.00285925	-0.0149946	0.0393599	0.0642029
583	2646	C	C4	C	C3	0	IVC	SD	0	-0.0750396	0.148444	0.0920001	-0.0726009	0.111409	-0.0382387	0.0403122	-0.0459882	-0.0293105	0.0401373	0.158839	0.00303775	0.0500917	-0.0428547	-0.00625932	0.026314	0.0214144	0.00256663	0.0345522	0.0251497
584	2768	C	C3	C	C4	0	SC	LQD	0	0.0512968	-0.0418711	-0.0222401	0.05635	-0.0205902	0.0745162	-0.0329816	-0.0694526	0.00114331	-0.00863664	-0.0260322	0.0382569	0.0545206	0.0524286	-0.00255643	-0.00511876	-0.022797	0.0226463	0.0401997	0.00658325
585	2647	C	C4	H	H4	1	SC	SD	0	-0.0314503	-0.0359832	0.00277908	-0.0871463	-0.135273	0.00901293	0.0204317	-0.084115	-0.0272908	-0.0282658	0.0939689	0.0900474	0.0489003	0.0912268	0.0189422	0.0312241	0.0262552	-0.0570098	-0.00892925	0.0128278
586	2738	H	H4	C	C4	1	IVC	LQD	0	0.0750879	-0.071964	0.0658826	-0.00543183	0.00208321	0.0148598	0.0531795	-0.0246256	0.0455954	-0.0513559	-0.0943164	-0.0714121	0.0474487	0.0741962	0.0054094	0.0285102	-0.0270182	0.0400183	-0.0154177	-0.0530418
587	2649	H	H3	H	H1	1	IVC	SD	0	0.0291222	0.0772665	-0.0524714	-0.0147101	0.0229999	0.0127682	-0.0197212	-0.0380143	-0.0157681	-0.0126369	0.126377	0.0397516	-0.028475	-0.0374382	0.0142987	0.0222697	-0.0341956	0.0173756	0.0380033	-0.0219158
588	2828	H	H1	H	H3	1	SC	LQD	0	0.093817	-0.140687	-0.0153081	-0.0312575	0.0730595	-0.0686753	0.0053965	-0.0137687	0.0162669	-0.0798225	-0.118893	-0.0183854	-0.013374	0.0479981	-0.0095112	-0.0463228	-0.0432095	-0.0300433	0.019436	-0.0145284
589	2651	H	H3	H	H2	1	IVC	LQD	0	0.0968999	-0.0808691	-0.0121185	0.0030723	0.0631335	-0.0304335	0.0146808	-0.0541183	0.0543204	-0.00293319	-0.117076	0.000526177	-0.0118486	-0.0109135	-0.0312032	-0.0121385	0.0294572	-0.00468875	0.0565283	-0.0153109
591	2652	H	H3	C	C3	1	SC	LQD	0	0.0740333	-0.0775377	0.0176241	0.000710357	-0.0170319	0.0495436	0.034722	-0.0334359	0.0208972	-0.00612364	-0.0508802	0.0202242	0.0209	-0.00953484	0.0247576	0.0399217	0.0247633	-0.0119104	0.0057009	0.000569323
592	2764	C	C3	H	H3	1	IVC	SD	0	-0.0498714	0.128682	0.0420561	-0.0232484	-0.0938633	-0.0315764	-0.0255328	-0.00266306	0.0120508	0.0462139	0.0330756	0.0265157	-0.046433	0.0724367	-0.0772457	-0.00141156	0.0314939	0.00482137	0.0180511	0.0235238
593	2653	H	H3	C	C1	0	IVC	LQD	0	0.0555437	-0.0499377	0.0540702	0.00153933	0.0095397	0.0187571	-0.045226	-0.0881116	-0.0500364	0.026663	-0.086704	0.0261638	0.0113747	0.00651407	-0.000509651	0.0172763	-0.0168438	0.00873828	0.0175792	0.0194727
594	2920	C	C1	H	H3	0	SC	SD	0	-0.162402	0.0510301	0.191611	-0.11789	0.0387387	-0.00596277	0.0490325	0.0522222	-0.0571763	0.0190861	0.0917356	-0.0943147	0.0946226	-0.00286736	-0.00741531	0.0219152	0.0352754	-0.00843668	0.0124948	-0.0103016
597	2661	C	C4	H	H2	0	SC	LQD	0	0.0859177	-0.0859994	0.00735291	0.00578397	-0.0455978	0.00764335	-0.0377975	0.0169835	-0.00608631	0.00759811	-0.135385	0.023532	-0.0359661	-0.00715079	-0.00246818	-0.0154759	-0.0210404	0.00897692	-0.00540074	0.0309533
598	2879	H	H2	C	C4	0	IVC	SD	0	0.0346995	0.09033	-0.00874874	0.0272671	-0.0126113	-0.00848185	-0.0153335	0.0574372	0.0183721	-0.0257397	0.133997	-0.0929654	0.031842	-0.00482525	-0.0241787	-0.0252173	0.0107531	0.0301022	-0.0146994	0.0136386
599	2663	C	C4	H	H3	0	SC	LQD	0	0.0635563	-0.0749651	0.0479147	-0.0116162	-0.00324501	0.0171091	0.0381109	-0.00559418	-0.0149795	-0.0481384	-0.102403	0.0112437	0.00764613	-0.0212091	0.0245242	-0.0100416	-0.0376248	-0.00333353	0.0180018	0.00621561
600	2692	H	H3	C	C4	0	IVC	SD	0	-0.0126485	0.122319	0.0754099	-0.0298576	0.000642327	-0.0286449	0.00591126	0.0616417	0.0466587	-0.0491682	0.109126	-0.135819	0.0415387	-0.0646274	-0.0405727	0.0239402	-0.0311479	-0.065049	0.00920044	0.0213036
601	2694	H	H3	C	C1	1	IVC	SD	0	0.0256201	0.107778	-0.00948349	0.0370599	-0.0971598	-0.00680162	-0.0347776	0.0424262	-0.0319742	-0.00767075	0.0583007	0.0208526	-0.0527872	0.0108519	-0.0232244	0.0794725	-0.0478961	0.00725724	-0.0192525	0.0129794
602	2812	C	C1	H	H3	1	SC	LQD	0	0.0737581	-0.0568301	-0.0235831	0.0316114	0.0291043	0.0191667	-0.0951053	-0.0066998	-0.0474871	0.0178136	-0.08654	0.0332885	-0.00729218	-0.024229	-0.0080131	-0.0191151	0.000872715	-0.05128	0.0272739	-0.00399903
603	2695	H	H3	C	C2	1	IVC	SD	0	0.0228046	0.107196	-0.0532301	0.0153762	0.0309455	0.0238789	-0.0178417	-0.00277055	-0.0355337	-0.0574027	0.156477	-0.0904484	0.0437669	-0.0242517	-0.0137931	-0.00694564	-0.0115848	0.00218037	-0.0154518	0.0220671
604	2840	C	C2	H	H3	1	SC	SD	0	0.054383	0.0683787	-0.102338	0.0150768	0.00414161	0.0403973	-0.0305157	-0.0120431	-0.0499869	0.00285973	0.111713	-0.108834	0.0680436	0.0329175	-0.00253957	-0.0528837	0.0676693	0.0383718	-0.0374701	-0.0236734
605	2696	H	H3	H	H1	1	IVC	SD	0	0.0748896	0.0472266	-0.0148812	0.0510761	-0.0128777	-0.0950321	0.0368504	0.0631291	0.00840671	-0.0604215	0.0975351	-0.134326	0.0180933	-0.0613443	-0.037518	-0.0216838	-0.0198587	-0.0116614	-0.0292151	0.0319838
606	2718	H	H1	H	H3	1	SC	LQD	0	0.0734724	-0.119838	-0.0222679	-0.0306832	-0.0265555	0.0439335	0.0258976	-0.00270719	-0.0203491	-0.0441329	-0.0815892	0.0185491	0.0391547	-0.0169237	0.0597893	-0.000802553	-0.0408525	-0.0322638	-0.0167576	-0.00203255
607	2702	H	H2	C	C1	0	IVC	LQD	0	0.0870513	-0.0880084	-0.026652	0.00697329	-0.0104052	-0.00294743	-0.0476923	-0.0424068	0.0066125	0.0400543	-0.114237	-0.0173544	-0.0137972	0.0218935	-0.00451366	-0.00870883	0.0214523	-0.0237327	-0.0210146	0.0130551
608	2704	C	C1	H	H2	0	SC	LQD	0	0.112241	-0.1074	-0.0175687	0.0310406	0.000186227	0.0200843	0.026838	0.0374033	0.0566256	0.00769943	-0.1509	0.0104659	-0.0144072	-0.120228	0.0270873	0.023609	0.0281212	-0.0170043	-0.0195675	-0.0558779
609	2703	C	C1	H	H4	1	SC	LQD	0	0.115851	-0.0889125	-0.00421149	0.0220593	0.00827426	-0.01778	0.0343734	0.0309227	0.0376455	0.00642975	-0.114405	0.0254671	-0.0161548	-0.0559449	0.024232	-0.023186	-0.0107899	-0.0137795	0.00520449	-0.0234908
610	2771	H	H4	C	C1	1	IVC	SD	0	0.0424441	0.0619381	-0.0420569	0.0311239	-0.0522156	-0.0350759	0.04471	0.00787503	0.0218553	-0.0131445	0.0919063	-0.0473643	-0.00166676	-0.0809448	-0.0206172	-0.0336042	0.0215892	-0.00410188	0.0252937	0.0302371
611	2714	H	H1	C	C3	1	IVC	SD	0	0.0306102	0.0835825	-0.0613863	-0.0568075	0.0238161	-0.00765787	0.0278285	-0.00173569	-0.0498462	-0.00298662	0.117687	-0.0743961	0.00283513	-0.0200869	-0.00920848	0.00622106	-0.0166353	0.00524026	0.00768372	-0.00473216
612	2875	C	C3	H	H1	1	SC	SD	0	0.0515458	0.118878	-0.0912259	-0.0209381	0.0222739	0.0556567	-0.0133518	-0.0197741	0.0268004	0.00153378	0.0680693	-0.0178832	0.0303409	0.0142362	0.0345602	-0.0211553	0.00555899	0.0722627	-0.0237787	-0.00939161
613	2716	H	H1	C	C1	0	SC	LQD	0	0.0742169	-0.128253	-0.0277333	-0.0246049	-0.102637	0.0113353	-0.0229244	-0.040003	-0.0401758	-0.0107358	-0.102768	0.00286827	0.00645087	0.0101752	0.0167993	0.015729	0.00520134	0.0023243	-0.0112696	0.0151895
614	2921	C	C1	H	H1	0	IVC	LQD	0	-0.0244606	-0.0906927	0.133879	-0.170628	0.00827434	0.0488295	0.0607555	0.0445179	-0.0303625	-0.00528453	-0.0281537	-0.0579411	0.062799	0.028049	0.0153784	-0.0343024	-0.00232833	-0.00578399	0.0368958	-0.0317385
617	2725	H	H2	C	C1	1	IVC	SD	0	0.000393588	0.120449	-0.0498441	0.0269901	-0.0429914	0.0400858	-0.0505015	-0.0839707	-0.0254908	-0.0365975	0.0771678	0.0831371	-0.0491011	0.0148085	-0.0270243	0.0452336	-0.0205028	-0.0152544	-0.0210433	0.0264153
618	2748	C	C1	H	H2	1	SC	SD	0	-0.056165	0.142733	-0.0537758	-0.0853856	0.0218864	0.0766919	-0.0388453	0.00238259	0.0434128	0.0520926	0.208071	-0.0732663	-0.0296423	0.0719385	0.178283	0.0486549	0.000601074	-0.0480666	0.0799842	-0.0614527
619	2727	H	H2	C	C3	1	SC	SD	0	0.0210255	0.100051	-0.031306	-0.0629781	0.0152353	0.0110818	-0.0439121	-0.01175	0.0262061	0.0170075	0.101129	-0.0568088	-0.0227432	0.0276519	-0.0314445	0.0670502	0.0127075	-0.016304	-0.01059	-0.0585713
620	2878	C	C3	H	H2	1	IVC	LQD	0	0.0759803	-0.0605195	0.0309966	0.00309162	0.058434	-0.00180653	0.000503942	-0.040005	0.0313185	-0.0152715	-0.116717	0.00605837	-0.0281216	0.00248867	-0.0248306	-0.018193	0.0127769	-0.00857678	0.0333489	0.00471885
621	2728	H	H2	H	H1	1	SC	LQD	0	0.0866776	-0.0977894	-0.00434578	0.0173692	-0.0720611	-0.0252319	-0.0107119	-0.042781	0.036946	0.00171612	-0.0682532	-0.0297324	-0.0139861	0.0783147	-0.0459121	0.0170186	-0.00602753	-0.0105735	-0.00236706	-0.0258245
622	2763	H	H1	H	H2	1	IVC	SD	0	0.0903788	-0.00295474	-0.105819	-0.0716334	-0.0144472	-0.0525829	-0.011157	-0.0354521	0.0015304	-0.00946303	0.0259143	0.0196247	-0.0915054	-0.0386849	-0.0324255	0.0119064	-0.0391795	-0.00966078	0.0269846	0.00953947
623	2742	H	H4	C	C3	1	SC	LQD	0	0.073809	-0.102997	-0.0191894	0.0168672	-0.0571534	0.0290766	0.066301	-0.0244186	0.000329337	0.0197516	-0.0637153	0.0375811	0.0258988	0.0821735	-0.00878418	0.0344836	0.0195937	0.017272	-0.0188132	0.0377774
624	2766	C	C3	H	H4	1	IVC	LQD	0	0.045941	-0.0601355	-0.00196581	0.0372783	-0.0800451	0.0582924	-0.0201016	-0.0414966	0.0307834	-0.00493731	-0.0435829	-0.0194722	0.0235378	0.0825269	-0.0253915	-0.0129046	-0.00943742	0.0376829	0.0101511	-0.0176754
625	2776	C	C4	C	C1	0	SC	LQD	0	0.0346278	-0.0315892	0.0932753	-0.0229473	0.016557	0.0847897	-0.02692	0.0317177	-0.0166599	0.00224672	-0.0462254	0.0330048	0.0477776	0.0039715	0.0290608	-0.00827777	-0.0382816	0.0279801	0.018673	0.0157247
626	2922	C	C1	C	C4	0	IVC	LQD	0	-0.0907637	-0.0571651	0.175055	-0.129959	0.0351599	0.0511263	0.0406055	0.0652254	-0.0331664	0.000484796	-0.0216704	-0.0514767	0.0293735	0.0166687	-0.00646667	-0.0689797	-0.00967601	0.0151082	0.041365	-0.0188848
627	2785	C	C1	C	C4	0	SC	SD	0	0.0189122	0.0618884	-0.0847548	-0.0304961	0.0101239	0.0529829	-0.00647737	0.00520909	0.0208275	0.0286904	0.09718	0.0519172	-0.00469456	-0.0823715	0.0512201	-0.0454131	0.0017279	0.0659032	-0.0287737	-0.0133123
628	2939	C	C4	C	C1	0	IVC	SD	1	-0.491765	-0.0432157	-0.0159852	-0.0425678	-0.0449687	0.0333203	-0.0742731	0.0624478	0.0292044	-0.0482498	0.107909	0.218493	0.0770522	-0.0199158	-0.00551928	-0.0537277	-0.0224417	-0.0170397	-0.0100047	-0.0618629
629	2799	H	H2	C	C2	0	IVC	SD	0	0.0446711	0.0931011	-0.105578	0.00220634	0.00170792	0.0488876	-0.0323757	-0.00881599	0.00382301	-0.00865693	0.0950316	0.0284523	-0.0268594	-0.0631349	0.0218715	0.00306783	-0.0386185	0.0619114	-0.0369213	-0.0177038
630	3024	C	C2	H	H2	0	SC	SD	0	0.0653362	0.057263	0.0061742	0.0397738	-0.0785232	-0.0195647	-0.0154979	0.0187731	0.0176726	0.0272914	0.0280527	-0.0177951	-0.034108	0.0451147	-0.042868	0.0270361	-0.0430379	-0.00477282	-0.0233769	-0.0096611
631	2800	H	H2	H	H1	0	SC	LQD	0	0.114729	-0.0956127	-0.0339638	-0.0297791	-0.00593263	0.0388409	0.0730847	0.0411953	0.00523488	0.0146404	-0.0923733	-0.0133848	2.15847e-05	0.0061887	0.00810374	-0.0348075	-0.0368366	0.0188397	0.0288247	0.0154197
632	2993	H	H1	H	H2	0	IVC	LQD	0	0.115099	-0.100496	-0.0278416	-0.00911697	-0.00171736	-0.023434	0.0322101	0.0350523	0.07573	-0.034927	-0.0881635	-0.0374032	-0.0324367	0.00744195	-0.00128619	-0.0325347	-0.0222205	-0.0116815	-0.0241991	0.00205514
633	2802	H	H2	C	C4	1	IVC	LQD	0	0.0371561	-0.102675	0.0510379	-0.065633	-0.0396562	0.051837	0.0483444	-0.0479487	0.0143048	-0.0590661	-0.0606241	-0.0273183	0.0455966	0.0983636	0.000801477	-0.036106	0.020362	0.026061	-0.013242	-0.027125
636	3016	H	H1	C	C1	0	IVC	LQD	0	0.073118	-0.138828	-0.032995	-0.0522796	-0.01318	0.0586717	0.0586516	0.0457061	-0.0253416	0.0121173	-0.118937	-0.00532792	0.0144716	-0.0042613	0.0591184	-0.0293598	-0.0335651	0.00397319	-0.0164114	0.00115521
637	2826	H	H1	H	H4	1	SC	SD	0	0.055106	-0.0027949	-0.063683	-0.0761415	0.00554127	-0.0916357	0.00157686	-0.0347981	-0.0365968	-0.0598467	-0.0569911	-0.0389676	-0.099781	0.0237921	-0.0669725	0.0125152	-0.0158429	-0.0546635	0.00375547	-0.0140046
638	2896	H	H4	H	H1	1	IVC	LQD	0	0.0536894	-0.078289	0.00561238	0.0737849	-0.0492939	-0.0375776	0.000894643	-0.0391741	0.0103618	-0.0541959	-0.0915787	0.0361027	-0.0596613	0.00836338	-0.11019	0.0146743	-0.0331103	-0.0063259	0.0648854	0.0139471
640	2852	H	H4	C	C4	0	IVC	LQD	0	0.0276103	-0.0961216	0.0583075	-0.0317329	-0.0535711	-0.0720017	-0.000282318	-0.0331003	-0.000450107	-0.0532439	-0.0993163	-0.0344859	-0.027354	0.0389131	0.00762844	-0.0551048	0.0298664	0.0222997	-0.0435279	0.00653431
641	2849	C	C4	H	H2	0	SC	LQD	1	-0.589267	-0.114541	-0.0846685	0.0502395	0.0362014	0.03028	0.0303551	-0.0411332	-0.063169	0.0286596	0.106138	0.217166	0.0699744	0.0425421	0.0234366	-0.0292063	0.0733032	-0.0548077	-0.0407674	-0.0237033
642	2861	H	H2	C	C4	0	IVC	LQD	0	-0.0202794	-0.018516	0.0660672	-0.0478821	0.0761814	0.0654176	-0.0520173	-0.0530176	-0.0238639	-0.121196	-0.0268484	-0.0140564	0.0671363	0.0768738	-0.0153257	-0.0132636	-0.0153851	0.015124	0.0339455	-0.0256309
643	2850	C	C4	C	C3	1	IVC	SD	1	-0.589984	-0.0522364	-0.0901931	0.0255955	0.0163914	0.0188054	-0.0385433	-0.022466	0.0595939	-0.0456567	0.117405	0.199771	0.037093	0.0544327	-0.0344815	-0.029326	0.0553658	-0.0426912	-0.00791718	-0.010689
644	2932	C	C3	C	C4	1	SC	LQD	0	0.0198394	-0.0571206	0.0841893	-0.0145014	0.104688	0.0790617	-0.0191099	-0.0440771	-0.0309322	-0.0633634	-0.0477649	0.0168098	0.0744779	0.0883595	0.0182855	0.0247868	0.0175171	0.0692015	-0.00519817	0.0171121
645	2853	H	H4	H	H2	1	IVC	SD	0	0.0232424	0.101899	0.0167768	-0.0131138	-0.0247317	-0.00145027	-0.0112727	0.0395553	-0.00816276	-0.0128564	0.107498	-0.083345	-0.0174795	0.0103663	-0.038501	-0.0137187	0.0288252	-0.020962	0.00873414	-0.072021
646	2880	H	H2	H	H4	1	SC	LQD	0	0.0983072	-0.0851305	-0.0347267	0.00972376	-0.0155682	0.0130902	0.00661405	0.0235356	0.0319696	-0.0229353	-0.0564534	-0.0374174	0.0395409	0.0336649	0.0250052	0.0330007	-0.0011924	-0.00959934	-0.019572	-0.00889611
647	2855	H	H4	H	H1	1	SC	SD	0	0.0377711	0.0730854	0.0406136	-0.0654543	-0.0414054	-0.0874445	0.0172904	0.0217309	0.0588698	0.0331915	0.0714083	-0.132508	0.0545826	-0.00725746	-0.00835733	0.03579	-0.0140322	-0.0175988	-0.0257299	-0.0476125
648	3015	H	H1	H	H4	1	IVC	SD	0	0.0853695	0.0385584	-0.061167	-0.0686313	-0.0655714	-0.0387921	0.0683894	0.0433151	-0.0139071	0.0132359	0.146432	-0.0958939	-0.0972439	0.0233696	0.0618419	-0.0608222	-0.00181962	0.00853188	0.0185956	-0.0085638
649	2859	H	H2	H	H4	1	IVC	LQD	0	0.0896609	-0.0805779	-0.0377092	-0.0776969	0.0359743	0.00903465	-0.0112995	-0.0216223	0.0261619	-0.0351252	-0.0698259	-0.0372354	0.0498489	0.0675616	0.0193998	-0.00585808	-0.0486744	0.00504027	-0.00612329	-0.0151701
650	3001	H	H4	H	H2	1	SC	LQD	0	0.061653	-0.0934123	0.027345	0.0203	-0.0726185	-0.0202541	-0.0163265	-0.0418555	0.00220646	-0.0198786	-0.125972	0.0731073	-0.0249679	-0.0274165	0.00562015	-0.0325776	-0.0497248	0.00485132	0.00621179	0.00746581
651	2860	H	H2	C	C3	1	SC	SD	0	-0.000551014	-0.0336326	-0.0592335	-0.149845	0.0162888	0.010179	0.0460975	-0.0730768	-0.0696439	-0.0306651	0.0790257	0.053153	0.00426333	0.0138415	0.0178371	-0.0277716	-0.0378939	-0.0154365	0.00580388	-0.0127017
652	2928	C	C3	H	H2	1	IVC	SD	0	-0.012827	0.0775258	0.0375309	-0.0918757	0.0775496	0.0269558	0.00526435	-0.0161836	-0.0187966	0.053606	0.0765464	-0.0607998	0.0555351	8.11099e-05	-0.0443143	-0.0279898	0.00431056	0.0162454	0.0800955	0.0193006
653	2862	H	H2	C	C1	1	IVC	SD	0	-0.00348551	-0.00636467	-0.0362144	-0.117706	0.00473843	-0.024899	-0.0141437	-0.0721281	-0.005809	-0.0642099	0.0344034	0.0366461	-0.0366247	0.0585889	-0.0430861	-0.0253572	-0.0381091	0.0325424	0.0280771	0.0238867
654	2957	C	C1	H	H2	1	SC	LQD	0	0.101668	-0.0932492	-0.00156573	-0.0121092	0.00493596	0.0107833	0.0735528	0.0642522	0.0248018	0.0338244	-0.134179	0.0167062	-0.00408962	0.0015512	0.00635209	-0.0166247	0.0647194	0.00138165	0.00538892	0.0183464
655	2876	C	C3	C	C1	1	IVC	LQD	0	0.0777413	-0.0647571	0.00747238	-0.029437	0.056748	0.000696103	0.00300989	-0.00441225	0.0191779	0.000424744	-0.0967122	0.0120086	0.0259049	-0.0321631	0.0347781	-0.0246738	0.00487565	0.00240681	0.0328661	-0.00337638
656	2956	C	C1	C	C3	1	SC	SD	0	0.0122425	0.102385	-0.0506594	-0.10847	0.0151191	0.0140613	0.0456598	0.0134642	0.0278218	0.102198	0.0841959	0.00842792	-0.139271	-0.00920603	0.137441	0.0233943	0.0483371	-0.0469653	0.0492033	0.0255382
657	2881	H	H2	C	C1	1	SC	SD	0	0.0394062	0.0907662	-0.0417559	-0.000161818	-0.0389943	0.0361246	0.0105733	0.0306019	-0.0240182	-0.0585673	0.0784545	0.0676282	-0.0473077	-0.0191529	0.0160226	-0.00763825	-0.0136063	0.0228949	-0.0265154	0.010705
658	2919	C	C1	H	H2	1	IVC	LQD	0	-0.0107042	-0.052054	0.160303	-0.0564753	-0.0166572	-0.0529981	0.0238771	0.000441418	-0.058583	0.0946454	-0.117951	-0.0362882	0.0156784	0.0591878	-0.0387115	-0.00854395	-0.020137	0.0287983	0.0339563	-0.0220848
659	2929	C	C3	H	H4	1	IVC	SD	0	-0.0238305	0.0639774	0.0453951	-0.0696859	0.0606716	0.0230192	-0.0598716	-0.00964237	0.000752714	0.0282685	0.0807253	0.012167	0.0362108	-0.0370357	0.0223638	0.0401128	-0.0369435	0.0311384	0.0027399	-0.000411352
660	3029	H	H4	C	C3	1	SC	SD	0	0.0583835	0.0872373	-0.0551383	0.0030978	0.02464	-0.0131943	-0.0218914	0.0140732	-0.00255229	0.00775467	0.0701525	0.0374909	-0.0409841	-0.0851734	-0.0124235	0.0103712	-0.0198244	0.0449547	-0.00594465	-0.0155494
661	2931	C	C3	H	H1	1	IVC	LQD	0	0.0671559	-0.0146355	0.107558	0.0602621	0.0850723	0.00762493	0.0846665	0.066173	0.00353928	-0.00852063	-0.111623	-0.0762875	0.0434699	0.0853734	-0.0839181	0.0503673	0.0042618	0.0472828	0.0466065	-0.0718756
662	3005	H	H1	C	C3	1	SC	SD	1	-0.482326	-0.0152051	-0.0172554	-0.064984	-0.0424362	0.00201007	-0.00420359	0.0149212	-0.0220185	-0.0994656	0.146386	0.147727	0.0461707	-0.0102102	0.00388591	0.00301001	-0.0480703	-0.0667321	-0.0108421	-0.00293094
664	2994	H	H1	C	C4	1	IVC	LQD	0	0.0710323	-0.109198	0.0135171	-0.00906281	-0.0719607	-0.0224568	-0.00896653	-0.0365507	0.00134928	-0.050223	-0.105232	-0.0210676	-0.0412639	0.00305991	-0.0103837	-0.0112308	-0.0336453	-0.0039193	-0.0236255	0.00720654
666	3000	H	H4	C	C4	1	SC	LQD	0	0.112722	-0.037564	-0.0111026	0.0117845	0.0580617	0.0099548	-0.0341877	0.0164156	-0.0152511	-0.0054613	-0.0666497	0.0148678	0.0279694	0.00619927	0.046319	0.00469714	-0.0647725	0.020453	-0.0257293	0.0240595
667	2952	C	C1	H	H4	0	SC	LQD	0	0.0782647	-0.0202612	0.00855849	0.0614169	0.0405186	-0.00546841	-0.0722906	-0.00301237	-0.0485064	0.0331085	-0.114669	0.0392817	0.00655706	-0.0339754	0.0113179	0.011943	0.0518238	0.00329231	0.00522475	0.00117772
668	2998	H	H4	C	C1	0	IVC	LQD	0	0.0699787	-0.0671772	0.00830977	0.0701495	-0.0612291	0.0337014	-0.0548333	0.0175908	-0.0479296	0.0255348	-0.072491	-0.011003	0.00185543	-0.00197126	0.0290401	0.037775	-0.0302419	-0.0104687	-0.0447988	0.00217191
669	2953	C	C1	C	C4	0	IVC	SD	0	0.0151682	0.0856556	-0.0608616	-0.069494	-0.0302836	-0.0324999	-0.0444839	-0.00935791	0.0569175	0.0913934	0.0273502	0.0234912	-0.0584826	0.0489563	0.000442172	-0.0955983	-0.00598999	0.0536061	-0.0331712	0.0487732
670	3063	C	C4	C	C1	0	SC	SD	0	0.00243204	0.0321851	0.0534125	-0.139692	0.0811514	-0.0903206	0.0292456	-0.026405	-0.00980604	0.0246675	0.0795897	-0.0570922	0.0421387	-0.12571	-0.0230837	-0.0891666	-0.00489234	-0.0615493	0.0542024	0.0803372
671	2954	C	C1	H	H2	0	SC	SD	0	0.0972217	0.0179098	-0.0708084	0.0263997	0.0331225	-0.0296234	-0.00307924	-0.00225691	0.0241135	0.032424	0.0229412	0.0382271	-0.0434591	-0.0853362	0.0363566	0.0396443	-0.0196248	-0.00128365	-0.0247595	0.00566365
672	2986	H	H2	C	C1	0	IVC	LQD	0	0.114134	-0.0939281	-0.0451876	-0.000684745	0.0526541	0.00689947	-0.00980288	-0.00468207	0.0337632	0.00379729	-0.132126	0.000127938	0.00194383	-0.0141712	-0.00412514	-0.0121029	0.0228674	0.00120514	0.0347112	0.00266572
673	2984	H	H2	C	C4	1	SC	SD	0	0.0248407	0.0976649	-0.0117574	-0.0314661	-0.0213474	-0.0175166	-0.0319202	0.0929594	0.0365605	0.000478404	0.064357	-0.0283685	-0.0317768	-0.0297764	-0.0206494	-0.0504809	0.0379355	0.0200137	0.015026	0.0264293
674	3058	C	C4	H	H2	1	IVC	SD	1	-0.539336	-0.0711054	-0.0610011	-0.0464023	-0.00558582	0.0126752	-0.0416925	0.1104	-0.059003	0.0209519	0.109675	0.235213	0.0426504	-0.0405706	-0.00906761	-0.0485098	-0.0713412	-0.047407	-0.0565397	-0.0906926
675	2987	H	H2	C	C2	1	IVC	LQD	0	0.0432364	0.00975902	0.0936757	0.0382273	0.0145541	-0.00272956	-0.00880033	0.0405244	0.00918169	-0.0172068	-0.0762944	0.0277769	0.0152828	0.00916715	-0.0527256	0.00337254	-0.000472914	0.027297	0.0758454	0.000223822
676	3047	C	C2	H	H2	1	SC	SD	0	-0.0582532	0.155205	0.0768714	0.0439498	0.000444435	-0.013629	0.0625006	-0.0197925	0.0546478	-0.0128681	0.171535	-0.0273669	0.0161628	-0.0643422	0.000251533	0.0577735	-0.0282936	0.0199004	0.0204099	0.00779916
677	2992	H	H1	H	H4	0	IVC	LQD	0	0.103677	-0.116993	-0.0447782	-0.0437363	0.054067	-0.0160144	0.034468	0.00163647	-0.0508841	-0.00100185	-0.114518	-0.00379864	0.0292184	0.0141419	0.0161726	0.0097497	0.0279572	0.00565315	-0.00818147	0.0194131
678	3002	H	H4	H	H1	0	SC	SD	0	0.100619	0.0342316	-0.0221211	0.0254607	0.0459659	-0.123267	-0.00318856	0.00530872	-0.0291846	-0.0156241	0.0275406	-0.147415	0.00230448	-0.0551326	-0.0455924	0.00247969	-0.000612628	-0.0552449	0.00468998	-0.0447409
679	2999	H	H4	C	C2	1	SC	SD	0	0.0298915	0.0945899	-0.0367596	0.0599124	0.0332037	-0.0204199	-0.0291058	-0.041326	-0.0273719	-0.0240263	0.04093	0.042275	-0.0928097	0.0379433	-0.0625082	0.0239054	-0.0187079	-0.00633921	-0.0064759	0.0359745
680	3026	C	C2	H	H4	1	IVC	LQD	0	0.118396	-0.0547889	-0.0095618	0.0275464	0.0876549	0.0535695	-0.0414669	0.0287384	-0.00858589	0.0177674	-0.09495	-0.0534182	0.0332185	0.0196907	0.0114629	0.0219627	-0.0404466	-0.0242298	-0.0024155	-0.0206068
681	3006	H	H1	C	C1	1	SC	SD	1	-0.389838	-0.00810988	0.0224494	-0.0500862	-0.0579868	0.0202069	-0.0974033	0.0419508	0.0121814	-0.13365	0.111785	0.104155	0.112596	0.0301668	0.00633439	0.00983896	-0.0260875	-0.0636052	-0.0161206	0.0416017
682	3088	C	C1	H	H1	1	IVC	SD	0	0.0141886	0.122941	-0.0837804	-0.0632389	0.0231201	0.000270008	-0.0498821	0.0246224	0.0170805	0.054118	0.00678309	-0.0332968	-0.12206	-0.046965	0.0840178	-0.0166311	0.0874772	-0.0237544	0.00579576	-0.00377147
683	3018	H	H1	C	C4	1	IVC	LQD	0	0.0935289	-0.132	-0.0327888	-0.0200642	-0.00183631	0.0107953	0.0739137	0.0429358	-0.0127789	-0.025085	-0.125924	0.0298389	-0.0142863	-0.0599887	0.00574703	-0.022205	-0.00134467	-0.00598838	0.00610193	-0.0304866
684	3064	C	C4	H	H1	1	SC	LQD	0	0.109619	-0.100535	0.00971661	0.0395762	0.0134618	0.0108433	0.0178308	0.042449	0.0350145	0.0105939	-0.163975	0.0154725	0.0026292	0.00506123	0.00479417	-0.00799791	0.0630959	0.0221858	-0.00141403	0.0203408
685	3025	C	C2	C	C4	1	IVC	SD	0	0.0500451	0.0680343	0.0245965	0.0460539	0.040897	0.019854	-0.00527789	-0.0551242	-0.00856886	0.0234809	0.0916929	0.0295276	0.0493259	-0.0210102	0.00513787	0.0329566	0.0150231	0.0309487	0.032384	0.0181183
686	3065	C	C4	C	C2	1	SC	SD	0	0.0017476	0.147807	-0.0243916	-0.0637495	0.032281	0.00677529	-0.0394074	-0.003303	0.0472546	0.0121109	0.13749	-0.119007	0.0323715	-0.0051806	-0.0313289	-0.0406066	-0.0370209	-0.0187813	-0.00500813	-0.0110748
687	3027	C	C2	C	C3	1	IVC	LQD	0	0.0574942	-0.077286	0.063339	-0.00149195	-0.0626829	-0.0373391	-0.0428976	0.00397364	-0.0211146	0.0013415	-0.0979255	0.0028338	0.00640025	-0.00157703	-0.000495114	0.017319	-0.0520525	-0.0038263	0.00922955	0.0237085
688	3070	C	C3	C	C2	1	SC	SD	0	-0.0563425	0.0181594	0.0711134	-0.0221268	-0.0501474	0.0276919	0.0306864	-0.0555016	-0.079353	-0.0393275	0.0267204	0.0874627	0.00802204	0.0181477	-0.019719	-0.0236004	-0.033921	0.0249721	0.0181564	-0.0050276
689	3028	H	H4	C	C4	1	SC	SD	0	0.0406413	0.0268193	0.0199581	-0.030066	0.000474745	-0.134913	-0.0507859	-0.000120068	-0.0144176	-0.00636688	-0.00150864	0.0723003	-0.0992996	-0.0656308	-0.0742017	0.0242034	-0.0246808	-0.0231835	0.000933922	0.014328
690	3059	C	C4	H	H4	1	IVC	LQD	1	-0.555116	-0.0987251	-0.0317259	0.0178957	0.0384056	0.0504841	-0.0094259	0.027871	-0.0699115	0.0625423	0.088936	0.164142	0.136343	0.0907845	-0.00555601	-0.0513268	0.0590649	-0.0734982	-0.0144377	0.00678911
691	3030	H	H4	H	H2	0	IVC	LQD	0	0.102925	-0.0758473	0.0372935	0.0725462	-0.0226032	-0.10627	-0.0167565	0.0349898	-0.00225988	-0.0167604	-0.151102	-0.0061608	-0.0440197	-0.00350293	-0.0604594	-0.007271	0.0157917	-0.0253243	0.0430994	0.0132409
692	3169	H	H2	H	H4	0	SC	SD	0	0.0454114	0.0711262	-0.0498227	0.0290288	-0.00512296	-0.0384997	-0.0576463	-0.0276473	-0.0515509	-0.0460528	-0.00436252	0.0217342	-0.0762723	-0.012868	-0.0252222	-0.0495194	0.020421	0.0224865	-0.031454	0.0373438
693	3031	H	H4	C	C2	0	SC	SD	0	0.0380364	0.0157845	0.0538059	0.0281117	0.00590879	-0.0875319	0.0338155	0.051925	0.00998364	-0.0373909	-0.00271428	-0.025337	-0.0262915	-0.0714852	-0.0259682	0.0156106	-0.0165955	-0.0447987	0.0217594	-0.0245524
694	3051	C	C2	H	H4	0	IVC	LQD	0	0.0577814	-0.0398762	0.0965278	0.0952663	-0.0192136	0.014717	-0.0333244	-0.00829731	-0.0250634	0.0216252	-0.0762535	-0.0500078	0.051161	0.0536814	-0.0181372	0.0474425	-0.0598985	0.00408238	-0.0174396	-0.0185503
695	3032	C	C3	C	C4	0	IVC	SD	0	-0.0685063	0.0750762	0.0630458	-0.0601517	0.010037	0.00179448	-0.0490923	-0.109403	-0.0321635	-0.0227561	0.0729797	0.121134	0.0261249	-0.00890563	-0.00979548	-0.0278291	-0.0154249	0.0307941	0.0221016	0.00509003
697	3033	C	C3	C	C1	0	IVC	SD	0	-0.0873688	0.100994	0.111958	-0.10295	0.0922409	0.0355756	0.0371345	-0.0334874	-0.0372283	0.0452987	0.112816	-0.0848049	0.125023	-0.00852536	-0.0228656	0.0293988	0.0275069	-0.00835264	0.0341281	0.0387132
699	3060	C	C4	H	H1	0	SC	SD	1	-0.541357	-0.0385603	-0.0703509	-0.0333878	0.0170347	0.0298964	-0.0429876	0.0539817	-0.0181308	-0.0191822	0.0971171	0.220523	0.0364819	0.00820324	-0.0189473	-0.0394193	0.047696	0.00324259	-0.0124257	-0.0303675
700	3078	H	H1	C	C4	0	IVC	SD	0	0.0501297	0.031938	-0.0430538	-0.0274966	-0.114563	-0.0878433	0.00257198	0.0137279	-0.0380353	0.0143438	-0.0124777	0.0576105	-0.0967475	-0.00476944	-0.0669639	-0.0112294	-0.0441215	-0.00842632	-0.00571692	0.063957
701	3073	C	C3	H	H1	0	IVC	LQD	0	0.0771212	-0.10731	-0.0148813	-0.0666983	0.0555535	0.026686	-0.03645	-0.0308025	0.00725759	-0.0194497	-0.0649746	-0.052395	0.0682052	0.0366541	0.0590542	0.00652978	0.00608811	0.0133322	-0.00617957	-0.014274
702	3177	H	H1	C	C3	0	SC	SD	0	0.0702794	0.00214588	-0.0957364	-0.0590342	0.0148006	-0.0325297	-0.00299323	-0.0187168	-0.00258672	-0.027679	-0.00978113	-0.0331045	-0.134978	0.0158355	0.0303428	-0.0226995	0.0385684	-0.0401486	0.0200236	0.00296913
703	3087	C	C1	H	H4	0	SC	SD	0	-0.0540592	0.0590726	0.0332473	-0.0680251	-0.104535	-0.027845	-0.0394293	-0.00633736	0.0195679	0.0324153	0.100385	0.00576972	-0.156394	0.123113	0.0764829	0.0466574	-0.0326155	-0.0398164	0.0452824	0.0218949
704	3118	H	H4	C	C1	0	IVC	SD	0	-0.00910499	0.0598968	0.0387273	-0.108565	0.0471323	-0.0396104	0.00967984	0.0197131	-0.0355814	0.0520133	0.116994	-0.0797358	0.0710765	-0.0312709	-0.0287124	0.0046052	-0.0241593	-0.0410244	-0.000231791	0.0376725
705	3119	H	H4	H	H3	0	IVC	LQD	0	0.0260736	-0.0694416	0.0521678	-0.00133589	-0.0831901	0.0300367	0.0492186	-0.0308204	-0.0511107	0.0176437	-0.0734552	0.0254754	0.00724348	0.0713691	-0.0353373	0.0553593	0.0211284	0.0169865	-0.0247343	0.0381756
706	3221	H	H3	H	H4	0	SC	SD	0	-0.0664474	0.0156421	0.0722892	-0.170243	-0.0434447	0.00658992	0.0946725	-0.00477282	0.00657192	-0.0387456	0.0336444	0.0405142	0.0249798	0.0174652	-0.00140108	-0.0381318	-0.0233386	-0.0122913	0.0222658	0.00511337
707	3121	H	H4	H	H1	1	SC	LQD	0	0.0660148	-0.0986488	-0.00213482	-0.0288135	-0.0768981	0.0392331	0.048579	-0.00958827	-0.0394865	0.0332527	-0.0934318	0.0145748	0.0140713	0.0236888	0.0121842	0.0343993	0.0440354	-0.0184643	-0.027778	0.0350181
708	3174	H	H1	H	H4	1	IVC	LQD	0	0.059905	-0.0916296	0.0315551	-0.0731363	-0.0671684	-0.0140926	-0.016764	-0.0205402	0.0767668	0.0195786	-0.106014	0.0153242	-0.0236173	-5.25541e-05	0.0168565	-0.00193332	-0.0416757	-0.0296816	-0.0215654	0.0248689
709	3164	H	H2	H	H3	1	IVC	LQD	0	0.0888635	-0.0503069	0.0128213	0.00570907	0.0189992	0.0280632	0.051126	0.0532205	-0.0232473	-0.0154663	-0.116468	0.0381084	-0.00374718	-0.0243713	0.00308986	-0.0262151	-0.0143476	0.00319129	0.0518509	-0.00662299
710	3290	H	H3	H	H2	1	SC	LQD	0	0.11302	-0.0536109	-0.0240195	0.0270025	-0.00711508	0.0466394	0.00366416	0.0276062	0.0261426	-0.00165369	-0.115039	0.00976854	-0.00354377	-0.0452738	0.0343581	-0.00269577	0.0176643	0.0327903	-0.0130129	-0.0112725
711	3194	C	C4	H	H1	0	IVC	LQD	0	0.099397	-0.104492	-0.0389564	-0.0227507	-0.00902824	0.0360458	0.0625339	0.0403733	-0.0074265	0.0317395	-0.0986051	-0.0385354	0.0145163	0.0725803	0.0069875	-0.0351414	0.0249294	0.0173583	-0.0207619	-0.0175451
712	3292	H	H1	C	C4	0	SC	LQD	0	0.0943956	-0.110884	-0.0433817	-0.0361279	-0.0258279	0.00870617	0.0359369	-0.0022575	0.0164748	-0.0451176	-0.113992	0.0291519	-0.0188171	-0.0314007	0.0246725	-0.0467396	-0.0149341	0.0143006	0.00137219	-0.0141324
713	3239	C	C2	C	C3	0	IVC	SD	0	0.00494551	0.135229	0.0247534	0.0453222	-0.0163886	0.0724104	0.0314556	-0.0088411	0.045815	0.00660151	0.0788414	-0.101302	0.0538393	-0.0119865	-0.0134894	0.0439593	0.0141824	0.0244516	-0.0066365	-0.0277008
715	3249	C	C3	H	H1	0	IVC	SD	0	-0.069668	0.03564	-0.0309871	-0.00869	-0.0485962	0.0993519	0.0862784	0.0469564	-0.099135	0.023052	0.146807	0.0834281	-0.0635502	0.0425387	0.191584	0.0682813	-0.0247231	-0.0637261	0.0821187	0.0292293
716	3291	H	H1	C	C3	0	SC	SD	0	0.0191599	0.0111539	-0.123246	0.0267478	-0.123069	0.0323877	-0.0122901	-0.00935627	-0.0187689	-0.00290433	0.0317761	0.0579205	-0.116412	-0.00716744	0.0547099	0.0381283	-0.000308932	-0.045076	0.0069996	0.0135053
717	3256	C	C4	H	H2	0	IVC	SD	0	0.0399945	0.120598	-0.0660326	0.0249423	0.040136	0.0186765	-0.0408145	-0.0111723	-0.00387703	-0.00179027	0.10454	-0.0552913	0.00782159	-0.0234481	0.0186048	-0.00781488	-0.0274197	0.0662104	-0.036647	0.00990271
718	3373	H	H2	C	C4	0	SC	LQD	0	0.0677275	-0.0568496	-0.0279437	-0.0636074	0.0367654	0.0620469	0.0322489	-0.00532059	-0.0226908	0.031694	-0.0458418	0.00239239	-0.0026337	0.0834211	0.0123839	-0.0560374	0.0375788	0.0495675	-0.0480319	0.0403196
719	3258	C	C4	C	C2	0	SC	LQD	0	0.0878351	-0.0635436	-0.0599429	-0.0298188	0.0386146	0.0483257	-0.0356312	-0.0242209	-0.00972884	0.0138756	-0.082441	-0.00241063	0.00639666	-0.00336196	0.0464281	0.00681072	-0.0187778	0.0136137	-0.0345122	0.0330736
720	3366	C	C2	C	C4	0	IVC	LQD	0	0.0805959	-0.0344678	0.000878598	0.0318259	0.0764929	0.034924	-0.0195545	0.00217119	-0.0566383	0.0147472	-0.135273	0.0338771	0.00284876	-0.0539366	0.0199394	-0.0119473	-0.00447054	-0.012806	0.00518091	-0.0226153
721	3286	H	H3	H	H4	0	IVC	LQD	0	0.101726	-0.090174	-0.00438797	0.00420838	-0.00614224	0.035814	0.0162322	0.027788	0.0426241	-0.0290929	-0.0685933	-0.0650566	0.0358713	0.052893	0.019324	-0.0149857	-0.0419181	0.0172708	-0.0192523	-0.0278345
722	3315	H	H4	H	H3	0	SC	LQD	0	0.111923	-0.0801599	-0.0313699	-0.00557407	0.0655173	-0.0374236	-0.00732824	0.0081486	0.0170539	-0.0133754	-0.0769264	-0.0484778	-0.0414524	0.0257106	-0.0104765	0.0210567	-0.0261932	-0.0248815	-0.00835101	-0.0340881
723	3288	H	H3	C	C2	1	SC	SD	0	0.0203567	0.112246	-0.0608399	0.00879439	-0.0450755	0.001745	0.00429414	0.0785916	-0.0204537	-0.0458655	0.188738	-0.132357	0.0293804	-0.0217943	-0.0315368	-0.0358967	-0.0284324	-0.00292047	-0.0617479	0.00777344
724	3364	C	C2	H	H3	1	IVC	SD	0	-0.0157792	0.101249	0.0508196	0.144741	-0.0634009	0.0522242	-0.0188277	-0.043446	-0.0353512	-0.00143894	0.081178	0.123974	-0.0586885	-0.0369284	-0.0196631	0.0422209	-0.0364006	0.0613498	-0.00174992	-0.0186014
725	3294	H	H1	C	C2	1	IVC	SD	0	0.0634954	0.0316549	-0.0495	-0.0106337	-0.041017	-0.00829421	0.0433842	0.00211708	0.0172096	-0.0453155	0.0796266	-0.0622781	-0.00195915	-0.00713984	0.0126049	0.0274694	-0.00594299	0.0137257	0.0015857	-0.018343
726	3369	C	C2	H	H1	1	SC	SD	1	-0.505283	-0.100758	-0.0725092	0.16877	0.0828472	-0.186317	0.237718	-0.13251	-0.0177789	0.150798	0.149458	0.255381	-0.0892024	-0.0640912	-0.0219204	0.0306013	-0.0200615	0.0555676	-0.0585384	-0.0791539
727	3316	H	H4	H	H2	0	SC	LQD	0	0.1073	-0.0561852	-0.0404863	-0.0464277	0.0321983	0.00269983	-0.0196994	-0.00436755	-0.00434153	-0.00714437	-0.0983009	0.0042749	-0.00898222	-0.00479299	0.0237447	0.00531453	-0.0548325	0.0101131	-0.0146628	0.0342138
728	3351	H	H2	H	H4	0	IVC	LQD	0	0.0993554	-0.10021	-0.00726449	-0.0198824	0.0103874	-0.0296138	0.0229545	0.050443	0.0176032	-0.0736821	-0.0579222	-0.0901227	-0.00310267	0.030025	0.0142799	-0.0832662	-0.0223969	0.0113361	-0.00354943	-0.0477836
729	3318	H	H1	C	C4	1	SC	SD	0	-0.0464599	0.0490809	-0.0108179	-0.101934	-0.0315618	-0.030329	-0.0303996	-0.069534	-0.0815843	0.0528431	0.0455221	0.0178169	-0.101673	0.0735393	-0.015248	0.0332973	-0.0323076	-0.0157777	0.0331652	0.01664
730	3360	C	C4	H	H1	1	IVC	SD	1	-0.479183	-0.0329801	-0.0480652	-0.0640519	-0.0448089	0.0381868	-0.0450427	0.0907761	-0.0303684	-0.0652911	0.0837341	0.202569	0.0587665	-0.0116304	-0.0138987	-0.0653277	-0.0258964	-0.0131918	0.00814594	-0.0593526
731	3348	H	H2	C	C4	1	SC	LQD	0	0.0390702	-0.0679019	0.0472939	-0.0163474	-0.0606464	-0.0286294	-0.0485928	-0.000438607	-0.0648484	-0.0591097	-0.119388	0.0490122	-0.0363228	-0.0234613	-0.00385555	-0.0366016	-0.0368415	-0.00994809	0.0125149	0.0127583
732	3361	C	C4	H	H2	1	IVC	LQD	1	-0.556796	-0.0766208	-0.0833026	0.0434598	0.0418091	0.0693332	0.098359	0.01901	-0.0159793	0.0391823	0.0599387	0.218812	0.0191507	0.0109919	-0.0157098	-0.00537808	0.0778686	0.0199803	-0.0552735	-0.0154092
733	3350	H	H2	H	H3	1	SC	SD	0	0.032793	0.0746078	-0.0136447	-0.00249028	-0.0430472	-0.0036499	0.0268767	0.0202639	0.00911923	-0.0500486	0.0796592	-0.0241665	-0.0519258	-0.0243356	0.0211673	-0.0278041	-0.0264862	-0.0217254	0.0284146	0.00396069
734	3372	H	H3	H	H2	1	IVC	SD	0	-0.0216939	0.159895	0.0703889	0.0986634	0.0435901	-0.036636	0.0735121	0.0115013	0.036092	-0.125833	0.130882	-0.0991227	0.00172266	-0.0688863	-0.0724695	0.0629095	-0.0312102	-0.0640118	0.0161412	0.0129209
735	3349	H	H2	H	H3	0	SC	LQD	0	0.0228828	-0.0771759	0.0987374	-0.0944033	0.0116659	0.0326914	0.0655173	0.00770276	-0.0149705	0.0409313	-0.0692666	-0.0158138	0.0822887	0.0631023	0.0301	-0.00766273	0.000702271	-0.00396985	-0.00074332	0.00270707
736	3384	H	H3	H	H2	0	IVC	LQD	1	-0.573651	-0.0725742	-0.054702	0.101239	0.019622	-0.0603139	0.0563989	-0.0612128	0.114367	0.055338	0.108076	0.175865	0.0954674	-0.00725117	0.0137276	-0.0107692	0.000340868	-0.0425169	-0.0294561	0.00682852
737	3395	H	H3	H	H1	1	SC	SD	0	-0.0204355	0.05153	0.0312823	-0.119308	-0.031362	-0.0432751	0.110941	0.0191684	0.0226954	-0.0167061	0.058882	-0.0429525	0.021117	0.0320022	-0.0334593	-0.00692033	0.0391868	-0.0074252	0.0343583	-0.0299996
738	3401	H	H1	H	H3	1	IVC	LQD	0	0.0833878	-0.111372	0.00747093	-0.0296709	0.00693368	-0.00977125	0.135948	0.0335562	-0.00577017	-0.0517552	-0.102101	-0.00652272	0.00371366	-0.0447396	0.033027	-0.0357902	-0.011234	-0.0130948	0.0155481	-0.0179475
739	3398	H	H3	C	C3	1	IVC	SD	0	0.0342011	0.117161	0.0505822	0.0788692	-0.0108913	0.0763263	0.0559097	0.000703933	0.0413313	-0.0292381	0.11668	-0.122512	0.0510527	-0.0438298	-0.022012	0.0374551	-0.0169487	-0.0225356	0.0145901	-0.0167089
740	3423	C	C3	H	H3	1	SC	LQD	0	0.054549	-0.0322272	0.0690187	0.0154201	0.100027	0.0894242	-0.0184228	-0.0371873	-0.00522957	0.0254214	-0.0610453	-0.0312996	0.085398	0.0717267	0.00638541	0.0116592	-0.0327992	0.0330271	0.0266048	-0.0274754
741	3399	H	H1	C	C1	1	IVC	LQD	0	0.096675	-0.115872	-0.0307134	-0.0310949	0.00561341	-0.0147154	-0.0166223	-0.0604616	0.000355359	-0.0230495	-0.0915994	-0.0222604	0.0161661	0.00606614	0.0378272	-0.00520957	-0.0117595	0.0155428	-0.0293022	0.0184951
742	3436	C	C1	H	H1	1	SC	LQD	0	-0.0430962	-0.0462366	0.0901118	-0.0218473	-0.0584521	0.0843859	0.129989	-0.114996	-0.0681321	0.00444271	0.0576987	0.146848	0.108268	-0.00390738	0.0312379	0.0162961	0.0260025	0.0295178	-0.00110941	0.0259948
743	3400	H	H1	C	C3	0	IVC	LQD	0	0.106018	-0.12355	-0.0300654	0.00209528	0.00177467	-0.00244036	0.053419	0.0143675	0.0210393	-0.0238742	-0.115803	0.00294556	0.0173014	-0.0563443	0.0308894	0.0137942	0.0461702	0.00653841	0.00198936	-0.0154537
744	3424	C	C3	H	H1	0	SC	SD	0	-0.0794607	0.114351	0.0619327	-0.0265688	-0.00303205	0.0924463	0.091495	-0.0213843	0.00149863	0.0483452	0.227826	-0.0904119	0.0307963	0.0164947	0.0861135	0.0453588	0.0213196	-0.0260884	0.0856855	0.0330366
745	3404	C	C2	C	C1	1	SC	SD	0	0.0560937	0.0534493	-0.0914452	-0.0642909	0.00913715	-0.0386688	-0.0292223	0.00949701	-0.0177638	-0.00454751	0.0418856	0.00438551	-0.0934069	0.0128108	-0.0144046	-0.0291669	-0.0231711	-0.0191663	-0.0204952	0.0200548
746	3433	C	C1	C	C2	1	IVC	LQD	0	0.139431	-0.07157	-0.0383333	0.04708	0.0823372	-0.0524842	0.0274278	0.0216295	0.0133021	0.0398513	-0.173019	0.024604	-0.00466981	-0.0743077	-0.00103441	0.0449551	0.0647626	0.0109291	-0.00831852	-0.0319205
747	3405	C	C2	C	C3	1	SC	SD	0	0.0586046	0.0148719	-0.0248808	-0.0305137	-0.0315822	-0.0935589	-0.0787112	-0.00757422	-0.0340178	0.00514735	-0.0201066	0.0198943	-0.106877	-0.021216	-0.0393005	-0.0175204	-0.0216764	-0.0265833	-0.0186577	0.0241474
748	3421	C	C3	C	C2	1	IVC	LQD	0	-0.0352699	-0.0539704	0.158503	-0.00475207	-0.0130333	-0.0327806	-0.0696778	-0.0385581	-0.041302	0.0257022	-0.0715123	0.0366762	-0.00337928	0.048887	-0.065608	-0.00999059	-0.0175836	0.0110147	0.0764715	-0.00357023
749	3411	C	C2	C	C1	0	SC	SD	0	0.00999634	0.0611216	0.0191834	-0.00302277	0.00120735	-0.0350448	0.0305024	0.0627973	-0.0840524	-0.0149162	0.0889541	-0.160867	0.0357896	-0.0441329	-0.0279212	-0.00706368	0.00106781	-0.0360449	-0.0451606	0.0128158
750	3435	C	C1	C	C2	0	IVC	LQD	0	0.0606818	-0.0387471	0.0330973	0.0559791	0.0312481	0.0220079	0.0401247	0.0813052	-0.0826794	0.00807097	-0.0831291	-0.020016	0.0342496	0.0380835	-0.0248098	0.0463041	0.0613978	-0.0289384	-0.011056	-0.00291225
751	3434	C	C1	C	C3	0	IVC	LQD	0	0.0409652	0.0286527	0.0266486	0.0667419	0.123285	-0.0254208	-0.0519861	0.045372	-0.0235457	-0.0139462	-0.0472541	-0.00157624	0.0201875	0.0383443	-0.0536165	0.0408947	0.0427531	0.0057552	0.0271132	0.0104735
752	3456	C	C3	C	C1	0	SC	SD	0	0.0468812	0.0524721	-0.026154	-0.00832201	0.0552015	0.0118264	-0.0416938	-0.00850021	-0.0267483	-0.0194765	0.117709	-0.158889	0.0726233	-0.00616446	-0.0189895	-0.0801587	0.00238254	0.0111095	-0.0197551	0.018907
753	3443	C	C2	H	H2	1	IVC	LQD	0	0.0853687	-0.0435663	0.0415869	0.121307	0.00580334	-0.0292951	-0.0302495	0.0332965	-0.0362122	-0.012838	-0.140559	0.00263753	-0.024054	-0.0380401	-0.0283791	-0.0095815	0.0134231	0.011052	0.0314009	0.00372264
754	3461	H	H2	C	C2	1	SC	LQD	0	0.0466031	-0.0545933	0.0204679	-0.0117435	-0.0751663	0.0172238	-0.0412208	-0.00093434	-0.00641323	-0.0389939	-0.0556462	0.0313182	0.00136128	0.063797	-0.00639061	-0.0364457	0.018926	-0.0131875	-0.00682455	0.0339713
755	3441	C	C2	C	C3	0	IVC	LQD	0	0.0750538	-0.0157155	0.033877	0.0840035	0.113514	-0.0181536	-0.0441286	0.0218818	-0.0453756	0.0129619	-0.111934	-0.0107385	-0.00565298	-0.0724395	0.0110713	0.0354611	0.00192411	-0.0180799	-0.0239876	-0.00710001
756	3453	C	C3	C	C2	0	SC	LQD	0	0.0768583	-0.0667172	-0.0329257	-0.0490058	0.0448727	0.0607547	0.0218883	-0.0285241	-0.0600978	0.00838033	-0.0253204	-0.0296759	0.0853266	0.0201624	0.0319477	-0.000657537	0.0391988	0.00694145	0.0264507	-0.0010599
757	3452	C	C3	H	H2	1	SC	LQD	0	0.0847754	-0.0813022	0.0004169	-0.0265918	-0.00616293	0.0665396	-0.00290277	0.0349334	0.00773258	-0.00268243	-0.0346555	-0.100377	0.0840948	0.0233208	0.0443235	0.00159355	-0.0118947	0.0296687	0.00351336	-0.0258319
758	3460	H	H2	C	C3	1	IVC	SD	0	-0.00617139	0.101707	0.0524561	0.0433596	0.0123064	0.003066	0.006939	0.0341427	0.0126415	-0.102418	0.1199	-0.126494	0.0244856	0.00332632	-0.0697319	-0.048878	0.0157974	0.00502091	-0.014422	-0.017424
759	3458	H	H2	H	H3	1	IVC	SD	0	0.0074779	0.154208	-0.0663566	-0.0112423	-0.0447887	-0.00252274	0.0243524	0.0392656	0.0132012	-0.0672652	0.166126	-0.0705474	0.0318824	-0.0302099	-0.014057	-0.0519096	-0.0351914	-0.00534215	-0.0100497	0.0161848
760	3466	H	H3	H	H2	1	SC	SD	0	0.0597793	0.0397218	-0.0170719	-0.0432035	-0.0466755	-0.00864122	0.0444698	0.019768	0.0498114	-0.0464558	0.110451	-0.086874	0.0176236	-0.0272102	-0.0142537	-0.0219121	-0.0102003	-0.045651	0.0105223	0.00707752
761	3462	H	H2	C	C1	0	SC	LQD	0	0.0963376	-0.074281	-0.0923654	-0.0544472	0.0178076	0.0437073	-0.0281526	-0.00335813	0.0046852	-0.0473075	-0.0817073	-0.0189628	0.00915779	-0.0189955	0.0525116	-0.0167866	-0.0353873	0.00212135	-0.0121206	0.00879369
762	3476	C	C1	H	H2	0	IVC	SD	0	0.0315039	0.14107	-0.0999553	0.0245642	0.0238791	0.0184207	-0.0361071	0.0241985	-0.0311928	0.0286814	0.123356	0.00250765	-0.0783675	-0.00581582	0.0343712	-0.0799813	-0.0108067	0.0678352	0.0100163	0.0168036
763	3465	H	H3	H	H1	0	SC	SD	0	0.0328447	-0.00291836	-0.00808073	-0.110962	0.0201231	-0.0196369	0.0166805	-0.0512924	-0.00911109	-0.00106513	0.0519069	-0.160889	0.0908918	-0.00341774	-0.0101831	-0.0776205	0.0399499	-0.00370811	0.000256395	0.00387034
764	3506	H	H1	H	H3	0	IVC	LQD	0	0.087401	-0.151598	0.0374657	0.0264167	-0.0595963	-0.109808	0.00137771	-0.00779838	-0.0020336	-0.0447713	-0.179486	0.00673744	-0.0711964	-0.0370759	-0.0128741	-0.0546669	-0.0134446	-0.00544144	-0.0282574	0.00522348
765	3475	C	C1	C	C3	1	IVC	SD	0	0.0160709	0.110427	-0.0894375	0.0504624	-0.109243	0.00150359	-0.0468391	0.0301919	-0.0551411	-0.0182342	0.0731482	0.0270676	-0.0766281	0.0810408	-0.050599	-0.0621926	0.00919343	0.0544998	-0.0172057	0.0208247
766	3492	C	C3	C	C1	1	SC	LQD	0	0.0833106	-0.0882914	0.00344077	0.0720144	-0.0397531	-0.0310662	-0.0293373	0.0152712	-0.0158631	0.0029684	-0.127419	0.0364015	-0.0214939	-0.0490411	-0.0221161	-0.0127647	0.0448393	-0.00139854	0.0176689	-0.0227203
768	3503	H	H1	C	C3	1	IVC	LQD	0	0.131391	-0.107414	-0.0591765	0.0225797	0.0866842	-0.115902	-0.00555113	0.0212874	-0.00709828	-0.0318292	-0.152624	-0.028521	-0.0514362	-0.0297325	-0.0104395	-0.0542088	-0.00131234	-0.00584678	0.000395653	-0.00352148
769	3493	C	C3	C	C4	0	SC	SD	0	-0.108916	0.13253	0.0431985	-0.0479367	0.0121047	-0.0678393	0.0936632	0.12259	-0.0408639	0.00361576	0.165247	0.0109279	0.00911638	-0.165643	-0.0107837	-0.047584	-4.70245e-05	0.0409353	-0.0273679	-0.00327871
770	3511	C	C4	C	C3	0	IVC	LQD	1	-0.531316	-0.0942383	-0.0400316	-0.0382515	0.028932	0.0576203	-0.0410413	0.0981883	0.000680525	0.0371989	0.0724278	0.140639	0.114083	0.0992268	-0.0165196	-0.0363053	0.0856374	-0.0798046	-0.0207653	-0.0193526
771	3504	H	H1	C	C4	1	IVC	SD	0	-0.00589367	0.0192414	-0.0318981	0.00310493	-0.119138	-0.0994612	-0.00154361	-0.0325436	-0.0371597	-0.0337629	0.0445549	0.0972809	-0.12019	-0.0105189	-0.0398577	0.0203783	-0.0709799	-0.00721261	0.0186927	0.0131116
772	3508	C	C4	H	H1	1	SC	SD	1	-0.520906	-0.0463289	-0.0472868	0.00143655	0.0101069	-0.0257747	-0.0988204	0.0312894	0.00771446	-0.0362454	0.0855232	0.222049	0.047869	0.0334039	-0.0240407	-0.0408789	0.0610262	-0.00452857	-0.000930234	-0.00278538
773	3505	H	H1	C	C1	1	IVC	SD	0	0.0374917	0.0883055	-0.0888529	-0.00453785	0.0284896	-0.0490141	0.0438741	0.013803	-0.0602662	0.0202619	0.111712	-0.0511265	-0.119241	0.0564087	0.0451034	-0.0012695	0.0549111	-0.0105644	0.0269733	-0.017534
774	3539	C	C1	H	H1	1	SC	SD	0	0.0456776	0.0309482	-0.0327745	0.0419515	-0.095504	-0.0467323	0.000913787	0.00458641	0.00663312	0.0228578	0.0229771	0.073266	-0.0542796	-0.0310746	0.0164654	0.0525318	0.00571019	0.0152502	-0.00282481	0.0260395
775	3507	H	H1	H	H4	1	IVC	SD	0	0.0501387	0.0888638	-0.11267	-0.0162003	0.00802844	-0.0669205	0.0348456	-0.0287518	-0.0061688	-0.0188985	0.0715957	-0.0458411	-0.046043	-0.0171257	0.00449113	-0.0339451	-0.0171764	-0.0046025	-0.0242748	-0.00910179
776	3546	H	H4	H	H1	1	SC	SD	0	0.0229294	0.117359	-0.0467063	-0.0121719	0.0158678	-0.00252569	0.0207558	-0.0587593	0.0623645	7.24473e-05	0.142882	0.0351356	0.0319803	-0.0793957	-0.0121175	0.0128832	0.017303	0.0415782	0.0288326	-0.00810478
777	3512	C	C4	H	H4	1	SC	SD	1	-0.557957	-0.0548073	-0.0510357	0.0488993	0.0355251	-0.0133875	-0.0662324	0.0180562	0.0157801	-0.0556031	0.125935	0.213585	0.0456796	-0.004834	-0.0141679	-0.00949992	0.037251	-0.0164398	-0.0119989	-0.0393051
778	3549	H	H4	C	C4	1	IVC	LQD	0	0.0358383	-0.0318584	0.0807757	0.0529201	0.0414	-0.0539974	0.012966	0.0346003	0.00625491	-0.0367624	-0.116779	0.0156641	-0.0259888	-0.0410741	-0.017801	-0.0210667	-0.0135347	-0.0335381	0.0178444	-0.00127697
779	3544	H	H4	H	H2	1	SC	LQD	0	0.0437111	-0.0882363	0.0911108	-0.0535159	-0.0774146	-0.0638205	0.00879612	-0.0374995	0.0426003	0.0636896	-0.0635658	-0.0418076	0.0386489	0.0759056	0.00868566	0.0568898	-0.0214527	0.00148401	-0.0701479	-0.0112064
780	3569	H	H2	H	H4	1	IVC	LQD	0	0.0397877	-0.00989746	0.0736071	-0.0706747	0.0755117	-0.05017	-0.0483834	-0.00601012	0.0302169	0.025177	-0.0777564	-0.0171875	0.052859	0.0482482	-0.0025195	-0.0218213	0.0463305	-0.0119886	0.0334666	-0.0166521
781	3565	H	H2	C	C4	0	IVC	SD	0	0.00844279	0.120374	0.00178365	0.112169	-0.05449	0.0216842	0.015268	-0.0366251	0.0212765	-0.0445783	0.0676023	0.0887898	-0.0466449	-0.00903089	-0.0209749	0.0786556	0.00494146	0.070481	-0.00698501	0.0136794
782	3596	C	C4	H	H2	0	SC	SD	0	0.0515669	0.0309184	-0.0770949	0.058243	-0.0126445	0.0287749	-0.0553999	-0.0488972	-0.0433091	0.0218236	0.0243624	0.122959	-0.055597	-0.0323019	-0.0492419	0.0315295	0.00190104	0.0547066	0.00998746	-0.0075553
783	3566	H	H2	H	H4	0	SC	LQD	0	0.0749957	-0.0688977	-0.0219682	0.0324742	-0.0135798	0.0426853	0.0153358	0.0174625	0.00350829	-0.0432678	-0.078029	0.0166327	0.0613041	0.017637	0.0334571	0.00353943	0.0124339	0.00501755	0.0157372	0.0281915
784	3579	H	H4	H	H2	0	IVC	SD	0	-0.0314978	0.132707	0.0210682	0.00496906	0.11727	-0.0365941	-0.0268066	-0.01851	0.015768	-0.114871	0.119909	-0.0743295	0.00227957	0.018289	-0.0501328	0.0204318	0.0730475	-0.00102081	-0.00130374	-0.0401186
785	3568	H	H2	H	H3	1	IVC	LQD	0	0.0814986	-0.051376	0.00443249	0.0198739	0.0677407	0.000253476	-0.0309543	-0.0117618	-0.023051	-0.0178836	-0.0828457	-0.00126163	0.0528112	0.0358874	-0.000118417	-0.000890616	-0.00238999	0.0112936	0.046742	0.00199764
787	3580	H	H4	H	H3	1	SC	LQD	0	-0.130875	-0.0605037	0.15388	-0.110697	0.00899582	0.0606593	0.0624269	-0.0126692	0.034088	0.00074572	-0.031914	-0.0277318	0.124085	0.100569	0.0454372	0.0529828	0.024688	0.0466671	-0.0379495	-0.0198385
788	3618	H	H3	H	H4	1	IVC	SD	0	0.018369	0.0740785	0.0292513	0.0324958	-0.0833636	-0.0880238	0.00775355	0.0106076	0.00494706	-0.0258227	0.0811882	0.0679245	-0.108549	-0.0274337	-0.0443579	0.0676687	-0.00358015	0.0139778	-0.0236108	0.0373878
789	3597	C	C4	C	C3	1	SC	LQD	0	0.0717707	-0.0666603	-0.0343728	-0.0554572	0.0573639	0.0147167	0.0168493	-0.0310434	-0.037641	0.0161413	-0.0739674	-0.0116478	0.0596565	0.0591742	0.0361916	0.00864942	-0.0158679	0.0418467	-0.000456903	0.0196853
790	3606	C	C3	C	C4	1	IVC	SD	0	0.0413931	0.112179	0.0198784	0.0697096	0.0780303	0.0239498	-0.0161772	-0.0437225	0.0188833	-0.0167292	0.0715569	-0.00720655	0.0165509	0.026278	-0.0224967	0.0535843	0.0416267	0.060506	0.0118616	0.00596546
791	3598	C	C4	H	H3	0	IVC	LQD	0	0.101165	-0.0502263	-0.0360995	0.0328775	0.0619453	-0.0473935	-0.0278527	0.00541115	0.0205302	0.0140815	-0.127756	-0.0449455	-0.0483462	-0.0066327	-0.0252151	-0.0567294	-0.00070605	-0.0135453	0.00112661	-0.00175974
792	3616	H	H3	C	C4	0	SC	LQD	0	0.0685771	-0.0328855	0.00135077	0.0516553	-0.0158997	-0.000659535	0.0685777	-0.0104168	0.035222	-0.0241991	-0.0575586	-0.0181803	0.0460752	-0.0711103	0.0576523	0.0248956	-0.00893209	-0.0182523	-0.0034441	0.0069087
793	3601	C	C4	C	C2	0	IVC	LQD	0	0.0992576	-0.0466262	0.0103778	0.051033	0.100882	0.00226349	-0.0547912	0.0166697	-0.0246431	-0.00612044	-0.0958601	-0.0075292	-0.0186542	-0.0510455	-0.000475945	-0.0376714	0.0462333	0.0118856	0.0179241	-0.0175628
794	3644	C	C2	C	C4	0	SC	LQD	0	0.0339827	-0.0071616	0.0905863	0.0836491	-0.0151457	0.0209129	-0.0240108	-0.0172431	-0.0430334	0.0123357	-0.0558177	0.0645785	0.0465955	0.000845203	0.0115186	0.0285097	0.0384525	0.0196598	0.0027919	0.0289501
795	3604	C	C3	H	H3	1	IVC	SD	0	-0.00562474	0.104764	0.0931465	0.0757972	-0.0307856	0.0192621	0.0473638	-0.00959964	-0.0269949	0.0211607	0.0425059	0.153204	0.00560274	-0.0267266	-0.0402244	0.0218151	0.0386797	0.0741285	0.02022	0.00226118
796	3615	H	H3	C	C3	1	SC	LQD	0	0.0735005	-0.057108	0.0417799	-0.00453326	-0.0117891	0.0221244	0.0218467	0.00288798	0.0320038	-0.0345221	-0.0698649	0.00769374	0.0550524	-0.00614028	0.0354171	0.016862	0.0215917	-0.00376607	0.0118219	0.0213738
797	3603	C	C3	C	C2	1	SC	LQD	0	0.0578115	0.0295128	0.0891887	0.113632	0.0845083	0.00988026	-0.00275071	0.0560642	0.0179288	-0.00988205	-0.0391999	-0.0477607	0.0623572	0.0277246	-0.0531143	0.0543512	0.0657597	0.0251056	0.0566691	-0.0279199
798	3640	C	C2	C	C3	1	IVC	LQD	0	0.0913664	-0.0416725	0.0598328	0.0879074	0.0499466	-0.0206933	0.00195487	0.0781457	-0.0125619	0.0120284	-0.135959	0.0423479	-0.0100182	-0.0579452	-0.046875	-0.00852054	0.0586376	0.00727749	0.0657838	-0.0267764
799	3605	C	C3	H	H3	0	SC	SD	0	-0.0168994	0.0837906	0.0622059	0.077629	0.034159	0.043191	0.0726896	0.016455	-0.0662762	-0.0233887	0.097619	-0.0404631	0.0715625	-0.0516547	-0.0380128	0.0557358	0.0384754	0.0154825	0.048485	0.0523423
800	3622	H	H3	C	C3	0	IVC	LQD	0	-0.0354751	0.00244242	0.147319	0.0503161	-0.0217309	-0.0482846	-0.0162191	-0.0487581	-0.0713883	-0.081513	-0.0472781	0.0111326	0.0472283	0.049862	-0.0113492	0.00969422	-0.0184508	0.0349867	0.0204839	0.0320506
801	3621	H	H3	C	C2	1	SC	SD	0	-0.013064	0.115297	0.0620943	0.0359282	-0.0188752	0.000710127	0.0395937	0.0217391	-0.0274092	-0.0273595	0.0669456	0.0773274	-0.0644367	-0.0396871	0.00200364	0.0682195	-0.040513	-0.0163814	-0.0360267	0.00382347
802	3643	C	C2	H	H3	1	IVC	SD	0	-0.0131768	0.112844	0.0999281	0.0327233	0.00136116	0.0095414	0.0257046	-0.011414	0.0122391	-0.0350831	0.0684122	0.0952264	-0.0501591	-0.0589705	-0.0201619	0.0713589	-0.0608281	0.01838	-0.0200056	-0.0144916
803	3623	H	H3	H	H4	0	SC	LQD	0	0.0198203	-0.0773317	0.103626	-0.0220502	-0.0687473	0.0507407	0.0481176	-0.0671454	-0.0946327	-0.00274544	-0.0330148	-0.00318745	0.0652391	0.0770821	0.00919404	0.00585243	-0.0837051	0.0399579	-0.00690569	0.0202546
804	3679	H	H4	H	H3	0	IVC	SD	0	0.0639001	0.0159412	-0.0844691	-0.0608392	0.0111648	-0.0103209	0.00756359	-0.0334264	-0.0307367	-0.019078	0.0741464	-0.00561063	-0.0185535	-0.0259346	0.0217333	0.00485594	-0.0238555	0.0250983	0.00215824	0.00350001
805	3653	H	H1	H	H4	1	SC	SD	0	0.037555	0.0887764	-0.0851653	-0.0368468	0.0233472	-0.0555529	-0.0215411	-0.0185316	-0.0432622	-0.0666076	0.136573	-0.0530884	-0.15912	0.0772109	0.0641233	-0.0246858	0.0224762	0.00179359	-0.00278836	-0.021513
806	3677	H	H4	H	H1	1	IVC	SD	0	-0.102945	0.017495	0.12598	-0.204464	0.07779	-0.0745241	0.00811162	0.0180739	-0.0408529	0.0404853	0.0238726	-0.0804248	0.01862	0.00618106	-0.025181	0.0199952	-0.0377214	-0.0523134	0.00257469	-0.0589999
807	3654	H	H1	C	C2	1	SC	SD	0	-0.0118068	0.0845295	-0.112275	-0.0427396	-0.048719	-0.0412502	0.057946	0.0866735	-0.0869517	-0.0943104	0.122142	-0.0609538	-0.138463	0.0409942	0.0544704	-0.0856313	0.0131778	-0.0492755	-0.00626514	-0.0295782
808	3719	C	C2	H	H1	1	IVC	LQD	0	0.109866	-0.0479646	0.00384661	0.0448411	0.016588	-0.00773398	0.00797269	0.072632	0.00529216	-0.0374738	-0.101781	-0.0353844	-0.0444075	-0.0104551	0.0121275	-0.0578102	-0.00206028	0.0235905	-0.0312574	0.00506792
809	3655	H	H1	H	H3	0	SC	LQD	0	0.0870847	-0.106383	-0.055212	0.00361269	-0.0876876	-0.0528633	-0.0217998	-0.0123561	-0.0130598	-0.0250224	-0.0843274	-0.0363415	-0.026249	0.0376294	-0.00120063	-0.0210777	-0.0406241	0.000742264	-0.0334429	0.0154539
810	3671	H	H3	H	H1	0	IVC	SD	0	-0.00274216	0.108664	-0.0439325	0.0824939	-0.105454	-0.0313835	-0.0163013	0.00564967	-0.0643881	-0.0519879	0.0777347	0.0434525	-0.100568	-0.00644786	-0.0332963	0.00586018	-0.025766	0.040116	-0.0588747	0.0282775
811	3656	H	H1	C	C1	1	SC	LQD	0	0.112058	-0.0784116	-0.0634614	-0.0388133	0.0466708	-0.0286341	-0.0168321	0.0128649	0.0163656	-0.0408911	-0.149813	-0.0340685	-0.0489112	-0.0133312	0.0301421	-0.0428667	-0.018457	0.02024	-0.0425443	0.0156213
812	3750	C	C1	H	H1	1	IVC	LQD	0	-0.0060875	0.0199376	0.0995845	-0.018839	0.0644602	-0.0675723	-0.0232482	0.0359227	-0.0913078	0.114654	-0.133332	0.0378028	0.00850964	-0.0397484	0.000954827	-0.0317683	-0.0121607	-0.0109741	0.0385681	-0.0213365
813	3657	H	H1	C	C2	1	SC	LQD	0	0.125855	-0.0667791	-0.0910327	-0.0273428	0.0186417	0.0112099	-0.0160591	0.00214507	-0.00441151	0.00717061	-0.0900197	-0.0215099	0.0167641	0.00763506	0.0552316	-0.0180395	-0.0432665	0.00966187	-0.0210348	0.0140639
814	3674	C	C2	H	H1	1	IVC	SD	0	-0.0457313	0.127625	0.0713237	0.153712	-0.0690065	0.0184614	0.0185102	-0.0853744	-0.00864707	0.0010969	0.0728291	0.0160008	-0.00253718	0.0386859	-0.0151685	0.103865	-0.012786	0.0297973	-0.0070365	-0.000343864
815	3658	H	H1	H	H2	1	SC	SD	0	0.0449958	0.0369007	-0.12637	-0.108599	-0.00379198	-0.0468904	0.043828	0.00178912	-0.0698831	-0.0298089	0.0979374	-0.120826	-0.137837	-0.0497807	0.0998271	-0.0144773	0.0535597	-0.0893744	-0.0249611	-0.0125339
816	3757	H	H2	H	H1	1	IVC	SD	0	-0.00101616	0.0753918	-0.0291399	0.0192265	-0.0332891	0.0633266	0.0704945	-0.00660849	-0.0583569	-0.0554968	0.111551	0.0626605	-0.000175853	-0.0578512	0.0223007	-0.0126251	-0.0411348	0.047569	-0.0100285	-0.0405728
817	3665	H	H3	H	H4	0	IVC	LQD	0	0.054761	-0.0739901	0.0546691	0.0387114	-0.0475236	0.0287264	-0.0237426	-0.0531043	0.00209442	-0.0368561	-0.0683198	-0.00804574	0.0217592	0.030602	-0.0309447	0.0388633	-0.0387166	0.00557653	0.0196952	-0.000663369
818	3678	H	H4	H	H3	0	SC	LQD	0	0.0604089	-0.116309	0.0468814	0.000593243	-0.0651156	-0.0183963	-0.00313156	-0.0593459	-0.00966915	-0.0295174	-0.0909144	-0.0360831	0.0314228	0.0296512	0.0162479	0.0261294	-0.0457176	-0.00323654	-0.0372002	0.0102136
819	3667	H	H3	C	C2	1	SC	LQD	0	-0.0938871	0.0446675	0.115983	-0.0893489	0.0732068	0.0900606	-0.027372	-0.0926966	0.048944	-0.000189294	0.034767	0.0874342	0.103464	0.0188615	0.0419465	0.0347216	-0.00696262	0.0278036	-0.00713675	0.0265375
820	3675	C	C2	H	H3	1	IVC	LQD	0	-0.0228159	0.0865711	0.0792119	0.0886735	0.102806	0.0706771	0.0144729	-0.0731691	0.0155	0.0116114	0.0110656	0.0782585	0.101065	-0.0256856	0.041396	0.046429	0.0062599	0.0599656	0.0186867	-0.0011379
821	3670	H	H3	C	C1	0	IVC	SD	0	-0.0170901	0.139466	0.0460729	0.0862462	-0.00536258	0.0116678	0.0603511	0.00508896	0.0590765	-0.0593823	0.114779	-0.0323845	-0.0528413	-0.0708212	-0.0412942	0.0189721	-0.0262304	0.00670907	-0.00349928	0.0103949
822	3752	C	C1	H	H3	0	SC	LQD	0	0.0870104	-0.07859	0.0414745	0.0950338	0.0227015	0.00172816	0.0103585	0.0417919	0.0123009	0.0264666	-0.106243	-0.00294141	0.00743507	0.0110796	0.00469983	-0.0163982	-0.0479101	-0.00749674	0.0113126	0.00389623
823	3673	C	C2	H	H3	1	SC	SD	0	0.00449407	0.136833	-0.0676895	-0.000607436	0.0348893	-0.00470827	-0.00494413	0.0102479	-0.04337	-0.00156156	0.178798	-0.0881493	-0.121461	0.0601289	0.0252163	-0.0558982	0.0260329	0.00497512	0.0244147	-0.0536869
824	3764	H	H3	C	C2	1	IVC	LQD	0	0.104448	-0.0590251	0.0321502	0.0320967	0.00354504	0.0112849	0.0412818	0.0107358	0.0549029	-0.0523163	-0.0972334	-0.0727698	0.0276407	-0.0115068	-0.011458	-0.00961461	-0.0426023	0.000590388	0.0575804	-0.0279057
825	3676	C	C2	C	C1	1	SC	LQD	0	0.0777346	-0.00146073	0.0205887	0.0495758	0.0673447	0.0631787	-0.0241739	-0.0042249	0.00277671	0.0487667	-0.0269608	-0.0332338	0.0823137	0.0222037	0.0287172	0.0250585	0.0381713	-0.0237457	0.00830507	-0.0301188
826	3774	C	C1	C	C2	1	IVC	LQD	0	0.0971242	-0.080177	-0.0332929	-0.0100224	-0.0130532	0.0166227	-0.0379826	-0.0518596	0.0171282	0.0302589	-0.0976923	0.00630188	0.0356339	0.00945305	0.0147001	0.0294541	0.032316	0.0109132	0.00400067	0.014037
827	3681	H	H4	C	C1	1	IVC	LQD	0	0.0624831	-0.129047	0.0110922	-0.0739626	0.0504909	0.0249529	-0.0289326	-0.0446999	-0.00658947	0.00469579	-0.0569788	-0.0343046	0.0495347	0.0583822	0.010843	-0.0174487	-0.0476397	-0.0325288	0.00493794	-0.0400841
828	3751	C	C1	H	H4	1	SC	SD	0	0.00554963	0.0434939	-0.0123213	0.0162398	-0.0754858	-0.0361222	-0.0341748	0.00472254	0.0233873	0.0539426	-0.0147465	0.0114429	-0.07323	0.0412803	-0.05127	-0.051061	-0.0289713	-0.0203961	-0.00821216	0.0398928
829	3720	C	C2	C	C1	1	IVC	LQD	0	0.0925288	-0.0188491	-0.011088	0.0407007	0.0689231	0.0717864	-0.0230016	-0.0437046	0.0226742	-0.00520693	-0.0607982	-0.0394032	0.0183785	0.0418333	-0.00711328	-0.0120721	-0.040587	0.0229314	0.00406791	-0.0218954
830	3772	C	C1	C	C2	1	SC	SD	0	0.0768766	0.0765053	-0.101385	-0.0172984	0.0281052	-0.0166573	0.000545259	0.0153228	0.046091	0.00834844	0.0365153	-0.0628296	-0.0395111	-0.0387962	0.0116416	-0.00242586	0.00471187	0.00480229	-0.0365802	0.0190951
831	3755	C	C1	C	C3	1	SC	LQD	0	0.0202673	-0.0210125	0.11993	0.0303886	0.0340163	0.0293191	0.064981	0.0802438	-0.0658551	0.0690008	-0.135333	0.0138281	0.00527033	-0.0783849	0.00505321	0.00685185	0.013064	-0.00222954	0.00850738	-0.0441798
832	3796	C	C3	C	C1	1	IVC	SD	0	0.0195874	0.0460262	-0.0228083	-0.103248	-0.0718905	-0.00954642	0.00732095	0.0483729	0.0648488	0.0677773	0.0973922	-0.0132354	0.00532562	-0.0129638	0.00638984	-0.0648149	-0.0603069	0.024837	0.0223016	0.00679668
833	3756	H	H2	C	C3	0	SC	SD	0	0.034456	0.0715458	-0.133244	-0.0681109	-0.0101856	0.030246	0.00760381	-0.0306548	0.00136949	-0.0539915	0.0905084	0.0308435	-0.0354429	-0.0121539	0.00474106	-0.0810798	-0.0138956	0.0359466	0.00678421	-0.00620725
834	3793	C	C3	H	H2	0	IVC	LQD	0	0.08355	-0.0788516	-0.02468	0.0036332	-0.0863067	0.0176695	-0.0273683	0.0119548	0.0403402	0.0482583	-0.122369	0.0519877	-0.0255707	-0.0108296	0.0016086	-0.0185663	0.0444408	-0.0262761	-0.00522701	0.0242566
837	3763	H	H3	C	C1	1	SC	LQD	0	0.0462445	-0.0610999	0.0648963	0.0443215	-0.0410012	0.0120227	0.0554679	-0.0496295	-0.071187	0.0254266	-0.0555051	-0.0256196	0.0592005	0.101187	-0.0100815	0.0112619	0.0217878	0.0311387	-0.0238331	-0.0235447
838	3773	C	C1	H	H3	1	IVC	SD	0	-0.0387369	0.173041	-0.0809196	-0.132757	0.0110219	0.0361615	0.0238732	-0.00287037	-0.0120669	0.0642863	0.16104	-0.0515652	-0.108499	0.0665287	0.120708	-0.0211945	0.0417111	-0.029431	0.0662607	-0.0196735
839	3795	C	C3	H	H4	0	SC	SD	0	0.00177229	0.0962453	-0.0687107	0.0137573	-0.0577132	0.0763545	0.030602	0.0156633	-0.00107486	0.0244201	0.207194	-0.0382726	-0.0713983	0.0557861	0.168578	0.0478647	-0.0181785	-0.0294451	0.0802978	-0.0180934
840	3888	H	H4	C	C3	0	IVC	LQD	0	0.0708894	-0.123648	0.0182105	-0.019689	-0.0675841	0.00691038	-0.00345596	-0.0312082	0.0186626	-0.0145548	-0.140223	-0.0215131	-0.0284816	0.0224603	0.0111697	-0.0216883	-0.0451811	0.00880774	-0.030551	0.0287035
841	3810	H	H3	C	C1	0	IVC	LQD	0	0.103642	-0.0612522	-0.0188503	0.0478428	0.00255007	0.0246029	0.0307102	0.0257955	0.034457	0.00618155	-0.121642	-0.0020427	0.0364748	-0.0939163	0.0675703	0.0565653	-0.0100288	0.0135462	-0.0370501	-0.0210312
842	3884	C	C1	H	H3	0	SC	SD	0	0.0302824	0.102972	-0.0179059	0.0232098	0.0306216	0.0134656	-0.0280184	-0.0193437	-0.0326528	0.0349037	0.0146718	-0.0194248	-0.0315201	-0.0367444	0.0101753	0.0217867	0.00816232	-0.00419339	-0.0264392	0.0215996
843	3811	H	H3	C	C3	1	SC	SD	0	0.0220545	0.13934	-0.0130295	0.0685516	-0.00885458	0.0232679	0.0640211	-0.00661839	0.0534611	-0.06837	0.133629	-0.0967655	-0.00568111	-0.0227236	-0.0269871	0.0737608	-0.0333554	-0.0348044	-0.00476848	-0.039073
844	3858	C	C3	H	H3	1	IVC	LQD	0	0.0614995	-0.0115184	0.0602268	0.0729027	0.0281677	0.0370918	0.0221394	0.0279962	0.0424842	-0.0074845	-0.0395859	-0.0391863	0.0491512	-0.00294256	-0.011077	0.0260775	0.0261256	0.0303482	0.0584569	-0.00680431
845	3813	H	H3	C	C4	1	IVC	SD	0	-0.0298372	0.133324	0.0474339	0.13635	-0.0771909	0.00798123	0.0209377	-0.0646378	-0.0241044	-0.038881	0.0760881	0.0246152	-0.0380159	0.0199268	-0.0283791	0.093318	-0.036785	-0.0124394	-0.0201699	0.0158438
846	3891	C	C4	H	H3	1	SC	LQD	0	0.0150637	-0.0250774	0.108035	-0.116315	-0.00686775	0.00724112	0.0577356	0.0608817	0.0178002	0.0970986	-0.138561	0.0681055	0.00762101	-0.0495242	0.0193682	0.00939473	0.0773795	0.00270609	-0.0213693	-0.0147789
847	3814	H	H3	H	H4	0	SC	SD	0	0.0696711	0.0464272	-0.0480847	0.0273446	-0.0376587	-0.0067033	0.0545834	0.0169353	0.0170212	-0.0460503	-0.0177522	0.0405266	-0.0916218	-0.121171	-0.00534529	0.0615624	0.017911	-0.0179254	-0.0266417	-0.0232527
848	3890	H	H4	H	H3	0	IVC	LQD	0	0.0974031	-0.0977154	0.0761844	0.0125919	0.0395864	-0.0308856	0.0979228	0.00932313	-0.00125931	0.00763541	-0.131805	-0.0537369	0.0444516	0.0668601	-0.0163733	0.02395	0.0304756	0.00518096	-0.0159821	-0.0295439
849	3855	C	C3	C	C4	0	IVC	SD	0	-0.152711	0.133381	0.0582617	-0.158322	0.0659968	0.0590943	0.0188504	-0.0172316	-0.00990544	0.0495248	0.249895	-0.0393901	-0.0498301	0.014451	0.119817	-0.014809	-0.0153886	-0.0110032	0.117074	0.0299618
850	3893	C	C4	C	C3	0	SC	LQD	0	0.0362833	-0.0408267	0.035589	-0.122515	0.0364531	0.0499205	0.0341536	-0.0439784	0.00271092	0.0433549	-0.0753976	-0.0332198	0.0542564	0.0505075	0.0206142	0.0165915	0.0357255	-0.015464	-0.0145756	-0.00729222
851	3856	C	C3	C	C2	1	IVC	SD	0	-0.0476032	0.167244	0.00545878	0.0740905	-0.00450844	0.0189593	0.0648327	-0.004931	0.0617508	-0.045082	0.269833	-0.182503	0.0197986	0.019318	0.0596595	-0.0212004	0.045761	-0.00690116	-0.00342062	0.016027
852	3908	C	C2	C	C3	1	SC	LQD	0	0.0339247	-0.0457375	0.0613794	-0.0117146	-0.0235869	0.0702085	0.0535921	-0.0454622	0.0365624	0.00478903	-0.0230997	0.00237872	0.0682384	-0.00255343	0.0470118	0.0414176	-0.0563787	-0.000457922	-0.0148724	0.024744
853	3857	C	C3	C	C1	0	IVC	LQD	0	0.0678767	-0.0864225	-0.00518037	0.0401283	-0.0831365	-0.0208632	-0.0151979	-0.0230165	-0.00896378	0.00350233	-0.0742384	0.041888	0.0121568	0.0298408	-0.0084894	-0.00770982	-0.00967839	0.0165565	0.0334798	0.0306382
854	3958	C	C1	C	C3	0	SC	SD	0	-0.0491015	0.0206524	0.0841221	-0.0674275	-0.0832838	-0.00131453	-0.0587705	-0.018845	0.0378211	0.0827224	0.0118471	0.0214253	-0.0181584	0.0347131	-0.0157833	0.0644199	-0.00312545	-0.0170266	-0.0192851	0.0131666
857	3882	C	C1	C	C4	1	SC	SD	0	0.0492589	0.0961154	0.00083209	0.0303876	0.0506871	-0.0300818	-0.0185998	-2.58303e-05	-0.0097155	0.0190815	0.0396846	-0.0973801	-0.0315888	-0.0584329	0.0217749	-0.0286936	0.0411285	-0.0104547	-0.0575603	-0.0128374
858	3895	C	C4	C	C1	1	IVC	LQD	0	0.0898598	-0.0908948	0.00396281	-0.0630034	0.0444758	0.022422	0.00745185	-0.0287555	0.00109952	0.0445529	-0.131942	0.00229603	0.00314613	-0.013226	0.0397929	-0.0235205	-0.0353173	-0.0116624	-0.0143078	0.00712611
859	3883	C	C1	H	H4	1	IVC	LQD	0	0.0897142	-0.0302574	0.00576859	0.0190669	0.075007	-0.0536888	-0.00705099	0.053814	0.0440839	0.0247694	-0.0825215	-0.0215328	-0.0211353	-0.0819338	-0.001683	0.0166689	0.0205994	-0.0436153	0.0179544	-0.0301109
860	3889	H	H4	C	C1	1	SC	SD	0	0.0652794	-0.0139581	-0.0562243	-0.0225179	-0.0990582	-0.0740426	0.0661342	-0.0215534	-0.0459753	0.0165318	0.0109271	-0.050786	-0.147839	0.0960337	0.0140929	-0.000596885	0.0384579	-0.0499278	-0.0249471	-0.0130277
861	3885	C	C1	C	C4	0	SC	LQD	0	0.0734483	-0.0543825	0.0228471	0.0764191	0.0163888	0.0354358	-0.0241237	0.0903337	-0.0104333	0.0187303	-0.133081	0.0119811	0.0200084	-0.0927136	0.0289269	0.0400618	0.0424193	0.0151813	-0.0182394	-0.0436089
862	3928	C	C4	C	C1	0	IVC	LQD	0	0.065388	-0.0881261	-0.0529583	-0.00504591	-0.0728558	0.0193	-0.0579335	0.0236315	-0.0365591	0.025814	-0.105438	0.0170954	-0.0759399	-0.00880321	-0.0254143	-0.0944744	0.0462016	0.0196855	-0.0165855	0.0262259
863	3892	C	C4	C	C2	0	SC	LQD	0	0.0504585	-0.0804963	0.0255678	-0.0957276	-0.0354819	0.0884546	0.0303827	0.00736059	0.0873554	0.0826806	-0.0410923	-0.0229218	0.0718135	0.0632687	0.0777399	-0.00370266	-0.0621274	-0.0566941	-0.0402921	-0.00901987
864	3910	C	C2	C	C4	0	IVC	LQD	0	0.087838	-0.0748651	0.0193618	0.0654338	-0.0579895	0.0215409	0.0186157	-0.0507357	0.0428436	0.0277296	-0.0865784	-0.0515366	0.00871961	0.0382605	-0.00437627	0.0233496	-0.0486867	0.00875124	-0.0281302	-0.00923769
865	3909	C	C2	C	C1	1	IVC	SD	0	-0.151424	0.0155381	0.163113	-0.141186	-0.080357	-0.0594385	0.0600056	-0.0123975	0.0182632	0.0648415	0.044039	0.119817	-0.0238887	-0.0113839	-0.042981	-0.0167876	-0.0493635	-0.0211688	0.0396621	-0.0227125
866	3956	C	C1	C	C2	1	SC	LQD	0	-0.00484484	-0.0822351	0.0566457	-0.0157012	-0.0794137	0.119952	0.0512712	-0.032445	-0.051414	0.0858274	-0.0584593	0.0648472	0.0822447	-0.0363685	0.0983157	0.0283227	-0.0285908	-0.00783102	-0.0488657	-0.00173957
867	3926	C	C4	C	C1	0	SC	LQD	0	0.0903283	-0.0894234	-0.0649595	0.0197871	-0.0719663	0.00437055	-0.0353201	-0.0153233	-0.0358591	-0.00821361	-0.066581	-0.0353403	-0.0191625	0.0673672	0.0163368	-0.061128	-0.0109953	0.0439482	-0.0423927	0.0116483
868	3959	C	C1	C	C4	0	IVC	SD	0	0.0346281	0.134301	-0.0439718	0.0230341	0.0449481	0.0411262	-0.0221519	-0.0188919	-0.0118778	-0.0167556	0.128849	-0.0786749	0.0504515	-0.0169428	0.00231852	-0.0324064	0.00738108	0.0481835	-0.0168535	0.0283341
869	3927	C	C4	C	C2	0	IVC	SD	0	0.0747893	0.0718864	-0.0743531	0.0247623	0.0534972	0.0163119	-0.0533704	0.0132891	-0.0279171	-0.000893372	0.0967544	-0.0784738	0.0383341	-0.0292904	0.00356578	0.0046528	0.015617	0.0165921	-0.000840299	0.0162935
870	4039	C	C2	C	C4	0	SC	SD	0	0.0656541	0.0720571	-0.0372173	-0.0115924	0.0504699	0.0133642	-0.045173	0.0207182	-0.0274704	0.0048651	0.110299	-0.059803	0.0327514	-0.022119	0.00119273	-0.0491671	-0.0213708	0.0158089	0.023314	0.0159157
871	3957	C	C1	H	H4	1	IVC	SD	0	0.0689029	0.026252	-0.064978	-0.0370556	0.0394217	-0.0736559	-0.0223285	0.0145067	-0.00476633	0.0220944	-0.00561568	-0.0306011	-0.0514394	-0.0932384	0.0179968	-0.0253209	0.0207263	-0.0262387	-0.0228968	-0.0283911
872	3975	H	H4	C	C1	1	SC	SD	0	-0.0261346	0.00521617	0.0668511	-0.0912342	0.000328585	-0.226622	-0.0317817	-0.0658785	0.00896529	-0.007204	-0.0431541	-0.0287795	-0.116956	0.0554995	-0.109625	-0.0542106	0.0159066	-0.0612394	-0.00457291	-0.0372883
873	3976	H	H4	C	C2	1	SC	LQD	0	0.115289	-0.0993631	-0.071285	-0.0196691	0.0605644	-0.0442378	-0.0114558	-0.00747775	-0.0090416	-0.0354837	-0.129156	0.020102	-0.00362822	-0.0193886	-0.00373331	-0.0388886	0.0114855	-0.00282401	0.0575486	-0.00160479
874	4040	C	C2	H	H4	1	IVC	SD	0	-0.110178	0.0883576	0.105482	-0.059052	0.14984	-0.0700331	-0.000571436	0.0153722	-0.0579469	0.000633212	0.0807108	0.0862978	-0.0378168	-0.00537063	-0.0468532	-0.0199911	-0.0224431	0.0213589	0.0785005	-0.0183661
875	4038	C	C2	C	C1	1	IVC	LQD	0	0.0900225	-0.049279	0.0420019	0.0372176	0.00636439	-0.0212787	0.0233998	0.0469763	0.0083247	0.00921988	-0.0866398	-0.0185754	0.0337237	-0.0417916	0.0380214	-0.0225589	-0.00150905	0.0127007	0.0343683	-0.00135723
876	4049	C	C1	C	C2	1	SC	SD	0	0.0707184	0.0653193	0.0113047	0.0904479	0.0218763	-0.0888502	0.00916717	0.105114	-0.0150349	0.0235898	0.0325424	-0.164048	0.051725	-0.10797	-0.0203975	-0.0384663	0.0682936	-0.0521126	-0.00769451	0.0217705
877	4041	C	C2	C	C4	1	SC	SD	0	-0.15136	0.0413612	0.183731	-0.0634038	0.0391389	0.00425769	-0.0249046	0.00847919	-0.00584484	-0.0337485	0.126087	-0.0225363	0.113904	-0.0229169	-0.0108365	-0.0500188	-0.0263984	-0.0112836	0.0532281	0.0289831
878	4100	C	C4	C	C2	1	IVC	LQD	0	0.0644072	-0.00136782	0.0814063	0.0677392	0.125219	-0.00454522	-0.0311743	-0.0193598	-0.0171298	-0.0325013	-0.055284	-0.036911	0.0377062	0.0222711	-0.0581464	0.0328864	-0.011279	-0.0175874	0.0458088	-0.0166699
879	4050	C	C1	C	C4	1	IVC	LQD	0	0.0772236	-0.0352188	0.0696663	0.124876	-0.00466397	-0.0496373	-0.0393778	0.0659292	-0.0635248	0.0408531	-0.154246	0.0527384	-0.0279311	-0.0864451	-0.0309593	0.0419518	0.072145	-0.0129699	-0.0175119	-0.0261078
880	4102	C	C4	C	C1	1	SC	SD	0	0.0526293	0.0648049	-0.0391954	0.0312431	0.0422158	0.0179527	-0.0463805	0.00417447	-0.0326336	-0.00244537	0.125505	-0.150295	0.0934595	-0.0385806	-0.0629447	0.0287723	0.0380853	-0.0401955	0.0122263	0.00944813
881	4051	C	C1	H	H3	0	IVC	SD	0	0.0418566	0.098112	-0.0231545	0.0685773	-0.00184233	0.0156065	-0.00937163	0.0909047	0.00181404	0.0256303	0.10561	-0.150793	0.0818798	-0.0422411	-0.0262712	-0.00310655	0.0152204	0.0195234	-0.00498471	0.0481393
882	4069	H	H3	C	C1	0	SC	SD	0	0.0247252	0.0300484	0.00202811	0.0132107	-0.0920147	-0.0122953	-0.0294906	0.0198567	-0.059298	-0.030888	0.0287606	0.0042504	-0.074902	0.0292818	-0.0331858	-0.0213714	0.00320608	0.010159	-0.032093	0.0234851

## Sheet: Beta_Ci0
IR	IRWn	T	L	T_coh	L_coh	S	CT	Diet	Ci	UnWUF01	UnWUF02	UnWUF03	UnWUF04	UnWUF05	UnWUF06	UnWUF07	UnWUF08	UnWUF09	UnWUF10	WUF01	WUF02	WUF03	WUF04	WUF05	WUF06	WUF07	WUF08	WUF09	WUF10
2	1272	H	H4	H	H1	1	SC	SD	0	0.129312	-0.091466	-0.0479405	0.106282	0.0328286	0.0389031	-0.00169623	-0.0498512	-0.0558682	0.0132757	0.170872	0.0327705	0.0406025	-0.00892343	0.026358	0.0440165	-0.0144654	0.0418166	0.0150009	-0.0347461
3	1126	C	C4	C	C1	1	SC	LQD	0	-0.127965	0.0296369	-0.0573778	0.0319407	-0.0332696	0.0197599	0.0223579	-0.0235124	-0.00153925	0.0124096	-0.096872	0.0603564	-0.0413868	-0.0210826	-0.0220245	-0.00753276	0.0265343	-0.0203903	-0.016319	0.0168683
4	1338	C	C1	C	C4	1	IVC	LQD	0	-0.0929215	-0.0968403	-0.0200667	-0.0744005	-0.0171874	0.00960454	-0.0107283	0.00329124	0.0100157	-0.00821943	-0.0819565	0.0110508	0.0191572	-0.0421247	-0.0168768	-0.0201402	-0.0137529	-0.0167627	0.0198143	0.0166221
5	1128	C	C4	H	H3	1	SC	LQD	0	-0.100496	0.0134964	0.0843734	-0.0306477	0.0605026	0.0291513	0.0535667	0.046452	-0.00766247	0.0536047	-0.12427	-0.0207686	-0.0400665	0.0252492	0.0441471	0.00458488	-0.00468775	0.0111335	-0.0205667	0.0247942
8	1270	H	H1	C	C4	0	SC	LQD	0	-0.111972	0.0439259	-0.0213381	0.0480736	0.0193895	0.00532749	-0.0278283	-0.0101892	-0.0177771	-0.0171685	-0.074555	0.0249485	-0.029241	0.0130716	-0.0318635	0.0145041	-0.00330069	-0.0415916	0.00403933	0.00507425
9	1130	C	C4	H	H4	0	SC	SD	0	0.0395939	0.0802359	-0.0213402	0.0185109	-0.0375033	0.0361122	0.0142549	0.0604329	-0.0720472	-0.0439017	0.0794547	-0.00565388	-0.000680014	-0.0141656	-0.0217217	-0.0301759	-0.00834701	-0.0400401	-0.00555417	-0.0137269
12	1490	H	H2	C	C4	1	SC	LQD	0	-0.0611987	0.00364037	0.0261194	0.104395	0.0198172	0.0214892	0.0200871	0.0162459	-0.0132939	0.0353597	-0.0456384	-0.0433974	0.029064	-0.0433772	0.0673003	-0.0526144	-0.0233655	0.0591413	-0.0144952	0.0307262
14	1467	H	H2	H	H4	0	SC	SD	0	0.100027	0.0773532	0.00475359	0.0273318	-0.0407638	0.0359485	-0.0130975	0.00937772	-0.0298705	-0.0309529	0.123193	0.0432224	0.0134777	-0.0233797	0.0108113	-0.0184147	-0.0145843	-0.00224276	-0.0236179	-0.0233352
16	1349	C	C1	H	H4	1	SC	LQD	0	-0.0683838	-0.0282806	0.0748759	-0.0493985	-0.0230012	0.00534768	-0.0167548	0.0597332	0.00975733	0.0636602	-0.0654515	-0.00505586	0.036676	-0.0335023	0.0353249	-0.0319918	0.0204635	0.0686493	-0.0102934	0.0210403
18	1325	C	C2	H	H4	0	SC	SD	0	0.104357	0.0301675	0.103195	-0.0756865	0.00351311	0.0329655	-0.0398912	-0.00943634	-0.0178188	-0.0463594	0.0607654	-0.0306856	0.0152281	-0.0541078	0.0340517	0.0711183	0.0112072	-0.0351101	0.00201653	0.0322677
20	1271	H	H1	H	H4	1	SC	LQD	0	-0.129167	0.00358703	-0.0117149	-0.0945229	0.0356633	0.0213796	-0.037167	-0.0218317	-0.0284709	0.027473	-0.0683197	0.0293063	-0.0440747	-0.0398438	0.0134369	0.00825149	0.0492183	-0.00104389	0.0126343	-0.0233929
22	1289	H	H2	H	H3	1	SC	LQD	0	-0.114602	0.0260229	-0.0152095	0.0678859	0.0181357	0.0102253	-0.0623144	-0.0194692	-0.0224626	0.0349456	-0.100017	0.00481994	-0.0083486	0.00768193	-0.0130409	-0.0418299	0.00956654	0.0333135	0.0123201	-0.00130594
23	1160	H	H3	H	H1	0	SC	LQD	0	-0.0584177	-0.116636	-0.0420849	-0.0867102	-0.04583	0.0344487	-0.0979024	0.000430826	-0.00468582	0.00554322	-0.0604416	-0.032938	0.0886899	-0.0797898	-0.011646	-0.0694722	0.0530001	-0.00219452	-0.00211517	-0.0267655
26	1193	H	H4	H	H3	0	SC	SD	0	0.0518305	0.0626152	0.0565824	-0.0386261	-0.050261	-0.0337724	-0.0174335	-0.075596	0.00209898	-0.0440168	0.0568022	-0.0274864	0.0709621	0.015875	0.0180169	-0.0142424	-0.0227976	0.0188134	-0.0321126	-0.0173065
28	1352	H	H2	H	H3	0	SC	LQD	0	-0.110949	0.0345461	-0.0472212	0.0469519	-0.0579035	-0.0115339	-0.0026468	-0.00152875	0.0316999	0.0470196	-0.0436829	0.0461339	0.0313462	-0.0751635	-0.0211409	-0.0238062	-0.0231616	0.0240125	0.00816947	-0.0236825
30	1478	H	H1	H	H3	0	SC	LQD	0	-0.10781	0.0274847	-0.00963146	-0.0126941	-0.0114224	-0.081268	0.00380502	0.00664272	0.00937507	0.0161681	-0.0933458	0.00718171	-0.0203397	0.0109103	-0.00161114	-0.00960309	-0.0559907	-0.000271258	0.0107269	-0.0133005
34	1213	H	H2	C	C3	1	SC	LQD	0	-0.0242659	-0.0423851	0.0794158	-0.0537982	0.0199264	0.0324411	0.00111098	0.0190473	-0.0357698	0.0317228	-0.0793659	-0.060359	0.044473	-0.0183134	0.0786929	-0.0370106	-0.0233265	0.0427102	-0.0403775	0.0401281
38	1269	H	H1	C	C3	0	SC	LQD	0	-0.0948387	0.00294863	-0.0579708	0.0430498	0.00375959	0.0105893	-0.0530401	-0.0249828	-0.0371065	-0.00585267	-0.0671949	0.039768	-0.0323543	-0.0268873	-0.00751857	0.0128462	-0.0104781	-0.00174076	0.0137037	-0.0226386
40	1513	C	C2	H	H4	1	SC	LQD	0	-0.0264924	-0.118857	-0.070312	0.0604072	-0.0129611	0.053821	0.0487934	-0.0175482	0.0200409	-0.0788176	-0.0273588	0.0888389	0.0116641	-0.0540444	-0.0357875	0.0295317	0.0154152	0.00377478	0.017196	-0.0146965
41	1214	H	H2	C	C1	1	SC	SD	0	0.158691	0.0184073	0.000339025	0.0711107	0.0376426	0.0242126	-0.0305201	-0.0739884	-0.0837728	0.0432018	0.10869	-0.0226832	-0.0321866	-0.0228184	0.0292886	0.00990354	-0.0428715	-0.00267685	-0.0153562	-0.0248641
42	1336	C	C1	H	H2	1	IVC	SD	0	0.0932024	-0.153055	-0.047352	-0.0130418	-0.0857295	-0.0167415	-0.165703	0.166011	0.0599803	-0.0243187	0.0746874	-0.053336	0.140782	0.0176284	-0.0533093	-0.0122258	-0.0291001	-0.00723819	0.0496731	-0.0316499
44	1273	H	H4	H	H2	0	SC	SD	0	0.122047	-0.193281	-0.0730983	0.0499976	0.00827181	0.14527	-0.00925106	-0.00861105	-0.0680007	-0.00103721	0.0427519	-0.0194106	0.00681083	-0.0743306	0.0311473	-0.0145906	-0.00101237	-0.0119374	0.00337696	-0.00855016
54	1419	H	H2	H	H3	0	SC	SD	0	0.0819411	-0.0463009	-0.077641	-0.0235613	0.0546114	-0.067494	0.0381073	-0.0318246	-0.00568371	-0.0056492	-0.018972	-0.096638	0.0633417	0.0518832	0.0138776	-0.0304175	0.0323135	-0.0009241	0.0163591	-0.000520133
56	1268	H	H1	H	H3	1	SC	SD	0	0.0410656	0.0678784	-0.0405358	-0.0920601	0.0170316	-0.00536882	-0.0635324	-0.0129751	-0.0410259	0.0582352	0.0506265	-0.137149	-0.153646	-0.0191827	-0.0101701	0.0135945	0.0270569	0.022304	0.0507533	0.0125046
58	1264	H	H4	H	H3	1	SC	LQD	0	-0.0909178	-0.0265983	-0.0105058	-0.0172144	0.0087339	-0.0441422	-0.0499877	-0.00743743	-0.0503808	-0.011915	-0.123617	-0.0115125	0.0194459	0.0595038	-0.037328	0.00289947	0.0222454	-0.00718338	-0.0126006	-0.0164701
60	1275	H	H4	C	C4	1	SC	LQD	0	0.0266709	-0.157824	-0.0369051	0.145544	0.00683416	0.0623657	-0.00358574	-0.0186818	-0.0623853	0.0133912	-0.0632148	0.0509836	0.02758	-0.0792101	0.017668	-0.0186983	-0.0189529	0.0412125	-0.0245938	-0.00176435
62	1328	C	C2	C	C4	0	SC	LQD	0	-0.0573922	0.00377525	0.0387429	0.0592107	-0.0537192	0.0461616	-0.00589336	-0.0161939	-0.00285299	0.0184858	-0.0224726	0.0945765	0.00562852	-0.020581	-0.0366465	-0.0217246	0.0335596	0.028305	-0.0303966	-0.00775838
64	1529	C	C1	C	C4	1	SC	LQD	0	-0.083653	-0.0400258	0.0455377	-0.0671418	-0.0506799	0.0530957	0.0717773	0.0520863	0.00412884	-0.0055071	-0.0797385	-0.000468909	0.0540766	0.0195551	-0.0442923	0.0242593	0.00672917	-0.0185445	0.0261689	0.00331491
66	1334	C	C1	H	H4	0	SC	SD	0	0.132935	-0.24269	-0.0204498	-0.0230678	0.0929392	0.0420805	-0.0379833	0.0460028	-0.0458368	0.0353603	0.0177879	-0.0462831	0.0622363	-0.0105365	0.00270469	0.0180473	0.0701898	-0.00862324	0.0210219	-0.0136424
70	1339	C	C1	H	H3	1	SC	LQD	0	-0.107506	-0.0259652	0.00781546	-0.00913138	-0.0428042	-0.0259727	0.0095336	0.00369975	0.00451583	-0.024479	-0.0743822	0.0448351	0.0131523	-0.0441853	-0.0240606	0.0128507	-0.0316918	-0.0102622	0.0208772	-0.000940053
71	1284	H	H3	H	H1	1	SC	LQD	0	-0.113135	0.0549988	-0.029792	-0.026552	-0.0265624	0.060181	0.0397116	-0.0123152	0.0304037	0.013941	-0.103363	0.0354873	-0.0137361	-0.0174123	-0.0218224	0.0104829	0.0376476	-0.0296068	0.00360575	0.0285268
72	1300	H	H1	H	H3	1	IVC	LQD	0	-0.106859	0.0193252	-0.0440117	0.0528235	0.0111572	0.00150486	-0.0349443	-0.0379621	-0.0104589	0.0169648	-0.143265	-0.0134826	-0.0155042	0.0753962	-0.0303992	-0.0200036	-0.000722251	-0.00649297	-0.0200588	0.00179986
73	1285	H	H3	C	C4	0	SC	SD	0	0.0693705	0.0982691	0.0270666	0.0532443	0.0338792	0.000318154	0.000401801	-0.0154303	0.0129249	0.0160492	0.118678	0.0589866	-0.0599317	0.0199283	0.00655552	-0.00987134	-0.00236992	-0.0491803	-0.0408982	-0.00149489
74	1511	C	C4	H	H3	0	IVC	SD	0	0.030412	0.0212057	0.0707801	-0.0843137	0.0448571	0.0224326	0.0392275	-0.00548989	0.0303935	-0.0226559	-0.0161304	0.0262439	-0.035939	-0.0390257	0.0568005	0.110838	0.00327587	-0.0622677	-0.0203306	-0.00695888
77	1287	H	H2	C	C2	0	SC	LQD	0	-0.0893738	0.0602983	-0.0247589	0.0412018	-0.0635275	-0.00126345	0.00159863	-0.0505165	-0.00891446	0.0203353	-0.0371755	0.0344204	0.00967567	-0.043433	-0.0290179	-0.0330895	0.00442721	-0.00416661	0.00291759	0.0128641
78	1572	C	C2	H	H2	0	IVC	SD	0	0.108597	-0.00347751	0.12045	-0.0165426	-0.0118573	-0.0164617	-0.0106553	-0.0410113	0.00315323	-0.0360529	0.0330017	-0.0404423	-0.057906	-0.0388892	0.0856257	0.00152703	0.0357655	-0.0148992	-0.0107177	-0.0107094
79	1288	H	H2	C	C1	0	SC	LQD	0	-0.0679031	-0.0163498	0.0368623	0.0634337	-0.00316542	0.0494141	-0.0580285	0.0433229	0.0362254	0.0861349	-0.0417123	-0.0119126	0.00921436	-0.0456588	-0.0158855	-0.0182219	-0.0294778	0.0130232	0.0457261	-0.0265638
80	1434	C	C1	H	H2	0	IVC	LQD	0	-0.0731384	0.0456894	-0.0114773	0.0541722	0.00367291	0.0198103	0.0349867	-0.0123639	0.00879634	-0.0368335	-0.0935053	-0.00184673	-0.00707559	0.0684508	-0.0121304	0.0488721	-0.00639458	-0.0181564	-0.00629794	-0.0180353
81	1290	H	H2	H	H1	1	SC	SD	0	0.0386789	0.0469416	0.0407571	-0.0344503	-0.0249552	-0.0263466	-0.0416049	0.0277164	-0.00873128	0.0388132	0.144921	0.114955	-0.0101917	0.034152	0.0388049	0.0381609	-0.0182153	0.0221518	0.0428691	0.0106715
82	1533	H	H1	H	H2	1	IVC	LQD	0	-0.146191	0.037886	-0.0610242	0.0497003	0.0289323	-0.0265025	-0.0335347	-0.0404389	-0.00641754	0.046363	-0.107665	0.0100711	-0.0473143	0.0241299	0.00276235	-0.00507203	0.0169257	0.0220205	-0.00249274	-0.00282151
84	1402	C	C4	H	H2	1	SC	SD	0	0.0461428	-0.0816973	0.00983902	-0.0130009	0.019197	-0.00471002	-0.0746342	0.0474768	-0.0399755	-0.0340028	0.0361332	-0.000548415	-0.0156265	-0.00965974	0.0416337	0.00409682	-0.00179289	0.0442226	-0.0236451	-0.0457509
85	1297	H	H1	H	H4	0	IVC	SD	0	0.125144	0.0346999	-0.0792713	-0.115972	0.042504	-0.00529848	0.0253991	0.0454004	-0.0153726	0.084727	0.0959289	-0.0635842	-0.126099	-0.0662095	0.0180879	-0.0102733	-0.0121749	-0.0704289	-0.00141157	0.0420941
86	1312	H	H4	H	H1	0	SC	LQD	0	-0.103042	0.0045269	-0.0400438	0.0509765	-0.00439644	-0.0208837	0.0219489	-0.0341411	0.0121347	-0.0116003	-0.0638607	0.00665758	0.0402069	-0.00180705	-0.0517618	-0.0345183	0.0257347	-0.011347	0.0216008	-0.00250877
87	1298	H	H1	H	H2	0	IVC	LQD	0	-0.116636	0.024368	-0.0414866	0.0527689	-0.00845953	0.00466793	0.0141355	-0.0329015	-0.00876005	0.0115063	-0.128058	0.033348	-0.00808865	0.0274346	-0.0484945	0.0126719	0.0230761	-0.0327171	-0.00748074	-0.00259077
88	1417	H	H2	H	H1	0	SC	LQD	0	-0.131637	0.0390261	-0.0198222	0.0249396	-0.0313735	0.00351932	0.0124745	-0.0272508	-0.0136906	0.0117551	-0.0928414	0.0434274	0.0242585	0.0222436	-0.0659108	0.0191275	0.0276755	-0.0277103	0.0124516	0.000558729
89	1301	H	H1	C	C1	1	IVC	SD	0	0.0155762	0.084942	-0.124772	-0.0189953	-0.00721089	0.00922145	-0.0464486	0.0130288	0.0425211	-0.0144468	0.160915	-0.0182165	-0.152372	-0.011793	-0.103326	-0.000477386	-0.0312169	0.0106314	-0.0411932	-0.0134097
90	1383	C	C1	H	H1	1	SC	SD	0	0.0745857	0.110272	-0.0630653	0.0178113	-0.031076	0.0296741	0.00723971	0.073315	-0.0221249	-0.0476341	0.111256	-0.0855743	-0.0358497	-0.0145913	-0.0325955	-0.0496174	-0.0275959	-0.0271935	-0.0137887	0.0288836
91	1310	H	H4	H	H2	1	SC	SD	0	0.100992	0.0416013	0.0819073	-0.0871665	-0.0120656	0.0261458	-0.0360684	-0.0623907	0.030422	0.0211296	0.0738727	-0.0685612	-0.0605718	-0.0642588	0.0576741	-0.00184189	-0.0368048	-0.0481224	0.0104912	0.0248769
93	1313	H	H4	C	C1	0	IVC	SD	0	0.099133	-0.0446959	-0.0598118	-0.0422324	-0.0363796	-0.0834893	0.0627819	-0.0589943	0.0214385	-0.0184238	0.123462	-0.0159076	0.0655934	0.0193263	-0.00239699	0.0214797	0.0300733	0.021821	-0.0161729	-0.0179656
94	1531	C	C1	H	H4	0	SC	LQD	0	-0.117144	0.0237262	0.0447276	-0.0095254	-0.0197993	-0.056758	0.0714294	-0.00367195	0.0202284	0.000125591	-0.0696385	0.04242	-0.0250256	0.0169288	-0.0258173	0.0124852	0.0279503	0.0131658	0.0062967	-0.00883668
97	1317	H	H2	H	H4	0	IVC	SD	0	0.0613606	0.0794064	0.0174169	-0.0469234	-0.0221323	-0.0176781	-0.028777	0.00242568	-0.0305509	0.0209418	0.0727129	0.0407558	-0.0527019	-0.0252346	0.0173349	-0.0280089	-0.0525603	-0.0352256	-0.0454936	-0.01429
98	1638	H	H4	H	H2	0	SC	LQD	0	-0.0716978	0.0108142	0.0932873	0.0228865	-0.0155691	-0.0406616	0.0319562	-0.0147237	-0.0131011	0.0227682	-0.0761287	0.0362674	-0.00207711	-0.0225549	0.0295654	0.0488526	-0.0546789	-0.00382773	-0.0293554	0.0201104
100	1528	C	C1	H	H2	1	SC	SD	0	0.0972477	-0.0401347	0.0168593	-0.055946	0.118269	0.02838	0.104039	0.0564404	0.0139129	-0.0177142	0.00210308	-0.142517	0.0288062	0.0385554	0.0740685	-0.00967854	0.0516221	0.00767342	0.00123632	0.00773082
101	1321	H	H2	H	H3	0	IVC	SD	0	0.11052	0.104655	-0.0468685	0.0201733	-0.0718628	0.0077466	-0.0719882	0.00978854	-0.0260269	-0.00555506	0.130173	-0.00676243	0.0717522	0.0447577	-0.0178408	-0.034842	0.0341676	-0.0403634	-0.0417598	-0.012486
102	1521	H	H3	H	H2	0	SC	SD	0	0.0751797	0.112196	0.0119972	0.0162315	-0.0254057	0.0228428	-0.0409937	0.0103021	-0.0360737	-0.00704042	0.170999	0.0809668	0.0213533	0.0500532	0.0403611	0.00378175	0.0762773	0.0119678	0.0448578	0.0350739
103	1323	C	C2	H	H1	0	SC	SD	0	-0.021581	0.0622214	-0.00374435	-0.0323802	0.0163068	-0.0561237	-0.00428099	0.0232672	-0.0377495	-0.0498037	0.0850668	0.0390233	-0.0572639	0.0737377	-0.000106585	0.0172835	-0.0050077	-0.0156128	0.00123161	-0.0223958
104	1536	H	H1	C	C2	0	IVC	LQD	0	-0.14501	-0.0028789	-0.00467814	-0.0500863	0.0224413	0.00572727	-0.0585648	-0.0198043	-0.0470205	0.0247749	-0.136329	-0.0456543	-0.0259388	0.0547158	0.0147034	-0.0131476	0.0149937	0.0181785	0.0123044	-0.00966402
107	1326	C	C2	C	C1	1	SC	LQD	0	0.0357689	-0.0991274	0.0851262	0.0318563	0.0140853	0.00695797	-0.0311146	0.0563027	0.0175746	-0.0274684	-0.108094	0.0281342	0.0541913	0.0450023	-0.0491439	0.023571	-0.00983531	-0.0110683	0.00633125	0.0315054
108	1432	C	C1	C	C2	1	IVC	SD	0	0.129974	0.0760738	-0.059353	0.0455088	0.0341175	0.01012	0.0299105	0.0742933	-0.00622839	0.00325791	0.189462	0.0986719	-0.0873693	0.0490729	-0.028709	0.0052156	-0.0191206	-0.0229828	0.0221613	0.0137367
109	1327	C	C2	C	C4	0	SC	SD	0	-0.0117624	0.0425378	0.0162987	-0.109229	0.0206228	0.00803518	0.0249997	0.0534309	-0.0167927	-0.078701	0.0308531	-0.062273	-0.0493416	0.00581519	0.0137111	-0.0124383	0.0127318	-0.0650021	0.0300828	0.0191156
110	1508	C	C4	C	C2	0	IVC	LQD	0	-0.0988416	-0.0804313	-0.0328408	-0.100255	-0.0067093	0.0660506	-0.0220644	0.034508	-0.00357187	-0.0732812	-0.0974972	0.0102801	0.00732801	-0.00955199	-0.0107258	0.0196624	0.0142323	-0.0239067	0.00900101	0.0120405
111	1329	C	C2	H	H2	1	SC	LQD	0	-0.103932	-0.00368528	-0.0358845	0.0395557	-0.0551484	0.028611	0.00809477	-0.0276561	-0.0114161	0.000263644	-0.0621141	0.054647	0.0100617	0.0322446	-0.0731865	-0.0273024	-0.00266631	0.0018514	-0.00200726	-0.0189313
113	1330	C	C2	H	H4	0	SC	LQD	0	-0.0767533	0.000877209	-0.0387556	0.0253349	-0.0684295	0.0367612	-0.00290964	-0.018882	0.0236738	-0.00153965	-0.0155782	0.0208208	0.0741402	0.0218118	-0.0855372	-0.0295604	0.0379191	-0.0104637	0.000242675	-0.0418178
114	1457	H	H4	C	C2	0	IVC	LQD	0	-0.135401	0.0231937	-0.026774	0.0484478	-0.0168723	-8.93067e-05	0.0016122	-0.0606548	0.00313216	0.0422472	-0.126062	0.00299452	0.00653341	0.0371997	-0.00633791	-0.0039158	0.00651129	0.0157901	-0.0231176	0.0155535
115	1331	C	C2	C	C1	1	IVC	LQD	0	-0.0899335	0.0141709	0.0629967	0.0382965	0.0185247	0.0591634	-0.0132361	0.019297	-0.0146946	0.0313307	-0.0946598	0.0286151	-0.0271372	-0.00918899	0.0216293	-0.011467	0.0261706	0.0403573	-0.0135257	0.0394247
116	1391	C	C1	C	C2	1	SC	SD	0	0.123002	0.0560509	0.078383	-0.000176862	-0.0009344	-0.0624673	0.00877253	0.0326943	0.0058998	-0.0444259	0.138523	0.0412524	0.107879	0.04452	-0.00156178	-0.032161	0.0209173	0.0166024	0.0199686	0.0265104
117	1332	C	C2	C	C3	1	IVC	SD	0	0.153177	-0.0101914	-0.0397998	0.100841	0.0245471	0.000478761	0.000509835	-0.0350807	-0.0116862	0.0599996	0.13265	-0.0388229	-0.00431385	0.00701552	0.0317277	-0.0387154	0.0131684	0.0315854	-0.0410361	-0.0160067
118	1601	C	C3	C	C2	1	SC	LQD	0	-0.0585549	0.0647593	0.033507	0.0471219	-0.0800188	0.0471585	0.0345593	-0.00511343	0.00522302	0.0156962	-0.0338019	0.049318	0.0255651	-0.00543504	-0.0356169	0.0019388	-0.0183944	0.000786822	-0.0190342	0.0185769
121	1344	C	C1	C	C4	1	IVC	SD	0	0.202055	-0.0980696	-0.00531318	0.0178082	0.0143002	-0.0664281	-0.0274603	0.0633085	-0.00189067	0.0327993	0.132506	0.0459009	-0.00529771	0.0212021	-0.00219194	0.0141523	-0.025031	-0.0141026	0.00228455	-0.0272559
125	1348	C	C1	H	H1	1	SC	LQD	0	-0.0964555	0.0410477	-0.016371	0.0388084	-0.0302429	-0.0132698	0.0535171	-0.0142611	0.0214363	-0.00492202	-0.131762	-0.0130904	0.005811	0.071688	-0.0427081	0.0274362	-0.00877945	-0.0476092	0.000213297	-0.0242667
127	1353	H	H2	C	C4	0	SC	SD	0	0.0560508	0.0856481	-0.0564241	0.0152341	-0.0340926	-0.00938725	-0.0414767	-0.00236496	0.0374628	-0.0510913	0.103845	0.0905039	-0.0117819	-0.0242247	0.0152776	0.00635403	-0.0708671	-0.00208625	-0.0200726	-0.0420695
128	1728	C	C4	H	H2	0	IVC	LQD	0	-0.0927652	-0.084818	0.0385676	0.0105523	-0.0295619	-0.0292242	-0.0444858	-0.00919733	-0.00310583	-0.0380324	-0.0714499	0.0616656	0.0163274	0.0382591	-0.0528365	0.0186967	0.0183513	-0.0135685	-0.0126202	0.0306914
129	1355	H	H2	H	H4	1	IVC	SD	0	0.139189	0.0165855	-0.06891	-0.0451771	-0.0584214	-0.061896	0.0621716	0.0367068	-0.033772	0.0413288	0.100295	-0.101618	0.0557688	0.0118219	0.0117086	-0.040051	-0.0218117	-0.0576798	-0.0294081	-0.0147134
130	1507	H	H4	H	H2	1	SC	LQD	0	-0.0486552	-0.0327599	-0.036574	-0.0499675	-0.0943511	-0.0236855	-0.0191375	0.0054745	-0.0041772	-0.0596609	-0.0669377	0.0178116	0.0612326	-0.067408	-0.0375661	0.00310052	0.0235419	-0.0373638	0.00932466	-0.00450397
131	1379	C	C1	H	H3	0	SC	SD	0	0.0434323	0.0721381	-0.0640759	0.0186548	-0.00367579	-0.000491558	0.104203	-0.00528661	0.0540446	-0.0192121	0.01329	-0.0522255	0.0760062	0.0906897	-0.0332822	0.0112677	0.000896689	-0.0170781	-0.0298181	-0.0264
133	1380	C	C1	C	C3	0	IVC	SD	0	0.0838585	0.0788558	0.0134886	-0.120929	-0.0366319	0.04378	0.0194099	0.0337785	-0.00872728	-0.0175911	0.106377	-0.147865	-0.051209	-0.0670997	-0.0736637	-0.0123634	-0.00678655	-0.00969412	0.0235579	0.0828935
134	1764	C	C3	C	C1	0	SC	SD	0	0.183028	0.0646205	-0.0455946	0.0629796	-0.030685	-0.00323637	-0.00832555	-0.0144991	0.0516252	0.0760475	0.17225	-0.147711	-0.00634738	0.0322594	-0.0294359	-0.0655688	0.00334583	0.0447816	-0.0451777	-0.00279629
135	1381	C	C1	H	H2	1	IVC	LQD	0	-0.133916	0.00895923	-0.057757	0.0383776	-0.0542257	0.0203684	0.0198411	0.0585653	0.0511941	-0.00760478	-0.0964413	0.0250899	0.0383262	0.0467382	-0.06356	-0.0236913	-0.00776063	0.02615	-0.0114629	-0.028233
136	1420	H	H2	C	C1	1	SC	LQD	0	-0.0526157	-0.0423475	0.0239662	-0.0645447	-0.0550609	0.0260551	0.0077717	-0.0368578	0.0112253	-0.0132029	-0.0607119	-0.0237508	0.034793	-0.0191735	-0.00833218	-0.023152	0.032955	0.0050659	0.0245525	-0.00111301
137	1384	C	C1	C	C2	0	IVC	SD	0	0.0346812	0.0559672	-0.0143956	-0.0223658	0.00988292	0.104444	0.0350165	0.0555277	-0.0394469	-0.00564734	0.0241637	-0.0957012	-0.00721805	0.0126138	0.0058092	-0.0686659	-0.0126861	-0.0427934	0.0339539	0.0218552
138	1517	C	C2	C	C1	0	SC	LQD	0	-0.126845	-0.0319558	-0.0655795	0.0450392	-0.05373	0.0598119	-0.00163037	0.0416012	0.00673345	-0.0728156	-0.0600318	0.0568085	0.0112818	-0.011295	-0.0575358	-0.0288859	0.0340874	0.015792	0.0133205	-0.0141883
140	1505	H	H4	C	C1	1	SC	SD	0	0.0775365	0.00964572	-0.0490045	-0.086375	-0.00687148	0.0282718	0.113739	0.0737401	-0.00352921	0.0084378	0.0771668	-0.136074	-0.0699805	-0.0273579	-0.0612162	-0.0244	-0.00794392	-0.0344023	0.0396009	0.0608128
141	1386	C	C1	C	C3	1	IVC	LQD	0	-0.0922407	0.0161696	0.0429968	-0.0023175	-0.021927	0.000707621	-0.008443	0.0442822	-0.0285515	0.0407089	-0.0975266	0.0291805	0.0188833	0.0260349	-0.0361539	-0.0137219	-0.0105432	0.0118964	0.0189168	0.0202894
142	1566	C	C3	C	C1	1	SC	LQD	0	-0.0246298	-0.0746911	0.060691	0.0566919	-0.0208669	-0.0351057	-0.0470149	0.0248096	-0.0271884	0.0192047	-0.0614869	0.0615942	0.00318763	-0.083047	0.0472962	-0.00173517	-0.0122056	0.0423736	-0.0234897	0.0259354
144	1705	H	H1	C	C1	1	SC	LQD	0	-0.132904	-0.00813423	-0.0375744	-0.0969068	-0.00486543	0.0574792	-0.0149925	0.0167195	-0.0301714	-0.0268921	-0.0717994	-0.0609866	-0.0237681	0.00616858	0.00576903	-0.0629624	0.0166192	-0.0131098	0.0250651	0.0037721
145	1388	C	C1	C	C4	0	IVC	LQD	0	-0.0301546	0.0215509	0.0733815	0.0987837	0.0452766	0.0157258	-0.0093975	0.0303205	0.00994142	0.00283787	-0.0396538	0.0711257	-0.0200614	0.00137126	-0.011517	0.0163224	-0.00822188	0.0111842	-0.002995	0.0323645
146	1603	C	C4	C	C1	0	SC	LQD	0	-0.102844	-0.0523695	-0.0189777	-0.016777	-0.0297525	-0.00151607	-0.0189275	0.00480042	-0.0286331	-0.0180462	-0.0992114	0.0326674	0.00662467	-0.0275253	-0.0212953	-0.0301852	-0.0153621	0.026199	0.0130492	-0.0240601
147	1389	C	C1	H	H3	1	SC	SD	0	0.105741	0.0896785	0.0225364	-0.0429426	-0.00681266	-0.036637	0.0227254	0.06816	-0.0218901	-0.0223803	0.153694	0.0228586	-0.0576757	0.0117159	-0.0112585	-0.0225266	0.00348646	-0.0016112	-0.0111668	0.00895812
149	1390	C	C1	H	H2	0	IVC	SD	0	0.042076	0.0519308	0.0580476	-0.0780225	0.0158417	0.0306598	0.0282397	0.0738538	-0.0105932	-0.0273649	0.0332691	-0.0964474	0.00174884	0.0177736	0.00505319	-0.0567972	-0.0179157	-0.0665261	0.03141	0.0255174
150	1487	H	H2	C	C1	0	SC	SD	0	0.144854	0.0407994	-0.0345278	0.0428694	-0.0831684	0.0259402	-0.0984334	0.0075355	-0.00106697	-0.0157275	0.17151	0.0136132	0.160537	0.0795448	0.02213	-0.019483	-0.0235801	0.00368808	0.000944616	0.0193838
151	1400	C	C4	H	H1	0	SC	LQD	0	-0.116187	-0.0333347	-0.0686015	-0.0152799	-0.019241	-0.028824	0.028374	0.0162009	-0.0635066	-0.0442816	-0.0639409	0.0216988	0.0276339	-0.0138548	-0.0336132	-0.00253503	0.0240104	0.00149353	0.00412016	-0.0200144
152	1535	H	H1	C	C4	0	IVC	SD	0	-0.0458666	0.0387045	-0.0712285	-0.0535918	0.0411218	-0.0403483	-0.0721304	-0.0037179	-0.0362013	-0.0225393	0.0356262	-0.0126842	-0.0622593	0.0655324	0.00942778	-0.0231937	0.00176338	0.0225541	-0.00138589	-0.0545244
155	1403	C	C4	C	C1	0	IVC	LQD	0	-0.107794	0.00209235	-0.0280592	0.0906492	0.0617389	-0.00270406	-0.0333428	0.072825	0.0331515	-0.0408511	-0.122858	-0.00211321	-0.0609927	0.0704386	0.0148938	-0.0328607	0.00600216	0.0391312	-0.0284721	0.0049862
156	1436	C	C1	C	C4	0	SC	LQD	0	-0.097856	0.0476284	-0.0285708	0.0594529	0.0268112	0.0155489	0.00179325	0.0139254	-0.0246883	-0.0500481	-0.0584844	0.0435071	-0.0393025	0.0113352	-0.0497356	-0.0148968	0.0156461	-0.0233033	-0.00803731	-0.0207622
157	1412	H	H2	C	C3	1	SC	SD	0	0.125978	-0.135355	-0.0261693	-0.041054	0.0749479	0.0282265	0.0362904	0.00278638	0.00647243	0.0858887	0.0233793	-0.0510597	0.0249457	-0.0392236	0.0603414	0.0156025	-0.00378621	0.0378429	0.0265369	-0.0304079
158	1600	C	C3	H	H2	1	IVC	SD	0	0.156165	0.0313917	0.0618199	-0.00340903	-0.0669181	-0.0654917	-0.0535137	-0.020656	0.0517375	0.0127111	0.154181	0.0323479	0.0372052	-0.0104717	-0.00762045	-0.0420263	-0.0131069	-0.0441223	-0.0284188	0.00268736
159	1413	H	H2	C	C2	0	IVC	LQD	0	-0.0979242	-0.0192538	-0.0367613	-0.000665359	-0.00948633	0.0710698	0.027025	-0.00184758	-0.0146384	-0.0627053	-0.0943792	0.0109965	-0.00626958	0.00154928	-0.0177061	0.0206185	0.0383081	-0.0126002	0.032542	-0.0159718
160	1512	C	C2	H	H2	0	SC	SD	0	0.0761996	-0.010346	0.0205424	0.0631731	0.0118964	0.0443771	-0.0507797	0.0129414	0.0160976	-0.0958377	0.190242	0.085287	0.0911601	0.0600638	0.0609426	-0.00970953	0.0124054	0.0146358	0.062514	0.0511488
162	1545	C	C1	H	H2	1	SC	LQD	0	-0.0969665	0.0442129	0.00497011	0.0694015	0.00198557	0.0161696	0.0430409	0.0382011	0.0023388	0.00825227	-0.0985553	0.0249937	0.00919142	0.00571922	-0.0262577	0.011318	-0.0286163	-0.00197723	0.00644666	0.00199032
163	1416	H	H2	H	H4	0	SC	LQD	0	-0.0506855	-0.00564752	0.0452927	0.0138844	-0.0675199	-0.0147782	0.0191918	-0.00588687	-0.088639	0.000237782	-0.054826	0.0471981	0.000448527	-0.0438441	0.0148532	0.017681	0.0517691	0.00256544	-0.0459642	0.0320012
164	1797	H	H4	H	H2	0	IVC	LQD	0	-0.0491802	0.0362722	0.0747666	0.0850824	0.0259396	0.00916577	-0.000598943	0.013907	0.00947732	0.0117718	-0.0617466	0.108009	-0.0368487	-0.00516006	0.00287867	0.0801243	0.0175598	-0.0180321	-0.0558217	0.023411
165	1424	H	H2	H	H1	0	SC	SD	0	0.108267	0.0877436	-0.00902168	-0.0485101	-0.0737129	-0.0407688	-0.0295499	0.0261823	0.0209218	0.0340931	0.118377	0.0174229	-0.0139037	-0.023151	-0.00421538	-0.0154293	0.0200356	-0.0385582	-0.0362261	-0.0277947
166	1479	H	H1	H	H2	0	IVC	SD	0	0.0724129	0.0735156	-0.0114377	-0.0320417	-0.0356247	-0.0702224	-0.0102039	0.0456031	-0.033628	0.0127382	0.0578293	0.0194299	-0.0979943	-0.0102958	0.0473078	-0.0692932	-0.0335777	-0.0134678	-0.0406497	-0.0277891
168	1553	H	H3	H	H2	1	SC	SD	0	0.12545	0.0163757	0.0299974	-0.101	-0.0150486	0.0339996	-0.00191292	-0.023331	-0.0165521	0.0342148	0.0496059	-0.0572414	0.0196421	-0.0359029	0.0166998	0.0576161	0.0248888	-0.0238263	0.00574315	0.0319882
169	1433	C	C1	H	H3	0	SC	LQD	0	-0.0680208	-0.0336268	0.028014	-0.00421941	-0.0411845	-0.0379256	-0.0138862	-0.00653041	0.0456255	-0.00460935	-0.0566397	0.0322787	0.0556968	0.00952542	-0.0486931	0.023636	-0.0393904	0.00716024	0.0192689	-0.0235003
171	1435	C	C1	H	H4	0	IVC	SD	0	0.0620683	0.0231489	-0.0330891	-0.124855	0.00199721	-0.00519121	0.00442946	-0.00621386	0.0552938	-0.020552	0.123184	-0.192154	-0.000667959	-0.0649747	-0.110676	0.0300323	0.00231051	0.0270107	0.0144202	0.0713776
172	1665	H	H4	C	C1	0	SC	LQD	0	-0.10537	0.00292724	0.0199252	-0.00594222	0.0142868	-0.0499011	-0.00468612	-0.00936727	0.0269573	-0.0233504	-0.0978294	-0.0164238	0.0276686	0.0281283	-0.0279781	0.0291657	0.0145874	-0.0235696	0.0150563	-0.0137826
173	1458	H	H4	H	H3	0	IVC	SD	0	0.115708	-0.0338696	-0.11362	-0.0799058	0.0366118	-0.0621115	0.0159336	0.026784	7.65827e-05	-0.0179745	0.0351994	-0.107994	-0.0398172	-0.01085	0.0331984	-0.0102982	-0.0101567	-0.0253918	0.0501299	0.00464274
174	1525	H	H3	H	H4	0	SC	LQD	0	-0.0623964	-0.0775383	0.017572	-0.0625842	0.0276035	0.013348	0.0274096	0.00058833	0.00313801	-0.0458359	-0.0875656	0.0301867	0.0386671	-0.0378973	-0.0219608	0.0190985	-0.0181028	-0.0282162	0.0413306	0.00937643
175	1459	H	H4	C	C1	1	SC	LQD	0	-0.109701	-0.0146495	-0.0897028	0.0509134	-0.0276432	-0.013057	-0.0261972	6.447e-05	0.0556958	0.0174945	-0.0528818	0.0550536	0.0152547	-0.0506697	-0.0176293	0.00933319	-0.0383616	0.0212662	0.0335237	-0.0306903
176	1542	C	C1	H	H4	1	IVC	SD	0	0.0371824	0.0422041	0.101288	-0.0481363	0.112613	0.0219116	-0.00173258	0.0150827	0.0441599	0.0210068	0.012598	-0.00907335	-0.0932032	-0.0303941	0.067881	0.0626885	0.00592993	-0.0416825	-0.0317916	0.0160721
177	1460	H	H4	H	H1	1	SC	LQD	0	-0.109039	-0.0266233	-0.0472905	0.00685674	0.0240948	0.0448167	-0.00110623	-0.0210056	0.0476848	-0.0130591	-0.104173	0.019673	-0.012646	-0.0154834	-0.00125574	-0.0205358	0.0382064	0.00571837	0.0169699	0.0148273
178	1537	H	H1	H	H4	1	IVC	SD	0	0.0100679	0.0331998	-0.0912961	-0.067536	0.0513116	0.0733786	-0.0606811	0.00842547	0.109668	-0.0232984	0.0262174	-0.11474	-0.0703172	-0.018076	0.0109175	0.0562845	0.0385895	0.0347406	0.0242601	0.0222524
180	1486	H	H2	H	H4	1	SC	SD	0	0.155815	0.0199111	-0.0641903	0.0474259	-0.02863	0.000920193	-0.0162787	-0.067003	0.0064572	0.0736186	0.142223	-0.026302	0.00331432	-0.0376374	0.0301135	0.0515713	-0.00709394	0.00478683	-0.0386426	-0.0512609
181	1468	H	H2	C	C4	1	SC	SD	0	0.194294	-0.0463432	0.0596501	0.000750986	-0.0336841	-0.0307543	0.032599	-0.0526211	0.0149465	-0.0140062	0.161039	0.0154773	0.0767837	-0.0323873	0.0150253	0.0336298	-0.032022	0.0160059	0.00244103	-0.0387909
182	1606	C	C4	H	H2	1	IVC	LQD	0	-0.0877005	-0.0601689	0.0130881	0.0239351	0.00636694	-0.0583925	-0.00408406	-0.00450185	0.00827115	-0.0146214	-0.127385	0.0131525	-0.0241188	-0.0203699	0.0199624	-0.018293	-0.0256118	0.0156833	0.00228674	0.0100649
183	1477	H	H1	H	H4	0	IVC	LQD	0	-0.105363	-0.0156696	-0.0159997	0.00998449	0.0277641	-0.0955911	-0.010254	0.0080136	0.0266707	0.0217306	-0.0765223	0.0320824	-0.0231483	0.0348343	-0.023549	-0.0230011	-0.0473634	0.0168916	-0.00593439	-0.0250515
188	1539	H	H1	H	H2	1	SC	LQD	0	-0.129807	0.00672899	-0.0650703	0.0572721	0.0267904	-0.0298387	-0.0213399	0.0120257	0.0377116	-0.00457638	-0.107851	0.0175126	-0.0111524	0.019663	-0.0240033	0.0177962	-0.00281792	-0.0206719	-0.00333036	0.00743128
189	1514	C	C2	H	H3	0	IVC	SD	0	0.122037	-0.0711953	0.0356717	-0.078672	-0.00347705	0.0694439	0.0481099	-0.000252216	-0.0537305	-0.0131564	0.0516412	-0.0278218	0.0256535	-0.053299	0.0182109	0.0661177	0.0427901	-0.0454923	0.000518096	0.0206417
190	1800	H	H3	C	C2	0	SC	SD	0	0.0482278	0.0340092	0.00172338	0.0372065	-0.00681191	0.0348594	-0.0548903	0.0276197	-0.0556356	0.00455573	0.129771	0.147896	-0.0110494	0.0969226	-0.0236845	0.00505981	0.0566784	-0.030875	0.0869639	0.0315637
195	1538	H	H1	C	C1	0	SC	SD	0	0.0231165	0.0517083	-0.0415354	-0.0186813	0.0687698	0.0789586	-0.013976	-0.0025613	0.0412767	0.0349817	0.0493782	-0.201445	-0.0542916	-0.000843948	-0.0394779	0.013555	-0.00460935	0.0790426	0.0455959	0.03969
196	1544	C	C1	H	H1	0	IVC	LQD	0	-0.111891	0.0677824	0.009258	0.0705028	0.0539227	-0.010105	0.0302383	0.00645674	0.068427	-0.0145456	-0.140925	-0.0159072	-0.0196319	0.0751719	0.0145148	0.0271227	0.00195558	0.00803536	-0.0108848	0.0266062
197	1543	C	C1	H	H3	1	IVC	SD	0	0.041053	0.139467	-0.036463	0.0021608	-0.0110837	0.00126475	0.00319715	0.0106996	0.0357178	-0.0172825	0.141107	0.0178524	-0.0738953	0.00660476	-0.0209966	-0.0251115	-0.0304864	-0.0392914	-0.0239258	-0.0151169
198	1802	H	H3	C	C1	1	SC	SD	0	0.138428	0.0110085	0.0389142	0.050186	0.103677	0.0626136	0.0516949	0.00242184	0.0569624	0.00061063	0.074081	-0.0320391	-0.0893278	-0.0278388	0.0665595	0.0508766	-0.00305052	-0.0700895	-0.0250425	0.031339
200	1711	C	C2	C	C1	1	IVC	SD	0	0.139194	-0.0870297	0.0685822	0.125136	-0.0291868	0.0486836	-0.0522067	-0.0398398	0.0604829	-0.0281294	0.0840481	-0.0996957	0.092461	-0.0131957	0.0273504	0.0241755	-0.0090242	0.0142554	-0.01026	-0.0231296
201	1565	C	C3	C	C2	1	IVC	SD	0	0.170194	-0.00147799	-0.0535631	0.0525129	-0.0666682	0.0271023	0.000182388	-0.0653071	-0.0185146	0.0351251	0.163013	-0.046128	0.111414	0.0412679	-0.061755	-0.0364849	-0.00684517	-0.0079045	-0.0438572	-0.00349834
202	1570	C	C2	C	C3	1	SC	LQD	0	-0.0710573	-0.0772186	0.00849768	-0.0673174	-0.057172	0.0216605	0.0492159	-0.0127435	-0.00234115	-0.035045	-0.0742183	0.0391558	0.03028	-0.0326315	-0.0366529	0.0386973	0.0216404	-0.0391829	0.0454034	0.00132734
203	1567	C	C3	H	H4	0	IVC	SD	0	0.105489	-0.00883562	-0.0940992	0.0163381	-0.0827683	0.0370884	0.0522533	0.0326886	0.00730655	0.0316161	0.148519	0.0614841	-0.0582905	-0.0531236	-0.0767297	0.0167081	-0.0518988	0.0098907	-0.05141	0.000812825
204	1576	H	H4	C	C3	0	SC	SD	0	0.0229186	0.0127792	-0.0356927	0.0349882	0.0700115	0.0126268	-0.0148165	-0.0220604	0.03357	-0.0535851	-0.0169216	-0.0405918	-0.076328	-0.0108928	0.0466583	-0.046752	-0.00377979	0.0248806	0.0268397	-0.0345563
205	1569	C	C2	H	H1	0	SC	LQD	0	-0.0732484	-0.0251828	0.0069136	-0.0693434	-0.0511645	0.0499197	0.00317403	0.0589462	-0.07166	0.00902022	-0.104468	0.000696092	0.0318139	-0.0178208	-0.0256139	0.00988949	-0.0424506	-0.0314817	0.0401712	-0.00918258
206	1710	H	H1	C	C2	0	IVC	SD	0	0.0351862	0.122812	-0.0557739	0.00581921	0.00736859	0.0115429	-0.0604861	0.028161	-0.0272056	0.0194341	0.111409	-0.0513141	-0.0859072	0.0563381	-0.0565914	0.0300614	-0.0103484	0.00144768	-0.000786209	-0.0449946
207	1571	C	C2	H	H4	0	IVC	LQD	0	-0.078698	-0.00388055	-0.0256682	0.0432247	-0.0388766	0.0291786	0.00288499	-0.0297413	0.006974	-0.0120069	-0.117877	-0.0135585	0.0288201	0.0299743	-0.0428104	-0.0264502	0.0268787	0.00991119	-0.00689417	-0.0146881
208	1580	H	H4	C	C2	0	SC	SD	0	0.0641074	0.0806985	-0.0439976	0.00597654	0.0313248	0.00206963	-0.0325442	-0.0347626	0.0379744	-0.0474673	0.055082	-0.0805703	-0.0306892	0.00417965	0.0609859	0.0221209	0.0310711	0.0133761	0.00666235	-0.0181613
209	1573	C	C2	C	C4	0	IVC	SD	0	0.0662118	-0.0536612	-0.0104368	-0.0771644	0.0293373	0.0166213	0.0711005	-0.0408327	-0.00356073	0.0123828	0.018872	-0.0735352	0.0244292	-0.00291693	0.0364014	-0.00969557	0.033484	-0.0431487	-0.0054174	0.00771494
210	1591	C	C4	C	C2	0	SC	SD	0	0.0727025	0.0172755	-0.00646172	-0.0567465	-0.0310932	-0.0474231	0.0307075	-0.0472465	0.0561059	-0.041159	0.102228	-0.190887	0.0341818	-0.0735956	-0.0760548	0.0606723	-0.0115428	0.0373234	0.00537755	0.0547173
211	1574	C	C2	C	C1	1	IVC	SD	0	0.128666	-0.0657841	0.113641	-0.0287551	0.0277929	0.0252384	-0.0657735	-0.0695249	0.0027284	0.0299094	0.0807861	-0.0821705	-0.0077143	-0.035538	0.0716941	0.067365	0.02834	-0.027117	-0.00130966	7.75986e-05
212	1597	C	C1	C	C2	1	SC	LQD	0	-0.0791747	0.0318757	0.0842522	0.0171776	-0.0280775	0.0777245	0.0456655	0.0214908	0.0806089	0.0698977	-0.126353	-0.0214976	0.0679276	0.0266955	-0.0161972	0.0197134	-0.0678214	0.00963446	0.00700663	0.00195414
214	1708	H	H1	H	H4	1	SC	SD	0	0.00742052	0.0882805	-0.00835441	0.0329944	0.0438	0.0190925	-0.0405134	0.0214272	-0.0198168	0.00809766	0.0481396	0.0561338	-0.0521892	0.0811136	-0.0162592	0.0287889	-0.00241236	-0.0406239	-0.0206265	-0.0558484
216	1590	C	C1	H	H4	1	SC	SD	0	0.0673661	0.0946429	-0.0426268	0.0321245	-0.000853826	0.0251097	0.10995	0.0164516	-0.031482	0.021545	0.0888779	0.0729717	-0.0487947	-0.0125563	-0.00994919	-0.0429481	-0.04348	-0.0482318	-0.0450979	-0.0151313
218	1804	H	H3	H	H4	1	SC	SD	0	0.0569338	0.0360982	0.0690006	0.0032711	-0.00852741	-0.0531193	-0.00506491	-0.0010524	0.0217277	0.0279976	0.0692151	0.016034	0.0859648	0.0752836	-0.0204924	0.0218364	0.00205419	-0.00187099	-0.0330661	0.0174518
220	1729	C	C4	H	H4	1	SC	LQD	0	-0.040999	-0.031047	0.00111181	0.061651	-0.0182539	0.0502619	-0.0302051	0.0179144	-0.0400484	-0.0087568	-0.0701555	-0.00288176	0.0335658	-0.0664492	0.022966	-0.0323095	0.00438654	-8.99871e-07	-0.0109758	0.0231145
222	1649	C	C2	C	C4	1	SC	LQD	0	0.0709105	-0.171755	0.0569237	0.0353328	-0.0544052	0.0126254	0.026335	-0.0140219	-0.0376642	0.000839129	-0.0304961	0.0545904	0.0771501	-0.0226768	-0.00970577	0.0407279	-0.00126188	0.00739196	-0.0445758	0.0110674
224	1780	H	H1	C	C4	0	SC	SD	0	-0.0151334	-0.0235841	-0.0372134	0.0861972	0.109004	0.037938	-0.050842	0.024747	-0.0041852	0.01772	0.106132	0.19314	-0.075248	0.0748804	0.0818513	-0.0142642	0.054286	0.0798377	0.0383078	0.0286822
226	1790	H	H3	C	C4	0	SC	LQD	0	0.0498728	-0.115447	-0.0245807	0.020538	-0.0358944	-0.00464297	0.0223675	0.00424105	-0.0842751	0.0423703	-0.0402847	0.019614	0.0589223	-0.0486103	-0.0356582	-0.00658658	0.0666014	-0.0230789	-0.0222049	-0.00821175
228	1756	H	H4	C	C4	1	IVC	SD	0	0.0741248	-0.00122694	-0.00772739	-0.0270835	0.0296055	-0.0459591	-0.0475726	0.00375788	0.00437535	-0.0484233	0.0864872	-0.0473726	0.0443737	0.0132974	0.0125912	-0.0165247	-0.00516298	-0.00906363	-0.035885	-0.0232598
229	1586	C	C1	H	H3	0	IVC	SD	0	0.0700578	0.120211	-0.0063275	0.0141831	-0.0229705	0.0229432	0.010076	0.00154268	0.0265763	0.00781021	0.112798	-0.0116055	0.0787538	0.064611	-0.0295388	-0.0328751	-0.00807204	-0.0246376	-0.0269138	0.00605508
231	1587	C	C1	C	C4	0	IVC	SD	0	0.116286	0.132187	0.00744845	0.0146131	-0.053586	0.0367597	-0.000810912	-0.0113345	-0.037873	-0.0526518	0.105029	0.0494878	0.017937	-0.00392378	-0.00893846	-0.00701031	-0.0294359	-0.0472471	-0.0425823	0.0111019
232	1733	C	C4	C	C1	0	SC	SD	0	0.0505219	0.0552665	-0.0348164	0.0407212	0.00452564	0.0337041	0.0592872	0.0143959	-0.0503142	0.0272729	0.0545592	0.0690203	-0.020585	0.00814358	0.00863093	0.0240639	-0.00325462	0.00306332	-0.0345292	-0.0149656
233	1588	C	C1	C	C3	0	SC	SD	0	0.0539199	0.136315	0.00318003	0.0224439	-0.0220398	0.0217788	0.0296585	0.0112366	0.0226406	0.00097002	0.153452	0.0137014	-0.111339	-0.0185372	-0.132786	0.0246304	-0.0678981	0.00874066	-0.0425248	0.0297816
234	1816	C	C3	C	C1	0	IVC	LQD	0	-0.0989635	0.0294436	-0.0146905	0.0721702	-0.0278812	-0.0132863	0.0146808	0.027324	0.0173931	-0.0115009	-0.0798665	0.0492526	0.0379948	-0.00410278	-0.0335678	0.0205252	-0.00359691	0.000465269	-0.00949557	0.0207433
235	1589	C	C1	H	H1	0	IVC	SD	0	0.0390785	0.124317	-0.0104256	0.0320589	0.0176482	-0.00993339	0.01517	-0.00528172	0.0189286	-0.0502548	0.0822597	0.0451844	0.0243209	0.00499555	-0.00361497	-0.00615859	-0.0439842	-0.03222	-0.0298047	-0.00212061
236	1777	H	H1	C	C1	0	SC	LQD	0	-0.138777	-0.00617753	-0.0483609	-0.0259235	0.0513148	0.0828284	-0.0471924	-0.0072433	-0.00856536	0.00823442	-0.136175	-0.050861	-0.0139255	0.0471037	0.000784379	0.00348747	0.0369357	-0.0239063	0.0193917	-0.00929719
237	1592	C	C4	H	H4	0	IVC	SD	0	0.0343735	0.0351214	-0.0352448	-0.0407929	0.0182412	-0.0865273	0.00111876	0.0132452	0.0644202	-0.0357984	0.087919	-0.0735412	-0.0289082	0.0150555	-0.000575892	0.0473095	-0.0137323	-0.000260989	-0.00864251	-0.028037
238	1664	H	H4	C	C4	0	SC	LQD	0	-0.139265	0.0103466	-0.0361162	-0.0143843	-0.000915296	-0.0667116	-0.0161866	0.00242911	0.0178014	0.0504254	-0.120918	-0.00762425	-0.0315755	-0.0180307	-1.86898e-06	-0.0239941	-0.029047	0.0088131	0.0352828	-0.0370256
239	1593	C	C4	H	H3	0	SC	LQD	0	-0.082435	-0.0374077	0.0114989	-0.0118202	-0.0783885	-0.0822317	0.0506392	0.00341184	0.0693893	-0.0267534	-0.102155	0.00747108	0.0550947	-0.00634589	-0.0453541	0.0281777	-0.0381746	-0.0168258	0.0292398	-0.0362157
240	1787	H	H3	C	C4	0	IVC	SD	0	0.10598	0.0627846	0.0446905	-0.0554333	-0.0201751	-0.0544887	-0.0352011	-0.0013433	-0.00274102	0.00270721	0.0680577	-0.0041554	-0.0695204	0.00794597	0.00428668	-0.0139614	0.0196103	-0.0600289	-0.0236107	-0.00607568
241	1594	C	C4	H	H1	1	IVC	SD	0	0.0621524	-0.0200664	-0.0293266	-0.0818766	0.0750183	0.000995066	0.0745967	-0.033169	0.011233	-0.0274442	0.0313236	-0.11744	-0.00992997	0.0213934	0.0604321	-0.0345503	0.0228261	-0.0232822	0.0105282	0.00951165
242	1707	H	H1	C	C4	1	SC	LQD	0	-0.160744	0.00386991	-0.0528708	-0.0101009	0.0119961	0.073347	-0.0190707	-0.0279871	0.0247819	0.0250397	-0.117449	0.0159188	-0.0462746	-0.0273655	-0.00796283	-0.0308833	0.0463395	-0.00342297	0.00324233	-0.0124475
244	1761	C	C3	C	C4	0	IVC	LQD	0	-0.0264392	-0.116493	-0.0125174	-0.0324557	0.0156016	0.00446145	0.0879926	-0.0437062	0.0356715	0.00291206	-0.0845732	0.0123573	-0.0493738	-0.0162957	0.0536591	0.0225822	0.0343228	0.038799	-0.00511741	-0.0142999
245	1596	C	C1	C	C4	0	SC	SD	0	0.0744239	0.0249525	-0.0323825	-0.0290551	0.0252853	-0.0677472	0.0968123	-0.00741797	0.0363943	0.0153524	0.108534	-0.166889	0.0310236	0.040037	-0.113287	0.0473366	-0.019063	0.0338744	-0.0147595	0.0166715
246	1605	C	C4	C	C1	0	IVC	SD	0	0.0617515	0.0533596	-0.018187	-0.0565834	-0.0445047	-0.0576242	0.0454661	-0.0270234	0.0298663	-0.0543446	0.208614	0.125117	0.0246648	0.012146	0.0174218	-0.0363141	-0.00466224	-0.0323573	0.0446564	0.0351792
247	1598	C	C3	H	H4	1	SC	LQD	0	0.0415905	-0.158579	-0.0412931	-0.0453609	-0.0371763	0.0153143	0.0653786	0.0328198	0.0360378	0.0966074	-0.0566289	0.0510562	0.0446091	-0.0699763	-0.0227938	0.0318457	-0.0315814	-0.0410014	0.0363952	0.0256793
248	1637	H	H4	C	C3	1	IVC	SD	0	0.155055	-0.0362673	0.0717414	-0.0631531	0.0473713	0.0240803	-0.00241172	-0.0420736	0.0351595	0.00263083	0.0363491	-0.0866527	0.008869	-0.0304961	0.122058	0.0531321	-0.0624554	0.0020268	0.019967	-0.00810629
251	1602	C	C3	H	H1	1	IVC	SD	0	0.11995	0.0447112	0.0944947	-0.00933976	-0.0108637	0.0499213	-0.0921718	-0.0337808	-0.0173477	-0.000698486	0.0790701	-0.14105	0.044947	0.00568003	0.0329187	-0.0620638	-0.0118044	-0.0987207	-0.0206072	0.0506777
252	1779	H	H1	C	C3	1	SC	LQD	0	-0.155233	-0.0338692	0.0289132	-0.0291214	0.112246	-0.00134824	-0.0451399	0.000168508	-0.00683651	0.023656	-0.166257	-0.0317791	-0.0705915	0.0295281	0.0428284	-0.0175075	0.0291363	0.0193733	-0.000989127	0.0136866
253	1604	C	C4	H	H1	0	IVC	LQD	0	-0.088115	-0.0243529	-0.028311	-0.0161411	-0.0724155	-0.0167468	0.0120127	-0.0273254	-0.0203405	-0.0279575	-0.0519011	-0.0118455	0.0016115	-0.0160219	-0.0163479	-0.0406986	-0.013826	-0.0185493	0.0116102	0.00834696
258	1781	H	H1	H	H4	1	SC	SD	0	0.0811979	0.0565268	-0.035156	-0.0212256	0.129318	0.0651226	0.0169557	0.0280624	0.0102531	0.0449426	0.0518329	-0.127215	-0.105134	-0.00843161	0.0271246	0.104402	0.0314749	0.0309194	0.00109901	0.0499949
262	1645	C	C2	H	H4	1	SC	SD	0	0.0641461	0.00817234	0.0410395	-0.0921882	-0.000971532	0.0395333	0.0166832	0.00983794	0.00161987	0.0229624	0.0290434	-0.095933	0.0423607	-0.00608047	0.0338156	-0.0264916	-0.029053	-0.0617031	0.0103421	0.0159825
[truncated: 522 more rows]

## Sheet: Tax_legend
ITax	Tax_level_name	Tax_level_no	tax_full	Phylum	Class	Order	Family	Genus	Species
[truncated: 600 more rows]

[truncated: 6 more sheets: Phylum, Class, Order, Family, Genus, Species]
